# Supplementary material for: Exploring the mechanism and counterion activity regulation in the CoIII(salen)-catalyzed hydration of propylene oxide
Source: Royal Society of Chemistry journal article supplement (doi:10.1039/d0cp03996a), 2020-01-01
Supplement: d0cp03996a1.pdf [file d0cp03996a1.pdf]

## Supporting information

X = Cl<sup>-</sup>, OAc<sup>-</sup>, OTs<sup>-</sup>, OH<sup>-</sup>

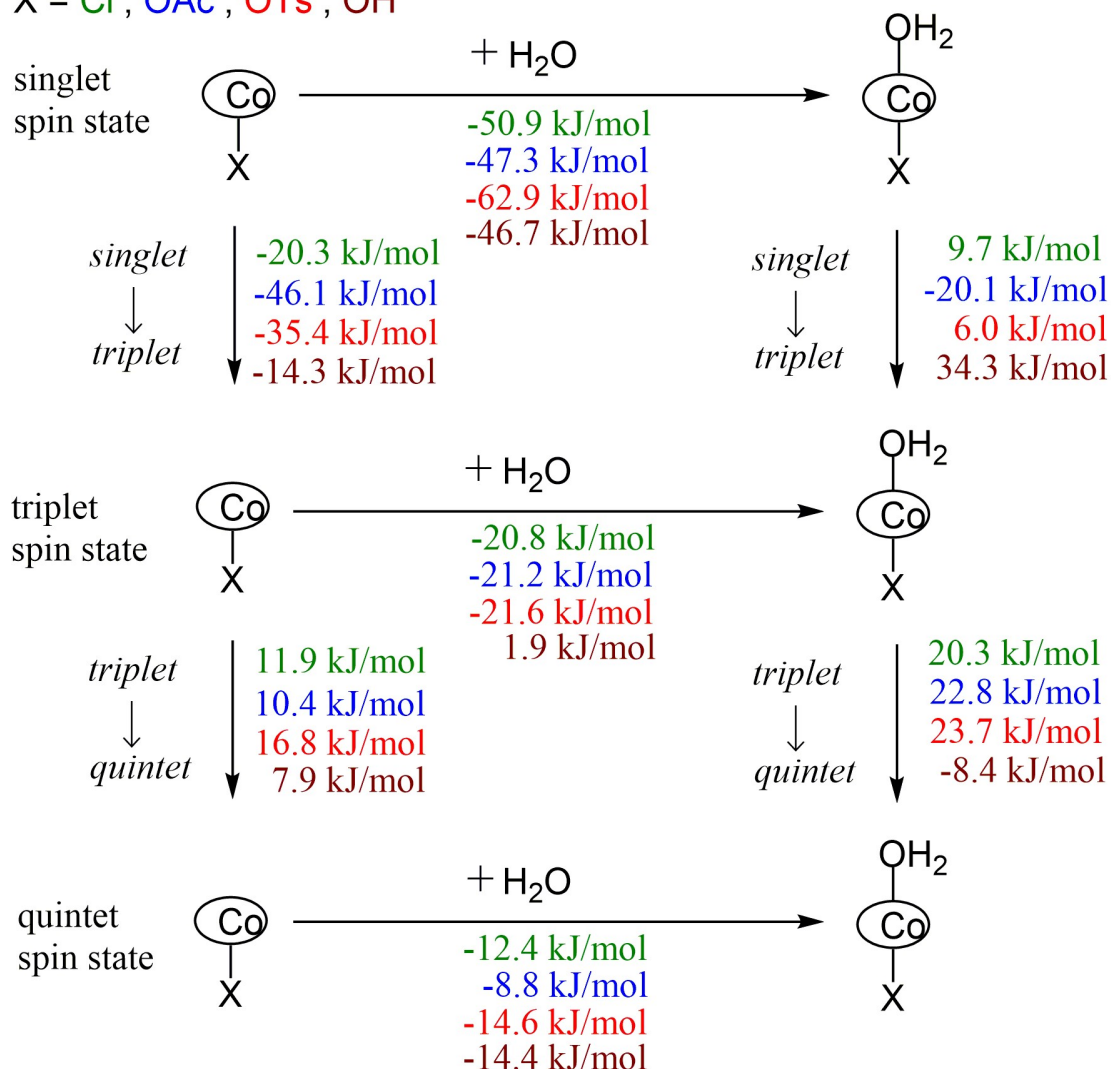

**Fig. S1** The spin state of five-coordinated Co<sup>III</sup>(salen)-X (X = Cl<sup>-</sup>, OAc<sup>-</sup>, OTs<sup>-</sup>, OH<sup>-</sup>) and six-coordinate H<sub>2</sub>O-Co<sup>III</sup>-X (X = Cl<sup>-</sup>, OAc<sup>-</sup>, OTs<sup>-</sup>, OH<sup>-</sup>) calculated at the B3LYP-D3BJ/LanL2TZ(f) (for Co) 6-31G(d,p) (for all non-metal atoms) level in the gas phase. The structures of salen complexes are complete or unsimplified, that is, -C(CH<sub>3</sub>)<sub>3</sub> groups in salen-complexes are not replaced by H atoms in calculations (see computational details).

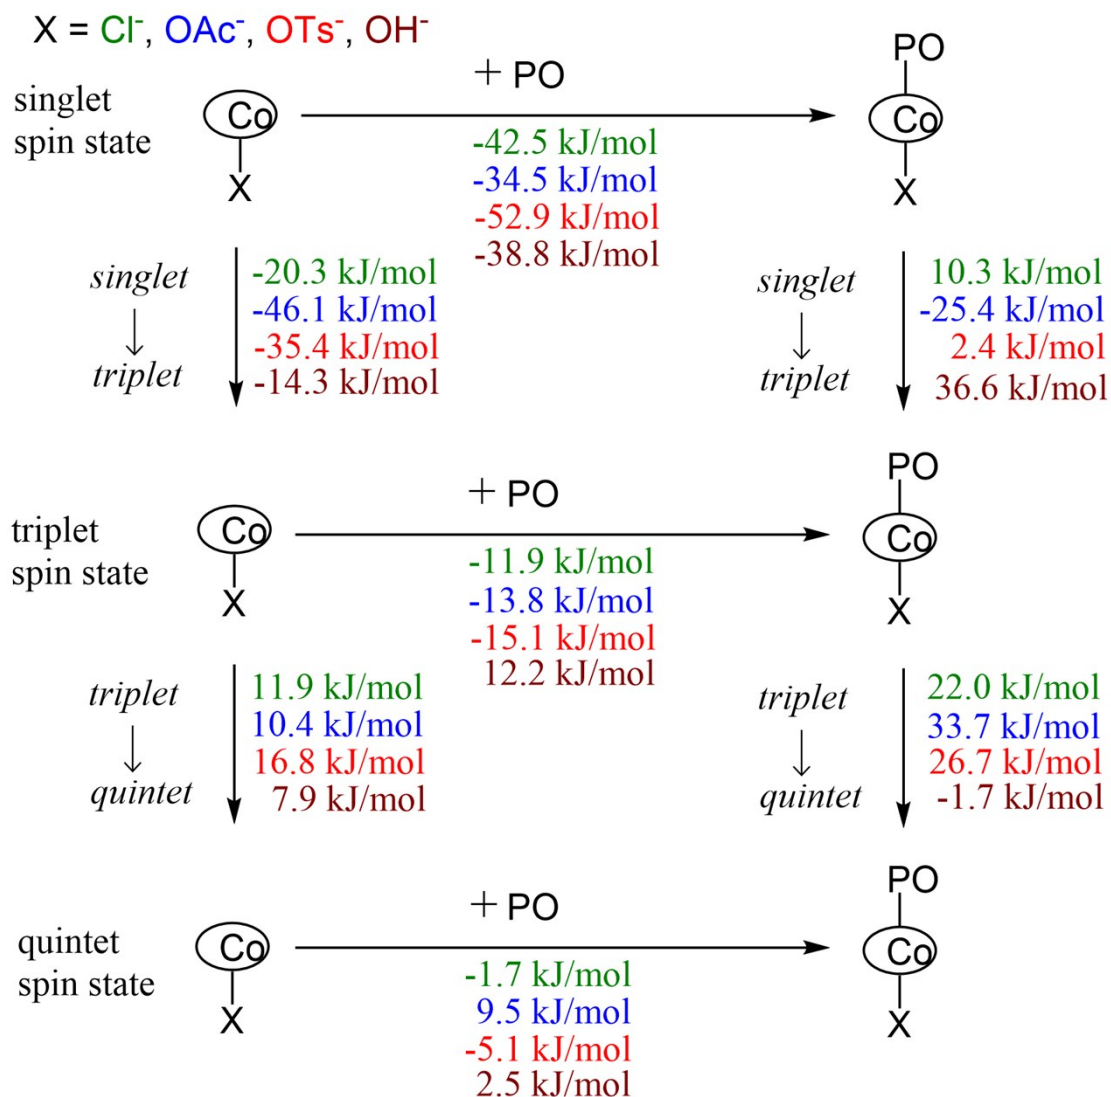

**Fig. S2** The spin state of five-coordinated Co<sup>III</sup>(salen)-X (X = Cl<sup>-</sup>, OAc<sup>-</sup>, OTs<sup>-</sup>, OH<sup>-</sup>) and six-coordinate PO-Co<sup>III</sup>-X (X = Cl<sup>-</sup>, OAc<sup>-</sup>, OTs<sup>-</sup>, OH<sup>-</sup>) calculated at the B3LYP-D3BJ/LanL2TZ(f) (for Co) 6-31G(d,p) (for all non-metal atoms) level in the gas phase. The structures of Co<sup>III</sup>(salen) are unsimplified.

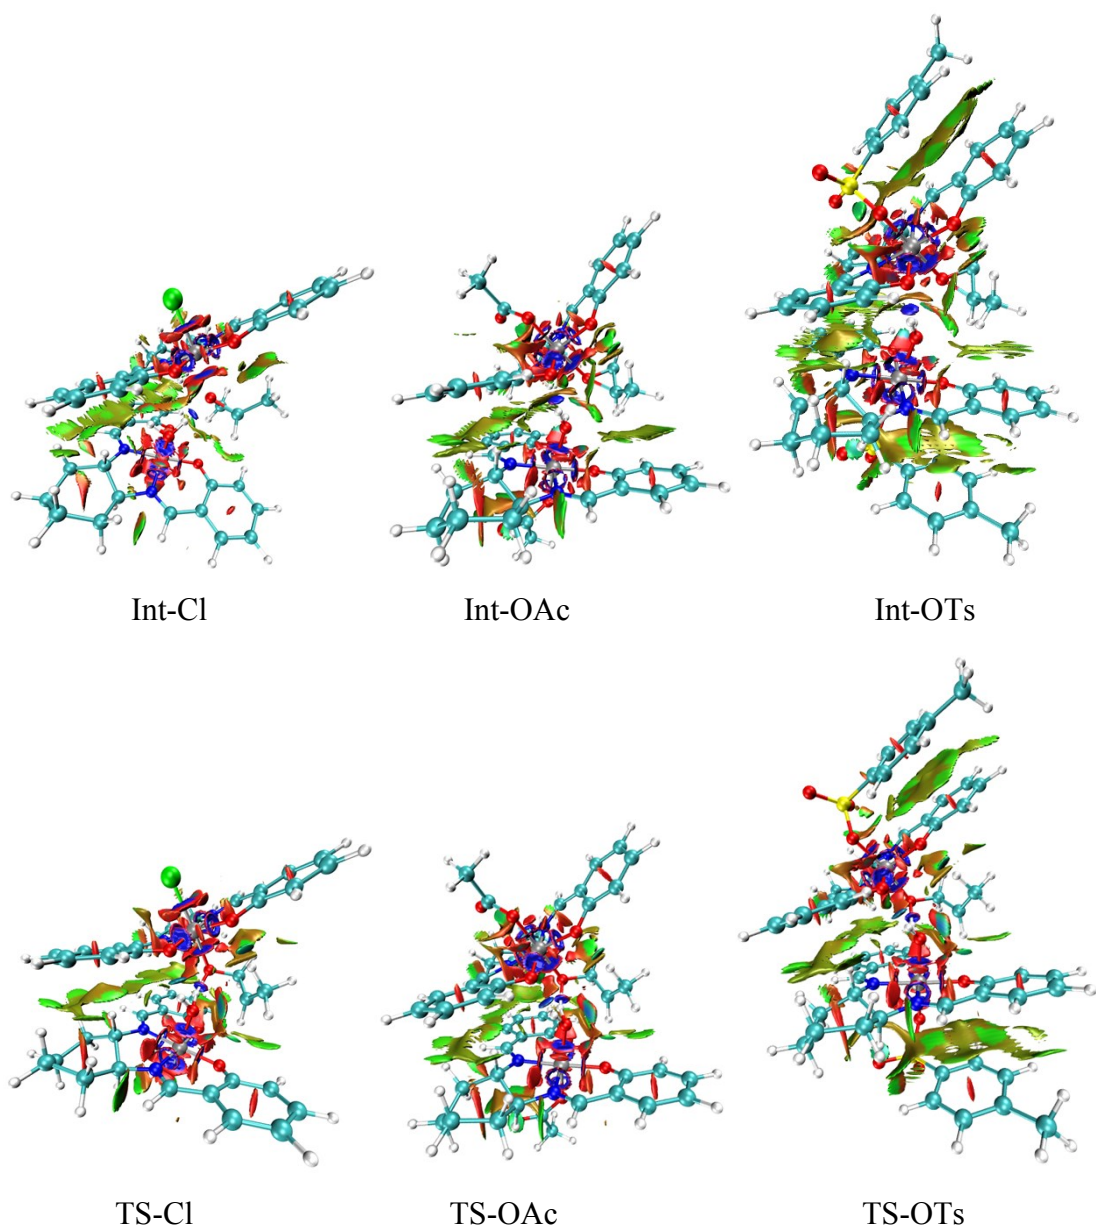

**Fig. S3** NCI plots for the three transition states and precursors of route IV-m, blue regions representing strong electrostatic interactions and green regions representing more dispersive attractive interactions and red regions representing repulsive interactions. The  $\text{sign}(\lambda_2)\rho$  is ranging from -0.09 to 0.09 a.u..

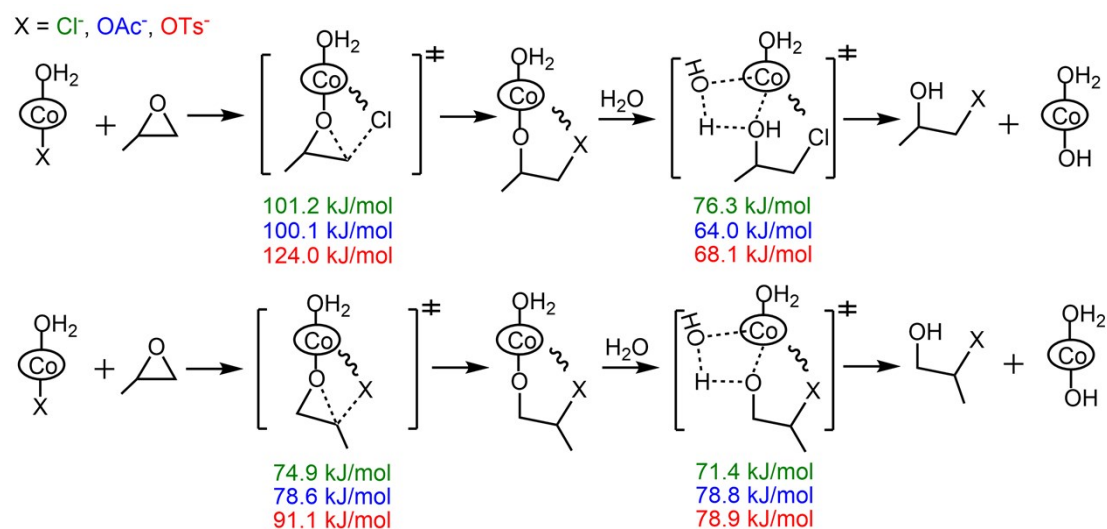

**Fig. S4** The two pathways of respectively attacking the terminal or middle carbon of PO and the subsequent hydrolysis to form six-coordinated nucleophile H<sub>2</sub>O-Co<sup>III</sup>-OH calculated at the B3LYP-D3BJ/def2TZVP (SMD)//B3LYP-D3BJ/LanL2TZ(f) (for Co) 6-31G(d,p) (for all non-metal atoms) level. The hydrogen bond interaction of X with H atoms of Co<sup>III</sup>(salen) ligand was signed with a wavy line. The free energy barriers were listed under the corresponding transition state structures.

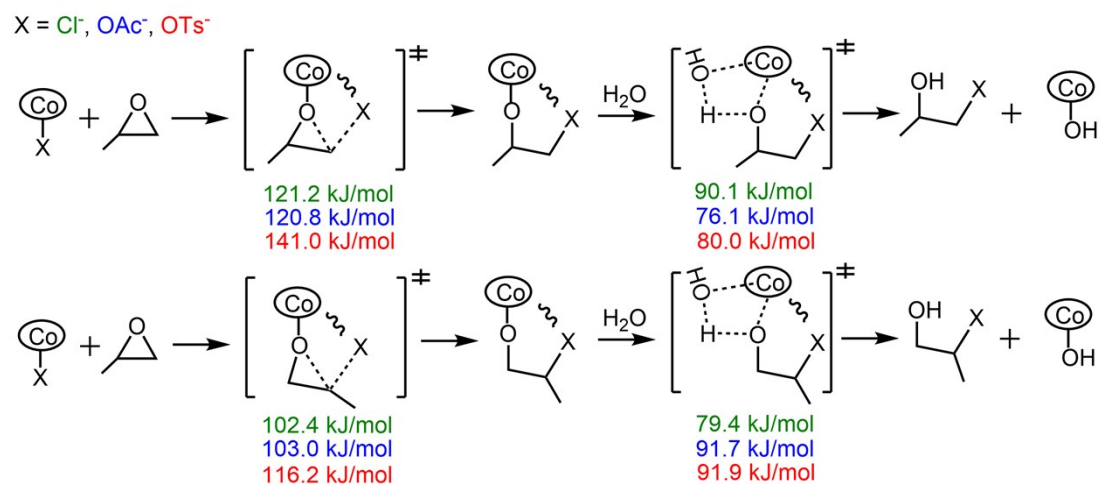

**Fig. S5** The two pathways of respectively attacking the terminal or middle carbon of PO and the subsequent hydrolysis to form five-coordinated Co<sup>III</sup>(salen)-OH calculated at the B3LYP-D3BJ/def2TZVP (SMD)//B3LYP-D3BJ/LanL2TZ(f) (for Co) 6-31G(d,p) (for all non-metal atoms) level. The hydrogen bond interaction of X between H of Co<sup>III</sup>(salen) ligand was denoted with wavy line. The free energy barriers were listed under the corresponding transition state structures.

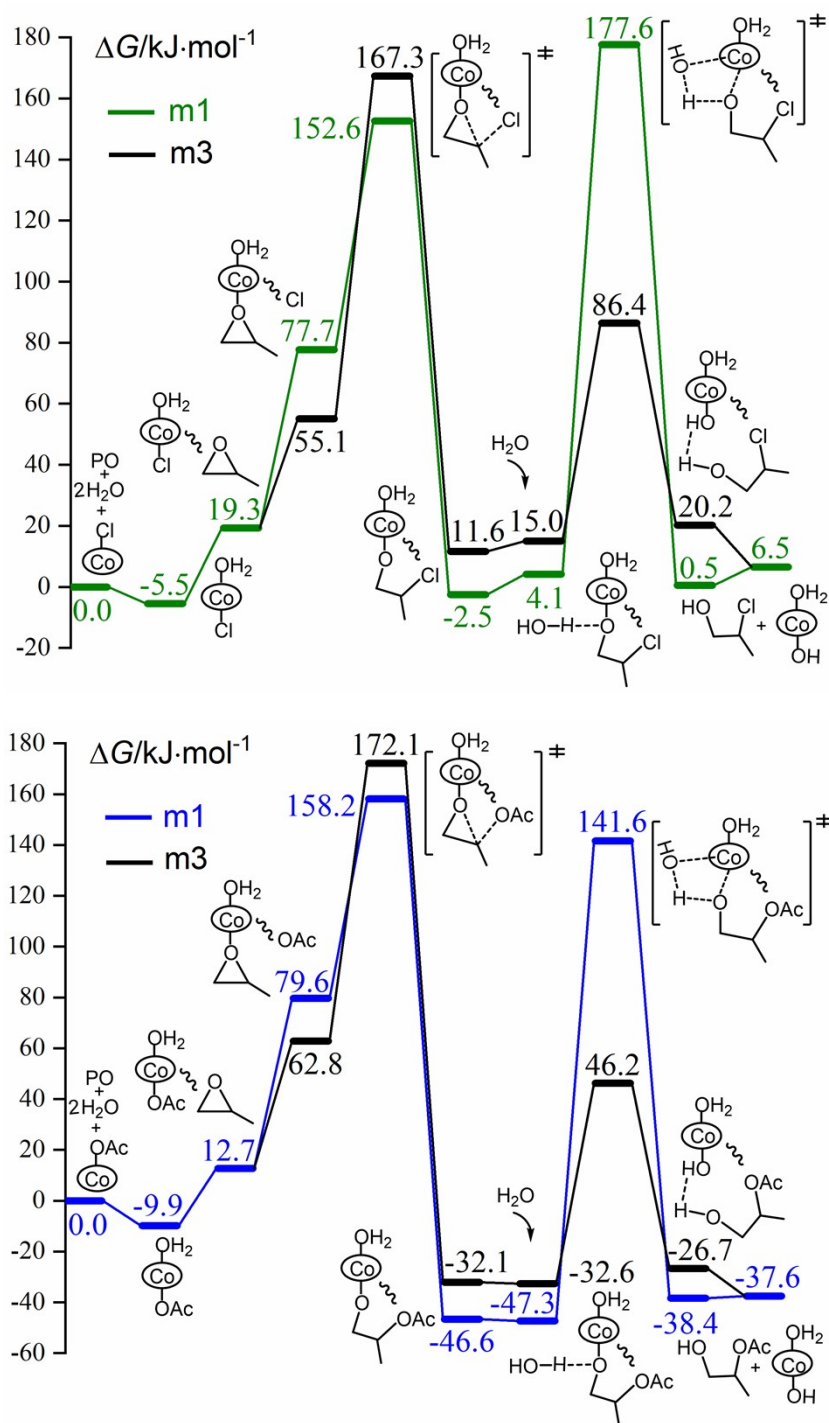

**Fig. S6** Potential relative free energy profiles and sketch structures of transition states and intermediates for the formation of six-coordinated nucleophile  $\text{H}_2\text{O}\text{-Co}^{\text{III}}\text{-OH}$  calculated at the B3LYP-D3BJ/def2TZVP (SMD)//B3LYP-D3BJ/LanL2TZ(f) (for Co) 6-31G(d,p) (for all non-metal atoms) level.

X = Cl<sup>-</sup>, OAc<sup>-</sup>, OTs<sup>-</sup>

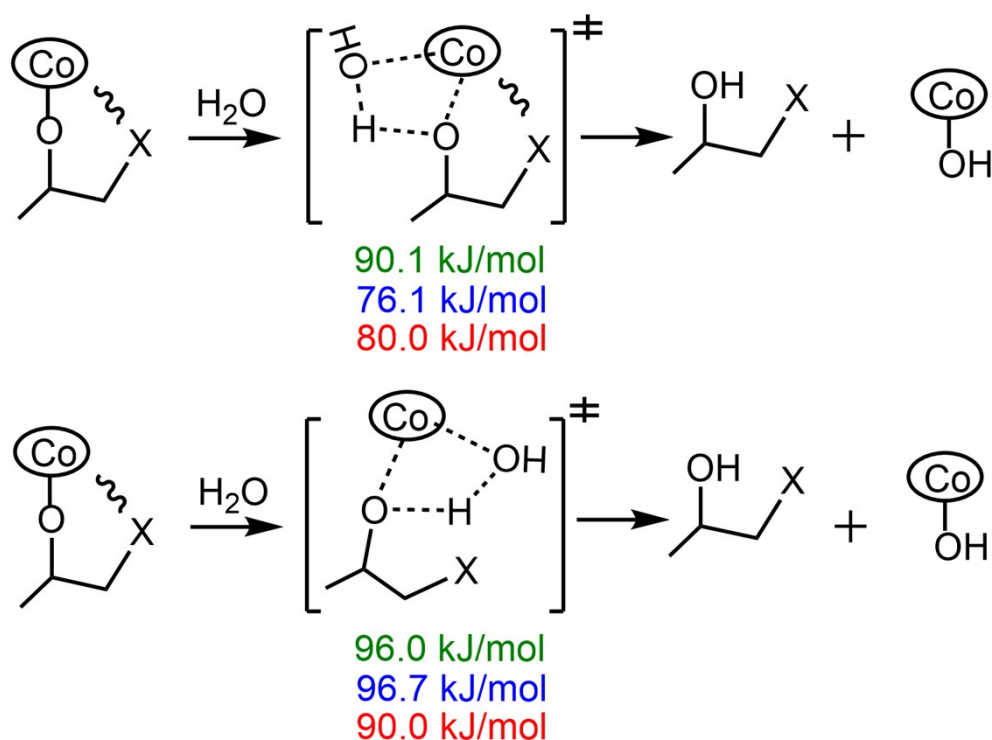

**Fig. S7** The two pathways of hydrolysis after counterion addition step to form five-coordinated Co<sup>III</sup>(salen)-OH calculated at the B3LYP-D3BJ/def2TZVP (SMD)//B3LYP-D3BJ/LanL2TZ(f) (for Co) 6-31G(d,p) (for all non-metal atoms) level. The hydrogen bond interaction of X with H atoms of Co<sup>III</sup>(salen) ligand was denoted with a wavy line. The free energy barriers were listed under the corresponding transition state structures.

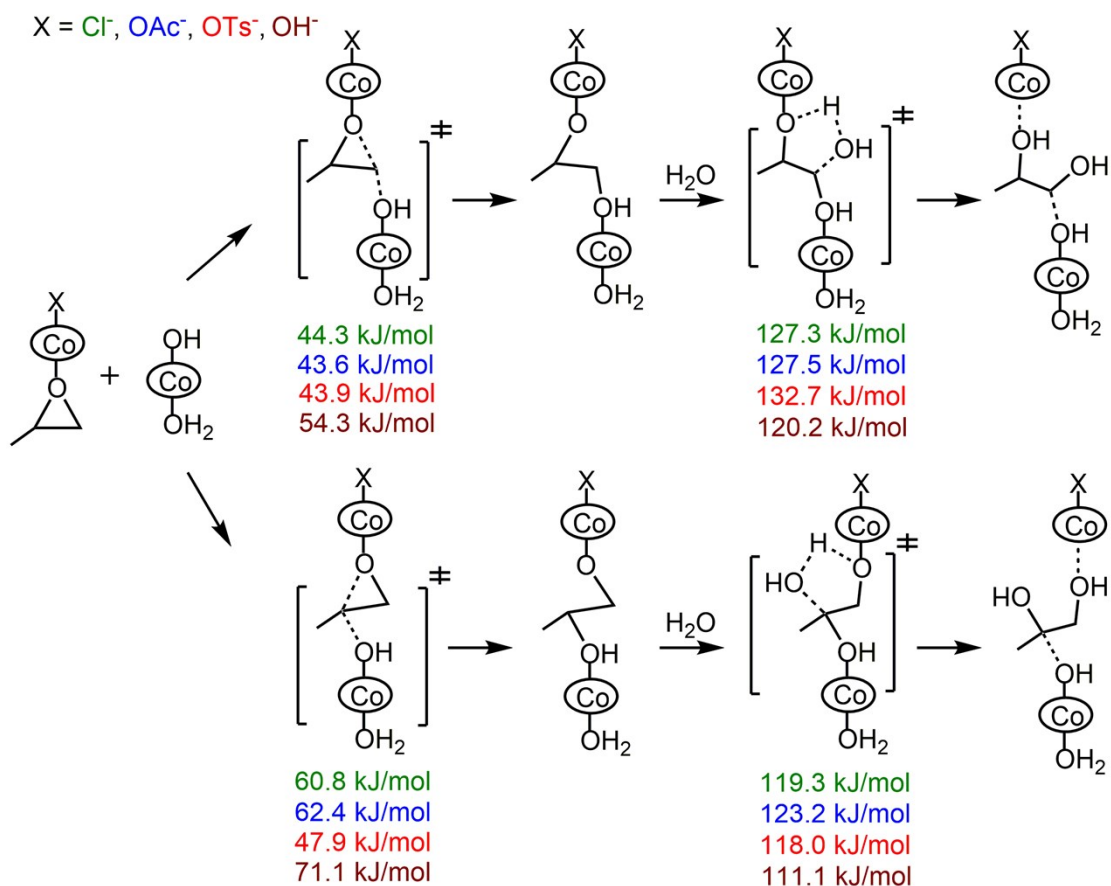

**Fig. S8** The stepwise pathways of ring-opening through H<sub>2</sub>O-Co<sup>III</sup>-OH attacking the terminal or middle carbon of PO activated by Co<sup>III</sup>(salen)-X from the back and the subsequent hydration reaction calculated at the B3LYP-D3BJ/def2TZVP (SMD)//B3LYP-D3BJ/LanL2TZ(f) (for Co) 6-31G(d,p) (for all non-metal atoms) level. The free energy barriers were listed under the corresponding transition state structures.



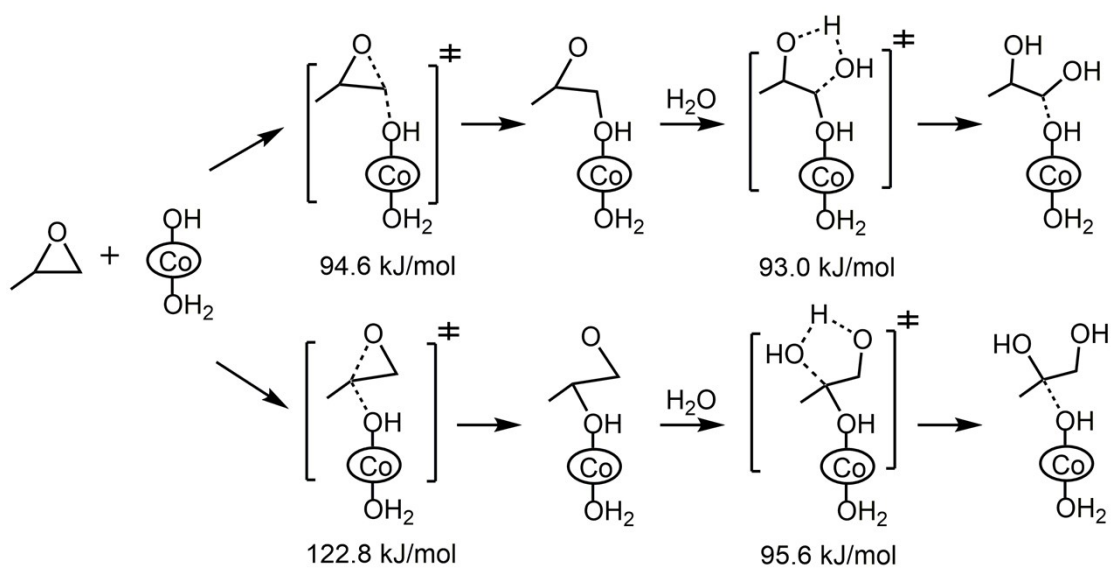

**Fig. S9** The stepwise pathways of ring-opening through  $\text{H}_2\text{O-Co}^{\text{III}}\text{-OH}$  attacking the terminal or middle carbon of unactivated PO from the back and the subsequent hydration reaction calculated at the B3LYP-D3BJ/def2TZVP (SMD)//B3LYP-D3BJ/LanL2TZ(f) (for Co) 6-31G(d,p) (for all non-metal atoms) level. The free energy barriers were listed under the corresponding transition state structures.

**Table S1** The free energy barriers (kJ/mol) of the bimetallic ring-opening for the

different counterions based on the different basis sets.

|                                                                     | PO-Co <sup>III</sup> -Cl<br>+ H <sub>2</sub> O-Co <sup>III</sup> -<br>OH | PO-Co <sup>III</sup> -OAc<br>+<br>H <sub>2</sub> O-Co <sup>III</sup> -OH | PO-Co <sup>III</sup> -OTs<br>+<br>H <sub>2</sub> O-Co <sup>III</sup> -OH |
|---------------------------------------------------------------------|--------------------------------------------------------------------------|--------------------------------------------------------------------------|--------------------------------------------------------------------------|
| B3LYP-D3BJ/def2TZVP<br>(SMD)//B3LYP-D3BJ/<br>LanL2TZ(f)~6-31G(d,p)  | 44.3                                                                     | 43.6                                                                     | 43.9                                                                     |
| B3LYP-D3BJ/def2TZVP<br>(SMD)//B3LYP-D3BJ/<br>LanL2TZ(f)~6-311G(d,p) | 45.0                                                                     | 45.5                                                                     | 43.9                                                                     |

**Table S2** The free energy barriers of different routes catalyzed by Co<sup>III</sup>(salen)-Cl of simplified and unsimplified catalyst structures calculated at the B3LYP-D3BJ/LanL2TZ(f) (for Co) 6-31G(d,p) (for all non-metal atoms) level in the gas phase.

|                                                                       | Unsimplified structure<br>(S,S) |                  | Simplified structure (S,S) |                  |
|-----------------------------------------------------------------------|---------------------------------|------------------|----------------------------|------------------|
|                                                                       | terminal<br>carbon              | middle<br>carbon | terminal<br>carbon         | middle<br>carbon |
| PO + H <sub>2</sub> O                                                 | 206.9                           | 193.9            | 206.9                      | 193.9            |
| PO + H <sub>2</sub> O-Co <sup>III</sup> -Cl                           | 196.1                           | 152.6            | 194.3                      | 178.1            |
| PO-Co <sup>III</sup> -Cl + H <sub>2</sub> O                           | 163.4                           | 134.2            | 164.0                      | 133.6            |
| PO + H <sub>2</sub> O-Co <sup>III</sup> -OH                           | 135.9                           | 160.0            | 137.7                      | 160.1            |
| PO-Co <sup>III</sup> -Cl + H <sub>2</sub> O-<br>Co <sup>III</sup> -OH | 42.4                            | --               | 39.0                       | --               |

**Table S3** The geometry structures and relative free energy difference  $\Delta G$  of four

Co<sup>III</sup>(salen)-OTs and two PO-Co<sup>III</sup>-OTs calculated at the B3LYP-D3BJ/LanL2TZ(f) (for Co) 6-31G(d,p) (for all non-metal atoms) level in the gas phase. The catalyst structures used are unsimplified.

| Catalyst structures                                                                                                       | $\Delta G$ (kJ/mol) |
|---------------------------------------------------------------------------------------------------------------------------|---------------------|
| 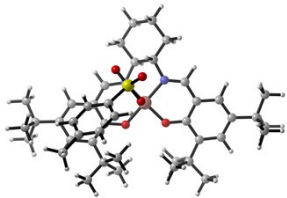<br>Co <sup>III</sup> (salen)(S,S)-OTs   | 0.0                 |
| <br>Co <sup>III</sup> (salen)(R,S)-OTs   | 3.0                 |
| <br>Co <sup>III</sup> (salen)(S,R)-OTs  | 22.7                |
| <br>Co <sup>III</sup> (salen)(R,R)-OTs | 23.6                |
| <br>PO(R)-Co <sup>III</sup> (S,S)-OTs  | 0.0                 |

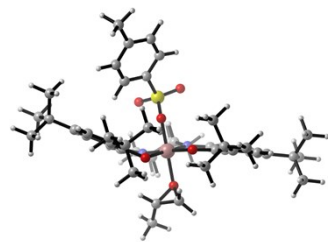

1.9

PO(S)-Co<sup>III</sup>(S,S)-OTs

---

**Table S4** The spin multiplicity of low-lying states of all the species studied.\*

| singlet state                                                                                  | triplet state                                                            |
|------------------------------------------------------------------------------------------------|--------------------------------------------------------------------------|
| H <sub>2</sub> O-Co <sup>III</sup> -Cl                                                         | Co <sup>III</sup> (salen)-Cl                                             |
| PO-Co <sup>III</sup> -Cl                                                                       | Co <sup>III</sup> (salen)-OTs                                            |
| H <sub>2</sub> O-Co <sup>III</sup> -OTs                                                        | Co <sup>III</sup> (salen)-OH                                             |
| PO-Co <sup>III</sup> -OTs                                                                      | Co <sup>III</sup> (salen)-OAc                                            |
| H <sub>2</sub> O-Co <sup>III</sup> -OH                                                         | H <sub>2</sub> O-Co <sup>III</sup> -OAc                                  |
| PO-Co <sup>III</sup> -OH                                                                       | PO-Co <sup>III</sup> -OAc                                                |
| PO~H <sub>2</sub> O-Co <sup>III</sup> -X                                                       |                                                                          |
| [PO~H <sub>2</sub> O-Co <sup>III</sup> -X] <sup>‡</sup>                                        |                                                                          |
| PG~Co <sup>III</sup> (salen)-X                                                                 |                                                                          |
| X-Co <sup>III</sup> -PO~H <sub>2</sub> O                                                       |                                                                          |
| [X-Co <sup>III</sup> -PO~H <sub>2</sub> O] <sup>‡</sup>                                        |                                                                          |
| X-Co <sup>III</sup> -PO~H <sub>2</sub> O-Co <sup>III</sup> -X                                  |                                                                          |
| [X-Co <sup>III</sup> -PO~H <sub>2</sub> O-Co <sup>III</sup> -X] <sup>‡</sup>                   |                                                                          |
| Co <sup>III</sup> (salen)-X~PG~Co <sup>III</sup> (salen)-X                                     |                                                                          |
|                                                                                                | Co <sup>III</sup> (salen)-PO~X                                           |
| H <sub>2</sub> O-Co <sup>III</sup> -X~PO                                                       | [Co <sup>III</sup> (salen)-PO~X] <sup>‡</sup>                            |
| [H <sub>2</sub> O-Co <sup>III</sup> -PO~X] <sup>‡</sup>                                        | Co <sup>III</sup> (salen)-PO-X                                           |
| H <sub>2</sub> O-Co <sup>III</sup> -PO-X                                                       | Co <sup>III</sup> (salen)-PO-X~H <sub>2</sub> O                          |
| H <sub>2</sub> O-Co <sup>III</sup> -PO-X~H <sub>2</sub> O                                      | [Co <sup>III</sup> (salen)-PO-X~H <sub>2</sub> O] <sup>‡</sup>           |
| H <sub>2</sub> O-Co <sup>III</sup> -OH~CH <sub>3</sub> CHOHCH <sub>2</sub> X                   | Co <sup>III</sup> (salen)-OH~CH <sub>3</sub> CHOHCH <sub>2</sub> X       |
|                                                                                                | H <sub>2</sub> O-Co <sup>III</sup> -PO~X                                 |
| PO-Co <sup>III</sup> -X~H <sub>2</sub> O-Co <sup>III</sup> -OH                                 | [H <sub>2</sub> O-Co <sup>III</sup> -PO-X~H <sub>2</sub> O] <sup>‡</sup> |
| [PO-Co <sup>III</sup> -X~H <sub>2</sub> O-Co <sup>III</sup> -OH] <sup>‡</sup>                  |                                                                          |
| X-Co <sup>III</sup> -PO-OH-Co <sup>III</sup> -H <sub>2</sub> O                                 |                                                                          |
| X-Co <sup>III</sup> -PO-OH-Co <sup>III</sup> -H <sub>2</sub> O~H <sub>2</sub> O                |                                                                          |
| [X-Co <sup>III</sup> -PO-OH-Co <sup>III</sup> -H <sub>2</sub> O~H <sub>2</sub> O] <sup>‡</sup> |                                                                          |
| Co <sup>III</sup> (salen)-X~PG~OH-Co <sup>III</sup> -H <sub>2</sub> O                          |                                                                          |

\*: This table shows that the ground states of all the six-coordinated species, except the four marked light blue, are in singlet states. All the five-coordinated ones are in triplet states. X = Cl<sup>-</sup>, OAc<sup>-</sup> and OTs<sup>-</sup>.

**Table S5** The important bond lengths (in Å) and charges (e) of some atoms of transition states in route IV-m.\*

|         |            | TS-Cl  | TS-OAc | TS-OTs |
|---------|------------|--------|--------|--------|
| bond    | Co1...O1   | 1.958  | 1.965  | 1.933  |
|         | O2-H1...O1 | 1.470  | 1.489  | 1.453  |
|         | O2...C2    | 2.425  | 2.402  | 2.423  |
|         | Co2...O2   | 1.958  | 1.964  | 1.938  |
| charges | NPA        | 0.441  | 0.611  | 0.623  |
|         | Co1 ADCH   | 0.225  | 0.257  | 0.242  |
|         | Hirshfeld  | 0.199  | 0.237  | 0.240  |
|         | NPA        | -0.655 | -0.662 | -0.647 |
|         | O1 ADCH    | -0.245 | -0.252 | -0.249 |
|         | Hirshfeld  | -0.201 | -0.203 | -0.195 |
|         | NPA        | 0.542  | 0.542  | 0.544  |
|         | H1 ADCH    | 0.146  | 0.145  | 0.146  |
|         | Hirshfeld  | 0.107  | 0.107  | 0.107  |
|         | NPA        | -0.858 | -0.860 | -0.851 |
|         | O2 ADCH    | -0.255 | -0.262 | -0.270 |
|         | Hirshfeld  | -0.181 | -0.181 | -0.179 |
|         | NPA        | 0.435  | 0.612  | 0.619  |
|         | Co2 ADCH   | 0.184  | 0.223  | 0.247  |
|         | Hirshfeld  | 0.207  | 0.248  | 0.249  |
|         | NPA        | 0.238  | 0.232  | 0.240  |
|         | C2 ADCH    | 0.099  | 0.094  | 0.096  |
|         | Hirshfeld  | 0.198  | 0.196  | 0.199  |
|         | NPA        | -0.160 | -0.159 | -0.160 |
|         | C1 ADCH    | -0.060 | -0.063 | -0.056 |
|         | Hirshfeld  | 0.026  | 0.027  | 0.029  |

\*: The atomic numbering (O1 etc.) is marked on the route IV-m in Fig. 1.

**Table S6** The ADCH and Hirshfeld charge (e) of metal Co in five-coordinated complexes.

|    |           | Co <sup>III</sup> (salen)-Cl | Co <sup>III</sup> (salen)-OAc | Co <sup>III</sup> (salen)-OTs |
|----|-----------|------------------------------|-------------------------------|-------------------------------|
| Co | ADCH      | 0.330                        | 0.309                         | 0.395                         |
|    | Hirshfeld | 0.280                        | 0.325                         | 0.329                         |

The structures of transition states (t), corresponding reactant complexes (r) and product complexes (p) in all the routes where the substrate is PO.

Et, Er and Ep denote the single point energies of transition states, reactants (or reactant complexes) and products (or product complexes) calculated at at B3PLY-D3BJ/ def2TZVP respectively. Frequencies are in unit of  $\text{cm}^{-1}$ .

**I-t (PO + H<sub>2</sub>O)**

PO + H<sub>2</sub>O = PG

Charge: 0

Spin Multiplicity: 1

Sum of electronic and thermal Free Energies (a.u.): -269.403532

Thermal correction to Gibbs Free Energy (a.u.): 0.079054

Imaginary frequencies: -515.92

Calculation of single point energy based on the optimized structure, Et = -269.6079696 a.u.

|   |             |             |             |
|---|-------------|-------------|-------------|
| C | -0.65587800 | -0.02462000 | 0.39589200  |
| C | 0.26935600  | 0.98525600  | -0.14568900 |
| O | 0.02916000  | -1.08001200 | -0.19960000 |
| H | -0.62899600 | -0.03891600 | 1.50074400  |
| H | 0.82753200  | 1.70613000  | 0.43742000  |
| H | 0.25905800  | 1.10801000  | -1.22308300 |
| C | -2.10150900 | 0.09709500  | -0.08148900 |
| H | -2.62568700 | -0.82328700 | 0.19380600  |
| H | -2.61970500 | 0.94970100  | 0.37068700  |
| H | -2.13176000 | 0.18862200  | -1.17122800 |
| O | 2.19520800  | -0.00792400 | 0.14264700  |
| H | 1.45577000  | -0.73178700 | 0.07323700  |
| H | 2.59703200  | -0.00136700 | -0.73824800 |

**I-t (PO + H<sub>2</sub>O)**

PO + H<sub>2</sub>O = PG

Charge: 0

Spin Multiplicity: 1

Sum of electronic and thermal Free Energies (a.u.): -269.482347

Thermal correction to Gibbs Free Energy (a.u.): 0.079395

No imaginary frequency

Calculation of single point energy based on the optimized structure, Er = -269.6834746 a.u.

|   |             |             |             |
|---|-------------|-------------|-------------|
| C | -0.66606100 | -0.26602500 | 0.27113600  |
| C | -0.14797000 | 1.10286500  | 0.37276300  |
| O | 0.03682200  | 0.34020700  | -0.84006900 |
| H | -0.08347600 | -1.04431200 | 0.76385100  |
| H | 0.76763300  | 1.27981800  | 0.93210300  |
| H | -0.83206500 | 1.94465200  | 0.27900200  |
| C | -2.12311200 | -0.56172200 | 0.04395500  |
| H | -2.24335500 | -1.45354400 | -0.57895300 |
| H | -2.62741000 | -0.74534300 | 0.99861500  |
| H | -2.61442600 | 0.27680700  | -0.45683100 |
| O | 2.49427700  | -0.54710100 | 0.14996800  |
| H | 1.79297200  | -0.31342000 | -0.48499300 |
| H | 3.21419500  | 0.05978400  | -0.05911100 |

**I-t (PO + H<sub>2</sub>O)**

PO + H<sub>2</sub>O = PG

Charge: 0

Spin Multiplicity: 1

Sum of electronic and thermal Free Energies (a.u.): -269.509266

Thermal correction to Gibbs Free Energy (a.u.): 0.084762

No imaginary frequency

Calculation of single point energy based on the optimized structure, Ep = -269.7148076 a.u.

|   |             |             |             |
|---|-------------|-------------|-------------|
| C | -0.46858300 | 0.05322900  | -0.34353100 |
| C | 0.71243100  | -0.74494100 | 0.19744400  |
| O | -0.42498500 | 1.37300500  | 0.18064300  |
| H | -0.37638200 | 0.07726500  | -1.44311800 |
| H | 0.72199700  | -1.75820400 | -0.23113600 |
| H | 0.61563200  | -0.82753300 | 1.28981500  |
| C | -1.80449400 | -0.56264400 | 0.03938100  |
| H | -2.62175600 | 0.05278700  | -0.34451300 |
| H | -1.90515400 | -1.57102400 | -0.37411200 |
| H | -1.90133800 | -0.61453000 | 1.12839500  |



|   |            |             |             |
|---|------------|-------------|-------------|
| O | 1.88860400 | -0.01677900 | -0.16158300 |
| H | 0.49875200 | 1.65104900  | 0.08559400  |
| H | 2.62317300 | -0.33348400 | 0.37683400  |

**I-m (PO + H<sub>2</sub>O)**

PO + H<sub>2</sub>O = PG

Charge: 0

Spin Multiplicity: 1

Sum of electronic and thermal Free Energies (a.u.): -269.408511

Thermal correction to Gibbs Free Energy (a.u.): 0.078456

Imaginary frequencies: -483.25

Calculation of single point energy based on the optimized structure, Et = -269.6150501 a.u.

|   |             |             |             |
|---|-------------|-------------|-------------|
| C | -0.54090300 | -0.16734400 | 0.61635800  |
| C | -0.19115600 | 1.25759700  | 0.42049200  |
| O | 0.52308400  | 1.07319500  | -0.74888800 |
| H | -0.24415300 | -0.72553500 | 1.49842500  |
| H | 0.37983600  | 1.66952500  | 1.27387000  |
| H | -1.10239400 | 1.87762700  | 0.30437700  |
| C | -1.45327300 | -0.85177100 | -0.32296100 |
| H | -1.00155300 | -1.77775700 | -0.69012400 |
| H | -2.35619800 | -1.14284600 | 0.23631000  |
| H | -1.71242600 | -0.21220300 | -1.16587600 |
| O | 1.44162300  | -1.07760100 | 0.00669100  |
| H | 1.30228700  | -0.16910600 | -0.47166500 |
| H | 2.12893700  | -0.91534600 | 0.66892400  |

**I-m (PO + H<sub>2</sub>O)**

PO + H<sub>2</sub>O = PG

Charge: 0

Spin Multiplicity: 1

Sum of electronic and thermal Free Energies (a.u.): -269.482355

Thermal correction to Gibbs Free Energy (a.u.): 0.079388

No imaginary frequency

Calculation of single point energy based on the optimized structure, Er = -269.6834841 a.u.

|   |             |             |             |
|---|-------------|-------------|-------------|
| C | -0.66618900 | 0.26583500  | -0.27113100 |
| C | -0.14818800 | -1.10304900 | -0.37302900 |
| O | 0.03685000  | -0.34067800 | 0.84010800  |
| H | -0.08327900 | 1.04407200  | -0.76351300 |
| H | 0.76739300  | -1.27999600 | -0.93243200 |
| H | -0.83215300 | -1.94494800 | -0.27931200 |
| C | -2.12301400 | 0.56220300  | -0.04379800 |
| H | -2.24251200 | 1.45370400  | 0.57971100  |
| H | -2.62710200 | 0.74689200  | -0.99835900 |
| H | -2.61499300 | -0.27629600 | 0.45637800  |
| O | 2.49407100  | 0.54709800  | -0.15009400 |
| H | 1.79300700  | 0.31130400  | 0.48442200  |
| H | 3.21661500  | -0.05602800 | 0.06073700  |

**I-m (PO + H<sub>2</sub>O)**

PO + H<sub>2</sub>O = PG

Charge: 0

Spin Multiplicity: 1

Sum of electronic and thermal Free Energies (a.u.): -269.508860

Thermal correction to Gibbs Free Energy (a.u.): 0.085339

No imaginary frequency

Calculation of single point energy based on the optimized structure, Ep = -269.7139385 a.u.

|   |             |             |             |
|---|-------------|-------------|-------------|
| C | 0.54691800  | 0.10176100  | 0.48918800  |
| C | -0.94735500 | -0.18892800 | 0.66539100  |
| O | -1.59739600 | -0.26706800 | -0.58848400 |
| H | 1.00490600  | 0.25425600  | 1.47861700  |
| H | -1.39335500 | 0.59938200  | 1.29920600  |
| H | -1.09826700 | -1.14428000 | 1.17947300  |
| C | 1.27874400  | -1.00598800 | -0.25196600 |
| H | 2.31297500  | -0.71345000 | -0.44753800 |
| H | 1.27728600  | -1.92515000 | 0.34133600  |
| H | 0.78085200  | -1.20914500 | -1.20295000 |
| O | 0.68268000  | 1.29183100  | -0.30895100 |
| H | -1.21766300 | 0.45903200  | -1.10856700 |
| H | 0.38114900  | 2.04018000  | 0.22422000  |

**II-t (PO + H<sub>2</sub>O-Co<sup>III</sup>-Cl)**

PO + H<sub>2</sub>O-Co<sup>III</sup>-Cl = PG + Co<sup>III</sup>(salen)-Cl

Charge: 0

Spin Multiplicity: 1

Sum of electronic and thermal Free Energies (a.u.): -1908.771747

Thermal correction to Gibbs Free Energy (a.u.): 0.421124

Imaginary frequencies: -514.07

Calculation of single point energy based on the optimized structure, Et = -3147.4758658 a.u.

|    |             |             |             |
|----|-------------|-------------|-------------|
| C  | -2.77185500 | -2.17986100 | 1.87962800  |
| C  | -1.38676000 | -2.61649200 | 1.69405900  |
| O  | -2.29650200 | -1.22122600 | 2.84206100  |
| H  | -3.19633500 | -1.70217700 | 0.99581800  |
| H  | -0.79827900 | -2.45434900 | 0.79349600  |
| H  | -0.93559300 | -3.13513700 | 2.53581100  |
| C  | -3.74245400 | -3.14043600 | 2.53545500  |
| H  | -4.62515100 | -2.58099800 | 2.85670000  |
| H  | -4.05638500 | -3.91290000 | 1.82806300  |
| H  | -3.29193500 | -3.61385400 | 3.41209500  |
| O  | -0.37048500 | -0.33501600 | 1.61656000  |
| H  | -1.59510400 | -0.62271700 | 2.35737800  |
| H  | 0.42320100  | -0.59460000 | 2.10281000  |
| C  | -4.95349600 | -0.46255700 | -1.59110800 |
| C  | -5.14232600 | 0.92271200  | -1.41939800 |
| C  | -3.71864900 | -1.04721400 | -1.38515300 |
| H  | -5.79011500 | -1.08374400 | -1.90042500 |
| C  | -4.05876100 | 1.69497400  | -1.05056700 |
| H  | -6.11421300 | 1.37334600  | -1.58753500 |
| C  | -2.58693600 | -0.27992900 | -0.98092400 |
| H  | -3.56341400 | -2.11027600 | -1.53994800 |
| C  | -2.78162800 | 1.13219800  | -0.82623000 |
| H  | -4.17387100 | 2.76994500  | -0.92920000 |
| O  | -1.47532200 | -0.90405000 | -0.75107900 |
| C  | -1.70780900 | 2.01937900  | -0.48993400 |
| Co | 0.16850100  | -0.11341400 | -0.22520800 |
| N  | -0.49179900 | 1.67528200  | -0.23643600 |
| H  | -1.96099600 | 3.08046300  | -0.47855200 |
| N  | 1.81348300  | 0.64233400  | 0.37993100  |
| Cl | 0.80564200  | 0.18888800  | -2.38356300 |
| C  | 0.59176400  | 2.65328900  | -0.07649700 |
| C  | 2.96816200  | 0.06952400  | 0.29032900  |
| C  | 1.61555500  | 2.00830300  | 0.87275700  |
| C  | 0.19227100  | 4.04727600  | 0.40939900  |
| H  | 3.85675700  | 0.64092900  | 0.56201000  |
| C  | 3.19347300  | -1.28144300 | -0.12553500 |
| C  | 2.86310100  | 2.87759500  | 1.02107600  |
| C  | 1.43900500  | 4.92863700  | 0.57665700  |
| H  | -0.34038300 | 3.95911300  | 1.36583700  |
| H  | -0.49195000 | 4.52178100  | -0.30090100 |
| C  | 4.52952000  | -1.72195700 | -0.26931000 |
| C  | 2.11216100  | -2.19991000 | -0.33003000 |
| C  | 2.47145500  | 4.28096300  | 1.50602500  |
| H  | 3.56493600  | 2.42418200  | 1.72943900  |
| H  | 3.37482600  | 2.94522100  | 0.05220800  |
| H  | 1.14794000  | 5.91280200  | 0.95875100  |
| H  | 1.89381900  | 5.09535700  | -0.40861100 |
| C  | 4.82830800  | -3.02366800 | -0.61569200 |
| H  | 5.32953200  | -1.00355400 | -0.10401900 |
| C  | 2.45081700  | -3.53528800 | -0.67500200 |
| O  | 0.85766100  | -1.89095000 | -0.17410300 |
| H  | 2.05331900  | 4.20795000  | 2.51903000  |
| H  | 3.36467800  | 4.91011700  | 1.58002800  |
| C  | 3.76721500  | -3.92955100 | -0.81580900 |
| H  | 5.85749700  | -3.34509100 | -0.73234300 |
| H  | 1.63260100  | -4.22807000 | -0.84151500 |
| H  | 3.98658100  | -4.95753100 | -1.09237900 |
| H  | 1.12448100  | 1.91404900  | 1.85233800  |
| H  | 1.07070700  | 2.72818000  | -1.06234600 |

**II-t (PO + H<sub>2</sub>O-Co<sup>III</sup>-Cl)**

PO + H<sub>2</sub>O-Co<sup>III</sup>-Cl = PG + Co<sup>III</sup>(salen)-Cl

Charge: 0

Spin Multiplicity: 1

Sum of electronic and thermal Free Energies (a.u.): -1908.845770

Thermal correction to Gibbs Free Energy (a.u.): 0.422903

No imaginary frequency

Calculation of single point energy based on the optimized structure, Er = -3147.5449871 a.u.

|    |             |             |             |
|----|-------------|-------------|-------------|
| C  | -3.45234700 | -2.13268500 | 1.63625200  |
| C  | -2.31201300 | -2.95085700 | 1.20720100  |
| O  | -2.16626200 | -1.98935400 | 2.29142600  |
| H  | -3.70770800 | -1.27826500 | 1.01426400  |
| H  | -1.76115100 | -2.68644600 | 0.30999200  |
| H  | -2.25388000 | -3.98491000 | 1.54319100  |
| C  | -4.55563500 | -2.67898600 | 2.50032100  |
| H  | -4.93113300 | -1.90982200 | 3.18277600  |
| H  | -5.39145100 | -3.01306000 | 1.87616700  |
| H  | -4.20154000 | -3.52603400 | 3.09423000  |
| O  | -0.29448600 | -0.20160000 | 1.82462400  |
| H  | -1.12853300 | -0.75108800 | 1.89910900  |
| H  | 0.38774600  | -0.82735200 | 2.11158300  |
| C  | -4.89337600 | 0.70051700  | -1.55498400 |
| C  | -4.78213600 | 2.09805600  | -1.41019800 |
| C  | -3.82810500 | -0.13525900 | -1.28238000 |
| H  | -5.83077200 | 0.27031200  | -1.89774100 |
| C  | -3.57347700 | 2.62430400  | -1.00388700 |
| H  | -5.62422100 | 2.74495200  | -1.62999400 |
| C  | -2.57828300 | 0.37624500  | -0.83184500 |
| H  | -3.90465200 | -1.20907300 | -1.41510100 |
| C  | -2.46067000 | 1.79903700  | -0.71547500 |
| H  | -3.45322100 | 3.70101500  | -0.90609500 |
| O  | -1.63914100 | -0.46941900 | -0.53157300 |
| C  | -1.22893200 | 2.43564900  | -0.36374000 |
| Co | 0.15939100  | -0.04665300 | -0.13070500 |
| N  | -0.11438700 | 1.84135500  | -0.09676000 |
| H  | -1.24796200 | 3.52635000  | -0.35870700 |
| N  | 1.95231300  | 0.34446100  | 0.40051500  |
| Cl | 0.71084900  | 0.13371100  | -2.29961800 |
| C  | 1.15174800  | 2.57537000  | 0.04272100  |
| C  | 2.96316600  | -0.44314200 | 0.22257100  |
| C  | 2.06028400  | 1.70771700  | 0.92836000  |
| C  | 1.06003400  | 4.00207100  | 0.58755600  |
| H  | 3.96284400  | -0.06717900 | 0.44369800  |
| C  | 2.88229500  | -1.79655900 | -0.23013500 |
| C  | 3.46429300  | 2.30055800  | 1.03471100  |
| C  | 2.46439900  | 4.61055900  | 0.71857400  |
| H  | 0.56052700  | 3.98335200  | 1.56524600  |
| H  | 0.45611500  | 4.63119200  | -0.07346700 |
| C  | 4.08567500  | -2.49250300 | -0.49182100 |
| C  | 1.62330700  | -2.47067700 | -0.35359400 |
| C  | 3.38624500  | 3.73581700  | 1.57562000  |
| H  | 4.08968900  | 1.68970200  | 1.69466200  |
| H  | 3.93565700  | 2.29866900  | 0.04322600  |
| H  | 2.39292000  | 5.61726200  | 1.14349900  |
| H  | 2.90021900  | 4.72204700  | -0.28298900 |
| C  | 4.08172900  | -3.81563400 | -0.88120000 |
| H  | 5.02610300  | -1.95641400 | -0.38463300 |
| C  | 1.65198000  | -3.83487500 | -0.74475700 |
| O  | 0.47459300  | -1.92054600 | -0.07823200 |
| H  | 3.00898200  | 3.71119500  | 2.60670300  |
| H  | 4.39039100  | 4.17028200  | 1.61935800  |
| C  | 2.84488400  | -4.48162500 | -1.00286900 |
| H  | 5.01025400  | -4.33576100 | -1.08954900 |
| H  | 0.69920900  | -4.34362900 | -0.84421700 |
| H  | 2.82746400  | -5.52386700 | -1.31042400 |
| H  | 1.60597200  | 1.68921900  | 1.92970200  |
| H  | 1.60063100  | 2.59196300  | -0.96022900 |

**H-t (PO + H<sub>2</sub>O-Co<sup>III</sup>-Cl)**

PO + H<sub>2</sub>O-Co<sup>III</sup>-Cl = PG + Co<sup>III</sup>(salen)-Cl

Charge: 0

Spin Multiplicity: 1

Sum of electronic and thermal Free Energies (a.u.): -1908.866311

Thermal correction to Gibbs Free Energy (a.u.): 0.426227

No imaginary frequency

Calculation of single point energy based on the optimized structure, Ep = -3147.5708739 a.u.

|    |             |             |             |
|----|-------------|-------------|-------------|
| C  | -2.19259400 | 0.74069800  | 2.42065100  |
| C  | -1.26119100 | -0.44591200 | 2.62097800  |
| O  | -1.52753800 | 1.95280100  | 2.78219200  |
| H  | -2.46654000 | 0.77702200  | 1.35997800  |
| H  | -1.68493400 | -1.36619200 | 2.21506200  |
| H  | -1.03236100 | -0.57108400 | 3.68564300  |
| C  | -3.45416700 | 0.60814200  | 3.25877300  |
| H  | -4.08637300 | 1.48855100  | 3.11843600  |
| H  | -4.02419400 | -0.27733700 | 2.96056200  |
| H  | -3.20612400 | 0.53282400  | 4.32211500  |
| O  | -0.02391000 | -0.13268800 | 1.93881800  |
| H  | -0.58785700 | 1.80354400  | 2.60674300  |
| H  | 0.65226600  | -0.82512600 | 2.10468300  |
| C  | -4.14834900 | -3.29925000 | -0.80279300 |
| C  | -4.80433200 | -2.20814100 | -1.41342500 |
| C  | -2.85652200 | -3.18834900 | -0.33198500 |
| H  | -4.66797900 | -4.24887900 | -0.70669900 |
| C  | -4.12901300 | -1.01370600 | -1.53187500 |
| H  | -5.81814800 | -2.31232100 | -1.78387100 |
| C  | -2.13135200 | -1.96912500 | -0.44310500 |
| H  | -2.34464900 | -4.02730000 | 0.12690500  |
| C  | -2.80274900 | -0.85970400 | -1.05538300 |
| H  | -4.61017600 | -0.15710900 | -1.99857600 |
| O  | -0.92804400 | -1.92524000 | 0.04176500  |
| C  | -2.18456400 | 0.41783700  | -1.19508400 |
| Co | 0.27782500  | -0.48749100 | -0.09015300 |
| N  | -1.00532800 | 0.74609500  | -0.77197600 |
| H  | -2.78157200 | 1.18012300  | -1.69771600 |
| N  | 1.48012000  | 0.99257600  | -0.06433300 |
| Cl | 0.84979200  | -0.97606800 | -2.18765700 |
| C  | -0.41762500 | 2.05860500  | -1.08656100 |
| C  | 2.76771200  | 0.90111000  | -0.06462900 |
| C  | 0.74880200  | 2.25847300  | -0.10816000 |
| C  | -1.37152100 | 3.25379900  | -0.99931000 |
| H  | 3.35714100  | 1.81352900  | -0.16363700 |
| C  | 3.50412300  | -0.32041900 | 0.07525000  |
| C  | 1.53987100  | 3.52244500  | -0.43727900 |
| C  | -0.61364200 | 4.55367500  | -1.31037200 |
| H  | -1.79583500 | 3.28741800  | 0.01275000  |
| H  | -2.20366600 | 3.14512400  | -1.70125000 |
| C  | 4.90492500  | -0.28756100 | -0.10571700 |
| C  | 2.86368400  | -1.53909800 | 0.46130700  |
| C  | 0.60265500  | 4.73957100  | -0.39503700 |
| H  | 2.35658700  | 3.66238300  | 0.27890000  |
| H  | 1.99065800  | 3.42297300  | -1.43325500 |
| H  | -1.29122300 | 5.40848000  | -1.21500500 |
| H  | -0.28046100 | 4.53137000  | -2.35650200 |
| C  | 5.67772400  | -1.41906900 | 0.06551100  |
| H  | 5.36839000  | 0.65364800  | -0.39234600 |
| C  | 3.67919600  | -2.68085900 | 0.64054900  |
| O  | 1.57685500  | -1.63849900 | 0.70366700  |
| H  | 0.25884600  | 4.88841900  | 0.63688900  |
| H  | 1.15506900  | 5.64225300  | -0.67585800 |
| C  | 5.04745400  | -2.61959500 | 0.44400700  |
| H  | 6.75087200  | -1.38489500 | -0.08740600 |
| H  | 3.18771900  | -3.60442700 | 0.92625800  |
| H  | 5.64406000  | -3.51742900 | 0.58061500  |
| H  | 0.29493200  | 2.38392300  | 0.88403600  |
| H  | 0.00421300  | 1.98282700  | -2.09839300 |

### II-m (PO + H<sub>2</sub>O-Co<sup>III</sup>-Cl)

PO + H<sub>2</sub>O-Co<sup>III</sup>-Cl = PG + Co<sup>III</sup>(salen)-Cl

Charge: 0

Spin Multiplicity: 1

Sum of electronic and thermal Free Energies (a.u.): -1908.776794

Thermal correction to Gibbs Free Energy (a.u.): 0.421278

Imaginary frequencies: -411.84

Calculation of single point energy based on the optimized structure, Et = -3147.4843703 a.u.

|    |             |             |             |
|----|-------------|-------------|-------------|
| C  | -4.54210800 | -2.13410800 | -1.55910500 |
| C  | -5.00770000 | -0.82847900 | -1.82712600 |
| C  | -3.25802500 | -2.35633400 | -1.10546900 |
| H  | -5.20347700 | -2.98129700 | -1.72126100 |
| C  | -4.14520100 | 0.23218900  | -1.64177700 |
| C  | -2.35056800 | -1.28002800 | -0.87688800 |
| C  | -2.82357800 | 0.04619200  | -1.16809800 |
| H  | -4.47538700 | 1.24612700  | -1.85683200 |
| O  | -1.19903700 | -1.55032400 | -0.35691700 |
| C  | -2.00141000 | 1.21124300  | -0.99743300 |
| Co | 0.24923700  | -0.32354800 | -0.13183500 |
| N  | -0.79105400 | 1.22634000  | -0.55573600 |
| H  | -2.45978400 | 2.15553400  | -1.29695900 |
| N  | 1.68853100  | 0.88554200  | 0.15024400  |
| C  | 0.03517700  | 2.44369100  | -0.60684100 |
| C  | 2.93933300  | 0.57287700  | 0.11034800  |
| C  | 1.18410100  | 2.23528900  | 0.39216500  |
| C  | -0.68591200 | 3.76623200  | -0.33747400 |
| H  | 3.68061100  | 1.36872000  | 0.19549700  |
| C  | 3.44816800  | -0.75925800 | -0.01895400 |
| C  | 2.19325900  | 3.38009400  | 0.31976100  |
| C  | 0.31307000  | 4.93225600  | -0.38643500 |
| H  | -1.16531500 | 3.71759400  | 0.64924900  |
| H  | -1.47671400 | 3.93864600  | -1.07408100 |
| C  | 4.83838000  | -0.93560100 | -0.20010500 |
| C  | 2.59100200  | -1.90009800 | 0.10851900  |
| C  | 1.48499100  | 4.71814800  | 0.57847800  |
| H  | 2.98954300  | 3.23439200  | 1.05739200  |
| H  | 2.66434300  | 3.39013600  | -0.67191600 |
| H  | -0.20206500 | 5.87099900  | -0.15651200 |
| H  | 0.69972700  | 5.02794600  | -1.40967300 |
| C  | 5.40173800  | -2.19346800 | -0.27560100 |
| H  | 5.46434300  | -0.04998400 | -0.28636900 |
| C  | 3.20014000  | -3.18012300 | 0.03946700  |
| O  | 1.30823700  | -1.82846600 | 0.33594900  |
| H  | 1.11175400  | 4.73221000  | 1.61121300  |
| H  | 2.20230800  | 5.54117000  | 0.49277900  |
| C  | 4.56189800  | -3.31806900 | -0.15104100 |
| H  | 4.99104800  | -4.31500700 | -0.20998700 |
| H  | 0.73962500  | 2.20976500  | 1.39670900  |
| H  | 0.47873700  | 2.45922300  | -1.61211300 |
| Cl | 0.77779900  | -0.44762900 | -2.34251200 |
| O  | -0.14653600 | -0.20080000 | 1.74866300  |
| H  | 0.50254300  | -0.85474400 | 2.05179000  |
| H  | -0.95828200 | 0.26903200  | 2.84826800  |
| C  | -2.43381000 | -1.34541600 | 2.40892800  |
| C  | -1.95279200 | -1.11897200 | 3.78858600  |
| O  | -1.69414500 | 0.26456000  | 3.58993300  |
| H  | -1.80987700 | -1.83014100 | 1.65811400  |
| H  | -1.06513100 | -1.70007800 | 4.05823400  |
| H  | -2.73312200 | -1.24307400 | 4.54518600  |
| C  | -3.71523000 | -0.80065000 | 1.97357500  |
| H  | -3.55489400 | -0.12115000 | 1.12178700  |
| H  | -4.28959000 | -1.61956400 | 1.51426300  |
| H  | -4.27537100 | -0.30548000 | 2.76675300  |
| H  | 6.46881000  | -2.31576200 | -0.42673000 |
| H  | 2.55017100  | -4.04391400 | 0.12912300  |
| H  | -2.88996300 | -3.35798400 | -0.90910000 |
| H  | -6.01661400 | -0.66640100 | -2.19003600 |

**H-m (PO + H<sub>2</sub>O-Co<sup>III</sup>-Cl)**

PO + H<sub>2</sub>O-Co<sup>III</sup>-Cl = PG + Co<sup>III</sup>(salen)-Cl

Charge: 0

Spin Multiplicity: 1

Sum of electronic and thermal Free Energies (a.u.): -1908.844620

Thermal correction to Gibbs Free Energy (a.u.): 0.423647

No imaginary frequency

Calculation of single point energy based on the optimized structure, Er = -3147.5464894 a.u.

|    |             |             |             |
|----|-------------|-------------|-------------|
| C  | -4.44784100 | -1.68413600 | -1.83735800 |
| C  | -4.81508400 | -0.33989200 | -2.05918600 |
| C  | -3.22604000 | -2.01062700 | -1.28451900 |
| H  | -5.13745400 | -2.47895900 | -2.10923400 |
| C  | -3.91598900 | 0.65319400  | -1.72758300 |
| C  | -2.28306900 | -1.00779600 | -0.91866300 |
| C  | -2.65050600 | 0.35532800  | -1.16794900 |
| H  | -4.16723800 | 1.69673500  | -1.90417700 |
| O  | -1.18189300 | -1.37806300 | -0.34333600 |
| C  | -1.76009900 | 1.44374000  | -0.90719300 |
| Co | 0.35406700  | -0.29232000 | -0.09888100 |
| N  | -0.55474000 | 1.34929700  | -0.45039800 |
| H  | -2.14126600 | 2.43482400  | -1.15866300 |
| N  | 1.87630600  | 0.78374700  | 0.27854000  |
| C  | 0.36521200  | 2.49843200  | -0.44610100 |
| C  | 3.09690200  | 0.36615600  | 0.27444700  |
| C  | 1.47869600  | 2.16356300  | 0.55818800  |
| C  | -0.25140400 | 3.86356100  | -0.13364000 |
| H  | 3.89894300  | 1.09214200  | 0.41456400  |
| C  | 3.49644400  | -1.00086400 | 0.12025900  |
| C  | 2.57944500  | 3.22303400  | 0.53792400  |
| C  | 0.83847600  | 4.94637200  | -0.13120700 |
| H  | -0.74614600 | 3.81750200  | 0.84547600  |
| H  | -1.01677400 | 4.12463900  | -0.87080100 |
| C  | 4.87252900  | -1.28890500 | -0.02155400 |
| C  | 2.54549700  | -2.06880500 | 0.18760600  |
| C  | 1.97861700  | 4.60506200  | 0.83536600  |
| H  | 3.35028400  | 2.98863500  | 1.27966700  |
| H  | 3.06377300  | 3.22649100  | -0.44734300 |
| H  | 0.39783000  | 5.91474200  | 0.12837500  |
| H  | 1.24331700  | 5.04714600  | -1.14688700 |
| C  | 5.33036100  | -2.58793900 | -0.11436300 |
| H  | 5.57308900  | -0.45777100 | -0.06255600 |
| C  | 3.04490800  | -3.39264300 | 0.10228600  |
| O  | 1.26249800  | -1.89278800 | 0.37007200  |
| H  | 1.59643200  | 4.61492700  | 1.86484200  |
| H  | 2.76150700  | 5.36897700  | 0.78410100  |
| C  | 4.39666500  | -3.64054300 | -0.04797100 |
| H  | 4.74286800  | -4.66817200 | -0.12077500 |
| H  | 1.01945200  | 2.14629100  | 1.55688200  |
| H  | 0.82453400  | 2.52026300  | -1.44443400 |
| Cl | 0.91532100  | -0.39124700 | -2.26881900 |
| O  | -0.05023300 | -0.24125500 | 1.86438100  |
| H  | 0.28186600  | -1.14368400 | 2.01841900  |
| H  | -1.03230000 | -0.24320200 | 2.02222400  |
| C  | -3.45714600 | -1.29157100 | 2.11849300  |
| C  | -2.96815900 | -1.14261000 | 3.49476500  |
| O  | -2.62884500 | -0.15608800 | 2.49340600  |
| H  | -2.92858700 | -1.99065900 | 1.47471600  |
| H  | -2.13287200 | -1.74677200 | 3.84584100  |
| H  | -3.63965900 | -0.77828100 | 4.26967100  |
| C  | -4.86766300 | -0.95573500 | 1.72710000  |
| H  | -4.89051700 | -0.51049500 | 0.72988500  |
| H  | -5.47531900 | -1.86621300 | 1.70327700  |
| H  | -5.31061600 | -0.25544700 | 2.44092100  |
| H  | 6.38801800  | -2.79592700 | -0.23457100 |
| H  | 2.32192600  | -4.19994500 | 0.14687900  |
| H  | -2.93583500 | -3.04286500 | -1.11918600 |
| H  | -5.77722500 | -0.09510700 | -2.49544900 |

### H-m (PO + H<sub>2</sub>O-Co<sup>III</sup>-Cl)

PO + H<sub>2</sub>O-Co<sup>III</sup>-Cl = PG + Co<sup>III</sup>(salen)-Cl

Charge: 0

Spin Multiplicity: 1

Sum of electronic and thermal Free Energies (a.u.): -1908.862846

Thermal correction to Gibbs Free Energy (a.u.): 0.426928

No imaginary frequency

Calculation of single point energy based on the optimized structure, Ep = -3147.5697367 a.u.

|   |             |             |             |
|---|-------------|-------------|-------------|
| C | -4.61029100 | -2.66542500 | -0.99851900 |
| C | -5.21535400 | -1.43721900 | -1.34426800 |

|    |             |             |             |
|----|-------------|-------------|-------------|
| C  | -3.27873900 | -2.73593600 | -0.64601900 |
| H  | -5.20292800 | -3.57620000 | -1.01647200 |
| C  | -4.44855100 | -0.29363900 | -1.32126800 |
| C  | -2.45936100 | -1.57303900 | -0.61639100 |
| C  | -3.07811200 | -0.32524300 | -0.95944100 |
| H  | -4.88900600 | 0.66580100  | -1.58317600 |
| O  | -1.21949500 | -1.70634600 | -0.25738600 |
| C  | -2.36199200 | 0.90770400  | -0.93646800 |
| Co | 0.09208000  | -0.36193000 | -0.25342700 |
| N  | -1.12650800 | 1.06550300  | -0.58089900 |
| H  | -2.92757000 | 1.78954100  | -1.24071400 |
| N  | 1.42020100  | 0.99663500  | -0.07648900 |
| C  | -0.43782600 | 2.35662700  | -0.73768300 |
| C  | 2.69061300  | 0.81834400  | -0.21689600 |
| C  | 0.79690700  | 2.29683000  | 0.17466700  |
| C  | -1.27018500 | 3.60474000  | -0.43320700 |
| H  | 3.34696000  | 1.68940100  | -0.20147500 |
| C  | 3.32805000  | -0.45561000 | -0.37931000 |
| C  | 1.67468100  | 3.53577800  | 0.00870600  |
| C  | -0.40591600 | 4.86651900  | -0.57772800 |
| H  | -1.66675300 | 3.52875700  | 0.58782400  |
| H  | -2.12805100 | 3.67568100  | -1.10853000 |
| C  | 4.70542600  | -0.48576000 | -0.69131600 |
| C  | 2.61877400  | -1.67802800 | -0.16624100 |
| C  | 0.85077200  | 4.79946900  | 0.29781900  |
| H  | 2.53382100  | 3.49082800  | 0.68658800  |
| H  | 2.06768600  | 3.56962900  | -1.01583000 |
| H  | -0.99845000 | 5.75158200  | -0.32373700 |
| H  | -0.10924300 | 4.97775600  | -1.62900600 |
| C  | 5.38698600  | -1.68051200 | -0.81580000 |
| H  | 5.22393700  | 0.45846500  | -0.84105800 |
| C  | 3.34132700  | -2.88701200 | -0.29014300 |
| O  | 1.35372000  | -1.73120000 | 0.18683700  |
| H  | 0.55679000  | 4.80147000  | 1.35588400  |
| H  | 1.47002400  | 5.68901500  | 0.14291000  |
| C  | 4.68795400  | -2.88460700 | -0.60944500 |
| H  | 5.21232400  | -3.83136500 | -0.70599600 |
| H  | 0.42873800  | 2.25797000  | 1.21022200  |
| H  | -0.07676100 | 2.39537700  | -1.77496200 |
| Cl | 0.44213200  | -0.49535500 | -2.45131100 |
| O  | 0.02643100  | -0.36109700 | 1.83649000  |
| H  | 0.70003500  | -1.07474900 | 1.74409100  |
| H  | 0.60597100  | 0.31678300  | 4.02329300  |
| C  | -1.09347700 | -0.88069700 | 2.61223200  |
| C  | -0.54124900 | -1.22637600 | 3.99479200  |
| O  | -0.00141200 | -0.09504800 | 4.65404600  |
| H  | -1.46163500 | -1.78329900 | 2.11566200  |
| H  | 0.20840700  | -2.02966000 | 3.89257200  |
| H  | -1.34936200 | -1.61084700 | 4.62518600  |
| C  | -2.16810000 | 0.18859700  | 2.65377900  |
| H  | -2.50051700 | 0.44278200  | 1.64858600  |
| H  | -3.02898000 | -0.18176100 | 3.21802100  |
| H  | -1.79075700 | 1.08362900  | 3.15460700  |
| H  | 6.44190800  | -1.69232200 | -1.06717900 |
| H  | 2.79639500  | -3.81173900 | -0.13513300 |
| H  | -2.80713300 | -3.67901000 | -0.39178100 |
| H  | -6.26210500 | -1.39883100 | -1.62487500 |

### III-t (PO-Co<sup>III</sup>-Cl + H<sub>2</sub>O)

PO-Co<sup>III</sup>-Cl + H<sub>2</sub>O = PG + Co<sup>III</sup>(salen)-Cl

Charge: 0

Spin Multiplicity: 1

Sum of electronic and thermal Free Energies (a.u.): -1908.778325

Thermal correction to Gibbs Free Energy (a.u.): 0.421456

Imaginary frequencies: -382.38

Calculation of single point energy based on the optimized structure, Et = -3147.4855152 a.u.

|   |             |             |             |
|---|-------------|-------------|-------------|
| C | -4.90592200 | -2.32219900 | -0.62976100 |
| C | -5.49478200 | -1.04773500 | -0.49446900 |
| C | -3.53579100 | -2.47393300 | -0.69753000 |

|    |             |             |             |
|----|-------------|-------------|-------------|
| H  | -5.54110400 | -3.20233400 | -0.68651800 |
| C  | -4.67068600 | 0.05690300  | -0.43408100 |
| H  | -6.57288600 | -0.93979200 | -0.44768900 |
| C  | -2.65815900 | -1.35400700 | -0.62678900 |
| H  | -3.07806100 | -3.45093000 | -0.81131900 |
| C  | -3.26166100 | -0.06018000 | -0.48868400 |
| H  | -5.09966900 | 1.05230300  | -0.34045000 |
| O  | -1.38121600 | -1.57555200 | -0.68095200 |
| C  | -2.48656500 | 1.14236800  | -0.43965800 |
| Co | -0.02148100 | -0.29129700 | -0.35868100 |
| N  | -1.19887800 | 1.20874800  | -0.40173200 |
| H  | -3.05551800 | 2.07314000  | -0.44790000 |
| N  | 1.34109500  | 0.98152100  | 0.06809000  |
| C  | -0.45668500 | 2.47111900  | -0.48022300 |
| C  | 2.60994100  | 0.75428100  | -0.00394700 |
| C  | 0.77878800  | 2.29018200  | 0.41786800  |
| C  | -1.22002400 | 3.74630300  | -0.12494400 |
| H  | 3.29868200  | 1.57897800  | 0.18107000  |
| C  | 3.21565400  | -0.50666700 | -0.30700800 |
| C  | 1.71731500  | 3.49279900  | 0.32079000  |
| C  | -0.28420800 | 4.96087700  | -0.21362300 |
| H  | -1.62865500 | 3.65864200  | 0.89122700  |
| H  | -2.06642600 | 3.88866000  | -0.80443400 |
| C  | 4.62281700  | -0.55376000 | -0.44139700 |
| C  | 2.44631900  | -1.70946300 | -0.42998700 |
| C  | 0.95881200  | 4.78302100  | 0.66527600  |
| H  | 2.56514300  | 3.37299800  | 1.00308900  |
| H  | 2.12094200  | 3.55300200  | -0.69809900 |
| H  | -0.82604100 | 5.86840700  | 0.07303700  |
| H  | 0.02694100  | 5.09620300  | -1.25762500 |
| C  | 5.28611800  | -1.73594900 | -0.69881000 |
| H  | 5.18095800  | 0.37448200  | -0.34036100 |
| C  | 3.15727400  | -2.91262700 | -0.68881800 |
| O  | 1.15740600  | -1.77481400 | -0.26416800 |
| H  | 0.65543000  | 4.75064600  | 1.72060900  |
| H  | 1.62679000  | 5.64413700  | 0.55837200  |
| C  | 4.53236300  | -2.92079700 | -0.82014100 |
| H  | 6.36506600  | -1.75492100 | -0.80702000 |
| H  | 2.57177700  | -3.81988600 | -0.79320500 |
| H  | 5.04010100  | -3.85925100 | -1.02713700 |
| C  | -0.63487200 | -1.80172900 | 2.00506500  |
| C  | 0.65563300  | -1.85678700 | 2.68743100  |
| O  | -0.43609200 | -0.47052800 | 1.53298700  |
| H  | -0.65390600 | -2.49036300 | 1.14780300  |
| H  | 1.54097900  | -1.88805800 | 2.06516600  |
| H  | 0.77583900  | -1.95414700 | 3.76075000  |
| C  | -1.88993200 | -1.92739900 | 2.84869100  |
| H  | -2.76424600 | -1.73723200 | 2.22240900  |
| H  | -1.97417700 | -2.93650900 | 3.26660100  |
| H  | -1.88362300 | -1.20287700 | 3.66982700  |
| O  | 1.18088600  | 0.32442300  | 3.32887500  |
| H  | 0.52016800  | 0.32213900  | 2.58252500  |
| H  | 0.67455000  | 0.56320700  | 4.11821300  |
| Cl | 0.37537300  | 0.00624200  | -2.56500600 |
| H  | -0.09411000 | 2.53473800  | -1.51471900 |
| H  | 0.41982300  | 2.21567400  | 1.45531500  |

### III-t (PO-Co<sup>III</sup>-Cl + H<sub>2</sub>O)

PO-Co<sup>III</sup>-Cl + H<sub>2</sub>O = PG + Co<sup>III</sup>(salen)-Cl

Charge: 0

Spin Multiplicity: 1

Sum of electronic and thermal Free Energies (a.u.): -1908.840795

Thermal correction to Gibbs Free Energy (a.u.): 0.423365

No imaginary frequency

Calculation of single point energy based on the optimized structure, Er = -3147.5454006 a.u.

|   |             |             |             |
|---|-------------|-------------|-------------|
| C | -4.53023100 | -2.70269300 | -0.75852100 |
| C | -5.19973500 | -1.46058800 | -0.77412900 |
| C | -3.15191100 | -2.77552600 | -0.74439600 |
| H | -5.10948900 | -3.62225000 | -0.76253500 |
| C | -4.44607200 | -0.30597900 | -0.78277600 |



|    |             |             |             |
|----|-------------|-------------|-------------|
| H  | -6.28308700 | -1.41756100 | -0.79106800 |
| C  | -2.34431900 | -1.60108200 | -0.73238200 |
| H  | -2.63409100 | -3.72879800 | -0.74287300 |
| C  | -3.02991300 | -0.34066800 | -0.75380600 |
| H  | -4.93546100 | 0.66544400  | -0.81384500 |
| O  | -1.05700100 | -1.74382100 | -0.68922300 |
| C  | -2.32780400 | 0.90635100  | -0.76635200 |
| Co | 0.19203000  | -0.36326200 | -0.35491000 |
| N  | -1.05302000 | 1.05230400  | -0.63365200 |
| H  | -2.94373500 | 1.79792700  | -0.88149000 |
| N  | 1.41580000  | 1.00962100  | 0.14784400  |
| C  | -0.39325500 | 2.36300200  | -0.66696100 |
| C  | 2.70044000  | 0.86932100  | 0.19590700  |
| C  | 0.72806200  | 2.28362100  | 0.38469800  |
| C  | -1.28865800 | 3.57648100  | -0.41494000 |
| H  | 3.31401900  | 1.75056800  | 0.38644300  |
| C  | 3.40321100  | -0.36526400 | 0.03229300  |
| C  | 1.58410400  | 3.54854800  | 0.38299500  |
| C  | -0.44559900 | 4.86001000  | -0.39354600 |
| H  | -1.81049700 | 3.43575700  | 0.54044500  |
| H  | -2.04902500 | 3.65903500  | -1.19869400 |
| C  | 4.81739500  | -0.33454900 | -0.00217100 |
| C  | 2.71370900  | -1.61972900 | -0.03493900 |
| C  | 0.69484600  | 4.77704900  | 0.62735900  |
| H  | 2.35577900  | 3.49253200  | 1.15839600  |
| H  | 2.09664100  | 3.63820600  | -0.58365300 |
| H  | -1.08780500 | 5.71924800  | -0.17389000 |
| H  | -0.02402300 | 5.02951600  | -1.39321700 |
| C  | 5.55975700  | -1.49168600 | -0.11147000 |
| H  | 5.31444700  | 0.63133500  | 0.05417700  |
| C  | 3.50427100  | -2.79401700 | -0.13822700 |
| O  | 1.41854300  | -1.74353400 | 0.04674600  |
| H  | 0.27262000  | 4.71809100  | 1.63916300  |
| H  | 1.30379900  | 5.68644900  | 0.59260700  |
| C  | 4.88340400  | -2.72726000 | -0.17729100 |
| H  | 6.64304400  | -1.45447700 | -0.14634800 |
| H  | 2.97950800  | -3.74137300 | -0.19722400 |
| H  | 5.45676400  | -3.64612500 | -0.26633400 |
| C  | -0.65154900 | -1.77264300 | 2.19178200  |
| C  | 0.38095000  | -0.86068300 | 2.69804600  |
| O  | -0.46377000 | -0.44214700 | 1.58521100  |
| H  | -0.30788900 | -2.54448200 | 1.50973700  |
| H  | 1.41313900  | -1.03009200 | 2.41234200  |
| H  | 0.19949300  | -0.27948700 | 3.59855600  |
| C  | -1.98247600 | -1.96318300 | 2.85815000  |
| H  | -2.73823400 | -2.21858200 | 2.10966100  |
| H  | -1.92196100 | -2.78783800 | 3.57584000  |
| H  | -2.29352200 | -1.05397400 | 3.37922200  |
| O  | -2.55588200 | 1.37665400  | 2.30380200  |
| H  | -1.81590000 | 0.82477400  | 2.00147100  |
| H  | -3.31177700 | 0.98881100  | 1.84445400  |
| Cl | 0.82736300  | -0.22155000 | -2.48641600 |
| H  | 0.08604300  | 2.44134100  | -1.65159000 |
| H  | 0.23487100  | 2.19675100  | 1.36431600  |

### III-t (PO-Co<sup>III</sup>-Cl + H<sub>2</sub>O)

PO-Co<sup>III</sup>-Cl + H<sub>2</sub>O = PG + Co<sup>III</sup>(salen)-Cl

Charge: 0

Spin Multiplicity: 1

Sum of electronic and thermal Free Energies (a.u.): -1908.863516

Thermal correction to Gibbs Free Energy (a.u.): 0.427445

No imaginary frequency

Calculation of single point energy based on the optimized structure, Ep = -3147.572434 a.u.

|   |             |             |             |
|---|-------------|-------------|-------------|
| C | -4.80836600 | -2.34221600 | -0.82316900 |
| C | -5.44083800 | -1.12773600 | -0.48205800 |
| C | -3.44039100 | -2.41734700 | -0.98740400 |
| H | -5.40916700 | -3.23703100 | -0.96372500 |
| C | -4.66145500 | -0.00229700 | -0.31884700 |
| H | -6.51750500 | -1.08099800 | -0.36090800 |
| C | -2.60584900 | -1.27612600 | -0.80994500 |

|    |             |             |             |
|----|-------------|-------------|-------------|
| H  | -2.95151600 | -3.34693700 | -1.25885800 |
| C  | -3.25382000 | -0.04339900 | -0.46575300 |
| H  | -5.12378900 | 0.95014700  | -0.06822300 |
| O  | -1.32701300 | -1.42603500 | -0.96388000 |
| C  | -2.52445600 | 1.17636400  | -0.30698700 |
| Co | -0.01438600 | -0.16508800 | -0.45631300 |
| N  | -1.23849500 | 1.28912700  | -0.31363400 |
| H  | -3.12507600 | 2.07818400  | -0.17987500 |
| N  | 1.29244400  | 1.07909300  | 0.18692100  |
| C  | -0.53749100 | 2.57373300  | -0.25141000 |
| C  | 2.57297200  | 0.89631800  | 0.11925600  |
| C  | 0.68656800  | 2.33522800  | 0.65038300  |
| C  | -1.34390900 | 3.78418500  | 0.21557000  |
| H  | 3.23044000  | 1.71560700  | 0.41164600  |
| C  | 3.22352500  | -0.30131900 | -0.30285900 |
| C  | 1.59229600  | 3.56619000  | 0.69033400  |
| C  | -0.44221200 | 5.02659400  | 0.26316700  |
| H  | -1.76445100 | 3.58649900  | 1.21124600  |
| H  | -2.18432800 | 3.96676800  | -0.46191200 |
| C  | 4.63815600  | -0.30106300 | -0.37497700 |
| C  | 2.49306200  | -1.49876200 | -0.60281700 |
| C  | 0.79175400  | 4.79654100  | 1.14308000  |
| H  | 2.43323000  | 3.40580500  | 1.37315100  |
| H  | 2.01039300  | 3.73421500  | -0.31038200 |
| H  | -1.01368700 | 5.88636300  | 0.62832500  |
| H  | -0.11935800 | 5.27289700  | -0.75665100 |
| C  | 5.34305500  | -1.42960900 | -0.73308100 |
| H  | 5.16528900  | 0.62127500  | -0.14101100 |
| C  | 3.24934800  | -2.64880900 | -0.96205600 |
| O  | 1.20241500  | -1.61098500 | -0.52056400 |
| H  | 0.47336500  | 4.65489900  | 2.18485300  |
| H  | 1.43753200  | 5.68073600  | 1.13144900  |
| C  | 4.62729800  | -2.61039100 | -1.02503200 |
| H  | 6.42589500  | -1.41341800 | -0.79012800 |
| H  | 2.69454800  | -3.55085900 | -1.19657900 |
| H  | 5.17043200  | -3.50721300 | -1.31128100 |
| C  | -0.53264600 | -2.07672200 | 1.80101500  |
| C  | 0.77047900  | -2.41262700 | 2.53105800  |
| O  | -0.46144200 | -0.66484600 | 1.45419100  |
| H  | -0.57944500 | -2.61860300 | 0.85650700  |
| H  | 1.59088000  | -2.44182700 | 1.81490100  |
| H  | 0.69676200  | -3.38565100 | 3.03188400  |
| C  | -1.79549000 | -2.29896600 | 2.62044800  |
| H  | -2.66867100 | -1.96448800 | 2.05622700  |
| H  | -1.91765400 | -3.36282100 | 2.84891500  |
| H  | -1.76550800 | -1.74187300 | 3.56487600  |
| O  | 1.10148500  | -1.36652800 | 3.45827300  |
| H  | 0.19020900  | -0.29037700 | 2.07816900  |
| H  | 0.51095100  | -1.43986800 | 4.21988300  |
| Cl | 0.42613600  | 0.41996300  | -2.57404800 |
| H  | -0.15791800 | 2.75499900  | -1.26530300 |
| H  | 0.30153800  | 2.15459500  | 1.66742500  |

### III-m (PO-Co<sup>III</sup>-Cl + H<sub>2</sub>O)

PO-Co<sup>III</sup>-Cl + H<sub>2</sub>O = PG + Co<sup>III</sup>(salen)-Cl

Charge: 0

Spin Multiplicity: 1

Sum of electronic and thermal Free Energies (a.u.): -1908.784816

Thermal correction to Gibbs Free Energy (a.u.): 0.420367

Imaginary frequencies: -274.43

Calculation of single point energy based on the optimized structure, Et = -3147.4955817 a.u.

|   |             |             |             |
|---|-------------|-------------|-------------|
| C | -4.71906500 | -2.86520400 | -0.33612200 |
| C | -5.42406600 | -1.64318900 | -0.32839600 |
| C | -3.34124000 | -2.89595900 | -0.39807100 |
| H | -5.27019400 | -3.80131200 | -0.29769700 |
| C | -4.70622700 | -0.46674600 | -0.38687500 |
| C | -2.57024000 | -1.69832900 | -0.45399300 |
| C | -3.29227700 | -0.45705000 | -0.44179600 |
| H | -5.22648200 | 0.48888000  | -0.39213800 |

|    |             |             |             |
|----|-------------|-------------|-------------|
| O  | -1.28109000 | -1.80726000 | -0.51001600 |
| C  | -2.63518800 | 0.81224400  | -0.51594300 |
| Co | -0.05471100 | -0.37566900 | -0.34897500 |
| N  | -1.35928800 | 1.00334300  | -0.50643400 |
| H  | -3.29076500 | 1.68089300  | -0.59476000 |
| N  | 1.19749900  | 1.04287800  | -0.07158300 |
| C  | -0.73768000 | 2.31981800  | -0.67857600 |
| C  | 2.47653100  | 0.93221600  | -0.19816300 |
| C  | 0.51978800  | 2.31142400  | 0.21088300  |
| C  | -1.61300100 | 3.53818400  | -0.38625800 |
| H  | 3.09086000  | 1.82994500  | -0.11707100 |
| C  | 3.18510500  | -0.29207200 | -0.43248600 |
| C  | 1.33834100  | 3.58856900  | 0.02542100  |
| C  | -0.79770700 | 4.82851800  | -0.55658100 |
| H  | -2.00065500 | 3.47084900  | 0.63953300  |
| H  | -2.47608100 | 3.56106500  | -1.05931600 |
| C  | 4.57952900  | -0.22419500 | -0.65557200 |
| C  | 2.52873100  | -1.56602200 | -0.39777000 |
| C  | 0.46545600  | 4.81900900  | 0.31180100  |
| H  | 2.20505200  | 3.58933300  | 0.69506400  |
| H  | 1.71888200  | 3.62840500  | -1.00347800 |
| H  | -1.42064600 | 5.69553300  | -0.31233100 |
| H  | -0.51141600 | 4.93356700  | -1.61121500 |
| C  | 5.33623700  | -1.36148900 | -0.85264600 |
| H  | 5.05148900  | 0.75581900  | -0.67482400 |
| C  | 3.33405000  | -2.71886200 | -0.59850500 |
| O  | 1.26360500  | -1.72590100 | -0.13559200 |
| H  | 0.17795200  | 4.81628600  | 1.37180500  |
| H  | 1.04708900  | 5.73210200  | 0.14679500  |
| C  | 4.69354800  | -2.61557000 | -0.82042000 |
| H  | 5.27597700  | -3.51939500 | -0.97899700 |
| H  | 0.18337000  | 2.25939700  | 1.25659700  |
| H  | -0.39347900 | 2.35298900  | -1.72094400 |
| Cl | 0.28451900  | -0.25502100 | -2.58402800 |
| O  | -0.34337200 | 1.02792300  | 3.64129700  |
| H  | -1.21506400 | 1.14418200  | 4.04219800  |
| H  | -0.51998000 | 0.70324700  | 2.71397100  |
| C  | 0.44605400  | -1.28654500 | 3.28534700  |
| C  | -0.44851800 | -1.64893200 | 2.17594600  |
| O  | -0.48555500 | -0.39649700 | 1.53443100  |
| H  | 0.09245500  | -1.29209500 | 4.31380000  |
| H  | -1.44150000 | -1.98914600 | 2.49385200  |
| H  | 0.01029700  | -2.40926400 | 1.52160200  |
| C  | 1.85760200  | -0.94579600 | 3.07185200  |
| H  | 2.07536500  | 0.03202300  | 3.51567500  |
| H  | 2.45783100  | -1.67329800 | 3.64269000  |
| H  | 2.13475600  | -0.96718300 | 2.02173600  |
| H  | 6.40383200  | -1.29338000 | -1.03131200 |
| H  | 2.83295200  | -3.68076800 | -0.58157000 |
| H  | -2.79453500 | -3.83284600 | -0.41652600 |
| H  | -6.50774100 | -1.63120900 | -0.28564500 |

### III-m (PO-Co<sup>III</sup>-Cl + H<sub>2</sub>O)

PO-Co<sup>III</sup>-Cl + H<sub>2</sub>O = PG + Co<sup>III</sup>(salen)-Cl

Charge: 0

Spin Multiplicity: 1

Sum of electronic and thermal Free Energies (a.u.): -1908.835694

Thermal correction to Gibbs Free Energy (a.u.): 0.422326

No imaginary frequency

Calculation of single point energy based on the optimized structure, Er = -3147.5408912 a.u.

|   |             |             |             |
|---|-------------|-------------|-------------|
| C | -4.51277400 | -3.10400200 | -0.31008200 |
| C | -5.25792600 | -1.91511500 | -0.46721600 |
| C | -3.13425300 | -3.08691000 | -0.27065400 |
| H | -5.03404900 | -4.05383700 | -0.22414500 |
| C | -4.57826000 | -0.72242000 | -0.58539300 |
| C | -2.40179800 | -1.86941900 | -0.37977200 |
| C | -3.16305700 | -0.66316300 | -0.53942300 |
| H | -5.12672800 | 0.20759400  | -0.72067600 |
| O | -1.10870100 | -1.92832200 | -0.31802500 |
| C | -2.54204000 | 0.61608000  | -0.68026900 |

|    |             |             |             |
|----|-------------|-------------|-------------|
| Co | 0.06936500  | -0.45547400 | -0.26515200 |
| N  | -1.27588200 | 0.85629800  | -0.59221200 |
| H  | -3.21473200 | 1.45253400  | -0.87254200 |
| N  | 1.24789200  | 1.02584300  | -0.04211200 |
| C  | -0.70066500 | 2.18998200  | -0.81267300 |
| C  | 2.53452200  | 0.95996200  | -0.14607800 |
| C  | 0.50685200  | 2.27857200  | 0.13730100  |
| C  | -1.64240400 | 3.37749600  | -0.60800000 |
| H  | 3.10820100  | 1.88726900  | -0.12515400 |
| C  | 3.29057200  | -0.24831100 | -0.26701000 |
| C  | 1.28172200  | 3.57914500  | -0.06220200 |
| C  | -0.87648400 | 4.69630000  | -0.78917700 |
| H  | -2.06764400 | 3.31140400  | 0.40077200  |
| H  | -2.46804100 | 3.34009800  | -1.32648100 |
| C  | 4.68494800  | -0.15011300 | -0.48414500 |
| C  | 2.68034300  | -1.53605500 | -0.11188000 |
| C  | 0.34255900  | 4.77827800  | 0.13668500  |
| H  | 2.11636000  | 3.64099500  | 0.64491000  |
| H  | 1.70785900  | 3.59809500  | -1.07386400 |
| H  | -1.54850300 | 5.54105100  | -0.60469600 |
| H  | -0.54433500 | 4.78054600  | -1.83255200 |
| C  | 5.48226400  | -1.27295400 | -0.56170600 |
| H  | 5.12168900  | 0.83989800  | -0.59518700 |
| C  | 3.52769800  | -2.67236200 | -0.18544300 |
| O  | 1.41584800  | -1.71523900 | 0.15036900  |
| H  | 0.00430400  | 4.79951700  | 1.18079200  |
| H  | 0.89106400  | 5.70996900  | -0.03742600 |
| C  | 4.88482100  | -2.54063900 | -0.40671000 |
| H  | 5.50170600  | -3.43324500 | -0.46757400 |
| H  | 0.10233800  | 2.26410200  | 1.15953200  |
| H  | -0.31001400 | 2.18905900  | -1.83913800 |
| Cl | 0.49088600  | -0.53517300 | -2.45025400 |
| O  | -2.22059700 | 1.73829100  | 2.41893800  |
| H  | -3.17020100 | 1.61301200  | 2.30430500  |
| H  | -1.82266400 | 0.96129600  | 1.99096200  |
| C  | 0.18709600  | -0.39072400 | 3.02806300  |
| C  | -0.44997300 | -1.60646900 | 2.50153700  |
| O  | -0.50932100 | -0.37474500 | 1.73152100  |
| H  | -0.38494300 | 0.19929400  | 3.74250200  |
| H  | -1.41968800 | -1.92806900 | 2.87016800  |
| H  | 0.17016300  | -2.35642100 | 2.02024300  |
| C  | 1.67277200  | -0.18635000 | 3.04411500  |
| H  | 1.91982000  | 0.86355100  | 2.86473900  |
| H  | 2.05284700  | -0.45605600 | 4.03538100  |
| H  | 2.16445500  | -0.80194400 | 2.29381800  |
| H  | 6.54874300  | -1.18473400 | -0.73783300 |
| H  | 3.06230300  | -3.64562200 | -0.07345700 |
| H  | -2.55793500 | -3.99949200 | -0.16196600 |
| H  | -6.34141000 | -1.94382000 | -0.50337900 |

### III-m (PO-Co<sup>III</sup>-Cl + H<sub>2</sub>O)

PO-Co<sup>III</sup>-Cl + H<sub>2</sub>O = PG + Co<sup>III</sup>(salen)-Cl

Charge: 0

Spin Multiplicity: 1

Sum of electronic and thermal Free Energies (a.u.): -1908.859912

Thermal correction to Gibbs Free Energy (a.u.): 0.427643

No imaginary frequency

Calculation of single point energy based on the optimized structure, E<sub>p</sub> = -3147.5705219 a.u.

|    |             |             |             |
|----|-------------|-------------|-------------|
| C  | -4.67925300 | -2.86914100 | -0.58824100 |
| C  | -5.42144300 | -1.70097500 | -0.30903700 |
| C  | -3.31037900 | -2.82805100 | -0.75016500 |
| H  | -5.19608100 | -3.82068900 | -0.68305000 |
| C  | -4.74876600 | -0.50315000 | -0.20349100 |
| C  | -2.58326200 | -1.60746500 | -0.63571500 |
| C  | -3.34210300 | -0.42221100 | -0.35219500 |
| H  | -5.29685400 | 0.41467700  | -0.00089500 |
| O  | -1.29839200 | -1.64824600 | -0.79517300 |
| C  | -2.73198000 | 0.86576500  | -0.25750300 |
| Co | -0.10963200 | -0.23012800 | -0.43179500 |
| N  | -1.46213600 | 1.10397100  | -0.28995000 |

|    |             |             |             |
|----|-------------|-------------|-------------|
| H  | -3.41574200 | 1.71027300  | -0.15940500 |
| N  | 1.10154900  | 1.16833900  | 0.06395900  |
| C  | -0.89225100 | 2.45381700  | -0.30945500 |
| C  | 2.38315000  | 1.12321000  | -0.11822400 |
| C  | 0.39930200  | 2.37263600  | 0.52420000  |
| C  | -1.79074100 | 3.59307000  | 0.17011400  |
| H  | 2.96855000  | 2.02184200  | 0.07893200  |
| C  | 3.12205100  | -0.01911300 | -0.55022600 |
| C  | 1.17446100  | 3.68921100  | 0.47760600  |
| C  | -1.01960600 | 4.92100800  | 0.13432900  |
| H  | -2.13542000 | 3.38491500  | 1.19245600  |
| H  | -2.68048400 | 3.67002200  | -0.46291800 |
| C  | 4.51540100  | 0.12644300  | -0.75887300 |
| C  | 2.50464600  | -1.30301800 | -0.71675200 |
| C  | 0.27816800  | 4.84505200  | 0.94653500  |
| H  | 2.06568400  | 3.63491500  | 1.11168500  |
| H  | 1.51409800  | 3.86857100  | -0.55049200 |
| H  | -1.65559400 | 5.72946500  | 0.50984700  |
| H  | -0.78037500 | 5.16686500  | -0.90841600 |
| C  | 5.30528400  | -0.94142500 | -1.12572500 |
| H  | 4.95642200  | 1.11161100  | -0.62345100 |
| C  | 3.34721500  | -2.38645200 | -1.08872500 |
| O  | 1.24901300  | -1.54419700 | -0.49555400 |
| H  | 0.03458600  | 4.70354800  | 2.00826400  |
| H  | 0.82739300  | 5.78960900  | 0.87528700  |
| C  | 4.70105100  | -2.20674000 | -1.28685100 |
| H  | 5.31216200  | -3.05693000 | -1.57829300 |
| H  | 0.09433400  | 2.19145600  | 1.56842800  |
| H  | -0.59043500 | 2.63785000  | -1.34892900 |
| Cl | 0.14682900  | 0.27734400  | -2.59682500 |
| O  | 0.50633700  | -0.88268700 | 3.96736200  |
| H  | -0.30451500 | -1.09337300 | 4.45106300  |
| H  | -0.11859300 | -0.10257800 | 2.20683200  |
| C  | 0.81315100  | -1.99309500 | 3.09646400  |
| C  | -0.24449900 | -2.03450400 | 1.98973600  |
| O  | -0.46262800 | -0.69247100 | 1.51221600  |
| H  | 0.76792800  | -2.93707000 | 3.65734200  |
| H  | -1.20157700 | -2.40679900 | 2.37537800  |
| H  | 0.06463300  | -2.63834500 | 1.13742800  |
| C  | 2.22820700  | -1.76015900 | 2.59426500  |
| H  | 2.91968500  | -1.72011100 | 3.43936400  |
| H  | 2.53355700  | -2.55880300 | 1.91548100  |
| H  | 2.29303500  | -0.81810900 | 2.04663500  |
| H  | 6.36994400  | -0.81474500 | -1.28857000 |
| H  | 2.87693100  | -3.35490300 | -1.22083200 |
| H  | -2.73821700 | -3.72153400 | -0.97614000 |
| H  | -6.49841700 | -1.74667400 | -0.18981400 |

#### IV-t (PO-Co<sup>III</sup>-Cl + H<sub>2</sub>O-Co<sup>III</sup>-Cl)

PO-Co<sup>III</sup>-Cl + H<sub>2</sub>O-Co<sup>III</sup>-Cl = PG + 2Co<sup>III</sup>(salen)-Cl

Charge: 0

Spin Multiplicity: 1

Sum of electronic and thermal Free Energies (a.u.): -3548.156311

Thermal correction to Gibbs Free Energy (a.u.): 0.769711

Imaginary frequencies: -384.92

Calculation of single point energy based on the optimized structure, Et = -6025.3483821 a.u.

|   |             |            |             |
|---|-------------|------------|-------------|
| C | 1.17380300  | 1.51447200 | -1.78326900 |
| C | 0.27651800  | 2.29099100 | -0.91828100 |
| O | 1.29645300  | 0.44381300 | -0.84703300 |
| H | 0.62915400  | 1.12897600 | -2.64903100 |
| H | -0.76268100 | 2.49133500 | -1.17788500 |
| H | 0.71915000  | 2.65879300 | 0.00626000  |
| C | 2.44784000  | 2.21160300 | -2.23973000 |
| H | 3.10107600  | 1.47893800 | -2.72139200 |
| H | 2.19420800  | 2.97521700 | -2.98259000 |
| H | 2.98055800  | 2.68003400 | -1.41553800 |
| O | -1.01058400 | 0.57192400 | -0.00461300 |
| H | -0.15986700 | 0.18859600 | -0.39697400 |
| H | -0.77711500 | 0.66693600 | 0.94190900  |

|    |             |             |             |
|----|-------------|-------------|-------------|
| C  | 0.75556900  | -2.33345800 | -4.20423200 |
| C  | 0.63120100  | -3.53319300 | -3.47275100 |
| C  | 0.03163600  | -1.20920900 | -3.86223600 |
| H  | 1.41873700  | -2.29692600 | -5.06476800 |
| C  | -0.23401500 | -3.56226300 | -2.39715500 |
| H  | 1.19075500  | -4.41669300 | -3.76032900 |
| C  | -0.86143400 | -1.20399200 | -2.75060100 |
| H  | 0.10023500  | -0.29749700 | -4.44628500 |
| C  | -0.98175100 | -2.42641300 | -2.00956400 |
| H  | -0.36019300 | -4.47909700 | -1.82518300 |
| O  | -1.49096200 | -0.10504900 | -2.47471400 |
| C  | -1.89754700 | -2.56887000 | -0.91686300 |
| Co | -2.67297300 | 0.18120100  | -1.00719700 |
| N  | -2.64783900 | -1.63879100 | -0.43270100 |
| H  | -1.97033300 | -3.56820700 | -0.48654200 |
| N  | -3.73089500 | 0.50084900  | 0.54594700  |
| Cl | -4.50107500 | -0.25979800 | -2.22225300 |
| C  | -3.68438500 | -1.89318300 | 0.57600100  |
| C  | -4.45317000 | 1.55503100  | 0.73896400  |
| C  | -3.71194100 | -0.64340000 | 1.46865000  |
| C  | -3.54725200 | -3.17126400 | 1.40024500  |
| H  | -5.09482900 | 1.58838400  | 1.61979600  |
| C  | -4.48938300 | 2.71038300  | -0.10332900 |
| C  | -4.84674800 | -0.71693500 | 2.48978800  |
| C  | -4.68414200 | -3.25151300 | 2.43018000  |
| H  | -2.57740200 | -3.17687300 | 1.91111700  |
| H  | -3.58710400 | -4.05073900 | 0.74879200  |
| C  | -5.41352900 | 3.73499400  | 0.20924400  |
| C  | -3.59057100 | 2.87284600  | -1.20558600 |
| C  | -4.73048600 | -2.00422000 | 3.31941500  |
| H  | -4.81851200 | 0.15127500  | 3.15696100  |
| H  | -5.80897000 | -0.69368500 | 1.96156500  |
| H  | -4.56045500 | -4.14911100 | 3.04540700  |
| H  | -5.64119400 | -3.35999500 | 1.90300200  |
| C  | -5.48070600 | 4.89703200  | -0.53098000 |
| H  | -6.08195200 | 3.58618200  | 1.05433400  |
| C  | -3.67745500 | 4.08158100  | -1.94522400 |
| O  | -2.67576500 | 2.00573800  | -1.53691000 |
| H  | -3.81564500 | -1.95909700 | 3.92075200  |
| H  | -5.57054100 | -2.06707700 | 4.01922100  |
| C  | -4.59604200 | 5.05946400  | -1.61618600 |
| H  | -6.19908800 | 5.67117800  | -0.28471700 |
| H  | -3.00466200 | 4.19788500  | -2.78835300 |
| H  | -4.63954700 | 5.96828900  | -2.21051400 |
| C  | -1.16954900 | -1.37391000 | 4.38350300  |
| C  | -0.91295300 | -2.72292000 | 4.07789000  |
| C  | -0.59065900 | -0.35234500 | 3.65021700  |
| H  | -1.82475900 | -1.12599200 | 5.21413000  |
| C  | -0.05248000 | -3.01371000 | 3.03452000  |
| H  | -1.36850400 | -3.51749200 | 4.65844200  |
| C  | 0.30074500  | -0.62465600 | 2.58049000  |
| H  | -0.77337100 | 0.68977700  | 3.89112300  |
| C  | 0.57196600  | -1.99570200 | 2.28100900  |
| H  | 0.17535700  | -4.04892300 | 2.79084900  |
| O  | 0.77250900  | 0.38289700  | 1.89061300  |
| C  | 1.53056500  | -2.39329500 | 1.28660100  |
| Co | 2.38223900  | 0.30261300  | 0.81637300  |
| N  | 2.29889800  | -1.60725300 | 0.61588200  |
| H  | 1.64737300  | -3.46992100 | 1.15175500  |
| N  | 3.92395400  | 0.20610900  | -0.27696600 |
| C  | 3.44699900  | -2.13190900 | -0.14690900 |
| C  | 4.88929400  | 1.06088900  | -0.26357000 |
| C  | 3.88816000  | -1.00701200 | -1.09248900 |
| C  | 3.20905400  | -3.43192100 | -0.91477500 |
| H  | 5.78141900  | 0.85144200  | -0.85524100 |
| C  | 4.86710600  | 2.30505300  | 0.44706000  |
| C  | 5.15525500  | -1.37810000 | -1.85636800 |
| C  | 4.45962300  | -3.81249200 | -1.72168700 |
| H  | 2.35382000  | -3.29754000 | -1.58431500 |

|    |             |             |             |
|----|-------------|-------------|-------------|
| H  | 2.96212500  | -4.24873300 | -0.22863900 |
| C  | 6.04602400  | 3.08437200  | 0.47703400  |
| C  | 3.66549900  | 2.80320400  | 1.05020500  |
| C  | 4.90928600  | -2.67354200 | -2.64477800 |
| H  | 5.43805200  | -0.56998200 | -2.54031500 |
| H  | 5.98740100  | -1.51804500 | -1.15367700 |
| H  | 4.25572500  | -4.71512100 | -2.30751400 |
| H  | 5.27678000  | -4.06283600 | -1.03189300 |
| C  | 6.07760200  | 4.32033000  | 1.09005100  |
| H  | 6.94116400  | 2.68438300  | 0.00616400  |
| C  | 3.72456400  | 4.08184700  | 1.65967300  |
| O  | 2.51845600  | 2.17781500  | 1.01715100  |
| H  | 4.13151100  | -2.49131000 | -3.39802500 |
| H  | 5.81712000  | -2.95807200 | -3.18681200 |
| C  | 4.89735300  | 4.81304800  | 1.68073500  |
| H  | 6.99145200  | 4.90367000  | 1.11517600  |
| H  | 2.81666300  | 4.45507000  | 2.12128700  |
| H  | 4.90770500  | 5.78475600  | 2.16710400  |
| Cl | 3.63091300  | -0.06518400 | 2.66375300  |
| H  | 4.25178100  | -2.27052100 | 0.58894200  |
| H  | 3.06992500  | -0.86004600 | -1.81014900 |
| H  | -4.63139500 | -1.91261300 | 0.02045400  |
| H  | -2.75504400 | -0.60705500 | 2.00834200  |

**IV-t (PO-Co<sup>III</sup>-Cl + H<sub>2</sub>O-Co<sup>III</sup>-Cl)**

PO-Co<sup>III</sup>-Cl + H<sub>2</sub>O-Co<sup>III</sup>-Cl = PG + 2Co<sup>III</sup>(salen)-Cl

Charge: 0

Spin Multiplicity: 1

Sum of electronic and thermal Free Energies (a.u.): -3548.217020

Thermal correction to Gibbs Free Energy (a.u.): 0.771611

No imaginary frequency

Calculation of single point energy based on the optimized structure, Er = -6025.4125713 a.u.

|    |             |             |             |
|----|-------------|-------------|-------------|
| C  | 1.45353500  | 0.44593400  | -2.28235800 |
| C  | 1.29891800  | 1.75781800  | -1.65034800 |
| O  | 1.31672300  | 0.55481100  | -0.80287700 |
| H  | 0.54279300  | 0.00201800  | -2.68023900 |
| H  | 0.32960300  | 2.23601000  | -1.66292600 |
| H  | 2.17702200  | 2.37032700  | -1.47949200 |
| C  | 2.75786900  | -0.06425500 | -2.81467000 |
| H  | 2.83886200  | -1.14442100 | -2.66181600 |
| H  | 2.78642000  | 0.12100500  | -3.89415900 |
| H  | 3.60841800  | 0.43275900  | -2.35059800 |
| O  | -1.04281400 | -0.25658700 | 0.13588000  |
| H  | -0.19619700 | -0.00051500 | -0.31457100 |
| H  | -1.16786800 | 0.43889300  | 0.80289800  |
| C  | 0.54279600  | -4.19696900 | -2.81218500 |
| C  | -0.06980100 | -5.09818500 | -1.91761700 |
| C  | 0.10529200  | -2.89190700 | -2.92580500 |
| H  | 1.36736700  | -4.53594900 | -3.43388800 |
| C  | -1.12508800 | -4.64764300 | -1.14927600 |
| H  | 0.27304400  | -6.12428500 | -1.84447000 |
| C  | -0.97966900 | -2.39475400 | -2.14477600 |
| H  | 0.55702100  | -2.21209300 | -3.63984000 |
| C  | -1.59388700 | -3.31622800 | -1.23172500 |
| H  | -1.62376500 | -5.32551800 | -0.45988100 |
| O  | -1.34420600 | -1.16132500 | -2.31185400 |
| C  | -2.72360200 | -2.95416000 | -0.42540000 |
| Co | -2.52215600 | -0.20663500 | -1.15561100 |
| N  | -3.23248900 | -1.77470800 | -0.33216400 |
| H  | -3.18056400 | -3.76582500 | 0.14240800  |
| N  | -3.55586700 | 0.74938500  | 0.13741900  |
| Cl | -4.22874700 | -0.20226400 | -2.61230700 |
| C  | -4.41954500 | -1.46441300 | 0.46931900  |
| C  | -3.76622800 | 2.02580400  | 0.12716000  |
| C  | -4.09522500 | -0.13689800 | 1.17541800  |
| C  | -4.88078400 | -2.52651700 | 1.46493200  |
| H  | -4.40785600 | 2.45058200  | 0.89801400  |
| C  | -3.21886200 | 2.95334000  | -0.80864100 |
| C  | -5.29082300 | 0.38533400  | 1.97049600  |
| C  | -6.08746700 | -2.00862400 | 2.26156200  |

|    |             |             |             |
|----|-------------|-------------|-------------|
| H  | -4.05807800 | -2.77041500 | 2.15146400  |
| H  | -5.15222500 | -3.44883500 | 0.94083400  |
| C  | -3.60774000 | 4.31000000  | -0.70359200 |
| C  | -2.25593400 | 2.55963100  | -1.79264300 |
| C  | -5.77168000 | -0.68289700 | 2.96335400  |
| H  | -5.01615100 | 1.29391100  | 2.51591200  |
| H  | -6.09823200 | 0.64868800  | 1.27547000  |
| H  | -6.39929700 | -2.76121800 | 2.99319900  |
| H  | -6.93337900 | -1.86462900 | 1.57707400  |
| C  | -3.09274700 | 5.27672000  | -1.54100500 |
| H  | -4.33318400 | 4.57900700  | 0.06093700  |
| C  | -1.75677800 | 3.57516400  | -2.65398100 |
| O  | -1.77255400 | 1.35775100  | -1.91136000 |
| H  | -4.99099300 | -0.84931600 | 3.71831000  |
| H  | -6.65263300 | -0.31719900 | 3.50083600  |
| C  | -2.16058500 | 4.88960500  | -2.52551900 |
| H  | -3.40198800 | 6.31215400  | -1.45124700 |
| H  | -1.05348200 | 3.27381700  | -3.42292700 |
| H  | -1.75502400 | 5.63728800  | -3.20177900 |
| C  | -1.50329500 | 3.60864500  | 2.38952200  |
| C  | -2.04174200 | 2.55162500  | 3.15835200  |
| C  | -0.28935100 | 3.48415900  | 1.74941000  |
| H  | -2.05688900 | 4.53823100  | 2.29371000  |
| C  | -1.33589500 | 1.36993000  | 3.24191400  |
| H  | -2.98563500 | 2.67211300  | 3.67912700  |
| C  | 0.47471400  | 2.28072400  | 1.82233600  |
| H  | 0.12452900  | 4.29555000  | 1.16122600  |
| C  | -0.09888400 | 1.19238100  | 2.56790600  |
| H  | -1.72924200 | 0.53644800  | 3.82018200  |
| O  | 1.60642700  | 2.23133100  | 1.20196300  |
| C  | 0.48439300  | -0.11790200 | 2.56942600  |
| Co | 2.62490800  | 0.67091300  | 0.84501500  |
| N  | 1.47754900  | -0.49715900 | 1.84002900  |
| H  | -0.01828700 | -0.85900800 | 3.19167500  |
| N  | 3.53307800  | -0.90985700 | 0.31759200  |
| C  | 1.98272800  | -1.87889300 | 1.87047200  |
| C  | 4.75764300  | -0.95635100 | -0.09409600 |
| C  | 2.69865000  | -2.09553500 | 0.52751200  |
| C  | 0.93292600  | -2.97134300 | 2.09065400  |
| H  | 5.21318300  | -1.93212100 | -0.26415100 |
| C  | 5.57360800  | 0.18231700  | -0.37697600 |
| C  | 3.39853400  | -3.45243500 | 0.48953400  |
| C  | 1.59986000  | -4.35457400 | 2.04469600  |
| H  | 0.16539000  | -2.88821200 | 1.31067600  |
| H  | 0.43539700  | -2.84531400 | 3.05756900  |
| C  | 6.93119600  | -0.02668500 | -0.71688700 |
| C  | 5.03064500  | 1.50802200  | -0.38623700 |
| C  | 2.37814000  | -4.57166000 | 0.74221600  |
| H  | 3.87754600  | -3.60727700 | -0.48337900 |
| H  | 4.18829000  | -3.47469700 | 1.25205000  |
| H  | 0.83779700  | -5.13294700 | 2.15900700  |
| H  | 2.28057500  | -4.45163600 | 2.90103600  |
| C  | 7.75840200  | 1.02505500  | -1.04981800 |
| H  | 7.31564100  | -1.04406900 | -0.70619300 |
| C  | 5.90284800  | 2.56939400  | -0.74221800 |
| O  | 3.77979500  | 1.78386600  | -0.14335200 |
| H  | 1.67344300  | -4.60676500 | -0.09528900 |
| H  | 2.89185800  | -5.53876900 | 0.76594800  |
| C  | 7.22535500  | 2.33078200  | -1.06079600 |
| H  | 8.79956100  | 0.85383000  | -1.30030000 |
| H  | 5.49019600  | 3.57236000  | -0.74226000 |
| H  | 7.86781800  | 3.16787100  | -1.32029400 |
| Cl | 3.87455100  | 0.86322300  | 2.68117300  |
| H  | 2.74476300  | -1.92021500 | 2.66048800  |
| H  | 1.92775400  | -2.07856900 | -0.25787500 |
| H  | -5.22030700 | -1.26091900 | -0.25303600 |
| H  | -3.27347200 | -0.33766400 | 1.88084300  |

**IV-t (PO-Co<sup>III</sup>-Cl + H<sub>2</sub>O-Co<sup>III</sup>-Cl)**

PO-Co<sup>III</sup>-Cl + H<sub>2</sub>O-Co<sup>III</sup>-Cl = PG + 2Co<sup>III</sup>(salen)-Cl



Charge: 0

Spin Multiplicity: 1

Sum of electronic and thermal Free Energies (a.u.): -3548.260459

Thermal correction to Gibbs Free Energy (a.u.): 0.778490

No imaginary frequency

Calculation of single point energy based on the optimized structure, Ep = -6025.4560489 a.u.

|    |             |             |             |
|----|-------------|-------------|-------------|
| C  | 0.42571900  | 2.08962900  | -0.76689900 |
| C  | -0.47221700 | 2.14979000  | 0.47438800  |
| O  | 1.16001700  | 0.83709200  | -0.80651900 |
| H  | -0.21869200 | 2.05744200  | -1.64477900 |
| H  | -1.24723600 | 2.90264900  | 0.32361000  |
| H  | 0.11724200  | 2.37575600  | 1.36302900  |
| C  | 1.37342800  | 3.26994300  | -0.86514500 |
| H  | 1.99284600  | 3.17941800  | -1.76186900 |
| H  | 0.79170000  | 4.19363100  | -0.95120500 |
| H  | 2.02169500  | 3.35008000  | 0.00620500  |
| O  | -1.14724900 | 0.90028500  | 0.72116500  |
| H  | 0.48370700  | 0.15879000  | -1.08339600 |
| H  | -0.45996600 | 0.23618900  | 1.02213000  |
| C  | 0.31892400  | -3.66790800 | -2.98405200 |
| C  | -0.31281300 | -4.65897900 | -2.21270000 |
| C  | 0.08306200  | -2.32362100 | -2.75012800 |
| H  | 0.99307300  | -3.95746700 | -3.78589300 |
| C  | -1.17678700 | -4.26722600 | -1.20667000 |
| H  | -0.13178000 | -5.71022300 | -2.40837600 |
| C  | -0.79588900 | -1.90084200 | -1.72681200 |
| H  | 0.54941900  | -1.55339900 | -3.35460000 |
| C  | -1.43248100 | -2.90576400 | -0.94037100 |
| H  | -1.66711500 | -5.01331700 | -0.58822200 |
| O  | -0.94905000 | -0.61256900 | -1.52259400 |
| C  | -2.32749800 | -2.58989000 | 0.13484900  |
| Co | -2.46313100 | 0.15627900  | -0.61196900 |
| N  | -2.74233800 | -1.41178600 | 0.45890000  |
| H  | -2.70315300 | -3.44507700 | 0.69714500  |
| N  | -3.82106700 | 0.95360100  | 0.44527600  |
| Cl | -3.98676900 | -0.68912800 | -2.03462700 |
| C  | -3.86777900 | -1.24536800 | 1.39746400  |
| C  | -4.53517200 | 1.97425700  | 0.10524900  |
| C  | -3.95352600 | 0.25109900  | 1.72324200  |
| C  | -3.81133200 | -2.07268800 | 2.68378000  |
| H  | -5.33254400 | 2.29677600  | 0.77559700  |
| C  | -4.35746200 | 2.74518000  | -1.08541800 |
| C  | -5.19368800 | 0.56020600  | 2.56061400  |
| C  | -5.04830200 | -1.77881200 | 3.54475700  |
| H  | -2.89901500 | -1.81717900 | 3.23305700  |
| H  | -3.75992800 | -3.14258500 | 2.46090600  |
| C  | -5.29563900 | 3.76178400  | -1.37955700 |
| C  | -3.22291400 | 2.55049300  | -1.93638100 |
| C  | -5.18002300 | -0.28094700 | 3.84645400  |
| H  | -5.22739500 | 1.62423100  | 2.81754600  |
| H  | -6.09465300 | 0.33601200  | 1.97450600  |
| H  | -4.99544200 | -2.34954000 | 4.47785600  |
| H  | -5.94627800 | -2.12334700 | 3.01479400  |
| C  | -5.15369300 | 4.57431300  | -2.48512300 |
| H  | -6.14424700 | 3.89009400  | -0.71126300 |
| C  | -3.09798100 | 3.40706400  | -3.06199100 |
| O  | -2.28356600 | 1.67757400  | -1.71317300 |
| H  | -4.33588000 | 0.03699400  | 4.47256200  |
| H  | -6.08969600 | -0.08736900 | 4.42433300  |
| C  | -4.03729100 | 4.38481400  | -3.32523200 |
| H  | -5.88430400 | 5.34496500  | -2.70510100 |
| H  | -2.24297500 | 3.25321500  | -3.71160300 |
| H  | -3.91361300 | 5.01712600  | -4.20046800 |
| C  | -0.40459000 | -3.77487100 | 2.81477300  |
| C  | 0.22733500  | -4.74239000 | 2.01481800  |
| C  | -0.17360800 | -2.42388500 | 2.61595300  |
| H  | -1.07546000 | -4.08809700 | 3.61036000  |
| C  | 1.09319900  | -4.32128400 | 1.02192900  |
| H  | 0.04846400  | -5.79905500 | 2.18108000  |

|    |             |             |             |
|----|-------------|-------------|-------------|
| C  | 0.69811700  | -1.97161600 | 1.60156800  |
| H  | -0.63913700 | -1.67062600 | 3.24135100  |
| C  | 1.34747800  | -2.95272400 | 0.79570700  |
| H  | 1.59000900  | -5.04914400 | 0.38713000  |
| O  | 0.84473300  | -0.67755300 | 1.42531100  |
| C  | 2.27061100  | -2.60594400 | -0.24644700 |
| Co | 2.39632500  | 0.10531200  | 0.61499800  |
| N  | 2.71355600  | -1.42143000 | -0.50163100 |
| H  | 2.64964500  | -3.44143500 | -0.83599900 |
| N  | 3.82701600  | 0.91870700  | -0.32314300 |
| C  | 3.86366000  | -1.22466800 | -1.40200000 |
| C  | 4.55527300  | 1.88459300  | 0.12685800  |
| C  | 4.00177400  | 0.28713400  | -1.63068300 |
| C  | 3.80874700  | -1.96029500 | -2.74281200 |
| H  | 5.40508500  | 2.21877000  | -0.46962800 |
| C  | 4.32261100  | 2.58222300  | 1.35411700  |
| C  | 5.28129300  | 0.60722200  | -2.40074000 |
| C  | 5.07654100  | -1.65245800 | -3.55360900 |
| H  | 2.91682700  | -1.63535000 | -3.29036800 |
| H  | 3.71554000  | -3.04045100 | -2.59529400 |
| C  | 5.28102900  | 3.52896200  | 1.78426600  |
| C  | 3.11806000  | 2.39061800  | 2.10701600  |
| C  | 5.27725400  | -0.14305800 | -3.74235300 |
| H  | 5.36063700  | 1.68461600  | -2.58114800 |
| H  | 6.15369000  | 0.31003300  | -1.80402300 |
| H  | 5.02540100  | -2.15089300 | -4.52731500 |
| H  | 5.94657500  | -2.07148300 | -3.03073800 |
| C  | 5.09424400  | 4.27322500  | 2.93053800  |
| H  | 6.18241400  | 3.65757100  | 1.18920600  |
| C  | 2.94849100  | 3.17903100  | 3.27494500  |
| O  | 2.15344900  | 1.58917700  | 1.75227000  |
| H  | 4.46724100  | 0.25310600  | -4.36892300 |
| H  | 6.21200900  | 0.05129900  | -4.27838700 |
| C  | 3.91007000  | 4.08753500  | 3.67249900  |
| H  | 5.84121100  | 4.98933200  | 3.25507700  |
| H  | 2.03943900  | 3.02921700  | 3.84744600  |
| H  | 3.74992900  | 4.66731000  | 4.57765400  |
| Cl | 3.82661600  | -0.81197000 | 2.08976300  |
| H  | 4.75004400  | -1.55094100 | -0.83939200 |
| H  | 3.13669200  | 0.60386700  | -2.22826800 |
| H  | -4.77382900 | -1.50649600 | 0.83235800  |
| H  | -3.05607000 | 0.51172600  | 2.30080300  |

#### IV-m (PO-Co<sup>III</sup>-Cl + H<sub>2</sub>O-Co<sup>III</sup>-Cl)

PO-Co<sup>III</sup>-Cl + H<sub>2</sub>O-Co<sup>III</sup>-Cl = PG + 2Co<sup>III</sup>(salen)-Cl

Charge: 0

Spin Multiplicity: 1

Sum of electronic and thermal Free Energies (a.u.): -3548.162706

Thermal correction to Gibbs Free Energy (a.u.): 0.770148

Imaginary frequencies: -261.98

Calculation of single point energy based on the optimized structure, Et = -6025.3545631 a.u.

|   |             |             |             |
|---|-------------|-------------|-------------|
| N | -2.31690700 | 1.50967200  | -0.36802200 |
| N | -3.72287500 | -0.59853300 | 0.14509600  |
| C | -1.59602700 | 2.48881000  | -0.79912000 |
| H | -1.62431100 | 3.42829100  | -0.24508500 |
| C | -4.11335200 | -1.78965100 | 0.45371600  |
| H | -4.80647800 | -1.90623800 | 1.28792300  |
| C | -0.74348700 | 2.47113700  | -1.95031400 |
| C | -0.07730600 | 3.66900600  | -2.29717400 |
| C | -0.54030300 | 1.28922700  | -2.73539100 |
| C | 0.79181500  | 3.73624200  | -3.36796400 |
| H | -0.27090600 | 4.55560900  | -1.69692200 |
| C | 0.36941900  | 1.38563900  | -3.82687800 |
| C | 1.01266400  | 2.56955100  | -4.12945700 |
| H | 1.28862800  | 4.66563200  | -3.62370400 |
| H | 0.51481100  | 0.49444000  | -4.42840300 |
| H | 1.68893500  | 2.60510900  | -4.97960700 |
| C | -3.73130100 | -2.99630300 | -0.21776300 |
| C | -4.15086700 | -4.22813900 | 0.33671600  |

|    |             |             |             |
|----|-------------|-------------|-------------|
| C  | -2.99799600 | -2.97976900 | -1.45019700 |
| C  | -3.86365700 | -5.43375700 | -0.27028500 |
| H  | -4.71263800 | -4.20754300 | 1.26795400  |
| C  | -2.74294400 | -4.23837300 | -2.06763100 |
| C  | -3.15665900 | -5.42293900 | -1.48984700 |
| H  | -4.18698200 | -6.36938100 | 0.17219200  |
| H  | -2.21527700 | -4.22624800 | -3.01597100 |
| H  | -2.93762100 | -6.36252900 | -1.99032700 |
| O  | -1.10648300 | 0.14714900  | -2.50529700 |
| O  | -2.55433700 | -1.90925100 | -2.03286900 |
| H  | -2.47160200 | 1.34112200  | 1.68921000  |
| C  | -3.12192600 | 1.63259800  | 0.85594700  |
| C  | -3.69798600 | 3.03723100  | 1.12191300  |
| C  | -4.25896400 | 0.60812200  | 0.77975600  |
| C  | -4.99624800 | 2.96547900  | 1.95834800  |
| H  | -2.95030100 | 3.63808200  | 1.64763200  |
| H  | -3.90639100 | 3.52349700  | 0.16325900  |
| C  | -4.88763700 | 0.42398100  | 2.16837600  |
| H  | -5.00184400 | 0.99420900  | 0.07244600  |
| C  | -4.97560500 | 1.77453800  | 2.92354700  |
| H  | -5.13026400 | 3.90067700  | 2.51087000  |
| H  | -5.86044800 | 2.87633000  | 1.28986200  |
| H  | -4.27783500 | -0.27637000 | 2.75088600  |
| H  | -5.88352700 | -0.01877100 | 2.06329400  |
| H  | -4.10858300 | 1.87587600  | 3.58326900  |
| H  | -5.86265600 | 1.78480100  | 3.56421000  |
| Co | -2.46541800 | -0.19229700 | -1.21639700 |
| Cl | -4.08920100 | 0.63671600  | -2.52919700 |
| H  | -0.12081300 | -0.48111300 | -0.41571900 |
| O  | 1.30704200  | -0.38479800 | -0.75189900 |
| C  | 1.63309700  | -1.42537800 | -1.65167300 |
| C  | 0.45564200  | -2.32752000 | -1.46477100 |
| H  | 2.57357600  | -1.92151600 | -1.39397800 |
| H  | 1.67724800  | -1.03747700 | -2.67591300 |
| H  | -0.43672000 | -2.13127700 | -2.06269200 |
| C  | 0.47377700  | -3.43946900 | -0.53072600 |
| H  | 0.91346000  | -3.09207700 | 0.42008400  |
| H  | 1.23033400  | -4.15432600 | -0.90194800 |
| H  | -0.49262800 | -3.92520100 | -0.41447500 |
| O  | -1.00556500 | -0.92199300 | -0.13472400 |
| H  | -0.90797200 | -0.92962700 | 0.83909700  |
| N  | 1.87343600  | 1.70120900  | 0.70223900  |
| N  | 3.82291700  | 0.11013600  | 0.04434300  |
| C  | 1.04198800  | 2.42470200  | 1.36534200  |
| H  | 0.98639800  | 3.49078300  | 1.14254800  |
| C  | 4.75129200  | -0.77469000 | -0.10507700 |
| H  | 5.67660800  | -0.46845000 | -0.59712500 |
| C  | 0.16571600  | 1.94823000  | 2.40098400  |
| C  | -0.54253200 | 2.89803000  | 3.16736100  |
| C  | -0.02974300 | 0.55257100  | 2.63925700  |
| C  | -1.41480900 | 2.51504600  | 4.17051000  |
| H  | -0.37805600 | 3.95357800  | 2.96259700  |
| C  | -0.93960200 | 0.18531200  | 3.66406600  |
| C  | -1.60407100 | 1.14159300  | 4.41284500  |
| H  | -1.93816600 | 3.25740900  | 4.76286700  |
| H  | -1.07416600 | -0.87453900 | 3.85349600  |
| H  | -2.27857800 | 0.82381600  | 5.20326500  |
| C  | 4.69546000  | -2.14030100 | 0.32280800  |
| C  | 5.82086700  | -2.96138200 | 0.07528500  |
| C  | 3.54295700  | -2.68741000 | 0.97350000  |
| C  | 5.84242000  | -4.29082800 | 0.44363300  |
| H  | 6.68349200  | -2.51718200 | -0.41623500 |
| C  | 3.59396400  | -4.05920400 | 1.34213800  |
| C  | 4.70999500  | -4.83202800 | 1.08422500  |
| H  | 6.71425600  | -4.90614400 | 0.25109500  |
| H  | 2.72927100  | -4.47059900 | 1.85220500  |
| H  | 4.71451800  | -5.87515400 | 1.38895400  |
| O  | 0.52389600  | -0.39245400 | 1.92373800  |
| O  | 2.44685600  | -2.02412100 | 1.20239800  |

|    |            |             |             |
|----|------------|-------------|-------------|
| H  | 2.18838900 | 1.93126500  | -1.30935200 |
| C  | 2.69765500 | 2.23063600  | -0.38616900 |
| C  | 2.92789100 | 3.74860700  | -0.37893100 |
| C  | 4.05035600 | 1.51230400  | -0.33036300 |
| C  | 4.15242100 | 4.13290400  | -1.24870400 |
| H  | 2.03248000 | 4.24860500  | -0.75327000 |
| H  | 3.09173900 | 4.08169800  | 0.65210300  |
| C  | 4.80085400 | 1.71145900  | -1.66368800 |
| H  | 4.61852700 | 1.95707300  | 0.49694000  |
| C  | 4.44724800 | 3.06860800  | -2.31233700 |
| H  | 3.98034700 | 5.10479600  | -1.72103200 |
| H  | 5.03548900 | 4.25257400  | -0.60975800 |
| H  | 4.53431000 | 0.89559200  | -2.34475500 |
| H  | 5.88043600 | 1.64944500  | -1.49160800 |
| H  | 3.56574600 | 2.95219000  | -2.95083500 |
| H  | 5.26606700 | 3.39236700  | -2.96243100 |
| Co | 2.19376400 | -0.15940600 | 0.97963500  |
| Cl | 3.28509800 | 0.31815000  | 2.90062100  |

**IV-m (PO-Co<sup>III</sup>-Cl + H<sub>2</sub>O-Co<sup>III</sup>-Cl)**

PO-Co<sup>III</sup>-Cl + H<sub>2</sub>O-Co<sup>III</sup>-Cl = PG + 2Co<sup>III</sup>(salen)-Cl

Charge: 0

Spin Multiplicity: 1

Sum of electronic and thermal Free Energies (a.u.): -3548.198662

Thermal correction to Gibbs Free Energy (a.u.): 0.771839

No imaginary frequency

Calculation of single point energy based on the optimized structure, Er = -6025.3937321 a.u.

|   |            |             |             |
|---|------------|-------------|-------------|
| N | 3.02964000 | -1.11890700 | 0.20897300  |
| N | 3.70097000 | 1.38212600  | -0.00083600 |
| C | 2.82066800 | -2.37384000 | -0.01208900 |
| H | 3.26481300 | -3.10291200 | 0.66653700  |
| C | 3.88681000 | 2.64122500  | -0.21610900 |
| H | 4.67394100 | 3.14766900  | 0.34531400  |
| C | 2.06131200 | -2.90845600 | -1.10445000 |
| C | 2.08773900 | -4.30498200 | -1.32326600 |
| C | 1.29076100 | -2.06430600 | -1.96915500 |
| C | 1.41786700 | -4.88397900 | -2.38436300 |
| H | 2.66831400 | -4.92383100 | -0.64272300 |
| C | 0.63046300 | -2.68574200 | -3.06384800 |
| C | 0.69846500 | -4.05149000 | -3.26536200 |
| H | 1.45944400 | -5.95503000 | -2.54785800 |
| H | 0.08905400 | -2.03951800 | -3.74661800 |
| H | 0.18817100 | -4.48892700 | -4.11921600 |
| C | 3.16058400 | 3.45848700  | -1.13881000 |
| C | 3.50046400 | 4.82998100  | -1.21659000 |
| C | 2.11702700 | 2.93605900  | -1.96939700 |
| C | 2.84997100 | 5.69274900  | -2.07422200 |
| H | 4.29856200 | 5.19812400  | -0.57579200 |
| C | 1.46970300 | 3.84762000  | -2.84984700 |
| C | 1.82549300 | 5.18137200  | -2.89569100 |
| H | 3.12371700 | 6.74092900  | -2.12077600 |
| H | 0.69416200 | 3.44710400  | -3.49439000 |
| H | 1.30898000 | 5.84512100  | -3.58409300 |
| O | 1.12836800 | -0.79055300 | -1.77614400 |
| O | 1.70731700 | 1.70318600  | -1.95722400 |
| H | 3.06232400 | -0.30450300 | 2.10582400  |
| C | 3.79728500 | -0.62822600 | 1.35676700  |
| C | 4.74764700 | -1.63850800 | 2.01517400  |
| C | 4.56948000 | 0.61702100  | 0.90167300  |
| C | 5.83299300 | -0.91952500 | 2.85336800  |
| H | 4.16523300 | -2.31215900 | 2.65125900  |
| H | 5.22472400 | -2.24675400 | 1.23929000  |
| C | 5.07269200 | 1.39460300  | 2.13700900  |
| H | 5.41466900 | 0.27043500  | 0.29328000  |
| C | 5.34882800 | 0.45359400  | 3.33178800  |
| H | 6.12091400 | -1.54546500 | 3.70336600  |
| H | 6.73705900 | -0.78638900 | 2.24748500  |
| H | 4.31817600 | 2.13541600  | 2.42211400  |
| H | 5.98381100 | 1.94350500  | 1.87779700  |
| H | 4.43283800 | 0.32570200  | 3.92075600  |

|    |             |             |             |
|----|-------------|-------------|-------------|
| H  | 6.08528600  | 0.91116900  | 3.99933700  |
| Co | 2.42920000  | 0.30783200  | -0.91381300 |
| Cl | 4.00732700  | -0.19133900 | -2.43342600 |
| H  | 0.19945800  | 0.89416900  | 0.12112400  |
| O  | -1.37330200 | 1.03237500  | -0.46795100 |
| C  | -1.41805100 | 0.99464700  | -1.93023900 |
| C  | -1.42374600 | 2.28964200  | -1.23920000 |
| H  | -2.36627300 | 0.61544200  | -2.30241300 |
| H  | -0.50190300 | 0.60660800  | -2.36478300 |
| H  | -0.46594700 | 2.79734700  | -1.17133000 |
| C  | -2.63992600 | 3.15664800  | -1.13353200 |
| H  | -2.68776700 | 3.64351500  | -0.15818600 |
| H  | -3.56067800 | 2.59251100  | -1.28588200 |
| H  | -2.57087600 | 3.93013700  | -1.90649700 |
| O  | 1.12393300  | 0.83698800  | 0.47095500  |
| H  | 1.07149800  | 0.16866600  | 1.17240000  |
| N  | -1.50350400 | -1.54595100 | 0.57037000  |
| N  | -3.76464400 | -0.61989800 | -0.31995900 |
| C  | -0.52132800 | -2.00133900 | 1.27225300  |
| H  | -0.04845100 | -2.93098900 | 0.95845800  |
| C  | -4.92160200 | -0.08507500 | -0.56552100 |
| H  | -5.58677800 | -0.60626300 | -1.25689900 |
| C  | 0.03587700  | -1.37081100 | 2.43401900  |
| C  | 1.06738300  | -2.04709400 | 3.13184500  |
| C  | -0.39527800 | -0.07044100 | 2.87010500  |
| C  | 1.69118600  | -1.48136600 | 4.22404700  |
| H  | 1.35991800  | -3.03471900 | 2.78321200  |
| C  | 0.28151000  | 0.49130800  | 3.99303200  |
| C  | 1.28663300  | -0.19355200 | 4.64379200  |
| H  | 2.47135900  | -2.01430500 | 4.75656500  |
| H  | -0.03386200 | 1.47826100  | 4.31254100  |
| H  | 1.77179600  | 0.26488200  | 5.50135300  |
| C  | -5.42936100 | 1.11895800  | -0.00021600 |
| C  | -6.71365700 | 1.56393200  | -0.40718600 |
| C  | -4.68621300 | 1.87124600  | 0.97073000  |
| C  | -7.27231700 | 2.71325800  | 0.10405400  |
| H  | -7.25614300 | 0.96929900  | -1.13879000 |
| C  | -5.29451600 | 3.05240900  | 1.48351000  |
| C  | -6.54285900 | 3.45565900  | 1.06022800  |
| H  | -8.25582900 | 3.04166900  | -0.21334100 |
| H  | -4.73321900 | 3.61585900  | 2.22086300  |
| H  | -6.97649900 | 4.36158900  | 1.47526900  |
| O  | -1.28527100 | 0.64227500  | 2.25985300  |
| O  | -3.49066300 | 1.57627600  | 1.36746400  |
| H  | -1.45347000 | -1.75738100 | -1.47718100 |
| C  | -1.96838100 | -2.23783300 | -0.63691600 |
| C  | -1.70543800 | -3.74990300 | -0.67699700 |
| C  | -3.47137200 | -1.98887800 | -0.77192900 |
| C  | -2.58764300 | -4.44240000 | -1.74761200 |
| H  | -0.65262600 | -3.93904800 | -0.88712300 |
| H  | -1.92840300 | -4.16594000 | 0.31184600  |
| C  | -3.93459700 | -2.32913200 | -2.20301000 |
| H  | -3.96830300 | -2.65180300 | -0.05230200 |
| C  | -3.07243500 | -3.45574500 | -2.81740900 |
| H  | -2.02226600 | -5.25385900 | -2.21496300 |
| H  | -3.45923400 | -4.90383300 | -1.26852900 |
| H  | -3.87100400 | -1.43082800 | -2.82823900 |
| H  | -4.98665700 | -2.63164000 | -2.18613600 |
| H  | -2.20026700 | -3.02192200 | -3.31660000 |
| H  | -3.64471200 | -3.97892500 | -3.58978300 |
| Co | -2.54311300 | 0.00068500  | 0.99478500  |
| Cl | -3.64864600 | -1.16283000 | 2.53755500  |

**IV-m (PO-Co<sup>III</sup>-Cl + H<sub>2</sub>O-Co<sup>III</sup>-Cl)**

PO-Co<sup>III</sup>-Cl + H<sub>2</sub>O-Co<sup>III</sup>-Cl = PG + 2Co<sup>III</sup>(salen)-Cl

Charge: 0

Spin Multiplicity: 1

Sum of electronic and thermal Free Energies (a.u.): -3548.247752

Thermal correction to Gibbs Free Energy (a.u.): 0.778607

No imaginary frequency

Calculation of single point energy based on the optimized structure,  $E_p = -6025.4414365$  a.u.

|    |             |             |             |
|----|-------------|-------------|-------------|
| N  | 2.42689100  | -1.44419400 | 0.27563100  |
| N  | 3.83341200  | 0.73560900  | 0.10539600  |
| C  | 1.91146200  | -2.58696500 | -0.01458500 |
| H  | 2.09561100  | -3.43287000 | 0.64641600  |
| C  | 4.46588600  | 1.82881700  | -0.16720400 |
| H  | 5.37472200  | 2.04870500  | 0.39642900  |
| C  | 1.10100800  | -2.84783200 | -1.17781000 |
| C  | 0.82959400  | -4.18678700 | -1.51781100 |
| C  | 0.54747200  | -1.79131700 | -1.95771400 |
| C  | 0.06375800  | -4.50760000 | -2.62700000 |
| H  | 1.24375400  | -4.97397800 | -0.89312500 |
| C  | -0.21606200 | -2.13838100 | -3.09332500 |
| C  | -0.44514300 | -3.46639000 | -3.42184100 |
| H  | -0.12202700 | -5.54324500 | -2.88980600 |
| H  | -0.59187100 | -1.32973200 | -3.71100600 |
| H  | -1.02115500 | -3.70247100 | -4.31256000 |
| C  | 4.10048700  | 2.79005300  | -1.16039100 |
| C  | 4.93159100  | 3.92455700  | -1.32625900 |
| C  | 2.93425700  | 2.63527900  | -1.97871900 |
| C  | 4.64991400  | 4.89663100  | -2.26219200 |
| H  | 5.81164800  | 4.01424300  | -0.69334200 |
| C  | 2.66984400  | 3.65371900  | -2.93494500 |
| C  | 3.50266100  | 4.74634700  | -3.06889900 |
| H  | 5.29776200  | 5.75821600  | -2.38007900 |
| H  | 1.79146000  | 3.53040300  | -3.55946200 |
| H  | 3.27004800  | 5.50236600  | -3.81413300 |
| O  | 0.68617100  | -0.52162000 | -1.63753700 |
| O  | 2.08737100  | 1.65516700  | -1.87543300 |
| H  | 2.60364800  | -0.68611500 | 2.17355700  |
| C  | 3.25252200  | -1.20878100 | 1.46032100  |
| C  | 3.85444000  | -2.45398000 | 2.12587900  |
| C  | 4.37596000  | -0.24513200 | 1.05305200  |
| C  | 5.05611000  | -2.07732200 | 3.02912000  |
| H  | 3.07940100  | -2.95967100 | 2.70704800  |
| H  | 4.18659300  | -3.15074400 | 1.34843700  |
| C  | 5.02172300  | 0.36136900  | 2.31654800  |
| H  | 5.11473100  | -0.83386400 | 0.49356300  |
| C  | 4.96839300  | -0.62312800 | 3.50737600  |
| H  | 5.10702100  | -2.75944600 | 3.88314100  |
| H  | 5.99157400  | -2.21018600 | 2.47283400  |
| H  | 4.49411500  | 1.28596200  | 2.57446300  |
| H  | 6.06152500  | 0.63040600  | 2.10433300  |
| H  | 4.03294400  | -0.48298700 | 4.06195700  |
| H  | 5.77751100  | -0.39924400 | 4.20921300  |
| Co | 2.29551500  | 0.11981300  | -0.80961200 |
| Cl | 3.64170600  | -0.82369500 | -2.34059200 |
| H  | -0.51656800 | 0.36689900  | -1.01551700 |
| O  | -1.16688400 | 0.99730400  | -0.58472600 |
| C  | -0.52800600 | 2.27896200  | -0.44046500 |
| C  | 0.66703300  | 2.27842000  | 0.55004900  |
| H  | -1.29518300 | 2.98561500  | -0.12840800 |
| H  | -0.15778600 | 2.54490300  | -1.43183600 |
| H  | 1.45891700  | 2.87492500  | 0.09812800  |
| C  | 0.39376800  | 2.80629400  | 1.95165600  |
| H  | -0.31556100 | 2.17138800  | 2.48047000  |
| H  | -0.02996500 | 3.81416500  | 1.89174100  |
| H  | 1.33565300  | 2.86089100  | 2.50649300  |
| O  | 1.20744600  | 0.94463700  | 0.65850300  |
| H  | 0.48817200  | 0.36746000  | 1.05673100  |
| N  | -2.31722700 | -1.50365300 | -0.21276100 |
| N  | -3.84948900 | 0.59765500  | -0.30273400 |
| C  | -1.74421100 | -2.58851100 | 0.17833900  |
| H  | -1.85391500 | -3.48803600 | -0.42565700 |
| C  | -4.51562200 | 1.70189500  | -0.22027500 |
| H  | -5.36912400 | 1.83514400  | -0.88710300 |
| C  | -0.95907800 | -2.72602200 | 1.37850700  |
| C  | -0.57745600 | -4.02045000 | 1.78236800  |
| C  | -0.52189800 | -1.59471100 | 2.12334600  |

|    |             |             |             |
|----|-------------|-------------|-------------|
| C  | 0.20290200  | -4.22385200 | 2.90844700  |
| H  | -0.90916700 | -4.86673700 | 1.18654000  |
| C  | 0.27368500  | -1.82097400 | 3.26855500  |
| C  | 0.62040800  | -3.10727700 | 3.65366700  |
| H  | 0.47522200  | -5.22678000 | 3.21866700  |
| H  | 0.57993200  | -0.95440100 | 3.84487800  |
| H  | 1.21663900  | -3.25187700 | 4.55064000  |
| C  | -4.26336800 | 2.77505600  | 0.68777100  |
| C  | -5.09959400 | 3.91605700  | 0.62562600  |
| C  | -3.22310500 | 2.70395300  | 1.66857000  |
| C  | -4.93995800 | 4.97590400  | 1.49241700  |
| H  | -5.88394600 | 3.93874400  | -0.12767100 |
| C  | -3.09193200 | 3.80571300  | 2.55950100  |
| C  | -3.92293800 | 4.90401500  | 2.46738400  |
| H  | -5.58758600 | 5.84371900  | 1.43414400  |
| H  | -2.31700500 | 3.74536700  | 3.31510800  |
| H  | -3.79221400 | 5.72695400  | 3.16510200  |
| O  | -0.77711600 | -0.35475400 | 1.75874400  |
| O  | -2.38256700 | 1.72086400  | 1.77651100  |
| H  | -2.48426700 | -0.96140700 | -2.18886300 |
| C  | -3.12364000 | -1.43619400 | -1.43383900 |
| C  | -3.64895300 | -2.77734500 | -1.96821600 |
| C  | -4.30737000 | -0.50163000 | -1.15915000 |
| C  | -4.84524900 | -2.56889700 | -2.93059300 |
| H  | -2.83880800 | -3.30659600 | -2.47423500 |
| H  | -3.96543700 | -3.39585600 | -1.12134400 |
| C  | -4.94903900 | -0.06977300 | -2.49409300 |
| H  | -5.02831400 | -1.07001400 | -0.55760200 |
| C  | -4.81875700 | -1.17480300 | -3.56714800 |
| H  | -4.83910800 | -3.34370300 | -3.70321000 |
| H  | -5.78672100 | -2.68885500 | -2.38162700 |
| H  | -4.46119700 | 0.84623300  | -2.84471400 |
| H  | -6.00576000 | 0.16713300  | -2.33322200 |
| H  | -3.87842900 | -1.04831500 | -4.11683700 |
| H  | -5.62101500 | -1.07154300 | -4.30409600 |
| Co | -2.36393500 | 0.13309700  | 0.77920600  |
| Cl | -3.76997800 | -0.83597300 | 2.23900400  |

### II-t (PO + H<sub>2</sub>O-Co<sup>III</sup>-OAc)

PO + H<sub>2</sub>O-Co<sup>III</sup>-OAc = PG + Co<sup>III</sup>(salen)-OAc

Charge: 0

Spin Multiplicity: 1

Sum of electronic and thermal Free Energies (a.u.): -1677.011706

Thermal correction to Gibbs Free Energy (a.u.): 0.466720

Imaginary frequencies: -516.22

Calculation of single point energy based on the optimized structure, Et = -2915.8164024 a.u.

|   |             |             |             |
|---|-------------|-------------|-------------|
| C | 3.21794900  | -1.79449800 | -2.02757400 |
| C | 1.86146400  | -2.34272200 | -2.08088200 |
| O | 2.79328400  | -0.75928200 | -2.93193700 |
| H | 3.48230900  | -1.40301500 | -1.04494200 |
| H | 1.15772700  | -2.33742900 | -1.25223700 |
| H | 1.56336200  | -2.78189800 | -3.02914600 |
| C | 4.33905600  | -2.60198700 | -2.64953400 |
| H | 5.20657700  | -1.95026000 | -2.78387900 |
| H | 4.62327500  | -3.43255900 | -1.99755200 |
| H | 4.04347400  | -2.99345700 | -3.62675700 |
| O | 0.66231400  | -0.16018700 | -1.88851500 |
| H | 1.98020200  | -0.27802600 | -2.48829600 |
| H | -0.05578700 | -0.46009600 | -2.46145800 |
| C | 4.77191000  | -0.47517900 | 2.14255300  |
| C | 4.84265600  | 0.92464800  | 2.27657100  |
| C | 3.67582400  | -1.08288800 | 1.55983000  |
| H | 5.58836200  | -1.09152500 | 2.51003300  |
| C | 3.78711100  | 1.68632400  | 1.81409300  |
| H | 5.70486500  | 1.39311200  | 2.73823800  |
| C | 2.57468000  | -0.32364500 | 1.06932400  |
| H | 3.60742600  | -2.16295700 | 1.47507800  |
| C | 2.65033200  | 1.10058200  | 1.21282700  |
| H | 3.81597700  | 2.76960100  | 1.90973500  |

|    |             |             |             |
|----|-------------|-------------|-------------|
| O  | 1.59897100  | -0.95573700 | 0.49523300  |
| C  | 1.60851400  | 1.97435800  | 0.75504100  |
| Co | -0.04342100 | -0.18875900 | -0.08373600 |
| N  | 0.50370200  | 1.61776800  | 0.19549300  |
| H  | 1.78689400  | 3.03961400  | 0.91392300  |
| N  | -1.67018600 | 0.54547900  | -0.72725400 |
| C  | -0.55404100 | 2.59128000  | -0.12668800 |
| C  | -2.81293300 | -0.04165400 | -0.63484500 |
| C  | -1.47279500 | 1.92625400  | -1.16574900 |
| C  | -0.09703900 | 3.96046600  | -0.63132600 |
| H  | -3.71568700 | 0.52294300  | -0.86889000 |
| C  | -2.99103000 | -1.41168500 | -0.24031300 |
| C  | -2.72213800 | 2.77161200  | -1.39605600 |
| C  | -1.32640500 | 4.84131600  | -0.90854300 |
| H  | 0.50044800  | 3.83476900  | -1.54441300 |
| H  | 0.54032200  | 4.45897000  | 0.10574800  |
| C  | -4.29877600 | -1.87761200 | 0.01337600  |
| C  | -1.88168000 | -2.31740800 | -0.17551800 |
| C  | -2.30888900 | 4.17118800  | -1.87786500 |
| H  | -3.37469300 | 2.30136300  | -2.14051500 |
| H  | -3.28489300 | 2.84135300  | -0.45713500 |
| H  | -1.00767100 | 5.81135700  | -1.30511100 |
| H  | -1.83853600 | 5.04072100  | 0.04163800  |
| C  | -4.54306500 | -3.19735500 | 0.34375200  |
| H  | -5.12066900 | -1.16784800 | -0.04720300 |
| C  | -2.16491100 | -3.66871600 | 0.14609900  |
| O  | -0.65351400 | -1.96666000 | -0.44544600 |
| H  | -1.83872500 | 4.08350900  | -2.86676100 |
| H  | -3.19771800 | 4.79772200  | -2.00797300 |
| C  | -3.45728600 | -4.09113000 | 0.40249800  |
| H  | -5.55124300 | -3.53945100 | 0.55076100  |
| H  | -1.32587300 | -4.35462600 | 0.19979900  |
| H  | -3.63418200 | -5.13218300 | 0.66008600  |
| H  | -0.90261800 | 1.85973800  | -2.10323400 |
| H  | -1.14779800 | 2.69104500  | 0.78820900  |
| C  | -1.95445000 | -0.46473200 | 3.63536100  |
| H  | -1.06230000 | -0.81193200 | 4.16179700  |
| H  | -2.54884100 | -1.34820900 | 3.37862400  |
| H  | -2.54470900 | 0.19497500  | 4.27303100  |
| C  | -1.57315400 | 0.25278700  | 2.34435800  |
| O  | -0.65313700 | -0.39496800 | 1.69198500  |
| O  | -2.14003600 | 1.29943700  | 2.01583800  |

**II-t (PO + H<sub>2</sub>O-Co<sup>III</sup>-OAc)**

PO + H<sub>2</sub>O-Co<sup>III</sup>-OAc = PG + Co<sup>III</sup>(salen)-OAc

Charge: 0

Spin Multiplicity: 1

Sum of electronic and thermal Free Energies (a.u.): -1677.086444

Thermal correction to Gibbs Free Energy (a.u.): 0.469106

No imaginary frequency

Calculation of single point energy based on the optimized structure, Er = -2915.8859665 a.u.

|   |             |             |             |
|---|-------------|-------------|-------------|
| C | 3.85553000  | -1.56271700 | -1.86944700 |
| C | 2.76552500  | -2.54259300 | -1.79614000 |
| O | 2.67102200  | -1.39487300 | -2.68755000 |
| H | 3.91615300  | -0.83746500 | -1.06254200 |
| H | 2.07020900  | -2.51350400 | -0.96198000 |
| H | 2.87341500  | -3.48841500 | -2.32473600 |
| C | 5.12717800  | -1.82919500 | -2.62743700 |
| H | 5.50790200  | -0.90873200 | -3.08152600 |
| H | 5.89630100  | -2.21313300 | -1.94858200 |
| H | 4.96169100  | -2.56340400 | -3.42064300 |
| O | 0.44995800  | -0.07254400 | -2.13187600 |
| H | 1.39249400  | -0.38778500 | -2.22198700 |
| H | -0.05327100 | -0.86321400 | -2.38887100 |
| C | 4.59918800  | 0.62383100  | 2.20130200  |
| C | 4.33291700  | 1.99257000  | 2.39969300  |
| C | 3.72707900  | -0.18051900 | 1.49208300  |
| H | 5.50202000  | 0.18727000  | 2.62039600  |
| C | 3.17171400  | 2.52266000  | 1.87369200  |
| H | 5.02288800  | 2.61401700  | 2.95981200  |



|    |             |             |             |
|----|-------------|-------------|-------------|
| C  | 2.52751700  | 0.33870300  | 0.93219000  |
| H  | 3.92062400  | -1.23923000 | 1.35583500  |
| C  | 2.25427100  | 1.72855700  | 1.14790300  |
| H  | 2.93912100  | 3.57547900  | 2.01759500  |
| O  | 1.77297500  | -0.45572400 | 0.23129400  |
| C  | 1.07500300  | 2.35990200  | 0.63504400  |
| Co | -0.04548800 | -0.11800600 | -0.17904300 |
| N  | 0.10990700  | 1.77375800  | 0.00991500  |
| H  | 0.99544000  | 3.43476600  | 0.81325100  |
| N  | -1.83802100 | 0.22663200  | -0.70496400 |
| C  | -1.12694300 | 2.50044700  | -0.33128400 |
| C  | -2.81974800 | -0.58040700 | -0.49586000 |
| C  | -1.96005000 | 1.58188600  | -1.23892400 |
| C  | -0.95545500 | 3.86362100  | -1.00309900 |
| H  | -3.83730700 | -0.23148000 | -0.67476900 |
| C  | -2.66220700 | -1.93493300 | -0.04299100 |
| C  | -3.36455300 | 2.15049200  | -1.41954600 |
| C  | -2.34326200 | 4.48218700  | -1.24231300 |
| H  | -0.41783300 | 3.73991400  | -1.95235300 |
| H  | -0.35929100 | 4.53812100  | -0.38028500 |
| C  | -3.80647900 | -2.65587700 | 0.35954900  |
| C  | -1.38230100 | -2.57910400 | -0.07561600 |
| C  | -3.26156500 | 3.55114900  | -2.04741100 |
| H  | -3.96597000 | 1.50068600  | -2.06522400 |
| H  | -3.86207400 | 2.20187400  | -0.44327700 |
| H  | -2.24077000 | 5.44383800  | -1.75645900 |
| H  | -2.80679700 | 4.69166100  | -0.26948900 |
| C  | -3.72234100 | -3.97980100 | 0.74807400  |
| H  | -4.76536100 | -2.14274200 | 0.36757600  |
| C  | -1.33005700 | -3.94107200 | 0.30849300  |
| O  | -0.28872400 | -1.98840500 | -0.48869000 |
| H  | -2.86907600 | 3.45244000  | -3.06837400 |
| H  | -4.25971200 | 3.99265800  | -2.13724400 |
| C  | -2.46808600 | -4.61713700 | 0.71291500  |
| H  | -4.60627400 | -4.51974300 | 1.06969400  |
| H  | -0.36139900 | -4.42888000 | 0.28432900  |
| H  | -2.38835100 | -5.65863800 | 1.01306300  |
| H  | -1.46082700 | 1.55433200  | -2.21731700 |
| H  | -1.67911500 | 2.60143000  | 0.60786700  |
| C  | -1.46381000 | -0.51766200 | 3.71763100  |
| H  | -0.47013500 | -0.64449500 | 4.15368600  |
| H  | -1.89471200 | -1.51571400 | 3.58624000  |
| H  | -2.10165900 | 0.06911800  | 4.37989500  |
| C  | -1.36884700 | 0.15521200  | 2.35320200  |
| O  | -0.42916200 | -0.38430600 | 1.62619300  |
| O  | -2.13539800 | 1.06600300  | 2.03759300  |

**II-t (PO + H<sub>2</sub>O-Co<sup>III</sup>-OAc)**

PO + H<sub>2</sub>O-Co<sup>III</sup>-OAc = PG + Co<sup>III</sup>(salen)-OAc

Charge: 0

Spin Multiplicity: 1

Sum of electronic and thermal Free Energies (a.u.): -1677.105958

Thermal correction to Gibbs Free Energy (a.u.): 0.473695

No imaginary frequency

Calculation of single point energy based on the optimized structure, Ep = -2915.913349 a.u.

|   |             |             |             |
|---|-------------|-------------|-------------|
| C | 2.70548900  | 0.82840700  | -2.22338100 |
| C | 1.59872900  | -0.04538600 | -2.79151000 |
| O | 2.37374000  | 2.20930400  | -2.37917400 |
| H | 2.80903600  | 0.59048500  | -1.15786800 |
| H | 1.78281600  | -1.10229100 | -2.59131400 |
| H | 1.49144400  | 0.13304700  | -3.86742300 |
| C | 4.03050200  | 0.57503700  | -2.92415800 |
| H | 4.79586600  | 1.24159100  | -2.51893400 |
| H | 4.35564700  | -0.45854400 | -2.77116100 |
| H | 3.94405300  | 0.76794900  | -3.99807400 |
| O | 0.35946000  | 0.35787400  | -2.15493100 |
| H | 1.42086200  | 2.27695100  | -2.22898800 |
| H | -0.39109500 | -0.15221200 | -2.52756600 |
| C | 3.72297200  | -3.74125900 | 0.74789300  |
| C | 4.27577600  | -2.86988900 | 1.71037800  |

|    |             |             |             |
|----|-------------|-------------|-------------|
| C  | 2.61964600  | -3.37964100 | 0.00164700  |
| H  | 4.17026100  | -4.71963900 | 0.59341200  |
| C  | 3.69636600  | -1.63269100 | 1.89212100  |
| H  | 5.14074300  | -3.16887800 | 2.29211500  |
| C  | 1.98989300  | -2.11656500 | 0.17679400  |
| H  | 2.18589500  | -4.05058800 | -0.73213200 |
| C  | 2.56281900  | -1.22682200 | 1.14571000  |
| H  | 4.10795500  | -0.93761600 | 2.62048600  |
| O  | 0.96416700  | -1.83008600 | -0.56701700 |
| C  | 2.06107300  | 0.09527200  | 1.34902900  |
| Co | -0.20019500 | -0.37082300 | -0.29168400 |
| N  | 1.04656500  | 0.62466700  | 0.74527200  |
| H  | 2.60707800  | 0.70979500  | 2.06829200  |
| N  | -1.32429200 | 1.15396400  | -0.13417900 |
| C  | 0.58598700  | 1.97931000  | 1.09881800  |
| C  | -2.61078200 | 1.11280800  | -0.14643000 |
| C  | -0.52768500 | 2.35251200  | 0.10935800  |
| C  | 1.65478700  | 3.07488400  | 1.08265000  |
| H  | -3.16990000 | 2.01386400  | 0.10785000  |
| C  | -3.37368400 | -0.05748000 | -0.48636000 |
| C  | -1.23963500 | 3.62053500  | 0.57019500  |
| C  | 1.00747100  | 4.40470800  | 1.50558000  |
| H  | 2.08709000  | 3.14469400  | 0.07614500  |
| H  | 2.47249700  | 2.83414400  | 1.76972700  |
| C  | -4.76453300 | -0.05611000 | -0.24910400 |
| C  | -2.75943700 | -1.17647500 | -1.13359100 |
| C  | -0.21068500 | 4.76360400  | 0.64073500  |
| H  | -2.04210600 | 3.89197000  | -0.12466100 |
| H  | -1.69466700 | 3.44364900  | 1.55220700  |
| H  | 1.74660700  | 5.21144600  | 1.45992500  |
| H  | 0.69175300  | 4.32413800  | 2.55400200  |
| C  | -5.55566300 | -1.13029300 | -0.61231900 |
| H  | -5.20660800 | 0.81005000  | 0.23763400  |
| C  | -3.59427600 | -2.25306100 | -1.51137600 |
| O  | -1.47947900 | -1.22680300 | -1.42883000 |
| H  | 0.12747900  | 4.99453000  | -0.37828000 |
| H  | -0.68962200 | 5.67073200  | 1.02386100  |
| C  | -4.95454600 | -2.22936100 | -1.25213300 |
| H  | -6.62162700 | -1.12456900 | -0.41226400 |
| H  | -3.12520700 | -3.09998900 | -2.00038700 |
| H  | -5.56580800 | -3.07864300 | -1.54525400 |
| H  | -0.04234600 | 2.57001900  | -0.85229500 |
| H  | 0.12439700  | 1.89926000  | 2.08691900  |
| C  | -2.04027400 | -1.83336100 | 3.13273500  |
| H  | -1.39980300 | -2.71620300 | 3.19366600  |
| H  | -2.97691700 | -2.13917400 | 2.65518900  |
| H  | -2.25121300 | -1.44173900 | 4.12857900  |
| C  | -1.38657000 | -0.75384400 | 2.27839700  |
| O  | -0.89732800 | -1.26128000 | 1.17769300  |
| O  | -1.38276700 | 0.42531000  | 2.62905100  |

### II-m (PO + H<sub>2</sub>O-Co<sup>III</sup>-OAc)

PO + H<sub>2</sub>O-Co<sup>III</sup>-OAc = PG + Co<sup>III</sup>(salen)-OAc

Charge: 0

Spin Multiplicity: 1

Sum of electronic and thermal Free Energies (a.u.): -1677.018211

Thermal correction to Gibbs Free Energy (a.u.): 0.466294

Imaginary frequencies: -407.07

Calculation of single point energy based on the optimized structure, Et = -2915.8264927 a.u.

|   |             |             |             |
|---|-------------|-------------|-------------|
| C | -4.09643400 | -2.93280900 | -1.42765500 |
| C | -4.49259500 | -1.84912100 | -2.23946000 |
| C | -2.99206000 | -2.84258000 | -0.60422000 |
| H | -4.66522400 | -3.85857900 | -1.45616800 |
| C | -3.74998600 | -0.68624200 | -2.20090300 |
| C | -2.20781900 | -1.65489900 | -0.53595000 |
| C | -2.61380500 | -0.55410900 | -1.36800200 |
| H | -4.03458700 | 0.16200200  | -2.81949400 |
| O | -1.23543800 | -1.60457900 | 0.31655300  |
| C | -1.93055100 | 0.71183700  | -1.35731400 |

|    |             |             |             |
|----|-------------|-------------|-------------|
| Co | 0.15795500  | -0.28634000 | 0.29315500  |
| N  | -0.88150900 | 0.99853600  | -0.66809200 |
| H  | -2.35503500 | 1.48438500  | -2.00359400 |
| N  | 1.51535900  | 1.03105800  | 0.29712700  |
| C  | -0.19012900 | 2.28853100  | -0.84695600 |
| C  | 2.77576700  | 0.77473200  | 0.30174700  |
| C  | 0.92374100  | 2.36103100  | 0.20856600  |
| C  | -1.05996800 | 3.54304300  | -0.76213900 |
| H  | 3.48115400  | 1.59430400  | 0.15885200  |
| C  | 3.32693700  | -0.53777600 | 0.49760100  |
| C  | 1.84890900  | 3.53812000  | -0.08680300 |
| C  | -0.17955900 | 4.77770000  | -1.01957700 |
| H  | -1.52444300 | 3.60011300  | 0.23127000  |
| H  | -1.87112300 | 3.51254200  | -1.49716200 |
| C  | 4.70456500  | -0.73889300 | 0.26827400  |
| C  | 2.51773200  | -1.60780700 | 1.00478500  |
| C  | 1.02556300  | 4.83788000  | -0.06901800 |
| H  | 2.64871800  | 3.59909500  | 0.65963900  |
| H  | 2.31977800  | 3.39346800  | -1.06703300 |
| H  | -0.77730900 | 5.69079100  | -0.92518100 |
| H  | 0.18094800  | 4.74119000  | -2.05586000 |
| C  | 5.30353600  | -1.96202700 | 0.50459100  |
| H  | 5.29249700  | 0.09433800  | -0.11033600 |
| C  | 3.16525300  | -2.84367200 | 1.25891300  |
| O  | 1.24781000  | -1.48712900 | 1.28737600  |
| H  | 0.66773300  | 5.01416400  | 0.95424600  |
| H  | 1.66543900  | 5.68825600  | -0.32783300 |
| C  | 4.51536100  | -3.01350400 | 1.00969400  |
| H  | 4.97339700  | -3.98002400 | 1.20386400  |
| H  | 0.44286300  | 2.51810600  | 1.18318500  |
| H  | 0.30141400  | 2.22040500  | -1.82224100 |
| O  | -0.44529400 | 0.37382800  | 1.99976400  |
| H  | 0.18275100  | -0.08984800 | 2.57373000  |
| H  | -1.44168500 | 1.14352900  | 2.68924900  |
| C  | -2.82965700 | -0.61731000 | 2.59175800  |
| C  | -2.61915600 | 0.12826100  | 3.85201200  |
| O  | -2.31312000 | 1.36470700  | 3.22514500  |
| H  | -2.09207200 | -1.31613100 | 2.19842100  |
| H  | -1.80731900 | -0.26324000 | 4.47377500  |
| H  | -3.53353100 | 0.23015500  | 4.44502700  |
| C  | -3.99933100 | -0.34428100 | 1.76130000  |
| H  | -3.68139600 | -0.02908500 | 0.75549500  |
| H  | -4.49757800 | -1.30591600 | 1.56470900  |
| H  | -4.68542200 | 0.38283500  | 2.19566300  |
| H  | 6.36061700  | -2.10848500 | 0.31042400  |
| H  | 2.55455200  | -3.65392300 | 1.64294700  |
| H  | -2.67518700 | -3.67626800 | 0.01395800  |
| H  | -5.35853500 | -1.93274300 | -2.88687400 |
| C  | 1.94612000  | -1.64956200 | -3.24404500 |
| H  | 2.82778500  | -2.08300800 | -2.75991200 |
| H  | 2.23802900  | -1.20466100 | -4.19651300 |
| H  | 1.22886700  | -2.45873000 | -3.40128800 |
| C  | 1.36188500  | -0.58491400 | -2.32097000 |
| O  | 0.76780800  | -1.11608500 | -1.29313500 |
| O  | 1.50401800  | 0.61490700  | -2.57330000 |

### II-m (PO + H<sub>2</sub>O-Co<sup>III</sup>-OAc)

PO + H<sub>2</sub>O-Co<sup>III</sup>-OAc = PG + Co<sup>III</sup>(salen)-OAc

Charge: 0

Spin Multiplicity: 1

Sum of electronic and thermal Free Energies (a.u.): -1677.085543

Thermal correction to Gibbs Free Energy (a.u.): 0.469571

No imaginary frequency

Calculation of single point energy based on the optimized structure, Er = -2915.888765 a.u.

|   |             |             |             |
|---|-------------|-------------|-------------|
| C | -4.18812600 | -2.24850000 | -1.81260600 |
| C | -4.49563600 | -1.02238800 | -2.43679700 |
| C | -3.09586400 | -2.37165600 | -0.97621300 |
| H | -4.81941500 | -3.11457400 | -1.99349400 |
| C | -3.67227600 | 0.06180900  | -2.20481900 |
| C | -2.23278300 | -1.27108200 | -0.71173700 |

|    |             |             |             |
|----|-------------|-------------|-------------|
| C  | -2.54030000 | -0.03024600 | -1.36171300 |
| H  | -3.88391600 | 1.01773700  | -2.67883100 |
| O  | -1.26439800 | -1.43293100 | 0.13697700  |
| C  | -1.74670300 | 1.14741700  | -1.16963600 |
| Co | 0.24652700  | -0.28356000 | 0.26021300  |
| N  | -0.65487400 | 1.22385500  | -0.48546600 |
| H  | -2.10558000 | 2.04964200  | -1.67031900 |
| N  | 1.71591200  | 0.88647200  | 0.49407800  |
| C  | 0.16561200  | 2.44935500  | -0.49265700 |
| C  | 2.94565600  | 0.50985500  | 0.51998300  |
| C  | 1.25609200  | 2.27050300  | 0.57481100  |
| C  | -0.57271200 | 3.76730000  | -0.25614800 |
| H  | 3.72957800  | 1.26804300  | 0.52267600  |
| C  | 3.36581700  | -0.86423500 | 0.56092400  |
| C  | 2.30165100  | 3.37552000  | 0.45042000  |
| C  | 0.43465900  | 4.92646800  | -0.34053800 |
| H  | -1.05625300 | 3.74579200  | 0.72945900  |
| H  | -1.36259700 | 3.91656100  | -0.99929700 |
| C  | 4.73151800  | -1.16352800 | 0.36949800  |
| C  | 2.44115700  | -1.90957400 | 0.88591900  |
| C  | 1.61352900  | 4.74025200  | 0.62592500  |
| H  | 3.08232700  | 3.25825900  | 1.21014900  |
| H  | 2.78208700  | 3.30870800  | -0.53341800 |
| H  | -0.07024600 | 5.87704000  | -0.13735400 |
| H  | 0.81715900  | 4.98495600  | -1.36786500 |
| C  | 5.20607500  | -2.45786800 | 0.47008600  |
| H  | 5.41113400  | -0.34834300 | 0.13160000  |
| C  | 2.95947400  | -3.22285800 | 1.00268100  |
| O  | 1.16956400  | -1.70581000 | 1.12144000  |
| H  | 1.24847300  | 4.82083500  | 1.65864500  |
| H  | 2.34324300  | 5.54526800  | 0.48841900  |
| C  | 4.30206300  | -3.48632400 | 0.79538300  |
| H  | 4.66189800  | -4.50832300 | 0.88110200  |
| H  | 0.76983500  | 2.35166500  | 1.55686000  |
| H  | 0.67087000  | 2.45941700  | -1.46301300 |
| O  | -0.31923700 | 0.16376600  | 2.13614400  |
| H  | 0.01206500  | -0.66886900 | 2.51476300  |
| H  | -1.31147200 | 0.16304600  | 2.19894700  |
| C  | -3.75448500 | -0.85353600 | 2.13253400  |
| C  | -3.51122800 | -0.42876100 | 3.51675500  |
| O  | -2.96076600 | 0.33198000  | 2.41796700  |
| H  | -3.14637700 | -1.66829500 | 1.74753300  |
| H  | -2.77684400 | -0.95228300 | 4.12716600  |
| H  | -4.29405600 | 0.08797400  | 4.06857200  |
| C  | -5.05846200 | -0.60182500 | 1.43064700  |
| H  | -4.88593900 | -0.37679900 | 0.37557300  |
| H  | -5.68969700 | -1.49473800 | 1.48430600  |
| H  | -5.59130800 | 0.23479400  | 1.89149400  |
| H  | 6.25575200  | -2.67715900 | 0.30705800  |
| H  | 2.25862200  | -4.01356400 | 1.24829100  |
| H  | -2.85269300 | -3.31456100 | -0.49747400 |
| H  | -5.35546900 | -0.93629800 | -3.09199900 |
| C  | 1.90565600  | -1.29496000 | -3.42216200 |
| H  | 2.69779400  | -1.93841200 | -3.02541800 |
| H  | 2.28286500  | -0.74326100 | -4.28424400 |
| H  | 1.07428400  | -1.94145400 | -3.71307200 |
| C  | 1.47207700  | -0.32381800 | -2.32972200 |
| O  | 0.79998100  | -0.93680400 | -1.39474100 |
| O  | 1.77805700  | 0.86818400  | -2.38000600 |

**II-m (PO + H<sub>2</sub>O-Co<sup>III</sup>-OAc)**

PO + H<sub>2</sub>O-Co<sup>III</sup>-OAc = PG + Co<sup>III</sup>(salen)-OAc

Charge: 0

Spin Multiplicity: 1

Sum of electronic and thermal Free Energies (a.u.): -1677.103566

Thermal correction to Gibbs Free Energy (a.u.): 0.472812

No imaginary frequency

Calculation of single point energy based on the optimized structure, Ep = -2915.9120222 a.u.

|   |             |             |             |
|---|-------------|-------------|-------------|
| C | -4.29801100 | -3.26411900 | -0.44018200 |
| C | -4.81827700 | -2.36444400 | -1.39502600 |

|    |             |             |             |
|----|-------------|-------------|-------------|
| C  | -3.11099500 | -3.00823700 | 0.21551400  |
| H  | -4.83891800 | -4.18057800 | -0.21951300 |
| C  | -4.11957900 | -1.20704900 | -1.66190200 |
| C  | -2.35882800 | -1.83030400 | -0.04862900 |
| C  | -2.89684000 | -0.91075300 | -1.01051400 |
| H  | -4.50226400 | -0.49201300 | -2.38676700 |
| O  | -1.25666800 | -1.64051300 | 0.61082600  |
| C  | -2.26528100 | 0.33760600  | -1.30003400 |
| Co | 0.04330800  | -0.34102000 | 0.19051700  |
| N  | -1.15471100 | 0.76388100  | -0.79105000 |
| H  | -2.79004000 | 0.98721100  | -2.00415000 |
| N  | 1.31734600  | 1.04004100  | -0.09270300 |
| C  | -0.55733800 | 2.03599800  | -1.23526900 |
| C  | 2.58848400  | 0.85542200  | -0.16850200 |
| C  | 0.63879500  | 2.31508600  | -0.31307400 |
| C  | -1.48730600 | 3.25054400  | -1.24265800 |
| H  | 3.22503600  | 1.68345300  | -0.48217300 |
| C  | 3.23967300  | -0.38845200 | 0.14490900  |
| C  | 1.46334800  | 3.48076700  | -0.85113700 |
| C  | -0.70873200 | 4.47513200  | -1.75160500 |
| H  | -1.86670700 | 3.42725200  | -0.22746900 |
| H  | -2.35657100 | 3.07679700  | -1.88485500 |
| C  | 4.59932900  | -0.54938500 | -0.19487100 |
| C  | 2.55510100  | -1.41977400 | 0.86236200  |
| C  | 0.56820300  | 4.72927100  | -0.93685400 |
| H  | 2.31909000  | 3.68592500  | -0.19820100 |
| H  | 1.85601400  | 3.21888900  | -1.84126100 |
| H  | -1.35010600 | 5.36255900  | -1.72902800 |
| H  | -0.43814900 | 4.30737700  | -2.80216900 |
| C  | 5.28966500  | -1.70178700 | 0.13335200  |
| H  | 5.09775600  | 0.25310300  | -0.73350700 |
| C  | 3.28856300  | -2.57940600 | 1.20114100  |
| O  | 1.30341600  | -1.31836000 | 1.25447200  |
| H  | 0.29115600  | 5.03548000  | 0.08087000  |
| H  | 1.13210000  | 5.56157400  | -1.37080700 |
| C  | 4.61916600  | -2.71552600 | 0.84091100  |
| H  | 5.15107800  | -3.62488800 | 1.10723200  |
| H  | 0.23206900  | 2.59511400  | 0.66916400  |
| H  | -0.15458200 | 1.85254400  | -2.23564900 |
| O  | -0.24991700 | 0.49857500  | 2.07050300  |
| H  | 0.47348400  | -0.10670500 | 2.35264200  |
| H  | -0.04595200 | 2.13910500  | 3.75281200  |
| C  | -1.42988300 | 0.22817800  | 2.88663500  |
| C  | -1.05804200 | 0.60555100  | 4.31964900  |
| O  | -0.70699500 | 1.97242000  | 4.43947300  |
| H  | -1.65204600 | -0.84060400 | 2.81677500  |
| H  | -0.24219300 | -0.05212800 | 4.66582200  |
| H  | -1.91669100 | 0.43507200  | 4.97680400  |
| C  | -2.57871300 | 1.04885400  | 2.33300100  |
| H  | -2.79720300 | 0.76447400  | 1.30487000  |
| H  | -3.47327300 | 0.87541900  | 2.93839600  |
| H  | -2.33936500 | 2.11432500  | 2.37651100  |
| H  | 6.33102100  | -1.82074400 | -0.14550900 |
| H  | 2.76546000  | -3.35978900 | 1.74316700  |
| H  | -2.70338300 | -3.70191400 | 0.94307600  |
| H  | -5.75050200 | -2.58059900 | -1.90514800 |
| C  | 1.44372400  | -2.12129600 | -3.29163400 |
| H  | 2.36156100  | -2.53386200 | -2.86007300 |
| H  | 1.63943200  | -1.78900000 | -4.31186100 |
| H  | 0.69183000  | -2.91370300 | -3.28210000 |
| C  | 0.99138200  | -0.94178100 | -2.43918800 |
| O  | 0.51100600  | -1.34947400 | -1.29424200 |
| O  | 1.11883800  | 0.21739600  | -2.83152800 |

### III-t (PO-Co<sup>III</sup>-OAc + H<sub>2</sub>O)

PO-Co<sup>III</sup>-OAc + H<sub>2</sub>O = PG + Co<sup>III</sup>(salen)-OAc

Charge: 0

Spin Multiplicity: 1

Sum of electronic and thermal Free Energies (a.u.): -1677.017369

Thermal correction to Gibbs Free Energy (a.u.): 0.466953

Imaginary frequencies: -388.10

Calculation of single point energy based on the optimized structure, Et = -2915.8250707 a.u.

|    |             |             |             |
|----|-------------|-------------|-------------|
| C  | -4.96565200 | -2.21737900 | -1.05806700 |
| C  | -5.49774600 | -0.91376300 | -1.13269300 |
| C  | -3.61671800 | -2.42830400 | -0.85428900 |
| H  | -5.62706600 | -3.07318500 | -1.16537500 |
| C  | -4.63938600 | 0.15847400  | -0.99968900 |
| H  | -6.55856400 | -0.75880600 | -1.29660400 |
| C  | -2.70710100 | -1.34213600 | -0.70782600 |
| H  | -3.20045900 | -3.42903400 | -0.80351400 |
| C  | -3.25258700 | -0.01860800 | -0.78289400 |
| H  | -5.02374800 | 1.17448500  | -1.05953000 |
| O  | -1.45456200 | -1.61506900 | -0.50605700 |
| C  | -2.43861400 | 1.15459600  | -0.66092200 |
| Co | -0.08972400 | -0.35682300 | -0.08052600 |
| N  | -1.17309300 | 1.18166200  | -0.41318800 |
| H  | -2.95927400 | 2.10351000  | -0.79805000 |
| N  | 1.26285900  | 0.88166100  | 0.42440600  |
| C  | -0.39532700 | 2.42773000  | -0.37781700 |
| C  | 2.52456000  | 0.62508500  | 0.38217400  |
| C  | 0.71330200  | 2.21725800  | 0.66944400  |
| C  | -1.16420100 | 3.71856700  | -0.10235100 |
| H  | 3.23062000  | 1.43990700  | 0.53733700  |
| C  | 3.09341100  | -0.66757700 | 0.12541800  |
| C  | 1.70126200  | 3.38149700  | 0.65046900  |
| C  | -0.19035800 | 4.90758300  | -0.08916200 |
| H  | -1.68685500 | 3.64248200  | 0.86177200  |
| H  | -1.92534300 | 3.88854700  | -0.87087200 |
| C  | 4.48812400  | -0.75959700 | -0.07495200 |
| C  | 2.28990400  | -1.85305200 | 0.12036400  |
| C  | 0.95437200  | 4.69832200  | 0.90906700  |
| H  | 2.47384300  | 3.24144100  | 1.41433000  |
| H  | 2.19499600  | 3.40649000  | -0.32813900 |
| H  | -0.73342100 | 5.82990500  | 0.14390800  |
| H  | 0.22830600  | 5.03201100  | -1.09588800 |
| C  | 5.10725300  | -1.97529100 | -0.29403900 |
| H  | 5.07266500  | 0.15749000  | -0.06343600 |
| C  | 2.95399800  | -3.08849400 | -0.09248300 |
| O  | 1.00564600  | -1.85726700 | 0.35297700  |
| H  | 0.54814900  | 4.68677500  | 1.92998300  |
| H  | 1.65590300  | 5.53799400  | 0.86149500  |
| C  | 4.32106700  | -3.14325800 | -0.29669000 |
| H  | 6.17773700  | -2.03026000 | -0.45943100 |
| H  | 2.34302900  | -3.98497700 | -0.10324500 |
| H  | 4.79393300  | -4.10668000 | -0.46890000 |
| C  | -1.19204300 | -1.60484500 | 2.26628200  |
| C  | -0.00789200 | -1.73015200 | 3.11093500  |
| O  | -0.79347000 | -0.33865600 | 1.74281300  |
| H  | -1.17585800 | -2.35216200 | 1.45976600  |
| H  | 0.93101700  | -1.88353700 | 2.59230000  |
| H  | -0.02517900 | -1.75946200 | 4.19470000  |
| C  | -2.55159600 | -1.54286800 | 2.93653800  |
| H  | -3.31109300 | -1.31783400 | 2.18427100  |
| H  | -2.79685300 | -2.50356200 | 3.40221500  |
| H  | -2.57552500 | -0.76068900 | 3.70256500  |
| O  | 0.63897400  | 0.43843600  | 3.70853200  |
| H  | 0.09470000  | 0.44428500  | 2.87552700  |
| H  | 0.05470000  | 0.78500100  | 4.39764200  |
| H  | 0.11820700  | 2.48297300  | -1.34448100 |
| H  | 0.23424000  | 2.18277500  | 1.65878500  |
| C  | 1.80819800  | -0.47844300 | -3.80535800 |
| H  | 2.59019200  | -1.16770500 | -3.46899800 |
| H  | 2.23253600  | 0.23082300  | -4.51745400 |
| H  | 1.02525900  | -1.07686600 | -4.27683600 |
| C  | 1.26225700  | 0.26003800  | -2.58760000 |
| O  | 0.50834500  | -0.51302400 | -1.86226500 |
| O  | 1.57037500  | 1.43764500  | -2.37641800 |

III-t (PO-Co<sup>III</sup>-OAc + H<sub>2</sub>O)

PO-Co<sup>III</sup>-OAc + H<sub>2</sub>O = PG + Co<sup>III</sup>(salen)-OAc

Charge: 0

Spin Multiplicity: 1

Sum of electronic and thermal Free Energies (a.u.): -1677.079596

Thermal correction to Gibbs Free Energy (a.u.): 0.469443

No imaginary frequency

Calculation of single point energy based on the optimized structure, Er = -2915.8856922 a.u.

|    |             |             |             |
|----|-------------|-------------|-------------|
| C  | -4.57560000 | -2.68435300 | -1.09253800 |
| C  | -5.19734300 | -1.43230600 | -1.28253100 |
| C  | -3.22061800 | -2.78281600 | -0.84742200 |
| H  | -5.17268100 | -3.59111000 | -1.14259600 |
| C  | -4.41978500 | -0.29463800 | -1.22456700 |
| H  | -6.26198400 | -1.36840900 | -1.47821200 |
| C  | -2.39195700 | -1.62577800 | -0.76695500 |
| H  | -2.73766700 | -3.74438400 | -0.70861200 |
| C  | -3.02829800 | -0.35502200 | -0.96470000 |
| H  | -4.87079900 | 0.68323500  | -1.38082600 |
| O  | -1.13266700 | -1.78884600 | -0.50947200 |
| C  | -2.30449500 | 0.87986900  | -0.90534600 |
| Co | 0.10211000  | -0.41059000 | -0.08469600 |
| N  | -1.05948600 | 1.01693700  | -0.59510400 |
| H  | -2.88468300 | 1.77711300  | -1.12028200 |
| N  | 1.28709200  | 0.95154600  | 0.49772400  |
| C  | -0.40543800 | 2.33313200  | -0.51852300 |
| C  | 2.56494000  | 0.80327100  | 0.59282600  |
| C  | 0.59495700  | 2.23468400  | 0.64891600  |
| C  | -1.32578000 | 3.53975900  | -0.33514500 |
| H  | 3.18223500  | 1.68255100  | 0.77481200  |
| C  | 3.25123800  | -0.45029500 | 0.47379500  |
| C  | 1.46277500  | 3.48761000  | 0.72640200  |
| C  | -0.48395400 | 4.82002800  | -0.21570100 |
| H  | -1.94733300 | 3.38833300  | 0.55698500  |
| H  | -2.00060800 | 3.64055900  | -1.19212700 |
| C  | 4.66281400  | -0.44786300 | 0.41725900  |
| C  | 2.53659500  | -1.69197100 | 0.48121300  |
| C  | 0.56287000  | 4.72077100  | 0.90022800  |
| H  | 2.16343100  | 3.42090300  | 1.56640900  |
| H  | 2.05200600  | 3.56830700  | -0.19500300 |
| H  | -1.14080600 | 5.67879900  | -0.04115000 |
| H  | 0.02602700  | 5.00060800  | -1.17088900 |
| C  | 5.38152500  | -1.62541100 | 0.35256000  |
| H  | 5.17856500  | 0.50959400  | 0.41620900  |
| C  | 3.30112000  | -2.88497500 | 0.43028300  |
| O  | 1.23738300  | -1.77473500 | 0.58315500  |
| H  | 0.05357200  | 4.65852100  | 1.87125000  |
| H  | 1.17739100  | 5.62691400  | 0.92485900  |
| C  | 4.68206600  | -2.84805700 | 0.36446200  |
| H  | 6.46451300  | -1.61092800 | 0.29645700  |
| H  | 2.75806500  | -3.82397600 | 0.43306800  |
| H  | 5.23614700  | -3.78167500 | 0.31481200  |
| C  | -1.09844700 | -1.66957200 | 2.38925300  |
| C  | -0.14241700 | -0.73034000 | 2.98690200  |
| O  | -0.81881500 | -0.37144600 | 1.74472000  |
| H  | -0.66473600 | -2.47568100 | 1.80583400  |
| H  | 0.91773700  | -0.91583000 | 2.85467100  |
| H  | -0.44423500 | -0.10126000 | 3.82041300  |
| C  | -2.51124000 | -1.83127300 | 2.86775500  |
| H  | -3.15221600 | -2.12834800 | 2.03240300  |
| H  | -2.55480200 | -2.61921200 | 3.62683200  |
| H  | -2.89343800 | -0.89918200 | 3.29142300  |
| O  | -3.03687800 | 1.41747000  | 2.08680000  |
| H  | -2.23469300 | 0.89707900  | 1.91725800  |
| H  | -3.68692500 | 0.99952000  | 1.50723700  |
| H  | 0.19546900  | 2.42954200  | -1.42823000 |
| H  | 0.00501800  | 2.15812800  | 1.57467000  |
| C  | 2.23511600  | -0.54372500 | -3.65255800 |
| H  | 3.05467500  | -1.16279600 | -3.27258900 |
| H  | 2.62989400  | 0.18035500  | -4.36642600 |
| H  | 1.51663400  | -1.20990700 | -4.13514500 |

|   |            |             |             |
|---|------------|-------------|-------------|
| C | 1.59272300 | 0.18275900  | -2.47615400 |
| O | 0.86049300 | -0.63356800 | -1.76764500 |
| O | 1.80871100 | 1.37840700  | -2.27297600 |

**III-t (PO-Co<sup>III</sup>-OAc + H<sub>2</sub>O)**

PO-Co<sup>III</sup>-OAc + H<sub>2</sub>O = PG + Co<sup>III</sup>(salen)-OAc

Charge: 0

Spin Multiplicity: 1

Sum of electronic and thermal Free Energies (a.u.): -1677.102502

Thermal correction to Gibbs Free Energy (a.u.): 0.473304

No imaginary frequency

Calculation of single point energy based on the optimized structure, Ep = -2915.9125099 a.u.

|    |             |             |             |
|----|-------------|-------------|-------------|
| C  | -4.96908200 | -1.92688700 | -1.36825700 |
| C  | -5.51698100 | -0.65246600 | -1.11193800 |
| C  | -3.60756400 | -2.14613700 | -1.31301700 |
| H  | -5.62991300 | -2.75345900 | -1.61640000 |
| C  | -4.66010200 | 0.38402900  | -0.80615200 |
| H  | -6.58835900 | -0.49178900 | -1.16161000 |
| C  | -2.69776200 | -1.09881500 | -0.98852800 |
| H  | -3.18144400 | -3.12298600 | -1.51623400 |
| C  | -3.25919300 | 0.19520400  | -0.73096800 |
| H  | -5.05500800 | 1.37922600  | -0.61285300 |
| O  | -1.43247900 | -1.37940000 | -0.94022600 |
| C  | -2.44366000 | 1.33013700  | -0.42099100 |
| Co | -0.07995700 | -0.25033500 | -0.23728700 |
| N  | -1.16505400 | 1.32070200  | -0.24350100 |
| H  | -2.97094200 | 2.28117900  | -0.33352400 |
| N  | 1.24503800  | 0.84495900  | 0.58355000  |
| C  | -0.38273200 | 2.53276300  | 0.02492300  |
| C  | 2.51039200  | 0.58533300  | 0.55241900  |
| C  | 0.69536700  | 2.12541000  | 1.04709400  |
| C  | -1.14836000 | 3.76488500  | 0.50203100  |
| H  | 3.20770300  | 1.34944100  | 0.89346900  |
| C  | 3.09171500  | -0.63858700 | 0.09286200  |
| C  | 1.69092900  | 3.26371500  | 1.26161800  |
| C  | -0.16546100 | 4.92079200  | 0.74550000  |
| H  | -1.69679300 | 3.53131200  | 1.42569400  |
| H  | -1.88785900 | 4.07132600  | -0.24530300 |
| C  | 4.50072600  | -0.71876700 | -0.00010700 |
| C  | 2.28774200  | -1.78618800 | -0.21019800 |
| C  | 0.94758800  | 4.52603700  | 1.72338500  |
| H  | 2.44021100  | 2.98614600  | 2.01121600  |
| H  | 2.21336500  | 3.44837800  | 0.31588300  |
| H  | -0.70673700 | 5.79607200  | 1.12038100  |
| H  | 0.28315000  | 5.21152000  | -0.21279000 |
| C  | 5.13257400  | -1.88205500 | -0.38907100 |
| H  | 5.08416100  | 0.16783700  | 0.23733400  |
| C  | 2.96734600  | -2.97375600 | -0.59288400 |
| O  | 0.99125200  | -1.81211500 | -0.10744800 |
| H  | 0.51157100  | 4.34500600  | 2.71559800  |
| H  | 1.65842800  | 5.35079100  | 1.84054800  |
| C  | 4.34549000  | -3.01467700 | -0.68116800 |
| H  | 6.21337300  | -1.92710100 | -0.46657300 |
| H  | 2.35753500  | -3.84037800 | -0.82503700 |
| H  | 4.83030100  | -3.93777700 | -0.98809500 |
| C  | -1.13552100 | -2.07665700 | 1.89935100  |
| C  | 0.00988000  | -2.57726700 | 2.78261400  |
| O  | -0.84077600 | -0.68399700 | 1.58902500  |
| H  | -1.12789700 | -2.60741700 | 0.94767300  |
| H  | 0.90207100  | -2.70271000 | 2.17018700  |
| H  | -0.24788500 | -3.53569600 | 3.24973000  |
| C  | -2.51251500 | -2.13452300 | 2.54398700  |
| H  | -3.25444700 | -1.69163900 | 1.87592200  |
| H  | -2.79781200 | -3.17370100 | 2.73791300  |
| H  | -2.53628000 | -1.58454200 | 3.49272900  |
| O  | 0.34717900  | -1.58545200 | 3.76533600  |
| H  | -0.22991200 | -0.39955500 | 2.29633400  |
| H  | -0.34195900 | -1.58414900 | 4.44303400  |
| H  | 0.15841700  | 2.75645300  | -0.90064700 |
| H  | 0.17929200  | 1.92522300  | 2.00055200  |



|   |            |             |             |
|---|------------|-------------|-------------|
| C | 1.84968500 | 0.42562600  | -3.86835500 |
| H | 2.58739300 | -0.37100000 | -3.72553300 |
| H | 2.31741200 | 1.26473400  | -4.38509600 |
| H | 1.03276600 | 0.01209200  | -4.46403600 |
| C | 1.34627700 | 0.86965600  | -2.49928000 |
| O | 0.54761000 | -0.02083900 | -1.98243200 |
| O | 1.71400900 | 1.94002000  | -2.00716400 |

### III-m (PO-Co<sup>III</sup>-OAc + H<sub>2</sub>O)

PO-Co<sup>III</sup>-OAc + H<sub>2</sub>O = PG + Co<sup>III</sup>(salen)-OAc

Charge: 0

Spin Multiplicity: 1

Sum of electronic and thermal Free Energies (a.u.): -1677.023674

Thermal correction to Gibbs Free Energy (a.u.): 0.466096

Imaginary frequencies: -285.16

Calculation of single point energy based on the optimized structure, Et = -2915.8352559 a.u.

|    |             |             |             |
|----|-------------|-------------|-------------|
| C  | -4.76669500 | -2.89689800 | -0.55252100 |
| C  | -5.43191900 | -1.68330800 | -0.82474500 |
| C  | -3.40378000 | -2.93290100 | -0.34061100 |
| H  | -5.33569900 | -3.82219000 | -0.51182500 |
| C  | -4.69021400 | -0.52109300 | -0.87708100 |
| C  | -2.60984500 | -1.75007100 | -0.38779100 |
| C  | -3.29183900 | -0.51679500 | -0.66118600 |
| H  | -5.17922100 | 0.42736100  | -1.08960900 |
| O  | -1.33620500 | -1.86146000 | -0.18024100 |
| C  | -2.61039300 | 0.74155800  | -0.73214300 |
| Co | -0.10933700 | -0.42108400 | -0.03945100 |
| N  | -1.35155100 | 0.93988900  | -0.53123500 |
| H  | -3.23596500 | 1.60046300  | -0.98083700 |
| N  | 1.13193500  | 0.99850900  | 0.21150200  |
| C  | -0.71725700 | 2.25868500  | -0.66791300 |
| C  | 2.40841800  | 0.86471500  | 0.11070000  |
| C  | 0.45095600  | 2.28800400  | 0.33715000  |
| C  | -1.61575300 | 3.48050600  | -0.48272800 |
| H  | 3.03294000  | 1.75788900  | 0.10808400  |
| C  | 3.09276600  | -0.39351800 | -0.01393000 |
| C  | 1.30036800  | 3.54065200  | 0.13447300  |
| C  | -0.78492700 | 4.76304900  | -0.64746100 |
| H  | -2.08024900 | 3.45180400  | 0.51311100  |
| H  | -2.42628700 | 3.48294600  | -1.21877100 |
| C  | 4.47202300  | -0.38377200 | -0.31364000 |
| C  | 2.41663100  | -1.63741600 | 0.20614900  |
| C  | 0.42172500  | 4.78999200  | 0.29833500  |
| H  | 2.12071500  | 3.57104800  | 0.86037300  |
| H  | 1.74155400  | 3.51090200  | -0.86904100 |
| H  | -1.41852300 | 5.64058400  | -0.47859300 |
| H  | -0.43088400 | 4.82286200  | -1.68453800 |
| C  | 5.19614200  | -1.55666800 | -0.41610100 |
| H  | 4.95873700  | 0.57538200  | -0.47547000 |
| C  | 3.18747300  | -2.82371800 | 0.10954500  |
| O  | 1.15888400  | -1.72047600 | 0.54680000  |
| H  | 0.06825700  | 4.84520600  | 1.33695700  |
| H  | 1.01975600  | 5.69049900  | 0.12211100  |
| C  | 4.53601100  | -2.78060200 | -0.19668800 |
| H  | 5.09276300  | -3.71079200 | -0.27535500 |
| H  | 0.02479200  | 2.31236100  | 1.34983200  |
| H  | -0.25594000 | 2.26378000  | -1.66171400 |
| O  | -0.81962000 | 1.45782700  | 3.70562900  |
| H  | -1.71682400 | 1.66101000  | 4.00188600  |
| H  | -0.92379400 | 1.03923000  | 2.80585900  |
| C  | -0.07068500 | -0.89118700 | 3.68589600  |
| C  | -0.88660600 | -1.35588700 | 2.55216200  |
| O  | -0.80247200 | -0.19305000 | 1.76365300  |
| H  | -0.51008000 | -0.75502000 | 4.67133300  |
| H  | -1.92029100 | -1.60497400 | 2.82170300  |
| H  | -0.42333800 | -2.21611100 | 2.04410900  |
| C  | 1.36599500  | -0.62325000 | 3.55622700  |
| H  | 1.57565100  | 0.41163100  | 3.85076600  |
| H  | 1.88383900  | -1.25257400 | 4.29811600  |

|   |             |             |             |
|---|-------------|-------------|-------------|
| H | 1.72575100  | -0.82764400 | 2.55107600  |
| H | 6.25270600  | -1.53580200 | -0.66034400 |
| H | 2.67261400  | -3.76466600 | 0.27217600  |
| H | -2.88507800 | -3.86451100 | -0.13984400 |
| H | -6.50317600 | -1.66647700 | -0.99355700 |
| C | 1.59596700  | -0.87444800 | -3.83696100 |
| H | 2.47311200  | -1.42062200 | -3.47364400 |
| H | 1.88965000  | -0.22679500 | -4.66433400 |
| H | 0.86382000  | -1.61461100 | -4.16811600 |
| C | 1.03666600  | -0.04077500 | -2.68813900 |
| O | 0.43421200  | -0.78671600 | -1.80973700 |
| O | 1.20654100  | 1.18252500  | -2.65917700 |

### III-m (PO-Co<sup>III</sup>-OAc + H<sub>2</sub>O)

PO-Co<sup>III</sup>-OAc + H<sub>2</sub>O = PG + Co<sup>III</sup>(salen)-OAc

Charge: 0

Spin Multiplicity: 1

Sum of electronic and thermal Free Energies (a.u.): -1677.075382

Thermal correction to Gibbs Free Energy (a.u.): 0.467577

No imaginary frequency

Calculation of single point energy based on the optimized structure, Er = -2915.8828288 a.u.

|    |             |             |             |
|----|-------------|-------------|-------------|
| C  | -4.51310500 | -3.15312800 | -0.43591400 |
| C  | -5.21436400 | -2.00066500 | -0.85047700 |
| C  | -3.16227400 | -3.10991600 | -0.15894300 |
| H  | -5.04540300 | -4.09533400 | -0.33504700 |
| C  | -4.51959900 | -0.81701500 | -0.97959300 |
| C  | -2.41655600 | -1.90146300 | -0.27579000 |
| C  | -3.13245400 | -0.73247900 | -0.70002900 |
| H  | -5.03321500 | 0.08512700  | -1.30541300 |
| O  | -1.15526400 | -1.92862300 | 0.02042700  |
| C  | -2.50028400 | 0.54411700  | -0.83888600 |
| Co | 0.02862300  | -0.45088900 | 0.02724600  |
| N  | -1.26452600 | 0.81556700  | -0.58221000 |
| H  | -3.14770300 | 1.35609300  | -1.17026900 |
| N  | 1.18511400  | 1.03774200  | 0.21369600  |
| C  | -0.71317600 | 2.17282800  | -0.73932800 |
| C  | 2.47016700  | 0.96646500  | 0.14261900  |
| C  | 0.42605900  | 2.28631600  | 0.28939000  |
| C  | -1.70078700 | 3.32769100  | -0.56603100 |
| H  | 3.04619600  | 1.89078700  | 0.10026700  |
| C  | 3.21370400  | -0.25997000 | 0.12252900  |
| C  | 1.19751500  | 3.58942100  | 0.10590500  |
| C  | -0.95903300 | 4.66767600  | -0.69749800 |
| H  | -2.19784800 | 3.23458800  | 0.40809300  |
| H  | -2.48158200 | 3.28440200  | -1.33268900 |
| C  | 4.60091900  | -0.20725700 | -0.13983300 |
| C  | 2.59017200  | -1.51321600 | 0.43326100  |
| C  | 0.23062000  | 4.77323100  | 0.26498800  |
| H  | 2.00464300  | 3.66796800  | 0.84330900  |
| H  | 1.65523100  | 3.59783800  | -0.89077200 |
| H  | -1.65644000 | 5.49440700  | -0.52569100 |
| H  | -0.59462000 | 4.77081700  | -1.72797100 |
| C  | 5.38081300  | -1.34670100 | -0.11870200 |
| H  | 5.04696900  | 0.75759200  | -0.36980700 |
| C  | 3.41975700  | -2.66303800 | 0.46544100  |
| O  | 1.32691100  | -1.63524100 | 0.74096400  |
| H  | -0.13958000 | 4.79522100  | 1.29878300  |
| H  | 0.76616000  | 5.71460500  | 0.10280100  |
| C  | 4.77277100  | -2.57868900 | 0.19274600  |
| H  | 5.37587400  | -3.48251400 | 0.21425900  |
| H  | -0.04039000 | 2.29650300  | 1.28632500  |
| H  | -0.24187900 | 2.19979600  | -1.72657600 |
| O  | -3.16143100 | 1.33218600  | 2.10001400  |
| H  | -3.83374500 | 0.81586200  | 1.63785200  |
| H  | -2.34159700 | 0.84887700  | 1.90612800  |
| C  | -0.17639800 | -0.02903000 | 3.28468200  |
| C  | -0.80076600 | -1.28012700 | 2.83188700  |
| O  | -0.74438600 | -0.13829500 | 1.93131500  |
| H  | -0.79648000 | 0.63958800  | 3.88059100  |
| H  | -1.81346800 | -1.52883400 | 3.13528500  |

|   |             |             |             |
|---|-------------|-------------|-------------|
| H | -0.16429600 | -2.09418700 | 2.50043500  |
| C | 1.30759600  | 0.14175500  | 3.42464300  |
| H | 1.60653100  | 1.16120200  | 3.16569800  |
| H | 1.58286200  | -0.03407800 | 4.47018800  |
| H | 1.84095500  | -0.56063600 | 2.78701000  |
| H | 6.44249200  | -1.29529600 | -0.33418400 |
| H | 2.94619400  | -3.61035000 | 0.69990800  |
| H | -2.61845500 | -3.99536800 | 0.15287300  |
| H | -6.27564500 | -2.04864000 | -1.06806000 |
| C | 1.66806600  | -1.08307700 | -3.73718300 |
| H | 2.58104500  | -1.57586700 | -3.38680600 |
| H | 1.89898100  | -0.46973200 | -4.60905300 |
| H | 0.95054800  | -1.86538500 | -3.99445900 |
| C | 1.12974200  | -0.20512900 | -2.61295600 |
| O | 0.58612500  | -0.93452100 | -1.67505200 |
| O | 1.25630800  | 1.01876800  | -2.64399500 |

### III-m (PO-Co<sup>III</sup>-OAc + H<sub>2</sub>O)

PO-Co<sup>III</sup>-OAc + H<sub>2</sub>O = PG + Co<sup>III</sup>(salen)-OAc

Charge: 0

Spin Multiplicity: 1

Sum of electronic and thermal Free Energies (a.u.): -1677.099301

Thermal correction to Gibbs Free Energy (a.u.): 0.473275

No imaginary frequency

Calculation of single point energy based on the optimized structure, E<sub>p</sub> = -2915.9110832 a.u.

|    |             |             |             |
|----|-------------|-------------|-------------|
| C  | -4.84971300 | -2.65542000 | -0.97420900 |
| C  | -5.54299700 | -1.44222200 | -0.77424700 |
| C  | -3.47166100 | -2.70664900 | -0.94768100 |
| H  | -5.41113000 | -3.56823800 | -1.15645300 |
| C  | -4.81217000 | -0.29501900 | -0.55227000 |
| C  | -2.68715700 | -1.53976200 | -0.71367100 |
| C  | -3.39622400 | -0.30848300 | -0.51153400 |
| H  | -5.32054200 | 0.65530300  | -0.40287300 |
| O  | -1.39803300 | -1.66376800 | -0.69974900 |
| C  | -2.72249600 | 0.93304400  | -0.29142100 |
| Co | -0.16449700 | -0.31312200 | -0.21503600 |
| N  | -1.44586800 | 1.09919900  | -0.17716900 |
| H  | -3.36494300 | 1.81203600  | -0.22006000 |
| N  | 1.07765700  | 0.99354000  | 0.40041300  |
| C  | -0.81975500 | 2.41844600  | -0.02286500 |
| C  | 2.35509700  | 0.90696400  | 0.22753800  |
| C  | 0.40909600  | 2.20770200  | 0.88106600  |
| C  | -1.69845700 | 3.54788600  | 0.51171900  |
| H  | 2.97208700  | 1.77643100  | 0.45107200  |
| C  | 3.04728900  | -0.25490500 | -0.24074200 |
| C  | 1.25074300  | 3.48039900  | 0.94988100  |
| C  | -0.87162100 | 4.83924100  | 0.61553800  |
| H  | -2.10313400 | 3.27333800  | 1.49628100  |
| H  | -2.55193200 | 3.72056900  | -0.15197000 |
| C  | 4.43648900  | -0.15494100 | -0.48766500 |
| C  | 2.38199200  | -1.51589000 | -0.39284500 |
| C  | 0.39020800  | 4.64422400  | 1.46459800  |
| H  | 2.11085100  | 3.34009700  | 1.61380300  |
| H  | 1.63262700  | 3.69744100  | -0.05440800 |
| H  | -1.48818600 | 5.64273600  | 1.03251500  |
| H  | -0.58089100 | 5.15442600  | -0.39456600 |
| C  | 5.17914000  | -1.24857900 | -0.88244100 |
| H  | 4.91361600  | 0.81446400  | -0.36309400 |
| C  | 3.17619100  | -2.62709600 | -0.78472900 |
| O  | 1.12133000  | -1.70551600 | -0.14178100 |
| H  | 0.10035400  | 4.44427400  | 2.50540700  |
| H  | 0.98347300  | 5.56458900  | 1.47728500  |
| C  | 4.53010700  | -2.49236600 | -1.02377000 |
| H  | 5.10368500  | -3.36245100 | -1.33247700 |
| H  | 0.03619500  | 1.98534500  | 1.89539700  |
| H  | -0.41908200 | 2.68226700  | -1.00739400 |
| O  | 0.08086500  | -0.95527500 | 4.19581700  |
| H  | -0.75882700 | -1.13949900 | 4.63939900  |
| H  | -0.42212000 | -0.17291200 | 2.40429700  |
| C  | 0.40388200  | -2.08364600 | 3.35375200  |

|   |             |             |             |
|---|-------------|-------------|-------------|
| C | -0.58727500 | -2.09945400 | 2.18621700  |
| O | -0.72654800 | -0.75503600 | 1.68475500  |
| H | 0.29240600  | -3.02004400 | 3.91811400  |
| H | -1.57852700 | -2.43037800 | 2.52008100  |
| H | -0.25225700 | -2.72394900 | 1.35952300  |
| C | 1.85464300  | -1.90332300 | 2.93851000  |
| H | 2.49288000  | -1.88273500 | 3.82525700  |
| H | 2.17082000  | -2.71676400 | 2.28286000  |
| H | 1.98454800  | -0.96786300 | 2.39146500  |
| H | 6.24187400  | -1.15623300 | -1.07794800 |
| H | 2.67117500  | -3.58025800 | -0.89983800 |
| H | -2.93488400 | -3.63546200 | -1.10943000 |
| H | -6.62685000 | -1.41473100 | -0.80135200 |
| C | 1.21552300  | 0.42312600  | -4.07819200 |
| H | 2.07430100  | -0.25242100 | -4.00581800 |
| H | 1.48759300  | 1.29256800  | -4.67810700 |
| H | 0.40145000  | -0.13194700 | -4.54977500 |
| C | 0.82345400  | 0.86191500  | -2.67142100 |
| O | 0.23759100  | -0.10702600 | -2.02595000 |
| O | 1.08433400  | 1.99836900  | -2.26792100 |

#### IV-t (PO-Co<sup>III</sup>-OAc + H<sub>2</sub>O-Co<sup>III</sup>-OAc)

PO-Co<sup>III</sup>-OAc + H<sub>2</sub>O-Co<sup>III</sup>-OAc = PG + 2Co<sup>III</sup>(salen)-OAc

Charge: 0

Spin Multiplicity: 1

Sum of electronic and thermal Free Energies (a.u.): -3084.637713

Thermal correction to Gibbs Free Energy (a.u.): 0.861507

Imaginary frequencies: -378.12

Calculation of single point energy based on the optimized structure, Et = -5562.0327052 a.u.

|    |             |             |             |
|----|-------------|-------------|-------------|
| C  | 0.89954800  | 1.20020300  | -2.31699000 |
| C  | 0.15241900  | 2.15233600  | -1.48245200 |
| O  | 1.17245900  | 0.32944900  | -1.22110700 |
| H  | 0.22001300  | 0.67025000  | -2.99140300 |
| H  | -0.91538300 | 2.33155200  | -1.60125900 |
| H  | 0.74028400  | 2.69159900  | -0.74222900 |
| C  | 2.09383700  | 1.75140400  | -3.08489200 |
| H  | 2.65731900  | 0.91748100  | -3.51268100 |
| H  | 1.74103500  | 2.37797300  | -3.91090800 |
| H  | 2.74947200  | 2.33456300  | -2.44231600 |
| O  | -0.93001500 | 0.71497800  | -0.02319300 |
| H  | -0.20781400 | 0.20523500  | -0.50681800 |
| H  | -0.45377500 | 0.95250200  | 0.81338600  |
| C  | -0.27757700 | -3.40884000 | -3.80140100 |
| C  | -0.45956300 | -4.44987400 | -2.86781900 |
| C  | -0.69854200 | -2.12146400 | -3.52985200 |
| H  | 0.19269200  | -3.62300100 | -4.75770300 |
| C  | -1.05410500 | -4.15250700 | -1.65799400 |
| H  | -0.13544300 | -5.45942700 | -3.09508300 |
| C  | -1.34191000 | -1.78913600 | -2.30222500 |
| H  | -0.58350600 | -1.32700500 | -4.25985000 |
| C  | -1.49239100 | -2.84476600 | -1.34287100 |
| H  | -1.19361500 | -4.93349400 | -0.91379300 |
| O  | -1.73293000 | -0.56684800 | -2.11916500 |
| C  | -2.06743600 | -2.62615700 | -0.04799900 |
| Co | -2.71573400 | 0.09305500  | -0.61605200 |
| N  | -2.54415400 | -1.51513100 | 0.40272600  |
| H  | -2.09621700 | -3.49949000 | 0.60603700  |
| N  | -3.55057700 | 0.81464100  | 0.92100000  |
| C  | -3.20279100 | -1.43134400 | 1.71964500  |
| C  | -4.41673000 | 1.76815800  | 0.89202700  |
| C  | -3.20272600 | 0.05160100  | 2.12157500  |
| C  | -2.60144800 | -2.27783300 | 2.84087700  |
| H  | -4.95568000 | 2.01218000  | 1.80715000  |
| C  | -4.73517900 | 2.54959700  | -0.26860000 |
| C  | -4.07291600 | 0.26446700  | 3.35800100  |
| C  | -3.41938100 | -2.07668500 | 4.12703700  |
| H  | -1.55682400 | -1.98954700 | 3.00281200  |
| H  | -2.61038900 | -3.34084500 | 2.57835600  |
| C  | -5.83179000 | 3.43727600  | -0.20530500 |

|    |             |             |             |
|----|-------------|-------------|-------------|
| C  | -3.92124400 | 2.49970600  | -1.44617500 |
| C  | -3.53753700 | -0.59675700 | 4.51288400  |
| H  | -4.06763000 | 1.31879900  | 3.65641000  |
| H  | -5.10712500 | -0.00908400 | 3.11589800  |
| H  | -2.95919600 | -2.63955400 | 4.94631700  |
| H  | -4.42350900 | -2.49461600 | 3.97796800  |
| C  | -6.15520700 | 4.26018800  | -1.26670900 |
| H  | -6.42871800 | 3.45655000  | 0.70360800  |
| C  | -4.26574400 | 3.36888200  | -2.51264900 |
| O  | -2.86585600 | 1.74046200  | -1.56358900 |
| H  | -2.54798000 | -0.22477300 | 4.80059800  |
| H  | -4.18715100 | -0.48650100 | 5.38789800  |
| C  | -5.35319800 | 4.21880300  | -2.42340100 |
| H  | -7.00743200 | 4.92857000  | -1.21017400 |
| H  | -3.65139500 | 3.32868300  | -3.40608500 |
| H  | -5.59453600 | 4.86218500  | -3.26548200 |
| C  | 0.08445200  | 0.11647200  | 4.91525800  |
| C  | 0.40048600  | -1.24954500 | 5.00849300  |
| C  | 0.32143000  | 0.82771500  | 3.74907300  |
| H  | -0.34564200 | 0.62840400  | 5.77171200  |
| C  | 0.96245100  | -1.87750600 | 3.91028200  |
| H  | 0.21192900  | -1.79908200 | 5.92404600  |
| C  | 0.91227000  | 0.21228000  | 2.62018400  |
| H  | 0.08921200  | 1.88513700  | 3.67617700  |
| C  | 1.23365700  | -1.17650300 | 2.71606200  |
| H  | 1.21476000  | -2.93415500 | 3.95747000  |
| O  | 1.08002800  | 0.92310900  | 1.52638900  |
| C  | 1.83526300  | -1.90331800 | 1.62764900  |
| Co | 2.49850300  | 0.49285000  | 0.25350300  |
| N  | 2.29108900  | -1.38969200 | 0.54015500  |
| H  | 1.94281500  | -2.98143400 | 1.77301700  |
| N  | 3.83181400  | -0.00162400 | -0.98403100 |
| C  | 3.06942600  | -2.21714600 | -0.40002600 |
| C  | 4.87449500  | 0.70451400  | -1.24210800 |
| C  | 3.51073000  | -1.30642700 | -1.55292500 |
| C  | 2.33812100  | -3.42640600 | -0.97613300 |
| H  | 5.65425200  | 0.27880100  | -1.87537600 |
| C  | 5.07275800  | 2.04582900  | -0.76193000 |
| C  | 4.54554500  | -2.01430400 | -2.41888300 |
| C  | 3.28854400  | -4.18784900 | -1.91430100 |
| H  | 1.45182100  | -3.08729700 | -1.51881700 |
| H  | 1.99084900  | -4.09329400 | -0.17954100 |
| C  | 6.33885500  | 2.64565100  | -0.93524600 |
| C  | 3.99369400  | 2.80241300  | -0.19360800 |
| C  | 3.88798700  | -3.28079200 | -3.00129500 |
| H  | 4.88093700  | -1.36427000 | -3.23530100 |
| H  | 5.42593500  | -2.27215500 | -1.81722300 |
| H  | 2.75164100  | -5.01967900 | -2.38218600 |
| H  | 4.10210300  | -4.62547600 | -1.32061000 |
| C  | 6.57728400  | 3.95179500  | -0.55228500 |
| H  | 7.13597300  | 2.05054500  | -1.37494200 |
| C  | 4.26321300  | 4.14473600  | 0.17070300  |
| O  | 2.77655900  | 2.34139100  | -0.05222600 |
| H  | 3.08694900  | -2.97381600 | -3.68656700 |
| H  | 4.61724400  | -3.83987400 | -3.59702800 |
| C  | 5.51958900  | 4.69846100  | -0.00036400 |
| H  | 7.55846500  | 4.39595500  | -0.67957800 |
| H  | 3.44746000  | 4.71601800  | 0.60097800  |
| H  | 5.69128700  | 5.72805900  | 0.30210700  |
| H  | 3.96824100  | -2.51903500 | 0.14500800  |
| H  | 2.61706300  | -1.12761500 | -2.16302500 |
| H  | -4.24874500 | -1.70210700 | 1.54340200  |
| H  | -2.16764400 | 0.32448300  | 2.37407200  |
| C  | -6.50592100 | -0.89827000 | -2.02808700 |
| H  | -6.76647900 | 0.10587300  | -2.37899600 |
| H  | -7.39621600 | -1.38270600 | -1.62496400 |
| H  | -6.11826900 | -1.45490800 | -2.88438700 |
| C  | -5.44319300 | -0.77062700 | -0.94242000 |
| O  | -4.28282800 | -0.46576900 | -1.45532100 |

|   |             |             |            |
|---|-------------|-------------|------------|
| O | -5.72750600 | -0.92288900 | 0.24669900 |
| C | 5.49463700  | 0.50518700  | 3.16181800 |
| H | 6.27070400  | -0.19331000 | 3.47702600 |
| H | 4.81429300  | 0.72063800  | 3.98966500 |
| H | 5.95324900  | 1.45245300  | 2.86032900 |
| C | 4.72359300  | -0.06746800 | 1.97820300 |
| O | 3.67252400  | 0.65599700  | 1.70533700 |
| O | 5.11129300  | -1.07620900 | 1.38815100 |

**IV-t (PO-Co<sup>III</sup>-OAc + H<sub>2</sub>O-Co<sup>III</sup>-OAc)**

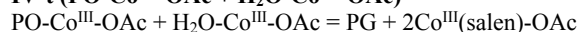

Charge: 0

Spin Multiplicity: 1

Sum of electronic and thermal Free Energies (a.u.): -3084.698173

Thermal correction to Gibbs Free Energy (a.u.): 0.861695

No imaginary frequency

Calculation of single point energy based on the optimized structure, Er = -5562.0951037 a.u.

|    |             |             |             |
|----|-------------|-------------|-------------|
| C  | 1.14771700  | -0.14735100 | -2.70198300 |
| C  | 0.89724300  | 1.24896500  | -2.33172400 |
| O  | 1.20289800  | 0.26579300  | -1.28042400 |
| H  | 0.26150300  | -0.76100900 | -2.84159800 |
| H  | -0.13213200 | 1.59348800  | -2.29027200 |
| H  | 1.69532400  | 1.97565500  | -2.43877800 |
| C  | 2.42015300  | -0.59859000 | -3.35455500 |
| H  | 2.67805800  | -1.61775300 | -3.05318400 |
| H  | 2.26436700  | -0.60259600 | -4.43913700 |
| H  | 3.24703600  | 0.06943200  | -3.11787000 |
| O  | -0.94922300 | 0.50740100  | 0.24324100  |
| H  | -0.18076900 | 0.18701200  | -0.29114100 |
| H  | -0.94750500 | 1.46580100  | 0.10110600  |
| C  | -0.43138700 | -4.88158400 | -1.90603800 |
| C  | -0.94251400 | -5.49392100 | -0.74461000 |
| C  | -0.61770000 | -3.53340400 | -2.14606900 |
| H  | 0.11601500  | -5.47896000 | -2.63042900 |
| C  | -1.64414700 | -4.71635100 | 0.15528100  |
| H  | -0.79139300 | -6.55250700 | -0.56527600 |
| C  | -1.33937400 | -2.70622600 | -1.23929400 |
| H  | -0.23641600 | -3.07041000 | -3.05001700 |
| C  | -1.86126800 | -3.33593900 | -0.06139200 |
| H  | -2.04644700 | -5.16282200 | 1.06182800  |
| O  | -1.45409300 | -1.44105300 | -1.50874400 |
| C  | -2.54681600 | -2.59915100 | 0.96209100  |
| Co | -2.58664800 | -0.21365200 | -0.58783100 |
| N  | -2.83981200 | -1.34513000 | 0.92962400  |
| H  | -2.82715000 | -3.17258800 | 1.84829700  |
| N  | -3.56926700 | 1.07693300  | 0.39171800  |
| C  | -3.59356000 | -0.69950800 | 2.02073600  |
| C  | -4.30144000 | 1.99116400  | -0.14454700 |
| C  | -3.45771800 | 0.81940100  | 1.82676700  |
| C  | -3.17199800 | -1.06535800 | 3.44474800  |
| H  | -4.94733500 | 2.59108100  | 0.49709000  |
| C  | -4.31323900 | 2.28847900  | -1.54939200 |
| C  | -4.40725200 | 1.56547500  | 2.75860000  |
| C  | -4.07206300 | -0.31951900 | 4.44457000  |
| H  | -2.11949100 | -0.78854500 | 3.59196500  |
| H  | -3.25293200 | -2.14302400 | 3.61902600  |
| C  | -5.30233700 | 3.15965100  | -2.05456100 |
| C  | -3.28394300 | 1.79255500  | -2.41453300 |
| C  | -4.06447400 | 1.19804800  | 4.21219000  |
| H  | -4.30605900 | 2.64783600  | 2.62219200  |
| H  | -5.44319900 | 1.29263100  | 2.52219700  |
| H  | -3.75600300 | -0.54363200 | 5.46917400  |
| H  | -5.09783000 | -0.69668700 | 4.34121200  |
| C  | -5.31667000 | 3.53758300  | -3.38373000 |
| H  | -6.06582600 | 3.52665400  | -1.37253300 |
| C  | -3.31143200 | 2.21453400  | -3.76651400 |
| O  | -2.30458200 | 1.02620900  | -2.00628600 |
| H  | -3.06831000 | 1.59496000  | 4.44254800  |
| H  | -4.76735900 | 1.68621500  | 4.89555000  |
| C  | -4.30331500 | 3.05801100  | -4.23499900 |

|    |             |             |             |
|----|-------------|-------------|-------------|
| H  | -6.08978800 | 4.19636200  | -3.76387100 |
| H  | -2.53270500 | 1.83900400  | -4.42198600 |
| H  | -4.30029600 | 3.35108100  | -5.28152300 |
| C  | -0.42144000 | 3.96561600  | 2.87822100  |
| C  | -0.58863400 | 3.00180800  | 3.89331600  |
| C  | 0.32245300  | 3.69300400  | 1.74559700  |
| H  | -0.87697200 | 4.94594200  | 2.99013500  |
| C  | -0.00631400 | 1.75977300  | 3.72704200  |
| H  | -1.15874200 | 3.23327100  | 4.78635800  |
| C  | 0.95088800  | 2.42986900  | 1.55520600  |
| H  | 0.46153100  | 4.43625500  | 0.96756400  |
| C  | 0.75399300  | 1.44286000  | 2.57844700  |
| H  | -0.13508300 | 0.99141100  | 4.48630700  |
| O  | 1.60106800  | 2.22487600  | 0.45002200  |
| C  | 1.19691900  | 0.09126900  | 2.41903900  |
| Co | 2.70180900  | 0.71613000  | 0.08852600  |
| N  | 1.85404500  | -0.37866900 | 1.41216400  |
| H  | 0.92043200  | -0.59863900 | 3.21951700  |
| N  | 3.65295200  | -0.85319400 | -0.37186000 |
| C  | 2.31168500  | -1.78110400 | 1.40088800  |
| C  | 4.84798800  | -0.86215100 | -0.85241700 |
| C  | 2.89141300  | -2.04289500 | 0.00455900  |
| C  | 1.24973700  | -2.83386300 | 1.71671900  |
| H  | 5.37103000  | -1.81442000 | -0.94360400 |
| C  | 5.54251500  | 0.30984700  | -1.30234900 |
| C  | 3.60486100  | -3.39071600 | -0.03062600 |
| C  | 1.88740500  | -4.23181700 | 1.66381700  |
| H  | 0.43502500  | -2.76150500 | 0.98968400  |
| H  | 0.81377700  | -2.66748900 | 2.70766400  |
| C  | 6.91007600  | 0.20105700  | -1.64015300 |
| C  | 4.85396400  | 1.55421600  | -1.49134800 |
| C  | 2.59544000  | -4.49532100 | 0.32703600  |
| H  | 4.02241100  | -3.58182900 | -1.02601300 |
| H  | 4.43871500  | -3.37831400 | 0.68209700  |
| H  | 1.11656700  | -4.99209400 | 1.82596000  |
| H  | 2.61100200  | -4.32474800 | 2.48448500  |
| C  | 7.61592900  | 1.27777500  | -2.13921900 |
| H  | 7.40414000  | -0.75631300 | -1.49113900 |
| C  | 5.60076800  | 2.63630800  | -2.02349100 |
| O  | 3.58072100  | 1.72270200  | -1.25427000 |
| H  | 1.84087600  | -4.55616900 | -0.46522900 |
| H  | 3.10327300  | -5.46534200 | 0.35664500  |
| C  | 6.94144100  | 2.49948500  | -2.33247800 |
| H  | 8.66859400  | 1.18506400  | -2.38322400 |
| H  | 5.07896700  | 3.57657800  | -2.16592600 |
| H  | 7.48479800  | 3.35380600  | -2.72742600 |
| H  | 3.14309600  | -1.83703000 | 2.10925800  |
| H  | 2.04268900  | -2.08672800 | -0.69382500 |
| H  | -4.64366200 | -0.95259300 | 1.84646900  |
| H  | -2.42894600 | 1.09089200  | 2.09874900  |
| C  | -6.18821100 | -1.43807700 | -2.27914500 |
| H  | -6.30469000 | -0.59115100 | -2.96353900 |
| H  | -7.16609400 | -1.72916500 | -1.89352900 |
| H  | -5.73864500 | -2.25740000 | -2.84509000 |
| C  | -5.27794700 | -1.01468200 | -1.13228600 |
| O  | -4.03738700 | -0.91533900 | -1.52381900 |
| O  | -5.73053800 | -0.78316500 | -0.01024300 |
| C  | 5.75666900  | 1.66129200  | 2.74180100  |
| H  | 6.29398200  | 1.13647600  | 3.53266900  |
| H  | 5.23536400  | 2.53346700  | 3.14304500  |
| H  | 6.47017000  | 2.02028000  | 1.99281600  |
| C  | 4.77484100  | 0.71292400  | 2.06326000  |
| O  | 3.93952400  | 1.37284900  | 1.30480600  |
| O  | 4.83846300  | -0.50356700 | 2.23314600  |

**IV-t (PO-Co<sup>III</sup>-OAc + H<sub>2</sub>O-Co<sup>III</sup>-OAc)**

PO-Co<sup>III</sup>-OAc + H<sub>2</sub>O-Co<sup>III</sup>-OAc = PG + 2Co<sup>III</sup>(salen)-OAc

Charge: 0

Spin Multiplicity: 1

Sum of electronic and thermal Free Energies (a.u.): -3084.744917

Thermal correction to Gibbs Free Energy (a.u.): 0.870435

No imaginary frequency

Calculation of single point energy based on the optimized structure, Ep = -5562.1438352 a.u.

|    |             |             |             |
|----|-------------|-------------|-------------|
| C  | -0.33271400 | -2.31695700 | -0.58768800 |
| C  | 0.39825100  | -2.24588400 | 0.75960000  |
| O  | -1.04353900 | -1.08172800 | -0.86097100 |
| H  | 0.41820800  | -2.38594600 | -1.37448100 |
| H  | 1.18856400  | -2.99797500 | 0.77540300  |
| H  | -0.30060500 | -2.40010900 | 1.58191100  |
| C  | -1.28334200 | -3.49808400 | -0.66383500 |
| H  | -1.77359700 | -3.52511300 | -1.64102000 |
| H  | -0.71871600 | -4.42881300 | -0.54533900 |
| H  | -2.04346300 | -3.44882600 | 0.11544100  |
| O  | 1.03700700  | -0.97298600 | 0.98158600  |
| H  | -0.33905600 | -0.41304400 | -1.09831700 |
| H  | 0.32446200  | -0.28154600 | 1.11277000  |
| C  | 0.18068600  | 3.38208400  | -3.19641600 |
| C  | 0.72642400  | 4.40914400  | -2.40874600 |
| C  | 0.32459900  | 2.05244300  | -2.83436400 |
| H  | -0.35319800 | 3.62885000  | -4.11049400 |
| C  | 1.41496600  | 4.06879900  | -1.25771600 |
| H  | 0.61372800  | 5.44804400  | -2.69879800 |
| C  | 1.01916900  | 1.68144900  | -1.66148100 |
| H  | -0.08129000 | 1.25466900  | -3.44517900 |
| C  | 1.58029400  | 2.72487700  | -0.86468200 |
| H  | 1.83372300  | 4.84529400  | -0.62397000 |
| O  | 1.08221200  | 0.40901000  | -1.33978400 |
| C  | 2.28568400  | 2.46625100  | 0.36111500  |
| Co | 2.49159900  | -0.29480200 | -0.23175100 |
| N  | 2.61477800  | 1.30510600  | 0.81206100  |
| H  | 2.57843600  | 3.34729200  | 0.93495100  |
| N  | 3.77501400  | -0.99576600 | 0.96909600  |
| C  | 3.52124600  | 1.17949900  | 1.97051600  |
| C  | 4.66629500  | -1.87173800 | 0.65832800  |
| C  | 3.68478700  | -0.31900500 | 2.26138800  |
| C  | 3.11539200  | 1.90819400  | 3.25142900  |
| H  | 5.44905000  | -2.10258700 | 1.38123500  |
| C  | 4.70018400  | -2.58266700 | -0.58704200 |
| C  | 4.82208800  | -0.53696800 | 3.25623300  |
| C  | 4.22457100  | 1.71673400  | 4.29846700  |
| H  | 2.17074600  | 1.49745500  | 3.62556000  |
| H  | 2.95067000  | 2.97417000  | 3.06509600  |
| C  | 5.82996400  | -3.37213700 | -0.89295900 |
| C  | 3.57542200  | -2.56386000 | -1.47379100 |
| C  | 4.51429900  | 0.23009500  | 4.55417700  |
| H  | 4.94275400  | -1.60291800 | 3.47935900  |
| H  | 5.76150600  | -0.18111300 | 2.81532600  |
| H  | 3.94509900  | 2.21006900  | 5.23556000  |
| H  | 5.13891300  | 2.20835400  | 3.94142700  |
| C  | 5.88955600  | -4.12449800 | -2.05009900 |
| H  | 6.66526400  | -3.37138600 | -0.19637000 |
| C  | 3.65742200  | -3.36016900 | -2.64456200 |
| O  | 2.47664900  | -1.90236900 | -1.23489100 |
| H  | 3.64013700  | -0.22770100 | 5.03610100  |
| H  | 5.34952000  | 0.12334600  | 5.25433400  |
| C  | 4.78393200  | -4.11284800 | -2.92241700 |
| H  | 6.76794600  | -4.71714100 | -2.28130200 |
| H  | 2.80703200  | -3.34474100 | -3.31811300 |
| H  | 4.81626700  | -4.70239100 | -3.83493700 |
| C  | -0.14737200 | 3.98128400  | 2.42881700  |
| C  | -0.69675900 | 4.82928200  | 1.45320600  |
| C  | -0.27878900 | 2.60521100  | 2.33315800  |
| H  | 0.37920300  | 4.40686600  | 3.27913600  |
| C  | -1.38414700 | 4.26427300  | 0.39314100  |
| H  | -0.59229200 | 5.90575700  | 1.53349600  |
| C  | -0.96073500 | 2.00565900  | 1.25231700  |
| H  | 0.12809500  | 1.94550900  | 3.08942800  |
| C  | -1.53998800 | 2.86846300  | 0.27303800  |
| H  | -1.81396000 | 4.89820200  | -0.37719900 |



|    |             |             |             |
|----|-------------|-------------|-------------|
| O  | -1.00503100 | 0.69457300  | 1.17714700  |
| C  | -2.27092300 | 2.36909400  | -0.85999700 |
| Co | -2.44640900 | -0.20987300 | 0.29275100  |
| N  | -2.61865800 | 1.14314800  | -1.04821200 |
| H  | -2.57469700 | 3.11447100  | -1.59733600 |
| N  | -3.78068800 | -1.13057800 | -0.67874300 |
| C  | -3.55525800 | 0.78309100  | -2.12941500 |
| C  | -4.64182900 | -1.92936900 | -0.15273000 |
| C  | -3.74363700 | -0.74048700 | -2.08584400 |
| C  | -3.17093600 | 1.20792400  | -3.54649200 |
| H  | -5.45425900 | -2.30840700 | -0.77347700 |
| C  | -4.60252300 | -2.37372900 | 1.21175500  |
| C  | -4.91779200 | -1.14577500 | -2.97233500 |
| C  | -4.30959200 | 0.81195500  | -4.50128900 |
| H  | -2.23837100 | 0.71141000  | -3.83960400 |
| H  | -2.99081600 | 2.28638200  | -3.60069800 |
| C  | -5.70453200 | -3.09456200 | 1.72233300  |
| C  | -3.44120100 | -2.16659700 | 2.02706800  |
| C  | -4.63660100 | -0.68702600 | -4.41457700 |
| H  | -5.06087400 | -2.23201400 | -2.95472600 |
| H  | -5.83717500 | -0.68311100 | -2.59288500 |
| H  | -4.04618600 | 1.07749000  | -5.53071500 |
| H  | -5.20469400 | 1.39289300  | -4.24341000 |
| C  | -5.70294300 | -3.59857100 | 3.00829700  |
| H  | -6.56843300 | -3.24144800 | 1.07806100  |
| C  | -3.46134800 | -2.71238200 | 3.33624100  |
| O  | -2.36064600 | -1.56212500 | 1.61436600  |
| H  | -3.78726100 | -1.26203900 | -4.80706700 |
| H  | -5.49494300 | -0.92208500 | -5.05269300 |
| C  | -4.56181600 | -3.40250800 | 3.81017700  |
| H  | -6.56059800 | -4.13987800 | 3.39254300  |
| H  | -2.58288400 | -2.55541800 | 3.95320900  |
| H  | -4.54513100 | -3.79681400 | 4.82284700  |
| H  | -4.51212200 | 1.23074300  | -1.84581700 |
| H  | -2.82610800 | -1.19400700 | -2.48253600 |
| H  | 4.49194000  | 1.54176300  | 1.61955900  |
| H  | 2.74581200  | -0.67296600 | 2.70705000  |
| C  | 5.64140600  | 1.03258500  | -2.61969800 |
| H  | 5.87559500  | 0.05955200  | -3.06374800 |
| H  | 6.56444400  | 1.59023600  | -2.45658400 |
| H  | 4.99031000  | 1.56337800  | -3.31852900 |
| C  | 4.92605100  | 0.80414600  | -1.29334700 |
| O  | 3.71778200  | 0.34969800  | -1.48355700 |
| O  | 5.48669800  | 1.01975200  | -0.21841800 |
| C  | -5.49918400 | 1.61718600  | 2.46805900  |
| H  | -6.42961200 | 2.13112600  | 2.22377700  |
| H  | -4.82422600 | 2.28359200  | 3.01092200  |
| H  | -5.71162400 | 0.76380700  | 3.12011800  |
| C  | -4.83216300 | 1.10847300  | 1.19537000  |
| O  | -3.62538300 | 0.67604800  | 1.43876900  |
| O  | -5.42373000 | 1.11480700  | 0.11551200  |

#### IV-m (PO-Co<sup>III</sup>-OAc + H<sub>2</sub>O-Co<sup>III</sup>-OAc)

PO-Co<sup>III</sup>-OAc + H<sub>2</sub>O-Co<sup>III</sup>-OAc = PG + 2Co<sup>III</sup>(salen)-OAc

Charge: 0

Spin Multiplicity: 1

Sum of electronic and thermal Free Energies (a.u.): -3084.644048

Thermal correction to Gibbs Free Energy (a.u.): 0.860419

Imaginary frequencies: -272.35

Calculation of single point energy based on the optimized structure, Et = -5562.0380295 a.u.

|   |            |             |             |
|---|------------|-------------|-------------|
| N | 2.34044400 | -1.31347800 | 0.11832500  |
| N | 3.58994200 | 0.88536300  | 0.66592900  |
| C | 1.77208300 | -2.37109900 | -0.34797700 |
| H | 1.70307800 | -3.24376900 | 0.30208800  |
| C | 3.88579200 | 2.11820200  | 0.90941300  |
| H | 4.37617600 | 2.35175500  | 1.85537400  |
| C | 1.21630300 | -2.52464800 | -1.66229400 |
| C | 0.73339500 | -3.79991900 | -2.03333200 |
| C | 1.11267200 | -1.42863000 | -2.57892500 |

|    |             |             |             |
|----|-------------|-------------|-------------|
| C  | 0.14485300  | -4.02664500 | -3.26233200 |
| H  | 0.84283800  | -4.61655300 | -1.32307000 |
| C  | 0.48380200  | -1.68620000 | -3.82925800 |
| C  | 0.01961600  | -2.94551100 | -4.15817100 |
| H  | -0.21338300 | -5.01359400 | -3.53337000 |
| H  | 0.40624200  | -0.85600200 | -4.52363400 |
| H  | -0.44104600 | -3.10531500 | -5.12955300 |
| C  | 3.63919100  | 3.23475700  | 0.04413700  |
| C  | 3.94016400  | 4.52900100  | 0.52846000  |
| C  | 3.13977000  | 3.06978200  | -1.28969800 |
| C  | 3.75851400  | 5.65660100  | -0.24693700 |
| H  | 4.32281400  | 4.62170000  | 1.54250900  |
| C  | 2.98510200  | 4.25000100  | -2.07334300 |
| C  | 3.28006900  | 5.49952900  | -1.56330700 |
| H  | 3.98957900  | 6.64171700  | 0.14291300  |
| H  | 2.63159800  | 4.12436200  | -3.09188600 |
| H  | 3.14451800  | 6.37551500  | -2.19235000 |
| O  | 1.53001900  | -0.22559800 | -2.33235800 |
| O  | 2.82049100  | 1.93122500  | -1.82145600 |
| H  | 1.98603200  | -0.86844600 | 2.10384300  |
| C  | 2.82329200  | -1.24995100 | 1.50662000  |
| C  | 3.30373200  | -2.58953400 | 2.09630300  |
| C  | 3.94635200  | -0.20946500 | 1.57566100  |
| C  | 4.37185500  | -2.36549600 | 3.18973300  |
| H  | 2.44706100  | -3.12507400 | 2.51724700  |
| H  | 3.73516300  | -3.18685300 | 1.29036900  |
| C  | 4.20513200  | 0.17915200  | 3.03718800  |
| H  | 4.82910500  | -0.68102200 | 1.13597000  |
| C  | 4.12538100  | -1.06357700 | 3.96128500  |
| H  | 4.37851900  | -3.21724600 | 3.87740700  |
| H  | 5.36339500  | -2.33469800 | 2.72429500  |
| H  | 3.46047200  | 0.91834700  | 3.35668100  |
| H  | 5.18983200  | 0.65120100  | 3.12188000  |
| H  | 3.13104300  | -1.11079700 | 4.41549400  |
| H  | 4.84221600  | -0.96193800 | 4.78219000  |
| Co | 2.62809800  | 0.28979100  | -0.86100000 |
| H  | 0.18533900  | 0.54625800  | -0.56883800 |
| O  | -1.19040800 | 0.38945400  | -1.11650300 |
| C  | -1.38594700 | 1.37112100  | -2.11298200 |
| C  | -0.25237700 | 2.29470200  | -1.80249700 |
| H  | -2.35613800 | 1.86938900  | -2.02120900 |
| H  | -1.27636800 | 0.92759000  | -3.11022200 |
| H  | 0.72456500  | 2.06969500  | -2.23499300 |
| C  | -0.42435200 | 3.48811200  | -0.98792700 |
| H  | -1.08832500 | 3.26210900  | -0.13980800 |
| H  | -1.01493000 | 4.18579000  | -1.61164300 |
| H  | 0.51594600  | 3.95482200  | -0.70168600 |
| O  | 0.96643000  | 1.05401400  | -0.14635900 |
| H  | 0.64092000  | 1.10511500  | 0.78355500  |
| N  | -1.88969000 | -1.57765900 | 0.45706500  |
| N  | -3.76398700 | -0.17889900 | -0.64887900 |
| C  | -1.24451600 | -2.20122200 | 1.37413400  |
| H  | -1.13158400 | -3.28272400 | 1.29245400  |
| C  | -4.76497100 | 0.59356100  | -0.90434400 |
| H  | -5.59325200 | 0.18041700  | -1.48525100 |
| C  | -0.66266100 | -1.57659400 | 2.53747300  |
| C  | -0.19862900 | -2.40196100 | 3.58168500  |
| C  | -0.49539900 | -0.15988900 | 2.62361800  |
| C  | 0.39674800  | -1.87192700 | 4.71399200  |
| H  | -0.32861500 | -3.47751500 | 3.48733300  |
| C  | 0.12631100  | 0.35753900  | 3.78561500  |
| C  | 0.55373500  | -0.47802600 | 4.80557800  |
| H  | 0.73556200  | -2.51941000 | 5.51516300  |
| H  | 0.24197400  | 1.43438900  | 3.85151800  |
| H  | 1.01435200  | -0.04588200 | 5.68971600  |
| C  | -4.90184500 | 1.96183600  | -0.49649700 |
| C  | -6.10393300 | 2.63597000  | -0.81226200 |
| C  | -3.84610200 | 2.66187100  | 0.17206200  |
| C  | -6.29677200 | 3.96351500  | -0.48593800 |

|    |             |             |             |
|----|-------------|-------------|-------------|
| H  | -6.88717700 | 2.07988200  | -1.32250900 |
| C  | -4.06949300 | 4.02822600  | 0.48861800  |
| C  | -5.25968700 | 4.65500100  | 0.17002300  |
| H  | -7.22736000 | 4.46479000  | -0.72816200 |
| H  | -3.27527600 | 4.55637600  | 1.00608300  |
| H  | -5.39747100 | 5.69937700  | 0.43728700  |
| O  | -0.81876100 | 0.66675100  | 1.65589500  |
| O  | -2.68978200 | 2.13482700  | 0.45885300  |
| H  | -1.71717800 | -1.94260600 | -1.54017300 |
| C  | -2.41903700 | -2.21962000 | -0.74551000 |
| C  | -2.58575800 | -3.74145700 | -0.70017900 |
| C  | -3.77918600 | -1.58879700 | -1.06759000 |
| C  | -3.52889100 | -4.21165100 | -1.84089600 |
| H  | -1.60866700 | -4.21991700 | -0.79876000 |
| H  | -3.01230300 | -4.02150200 | 0.26851300  |
| C  | -4.09598700 | -1.82284300 | -2.55447900 |
| H  | -4.51659200 | -2.07756200 | -0.42712900 |
| C  | -3.57612600 | -3.21066400 | -3.00606200 |
| H  | -3.20758500 | -5.19218700 | -2.20551200 |
| H  | -4.54144200 | -4.34645100 | -1.44347400 |
| H  | -3.62372900 | -1.03441200 | -3.15189100 |
| H  | -5.17644500 | -1.75079900 | -2.71842400 |
| H  | -2.56880800 | -3.10494200 | -3.41894400 |
| H  | -4.20570100 | -3.59992200 | -3.81256900 |
| Co | -2.31896900 | 0.27459200  | 0.48763100  |
| C  | -4.70005100 | -0.59586100 | 3.80977400  |
| H  | -5.42532200 | -1.37362600 | 4.05156000  |
| H  | -5.16793000 | 0.39071000  | 3.86417700  |
| H  | -3.88555100 | -0.61045500 | 4.54089200  |
| C  | -4.12525800 | -0.82985400 | 2.41664000  |
| O  | -3.35608500 | 0.15617600  | 2.04861200  |
| O  | -4.38320900 | -1.85532300 | 1.78374300  |
| C  | 5.82544100  | -1.62011800 | -2.74616400 |
| H  | 6.28183200  | -0.69374500 | -3.10363200 |
| H  | 5.22637200  | -2.02630700 | -3.56760500 |
| H  | 6.59372600  | -2.34129500 | -2.46451300 |
| C  | 4.91127400  | -1.33917700 | -1.55756500 |
| O  | 4.13019900  | -0.32443700 | -1.79156500 |
| O  | 4.96146100  | -2.03748700 | -0.54149300 |

**IV-m (PO-Co<sup>III</sup>-OAc + H<sub>2</sub>O-Co<sup>III</sup>-OAc)**

PO-Co<sup>III</sup>-OAc + H<sub>2</sub>O-Co<sup>III</sup>-OAc = PG + 2Co<sup>III</sup>(salen)-OAc

Charge: 0

Spin Multiplicity: 1

Sum of electronic and thermal Free Energies (a.u.): -3084.678380

Thermal correction to Gibbs Free Energy (a.u.): 0.864548

No imaginary frequency

Calculation of single point energy based on the optimized structure, Er = -5562.0760329 a.u.

|   |            |             |             |
|---|------------|-------------|-------------|
| N | 2.78699500 | -0.82184300 | 0.67058500  |
| N | 3.28883800 | 1.69614900  | 0.32358500  |
| C | 2.66771900 | -2.10316500 | 0.62661400  |
| H | 2.84168700 | -2.66865400 | 1.54255900  |
| C | 3.14108900 | 2.95894600  | 0.09256500  |
| H | 3.43239900 | 3.66160100  | 0.87432700  |
| C | 2.33011300 | -2.87948800 | -0.53605800 |
| C | 2.36903100 | -4.28842500 | -0.43290100 |
| C | 1.91015400 | -2.26712400 | -1.76105200 |
| C | 2.02544800 | -5.10451400 | -1.49516400 |
| H | 2.68486800 | -4.72742900 | 0.51086800  |
| C | 1.55977600 | -3.13037100 | -2.83539300 |
| C | 1.62200300 | -4.50572700 | -2.70486100 |
| H | 2.06974900 | -6.18387800 | -1.40102200 |
| H | 1.25525500 | -2.66183700 | -3.76535200 |
| H | 1.35609100 | -5.13305800 | -3.55154800 |
| C | 2.61963400 | 3.54321400  | -1.10601100 |
| C | 2.40522700 | 4.94141000  | -1.12686000 |
| C | 2.33667200 | 2.75651100  | -2.27259600 |
| C | 1.91473100 | 5.58463100  | -2.24479700 |
| H | 2.63182300 | 5.50948900  | -0.22708200 |
| C | 1.85887900 | 3.45522900  | -3.42073800 |

|    |             |             |             |
|----|-------------|-------------|-------------|
| C  | 1.65009200  | 4.81976000  | -3.40030600 |
| H  | 1.74820700  | 6.65620500  | -2.24138100 |
| H  | 1.66661600  | 2.86530000  | -4.31121500 |
| H  | 1.27692100  | 5.31302400  | -4.29435500 |
| O  | 1.79138400  | -0.98346000 | -1.92748800 |
| O  | 2.48648500  | 1.47453500  | -2.34865700 |
| H  | 2.12713800  | 0.17538900  | 2.34740000  |
| C  | 3.09544400  | -0.11414600 | 1.92065500  |
| C  | 3.89557600  | -0.92320100 | 2.95656000  |
| C  | 3.84776700  | 1.17882900  | 1.57623900  |
| C  | 4.67836700  | 0.01263400  | 3.90619100  |
| H  | 3.20993500  | -1.55108300 | 3.53346200  |
| H  | 4.59910500  | -1.56520500 | 2.42192300  |
| C  | 3.80338300  | 2.12958000  | 2.78152400  |
| H  | 4.87466900  | 0.88462100  | 1.34573200  |
| C  | 3.94938200  | 1.34595900  | 4.11088100  |
| H  | 4.83704000  | -0.48547000 | 4.86806100  |
| H  | 5.67319300  | 0.20278700  | 3.48796300  |
| H  | 2.85090700  | 2.67314800  | 2.78474600  |
| H  | 4.60187200  | 2.87382700  | 2.69127200  |
| H  | 2.95442600  | 1.14262500  | 4.52069900  |
| H  | 4.47243600  | 1.96164100  | 4.84941700  |
| Co | 2.66245500  | 0.32942500  | -0.83837000 |
| H  | 0.33530600  | 0.27204600  | -1.04797900 |
| O  | -1.66311700 | 0.77616800  | -1.48358100 |
| C  | -2.45901100 | 1.44031900  | -2.49970900 |
| C  | -1.21909600 | 2.07967700  | -2.04256000 |
| H  | -3.40639600 | 1.81771300  | -2.13012800 |
| H  | -2.48703100 | 0.90117400  | -3.44320700 |
| H  | -0.33068700 | 1.92462000  | -2.64857100 |
| C  | -1.18713600 | 3.28094500  | -1.14814100 |
| H  | -2.07150800 | 3.32584500  | -0.51346700 |
| H  | -1.12114500 | 4.17285000  | -1.78031300 |
| H  | -0.29089200 | 3.25084000  | -0.52780500 |
| O  | 0.81337600  | 0.87097700  | -0.45408000 |
| H  | 0.23338900  | 0.98716300  | 0.34464800  |
| N  | -1.42305000 | -1.38909900 | 0.29416100  |
| N  | -3.72303000 | -0.78953400 | -0.71795900 |
| C  | -0.64586900 | -1.76246200 | 1.24695700  |
| H  | -0.19226600 | -2.75133400 | 1.19996100  |
| C  | -4.96808300 | -0.47096200 | -0.85656700 |
| H  | -5.62363200 | -1.18508100 | -1.36145000 |
| C  | -0.34830800 | -0.95030100 | 2.40279500  |
| C  | 0.24044100  | -1.55441500 | 3.52915500  |
| C  | -0.61377100 | 0.45189500  | 2.40255900  |
| C  | 0.54714000  | -0.81368800 | 4.66041900  |
| H  | 0.43956500  | -2.62289400 | 3.50305500  |
| C  | -0.27261600 | 1.19082000  | 3.55320800  |
| C  | 0.28559600  | 0.56609800  | 4.66103000  |
| H  | 0.98493400  | -1.29116500 | 5.53010800  |
| H  | -0.47711100 | 2.25581500  | 3.54480500  |
| H  | 0.52043400  | 1.15625200  | 5.54234100  |
| C  | -5.57829900 | 0.74171500  | -0.40528300 |
| C  | -6.97500100 | 0.89447900  | -0.57980300 |
| C  | -4.81022300 | 1.80673600  | 0.17200200  |
| C  | -7.62720000 | 2.04863000  | -0.20041100 |
| H  | -7.53187200 | 0.07125700  | -1.02146300 |
| C  | -5.50847200 | 2.98684900  | 0.54283300  |
| C  | -6.87321400 | 3.09889700  | 0.36286200  |
| H  | -8.69871400 | 2.14940100  | -0.33305200 |
| H  | -4.92602500 | 3.79043800  | 0.98058500  |
| H  | -7.37468000 | 4.01394700  | 0.66637900  |
| O  | -1.08444700 | 1.08133900  | 1.33583100  |
| O  | -3.51811700 | 1.77425200  | 0.32960300  |
| H  | -1.19266700 | -1.73252800 | -1.70382300 |
| C  | -1.72853700 | -2.20954700 | -0.87391500 |
| C  | -1.35264300 | -3.69040000 | -0.80573300 |
| C  | -3.23527600 | -2.10993600 | -1.14974800 |
| C  | -2.04707300 | -4.46525300 | -1.95944700 |

|    |             |             |             |
|----|-------------|-------------|-------------|
| H  | -0.27159600 | -3.80850500 | -0.86878000 |
| H  | -1.68527100 | -4.08904900 | 0.15836600  |
| C  | -3.48254300 | -2.45389100 | -2.63010100 |
| H  | -3.72319700 | -2.83527400 | -0.49537000 |
| C  | -2.48030400 | -3.53758000 | -3.10650500 |
| H  | -1.36817700 | -5.23362700 | -2.34008600 |
| H  | -2.92902200 | -4.98896100 | -1.57304000 |
| H  | -3.37255200 | -1.54817900 | -3.23742500 |
| H  | -4.51145200 | -2.80545400 | -2.76061900 |
| H  | -1.58849300 | -3.05718400 | -3.52411300 |
| H  | -2.92400000 | -4.12126900 | -3.91896900 |
| Co | -2.49017100 | 0.19564700  | 0.33171300  |
| C  | -4.10746300 | -1.36739800 | 3.82000000  |
| H  | -4.58536300 | -2.30747200 | 4.09761800  |
| H  | -4.78691800 | -0.52779100 | 3.98419300  |
| H  | -3.22573700 | -1.20450100 | 4.44855700  |
| C  | -3.66439100 | -1.42036500 | 2.36357600  |
| O  | -3.29113400 | -0.23744400 | 1.94687900  |
| O  | -3.65156700 | -2.47378100 | 1.73029600  |
| C  | 6.38174400  | -1.18405700 | -1.98322700 |
| H  | 6.55837400  | -0.41214000 | -2.73634000 |
| H  | 5.97909200  | -2.05978400 | -2.50248500 |
| H  | 7.31410800  | -1.45213200 | -1.48466900 |
| C  | 5.36037400  | -0.70125100 | -0.95792200 |
| O  | 4.31704300  | -0.18468200 | -1.53844500 |
| O  | 5.56752400  | -0.83306800 | 0.25168100  |

**IV-m (PO-Co<sup>III</sup>-OAc + H<sub>2</sub>O-Co<sup>III</sup>-OAc)**

PO-Co<sup>III</sup>-OAc + H<sub>2</sub>O-Co<sup>III</sup>-OAc = PG + 2Co<sup>III</sup>(salen)-OAc

Charge: 0

Spin Multiplicity: 1

Sum of electronic and thermal Free Energies (a.u.): -3084.733345

Thermal correction to Gibbs Free Energy (a.u.): 0.868561

No imaginary frequency

Calculation of single point energy based on the optimized structure, E<sub>p</sub> = -5562.1285283 a.u.

|   |             |             |             |
|---|-------------|-------------|-------------|
| N | 2.32605000  | -1.24203500 | 0.69533800  |
| N | 3.77870900  | 0.90108900  | 0.63418700  |
| C | 1.88806300  | -2.40235500 | 0.36450700  |
| H | 1.96808600  | -3.22269800 | 1.07671400  |
| C | 4.54940500  | 1.89150000  | 0.33183800  |
| H | 5.38655500  | 2.10875400  | 0.99972800  |
| C | 1.31113200  | -2.70970000 | -0.92454000 |
| C | 1.15770600  | -4.06020100 | -1.28758600 |
| C | 0.86713000  | -1.68188200 | -1.80822000 |
| C | 0.62340100  | -4.42051500 | -2.51559600 |
| H | 1.47894900  | -4.82491300 | -0.58512500 |
| C | 0.34679500  | -2.06870300 | -3.06120100 |
| C | 0.23216200  | -3.40837600 | -3.40655600 |
| H | 0.52616300  | -5.46514800 | -2.79036000 |
| H | 0.05392900  | -1.28155200 | -3.74778400 |
| H | -0.16342700 | -3.67422400 | -4.38308000 |
| C | 4.41644700  | 2.74629400  | -0.80916100 |
| C | 5.39660500  | 3.74660400  | -1.01221000 |
| C | 3.30932200  | 2.63837900  | -1.71301600 |
| C | 5.32154400  | 4.62899500  | -2.06986100 |
| H | 6.22406400  | 3.80635000  | -0.30870600 |
| C | 3.25377900  | 3.56771500  | -2.78718900 |
| C | 4.23120100  | 4.52831100  | -2.95791900 |
| H | 6.08365500  | 5.38658200  | -2.21577600 |
| H | 2.41613100  | 3.48372100  | -3.47157700 |
| H | 4.15801400  | 5.21672100  | -3.79574300 |
| O | 0.89029800  | -0.40561500 | -1.48021700 |
| O | 2.34120600  | 1.77953200  | -1.58825200 |
| H | 2.10764900  | -0.39944100 | 2.54107700  |
| C | 2.90150500  | -0.92909600 | 2.00088300  |
| C | 3.39348800  | -2.10976700 | 2.84349100  |
| C | 4.06539400  | 0.05039200  | 1.79785800  |
| C | 4.33468200  | -1.60430400 | 3.96979800  |
| H | 2.53696700  | -2.64037700 | 3.26682500  |
| H | 3.93489500  | -2.80298900 | 2.19203900  |

|    |             |             |             |
|----|-------------|-------------|-------------|
| C  | 4.30872900  | 0.80349700  | 3.11777500  |
| H  | 4.93598500  | -0.54794000 | 1.52072400  |
| C  | 4.06522800  | -0.13408800 | 4.32836000  |
| H  | 4.22570200  | -2.23532800 | 4.85728500  |
| H  | 5.37723600  | -1.70443000 | 3.64713000  |
| H  | 3.63749300  | 1.66806700  | 3.16806900  |
| H  | 5.33436100  | 1.18626000  | 3.14174700  |
| H  | 3.02761200  | -0.03391300 | 4.66837900  |
| H  | 4.69309100  | 0.17315900  | 5.17037100  |
| Co | 2.37207500  | 0.26755800  | -0.45971300 |
| H  | -0.37007700 | 0.50272300  | -1.09866000 |
| O  | -1.08303500 | 1.14142700  | -0.79513700 |
| C  | -0.48794400 | 2.43415400  | -0.58757100 |
| C  | 0.56399600  | 2.47664200  | 0.55609300  |
| H  | -1.30392500 | 3.12777500  | -0.38915800 |
| H  | 0.00753300  | 2.69437700  | -1.52470700 |
| H  | 1.41003600  | 3.05702100  | 0.18780100  |
| C  | 0.09683200  | 3.05896100  | 1.88358600  |
| H  | -0.67402200 | 2.43551400  | 2.33472700  |
| H  | -0.32348600 | 4.05791500  | 1.72600400  |
| H  | 0.95226900  | 3.14775600  | 2.56068900  |
| O  | 1.08976600  | 1.15598100  | 0.79665900  |
| H  | 0.32865700  | 0.57368500  | 1.10591800  |
| N  | -2.23154400 | -1.34851500 | -0.55461500 |
| N  | -3.78661100 | 0.70620900  | -0.84750300 |
| C  | -1.75041500 | -2.43538400 | -0.06791000 |
| H  | -1.76609500 | -3.33863400 | -0.67616500 |
| C  | -4.58020900 | 1.72222800  | -0.77028600 |
| H  | -5.35239500 | 1.82306500  | -1.53623900 |
| C  | -1.19327100 | -2.56087300 | 1.25886300  |
| C  | -0.93080900 | -3.85112000 | 1.75674700  |
| C  | -0.84561200 | -1.41807300 | 2.03565700  |
| C  | -0.36461500 | -4.04062900 | 3.00785300  |
| H  | -1.18314600 | -4.70623500 | 1.13513700  |
| C  | -0.27658000 | -1.63116000 | 3.30979500  |
| C  | -0.04608200 | -2.91460900 | 3.78474400  |
| H  | -0.18150500 | -5.04073500 | 3.38539400  |
| H  | -0.04040700 | -0.75595300 | 3.90583900  |
| H  | 0.38205400  | -3.04711400 | 4.77465000  |
| C  | -4.55716600 | 2.74167400  | 0.23235400  |
| C  | -5.53808900 | 3.76019400  | 0.17837700  |
| C  | -3.56482000 | 2.75886900  | 1.26381600  |
| C  | -5.57020100 | 4.78128400  | 1.10506600  |
| H  | -6.27816200 | 3.72061100  | -0.61782300 |
| C  | -3.62215600 | 3.82390300  | 2.20500000  |
| C  | -4.59511900 | 4.80043100  | 2.12355800  |
| H  | -6.32998000 | 5.55341700  | 1.05440300  |
| H  | -2.87549100 | 3.83441400  | 2.99126800  |
| H  | -4.60972900 | 5.59690400  | 2.86293800  |
| O  | -0.98296800 | -0.18392400 | 1.59203900  |
| O  | -2.60669700 | 1.88901000  | 1.37077800  |
| H  | -1.97938600 | -0.76652300 | -2.49654700 |
| C  | -2.77125200 | -1.24905300 | -1.90978900 |
| C  | -3.18655700 | -2.56128600 | -2.58433700 |
| C  | -3.98440900 | -0.31281300 | -1.88775800 |
| C  | -4.09703100 | -2.27050800 | -3.80771600 |
| H  | -2.29773600 | -3.11573800 | -2.89245400 |
| H  | -3.73106700 | -3.16587300 | -1.85272000 |
| C  | -4.21865800 | 0.22852400  | -3.30969100 |
| H  | -4.83321300 | -0.91313600 | -1.55373800 |
| C  | -3.87739600 | -0.85504400 | -4.36359700 |
| H  | -3.91827300 | -3.01508000 | -4.58964900 |
| H  | -5.14798500 | -2.37697300 | -3.51573900 |
| H  | -3.59817200 | 1.11809900  | -3.46637800 |
| H  | -5.26337400 | 0.53721500  | -3.42056700 |
| H  | -2.83078800 | -0.75100400 | -4.67357200 |
| H  | -4.47915000 | -0.70114700 | -5.26463600 |
| Co | -2.43808500 | 0.27788600  | 0.41461000  |
| C  | -5.14841000 | -1.82795100 | 2.78035400  |

|   |             |             |             |
|---|-------------|-------------|-------------|
| H | -5.97570900 | -2.51272300 | 2.59075700  |
| H | -5.49800300 | -0.95186500 | 3.33263600  |
| H | -4.39335100 | -2.32334000 | 3.39893200  |
| C | -4.51137200 | -1.40141000 | 1.46237700  |
| O | -3.61241800 | -0.47536500 | 1.65311100  |
| O | -4.83777200 | -1.92367400 | 0.39583200  |
| C | 5.07178100  | -1.92278900 | -2.75181000 |
| H | 5.31754700  | -1.10431300 | -3.43329200 |
| H | 4.31996000  | -2.54542200 | -3.24729100 |
| H | 5.95946100  | -2.51891600 | -2.53739900 |
| C | 4.48509800  | -1.37393100 | -1.45624300 |
| O | 3.51382600  | -0.53620400 | -1.69718800 |
| O | 4.90661000  | -1.73719600 | -0.35766200 |

### II-t (PO + H<sub>2</sub>O-Co<sup>III</sup>-OTs)

PO + H<sub>2</sub>O-Co<sup>III</sup>-OTs = PG + Co<sup>III</sup>(salen)-OTs

Charge: 0

Spin Multiplicity: 1

Sum of electronic and thermal Free Energies (a.u.): -2343.268435

Thermal correction to Gibbs Free Energy (a.u.): 0.540748

Imaginary frequencies: -481.36

Calculation of single point energy based on the optimized structure, Et = -3582.3351448 a.u.

|    |             |             |             |
|----|-------------|-------------|-------------|
| C  | 3.91792600  | -2.41233800 | -1.77618900 |
| C  | 2.64826900  | -2.26296600 | -2.49002700 |
| O  | 4.31160300  | -1.11951300 | -2.27478800 |
| H  | 3.79649200  | -2.41682000 | -0.69315900 |
| H  | 1.68124500  | -2.13210200 | -2.01041300 |
| H  | 2.70589000  | -2.28798700 | -3.57498100 |
| C  | 4.88804600  | -3.47008100 | -2.26149000 |
| H  | 5.87083300  | -3.26854800 | -1.82695000 |
| H  | 4.56295900  | -4.46470800 | -1.94432300 |
| H  | 4.97817300  | -3.44874300 | -3.35095000 |
| O  | 2.22538900  | 0.12608300  | -1.86003000 |
| H  | 3.59415100  | -0.44190400 | -1.97190600 |
| H  | 1.77080700  | 0.30576600  | -2.69402800 |
| C  | 3.51068700  | -2.93446000 | 2.98827300  |
| C  | 3.83903800  | -1.79758200 | 3.75008200  |
| C  | 2.80581700  | -2.82240700 | 1.80405100  |
| H  | 3.80542800  | -3.91975600 | 3.33988700  |
| C  | 3.44486200  | -0.55662600 | 3.28959700  |
| H  | 4.38420400  | -1.89568300 | 4.68226000  |
| C  | 2.38216400  | -1.55870900 | 1.30896000  |
| H  | 2.52659000  | -3.69976000 | 1.22896500  |
| C  | 2.72633900  | -0.40382100 | 2.08269100  |
| H  | 3.68280700  | 0.33690900  | 3.86178000  |
| O  | 1.74842800  | -1.52433300 | 0.17369500  |
| C  | 2.38957700  | 0.92517400  | 1.66788300  |
| Co | 0.86188100  | -0.00589000 | -0.53721600 |
| N  | 1.74123400  | 1.24982700  | 0.60014200  |
| H  | 2.71885600  | 1.72615300  | 2.33283300  |
| N  | -0.01526700 | 1.49895000  | -1.28481300 |
| C  | 1.33911600  | 2.64461900  | 0.34560600  |
| C  | -1.24010700 | 1.47200200  | -1.68475200 |
| C  | 0.78288800  | 2.70598300  | -1.08702900 |
| C  | 2.42353100  | 3.70907800  | 0.51956800  |
| H  | -1.74728600 | 2.41409200  | -1.89129900 |
| C  | -1.99564100 | 0.26682000  | -1.88626900 |
| C  | 0.10660400  | 4.05138900  | -1.33109100 |
| C  | 1.81365600  | 5.09530100  | 0.25076400  |
| H  | 3.24921400  | 3.50687700  | -0.17546000 |
| H  | 2.83941200  | 3.68457900  | 1.53167000  |
| C  | -3.38530900 | 0.36636200  | -2.10385100 |
| C  | -1.35655400 | -1.01451700 | -1.91462200 |
| C  | 1.13723800  | 5.17462800  | -1.12579400 |
| H  | -0.29977500 | 4.10094600  | -2.34789000 |
| H  | -0.73004600 | 4.16426300  | -0.63138000 |
| H  | 2.58729300  | 5.86624900  | 0.33335500  |
| H  | 1.07031100  | 5.30857600  | 1.02967300  |
| C  | -4.15719900 | -0.75286000 | -2.35194100 |

|   |             |             |             |
|---|-------------|-------------|-------------|
| H | -3.84727500 | 1.34893000  | -2.05246200 |
| C | -2.16403600 | -2.13851000 | -2.21078800 |
| O | -0.07149400 | -1.17897800 | -1.72203600 |
| H | 1.90353300  | 5.09975900  | -1.90922300 |
| H | 0.65500400  | 6.14976600  | -1.25189900 |
| C | -3.52677600 | -2.00786700 | -2.41559600 |
| H | -5.22895600 | -0.66566700 | -2.49154500 |
| H | -1.68005700 | -3.10932000 | -2.23851100 |
| H | -4.12102000 | -2.89609800 | -2.61360800 |
| H | 1.63996700  | 2.60479100  | -1.76736800 |
| H | 0.50068900  | 2.85252600  | 1.01908900  |
| S | -1.36606900 | 0.59846600  | 1.67884700  |
| O | -0.96361000 | 0.46122700  | 3.08606500  |
| O | -1.48437500 | 1.98876500  | 1.17269800  |
| O | -0.50705900 | -0.31451700 | 0.78244900  |
| C | -2.98091900 | -0.13726200 | 1.43339600  |
| C | -3.10372400 | -1.50937500 | 1.21673000  |
| C | -4.10610700 | 0.68406000  | 1.45424000  |
| C | -4.36706300 | -2.05334800 | 1.00932400  |
| H | -2.21410000 | -2.12611300 | 1.17739700  |
| C | -5.36522400 | 0.12300600  | 1.24918700  |
| H | -3.98408700 | 1.75022500  | 1.60766900  |
| C | -5.51400800 | -1.24869600 | 1.01592600  |
| H | -4.46430600 | -3.11931100 | 0.82095800  |
| H | -6.24461800 | 0.76183500  | 1.25785200  |
| C | -6.86916500 | -1.84487200 | 0.72839100  |
| H | -7.67614700 | -1.20029800 | 1.08788300  |
| H | -7.01312700 | -1.98258000 | -0.35083400 |
| H | -6.98312100 | -2.82732500 | 1.19710400  |

#### II-t (PO + H<sub>2</sub>O-Co<sup>III</sup>-OTs)

PO + H<sub>2</sub>O-Co<sup>III</sup>-OTs = PG + Co<sup>III</sup>(salen)-OTs

Charge: 0

Spin Multiplicity: 1

Sum of electronic and thermal Free Energies (a.u.): -2343.341725

Thermal correction to Gibbs Free Energy (a.u.): 0.542564

No imaginary frequency

Calculation of single point energy based on the optimized structure, Er = -3582.4019147 a.u.

|    |             |             |             |
|----|-------------|-------------|-------------|
| C  | 4.05525700  | -2.88604900 | -1.48937800 |
| C  | 2.78968900  | -3.05134100 | -2.21362700 |
| O  | 3.62787000  | -1.88278700 | -2.44639600 |
| H  | 3.98719500  | -2.54094500 | -0.46142400 |
| H  | 1.85153000  | -2.82784400 | -1.71371800 |
| H  | 2.75496100  | -3.72966600 | -3.06443100 |
| C  | 5.30142900  | -3.63971500 | -1.86445400 |
| H  | 6.19139200  | -3.02527600 | -1.69519000 |
| H  | 5.39329500  | -4.54207100 | -1.25046000 |
| H  | 5.27826300  | -3.93304100 | -2.91752600 |
| O  | 2.22524400  | 0.29151000  | -2.01520500 |
| H  | 2.84636400  | -0.49392500 | -1.97126400 |
| H  | 1.64508700  | 0.05622400  | -2.75911400 |
| C  | 3.37393300  | -2.61160100 | 3.17115600  |
| C  | 3.60405100  | -1.44700000 | 3.92757100  |
| C  | 2.79099400  | -2.54954300 | 1.91868900  |
| H  | 3.64764200  | -3.58015100 | 3.58126900  |
| C  | 3.23313900  | -0.22873100 | 3.39519600  |
| H  | 4.05373500  | -1.50817600 | 4.91234500  |
| C  | 2.40162600  | -1.31035900 | 1.34581100  |
| H  | 2.59126900  | -3.44847500 | 1.34512200  |
| C  | 2.63501900  | -0.12846500 | 2.11844800  |
| H  | 3.38900800  | 0.68522500  | 3.96304400  |
| O  | 1.89382700  | -1.31421700 | 0.14409400  |
| C  | 2.28973400  | 1.17433000  | 1.63950300  |
| Co | 0.88256600  | 0.10832100  | -0.57575700 |
| N  | 1.69439300  | 1.44116200  | 0.52333100  |
| H  | 2.54792900  | 2.00863400  | 2.29507000  |
| N  | -0.07123400 | 1.54804600  | -1.36509600 |
| C  | 1.24530200  | 2.81094000  | 0.21302200  |
| C  | -1.29364200 | 1.44681600  | -1.76062400 |
| C  | 0.67328600  | 2.79584300  | -1.21468500 |



|   |             |             |             |
|---|-------------|-------------|-------------|
| C | 2.29816700  | 3.91422000  | 0.32679600  |
| H | -1.84929800 | 2.35477000  | -1.99424700 |
| C | -1.98062800 | 0.19532200  | -1.91981900 |
| C | -0.06155600 | 4.10288200  | -1.49588000 |
| C | 1.63463100  | 5.26744300  | 0.01799300  |
| H | 3.11726200  | 3.71311000  | -0.37589700 |
| H | 2.73256400  | 3.93900100  | 1.33129100  |
| C | -3.37769500 | 0.20356200  | -2.10956400 |
| C | -1.26281600 | -1.04355400 | -1.92889700 |
| C | 0.92859700  | 5.27145100  | -1.34666700 |
| H | -0.48248600 | 4.10035700  | -2.50782800 |
| H | -0.89286700 | 4.20839400  | -0.78860500 |
| H | 2.38162300  | 6.06752600  | 0.05479500  |
| H | 0.89983900  | 5.48485900  | 0.80392500  |
| C | -4.08177300 | -0.96933600 | -2.30702400 |
| H | -3.89944000 | 1.15647700  | -2.07595000 |
| C | -2.00254900 | -2.22374200 | -2.17233000 |
| O | 0.03755500  | -1.12346400 | -1.76311400 |
| H | 1.68203500  | 5.19899600  | -2.14244800 |
| H | 0.40644000  | 6.22237200  | -1.49594100 |
| C | -3.37540000 | -2.18406600 | -2.34868800 |
| H | -5.15952000 | -0.95358400 | -2.42536900 |
| H | -1.45777900 | -3.16179400 | -2.18717200 |
| H | -3.91684300 | -3.11281800 | -2.50787900 |
| H | 1.52500300  | 2.71242300  | -1.90342800 |
| H | 0.41039100  | 3.02377200  | 0.88878200  |
| S | -1.31725700 | 0.63749700  | 1.63351700  |
| O | -0.85669700 | 0.54619900  | 3.02578200  |
| O | -1.51316900 | 2.00673900  | 1.10068200  |
| O | -0.44537700 | -0.26238800 | 0.72247200  |
| C | -2.89586400 | -0.18641500 | 1.44714500  |
| C | -2.95395600 | -1.57035400 | 1.28415400  |
| C | -4.05834800 | 0.58122700  | 1.45364400  |
| C | -4.19207800 | -2.18105600 | 1.11516700  |
| H | -2.03697400 | -2.14612600 | 1.25577500  |
| C | -5.29127600 | -0.04709700 | 1.28816400  |
| H | -3.98619400 | 1.65707100  | 1.56481800  |
| C | -5.37642400 | -1.43212200 | 1.10803600  |
| H | -4.24013700 | -3.25684100 | 0.96893600  |
| H | -6.20016300 | 0.54889000  | 1.28596600  |
| C | -6.70471200 | -2.10280400 | 0.86292700  |
| H | -7.53702500 | -1.48523800 | 1.21167700  |
| H | -6.85623900 | -2.28608000 | -0.20837900 |
| H | -6.76397700 | -3.07199600 | 1.36775200  |

### II-t (PO + H<sub>2</sub>O-Co<sup>III</sup>-OTs)

PO + H<sub>2</sub>O-Co<sup>III</sup>-OTs = PG + Co<sup>III</sup>(salen)-OTs

Charge: 0

Spin Multiplicity: 1

Sum of electronic and thermal Free Energies (a.u.): -2343.360180

Thermal correction to Gibbs Free Energy (a.u.): 0.547062

No imaginary frequency

Calculation of single point energy based on the optimized structure, Ep = -3582.4282134 a.u.

|   |            |             |             |
|---|------------|-------------|-------------|
| C | 4.27238100 | 0.11135500  | -1.51606700 |
| C | 3.17042700 | -0.14391100 | -2.53093300 |
| O | 4.52397600 | 1.51229300  | -1.39983300 |
| H | 3.94092900 | -0.28882500 | -0.55039800 |
| H | 2.90014900 | -1.19991900 | -2.57251900 |
| H | 3.47180600 | 0.22355600  | -3.51781900 |
| C | 5.56862800 | -0.57029800 | -1.92387900 |
| H | 6.35027800 | -0.34006600 | -1.19583800 |
| H | 5.43828500 | -1.65604400 | -1.96016700 |
| H | 5.90108300 | -0.21638300 | -2.90479700 |
| O | 2.01041600 | 0.63185400  | -2.12098000 |
| H | 3.66148300 | 1.94826500  | -1.42507100 |
| H | 1.29729900 | 0.54765800  | -2.78969400 |
| C | 2.60715800 | -4.81818000 | 0.47110100  |
| C | 3.04838800 | -4.37660300 | 1.73576200  |
| C | 2.03980100 | -3.94586300 | -0.43666400 |
| H | 2.70669700 | -5.86754700 | 0.20658000  |

|    |             |             |             |
|----|-------------|-------------|-------------|
| C  | 2.91395600  | -3.04279500 | 2.05448400  |
| H  | 3.48288700  | -5.07497300 | 2.44232100  |
| C  | 1.87165200  | -2.56967600 | -0.12944100 |
| H  | 1.68633000  | -4.28494700 | -1.40455500 |
| C  | 2.34158900  | -2.11807300 | 1.14730700  |
| H  | 3.24755900  | -2.67427300 | 3.02133300  |
| O  | 1.33434300  | -1.79883600 | -1.03155300 |
| C  | 2.29613300  | -0.74476100 | 1.53032700  |
| Co | 0.71942100  | -0.04988200 | -0.70956400 |
| N  | 1.82701200  | 0.22900800  | 0.81489800  |
| H  | 2.71537000  | -0.50337700 | 2.50905000  |
| N  | 0.17147700  | 1.75225600  | -0.45334300 |
| C  | 1.76006100  | 1.59632500  | 1.36108900  |
| C  | -1.02243400 | 2.16900700  | -0.69703100 |
| C  | 1.20156700  | 2.50438500  | 0.25366100  |
| C  | 3.08288300  | 2.17774900  | 1.86517300  |
| H  | -1.32362500 | 3.15020500  | -0.33050100 |
| C  | -1.99733100 | 1.41286500  | -1.43468000 |
| C  | 0.84308800  | 3.87034700  | 0.82933100  |
| C  | 2.82015800  | 3.58518700  | 2.42856100  |
| H  | 3.80541000  | 2.20525500  | 1.03957400  |
| H  | 3.51184300  | 1.54396000  | 2.64812400  |
| C  | -3.34246500 | 1.83403500  | -1.41744700 |
| C  | -1.61451300 | 0.27392100  | -2.20987800 |
| C  | 2.11934100  | 4.50307100  | 1.41412800  |
| H  | 0.42904900  | 4.52311000  | 0.05258400  |
| H  | 0.07804500  | 3.74564300  | 1.60464700  |
| H  | 3.76232700  | 4.03995800  | 2.75197300  |
| H  | 2.19047400  | 3.49280600  | 3.32299200  |
| C  | -4.31183600 | 1.16368000  | -2.14026500 |
| H  | -3.61063300 | 2.68934800  | -0.80292300 |
| C  | -2.61616400 | -0.37042000 | -2.96779800 |
| O  | -0.37664900 | -0.17431000 | -2.26961200 |
| H  | 2.81107200  | 4.72332600  | 0.58997000  |
| H  | 1.87650700  | 5.46261100  | 1.88235100  |
| C  | -3.93160900 | 0.06285200  | -2.92646300 |
| H  | -5.34808200 | 1.48054200  | -2.09970600 |
| H  | -2.32118100 | -1.23053000 | -3.55915300 |
| H  | -4.68386700 | -0.46942200 | -3.50228200 |
| H  | 2.00506500  | 2.64883400  | -0.48210000 |
| H  | 1.02119100  | 1.58159200  | 2.16847700  |
| S  | -1.29801800 | -0.37140000 | 1.68933200  |
| O  | -0.90833900 | -1.33394800 | 2.72790500  |
| O  | -1.11493400 | 1.06033200  | 2.02271100  |
| O  | -0.66919600 | -0.77680500 | 0.32824900  |
| C  | -3.02996800 | -0.56123600 | 1.27955500  |
| C  | -3.43960700 | -1.55694100 | 0.39266900  |
| C  | -3.95290900 | 0.31211900  | 1.85047100  |
| C  | -4.78857000 | -1.66296500 | 0.07131000  |
| H  | -2.70310300 | -2.20895000 | -0.06085700 |
| C  | -5.30157700 | 0.18817600  | 1.52158300  |
| H  | -3.60781000 | 1.08799400  | 2.52422700  |
| C  | -5.73769500 | -0.79212300 | 0.62335700  |
| H  | -5.10971600 | -2.42486100 | -0.63383500 |
| H  | -6.02453500 | 0.87122300  | 1.95970500  |
| C  | -7.18720800 | -0.88365000 | 0.21772600  |
| H  | -7.83981000 | -0.39341400 | 0.94533600  |
| H  | -7.35095100 | -0.39782400 | -0.75251600 |
| H  | -7.51021200 | -1.92429600 | 0.11614000  |

### II-m (PO + H<sub>2</sub>O-Co<sup>III</sup>-OTs)

PO + H<sub>2</sub>O-Co<sup>III</sup>-OTs = PG + Co<sup>III</sup>(salen)-OTs

Charge: 0

Spin Multiplicity: 1

Sum of electronic and thermal Free Energies (a.u.): -2343.281598

Thermal correction to Gibbs Free Energy (a.u.): 0.542275

Imaginary frequencies: -390.99

Calculation of single point energy based on the optimized structure, Et = -3582.3547345 a.u.

|   |            |             |            |
|---|------------|-------------|------------|
| C | 4.63217700 | -3.01620300 | 2.00521500 |
|---|------------|-------------|------------|

|    |             |             |             |
|----|-------------|-------------|-------------|
| C  | 5.58388000  | -2.00975500 | 1.74957000  |
| C  | 3.29049500  | -2.81514000 | 1.74231500  |
| H  | 4.95488500  | -3.96534100 | 2.42517500  |
| C  | 5.14665500  | -0.80204400 | 1.24280100  |
| C  | 2.81033800  | -1.59092500 | 1.19305300  |
| C  | 3.78396200  | -0.56467300 | 0.95013200  |
| H  | 5.85779600  | 0.00081500  | 1.06135500  |
| O  | 1.54019200  | -1.47697600 | 0.95233600  |
| C  | 3.41121900  | 0.74419800  | 0.48603600  |
| Co | 0.74895200  | -0.08756400 | -0.10106500 |
| N  | 2.24192900  | 1.08128100  | 0.06490200  |
| H  | 4.19532100  | 1.50222800  | 0.51085900  |
| N  | 0.00329800  | 1.24717200  | -1.23476500 |
| C  | 1.86011600  | 2.45223500  | -0.28378400 |
| C  | -1.15170100 | 1.18965800  | -1.79916600 |
| C  | 0.95656600  | 2.33242400  | -1.51923400 |
| C  | 2.98959500  | 3.45337800  | -0.50873100 |
| H  | -1.45261300 | 2.01660400  | -2.44194200 |
| C  | -2.10369600 | 0.12370900  | -1.67945500 |
| C  | 0.34875200  | 3.69117000  | -1.87359500 |
| C  | 2.39236400  | 4.82225600  | -0.86933400 |
| H  | 3.64659400  | 3.10240600  | -1.31721400 |
| H  | 3.60208300  | 3.54778700  | 0.39422000  |
| C  | -3.32202500 | 0.24179400  | -2.38313800 |
| C  | -1.84228700 | -1.04495400 | -0.89805100 |
| C  | 1.46245400  | 4.72781100  | -2.08432200 |
| H  | -0.25026900 | 3.62271900  | -2.78760100 |
| H  | -0.31531000 | 3.98755100  | -1.05519500 |
| H  | 3.19750700  | 5.53971100  | -1.06033100 |
| H  | 1.82637600  | 5.19919500  | -0.00848900 |
| C  | -4.28200100 | -0.75084900 | -2.34707000 |
| H  | -3.49381800 | 1.14487400  | -2.96426200 |
| C  | -2.85153100 | -2.04661600 | -0.87086600 |
| O  | -0.74192000 | -1.25878000 | -0.23848300 |
| H  | 2.05164600  | 4.45259700  | -2.97030000 |
| H  | 1.01767100  | 5.70583400  | -2.29607300 |
| C  | -4.02805700 | -1.90450800 | -1.58282000 |
| H  | -4.77164200 | -2.69613400 | -1.54203800 |
| H  | 1.58288300  | 1.97847900  | -2.35251300 |
| H  | 1.22179900  | 2.80363900  | 0.53364600  |
| O  | 1.50922400  | -0.89185100 | -1.65296100 |
| H  | 1.07326800  | -1.79699200 | -2.72759900 |
| C  | 0.98682200  | -3.43909600 | -1.30077400 |
| C  | 0.06230700  | -3.49128500 | -2.44682300 |
| O  | 0.91274800  | -2.67578600 | -3.25212200 |
| H  | 0.75867500  | -2.79782200 | -0.44785600 |
| H  | -0.92150600 | -3.05858900 | -2.25886100 |
| H  | -0.02137800 | -4.48042100 | -2.90640700 |
| C  | 2.22866400  | -4.21363200 | -1.27817300 |
| H  | 2.06818400  | -4.98574700 | -0.50452000 |
| H  | 2.46804900  | -4.69096300 | -2.22863500 |
| H  | 3.06171700  | -3.61645700 | -0.89426200 |
| H  | -5.21092900 | -0.64508900 | -2.89643300 |
| H  | -2.66888600 | -2.91769300 | -0.25070700 |
| H  | 2.55222400  | -3.57959600 | 1.96363600  |
| H  | 6.63386500  | -2.17455100 | 1.96419000  |
| S  | -0.96178400 | 1.68887600  | 1.93031700  |
| O  | -0.80019000 | 2.06342100  | 3.34067100  |
| O  | -1.05005300 | 2.79623800  | 0.94976300  |
| O  | 0.14328500  | 0.67053800  | 1.57686600  |
| C  | -2.47244400 | 0.74681800  | 1.78435600  |
| C  | -2.55894100 | -0.49446300 | 2.41492500  |
| C  | -3.55510000 | 1.26780600  | 1.08193700  |
| C  | -3.74468200 | -1.21638500 | 2.32924500  |
| H  | -1.69915800 | -0.88851700 | 2.94433100  |
| C  | -4.73650000 | 0.53331300  | 1.00463700  |
| H  | -3.45594500 | 2.23260000  | 0.59863000  |
| C  | -4.84703400 | -0.71725000 | 1.62135300  |
| H  | -3.81725900 | -2.18761500 | 2.81189000  |

|   |             |             |             |
|---|-------------|-------------|-------------|
| H | -5.57917600 | 0.92979600  | 0.44525200  |
| C | -6.10618800 | -1.53264400 | 1.47875400  |
| H | -6.99727800 | -0.89773200 | 1.46809300  |
| H | -6.09551300 | -2.09285900 | 0.53526000  |
| H | -6.21175900 | -2.25677600 | 2.29162900  |
| H | 2.47076800  | -0.86619200 | -1.56672100 |

**II-m (PO + H<sub>2</sub>O-Co<sup>III</sup>-OTs)**

PO + H<sub>2</sub>O-Co<sup>III</sup>-OTs = PG + Co<sup>III</sup>(salen)-OTs

Charge: 0

Spin Multiplicity: 1

Sum of electronic and thermal Free Energies (a.u.): -2343.341750

Thermal correction to Gibbs Free Energy (a.u.): 0.544847

No imaginary frequency

Calculation of single point energy based on the optimized structure, Er = -3582.4083557 a.u.

|    |             |             |             |
|----|-------------|-------------|-------------|
| C  | -4.41923800 | -3.36519600 | -1.65325100 |
| C  | -5.44626800 | -2.41196100 | -1.48641200 |
| C  | -3.10257200 | -3.05533400 | -1.38198400 |
| H  | -4.66678700 | -4.36122600 | -2.01063100 |
| C  | -5.10740400 | -1.14496600 | -1.06364700 |
| C  | -2.72301200 | -1.76757500 | -0.90516900 |
| C  | -3.76773300 | -0.79234900 | -0.76512200 |
| H  | -5.87484100 | -0.38138300 | -0.95798700 |
| O  | -1.47127900 | -1.55468400 | -0.63831900 |
| C  | -3.48938200 | 0.57185000  | -0.42392300 |
| Co | -0.77723600 | -0.01453300 | 0.23661400  |
| N  | -2.34707900 | 1.02901000  | -0.03316500 |
| H  | -4.32064300 | 1.27105900  | -0.52419100 |
| N  | -0.13082700 | 1.47914800  | 1.22818000  |
| C  | -2.05402400 | 2.45230700  | 0.15746000  |
| C  | 1.04173800  | 1.57639300  | 1.75323300  |
| C  | -1.15044100 | 2.52850000  | 1.39571300  |
| C  | -3.24588400 | 3.39855900  | 0.27229800  |
| H  | 1.29306000  | 2.49452100  | 2.28292900  |
| C  | 2.07204900  | 0.58325300  | 1.71484000  |
| C  | -0.63057200 | 3.95375200  | 1.59535300  |
| C  | -2.73794400 | 4.83413500  | 0.47587900  |
| H  | -3.88203000 | 3.09891000  | 1.11712100  |
| H  | -3.85939400 | 3.35185200  | -0.63352500 |
| C  | 3.30977500  | 0.88610400  | 2.32628500  |
| C  | 1.87306400  | -0.69128100 | 1.09929300  |
| C  | -1.80855100 | 4.93540300  | 1.69061100  |
| H  | -0.03354700 | 4.02526000  | 2.51034700  |
| H  | 0.01888000  | 4.19913200  | 0.74851900  |
| H  | -3.58771300 | 5.51562300  | 0.58854900  |
| H  | -2.19452000 | 5.14845400  | -0.42383800 |
| C  | 4.34749600  | -0.02344500 | 2.34936400  |
| H  | 3.43145400  | 1.86566400  | 2.78266700  |
| C  | 2.96118100  | -1.60479400 | 1.12950000  |
| O  | 0.76082700  | -1.07388600 | 0.53901900  |
| H  | -2.38261300 | 4.72549200  | 2.60385700  |
| H  | -1.42660000 | 5.95682800  | 1.78957700  |
| C  | 4.15524000  | -1.27972300 | 1.74357800  |
| H  | 4.96315100  | -2.00662400 | 1.74887900  |
| H  | -1.75909200 | 2.23576200  | 2.26565900  |
| H  | -1.43847100 | 2.75155000  | -0.69773300 |
| O  | -1.54936200 | -0.71003400 | 1.93011200  |
| H  | -1.21823400 | -1.65273500 | 2.07124400  |
| C  | -0.39940900 | -3.93373000 | 1.21589800  |
| C  | 0.37380400  | -3.70306900 | 2.44221400  |
| O  | -0.98430500 | -3.20900400 | 2.34243900  |
| H  | -0.19755900 | -3.27361100 | 0.37584700  |
| H  | 1.13968900  | -2.93389300 | 2.45961000  |
| H  | 0.48855600  | -4.51142600 | 3.16211200  |
| C  | -1.04838500 | -5.25662900 | 0.92012300  |
| H  | -0.41724300 | -5.84104100 | 0.24194800  |
| H  | -1.20719400 | -5.83324000 | 1.83574500  |
| H  | -2.01575500 | -5.10144500 | 0.43360400  |
| H  | 5.29147800  | 0.22276200  | 2.82284000  |
| H  | 2.82336900  | -2.55840100 | 0.63290500  |

|   |             |             |             |
|---|-------------|-------------|-------------|
| H | -2.30964100 | -3.77938300 | -1.53265600 |
| H | -6.47681100 | -2.66721400 | -1.70659300 |
| S | 0.84210000  | 1.60094800  | -1.95725300 |
| O | 0.60221400  | 1.84923800  | -3.38320100 |
| O | 0.93542300  | 2.78300700  | -1.07303800 |
| O | -0.23096900 | 0.58316400  | -1.48471600 |
| C | 2.37501100  | 0.70063500  | -1.80201300 |
| C | 2.44807100  | -0.60120900 | -2.29786600 |
| C | 3.48884800  | 1.31675100  | -1.23891900 |
| C | 3.65571900  | -1.28684900 | -2.22032800 |
| H | 1.56351000  | -1.06704800 | -2.71648200 |
| C | 4.69119800  | 0.61695000  | -1.16889400 |
| H | 3.39870800  | 2.32567600  | -0.85426400 |
| C | 4.79130200  | -0.69153800 | -1.65363400 |
| H | 3.71951100  | -2.30399400 | -2.59801200 |
| H | 5.55966300  | 1.08783900  | -0.71727000 |
| C | 6.07813000  | -1.46354500 | -1.51518800 |
| H | 6.95065600  | -0.80943000 | -1.60304400 |
| H | 6.13255300  | -1.94725400 | -0.53158000 |
| H | 6.16077800  | -2.24841300 | -2.27239000 |
| H | -2.50047900 | -0.80929900 | 1.77846900  |

### II-m (PO + H<sub>2</sub>O-Co<sup>III</sup>-OTs)

PO + H<sub>2</sub>O-Co<sup>III</sup>-OTs = PG + Co<sup>III</sup>(salen)-OTs

Charge: 0

Spin Multiplicity: 1

Sum of electronic and thermal Free Energies (a.u.): -2343.355883

Thermal correction to Gibbs Free Energy (a.u.): 0.548028

No imaginary frequency

Calculation of single point energy based on the optimized structure, Ep = -3582.4307041 a.u.

|    |             |             |             |
|----|-------------|-------------|-------------|
| C  | -4.37146000 | -3.35281200 | -2.10787400 |
| C  | -5.37348100 | -2.36992400 | -1.95192200 |
| C  | -3.04919200 | -3.08188700 | -1.82409500 |
| H  | -4.64525400 | -4.34309500 | -2.46173200 |
| C  | -5.00675700 | -1.11696000 | -1.51364400 |
| C  | -2.63682800 | -1.80209000 | -1.35061300 |
| C  | -3.66069900 | -0.80441200 | -1.19531000 |
| H  | -5.75535100 | -0.33561300 | -1.40324600 |
| O  | -1.38091600 | -1.62224500 | -1.08322700 |
| C  | -3.35403500 | 0.53886700  | -0.79754000 |
| Co | -0.69348300 | -0.17897600 | -0.05549500 |
| N  | -2.21488300 | 0.93472100  | -0.33608200 |
| H  | -4.15846800 | 1.26897100  | -0.89623000 |
| N  | -0.08986800 | 1.20034800  | 1.11419700  |
| C  | -1.88558100 | 2.32870400  | -0.03053000 |
| C  | 1.04620100  | 1.21510100  | 1.72786100  |
| C  | -1.07721900 | 2.28298200  | 1.27445200  |
| C  | -3.04669900 | 3.31412400  | 0.06125000  |
| H  | 1.28799900  | 2.08334500  | 2.33975700  |
| C  | 2.03474700  | 0.18344900  | 1.70006900  |
| C  | -0.52168900 | 3.66796800  | 1.61241200  |
| C  | -2.50183800 | 4.70995100  | 0.40090800  |
| H  | -3.75644900 | 2.98753300  | 0.83462600  |
| H  | -3.59053200 | 3.35178200  | -0.88854000 |
| C  | 3.21725500  | 0.37189000  | 2.45460200  |
| C  | 1.84252000  | -1.02958700 | 0.96653200  |
| C  | -1.66642400 | 4.69019900  | 1.68613500  |
| H  | 0.00379000  | 3.65270600  | 2.57289400  |
| H  | 0.20082000  | 3.94081500  | 0.83645500  |
| H  | -3.33121700 | 5.41841100  | 0.49699900  |
| H  | -1.87890500 | 5.05940600  | -0.43169900 |
| C  | 4.19619700  | -0.59670400 | 2.51344000  |
| H  | 3.33872400  | 1.30726200  | 2.99570600  |
| C  | 2.86468800  | -2.01269500 | 1.05072500  |
| O  | 0.78588500  | -1.30123800 | 0.25715800  |
| H  | -2.31747500 | 4.44556800  | 2.53706200  |
| H  | -1.25509600 | 5.68537500  | 1.88412100  |
| C  | 3.99972100  | -1.80073600 | 1.80651400  |
| H  | 4.75835600  | -2.57749700 | 1.85233900  |
| H  | -1.76749600 | 1.96410000  | 2.07250300  |

|   |             |             |             |
|---|-------------|-------------|-------------|
| H | -1.19542100 | 2.65735800  | -0.81432300 |
| O | -1.70455600 | -1.00542000 | 1.51038400  |
| H | -1.57169200 | -0.70583800 | 3.84703400  |
| C | -1.35574300 | -2.38137500 | 1.92525000  |
| C | -0.56550900 | -2.21563200 | 3.21774800  |
| O | -1.32692300 | -1.56299400 | 4.22199400  |
| H | -0.72261600 | -2.79139800 | 1.13722800  |
| H | 0.36722500  | -1.67904600 | 3.00722500  |
| H | -0.30244100 | -3.20476400 | 3.60502500  |
| C | -2.63805800 | -3.17822800 | 2.09023700  |
| H | -2.39357600 | -4.21211600 | 2.35048100  |
| H | -3.24637500 | -2.76142400 | 2.89792500  |
| H | -3.21118900 | -3.19994200 | 1.15755500  |
| H | 5.09644400  | -0.44128100 | 3.09761300  |
| H | 2.71843600  | -2.92852200 | 0.48972700  |
| H | -2.27571900 | -3.83188700 | -1.94953800 |
| H | -6.40799500 | -2.59625700 | -2.18463200 |
| S | 1.13999500  | 1.53808600  | -1.96777400 |
| O | 1.03004900  | 1.89524800  | -3.38600900 |
| O | 1.19346700  | 2.64825900  | -0.99233800 |
| O | -0.01545500 | 0.53848900  | -1.66848600 |
| C | 2.61691300  | 0.56442700  | -1.74661800 |
| C | 2.68393300  | -0.70467400 | -2.32183700 |
| C | 3.69690600  | 1.09376300  | -1.04588200 |
| C | 3.85146700  | -1.44712600 | -2.18197100 |
| H | 1.82337700  | -1.10485900 | -2.84505900 |
| C | 4.85931300  | 0.33750700  | -0.91547300 |
| H | 3.61117600  | 2.07903400  | -0.60327600 |
| C | 4.95166200  | -0.94112800 | -1.47551100 |
| H | 3.90912500  | -2.44079600 | -2.61807600 |
| H | 5.70006600  | 0.73899000  | -0.35710600 |
| C | 6.18681200  | -1.77954500 | -1.27117700 |
| H | 7.08854700  | -1.16203100 | -1.22316700 |
| H | 6.12111100  | -2.33391600 | -0.32640600 |
| H | 6.31449000  | -2.51155200 | -2.07364500 |
| H | -2.61421100 | -1.02263600 | 1.17571600  |

### III-t (PO-Co<sup>III</sup>-OTs + H<sub>2</sub>O)

PO-Co<sup>III</sup>-OTs + H<sub>2</sub>O = PG + Co<sup>III</sup>(salen)-OTs

Charge: 0

Spin Multiplicity: 1

Sum of electronic and thermal Free Energies (a.u.): -2343.274297

Thermal correction to Gibbs Free Energy (a.u.): 0.542911

Imaginary frequencies: -377.29

Calculation of single point energy based on the optimized structure, Et = -3582.3482958 a.u.

|    |             |             |             |
|----|-------------|-------------|-------------|
| C  | -4.41781900 | -3.64830400 | -1.55838400 |
| C  | -5.39993400 | -2.63715600 | -1.56766600 |
| C  | -3.09861900 | -3.36217900 | -1.26685700 |
| H  | -4.70033900 | -4.67206600 | -1.78919800 |
| C  | -5.01705400 | -1.34214400 | -1.28363700 |
| H  | -6.43189800 | -2.87194300 | -1.80412500 |
| C  | -2.67613300 | -2.03863300 | -0.95554900 |
| H  | -2.33753600 | -4.13539400 | -1.26666400 |
| C  | -3.67822600 | -1.01377000 | -0.96769400 |
| H  | -5.75231100 | -0.54061700 | -1.29908500 |
| O  | -1.42150900 | -1.84864900 | -0.67799300 |
| C  | -3.36142400 | 0.36175400  | -0.72263300 |
| Co | -0.68964900 | -0.25471400 | 0.04421600  |
| N  | -2.21954700 | 0.81236900  | -0.32982500 |
| H  | -4.16397200 | 1.07716400  | -0.90768400 |
| N  | 0.00036800  | 1.30203000  | 0.91407100  |
| C  | -1.88636300 | 2.23799400  | -0.25978300 |
| C  | 1.14430200  | 1.38548100  | 1.50077600  |
| C  | -0.97829000 | 2.40365700  | 0.96458900  |
| C  | -3.04825700 | 3.22748700  | -0.22653300 |
| H  | 1.41351500  | 2.32916500  | 1.97399800  |
| C  | 2.11387900  | 0.33570700  | 1.62054000  |
| C  | -0.40535800 | 3.82095600  | 1.02430500  |
| C  | -2.49496700 | 4.65952600  | -0.15879200 |

|   |             |             |             |
|---|-------------|-------------|-------------|
| H | -3.68831400 | 3.02482200  | 0.64389800  |
| H | -3.66940900 | 3.11941500  | -1.12162400 |
| C | 3.30081500  | 0.60891300  | 2.33771300  |
| C | 1.89772100  | -0.96856800 | 1.07000100  |
| C | -1.54997400 | 4.84546100  | 1.03404400  |
| H | 0.20172000  | 3.95784300  | 1.92507300  |
| H | 0.24300700  | 3.96034200  | 0.15366300  |
| H | -3.32243700 | 5.37495500  | -0.10395600 |
| H | -1.95090400 | 4.87187600  | -1.08741200 |
| C | 4.26329000  | -0.35919000 | 2.54308500  |
| H | 3.44181500  | 1.61178200  | 2.73386000  |
| C | 2.90286700  | -1.94759900 | 1.30335900  |
| O | 0.83543600  | -1.32256500 | 0.41078400  |
| H | -2.12104300 | 4.74176600  | 1.96746100  |
| H | -1.13528900 | 5.85897600  | 1.03254000  |
| C | 4.04339300  | -1.64988000 | 2.02411000  |
| H | 5.16662100  | -0.13419000 | 3.09926600  |
| H | 2.73967300  | -2.93238300 | 0.88012100  |
| H | 4.78549400  | -2.42701200 | 2.18696200  |
| C | -1.33628000 | -2.10940200 | 2.13549300  |
| C | -0.46721400 | -1.73267100 | 3.25059600  |
| O | -1.52249800 | -0.76146400 | 1.70962700  |
| H | -0.77991600 | -2.66188700 | 1.36492400  |
| H | 0.52268800  | -1.34990300 | 3.03489200  |
| H | -0.72709000 | -1.88486100 | 4.29243500  |
| C | -2.64904200 | -2.78780600 | 2.48286000  |
| H | -3.25543100 | -2.89325900 | 1.58152500  |
| H | -2.46445000 | -3.78476500 | 2.89784200  |
| H | -3.20951700 | -2.19780900 | 3.21551400  |
| O | -1.10432700 | 0.41685800  | 3.93143500  |
| H | -1.41945100 | 0.24911600  | 3.00406900  |
| H | -1.89823900 | 0.39629900  | 4.48427000  |
| H | -1.26311100 | 2.44478700  | -1.13624500 |
| H | -1.59326700 | 2.22946600  | 1.86173000  |
| S | 0.97920100  | 1.13804400  | -2.26882600 |
| O | 0.84414100  | 1.20124300  | -3.72874500 |
| O | 1.01059900  | 2.42718300  | -1.54033600 |
| O | -0.11685100 | 0.18378800  | -1.73733000 |
| C | 2.50599700  | 0.29355800  | -1.89042200 |
| C | 2.63856600  | -1.05266000 | -2.23173800 |
| C | 3.55474000  | 0.98672000  | -1.29334400 |
| C | 3.83659000  | -1.70402800 | -1.95973800 |
| H | 1.80308500  | -1.57868400 | -2.67872200 |
| C | 4.74953300  | 0.32069700  | -1.02746500 |
| H | 3.41949000  | 2.03074100  | -1.03629600 |
| C | 4.90560900  | -1.03099800 | -1.35079300 |
| H | 3.94423500  | -2.75533600 | -2.21332300 |
| H | 5.56639300  | 0.85376400  | -0.54912100 |
| C | 6.17540600  | -1.76167100 | -0.99914000 |
| H | 6.12776300  | -2.13649400 | 0.03105400  |
| H | 6.34112000  | -2.62091200 | -1.65531600 |
| H | 7.04842200  | -1.10565700 | -1.06602700 |

### III-t (PO-Co<sup>III</sup>-OTs + H<sub>2</sub>O)

PO-Co<sup>III</sup>-OTs + H<sub>2</sub>O = PG + Co<sup>III</sup>(salen)-OTs

Charge: 0

Spin Multiplicity: 1

Sum of electronic and thermal Free Energies (a.u.): -2343.333730

Thermal correction to Gibbs Free Energy (a.u.): 0.544139

No imaginary frequency

Calculation of single point energy based on the optimized structure, Er = -3582.4053724 a.u.

|   |             |             |             |
|---|-------------|-------------|-------------|
| C | -4.08362500 | -3.89795100 | -1.34547200 |
| C | -5.09665000 | -2.93262200 | -1.52014300 |
| C | -2.78845400 | -3.53150100 | -1.03596700 |
| H | -4.32316200 | -4.95173000 | -1.46003400 |
| C | -4.76683000 | -1.59935300 | -1.38871100 |
| H | -6.10850600 | -3.23267500 | -1.76862600 |
| C | -2.42225800 | -2.16560100 | -0.86546400 |
| H | -2.00527700 | -4.27155000 | -0.90936600 |
| C | -3.45335500 | -1.18773600 | -1.05599700 |

|    |             |             |             |
|----|-------------|-------------|-------------|
| H  | -5.52208000 | -0.83168800 | -1.54376500 |
| O  | -1.19309400 | -1.89613100 | -0.54484600 |
| C  | -3.18951100 | 0.21828200  | -0.96358400 |
| Co | -0.58417100 | -0.22122200 | 0.09912000  |
| N  | -2.09284800 | 0.74358300  | -0.53884100 |
| H  | -3.99586400 | 0.88102700  | -1.27610300 |
| N  | -0.06387300 | 1.42173100  | 0.91674400  |
| C  | -1.82873900 | 2.18482700  | -0.53334600 |
| C  | 1.07210800  | 1.64538900  | 1.48790800  |
| C  | -1.09818400 | 2.46316900  | 0.78828800  |
| C  | -3.03697600 | 3.10292700  | -0.70047100 |
| H  | 1.27928300  | 2.65318500  | 1.84479900  |
| C  | 2.10230400  | 0.68066900  | 1.72296600  |
| C  | -0.61884300 | 3.91362700  | 0.84581300  |
| C  | -2.58006300 | 4.56804700  | -0.63506100 |
| H  | -3.76914600 | 2.88977300  | 0.09001500  |
| H  | -3.52571400 | 2.91685800  | -1.66263000 |
| C  | 3.28709700  | 1.11380900  | 2.36415800  |
| C  | 1.94628000  | -0.69654300 | 1.36757900  |
| C  | -1.81119600 | 4.86421800  | 0.65758000  |
| H  | -0.14034500 | 4.12797400  | 1.80741100  |
| H  | 0.12877300  | 4.05873700  | 0.05810100  |
| H  | -3.44782100 | 5.23043200  | -0.72028300 |
| H  | -1.93407400 | 4.77777900  | -1.49691800 |
| C  | 4.30460800  | 0.23441800  | 2.66754400  |
| H  | 3.38090200  | 2.16797000  | 2.61398400  |
| C  | 3.00590100  | -1.58103300 | 1.70088700  |
| O  | 0.88552200  | -1.19009900 | 0.79265400  |
| H  | -2.49145200 | 4.76346100  | 1.51428300  |
| H  | -1.45703900 | 5.90033200  | 0.65831200  |
| C  | 4.14524300  | -1.12566600 | 2.33329600  |
| H  | 5.20872900  | 0.57928300  | 3.15700400  |
| H  | 2.88931100  | -2.62178200 | 1.42133900  |
| H  | 4.93734100  | -1.83088800 | 2.57032600  |
| C  | -1.49968500 | -1.99402500 | 2.37076900  |
| C  | -1.05472600 | -0.79920700 | 3.09857500  |
| O  | -1.63862600 | -0.65193500 | 1.76880400  |
| H  | -0.72324000 | -2.55167700 | 1.85587400  |
| H  | 0.00259500  | -0.56483100 | 3.14230500  |
| H  | -1.68596000 | -0.37148100 | 3.87323600  |
| C  | -2.80171100 | -2.68507700 | 2.64997800  |
| H  | -3.17565500 | -3.15820000 | 1.73776100  |
| H  | -2.64631200 | -3.46640700 | 3.40121100  |
| H  | -3.55062200 | -1.97725200 | 3.01394000  |
| O  | -4.39333600 | 0.18879800  | 1.88344500  |
| H  | -3.44265500 | 0.02307400  | 1.78511700  |
| H  | -4.78146700 | -0.44378900 | 1.26508600  |
| H  | -1.10931700 | 2.37106500  | -1.33831800 |
| H  | -1.82253700 | 2.28817500  | 1.59929200  |
| S  | 1.32146400  | 1.00009200  | -2.10110600 |
| O  | 1.23224300  | 1.04571400  | -3.56429700 |
| O  | 1.36767400  | 2.29313400  | -1.38586000 |
| O  | 0.16514300  | 0.08241500  | -1.60873900 |
| C  | 2.79018000  | 0.09010700  | -1.65600000 |
| C  | 2.82829100  | -1.28674300 | -1.87760300 |
| C  | 3.89329100  | 0.76549300  | -1.14117500 |
| C  | 3.99042300  | -1.98717300 | -1.57159500 |
| H  | 1.94928100  | -1.79448300 | -2.25711500 |
| C  | 5.04929400  | 0.04935800  | -0.84048900 |
| H  | 3.82981000  | 1.83330600  | -0.96827500 |
| C  | 5.11343600  | -1.33313800 | -1.04648600 |
| H  | 4.02530900  | -3.06148400 | -1.73192600 |
| H  | 5.90805100  | 0.56856600  | -0.42454200 |
| C  | 6.34369800  | -2.11039700 | -0.65442700 |
| H  | 6.29210000  | -2.40580500 | 0.40137900  |
| H  | 6.44803800  | -3.02464300 | -1.24555800 |
| H  | 7.25268600  | -1.51493500 | -0.78057800 |

**III-t (PO-Co<sup>III</sup>-OTs + H<sub>2</sub>O)**

PO-Co<sup>III</sup>-OTs + H<sub>2</sub>O = PG + Co<sup>III</sup>(salen)-OTs



Charge: 0

Spin Multiplicity: 1

Sum of electronic and thermal Free Energies (a.u.): -2343.358967

Thermal correction to Gibbs Free Energy (a.u.): 0.548689

No imaginary frequency

Calculation of single point energy based on the optimized structure,  $E_p = -3582.4340271$  a.u.

|    |             |             |             |
|----|-------------|-------------|-------------|
| C  | -4.38511700 | -3.35046700 | -2.06573800 |
| C  | -5.38728300 | -2.37180200 | -1.90280500 |
| C  | -3.06253800 | -3.07759400 | -1.77824900 |
| H  | -4.65583000 | -4.33877100 | -2.42797400 |
| C  | -5.02005300 | -1.12024500 | -1.45416700 |
| H  | -6.42192100 | -2.59673000 | -2.13703400 |
| C  | -2.65526800 | -1.80194500 | -1.29478000 |
| H  | -2.28786600 | -3.82559500 | -1.90994100 |
| C  | -3.67698200 | -0.80894400 | -1.13553500 |
| H  | -5.76996500 | -0.34124800 | -1.33528600 |
| O  | -1.39536000 | -1.62278900 | -1.03150100 |
| C  | -3.37279200 | 0.52577400  | -0.71577300 |
| Co | -0.70319700 | -0.17802900 | -0.02632200 |
| N  | -2.22943600 | 0.92814000  | -0.27647300 |
| H  | -4.18284400 | 1.25231100  | -0.79448000 |
| N  | -0.08576200 | 1.21179500  | 1.13720600  |
| C  | -1.90256600 | 2.32547500  | 0.01191700  |
| C  | 1.06286100  | 1.23085800  | 1.73005900  |
| C  | -1.06770700 | 2.30131100  | 1.29989000  |
| C  | -3.06431000 | 3.30917900  | 0.11848200  |
| H  | 1.31593500  | 2.10319600  | 2.33172600  |
| C  | 2.05072400  | 0.19941400  | 1.69127700  |
| C  | -0.50358300 | 3.69005700  | 1.60509300  |
| C  | -2.51513800 | 4.71072400  | 0.42662900  |
| H  | -3.75570200 | 2.99004700  | 0.91116600  |
| H  | -3.62952300 | 3.33333200  | -0.81903100 |
| C  | 3.23890300  | 0.39117600  | 2.43609700  |
| C  | 1.85811700  | -1.01374300 | 0.95454900  |
| C  | -1.64792600 | 4.71199100  | 1.69099500  |
| H  | 0.04452200  | 3.68880500  | 2.55314300  |
| H  | 0.20001000  | 3.95087200  | 0.80811400  |
| H  | -3.34354800 | 5.41896100  | 0.53355500  |
| H  | -1.91356200 | 5.05036900  | -0.42553900 |
| C  | 4.22270100  | -0.57287400 | 2.48824000  |
| H  | 3.36099300  | 1.32710300  | 2.97620900  |
| C  | 2.88619600  | -1.99367400 | 1.03512500  |
| O  | 0.80430700  | -1.28835800 | 0.24668500  |
| H  | -2.27745400 | 4.47937800  | 2.56139800  |
| H  | -1.23368400 | 5.71078000  | 1.86364200  |
| C  | 4.02545800  | -1.77805300 | 1.78339100  |
| H  | 5.12676100  | -0.41319600 | 3.06536600  |
| H  | 2.74101300  | -2.90853100 | 0.47205300  |
| H  | 4.78762200  | -2.55182700 | 1.82316900  |
| C  | -1.42739400 | -2.43302700 | 1.82586100  |
| C  | -0.47883400 | -2.52945100 | 3.02571100  |
| O  | -1.60216200 | -1.01285500 | 1.55196400  |
| H  | -0.95884700 | -2.85645900 | 0.93764100  |
| H  | 0.54237300  | -2.30400900 | 2.71986100  |
| H  | -0.50274000 | -3.53726000 | 3.45713900  |
| C  | -2.80236100 | -3.03952600 | 2.06548800  |
| H  | -3.44774300 | -2.85946500 | 1.20380100  |
| H  | -2.71695900 | -4.12085500 | 2.21447800  |
| H  | -3.28311600 | -2.60422600 | 2.94996200  |
| O  | -0.81808400 | -1.53012300 | 3.99970700  |
| H  | -1.37134000 | -0.56334400 | 2.38854800  |
| H  | -1.61245800 | -1.81879000 | 4.46852200  |
| H  | -1.22980100 | 2.65230000  | -0.78756800 |
| H  | -1.74439600 | 2.00196800  | 2.11803800  |
| S  | 1.08514400  | 1.54424500  | -1.97805600 |
| O  | 0.96121300  | 1.90391600  | -3.39479200 |
| O  | 1.15615400  | 2.65532900  | -1.00362300 |
| O  | -0.06304600 | 0.54728300  | -1.66041200 |
| C  | 2.56771500  | 0.57305000  | -1.77587400 |

|   |            |             |             |
|---|------------|-------------|-------------|
| C | 2.62777500 | -0.69968300 | -2.34359200 |
| C | 3.65799400 | 1.10730200  | -1.09500000 |
| C | 3.79824000 | -1.44010000 | -2.21702200 |
| H | 1.75927800 | -1.10435500 | -2.84998700 |
| C | 4.82338100 | 0.35330500  | -0.97737500 |
| H | 3.57751900 | 2.09521800  | -0.65726400 |
| C | 4.90860700 | -0.92867600 | -1.53065900 |
| H | 3.85025700 | -2.43657600 | -2.64757500 |
| H | 5.67207700 | 0.75913700  | -0.43422800 |
| C | 6.14741800 | -1.76492000 | -1.33941900 |
| H | 6.09659900 | -2.31339000 | -0.39022400 |
| H | 6.26377100 | -2.50192700 | -2.13910600 |
| H | 7.04934900 | -1.14648900 | -1.30894800 |

### III-m (PO-Co<sup>III</sup>-OTs + H<sub>2</sub>O)

PO-Co<sup>III</sup>-OTs + H<sub>2</sub>O = PG + Co<sup>III</sup>(salen)-OTs

Charge: 0

Spin Multiplicity: 1

Sum of electronic and thermal Free Energies (a.u.): -2343.280485

Thermal correction to Gibbs Free Energy (a.u.): 0.540555

Imaginary frequencies: -289.82

Calculation of single point energy based on the optimized structure, Et = -3582.3581384 a.u.

|    |             |             |             |
|----|-------------|-------------|-------------|
| C  | -4.06335400 | -4.20309800 | -1.09345600 |
| C  | -5.10799000 | -3.28913800 | -1.33936200 |
| C  | -2.78566800 | -3.76855400 | -0.80106100 |
| H  | -4.26363000 | -5.27044600 | -1.13909500 |
| C  | -4.82965900 | -1.93831500 | -1.28632300 |
| C  | -2.46863900 | -2.38192200 | -0.73146300 |
| C  | -3.53702700 | -1.45605100 | -0.97636700 |
| H  | -5.61466900 | -1.21200600 | -1.48612500 |
| O  | -1.24440700 | -2.04848700 | -0.45860100 |
| C  | -3.32932600 | -0.03820400 | -0.97263300 |
| Co | -0.69506200 | -0.31127700 | 0.06261000  |
| N  | -2.24882100 | 0.55919300  | -0.60405300 |
| H  | -4.16403000 | 0.56967600  | -1.32515200 |
| N  | -0.19364600 | 1.40994400  | 0.72209000  |
| C  | -2.02444000 | 2.00101000  | -0.72196500 |
| C  | 0.93967900  | 1.70571800  | 1.25556100  |
| C  | -1.26186700 | 2.40857800  | 0.54780700  |
| C  | -3.25314600 | 2.87948200  | -0.94219900 |
| H  | 1.12544900  | 2.74093100  | 1.53922800  |
| C  | 2.00488900  | 0.78667100  | 1.53951000  |
| C  | -0.81832000 | 3.86983100  | 0.46581100  |
| C  | -2.82270500 | 4.35183500  | -1.02214200 |
| H  | -3.96527300 | 2.73775700  | -0.11695100 |
| H  | -3.76385600 | 2.59559200  | -1.86825300 |
| C  | 3.17620900  | 1.29691700  | 2.14419700  |
| C  | 1.89541800  | -0.61470300 | 1.26878000  |
| C  | -2.03448200 | 4.77598200  | 0.22224500  |
| H  | -0.32471400 | 4.17865500  | 1.39342900  |
| H  | -0.09223400 | 3.95956100  | -0.34949300 |
| H  | -3.70356200 | 4.98988700  | -1.15063100 |
| H  | -2.19663400 | 4.49026200  | -1.91239200 |
| C  | 4.22650200  | 0.47368500  | 2.49598900  |
| H  | 3.23445600  | 2.36695100  | 2.32945100  |
| C  | 2.99109100  | -1.43853500 | 1.64428800  |
| O  | 0.84987000  | -1.18103100 | 0.73987400  |
| H  | -2.69512000 | 4.73825300  | 1.09959300  |
| H  | -1.70359900 | 5.81526400  | 0.12404500  |
| C  | 4.11598300  | -0.90800300 | 2.24339300  |
| H  | 4.93352000  | -1.56966100 | 2.51715700  |
| H  | -1.94591600 | 2.28124200  | 1.40124400  |
| H  | -1.32971200 | 2.13535200  | -1.55824300 |
| O  | -2.90865000 | 0.61356400  | 3.55661200  |
| H  | -3.85419900 | 0.41422200  | 3.54531000  |
| H  | -2.57249400 | 0.33680900  | 2.66367400  |
| C  | -1.32300100 | -1.31310500 | 3.69067600  |
| C  | -1.45683700 | -1.85293000 | 2.32845400  |
| O  | -1.68415500 | -0.62447200 | 1.67659600  |

|   |             |             |             |
|---|-------------|-------------|-------------|
| H | -2.08680400 | -1.51337200 | 4.43815400  |
| H | -2.28660600 | -2.55772800 | 2.20129200  |
| H | -0.51901900 | -2.31214600 | 1.97355200  |
| C | -0.16978000 | -0.52256600 | 4.13080000  |
| H | -0.50886200 | 0.38222700  | 4.64562500  |
| H | 0.35293600  | -1.12683500 | 4.89236800  |
| H | 0.52102100  | -0.28080100 | 3.32709300  |
| H | 5.11909700  | 0.88032600  | 2.95866200  |
| H | 2.91031400  | -2.49738700 | 1.42613800  |
| H | -1.97564300 | -4.46842700 | -0.62412700 |
| H | -6.10609100 | -3.64162000 | -1.57544700 |
| S | 1.09381000  | 0.83199500  | -2.31834000 |
| O | 0.98732400  | 0.75355800  | -3.78043000 |
| O | 1.08808600  | 2.18668600  | -1.72000200 |
| O | 0.01115100  | -0.09223300 | -1.71588900 |
| C | 2.62463300  | 0.05044500  | -1.83228700 |
| C | 2.74723700  | -1.33381900 | -1.95424800 |
| C | 3.68772000  | 0.82587300  | -1.37808800 |
| C | 3.95204300  | -1.93871400 | -1.61121700 |
| H | 1.89862500  | -1.92019100 | -2.28681300 |
| C | 4.88756200  | 0.20542000  | -1.03790700 |
| H | 3.55847000  | 1.89754700  | -1.28244400 |
| C | 5.03577400  | -1.18166000 | -1.14550600 |
| H | 4.05215800  | -3.01775100 | -1.69469900 |
| H | 5.71528700  | 0.80453500  | -0.66867800 |
| C | 6.31426700  | -1.85162500 | -0.71166900 |
| H | 6.29603000  | -2.05462800 | 0.36684400  |
| H | 6.46200200  | -2.80716800 | -1.22293700 |
| H | 7.18590000  | -1.22000000 | -0.90767200 |

### III-m (PO-Co<sup>III</sup>-OTs + H<sub>2</sub>O)

PO-Co<sup>III</sup>-OTs + H<sub>2</sub>O = PG + Co<sup>III</sup>(salen)-OTs

Charge: 0

Spin Multiplicity: 1

Sum of electronic and thermal Free Energies (a.u.): -2343.328107

Thermal correction to Gibbs Free Energy (a.u.): 0.542499

No imaginary frequency

Calculation of single point energy based on the optimized structure, Er = -3582.3996235 a.u.

|    |             |             |             |
|----|-------------|-------------|-------------|
| C  | -3.65769700 | -4.59418500 | -0.28799900 |
| C  | -4.71829700 | -3.84126200 | -0.83471000 |
| C  | -2.45252700 | -4.00539900 | 0.03650900  |
| H  | -3.78807100 | -5.66055600 | -0.12353100 |
| C  | -4.52902000 | -2.49219000 | -1.04484700 |
| C  | -2.22861200 | -2.61282300 | -0.16018700 |
| C  | -3.31129000 | -1.85017200 | -0.71142900 |
| H  | -5.32466000 | -1.89044700 | -1.47912900 |
| O  | -1.07082700 | -2.12817700 | 0.17069000  |
| C  | -3.19434200 | -0.45011100 | -0.98127700 |
| Co | -0.63473900 | -0.28807100 | 0.26439200  |
| N  | -2.20472500 | 0.30402100  | -0.63943200 |
| H  | -4.02668000 | 0.00429000  | -1.52010000 |
| N  | -0.26654400 | 1.56137200  | 0.53103600  |
| C  | -2.08701900 | 1.71361400  | -1.03012200 |
| C  | 0.87806600  | 2.04495600  | 0.88001700  |
| C  | -1.40636900 | 2.41340500  | 0.15609000  |
| C  | -3.38444500 | 2.42320800  | -1.41359000 |
| H  | 1.00595000  | 3.12600600  | 0.87372500  |
| C  | 2.01336200  | 1.28753100  | 1.30818300  |
| C  | -1.08825400 | 3.86902700  | -0.18191100 |
| C  | -3.09130500 | 3.89419200  | -1.74403700 |
| H  | -4.08715200 | 2.34718800  | -0.57424400 |
| H  | -3.84233500 | 1.94190400  | -2.28421200 |
| C  | 3.19559300  | 1.98761300  | 1.64233300  |
| C  | 1.95939600  | -0.13385000 | 1.45583600  |
| C  | -2.37569400 | 4.60203900  | -0.58811600 |
| H  | -0.64132800 | 4.37749800  | 0.67948600  |
| H  | -0.35638100 | 3.88616400  | -0.99807100 |
| H  | -4.02566300 | 4.41201400  | -1.98540100 |
| H  | -2.46231100 | 3.93986200  | -2.64228400 |
| C  | 4.31133000  | 1.33081100  | 2.11719100  |

|   |             |             |             |
|---|-------------|-------------|-------------|
| H | 3.20809600  | 3.06721400  | 1.51314300  |
| C | 3.11841900  | -0.78267600 | 1.95620000  |
| O | 0.90299400  | -0.85688700 | 1.20347700  |
| H | -3.04905800 | 4.65307900  | 0.27783700  |
| H | -2.13859100 | 5.63464100  | -0.86512800 |
| C | 4.25597500  | -0.06829000 | 2.27560300  |
| H | 5.12753500  | -0.59940100 | 2.64884500  |
| H | -2.11756700 | 2.38118000  | 0.99397500  |
| H | -1.38145900 | 1.74623200  | -1.86881500 |
| O | -4.19121600 | 1.08734700  | 1.80866800  |
| H | -4.99834500 | 0.70169000  | 1.44790800  |
| H | -3.49609100 | 0.44542900  | 1.59123100  |
| C | -1.61662400 | -0.01637100 | 3.39395300  |
| C | -1.52262500 | -1.41075500 | 2.93691800  |
| O | -1.77013100 | -0.35547900 | 1.96804800  |
| H | -2.57992200 | 0.31935200  | 3.77344800  |
| H | -2.36045700 | -2.09268700 | 3.04846800  |
| H | -0.53968300 | -1.85448500 | 2.81206000  |
| C | -0.42766700 | 0.78717200  | 3.82563700  |
| H | -0.53582800 | 1.83058500  | 3.51872800  |
| H | -0.37176500 | 0.76258100  | 4.91933000  |
| H | 0.49919700  | 0.39034300  | 3.41694400  |
| H | 5.21398500  | 1.87821500  | 2.36540400  |
| H | 3.07902200  | -1.86117100 | 2.05741400  |
| H | -1.63074300 | -4.58394100 | 0.44516600  |
| H | -5.65754500 | -4.31773400 | -1.09295500 |
| S | 1.16851200  | 0.34611000  | -2.26773400 |
| O | 1.00672200  | -0.03311100 | -3.67556000 |
| O | 1.15962500  | 1.79025900  | -1.95402400 |
| O | 0.10763800  | -0.45648500 | -1.46202200 |
| C | 2.71376000  | -0.32617400 | -1.68014300 |
| C | 2.81503700  | -1.69999500 | -1.45783200 |
| C | 3.81017000  | 0.51304900  | -1.50286100 |
| C | 4.03476700  | -2.22879600 | -1.04843000 |
| H | 1.94051200  | -2.32872700 | -1.57786200 |
| C | 5.02367600  | -0.03281100 | -1.09220800 |
| H | 3.69763800  | 1.57809100  | -1.66784300 |
| C | 5.15285500  | -1.40601400 | -0.85588500 |
| H | 4.11961200  | -3.29632100 | -0.86318100 |
| H | 5.87863900  | 0.61924600  | -0.93683900 |
| C | 6.45128200  | -1.97766200 | -0.34635300 |
| H | 6.49154200  | -1.92828900 | 0.74945500  |
| H | 6.56809600  | -3.02734600 | -0.63053500 |
| H | 7.31261300  | -1.42151500 | -0.72794000 |

### III-m (PO-Co<sup>III</sup>-OTs + H<sub>2</sub>O)

PO-Co<sup>III</sup>-OTs + H<sub>2</sub>O = PG + Co<sup>III</sup>(salen)-OTs

Charge: 0

Spin Multiplicity: 1

Sum of electronic and thermal Free Energies (a.u.): -2343.354911

Thermal correction to Gibbs Free Energy (a.u.): 0.548360

No imaginary frequency

Calculation of single point energy based on the optimized structure, E<sub>p</sub> = -3582.431336 a.u.

|    |             |             |             |
|----|-------------|-------------|-------------|
| C  | -4.16629000 | -3.59956000 | -2.18806900 |
| C  | -5.21718700 | -2.66280900 | -2.10092900 |
| C  | -2.87547300 | -3.26514700 | -1.83122900 |
| H  | -4.37346800 | -4.60413600 | -2.54764000 |
| C  | -4.93076600 | -1.39050100 | -1.65299000 |
| C  | -2.54967100 | -1.96389800 | -1.35362200 |
| C  | -3.62236800 | -1.01554800 | -1.26439900 |
| H  | -5.71906600 | -0.64339200 | -1.59047400 |
| O  | -1.31275900 | -1.72078300 | -1.04115400 |
| C  | -3.40233300 | 0.33704700  | -0.85222600 |
| Co | -0.73904600 | -0.23004700 | -0.02878000 |
| N  | -2.30371000 | 0.79949000  | -0.35877200 |
| H  | -4.23971700 | 1.02372800  | -0.98524600 |
| N  | -0.22902000 | 1.20797000  | 1.12554200  |
| C  | -2.05676200 | 2.21423300  | -0.07649700 |
| C  | 0.93034000  | 1.33474200  | 1.68335100  |
| C  | -1.27166800 | 2.24351100  | 1.24354100  |

|   |             |             |             |
|---|-------------|-------------|-------------|
| C | -3.26976200 | 3.13913500  | -0.02567100 |
| H | 1.13510200  | 2.24644000  | 2.24279500  |
| C | 1.99029600  | 0.37741600  | 1.65510100  |
| C | -0.79474500 | 3.66233000  | 1.55752600  |
| C | -2.80692500 | 4.56929500  | 0.29196900  |
| H | -3.97539900 | 2.78996400  | 0.74136000  |
| H | -3.79717600 | 3.12766600  | -0.98514500 |
| C | 3.18274900  | 0.68650200  | 2.35307900  |
| C | 1.86210800  | -0.88089800 | 0.98466100  |
| C | -1.99265000 | 4.62379800  | 1.58985400  |
| H | -0.28426000 | 3.69598500  | 2.52585700  |
| H | -0.07492200 | 3.95583700  | 0.78610800  |
| H | -3.67461400 | 5.23396700  | 0.35950400  |
| H | -2.19000800 | 4.93456300  | -0.53841900 |
| C | 4.23278900  | -0.20358200 | 2.41719200  |
| H | 3.25385000  | 1.65349200  | 2.84553700  |
| C | 2.95919900  | -1.78088400 | 1.07270500  |
| O | 0.80449500  | -1.26346700 | 0.33435200  |
| H | -2.64342000 | 4.36388700  | 2.43647500  |
| H | -1.63789300 | 5.64378700  | 1.77067700  |
| C | 4.10219900  | -1.45039200 | 1.77071800  |
| H | 4.92071400  | -2.16400500 | 1.81583800  |
| H | -1.96295500 | 1.91534000  | 2.03838200  |
| H | -1.37073800 | 2.56659000  | -0.85404300 |
| O | -2.03334800 | -1.74254000 | 4.01834500  |
| H | -2.92336200 | -2.11913600 | 3.97368200  |
| H | -1.82231800 | -0.65104800 | 2.32548900  |
| C | -1.13634200 | -2.61081700 | 3.29541300  |
| C | -1.47021200 | -2.50866900 | 1.80407800  |
| O | -1.69267700 | -1.12040200 | 1.48233900  |
| H | -1.27902300 | -3.65331400 | 3.61205500  |
| H | -2.39171400 | -3.05111400 | 1.56303800  |
| H | -0.66200300 | -2.86621200 | 1.16698200  |
| C | 0.27020300  | -2.15423500 | 3.64509000  |
| H | 0.43148700  | -2.23781100 | 4.72236500  |
| H | 1.01521600  | -2.75779800 | 3.12235300  |
| H | 0.42485600  | -1.11358800 | 3.35271800  |
| H | 5.14051300  | 0.04588900  | 2.95545100  |
| H | 2.86370400  | -2.72856500 | 0.55522200  |
| H | -2.06277400 | -3.97964900 | -1.90874900 |
| H | -6.22577800 | -2.93609300 | -2.39093000 |
| S | 1.04269300  | 1.54258600  | -1.95947200 |
| O | 0.89071500  | 1.91996500  | -3.36900700 |
| O | 1.09728100  | 2.64210000  | -0.97132000 |
| O | -0.07356900 | 0.50941500  | -1.64396000 |
| C | 2.54932800  | 0.60225200  | -1.79071400 |
| C | 2.61015200  | -0.68438700 | -2.32603100 |
| C | 3.65696700  | 1.17642000  | -1.17294200 |
| C | 3.80019200  | -1.39840300 | -2.23133400 |
| H | 1.72770500  | -1.11974700 | -2.78015800 |
| C | 4.84093000  | 0.44825000  | -1.08659900 |
| H | 3.57506000  | 2.17284000  | -0.75517900 |
| C | 4.92839000  | -0.84696200 | -1.60867000 |
| H | 3.85335100  | -2.40552400 | -2.63627900 |
| H | 5.70362200  | 0.88485100  | -0.59136800 |
| C | 6.19109000  | -1.65396100 | -1.44817800 |
| H | 6.19289900  | -2.17728200 | -0.48338900 |
| H | 6.28813600  | -2.41075500 | -2.23179000 |
| H | 7.08088100  | -1.01794200 | -1.47366100 |

**IV-t (PO-Co<sup>III</sup>-OTs + H<sub>2</sub>O-Co<sup>III</sup>-OTs)**

PO-Co<sup>III</sup>-OTs + H<sub>2</sub>O-Co<sup>III</sup>-OTs = PG + 2Co<sup>III</sup>(salen)-OTs

Charge: 0

Spin Multiplicity: 1

Sum of electronic and thermal Free Energies (a.u.): -4417.150739

Thermal correction to Gibbs Free Energy (a.u.): 1.011164

Imaginary frequencies: -366.79

Calculation of single point energy based on the optimized structure, Et = -6895.0723022 a.u.

|   |            |             |             |
|---|------------|-------------|-------------|
| C | 0.56740300 | -0.53437100 | -2.94229600 |
|---|------------|-------------|-------------|

|    |             |             |             |
|----|-------------|-------------|-------------|
| C  | -0.27224100 | 0.55395200  | -2.42007200 |
| O  | 0.92902400  | -0.97858600 | -1.63562000 |
| H  | -0.04459800 | -1.32653800 | -3.38647200 |
| H  | -1.35389100 | 0.59803600  | -2.52535600 |
| H  | 0.25461300  | 1.36953600  | -1.93015900 |
| C  | 1.68971100  | -0.16429900 | -3.90243700 |
| H  | 2.33756900  | -1.03567700 | -4.03384000 |
| H  | 1.26569900  | 0.09235500  | -4.87896600 |
| H  | 2.28057200  | 0.66818700  | -3.52969100 |
| O  | -1.14085000 | -0.31898000 | -0.47332300 |
| H  | -0.55323900 | -1.04756900 | -0.78855800 |
| H  | -0.48872600 | 0.22567200  | 0.09967900  |
| C  | -1.14224000 | -4.24236200 | -3.72041100 |
| C  | -0.78329100 | -5.08498400 | -2.64835000 |
| C  | -1.84615300 | -3.07295900 | -3.50806100 |
| H  | -0.87024600 | -4.52086100 | -4.73512400 |
| C  | -1.17379800 | -4.72989000 | -1.37233400 |
| H  | -0.24034400 | -6.00660200 | -2.82697900 |
| C  | -2.21667900 | -2.65137900 | -2.19670900 |
| H  | -2.14293100 | -2.43315800 | -4.33293800 |
| C  | -1.87607500 | -3.53007600 | -1.11412200 |
| H  | -0.94605300 | -5.38168200 | -0.53182300 |
| O  | -2.82306000 | -1.51188800 | -2.06444700 |
| C  | -2.29699100 | -3.26671200 | 0.23314500  |
| Co | -3.05279500 | -0.59500300 | -0.40335100 |
| N  | -2.83369500 | -2.17085400 | 0.64428800  |
| H  | -2.15795600 | -4.07773900 | 0.94941300  |
| N  | -3.07230900 | 0.32086500  | 1.27029100  |
| C  | -3.35853300 | -1.96666200 | 1.99618400  |
| C  | -2.99997600 | 1.60244800  | 1.40417600  |
| C  | -2.87219200 | -0.57862100 | 2.42460500  |
| C  | -3.01303000 | -3.01261200 | 3.05100600  |
| H  | -2.92595300 | 2.00447400  | 2.41430600  |
| C  | -2.96460300 | 2.56707600  | 0.34655300  |
| C  | -3.53128600 | -0.15260200 | 3.73749900  |
| C  | -3.67639000 | -2.61462600 | 4.37966100  |
| H  | -1.92252600 | -3.07356700 | 3.17633500  |
| H  | -3.36801500 | -4.00202600 | 2.74278700  |
| C  | -2.80892400 | 3.92719800  | 0.69926700  |
| C  | -3.05709800 | 2.19481100  | -1.03214300 |
| C  | -3.25678100 | -1.20711100 | 4.82094700  |
| H  | -3.13094200 | 0.80971800  | 4.07215700  |
| H  | -4.60354600 | -0.03528800 | 3.55803300  |
| H  | -3.42211900 | -3.34574600 | 5.15460300  |
| H  | -4.76549000 | -2.64909200 | 4.25324100  |
| C  | -2.72154200 | 4.91878300  | -0.25660600 |
| H  | -2.75403300 | 4.18084700  | 1.75545700  |
| C  | -2.96819600 | 3.23724800  | -1.99457200 |
| O  | -3.21086800 | 0.97553700  | -1.45965400 |
| H  | -2.18458900 | -1.20712900 | 5.05253700  |
| H  | -3.78123200 | -0.93040800 | 5.74179400  |
| C  | -2.79406700 | 4.55434600  | -1.61548100 |
| H  | -2.59246700 | 5.95646600  | 0.03042900  |
| H  | -3.05434800 | 2.95617500  | -3.03869200 |
| H  | -2.71760500 | 5.32149300  | -2.38153800 |
| C  | -0.09082300 | 1.20323800  | 4.11986100  |
| C  | 0.26432000  | -0.01237000 | 4.72506600  |
| C  | 0.11987900  | 1.41221100  | 2.76393100  |
| H  | -0.52768600 | 1.99589300  | 4.72070800  |
| C  | 0.82935000  | -1.00912900 | 3.94735400  |
| H  | 0.11177600  | -0.16340300 | 5.78776000  |
| C  | 0.70311900  | 0.41314100  | 1.96111100  |
| H  | -0.14546800 | 2.34784400  | 2.28365800  |
| C  | 1.05941200  | -0.82323900 | 2.56898800  |
| H  | 1.12535200  | -1.95127200 | 4.40048700  |
| O  | 0.82035000  | 0.64005200  | 0.65741000  |
| C  | 1.68568000  | -1.89773000 | 1.83987400  |
| Co | 2.22515000  | -0.21660200 | -0.38913700 |
| N  | 2.09997200  | -1.84711200 | 0.62062900  |

|   |             |             |             |
|---|-------------|-------------|-------------|
| H | 1.85621900  | -2.81823600 | 2.40336200  |
| N | 3.56982900  | -1.09587900 | -1.36423200 |
| C | 2.92705600  | -2.93610900 | 0.06456900  |
| C | 4.60784400  | -0.49514300 | -1.82994400 |
| C | 3.32443500  | -2.53441100 | -1.36545600 |
| C | 2.28808900  | -4.32378700 | 0.03801600  |
| H | 5.42540300  | -1.09558500 | -2.22907300 |
| C | 4.75837500  | 0.93370600  | -1.86700900 |
| C | 4.41984300  | -3.46084900 | -1.87982900 |
| C | 3.31611600  | -5.32569100 | -0.51657300 |
| H | 1.39044600  | -4.30047400 | -0.59065500 |
| H | 1.97713200  | -4.62875600 | 1.04340900  |
| C | 6.02515600  | 1.47260200  | -2.17690800 |
| C | 3.64665900  | 1.80859500  | -1.63807000 |
| C | 3.86704400  | -4.89885700 | -1.88722200 |
| H | 4.72342000  | -3.17626300 | -2.89384300 |
| H | 5.30265100  | -3.38461200 | -1.23371000 |
| H | 2.86415000  | -6.32044600 | -0.59201500 |
| H | 4.14718600  | -5.40946500 | 0.19572100  |
| C | 6.22327800  | 2.83642200  | -2.27193300 |
| H | 6.85634700  | 0.78764600  | -2.32288000 |
| C | 3.86951200  | 3.19845000  | -1.78015000 |
| O | 2.43615300  | 1.38846100  | -1.35446500 |
| H | 3.06102700  | -4.95973300 | -2.63054700 |
| H | 4.64704600  | -5.59612200 | -2.21006400 |
| C | 5.12551100  | 3.69469400  | -2.08269000 |
| H | 7.20673500  | 3.23815400  | -2.48897700 |
| H | 3.02456100  | 3.85864300  | -1.61549100 |
| H | 5.26606600  | 4.76939600  | -2.16090500 |
| H | 3.84324600  | -2.95246400 | 0.66341400  |
| H | 2.43240800  | -2.66605500 | -1.99001700 |
| H | -4.44597400 | -1.90576300 | 1.88860000  |
| H | -1.78577300 | -0.64321300 | 2.57613800  |
| S | 4.64738500  | -0.08549200 | 1.65438000  |
| O | 4.31469900  | -0.25212000 | 3.07708700  |
| O | 5.23809000  | -1.26673800 | 0.98320800  |
| O | 3.43556500  | 0.51153000  | 0.89706000  |
| C | 5.82786800  | 1.24273600  | 1.44779500  |
| C | 5.39595200  | 2.56900400  | 1.43061300  |
| C | 7.17544900  | 0.92730900  | 1.29049100  |
| C | 6.32973300  | 3.58212400  | 1.24253400  |
| H | 4.34019300  | 2.79144600  | 1.52626400  |
| C | 8.09865700  | 1.95538800  | 1.10769800  |
| H | 7.48412700  | -0.11180100 | 1.29220700  |
| C | 7.69057100  | 3.29336100  | 1.07248900  |
| H | 5.99524500  | 4.61546000  | 1.20855700  |
| H | 9.15036500  | 1.71398700  | 0.97833900  |
| C | 8.68009000  | 4.40036800  | 0.80947800  |
| H | 8.63941800  | 4.71638500  | -0.24057000 |
| H | 8.46654000  | 5.28275500  | 1.42056700  |
| H | 9.70493700  | 4.08119800  | 1.01767200  |
| S | -6.12823500 | -0.36449800 | 0.19089200  |
| O | -7.31859200 | -1.07993900 | -0.27988100 |
| O | -5.93195100 | -0.25946800 | 1.65377400  |
| O | -4.90280900 | -1.00315700 | -0.51955600 |
| C | -6.20078300 | 1.30468200  | -0.43695600 |
| C | -6.23225400 | 1.51115000  | -1.81693900 |
| C | -6.25411000 | 2.37692600  | 0.44805300  |
| C | -6.29963900 | 2.81099200  | -2.30336100 |
| H | -6.17905900 | 0.66329200  | -2.48979600 |
| C | -6.32596500 | 3.67527500  | -0.05533500 |
| H | -6.23413200 | 2.18302500  | 1.51407100  |
| C | -6.34045100 | 3.91127000  | -1.43280700 |
| H | -6.31179000 | 2.98142900  | -3.37653200 |
| H | -6.35710600 | 4.51659200  | 0.63127600  |
| C | -6.34715100 | 5.31711200  | -1.97326100 |
| H | -6.84341500 | 6.00908600  | -1.28673600 |
| H | -5.31937500 | 5.67389300  | -2.11300400 |
| H | -6.85148600 | 5.37382400  | -2.94238000 |

**IV-t (PO-Co<sup>III</sup>-OTs + H<sub>2</sub>O-Co<sup>III</sup>-OTs)**PO-Co<sup>III</sup>-OTs + H<sub>2</sub>O-Co<sup>III</sup>-OTs = PG + 2Co<sup>III</sup>(salen)-OTs

Charge: 0

Spin Multiplicity: 1

Sum of electronic and thermal Free Energies (a.u.): -4417.205904

Thermal correction to Gibbs Free Energy (a.u.): 1.013272

No imaginary frequency

Calculation of single point energy based on the optimized structure, Er = -6895.1290144 a.u.

|    |             |             |             |
|----|-------------|-------------|-------------|
| C  | 0.75532700  | -0.42825500 | -3.28498400 |
| C  | 0.14875900  | 0.69432000  | -2.56212200 |
| O  | 0.77051700  | -0.40948100 | -1.80593000 |
| H  | 0.08186500  | -1.21817000 | -3.60816600 |
| H  | -0.92743900 | 0.73656700  | -2.41481100 |
| H  | 0.72236800  | 1.61055200  | -2.46666900 |
| C  | 2.04519300  | -0.31736800 | -4.04226000 |
| H  | 2.59358800  | -1.26274800 | -4.03341500 |
| H  | 1.80116400  | -0.08387500 | -5.08469900 |
| H  | 2.67526800  | 0.47210400  | -3.63840200 |
| O  | -1.07778100 | -0.74290400 | 0.04781200  |
| H  | -0.65525000 | -1.08658100 | -0.75988000 |
| H  | -0.60037300 | 0.11480800  | 0.16179400  |
| C  | -1.21220200 | -4.50428100 | -3.42984300 |
| C  | -1.25898600 | -5.43365700 | -2.37198000 |
| C  | -1.68720100 | -3.21575800 | -3.27122300 |
| H  | -0.81113900 | -4.80758200 | -4.39343500 |
| C  | -1.81000600 | -5.03458000 | -1.16910700 |
| H  | -0.89431800 | -6.44576500 | -2.50765700 |
| C  | -2.21895800 | -2.76077100 | -2.02952500 |
| H  | -1.69312600 | -2.51170500 | -4.09717200 |
| C  | -2.28379600 | -3.71891300 | -0.96446200 |
| H  | -1.87960100 | -5.73892000 | -0.34315000 |
| O  | -2.59737400 | -1.52044100 | -1.93657700 |
| C  | -2.84531600 | -3.39680300 | 0.31956200  |
| Co | -2.97945300 | -0.61646700 | -0.29168100 |
| N  | -3.20497100 | -2.22480900 | 0.70734200  |
| H  | -2.97082900 | -4.23355300 | 1.00796000  |
| N  | -3.10433100 | 0.27529500  | 1.38666700  |
| C  | -3.81752300 | -1.94411800 | 2.00894700  |
| C  | -2.97962200 | 1.54534200  | 1.57371600  |
| C  | -3.12988200 | -0.67009400 | 2.51686700  |
| C  | -3.76326800 | -3.05543500 | 3.05325600  |
| H  | -3.01463500 | 1.91594300  | 2.59628800  |
| C  | -2.74875500 | 2.53268400  | 0.56468800  |
| C  | -3.78380900 | -0.16634500 | 3.80304000  |
| C  | -4.41591900 | -2.56620200 | 4.35545300  |
| H  | -2.71810300 | -3.34005500 | 3.24151200  |
| H  | -4.28624500 | -3.94713900 | 2.69114300  |
| C  | -2.59850600 | 3.87649800  | 0.97588500  |
| C  | -2.60594200 | 2.18857000  | -0.81391200 |
| C  | -3.76109900 | -1.27653900 | 4.86356500  |
| H  | -3.24258200 | 0.70214500  | 4.19082500  |
| H  | -4.80926400 | 0.14014300  | 3.57180300  |
| H  | -4.35527400 | -3.35069900 | 5.11730700  |
| H  | -5.48166100 | -2.38286000 | 4.17072900  |
| C  | -2.30038400 | 4.87924100  | 0.07656400  |
| H  | -2.71486900 | 4.10537400  | 2.03247800  |
| C  | -2.31128200 | 3.24230400  | -1.72081900 |
| O  | -2.71251000 | 0.97854400  | -1.28635500 |
| H  | -2.71807900 | -1.48274600 | 5.14191300  |
| H  | -4.26516600 | -0.92935400 | 5.77159500  |
| C  | -2.14919300 | 4.54204700  | -1.28333800 |
| H  | -2.17921300 | 5.90476400  | 0.40755600  |
| H  | -2.22453700 | 2.98688600  | -2.77113300 |
| H  | -1.90645600 | 5.31801300  | -2.00443500 |
| C  | -0.16272800 | 2.14721800  | 3.73191000  |
| C  | -0.05788000 | 0.95510000  | 4.46932400  |
| C  | 0.18768700  | 2.19620900  | 2.39068600  |
| H  | -0.52119600 | 3.04980100  | 4.21973500  |
| C  | 0.41572300  | -0.18176900 | 3.83737500  |



|    |             |             |             |
|----|-------------|-------------|-------------|
| H  | -0.32477800 | 0.93134300  | 5.52013300  |
| C  | 0.65825400  | 1.04552500  | 1.72601000  |
| H  | 0.08704000  | 3.10553900  | 1.80994800  |
| C  | 0.78012100  | -0.16318800 | 2.47545900  |
| H  | 0.52623900  | -1.11002600 | 4.39170200  |
| O  | 0.86133700  | 1.09985600  | 0.41915500  |
| C  | 1.23919100  | -1.38560300 | 1.87586300  |
| Co | 2.19796600  | -0.00503000 | -0.41083700 |
| N  | 1.69182700  | -1.51127000 | 0.67310200  |
| H  | 1.20771400  | -2.27524600 | 2.50870500  |
| N  | 3.34921400  | -1.22422100 | -1.27430900 |
| C  | 2.26398100  | -2.78912000 | 0.21398600  |
| C  | 4.52251900  | -0.90995800 | -1.70192300 |
| C  | 2.77326000  | -2.56395700 | -1.21871000 |
| C  | 1.30670900  | -3.98008500 | 0.22216500  |
| H  | 5.19794200  | -1.70483100 | -2.01954700 |
| C  | 4.99322700  | 0.44230500  | -1.80377800 |
| C  | 3.61402900  | -3.75180500 | -1.67133500 |
| C  | 2.05207100  | -5.22825200 | -0.27898800 |
| H  | 0.44640200  | -3.76498200 | -0.42008700 |
| H  | 0.91708700  | -4.15655300 | 1.23071700  |
| C  | 6.36297400  | 0.66716700  | -2.06141600 |
| C  | 4.09348200  | 1.55452900  | -1.69591800 |
| C  | 2.71570500  | -5.00404800 | -1.64765600 |
| H  | 4.00095400  | -3.58973600 | -2.68415500 |
| H  | 4.47424400  | -3.87423700 | -1.00233300 |
| H  | 1.35503200  | -6.07005100 | -0.34296300 |
| H  | 2.82036000  | -5.50320400 | 0.45540900  |
| C  | 6.86428500  | 1.94388800  | -2.21943700 |
| H  | 7.02637100  | -0.19214700 | -2.11533300 |
| C  | 4.62887400  | 2.84844400  | -1.90306600 |
| O  | 2.80800300  | 1.43424600  | -1.46565300 |
| H  | 1.92954200  | -4.88856200 | -2.40537600 |
| H  | 3.29989700  | -5.88621400 | -1.92930200 |
| C  | 5.97705200  | 3.03387500  | -2.15084200 |
| H  | 7.92227100  | 2.10447600  | -2.39429100 |
| H  | 3.94486800  | 3.68721800  | -1.83068300 |
| H  | 6.35842000  | 4.04316500  | -2.28008100 |
| H  | 3.13518100  | -2.99016700 | 0.84527000  |
| H  | 1.88615200  | -2.52399400 | -1.86543400 |
| H  | -4.86082100 | -1.68104700 | 1.80595300  |
| H  | -2.07938800 | -0.92013100 | 2.72481100  |
| S  | 4.46910700  | -0.25622800 | 1.75019200  |
| O  | 4.04506300  | -0.26183400 | 3.15696300  |
| O  | 4.82537800  | -1.56978200 | 1.16870600  |
| O  | 3.43898900  | 0.53889700  | 0.89631300  |
| C  | 5.90614400  | 0.78841500  | 1.54415200  |
| C  | 5.76220200  | 2.17184100  | 1.43968100  |
| C  | 7.16378400  | 0.19231300  | 1.48382100  |
| C  | 6.89589900  | 2.95723600  | 1.26088700  |
| H  | 4.77332300  | 2.61325000  | 1.46302500  |
| C  | 8.28942100  | 0.99511500  | 1.30934300  |
| H  | 7.24786300  | -0.88616400 | 1.55328200  |
| C  | 8.17266900  | 2.38419100  | 1.18687400  |
| H  | 6.78735100  | 4.03366800  | 1.15969700  |
| H  | 9.27227600  | 0.53456700  | 1.25545100  |
| C  | 9.38391000  | 3.24539300  | 0.93237900  |
| H  | 9.46933000  | 3.48967600  | -0.13400000 |
| H  | 9.32401100  | 4.19267300  | 1.47691500  |
| H  | 10.30654400 | 2.73904300  | 1.22880200  |
| S  | -6.04754700 | 0.05106000  | -0.13349600 |
| O  | -7.25793300 | -0.55874500 | -0.69492700 |
| O  | -5.98345800 | 0.19733300  | 1.33822100  |
| O  | -4.83240200 | -0.72606200 | -0.70669800 |
| C  | -5.87540800 | 1.68707200  | -0.82522500 |
| C  | -5.65754000 | 1.82305000  | -2.19676000 |
| C  | -5.98454800 | 2.80463300  | -0.00351100 |
| C  | -5.53641500 | 3.09766600  | -2.73794100 |
| H  | -5.55933200 | 0.93913300  | -2.81606300 |

|   |             |            |             |
|---|-------------|------------|-------------|
| C | -5.86268100 | 4.07602900 | -0.56118600 |
| H | -6.15174500 | 2.66593000 | 1.05818000  |
| C | -5.63037100 | 4.24061300 | -1.93014000 |
| H | -5.35480400 | 3.21251800 | -3.80325100 |
| H | -5.93298300 | 4.95165700 | 0.07790400  |
| C | -5.42849900 | 5.61415600 | -2.51453100 |
| H | -6.01647400 | 6.36787500 | -1.98258800 |
| H | -4.37427200 | 5.90787700 | -2.43774900 |
| H | -5.70475700 | 5.64696000 | -3.57238100 |

**IV-t (PO-Co<sup>III</sup>-OTs + H<sub>2</sub>O-Co<sup>III</sup>-OTs)**

PO-Co<sup>III</sup>-OTs + H<sub>2</sub>O-Co<sup>III</sup>-OTs = PG + 2Co<sup>III</sup>(salen)-OTs

Charge: 0

Spin Multiplicity: 1

Sum of electronic and thermal Free Energies (a.u.): -4417.255258

Thermal correction to Gibbs Free Energy (a.u.): 1.017265

No imaginary frequency

Calculation of single point energy based on the optimized structure, Ep = -6895.1776404 a.u.

|    |             |             |             |
|----|-------------|-------------|-------------|
| C  | 0.20885200  | -2.14645600 | 0.53320700  |
| C  | 0.53205300  | -1.23454400 | 1.72357500  |
| O  | -0.53217700 | -1.42188200 | -0.48681900 |
| H  | 1.14580000  | -2.41116300 | 0.04326500  |
| H  | 1.35790100  | -1.66196800 | 2.29461700  |
| H  | -0.34584500 | -1.11446700 | 2.35792500  |
| C  | -0.54079900 | -3.39908100 | 0.94669100  |
| H  | -0.74382300 | -4.02209200 | 0.07136000  |
| H  | 0.07981300  | -3.97989200 | 1.63695400  |
| H  | -1.48207500 | -3.15591900 | 1.43867000  |
| O  | 0.93845000  | 0.08779800  | 1.31886800  |
| H  | 0.14160300  | -0.81586500 | -0.91749300 |
| H  | 0.13835800  | 0.56118800  | 0.92791000  |
| C  | 0.69426900  | 1.29528500  | -4.61298000 |
| C  | 0.84625000  | 2.68271700  | -4.45675400 |
| C  | 0.93579700  | 0.42790500  | -3.55934100 |
| H  | 0.39667600  | 0.89029500  | -5.57653300 |
| C  | 1.24723700  | 3.17318400  | -3.22713300 |
| H  | 0.66391100  | 3.35557700  | -5.28730300 |
| C  | 1.33167300  | 0.90887000  | -2.29374700 |
| H  | 0.83798500  | -0.64492300 | -3.67751600 |
| C  | 1.49472800  | 2.31478700  | -2.13602000 |
| H  | 1.36862600  | 4.24208900  | -3.07955300 |
| O  | 1.49139700  | 0.04543400  | -1.31161200 |
| C  | 1.90849200  | 2.90915900  | -0.89813600 |
| Co | 2.57644000  | 0.39809600  | 0.23940400  |
| N  | 2.24766100  | 2.28510900  | 0.17874400  |
| H  | 1.96734500  | 3.99761400  | -0.90102800 |
| N  | 3.42549000  | 0.72511200  | 1.90633100  |
| C  | 2.94389000  | 3.00294800  | 1.26430500  |
| C  | 4.11244900  | -0.12610600 | 2.58841200  |
| C  | 3.04259300  | 2.03889800  | 2.44651500  |
| C  | 2.32762200  | 4.33021700  | 1.71010500  |
| H  | 4.52726200  | 0.19705700  | 3.54249300  |
| C  | 4.37002800  | -1.48666000 | 2.22796700  |
| C  | 3.94830200  | 2.62512900  | 3.53063900  |
| C  | 3.21042800  | 4.95315900  | 2.80171000  |
| H  | 1.31560300  | 4.15338600  | 2.09333000  |
| H  | 2.23508700  | 5.02391400  | 0.86918900  |
| C  | 5.16184900  | -2.27270800 | 3.09630100  |
| C  | 3.80423500  | -2.07030300 | 1.05192600  |
| C  | 3.40675700  | 3.99183000  | 3.98029500  |
| H  | 3.99837900  | 1.96166800  | 4.40008800  |
| H  | 4.96145100  | 2.71966700  | 3.12301900  |
| H  | 2.76739300  | 5.89229300  | 3.14976000  |
| H  | 4.18770300  | 5.20347900  | 2.36953800  |
| C  | 5.40669300  | -3.60587300 | 2.84065600  |
| H  | 5.58005100  | -1.79917500 | 3.98153400  |
| C  | 4.07413600  | -3.44451200 | 0.81215100  |
| O  | 3.03706700  | -1.43627300 | 0.21365200  |
| H  | 2.44390400  | 3.84403000  | 4.48801700  |
| H  | 4.08572400  | 4.43079700  | 4.71877800  |

|    |              |             |             |
|----|--------------|-------------|-------------|
| C  | 4.84517200   | -4.18580900 | 1.68554600  |
| H  | 6.01466400   | -4.19829600 | 3.51544200  |
| H  | 3.65729200   | -3.88367800 | -0.08745000 |
| H  | 5.02312600   | -5.23674500 | 1.47335500  |
| C  | -1.07974300  | 4.63954200  | -0.27655500 |
| C  | -1.49738600  | 4.75908700  | -1.61180700 |
| C  | -1.01022200  | 3.40011500  | 0.34030900  |
| H  | -0.81797600  | 5.52982100  | 0.28903300  |
| C  | -1.84115900  | 3.61354900  | -2.30705700 |
| H  | -1.56110800  | 5.73247600  | -2.08538400 |
| C  | -1.34861200  | 2.22084400  | -0.35373800 |
| H  | -0.70160400  | 3.29988600  | 1.37459200  |
| C  | -1.77613600  | 2.33988600  | -1.70767100 |
| H  | -2.16809300  | 3.68005600  | -3.34026200 |
| O  | -1.22245100  | 1.06305700  | 0.26561000  |
| C  | -2.13325400  | 1.20435700  | -2.51034400 |
| Co | -2.25262500  | -0.46846200 | -0.23572400 |
| N  | -2.23619300  | -0.01342000 | -2.09494600 |
| H  | -2.35688000  | 1.41274300  | -3.55760700 |
| N  | -3.17715000  | -2.02217200 | -0.77715600 |
| C  | -2.82024800  | -1.05851700 | -2.95838600 |
| C  | -4.10831800  | -2.57370700 | -0.07930300 |
| C  | -2.83102800  | -2.36797200 | -2.15302100 |
| C  | -2.14652500  | -1.29641000 | -4.30941700 |
| H  | -4.71841000  | -3.34972700 | -0.54068600 |
| C  | -4.40024000  | -2.23757700 | 1.28494100  |
| C  | -3.69314300  | -3.40595600 | -2.86522000 |
| C  | -2.95653900  | -2.35437600 | -5.07731800 |
| H  | -1.11829600  | -1.64214200 | -4.15348800 |
| H  | -2.08912700  | -0.36906700 | -4.88799800 |
| C  | -5.57933200  | -2.74407700 | 1.87243000  |
| C  | -3.50074600  | -1.43823100 | 2.06090300  |
| C  | -3.11637000  | -3.65302000 | -4.27102000 |
| H  | -3.71046600  | -4.34631200 | -2.30263600 |
| H  | -4.72361000  | -3.03666500 | -2.93061600 |
| H  | -2.47718700  | -2.56874800 | -6.03839400 |
| H  | -3.94927800  | -1.94405300 | -5.30306500 |
| C  | -5.88961900  | -2.49205600 | 3.19441800  |
| H  | -6.25501100  | -3.32870600 | 1.25332500  |
| C  | -3.82290000  | -1.23126000 | 3.42442000  |
| O  | -2.38814500  | -0.93334200 | 1.59233800  |
| H  | -2.13475700  | -4.13495200 | -4.16921200 |
| H  | -3.75516800  | -4.35655400 | -4.81504900 |
| C  | -4.98816200  | -1.73954100 | 3.96940700  |
| H  | -6.80947000  | -2.86827300 | 3.62816700  |
| H  | -3.13606400  | -0.63367300 | 4.01450200  |
| H  | -5.21661400  | -1.54001900 | 5.01299000  |
| H  | -3.86498100  | -0.77203600 | -3.11521000 |
| H  | -1.79694600  | -2.73294000 | -2.10692200 |
| H  | 3.96720100   | 3.17208000  | 0.90852800  |
| H  | 2.02865200   | 1.90472500  | 2.85091300  |
| S  | -5.14842600  | 0.71012400  | -0.75896500 |
| O  | -5.21065800  | 2.03904000  | -1.38387500 |
| O  | -5.44054400  | -0.44047700 | -1.64501000 |
| O  | -3.82352600  | 0.56316900  | 0.03232600  |
| C  | -6.32513900  | 0.60400000  | 0.58507500  |
| C  | -6.00479800  | 1.11153500  | 1.84384200  |
| C  | -7.55680600  | -0.00387700 | 0.35137400  |
| C  | -6.92941700  | 0.99377400  | 2.87622000  |
| H  | -5.03141200  | 1.55604700  | 2.01144600  |
| C  | -8.47331800  | -0.10934100 | 1.39562400  |
| H  | -7.77646100  | -0.40433300 | -0.63165700 |
| C  | -8.17124400  | 0.37783100  | 2.67229700  |
| H  | -6.67597000  | 1.36961800  | 3.86382400  |
| H  | -9.43253900  | -0.58910700 | 1.21989900  |
| C  | -9.13549400  | 0.20096400  | 3.81802700  |
| H  | -8.86248000  | -0.67267400 | 4.42338800  |
| H  | -9.13166100  | 1.06954400  | 4.48361800  |
| H  | -10.15824200 | 0.04771400  | 3.46268900  |

|   |            |             |             |
|---|------------|-------------|-------------|
| S | 5.50661400 | 1.10377200  | -0.69018500 |
| O | 6.01177800 | 1.78386000  | -1.88781200 |
| O | 5.74377700 | 1.75785000  | 0.61480900  |
| O | 4.00792500 | 0.78567700  | -0.94230200 |
| C | 6.24257800 | -0.51987000 | -0.60946800 |
| C | 5.95018500 | -1.44286800 | -1.61407100 |
| C | 7.09643300 | -0.84862400 | 0.43873000  |
| C | 6.51602100 | -2.71144800 | -1.55192600 |
| H | 5.27143300 | -1.17094800 | -2.41409200 |
| C | 7.65596800 | -2.12353800 | 0.48659300  |
| H | 7.30011800 | -0.11219700 | 1.20710800  |
| C | 7.36914700 | -3.07294000 | -0.49979800 |
| H | 6.28472300 | -3.43992400 | -2.32447100 |
| H | 8.31073900 | -2.39095900 | 1.31106600  |
| C | 7.92122600 | -4.47125100 | -0.39997900 |
| H | 8.92621400 | -4.47703100 | 0.03246600  |
| H | 7.28462400 | -5.08713400 | 0.24755700  |
| H | 7.96620500 | -4.95797400 | -1.37829900 |

#### IV-m (PO-Co<sup>III</sup>-OTs + H<sub>2</sub>O-Co<sup>III</sup>-OTs)

PO-Co<sup>III</sup>-OTs + H<sub>2</sub>O-Co<sup>III</sup>-OTs = PG + 2Co<sup>III</sup>(salen)-OTs

Charge: 0

Spin Multiplicity: 1

Sum of electronic and thermal Free Energies (a.u.): -4417.154924

Thermal correction to Gibbs Free Energy (a.u.): 1.011764

Imaginary frequencies: -254.30

Calculation of single point energy based on the optimized structure, Et = -6895.0817176 a.u.

|   |            |             |             |
|---|------------|-------------|-------------|
| N | 2.28981000 | -1.60597600 | 0.61426000  |
| N | 3.35330800 | 0.73827600  | 0.81877000  |
| C | 1.86590500 | -2.78359000 | 0.30312300  |
| H | 1.80426600 | -3.52906700 | 1.09666800  |
| C | 3.57249300 | 2.01042500  | 0.83064200  |
| H | 3.93673100 | 2.45940200  | 1.75395800  |
| C | 1.43828900 | -3.21577400 | -0.99452000 |
| C | 1.06030600 | -4.56967700 | -1.14804400 |
| C | 1.33453000 | -2.31746000 | -2.10490800 |
| C | 0.57239300 | -5.05766600 | -2.34396900 |
| H | 1.16735900 | -5.23273600 | -0.29249600 |
| C | 0.81834100 | -2.84415200 | -3.32064400 |
| C | 0.45094400 | -4.17144300 | -3.43345800 |
| H | 0.29435900 | -6.10063400 | -2.44654400 |
| H | 0.75135800 | -2.16707300 | -4.16573200 |
| H | 0.07537300 | -4.53979600 | -4.38437800 |
| C | 3.40862700 | 2.90603000  | -0.27525600 |
| C | 3.66080000 | 4.27863000  | -0.05541400 |
| C | 3.09286300 | 2.44026600  | -1.59113100 |
| C | 3.60489600 | 5.20175500  | -1.08141300 |
| H | 3.91496600 | 4.59872700  | 0.95225900  |
| C | 3.05114300 | 3.41122100  | -2.63070500 |
| C | 3.29946100 | 4.74801800  | -2.37977400 |
| H | 3.79801200 | 6.25228700  | -0.89444800 |
| H | 2.83737100 | 3.05575200  | -3.63374500 |
| H | 3.26243300 | 5.45835400  | -3.20140300 |
| O | 1.64816700 | -1.05799600 | -2.06396600 |
| O | 2.85983800 | 1.19908900  | -1.90012300 |
| H | 1.67751400 | -0.83801900 | 2.43348000  |
| C | 2.60378100 | -1.23913900 | 2.00463100  |
| C | 3.12427000 | -2.39131900 | 2.88511900  |
| C | 3.63756700 | -0.11109100 | 1.97801800  |
| C | 4.03623200 | -1.85910700 | 4.01457700  |
| H | 2.27441800 | -2.93239800 | 3.31235500  |
| H | 3.69931600 | -3.07759100 | 2.25803100  |
| C | 3.69669800 | 0.58293200  | 3.34230000  |
| H | 4.59875200 | -0.58179900 | 1.76551900  |
| C | 3.60574100 | -0.46312000 | 4.48355900  |
| H | 4.02569000 | -2.55964900 | 4.85533900  |
| H | 5.06978900 | -1.82436000 | 3.65272400  |
| H | 2.87027200 | 1.29875900  | 3.43158500  |
| H | 4.63147200 | 1.14861200  | 3.41904600  |

|    |             |             |             |
|----|-------------|-------------|-------------|
| H  | 2.57286900  | -0.51743500 | 4.83972200  |
| H  | 4.21555200  | -0.13998100 | 5.33289900  |
| Co | 2.58802500  | -0.21562900 | -0.64555400 |
| H  | 0.13339600  | -0.01301800 | -0.64763500 |
| O  | -1.10799100 | -0.37426600 | -1.31143100 |
| C  | -1.17345100 | 0.33555200  | -2.53297000 |
| C  | -0.18275800 | 1.42825500  | -2.27964100 |
| H  | -2.17289600 | 0.73181500  | -2.73459200 |
| H  | -0.84857500 | -0.31085600 | -3.35469200 |
| H  | 0.86098100  | 1.23906200  | -2.53999000 |
| C  | -0.57112300 | 2.70603000  | -1.71188800 |
| H  | -1.26272600 | 2.52791500  | -0.86990800 |
| H  | -1.22305000 | 3.19830900  | -2.45707200 |
| H  | 0.27441400  | 3.34220000  | -1.45761400 |
| O  | 0.87187000  | 0.59919800  | -0.26230100 |
| H  | 0.47975800  | 0.82764400  | 0.60671200  |
| N  | -1.91600000 | -2.07658900 | 0.47289000  |
| N  | -3.65973000 | -1.07082400 | -1.16654700 |
| C  | -1.35316800 | -2.43818900 | 1.57085800  |
| H  | -1.17213900 | -3.50039400 | 1.73747800  |
| C  | -4.53648100 | -0.42995600 | -1.86054700 |
| H  | -5.22858500 | -1.01027000 | -2.47100900 |
| C  | -0.93768600 | -1.55264100 | 2.62625100  |
| C  | -0.52327500 | -2.12084900 | 3.84860600  |
| C  | -0.89974400 | -0.13570800 | 2.45281400  |
| C  | -0.09568700 | -1.33466500 | 4.90399400  |
| H  | -0.55994100 | -3.20230400 | 3.95553500  |
| C  | -0.44490300 | 0.64716400  | 3.54129400  |
| C  | -0.06193800 | 0.06089200  | 4.73700300  |
| H  | 0.20300800  | -1.78525000 | 5.84380600  |
| H  | -0.42576000 | 1.72412600  | 3.40916400  |
| H  | 0.26524200  | 0.69238400  | 5.55830200  |
| C  | -4.69500200 | 0.99524200  | -1.92295200 |
| C  | -5.68724000 | 1.51571200  | -2.78360200 |
| C  | -3.88143500 | 1.88531300  | -1.15494600 |
| C  | -5.88488200 | 2.87550300  | -2.92152800 |
| H  | -6.30275300 | 0.81470300  | -3.34219700 |
| C  | -4.09586700 | 3.27808000  | -1.32616500 |
| C  | -5.06918800 | 3.75403500  | -2.18477200 |
| H  | -6.65178000 | 3.25964300  | -3.58490600 |
| H  | -3.49477700 | 3.95334400  | -0.72774100 |
| H  | -5.21188100 | 4.82695200  | -2.28178400 |
| O  | -1.18786600 | 0.46505000  | 1.32128300  |
| O  | -2.94634500 | 1.49728000  | -0.33171900 |
| H  | -1.55416700 | -2.89200900 | -1.37394600 |
| C  | -2.30459400 | -3.01196500 | -0.58428800 |
| C  | -2.40526200 | -4.48642900 | -0.17027000 |
| C  | -3.65991400 | -2.53989400 | -1.12332700 |
| C  | -3.25995100 | -5.29422000 | -1.18073100 |
| H  | -1.40030900 | -4.90938200 | -0.10390700 |
| H  | -2.86368900 | -4.55010500 | 0.82279800  |
| C  | -3.95678000 | -3.22263800 | -2.47414000 |
| H  | -4.42657700 | -2.80010400 | -0.38387400 |
| C  | -3.30193400 | -4.61912000 | -2.55614000 |
| H  | -2.86541600 | -6.31099900 | -1.26806600 |
| H  | -4.28349600 | -5.38983600 | -0.80010700 |
| H  | -3.57807800 | -2.59143400 | -3.28633500 |
| H  | -5.03988800 | -3.30938000 | -2.60806200 |
| H  | -2.27996300 | -4.52514500 | -2.93746800 |
| H  | -3.84831300 | -5.24142800 | -3.27176400 |
| Co | -2.45670800 | -0.29076100 | 0.07019500  |
| S  | -5.16956500 | -0.47708100 | 1.73235800  |
| O  | -5.45702300 | -0.84005300 | 3.12432300  |
| O  | -3.62871000 | -0.43582800 | 1.57801200  |
| O  | -5.83471600 | -1.26862600 | 0.67558100  |
| C  | -5.65155400 | 1.22534200  | 1.48250900  |
| C  | -6.76902600 | 1.52139000  | 0.70638100  |
| C  | -4.91253000 | 2.24006800  | 2.09026700  |
| C  | -7.14710900 | 2.85081900  | 0.53361700  |

|   |             |             |             |
|---|-------------|-------------|-------------|
| H | -7.31752000 | 0.71317500  | 0.23730800  |
| C | -5.30129800 | 3.56325300  | 1.90721800  |
| H | -4.03249100 | 1.98840400  | 2.67062500  |
| C | -6.41775400 | 3.88846600  | 1.12432300  |
| H | -8.00979000 | 3.08689100  | -0.08303100 |
| H | -4.72463800 | 4.36010100  | 2.36987600  |
| C | -6.79128900 | 5.32698400  | 0.87384800  |
| H | -6.33697100 | 5.68631100  | -0.05849400 |
| H | -7.87383500 | 5.44971700  | 0.77438000  |
| H | -6.44548600 | 5.97974900  | 1.68038700  |
| S | 5.52765600  | -1.39408500 | -0.75636300 |
| O | 4.11984600  | -1.11302200 | -1.33564500 |
| O | 5.47528000  | -2.04142000 | 0.57438800  |
| O | 6.31621500  | -2.05799100 | -1.79664500 |
| C | 6.18892300  | 0.25241100  | -0.50377700 |
| C | 6.06637700  | 1.18799900  | -1.53394800 |
| C | 6.78158400  | 0.60122300  | 0.70602600  |
| C | 6.50623400  | 2.48948400  | -1.32762900 |
| H | 5.58232700  | 0.90285100  | -2.46039600 |
| C | 7.21168800  | 1.91548900  | 0.90206000  |
| H | 6.88620200  | -0.14695500 | 1.48374300  |
| C | 7.07106000  | 2.87810600  | -0.10365600 |
| H | 6.37345800  | 3.22859300  | -2.11256000 |
| H | 7.66208200  | 2.19617900  | 1.85071700  |
| C | 7.49021700  | 4.30981900  | 0.11473200  |
| H | 7.86769000  | 4.46835900  | 1.12849000  |
| H | 8.27833700  | 4.60490100  | -0.58706800 |
| H | 6.64422900  | 4.98723100  | -0.04657300 |

#### IV-m (PO-Co<sup>III</sup>-OTs + H<sub>2</sub>O-Co<sup>III</sup>-OTs)

PO-Co<sup>III</sup>-OTs + H<sub>2</sub>O-Co<sup>III</sup>-OTs = PG + 2Co<sup>III</sup>(salen)-OTs

Charge: 0

Spin Multiplicity: 1

Sum of electronic and thermal Free Energies (a.u.): -4417.191770

Thermal correction to Gibbs Free Energy (a.u.): 1.015944

No imaginary frequency

Calculation of single point energy based on the optimized structure, Er = -6895.1180819 a.u.

|   |             |             |             |
|---|-------------|-------------|-------------|
| N | -2.48927600 | 1.71286300  | 0.63224900  |
| N | -3.48469300 | -0.66169700 | 0.87499500  |
| C | -2.18417800 | 2.91483500  | 0.28064700  |
| H | -2.18775800 | 3.69107900  | 1.04638700  |
| C | -3.63578500 | -1.94397700 | 0.91038500  |
| H | -3.98032100 | -2.39442500 | 1.84061200  |
| C | -1.81844300 | 3.33971700  | -1.04203700 |
| C | -1.61250700 | 4.72006200  | -1.26526800 |
| C | -1.60204000 | 2.40907800  | -2.10710300 |
| C | -1.21752900 | 5.20395600  | -2.49860500 |
| H | -1.77901400 | 5.40689700  | -0.43879600 |
| C | -1.19755000 | 2.93202800  | -3.36297400 |
| C | -1.01677100 | 4.29045600  | -3.55135400 |
| H | -1.07448300 | 6.26719500  | -2.65560900 |
| H | -1.05487800 | 2.22338200  | -4.17186700 |
| H | -0.71915400 | 4.65660300  | -4.53021500 |
| C | -3.40812200 | -2.84985500 | -0.17328500 |
| C | -3.56449200 | -4.23217400 | 0.07692100  |
| C | -3.10674800 | -2.39042700 | -1.49666400 |
| C | -3.42684900 | -5.17224800 | -0.92483600 |
| H | -3.80448300 | -4.54621200 | 1.09022700  |
| C | -2.98487500 | -3.38204100 | -2.51223200 |
| C | -3.13887300 | -4.72596500 | -2.23119400 |
| H | -3.54429400 | -6.22972000 | -0.71516100 |
| H | -2.77712400 | -3.03425500 | -3.51907000 |
| H | -3.03813200 | -5.45109000 | -3.03466500 |
| O | -1.70472400 | 1.11599200  | -1.97521000 |
| O | -2.96038500 | -1.14699900 | -1.83158100 |
| H | -1.83982100 | 0.98306100  | 2.44702200  |
| C | -2.78180600 | 1.35447900  | 2.02681000  |
| C | -3.32671700 | 2.49620800  | 2.90280200  |
| C | -3.78107000 | 0.19181400  | 2.02721700  |
| C | -4.15471300 | 1.93885400  | 4.08496800  |

|    |             |             |             |
|----|-------------|-------------|-------------|
| H  | -2.49173000 | 3.09545100  | 3.27817900  |
| H  | -3.96740100 | 3.13249400  | 2.28680100  |
| C  | -3.77983800 | -0.49108900 | 3.40049000  |
| H  | -4.76224600 | 0.62756700  | 1.83218000  |
| C  | -3.65021800 | 0.56077500  | 4.53118700  |
| H  | -4.12337200 | 2.64370500  | 4.92162800  |
| H  | -5.20543600 | 1.86291500  | 3.78330800  |
| H  | -2.94407700 | -1.19871100 | 3.46107100  |
| H  | -4.70490300 | -1.06548300 | 3.51928100  |
| H  | -2.59859100 | 0.64900300  | 4.82214600  |
| H  | -4.19371400 | 0.22147500  | 5.41848900  |
| Co | -2.72263100 | 0.27957700  | -0.59679100 |
| H  | -0.49373200 | -0.17813900 | -0.93006200 |
| O  | 1.28209900  | -1.19116600 | -1.40826400 |
| C  | 1.77264800  | -2.18437700 | -2.34745400 |
| C  | 0.51104900  | -2.44200100 | -1.64240000 |
| H  | 2.66929800  | -2.69756600 | -2.01809400 |
| H  | 1.76882500  | -1.83549700 | -3.37681200 |
| H  | -0.40770900 | -2.19830900 | -2.16819700 |
| C  | 0.37645000  | -3.43140500 | -0.52616100 |
| H  | 1.31422000  | -3.54755500 | 0.01655000  |
| H  | 0.06177700  | -4.38802700 | -0.95718000 |
| H  | -0.40488500 | -3.10449900 | 0.16064700  |
| O  | -1.01950400 | -0.56610900 | -0.21172000 |
| H  | -0.39782500 | -0.65052200 | 0.56283300  |
| N  | 1.64921000  | 1.27552100  | -0.14888700 |
| N  | 3.64888100  | 0.01786000  | -1.20893300 |
| C  | 1.08802700  | 1.97850000  | 0.77145100  |
| H  | 0.84473900  | 3.01792500  | 0.55970400  |
| C  | 4.69533700  | -0.67346800 | -1.52782100 |
| H  | 5.35960400  | -0.26865100 | -2.29301000 |
| C  | 0.76382600  | 1.48220300  | 2.08446100  |
| C  | 0.42774700  | 2.40027300  | 3.09623100  |
| C  | 0.75975900  | 0.08476800  | 2.36154600  |
| C  | 0.10772300  | 1.96780500  | 4.37345800  |
| H  | 0.44328300  | 3.46182300  | 2.86402400  |
| C  | 0.40993600  | -0.33707100 | 3.65679700  |
| C  | 0.10178100  | 0.59069000  | 4.64442000  |
| H  | -0.12807600 | 2.68258700  | 5.15389100  |
| H  | 0.41200000  | -1.40238900 | 3.85933100  |
| H  | -0.14067400 | 0.24173800  | 5.64403900  |
| C  | 5.07763500  | -1.92994900 | -0.96574200 |
| C  | 6.28463900  | -2.51849300 | -1.41156300 |
| C  | 4.28000500  | -2.59540000 | 0.02245500  |
| C  | 6.72921700  | -3.72288500 | -0.90870700 |
| H  | 6.87019600  | -1.98680500 | -2.15684500 |
| C  | 4.77350200  | -3.82596700 | 0.53541400  |
| C  | 5.95896900  | -4.36868000 | 0.08045700  |
| H  | 7.65420900  | -4.16463800 | -1.26267000 |
| H  | 4.17700500  | -4.32121300 | 1.29400700  |
| H  | 6.30231000  | -5.31311100 | 0.49401000  |
| O  | 0.98561800  | -0.82258800 | 1.41519600  |
| O  | 3.12373800  | -2.17174800 | 0.44347300  |
| H  | 1.27213500  | 1.30915300  | -2.15870600 |
| C  | 1.97819400  | 1.79518300  | -1.47422500 |
| C  | 1.91209900  | 3.31368400  | -1.65477400 |
| C  | 3.39772900  | 1.33073100  | -1.82845100 |
| C  | 2.61576200  | 3.72541400  | -2.97660400 |
| H  | 0.87451800  | 3.64590500  | -1.66130400 |
| H  | 2.41940800  | 3.78338400  | -0.80652400 |
| C  | 3.57219500  | 1.38609000  | -3.35792500 |
| H  | 4.08292700  | 2.02839500  | -1.34061500 |
| C  | 2.74350600  | 2.55000700  | -3.95759800 |
| H  | 2.05832100  | 4.54109700  | -3.44530700 |
| H  | 3.61619800  | 4.11528100  | -2.75550700 |
| H  | 3.25224800  | 0.43314400  | -3.79579200 |
| H  | 4.63149000  | 1.51399600  | -3.60481100 |
| H  | 1.73908900  | 2.19495500  | -4.21294200 |
| H  | 3.20008900  | 2.88337500  | -4.89458000 |

|    |             |             |             |
|----|-------------|-------------|-------------|
| Co | 2.40137700  | -0.45566500 | 0.14902300  |
| S  | 4.41737600  | 1.33079800  | 1.76261400  |
| O  | 4.52101600  | 1.62946200  | 3.19250700  |
| O  | 3.40115000  | 0.15968000  | 1.61623700  |
| O  | 4.14299600  | 2.45201800  | 0.84099400  |
| C  | 5.95035500  | 0.58028700  | 1.23500900  |
| C  | 6.72880500  | 1.18609000  | 0.25499200  |
| C  | 6.34670200  | -0.62346000 | 1.82385600  |
| C  | 7.91404000  | 0.56886800  | -0.15159900 |
| H  | 6.40460800  | 2.12657200  | -0.17620300 |
| C  | 7.53145800  | -1.22031300 | 1.41495300  |
| H  | 5.71868700  | -1.08752100 | 2.57559800  |
| C  | 8.33058900  | -0.63776200 | 0.41869200  |
| H  | 8.52530100  | 1.03554700  | -0.91959300 |
| H  | 7.83207600  | -2.16703900 | 1.85356700  |
| C  | 9.59386400  | -1.32319000 | -0.03402400 |
| H  | 9.36624500  | -2.30974000 | -0.45338000 |
| H  | 10.11676600 | -0.74095200 | -0.79722500 |
| H  | 10.28338800 | -1.47962700 | 0.80255100  |
| S  | -5.65785200 | 1.41534000  | -0.76493100 |
| O  | -4.24440900 | 1.14674800  | -1.33785800 |
| O  | -5.61549600 | 2.08698600  | 0.55402500  |
| O  | -6.45615000 | 2.04943300  | -1.81675500 |
| C  | -6.28694400 | -0.23817900 | -0.48021100 |
| C  | -6.11021900 | -1.20150600 | -1.47606000 |
| C  | -6.89629200 | -0.56652800 | 0.72705800  |
| C  | -6.50686700 | -2.51060300 | -1.23406700 |
| H  | -5.61006000 | -0.93171000 | -2.39825200 |
| C  | -7.28389700 | -1.88808900 | 0.95871000  |
| H  | -7.04167000 | 0.20228600  | 1.47765300  |
| C  | -7.08260100 | -2.87866700 | -0.00890600 |
| H  | -6.32741900 | -3.27063900 | -1.98922100 |
| H  | -7.74452400 | -2.15344100 | 1.90691100  |
| C  | -7.44169900 | -4.31926600 | 0.25364300  |
| H  | -7.85201300 | -4.45534200 | 1.25791300  |
| H  | -8.18444000 | -4.68238700 | -0.46549300 |
| H  | -6.55738300 | -4.95905000 | 0.15450100  |

**IV-m (PO-Co<sup>III</sup>-OTs + H<sub>2</sub>O-Co<sup>III</sup>-OTs)**

PO-Co<sup>III</sup>-OTs + H<sub>2</sub>O-Co<sup>III</sup>-OTs = PG + 2Co<sup>III</sup>(salen)-OTs

Charge: 0

Spin Multiplicity: 1

Sum of electronic and thermal Free Energies (a.u.): -4417.244182

Thermal correction to Gibbs Free Energy (a.u.): 1.020760

No imaginary frequency

Calculation of single point energy based on the optimized structure, E<sub>p</sub> = -6895.1710249 a.u.

|   |            |             |             |
|---|------------|-------------|-------------|
| N | 2.11847600 | -1.20720200 | 1.36468500  |
| N | 3.42918600 | 1.00701900  | 1.05739100  |
| C | 1.84002200 | -2.45626800 | 1.24637500  |
| H | 1.83995200 | -3.08105700 | 2.13783200  |
| C | 4.05001200 | 2.09028400  | 0.72576500  |
| H | 4.63664400 | 2.59733600  | 1.49281700  |
| C | 1.53013700 | -3.10909100 | -0.00203600 |
| C | 1.50810600 | -4.51551300 | -0.03613100 |
| C | 1.21767400 | -2.36742800 | -1.17686300 |
| C | 1.22506000 | -5.20179400 | -1.20674500 |
| H | 1.73492000 | -5.06021700 | 0.87639500  |
| C | 0.95423100 | -3.08086400 | -2.36207000 |
| C | 0.96262300 | -4.46934100 | -2.37504100 |
| H | 1.23153200 | -6.28594500 | -1.22589600 |
| H | 0.76984600 | -2.50875400 | -3.26498300 |
| H | 0.77218600 | -4.99362300 | -3.30739800 |
| C | 4.06586300 | 2.69313800  | -0.57059500 |
| C | 4.85998100 | 3.84823500  | -0.75495700 |
| C | 3.33178100 | 2.14761200  | -1.67255500 |
| C | 4.96005200 | 4.46911800  | -1.98276800 |
| H | 5.41165500 | 4.23329300  | 0.09881300  |
| C | 3.46332800 | 2.80114400  | -2.92858500 |
| C | 4.25308000 | 3.92470400  | -3.07436200 |
| H | 5.57059100 | 5.35666800  | -2.10811600 |



|    |             |             |             |
|----|-------------|-------------|-------------|
| H  | 2.91818400  | 2.37906500  | -3.76622100 |
| H  | 4.32797000  | 4.39717200  | -4.05018800 |
| O  | 1.12752100  | -1.04829800 | -1.17922600 |
| O  | 2.53384200  | 1.12394500  | -1.59234200 |
| H  | 1.50387300  | 0.00473500  | 2.89206500  |
| C  | 2.41196400  | -0.55571700 | 2.63972700  |
| C  | 2.79138800  | -1.47362200 | 3.80667000  |
| C  | 3.54374300  | 0.45579200  | 2.41496900  |
| C  | 3.48186300  | -0.65630700 | 4.93035300  |
| H  | 1.89443500  | -1.96892100 | 4.18700500  |
| H  | 3.47640600  | -2.24264700 | 3.43743800  |
| C  | 3.52629300  | 1.49008300  | 3.55464800  |
| H  | 4.47669500  | -0.11285000 | 2.42865200  |
| C  | 3.08781200  | 0.82750800  | 4.88432200  |
| H  | 3.23455300  | -1.08345500 | 5.90689700  |
| H  | 4.56987400  | -0.73785800 | 4.82551600  |
| H  | 2.84006100  | 2.30425200  | 3.29475600  |
| H  | 4.52294600  | 1.92893900  | 3.67012500  |
| H  | 2.00048200  | 0.91265200  | 4.99710100  |
| H  | 3.52617900  | 1.36637200  | 5.72983000  |
| Co | 2.33901000  | -0.02583200 | -0.10656300 |
| H  | -0.20748300 | -0.22364900 | -1.31278100 |
| O  | -0.98567900 | 0.41803100  | -1.33587300 |
| C  | -0.46630000 | 1.76004300  | -1.37556000 |
| C  | 0.29506000  | 2.18788900  | -0.09297900 |
| H  | -1.30615900 | 2.42520600  | -1.57109800 |
| H  | 0.22893800  | 1.78448400  | -2.21648500 |
| H  | 1.17255500  | 2.74942100  | -0.41287400 |
| C  | -0.48453600 | 3.02236100  | 0.91360200  |
| H  | -1.31981600 | 2.45877900  | 1.32738200  |
| H  | -0.88386500 | 3.91520700  | 0.42210900  |
| H  | 0.18784900  | 3.34132900  | 1.71599800  |
| O  | 0.81018800  | 1.02298000  | 0.58689000  |
| H  | 0.01417400  | 0.47276700  | 0.88042800  |
| N  | -2.03770400 | -2.04024600 | -0.64654400 |
| N  | -3.54349500 | -0.29489200 | -1.84230200 |
| C  | -1.62557400 | -2.88655100 | 0.23113500  |
| H  | -1.48640800 | -3.92484300 | -0.06646400 |
| C  | -4.22789500 | 0.68454300  | -2.32869500 |
| H  | -4.79428700 | 0.50601200  | -3.24288900 |
| C  | -1.33546700 | -2.58125600 | 1.60989900  |
| C  | -1.10695400 | -3.65184200 | 2.49518600  |
| C  | -1.23958000 | -1.24311600 | 2.08162700  |
| C  | -0.81406300 | -3.43159700 | 3.83156600  |
| H  | -1.16870800 | -4.66575300 | 2.10893800  |
| C  | -0.94756700 | -1.03646900 | 3.44521500  |
| C  | -0.74423300 | -2.11010300 | 4.30128300  |
| H  | -0.65707500 | -4.26543700 | 4.50680800  |
| H  | -0.90347200 | -0.01241700 | 3.80097800  |
| H  | -0.53467700 | -1.92217600 | 5.35066300  |
| C  | -4.33296200 | 2.00190300  | -1.77909500 |
| C  | -5.10069800 | 2.96034400  | -2.47992500 |
| C  | -3.71413000 | 2.35177300  | -0.53969800 |
| C  | -5.25648500 | 4.24646100  | -2.00520200 |
| H  | -5.57364600 | 2.65978800  | -3.41193000 |
| C  | -3.88669400 | 3.68335200  | -0.07604100 |
| C  | -4.63062000 | 4.59936800  | -0.79348200 |
| H  | -5.84536800 | 4.97299300  | -2.55413700 |
| H  | -3.43232600 | 3.94490600  | 0.87160500  |
| H  | -4.74017500 | 5.60994100  | -0.40896300 |
| O  | -1.35452000 | -0.19417300 | 1.28477300  |
| O  | -3.00323300 | 1.53276300  | 0.18067800  |
| H  | -1.51236200 | -2.07168200 | -2.63399400 |
| C  | -2.35696200 | -2.41777300 | -2.02517600 |
| C  | -2.59705000 | -3.91453700 | -2.27277000 |
| C  | -3.60713100 | -1.63485900 | -2.43858200 |
| C  | -3.38606800 | -4.14406400 | -3.58672700 |
| H  | -1.63739200 | -4.43537100 | -2.30436800 |
| H  | -3.16741100 | -4.32469600 | -1.43243500 |

|    |             |             |             |
|----|-------------|-------------|-------------|
| C  | -3.75732900 | -1.66244500 | -3.97227200 |
| H  | -4.47016000 | -2.11282200 | -1.96272000 |
| C  | -3.20324000 | -2.97825500 | -4.56491900 |
| H  | -3.07143700 | -5.08511200 | -4.04789700 |
| H  | -4.45316400 | -4.25118000 | -3.36067000 |
| H  | -3.22419700 | -0.80847800 | -4.40550200 |
| H  | -4.81449900 | -1.55437600 | -4.23538700 |
| H  | -2.13653800 | -2.86250900 | -4.79208200 |
| H  | -3.69805100 | -3.19268100 | -5.51704400 |
| Co | -2.52054400 | -0.22885900 | -0.24906500 |
| S  | -5.39745300 | -1.00402800 | 0.82737300  |
| O  | -5.83665800 | -1.86759400 | 1.92818200  |
| O  | -3.84390800 | -0.96709700 | 0.88844800  |
| O  | -5.91014100 | -1.30591300 | -0.52457600 |
| C  | -5.88683700 | 0.67152900  | 1.20040000  |
| C  | -6.81463700 | 1.31699400  | 0.38786200  |
| C  | -5.35186200 | 1.30520700  | 2.32177800  |
| C  | -7.20885200 | 2.61609000  | 0.70144100  |
| H  | -7.20899500 | 0.80037700  | -0.47887200 |
| C  | -5.75205100 | 2.60316600  | 2.61983600  |
| H  | -4.61943000 | 0.79026500  | 2.93271900  |
| C  | -6.68043000 | 3.27828100  | 1.81407800  |
| H  | -7.92252800 | 3.12841700  | 0.06269100  |
| H  | -5.33333900 | 3.10744500  | 3.48686000  |
| C  | -7.05688600 | 4.70775700  | 2.10602000  |
| H  | -6.41260800 | 5.39547600  | 1.54376000  |
| H  | -8.08969400 | 4.91906400  | 1.81385200  |
| H  | -6.94532800 | 4.94571600  | 3.16770800  |
| S  | 5.06216500  | -1.58832800 | -0.26572400 |
| O  | 3.70388600  | -1.11346500 | -0.84499700 |
| O  | 5.01357300  | -1.83012300 | 1.19229900  |
| O  | 5.54694600  | -2.67690000 | -1.11801000 |
| C  | 6.11410900  | -0.16556500 | -0.52723200 |
| C  | 6.16140800  | 0.40808200  | -1.80062200 |
| C  | 6.86416200  | 0.36086600  | 0.51870200  |
| C  | 6.96271500  | 1.52155600  | -2.01547600 |
| H  | 5.55577000  | -0.00541900 | -2.59878600 |
| C  | 7.65745500  | 1.48747700  | 0.28997900  |
| H  | 6.81995000  | -0.11007700 | 1.49437000  |
| C  | 7.71764900  | 2.08249200  | -0.97408000 |
| H  | 6.98149500  | 1.98493100  | -2.99731700 |
| H  | 8.24134400  | 1.90657800  | 1.10540200  |
| C  | 8.55170900  | 3.31306100  | -1.22206200 |
| H  | 9.07577000  | 3.63308300  | -0.31755400 |
| H  | 9.30164300  | 3.13513600  | -2.00062700 |
| H  | 7.92128000  | 4.14151500  | -1.56359100 |

five-coordinated Co<sup>III</sup>(salen)-Cl counterion addition in the terminal carbon and subsequent hydrolysis

**Co<sup>III</sup>(salen)-Cl counterion addition in the terminal carbon**

Co<sup>III</sup>(salen)-Cl + PO = Co<sup>III</sup>(salen)-PO~Cl

Charge: 0

Spin Multiplicity: 3

Sum of electronic and thermal Free Energies (a.u.): -1832.353456

Thermal correction to Gibbs Free Energy (a.u.): 0.394718

Imaginary frequencies: -388.14

Calculation of single point energy based on the optimized structure, Et = -3070.9923053 a.u.

|    |             |             |             |
|----|-------------|-------------|-------------|
| C  | 4.26190100  | -3.15968200 | -1.17145900 |
| C  | 5.05362400  | -2.04496000 | -0.83079400 |
| C  | 2.88537300  | -3.06171100 | -1.25552100 |
| H  | 4.73893200  | -4.11644000 | -1.36514500 |
| C  | 4.43639800  | -0.83381000 | -0.59197800 |
| H  | 6.13148400  | -2.13910400 | -0.75760900 |
| C  | 2.22754800  | -1.83529600 | -0.98737300 |
| H  | 2.26752500  | -3.91643600 | -1.50838000 |
| C  | 3.03171800  | -0.69876000 | -0.67598200 |
| H  | 5.02291500  | 0.04080900  | -0.32511500 |
| O  | 0.91852400  | -1.81152100 | -1.03011200 |
| C  | 2.45389100  | 0.59182400  | -0.46388000 |
| Co | -0.20633000 | -0.38818000 | -0.63757800 |

|    |             |             |             |
|----|-------------|-------------|-------------|
| N  | 1.19384600  | 0.88050500  | -0.57221200 |
| H  | 3.14566000  | 1.39198100  | -0.22030900 |
| N  | -1.36949600 | 1.13221000  | -0.75635200 |
| C  | 0.67926600  | 2.19373100  | -0.15234500 |
| C  | -2.64820500 | 1.08781500  | -0.55657400 |
| C  | -0.62748500 | 2.39495100  | -0.92458700 |
| C  | 1.62671600  | 3.38051600  | -0.31263100 |
| H  | -3.20104900 | 2.02627400  | -0.51281100 |
| C  | -3.41883400 | -0.10454400 | -0.39721600 |
| C  | -1.34168500 | 3.67356400  | -0.48962000 |
| C  | 0.91281300  | 4.67223100  | 0.11143000  |
| H  | 1.96175700  | 3.45307300  | -1.35673000 |
| H  | 2.50464600  | 3.23389900  | 0.32126500  |
| C  | -4.79586800 | 0.01308900  | -0.09235300 |
| C  | -2.84522700 | -1.39875700 | -0.60485200 |
| C  | -0.40034000 | 4.87730400  | -0.65178800 |
| H  | -2.24944200 | 3.83330100  | -1.08185500 |
| H  | -1.64475100 | 3.57508600  | 0.56079900  |
| H  | 1.57728000  | 5.52897400  | -0.04133600 |
| H  | 0.70566800  | 4.62134000  | 1.18771200  |
| C  | -5.60216200 | -1.09954000 | 0.02396200  |
| H  | -5.20952100 | 1.00757500  | 0.05586100  |
| C  | -3.70254700 | -2.52494600 | -0.50186800 |
| O  | -1.58975900 | -1.60371200 | -0.90062900 |
| H  | -0.18480400 | 5.02331700  | -1.71896600 |
| H  | -0.90560100 | 5.78568500  | -0.30731500 |
| C  | -5.03927500 | -2.37519200 | -0.18760700 |
| H  | -6.65338100 | -0.99741700 | 0.26978900  |
| H  | -3.26228200 | -3.50195400 | -0.66811100 |
| H  | -5.66688400 | -3.25778800 | -0.10144100 |
| Cl | 2.26474800  | 1.03037000  | 2.56698000  |
| C  | -0.26964500 | -1.65101900 | 1.95895800  |
| C  | 1.05835300  | -1.30115900 | 2.48750600  |
| O  | -0.31809800 | -0.38383200 | 1.32388400  |
| H  | -0.24199400 | -2.47534000 | 1.23451400  |
| H  | 1.94511200  | -1.51955100 | 1.90906300  |
| H  | 1.19683500  | -0.99903000 | 3.51526900  |
| C  | -1.39920100 | -1.83515800 | 2.95481000  |
| H  | -2.35172500 | -1.86869400 | 2.41748300  |
| H  | -1.28270300 | -2.77067700 | 3.51376000  |
| H  | -1.42413600 | -0.99843200 | 3.65904500  |
| H  | -0.37875100 | 2.47180700  | -1.99374700 |
| H  | 0.45086600  | 2.07287700  | 0.91563400  |

**Co<sup>III</sup>(salen)-Cl counterion addition in the terminal carbon**

Co<sup>III</sup>(salen)-Cl + PO = Co<sup>III</sup>(salen)-PO~Cl

Charge: 0

Spin Multiplicity: 3

Sum of electronic and thermal Free Energies (a.u.): -1832.394230

Thermal correction to Gibbs Free Energy (a.u.): 0.395350

No imaginary frequency

Calculation of single point energy based on the optimized structure, Er = -3071.0390873 a.u.

|    |             |             |             |
|----|-------------|-------------|-------------|
| C  | 3.91808200  | -3.57767200 | -1.01810500 |
| C  | 4.81992700  | -2.53219000 | -0.73858000 |
| C  | 2.55623000  | -3.34711200 | -1.08210500 |
| H  | 4.29516600  | -4.58396300 | -1.17730600 |
| C  | 4.33203900  | -1.25605900 | -0.54001000 |
| H  | 5.88405800  | -2.73053300 | -0.67244000 |
| C  | 2.03530200  | -2.04924700 | -0.86398000 |
| H  | 1.85091000  | -4.14550400 | -1.28541600 |
| C  | 2.94790300  | -0.98591900 | -0.61568200 |
| H  | 5.00095100  | -0.43700100 | -0.29548400 |
| O  | 0.72889600  | -1.89741100 | -0.89240700 |
| C  | 2.50172300  | 0.36013000  | -0.42738800 |
| Co | -0.24669900 | -0.34986700 | -0.66912800 |
| N  | 1.25801600  | 0.75936600  | -0.54079000 |
| H  | 3.26768200  | 1.10603600  | -0.26732700 |
| N  | -1.26027300 | 1.26758400  | -0.66809200 |
| C  | 0.90253400  | 2.13023200  | -0.12964500 |
| C  | -2.53032100 | 1.33123100  | -0.42278300 |

|    |             |             |             |
|----|-------------|-------------|-------------|
| C  | -0.41059500 | 2.45919100  | -0.84033900 |
| C  | 1.95232200  | 3.21397700  | -0.37264900 |
| H  | -2.98817400 | 2.31322100  | -0.30492200 |
| C  | -3.40478600 | 0.20488500  | -0.32110200 |
| C  | -0.98371700 | 3.79392500  | -0.36974400 |
| C  | 1.39395500  | 4.57147600  | 0.07951600  |
| H  | 2.22065000  | 3.24141200  | -1.43799300 |
| H  | 2.84174500  | 2.98334100  | 0.21761700  |
| C  | -4.75161000 | 0.41553400  | 0.05507500  |
| C  | -2.96464600 | -1.10854600 | -0.67736200 |
| C  | 0.05678100  | 4.90403100  | -0.59218700 |
| H  | -1.90435500 | 4.03735800  | -0.91193000 |
| H  | -1.23521100 | 3.72265100  | 0.69649300  |
| H  | 2.12591600  | 5.35835700  | -0.12928200 |
| H  | 1.26264900  | 4.54666800  | 1.16855600  |
| C  | -5.65272400 | -0.62837600 | 0.10058200  |
| H  | -5.06599300 | 1.42308400  | 0.31512100  |
| C  | -3.91831100 | -2.15768200 | -0.65370200 |
| O  | -1.73896000 | -1.39116100 | -1.03636200 |
| H  | 0.21144600  | 5.03477800  | -1.67180000 |
| H  | -0.33710500 | 5.85374900  | -0.21527700 |
| C  | -5.22273500 | -1.92102900 | -0.26288100 |
| H  | -6.67988300 | -0.45778000 | 0.40333300  |
| H  | -3.57872300 | -3.14748000 | -0.93819700 |
| H  | -5.92821600 | -2.74655800 | -0.23676400 |
| Cl | 2.98091500  | 1.07204700  | 2.25617200  |
| C  | -0.68600600 | -1.89427700 | 1.94507900  |
| C  | 0.40871200  | -1.01191700 | 2.36442700  |
| O  | -0.60347400 | -0.52829900 | 1.42270400  |
| H  | -0.45881100 | -2.62828200 | 1.17519900  |
| H  | 1.40817500  | -1.09593900 | 1.95266000  |
| H  | 0.36460700  | -0.49944100 | 3.32019500  |
| C  | -1.89634800 | -2.16022100 | 2.79318000  |
| H  | -2.78736800 | -2.25800600 | 2.16513700  |
| H  | -1.76492900 | -3.09514800 | 3.34820900  |
| H  | -2.05615800 | -1.34895600 | 3.50825000  |
| H  | -0.19750400 | 2.52578200  | -1.91769500 |
| H  | 0.73564100  | 2.06989700  | 0.95559700  |

**Co<sup>III</sup>(salen)-Cl counterion addition in the terminal carbon**

Co<sup>III</sup>(salen)-Cl + PO = Co<sup>III</sup>(salen)-PO~Cl

Charge: 0

Spin Multiplicity: 3

Sum of electronic and thermal Free Energies (a.u.): -1832.420730

Thermal correction to Gibbs Free Energy (a.u.): 0.396829

No imaginary frequency

Calculation of single point energy based on the optimized structure, Ep = -3071.0579565 a.u.

|    |             |             |             |
|----|-------------|-------------|-------------|
| C  | 4.69996700  | -1.51150100 | -2.01789800 |
| C  | 5.26291400  | -0.31351200 | -1.53535100 |
| C  | 3.34167100  | -1.75219800 | -1.93080900 |
| H  | 5.34439800  | -2.26260200 | -2.46646300 |
| C  | 4.43112900  | 0.63152000  | -0.97033800 |
| H  | 6.33047800  | -0.13786500 | -1.61006200 |
| C  | 2.46888000  | -0.80994500 | -1.33232300 |
| H  | 2.90352000  | -2.67357900 | -2.29844900 |
| C  | 3.04016000  | 0.40951300  | -0.85387100 |
| H  | 4.83920200  | 1.56806700  | -0.59731300 |
| O  | 1.19389000  | -1.09588200 | -1.26355700 |
| C  | 2.22459200  | 1.44671000  | -0.30299000 |
| Co | -0.13033900 | -0.18969400 | -0.27925800 |
| N  | 0.95414500  | 1.36255500  | -0.08529000 |
| H  | 2.72905600  | 2.38574900  | -0.07273400 |
| N  | -1.56929500 | 1.11217100  | -0.57612900 |
| C  | 0.13582900  | 2.45995900  | 0.43250100  |
| C  | -2.82322400 | 0.80218000  | -0.68943500 |
| C  | -1.10206700 | 2.50542900  | -0.48597500 |
| C  | 0.80103800  | 3.82907900  | 0.55022600  |
| H  | -3.55950700 | 1.60581100  | -0.75253100 |
| C  | -3.35409800 | -0.52211400 | -0.73395900 |
| C  | -2.11778100 | 3.53586900  | 0.01144000  |

|    |             |             |             |
|----|-------------|-------------|-------------|
| C  | -0.21763700 | 4.86103500  | 1.05569200  |
| H  | 1.18699700  | 4.13901300  | -0.43047700 |
| H  | 1.65356500  | 3.77805900  | 1.23563800  |
| C  | -4.76060900 | -0.66887800 | -0.84207600 |
| C  | -2.52024900 | -1.68913100 | -0.68332200 |
| C  | -1.45593800 | 4.91493900  | 0.15363300  |
| H  | -2.96579400 | 3.60919900  | -0.67723700 |
| H  | -2.51308500 | 3.20511300  | 0.98081500  |
| H  | 0.25234200  | 5.84819700  | 1.11458100  |
| H  | -0.52189200 | 4.59523500  | 2.07642600  |
| C  | -5.35636300 | -1.90891000 | -0.89956500 |
| H  | -5.36918200 | 0.23183100  | -0.87822200 |
| C  | -3.16570600 | -2.95565900 | -0.74919500 |
| O  | -1.22346000 | -1.67471900 | -0.59694300 |
| H  | -1.16395200 | 5.27814500  | -0.84092700 |
| H  | -2.18288500 | 5.63281600  | 0.54750000  |
| C  | -4.53698200 | -3.05780300 | -0.85268500 |
| H  | -6.43367000 | -2.00407200 | -0.97879300 |
| H  | -2.53093800 | -3.83439200 | -0.71535800 |
| H  | -4.99391400 | -4.04268800 | -0.89737100 |
| Cl | 2.58333400  | -1.98595500 | 2.10646500  |
| C  | -0.19407000 | -1.62553200 | 2.16313500  |
| C  | 0.90835000  | -2.58906500 | 1.71288300  |
| O  | -0.06844800 | -0.37011200 | 1.55728100  |
| H  | -1.12504200 | -2.12641400 | 1.84227300  |
| H  | 0.88559500  | -2.71032900 | 0.63079500  |
| H  | 0.80705500  | -3.55892800 | 2.20410600  |
| C  | -0.23808300 | -1.43147800 | 3.67896500  |
| H  | -1.07257700 | -0.77448700 | 3.93910300  |
| H  | -0.37249700 | -2.38839900 | 4.19572400  |
| H  | 0.68988500  | -0.97054500 | 4.02617800  |
| H  | -0.75218300 | 2.80015100  | -1.48718800 |
| H  | -0.20265500 | 2.12948800  | 1.42363400  |

**subsequent hydrolysis (H<sub>2</sub>O molecule is opposite the counterion Cl<sup>-</sup>)**

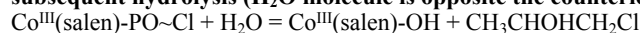

Charge: 0

Spin Multiplicity: 3

Sum of electronic and thermal Free Energies (a.u.): -1908.820217

Thermal correction to Gibbs Free Energy (a.u.): 0.417955

Imaginary frequencies: -629.24

Calculation of single point energy based on the optimized structure, Et = -3147.5089379 a.u.

|    |             |             |             |
|----|-------------|-------------|-------------|
| C  | 2.04318000  | -4.75478500 | -0.85510300 |
| C  | 2.73998600  | -4.15922700 | -1.92579600 |
| C  | 1.23459100  | -4.00775500 | -0.02050100 |
| H  | 2.14258500  | -5.82257700 | -0.68000500 |
| C  | 2.60531400  | -2.80220400 | -2.13122200 |
| H  | 3.37314100  | -4.75746700 | -2.57162400 |
| C  | 1.06713200  | -2.61112700 | -0.20993300 |
| H  | 0.70248600  | -4.46231400 | 0.80800900  |
| C  | 1.77293000  | -2.00773100 | -1.30783100 |
| H  | 3.14119200  | -2.31557900 | -2.94264300 |
| O  | 0.33954300  | -1.95272600 | 0.65307000  |
| C  | 1.73443900  | -0.59229700 | -1.53813800 |
| Co | -0.51629600 | -0.32859300 | 0.23019900  |
| N  | 0.89664000  | 0.21153300  | -0.97370900 |
| H  | 2.48717100  | -0.17884600 | -2.21231100 |
| N  | -1.33423300 | 1.29871600  | -0.36106600 |
| C  | 0.98402100  | 1.67198600  | -0.97186600 |
| C  | -2.61682300 | 1.48217800  | -0.38128200 |
| C  | -0.44347100 | 2.20423000  | -1.11575900 |
| C  | 1.92074800  | 2.36145600  | -1.95497000 |
| H  | -2.98952700 | 2.45049500  | -0.72639000 |
| C  | -3.59699700 | 0.48172900  | -0.09840400 |
| C  | -0.47083600 | 3.68028300  | -0.71498000 |
| C  | 1.90698100  | 3.86954900  | -1.64183700 |
| H  | 1.59968500  | 2.17667800  | -2.98948100 |
| H  | 2.93874900  | 1.97681700  | -1.84360400 |
| C  | -4.94877000 | 0.85941900  | 0.06338200  |
| C  | -3.24388000 | -0.90784300 | -0.16468100 |

|    |             |             |             |
|----|-------------|-------------|-------------|
| C  | 0.48697800  | 4.45908600  | -1.63478600 |
| H  | -1.48229700 | 4.09308400  | -0.79381400 |
| H  | -0.16257100 | 3.76309100  | 0.33356100  |
| H  | 2.53007100  | 4.40715900  | -2.36423800 |
| H  | 2.36521500  | 4.01723200  | -0.65619000 |
| C  | -5.94471200 | -0.08716700 | 0.19349400  |
| H  | -5.19216700 | 1.91875700  | 0.09151500  |
| C  | -4.29469400 | -1.85597000 | -0.06370000 |
| O  | -2.02449600 | -1.33379900 | -0.34949000 |
| H  | 0.08417600  | 4.44322100  | -2.65684100 |
| H  | 0.52093500  | 5.51020800  | -1.32955300 |
| C  | -5.60312000 | -1.45341700 | 0.12274900  |
| H  | -6.97701600 | 0.21314200  | 0.33664000  |
| H  | -4.02548800 | -2.90484300 | -0.12532200 |
| H  | -6.38326400 | -2.20430000 | 0.21320500  |
| H  | -0.73487500 | 2.11952900  | -2.17343900 |
| H  | 1.30868700  | 1.90415000  | 0.04846800  |
| O  | -1.40792600 | -0.20274400 | 2.09661100  |
| H  | -1.29542100 | -1.08921900 | 2.46695200  |
| H  | -0.43179600 | 0.36708000  | 2.23933000  |
| Cl | 3.78991600  | 1.26053900  | 1.02510100  |
| C  | 1.70406300  | 0.18339400  | 2.58690600  |
| C  | 2.94061800  | -0.18217800 | 1.76915000  |
| O  | 0.70078500  | 0.79095500  | 1.82563700  |
| H  | 1.36441600  | -0.80790900 | 2.95303900  |
| H  | 2.67843500  | -0.82854400 | 0.93739600  |
| H  | 3.69091100  | -0.67035500 | 2.39315000  |
| C  | 2.04033600  | 1.05360800  | 3.80088000  |
| H  | 1.13894100  | 1.21347500  | 4.39884300  |
| H  | 2.80186900  | 0.58617200  | 4.43582800  |
| H  | 2.40899800  | 2.02796200  | 3.46958900  |

**subsequent hydrolysis (H<sub>2</sub>O molecule is opposite the counterion Cl)**

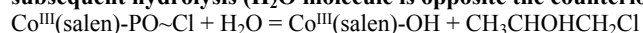

Charge: 0

Spin Multiplicity: 3

Sum of electronic and thermal Free Energies (a.u.): -1908.848419

Thermal correction to Gibbs Free Energy (a.u.): 0.418909

No imaginary frequency

Calculation of single point energy based on the optimized structure, Er = -3147.544214 a.u.

|    |             |             |             |
|----|-------------|-------------|-------------|
| C  | 4.82442400  | -2.48836200 | -1.26193200 |
| C  | 5.46489800  | -1.27287800 | -0.93945600 |
| C  | 3.44857300  | -2.57837400 | -1.32770200 |
| H  | 5.42442600  | -3.37206100 | -1.46096400 |
| C  | 4.69234900  | -0.15923400 | -0.69064100 |
| H  | 6.54679200  | -1.21861700 | -0.88937900 |
| C  | 2.62660400  | -1.45074300 | -1.06047600 |
| H  | 2.94958800  | -3.50913800 | -1.57435700 |
| C  | 3.27791100  | -0.21588500 | -0.74562700 |
| H  | 5.16179800  | 0.78985000  | -0.44329500 |
| O  | 1.33356900  | -1.60126300 | -1.11833900 |
| C  | 2.53772200  | 0.97877000  | -0.49581600 |
| Co | 0.00131300  | -0.32298900 | -0.79940300 |
| N  | 1.24708200  | 1.09646200  | -0.52450000 |
| H  | 3.12874500  | 1.86281400  | -0.25668400 |
| N  | -1.30124200 | 1.08362800  | -0.94613700 |
| C  | 0.55929600  | 2.33363500  | -0.11713700 |
| C  | -2.56838400 | 0.87751100  | -0.79235700 |
| C  | -0.70100800 | 2.42540900  | -0.99013200 |
| C  | 1.36877400  | 3.62795000  | -0.16878200 |
| H  | -3.23096500 | 1.73551800  | -0.68732100 |
| C  | -3.18676100 | -0.41225000 | -0.76543500 |
| C  | -1.59018400 | 3.58367400  | -0.53886700 |
| C  | 0.48229700  | 4.80666800  | 0.26363900  |
| H  | 1.74808300  | 3.79040800  | -1.18733500 |
| H  | 2.23591000  | 3.56747400  | 0.49705200  |
| C  | -4.56627600 | -0.49677400 | -0.46832900 |
| C  | -2.46236600 | -1.59331800 | -1.12157200 |
| C  | -0.79402300 | 4.89648900  | -0.58003300 |
| H  | -2.47000600 | 3.66845300  | -1.18622000 |

|    |             |             |             |
|----|-------------|-------------|-------------|
| H  | -1.93041900 | 3.37334200  | 0.48180200  |
| H  | 1.05103500  | 5.74007700  | 0.19588700  |
| H  | 0.20802000  | 4.67504400  | 1.31765300  |
| C  | -5.23475300 | -1.70366100 | -0.50307200 |
| H  | -5.09355300 | 0.41500500  | -0.19952600 |
| C  | -3.18077500 | -2.81359400 | -1.18493200 |
| O  | -1.18598500 | -1.61036600 | -1.40984300 |
| H  | -0.52774400 | 5.13008600  | -1.62012200 |
| H  | -1.42369200 | 5.71924600  | -0.22569800 |
| C  | -4.52630600 | -2.86448700 | -0.87213500 |
| H  | -6.28933600 | -1.75879600 | -0.25636100 |
| H  | -2.62785700 | -3.70299700 | -1.46646200 |
| H  | -5.04410300 | -3.81898800 | -0.90823500 |
| H  | -0.37885200 | 2.59221100  | -2.02949300 |
| H  | 0.20636900  | 2.16109200  | 0.90814000  |
| O  | -1.48997800 | 1.62744600  | 2.25729300  |
| H  | -1.01753800 | 1.64660700  | 3.09889900  |
| H  | -1.15691900 | 0.79130000  | 1.84318600  |
| Cl | 1.18434100  | -0.41198600 | 3.71618000  |
| C  | -0.24559900 | -1.72747800 | 1.70295700  |
| C  | 1.07755200  | -1.74754200 | 2.47127800  |
| O  | -0.39866100 | -0.49859100 | 1.06050600  |
| H  | -0.13945200 | -2.53907300 | 0.96152100  |
| H  | 1.91011400  | -1.57683300 | 1.78931600  |
| H  | 1.22440200  | -2.68209800 | 3.01605600  |
| C  | -1.46903900 | -2.02050400 | 2.57318000  |
| H  | -2.35662100 | -2.07408400 | 1.93758300  |
| H  | -1.36257500 | -2.97044300 | 3.10863800  |
| H  | -1.61690300 | -1.21952400 | 3.30232400  |

**subsequent hydrolysis (H<sub>2</sub>O molecule is opposite the counterion Cl<sup>-</sup>)**

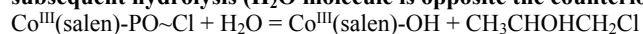

Charge: 0

Spin Multiplicity: 3

Sum of electronic and thermal Free Energies (a.u.): -1908.847407

Thermal correction to Gibbs Free Energy (a.u.): 0.420649

No imaginary frequency

Calculation of single point energy based on the optimized structure, Ep = -3147.5417245 a.u.

|    |             |             |             |
|----|-------------|-------------|-------------|
| C  | -5.16105400 | 2.91209200  | 0.42646800  |
| C  | -5.70908000 | 1.63534000  | 0.19646200  |
| C  | -3.79644300 | 3.12912100  | 0.36472400  |
| H  | -5.82081100 | 3.74424000  | 0.65647100  |
| C  | -4.85824300 | 0.58918100  | -0.10116000 |
| H  | -6.78114000 | 1.47944000  | 0.24672000  |
| C  | -2.90056300 | 2.06762700  | 0.08511000  |
| H  | -3.36820800 | 4.11014600  | 0.53885900  |
| C  | -3.45891700 | 0.77575000  | -0.15704400 |
| H  | -5.25675400 | -0.40361700 | -0.29609900 |
| O  | -1.61783900 | 2.32737100  | 0.04626500  |
| C  | -2.63065300 | -0.32571700 | -0.54710700 |
| Co | -0.21120300 | 1.09831700  | 0.02213000  |
| N  | -1.34025500 | -0.31727100 | -0.57897400 |
| H  | -3.14768700 | -1.23030000 | -0.86676000 |
| N  | 1.06655700  | 0.33524700  | -1.22638600 |
| C  | -0.53694200 | -1.44439300 | -1.06821300 |
| C  | 2.31469100  | 0.68548700  | -1.28861900 |
| C  | 0.53792800  | -0.82258700 | -1.97440600 |
| C  | -1.27960200 | -2.57468700 | -1.77321800 |
| H  | 2.98313600  | 0.10782600  | -1.92733100 |
| C  | 2.91843300  | 1.77400100  | -0.59275600 |
| C  | 1.55679300  | -1.88623100 | -2.38730500 |
| C  | -0.26908500 | -3.64698600 | -2.20753600 |
| H  | -1.82100500 | -2.18521900 | -2.64691700 |
| H  | -2.01351600 | -3.02078000 | -1.09542900 |
| C  | 4.30354200  | 2.00393800  | -0.79200900 |
| C  | 2.17200200  | 2.64109100  | 0.27087300  |
| C  | 0.84243900  | -3.05595100 | -3.08206800 |
| H  | 2.30602200  | -1.46788600 | -3.06797200 |
| H  | 2.07248800  | -2.23131300 | -1.48325900 |
| H  | -0.78764600 | -4.44864300 | -2.74401700 |

|    |             |             |             |
|----|-------------|-------------|-------------|
| H  | 0.17037300  | -4.09514400 | -1.30881500 |
| C  | 4.95633900  | 3.05028800  | -0.17973000 |
| H  | 4.84704000  | 1.32795300  | -1.44767000 |
| C  | 2.87101500  | 3.71875100  | 0.88101500  |
| O  | 0.90186600  | 2.51617300  | 0.52743000  |
| H  | 0.41243800  | -2.70385300 | -4.02995700 |
| H  | 1.57355000  | -3.82967100 | -3.33926100 |
| C  | 4.21893400  | 3.91204900  | 0.66096300  |
| H  | 6.01645500  | 3.21265200  | -0.33988100 |
| H  | 2.29957500  | 4.37738200  | 1.52588700  |
| H  | 4.72164700  | 4.74354300  | 1.14740900  |
| H  | 0.03700300  | -0.42255400 | -2.86937500 |
| H  | -0.01517100 | -1.85598800 | -0.19905200 |
| O  | 0.09443800  | 0.21281700  | 1.65682900  |
| H  | 0.51325000  | 0.88932700  | 2.20964300  |
| H  | 1.19809400  | -0.98786000 | 1.33364900  |
| Cl | -0.79542200 | -3.83709200 | 1.59580900  |
| C  | 1.65785900  | -2.63363700 | 2.28152300  |
| C  | 0.21519200  | -2.84148800 | 2.74977000  |
| O  | 1.73816700  | -1.80338000 | 1.14399000  |
| H  | 2.13859800  | -2.14023300 | 3.14871500  |
| H  | -0.29223600 | -1.87932200 | 2.82598900  |
| H  | 0.18356800  | -3.37249400 | 3.70257800  |
| C  | 2.40919600  | -3.92372400 | 1.98693600  |
| H  | 3.44464400  | -3.69217800 | 1.72479300  |
| H  | 2.40556900  | -4.59049800 | 2.85477500  |
| H  | 1.94552800  | -4.44451900 | 1.14540800  |

**subsequent hydrolysis (H<sub>2</sub>O molecule is at the same side with the ion Cl)**

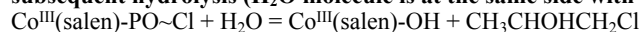

Charge: 0

Spin Multiplicity: 3

Sum of electronic and thermal Free Energies (a.u.): -1908.817329

Thermal correction to Gibbs Free Energy (a.u.): 0.417627

Imaginary frequencies: -854.88

Calculation of single point energy based on the optimized structure, Et = -3147.5063782 a.u.

|    |             |             |             |
|----|-------------|-------------|-------------|
| C  | 2.66868100  | -4.32589900 | -1.53571500 |
| C  | 3.82764100  | -3.60030900 | -1.87719600 |
| C  | 1.60440000  | -3.71959300 | -0.89714900 |
| H  | 2.60866000  | -5.38363200 | -1.77728100 |
| C  | 3.88794100  | -2.26006000 | -1.55687400 |
| H  | 4.65639000  | -4.08895300 | -2.37761300 |
| C  | 1.63085800  | -2.34007100 | -0.56181000 |
| H  | 0.71625900  | -4.27919500 | -0.62485800 |
| C  | 2.81123900  | -1.60209500 | -0.91776700 |
| H  | 4.77517000  | -1.67925000 | -1.79866500 |
| O  | 0.61417300  | -1.84751800 | 0.09506200  |
| C  | 2.96825600  | -0.22326000 | -0.55634400 |
| Co | 0.11520000  | -0.02179500 | 0.02610200  |
| N  | 2.00241300  | 0.52725500  | -0.14667200 |
| H  | 3.97788900  | 0.19212900  | -0.61866100 |
| N  | -0.19786200 | 1.85823700  | -0.21247900 |
| C  | 2.14287100  | 1.84745800  | 0.46148900  |
| C  | -1.28609400 | 2.33419000  | -0.72442100 |
| C  | 1.00076500  | 2.71201300  | -0.08839300 |
| C  | 3.47278200  | 2.58481000  | 0.33994400  |
| H  | -1.37943800 | 3.41947300  | -0.81978600 |
| C  | -2.34219300 | 1.54920000  | -1.28664100 |
| C  | 0.85270400  | 3.96917300  | 0.77073300  |
| C  | 3.38066000  | 3.89471900  | 1.14512100  |
| H  | 3.69495100  | 2.79688000  | -0.71481000 |
| H  | 4.29236500  | 1.97142600  | 0.72958200  |
| C  | -3.57015100 | 2.16624600  | -1.60922800 |
| C  | -2.09654800 | 0.19490800  | -1.68398900 |
| C  | 2.17515100  | 4.75515800  | 0.73370200  |
| H  | 0.03422900  | 4.59980000  | 0.40805200  |
| H  | 0.60301400  | 3.66838900  | 1.79486400  |
| H  | 4.30607800  | 4.46893700  | 1.03130800  |
| H  | 3.29512900  | 3.64268600  | 2.20977400  |
| C  | -4.56330000 | 1.47818100  | -2.27884700 |



|    |             |             |             |
|----|-------------|-------------|-------------|
| H  | -3.72567300 | 3.20023700  | -1.31117700 |
| C  | -3.11921700 | -0.47445800 | -2.40183300 |
| O  | -0.97801200 | -0.44036700 | -1.44512400 |
| H  | 2.33277800  | 5.13310900  | -0.28564300 |
| H  | 2.10437400  | 5.63306100  | 1.38426500  |
| C  | -4.32189300 | 0.14973500  | -2.67960700 |
| H  | -5.51053300 | 1.95592400  | -2.50412200 |
| H  | -2.92463600 | -1.49625600 | -2.70918800 |
| H  | -5.09258100 | -0.39579200 | -3.21705900 |
| Cl | -1.21761200 | -2.65099700 | 3.16294400  |
| C  | -2.67388800 | -1.10267600 | 1.32257400  |
| C  | -2.05804600 | -2.48445500 | 1.54469100  |
| O  | -1.73175700 | -0.06994800 | 1.23051800  |
| H  | -3.16881600 | -1.20001800 | 0.34035800  |
| H  | -1.28727900 | -2.68209900 | 0.80287300  |
| H  | -2.82548100 | -3.26044100 | 1.53043400  |
| C  | -3.74081300 | -0.74131400 | 2.35721400  |
| H  | -4.18958500 | 0.21932300  | 2.09206600  |
| H  | -4.53040700 | -1.50024000 | 2.39798800  |
| H  | -3.29167400 | -0.65336200 | 3.35011700  |
| H  | 1.27701700  | 3.01464100  | -1.10963800 |
| H  | 1.92281200  | 1.67050300  | 1.52179000  |
| O  | 0.40210400  | 0.12987700  | 2.10200700  |
| H  | 0.71369900  | -0.74878200 | 2.36345300  |
| H  | -0.79045500 | -0.00747700 | 1.97321300  |

**subsequent hydrolysis (H<sub>2</sub>O molecule is at the same side with the ion Cl<sup>-</sup>)**

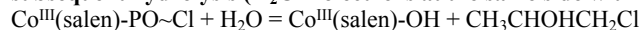

Charge: 0

Spin Multiplicity: 3

Sum of electronic and thermal Free Energies (a.u.): -1908.848416

Thermal correction to Gibbs Free Energy (a.u.): 0.418912

No imaginary frequency

Calculation of single point energy based on the optimized structure, Er = -3147.5442162 a.u.

|    |             |             |             |
|----|-------------|-------------|-------------|
| C  | 4.82480100  | -2.48743300 | -1.26229900 |
| C  | 5.46515700  | -1.27205000 | -0.93924800 |
| C  | 3.44896500  | -2.57744600 | -1.32845100 |
| H  | 5.42487500  | -3.37105300 | -1.46146300 |
| C  | 4.69251700  | -0.15851100 | -0.69022500 |
| H  | 6.54703700  | -1.21777800 | -0.88889700 |
| C  | 2.62691900  | -1.44992400 | -1.06107100 |
| H  | 2.95006200  | -3.50813100 | -1.57556100 |
| C  | 3.27809600  | -0.21517500 | -0.74557100 |
| H  | 5.16188500  | 0.79049000  | -0.44241600 |
| O  | 1.33388300  | -1.60043100 | -1.11947200 |
| C  | 2.53782200  | 0.97936000  | -0.49539400 |
| Co | 0.00165100  | -0.32250300 | -0.79965600 |
| N  | 1.24718200  | 1.09699700  | -0.52418600 |
| H  | 3.12877100  | 1.86333100  | -0.25582600 |
| N  | -1.30106900 | 1.08406700  | -0.94583700 |
| C  | 0.55929200  | 2.33397600  | -0.11636100 |
| C  | -2.56822500 | 0.87788800  | -0.79215200 |
| C  | -0.70098100 | 2.42593600  | -0.98935700 |
| C  | 1.36867600  | 3.62836300  | -0.16751700 |
| H  | -3.23079500 | 1.73586800  | -0.68684700 |
| C  | -3.18662700 | -0.41184900 | -0.76564600 |
| C  | -1.59027600 | 3.58395000  | -0.53770000 |
| C  | 0.48207900  | 4.80685400  | 0.26528500  |
| H  | 1.74800500  | 3.79120500  | -1.18599900 |
| H  | 2.23579200  | 3.56772700  | 0.49832800  |
| C  | -4.56617500 | -0.49642500 | -0.46867000 |
| C  | -2.46221400 | -1.59281800 | -1.12208700 |
| C  | -0.79422600 | 4.89685300  | -0.57839300 |
| H  | -2.47009300 | 3.66888700  | -1.18503600 |
| H  | -1.93049900 | 3.37324900  | 0.48289600  |
| H  | 1.05073500  | 5.74033700  | 0.19787500  |
| H  | 0.20778100  | 4.67484000  | 1.31924300  |
| C  | -5.23467700 | -1.70327500 | -0.50384400 |
| H  | -5.09344200 | 0.41528900  | -0.19962400 |
| C  | -3.18067800 | -2.81306500 | -1.18589900 |

|    |             |             |             |
|----|-------------|-------------|-------------|
| O  | -1.18584300 | -1.60982100 | -1.41019800 |
| H  | -0.52794500 | 5.13082900  | -1.61839300 |
| H  | -1.42398500 | 5.71942300  | -0.22378800 |
| C  | -4.52622200 | -2.86401100 | -0.87322400 |
| H  | -6.28927800 | -1.75847600 | -0.25722700 |
| H  | -2.62775800 | -3.70239100 | -1.46766900 |
| H  | -5.04405400 | -3.81848000 | -0.90967900 |
| Cl | 1.18328600  | -0.41539700 | 3.71711500  |
| C  | -0.24581000 | -1.72842900 | 1.70173500  |
| C  | 1.07682700  | -1.74973200 | 2.47088700  |
| O  | -0.39787600 | -0.49886700 | 1.06031000  |
| H  | -0.13958100 | -2.53939400 | 0.95964000  |
| H  | 1.90989900  | -1.57868700 | 1.78963700  |
| H  | 1.22294700  | -2.68486600 | 3.01486400  |
| C  | -1.46988300 | -2.02167100 | 2.57100400  |
| H  | -2.35713000 | -2.07446300 | 1.93487700  |
| H  | -1.36407200 | -2.97205600 | 3.10580500  |
| H  | -1.61785900 | -1.22119600 | 3.30067700  |
| H  | -0.37881500 | 2.59313600  | -2.02864900 |
| H  | 0.20637900  | 2.16101900  | 0.90884900  |
| O  | -1.48996500 | 1.62653700  | 2.25771700  |
| H  | -1.01775100 | 1.64502400  | 3.09946500  |
| H  | -1.15688800 | 0.79065600  | 1.84315700  |

The product complex cannot be located.

five-coordinated Co<sup>III</sup>(salen)-Cl counterion addition in the middle carbon and subsequent hydrolysis

**Co<sup>III</sup>(salen)-Cl counterion addition in the middle carbon**

Co<sup>III</sup>(salen)-Cl + PO = Co<sup>III</sup>(salen)-PO~Cl

Charge: 0

Spin Multiplicity: 3

Sum of electronic and thermal Free Energies (a.u.): -1832.355559

Thermal correction to Gibbs Free Energy (a.u.): 0.393854

Imaginary frequencies: -340.70

Calculation of single point energy based on the optimized structure, Et = -3070.9952069 a.u.

|    |             |             |             |
|----|-------------|-------------|-------------|
| C  | 4.20220400  | -2.95903600 | -1.59654700 |
| C  | 4.96355300  | -1.79511600 | -1.38534000 |
| C  | 2.82406500  | -2.94719900 | -1.46232600 |
| H  | 4.70177400  | -3.88639300 | -1.86274900 |
| C  | 4.31391200  | -0.62063400 | -1.05429300 |
| H  | 6.04326500  | -1.81920900 | -1.48420300 |
| C  | 2.14362500  | -1.76347600 | -1.09278200 |
| H  | 2.23012700  | -3.84248700 | -1.61066600 |
| C  | 2.91082200  | -0.57741200 | -0.91397200 |
| H  | 4.87768100  | 0.29326100  | -0.88889300 |
| O  | 0.84339100  | -1.82716100 | -0.90293700 |
| C  | 2.28310800  | 0.68073500  | -0.63538300 |
| Co | -0.31556400 | -0.47312500 | -0.39112600 |
| N  | 1.00772000  | 0.87364300  | -0.56355700 |
| H  | 2.94198900  | 1.53602800  | -0.52090300 |
| N  | -1.56372800 | 0.96195200  | -0.71416600 |
| C  | 0.43321300  | 2.17474100  | -0.19863200 |
| C  | -2.84962900 | 0.85777300  | -0.58958400 |
| C  | -0.89281500 | 2.25441800  | -0.96415800 |
| C  | 1.30961500  | 3.40121900  | -0.43393700 |
| H  | -3.45473500 | 1.75883600  | -0.69461500 |
| C  | -3.56983300 | -0.34588200 | -0.32525300 |
| C  | -1.67500000 | 3.51249400  | -0.58713200 |
| C  | 0.52595200  | 4.66798200  | -0.06136100 |
| H  | 1.62273700  | 3.44425600  | -1.48674300 |
| H  | 2.20154300  | 3.32812600  | 0.19338400  |
| C  | -4.97818400 | -0.26909900 | -0.18832100 |
| C  | -2.91634200 | -1.61693700 | -0.23519400 |
| C  | -0.80493100 | 4.75867200  | -0.81614500 |
| H  | -2.59341300 | 3.59539900  | -1.17836600 |
| H  | -1.96704700 | 3.44671000  | 0.46895300  |
| H  | 1.13668700  | 5.55393300  | -0.26380600 |
| H  | 0.33455100  | 4.65735300  | 1.01899100  |
| C  | -5.74167300 | -1.39434300 | 0.03317500  |
| H  | -5.45050800 | 0.70758800  | -0.26098200 |

|    |             |             |             |
|----|-------------|-------------|-------------|
| C  | -3.73042200 | -2.76149800 | -0.02121600 |
| O  | -1.63036300 | -1.79397900 | -0.35382100 |
| H  | -0.60811500 | 4.86523000  | -1.89165300 |
| H  | -1.35941700 | 5.65200200  | -0.50977600 |
| C  | -5.09920400 | -2.64836400 | 0.11279700  |
| H  | -6.81811600 | -1.32071000 | 0.14162500  |
| H  | -3.23031700 | -3.72212500 | 0.03592200  |
| H  | -5.69184500 | -3.54287800 | 0.28342900  |
| Cl | 2.45285800  | 1.33565900  | 2.41538400  |
| C  | 1.02366000  | -0.96533300 | 2.91105100  |
| C  | -0.37532800 | -1.16864500 | 2.47166300  |
| O  | -0.30220900 | -0.13449900 | 1.52342600  |
| H  | 1.23473500  | -0.30256600 | 3.73834000  |
| H  | -1.12676100 | -0.96286800 | 3.24562200  |
| H  | -0.55866700 | -2.15923700 | 2.03155800  |
| C  | 2.09435200  | -1.83066000 | 2.38757800  |
| H  | 3.07724500  | -1.37084300 | 2.45747700  |
| H  | 2.06478500  | -2.74161800 | 3.01485100  |
| H  | 1.88401800  | -2.15307400 | 1.36752900  |
| H  | -0.65779400 | 2.28739800  | -2.03872800 |
| H  | 0.22439800  | 2.09562200  | 0.87584900  |

**Co<sup>III</sup>(salen)-Cl counterion addition in the middle carbon**

Co<sup>III</sup>(salen)-Cl + PO = Co<sup>III</sup>(salen)-PO-Cl

Charge: 0

Spin Multiplicity: 3

Sum of electronic and thermal Free Energies (a.u.): -1832.391361

Thermal correction to Gibbs Free Energy (a.u.): 0.396725

No imaginary frequency

Calculation of single point energy based on the optimized structure, Er = -3071.0370714 a.u.

|    |             |             |             |
|----|-------------|-------------|-------------|
| C  | 4.13720200  | -3.24884900 | -1.18048100 |
| C  | 4.94053100  | -2.13129000 | -0.88307400 |
| C  | 2.75815600  | -3.14596300 | -1.22237200 |
| H  | 4.60461100  | -4.21121800 | -1.36875000 |
| C  | 4.33824900  | -0.91020500 | -0.64855000 |
| H  | 6.01944400  | -2.23019100 | -0.83485000 |
| C  | 2.12239800  | -1.91092800 | -0.95700200 |
| H  | 2.12772300  | -4.00298000 | -1.43227200 |
| C  | 2.93473500  | -0.77222900 | -0.69769100 |
| H  | 4.93091900  | -0.03620000 | -0.39723200 |
| O  | 0.80650600  | -1.88447700 | -0.94581400 |
| C  | 2.36373400  | 0.52498500  | -0.50121500 |
| Co | -0.30085800 | -0.46514400 | -0.58841900 |
| N  | 1.08786200  | 0.79628300  | -0.59366000 |
| H  | 3.05480000  | 1.34324400  | -0.35086800 |
| N  | -1.47595200 | 1.04316100  | -0.68936700 |
| C  | 0.60138600  | 2.13922800  | -0.23042200 |
| C  | -2.74905900 | 1.00623500  | -0.45701000 |
| C  | -0.74483500 | 2.30112900  | -0.93823700 |
| C  | 1.53702800  | 3.30835400  | -0.53414200 |
| H  | -3.29860300 | 1.94703000  | -0.42939500 |
| C  | -3.51938000 | -0.18057000 | -0.24953500 |
| C  | -1.44071500 | 3.59705800  | -0.52737100 |
| C  | 0.85121200  | 4.62377100  | -0.13811600 |
| H  | 1.79453200  | 3.31352700  | -1.60250900 |
| H  | 2.44890700  | 3.19258000  | 0.05572100  |
| C  | -4.89455000 | -0.05415300 | 0.05836400  |
| C  | -2.94646400 | -1.48031400 | -0.41311500 |
| C  | -0.51500500 | 4.79124100  | -0.81254900 |
| H  | -2.38328700 | 3.72580000  | -1.07111900 |
| H  | -1.67854100 | 3.55332200  | 0.54348200  |
| H  | 1.50112700  | 5.46825700  | -0.38916300 |
| H  | 0.72752300  | 4.63646300  | 0.95202500  |
| C  | -5.69780800 | -1.16489600 | 0.21396000  |
| H  | -5.31039900 | 0.94369300  | 0.17295500  |
| C  | -3.79883200 | -2.60446400 | -0.27112400 |
| O  | -1.68627900 | -1.69176400 | -0.69460400 |
| H  | -0.37856600 | 4.88395900  | -1.89855700 |
| H  | -0.99888800 | 5.71493400  | -0.47806400 |
| C  | -5.13519200 | -2.44629300 | 0.04189700  |

|    |             |             |             |
|----|-------------|-------------|-------------|
| H  | -6.74869300 | -1.05607400 | 0.45820100  |
| H  | -3.35726800 | -3.58542100 | -0.40815800 |
| H  | -5.76218900 | -3.32578900 | 0.15690700  |
| Cl | 2.81719800  | 1.39272700  | 2.18015200  |
| C  | 0.31063000  | -0.83005900 | 2.65926400  |
| C  | -1.12222600 | -1.11405100 | 2.48817500  |
| O  | -0.44938100 | -0.23079200 | 1.55678800  |
| H  | 0.61782200  | -0.05899500 | 3.36004600  |
| H  | -1.87023900 | -0.61301100 | 3.09801900  |
| H  | -1.42256900 | -2.06639800 | 2.05740300  |
| C  | 1.36372300  | -1.83981800 | 2.31588400  |
| H  | 2.26538700  | -1.31491000 | 1.99342300  |
| H  | 1.60787000  | -2.41337800 | 3.21701500  |
| H  | 1.01977300  | -2.52813800 | 1.54087000  |
| H  | -0.54991500 | 2.33015600  | -2.02065400 |
| H  | 0.44987100  | 2.10491700  | 0.85724900  |

**Co<sup>III</sup>(salen)-Cl counterion addition in the middle carbon**

Co<sup>III</sup>(salen)-Cl + PO = Co<sup>III</sup>(salen)-PO~Cl

Charge: 0

Spin Multiplicity: 3

Sum of electronic and thermal Free Energies (a.u.): -1832.419001

Thermal correction to Gibbs Free Energy (a.u.): 0.396654

No imaginary frequency

Calculation of single point energy based on the optimized structure, Ep = -3071.0561361 a.u.

|    |             |             |             |
|----|-------------|-------------|-------------|
| C  | 4.40642700  | -1.84497600 | -2.49367900 |
| C  | 5.06919400  | -0.67091300 | -2.08485100 |
| C  | 3.05214700  | -2.01802900 | -2.27550400 |
| H  | 4.96868800  | -2.63134900 | -2.98983900 |
| C  | 4.34028000  | 0.32031900  | -1.45925900 |
| H  | 6.13183900  | -0.54808100 | -2.26295700 |
| C  | 2.28341500  | -1.02573600 | -1.61606500 |
| H  | 2.53701900  | -2.91977800 | -2.58807200 |
| C  | 2.95731800  | 0.16835900  | -1.20964600 |
| H  | 4.82574800  | 1.24033400  | -1.14205300 |
| O  | 1.01032800  | -1.24942500 | -1.42105300 |
| C  | 2.24324700  | 1.25496000  | -0.60824300 |
| Co | -0.17738900 | -0.27586600 | -0.33191000 |
| N  | 0.99927000  | 1.22753800  | -0.26707000 |
| H  | 2.80589600  | 2.17601000  | -0.45153000 |
| N  | -1.55562900 | 1.10090800  | -0.61428600 |
| C  | 0.27100200  | 2.37384700  | 0.27834000  |
| C  | -2.82738600 | 0.85596100  | -0.66953000 |
| C  | -1.01376400 | 2.46942200  | -0.57035000 |
| C  | 1.01114600  | 3.70726600  | 0.33501400  |
| H  | -3.52229900 | 1.69628700  | -0.72523300 |
| C  | -3.42995100 | -0.43823500 | -0.65641300 |
| C  | -1.94587000 | 3.55515700  | -0.02799000 |
| C  | 0.07687600  | 4.79373000  | 0.88740800  |
| H  | 1.35030200  | 3.98868600  | -0.67141700 |
| H  | 1.90035100  | 3.61908600  | 0.96817700  |
| C  | -4.84494100 | -0.50918100 | -0.72451200 |
| C  | -2.66164900 | -1.64817300 | -0.58040700 |
| C  | -1.20872500 | 4.90038200  | 0.05903100  |
| H  | -2.82777900 | 3.66545400  | -0.66734900 |
| H  | -2.29974400 | 3.25306700  | 0.96629700  |
| H  | 0.59739200  | 5.75680400  | 0.90570400  |
| H  | -0.17814100 | 4.55283600  | 1.92744600  |
| C  | -5.51044000 | -1.71448200 | -0.72276700 |
| H  | -5.40296300 | 0.42278100  | -0.77855300 |
| C  | -3.37846400 | -2.87736400 | -0.58440100 |
| O  | -1.36400000 | -1.70662900 | -0.52032400 |
| H  | -0.95881400 | 5.23982600  | -0.95525200 |
| H  | -1.87487200 | 5.65704200  | 0.48638400  |
| C  | -4.75540800 | -2.90536300 | -0.65279900 |
| H  | -6.59303700 | -1.75105300 | -0.77321500 |
| H  | -2.79345600 | -3.78912800 | -0.53257300 |
| H  | -5.26724200 | -3.86390700 | -0.65078100 |
| Cl | 1.78018500  | -0.96984200 | 4.05114400  |
| C  | 1.07829700  | -2.08390100 | 2.76046600  |

|   |             |             |             |
|---|-------------|-------------|-------------|
| C | -0.23780700 | -1.50847400 | 2.23150100  |
| O | -0.04870500 | -0.33411300 | 1.50627200  |
| H | 0.86382300  | -3.01075300 | 3.29953500  |
| H | -0.90640800 | -1.31375700 | 3.08349400  |
| H | -0.69716200 | -2.30059000 | 1.61917800  |
| C | 2.12256700  | -2.30607800 | 1.67975300  |
| H | 3.01194100  | -2.79436800 | 2.08422700  |
| H | 1.69938900  | -2.93226000 | 0.88684600  |
| H | 2.41567700  | -1.35424200 | 1.23535000  |
| H | -0.70797700 | 2.73588900  | -1.59379600 |
| H | -0.02335400 | 2.07207100  | 1.29186700  |

**subsequent hydrolysis**

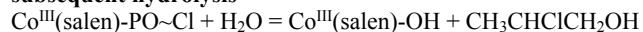

Charge: 0

Spin Multiplicity: 3

Sum of electronic and thermal Free Energies (a.u.): -1908.819440

Thermal correction to Gibbs Free Energy (a.u.): 0.416788

Imaginary frequencies: -644.94

Calculation of single point energy based on the optimized structure, Et = -3147.5088795 a.u.

|    |             |             |             |
|----|-------------|-------------|-------------|
| C  | 1.97237900  | -4.79285400 | -1.05256800 |
| C  | 2.71650200  | -4.14462100 | -2.05966500 |
| C  | 1.11386000  | -4.09089300 | -0.22954100 |
| H  | 2.07544400  | -5.86628100 | -0.91850100 |
| C  | 2.57578100  | -2.78168200 | -2.21382700 |
| H  | 3.38848900  | -4.70845700 | -2.69720000 |
| C  | 0.94261200  | -2.68777400 | -0.36685300 |
| H  | 0.54493500  | -4.58577000 | 0.54997000  |
| C  | 1.69394500  | -2.03175000 | -1.39969000 |
| H  | 3.14522500  | -2.25528900 | -2.97617600 |
| O  | 0.16040900  | -2.07556900 | 0.47835900  |
| C  | 1.64132900  | -0.61194100 | -1.57926100 |
| Co | -0.63152500 | -0.39657100 | 0.16430200  |
| N  | 0.76924400  | 0.17183000  | -1.03404900 |
| H  | 2.41040100  | -0.17114500 | -2.21615400 |
| N  | -1.42347000 | 1.28584700  | -0.30582800 |
| C  | 0.86930300  | 1.63515600  | -1.00874800 |
| C  | -2.69097700 | 1.52944500  | -0.19778800 |
| C  | -0.55594400 | 2.17885900  | -1.10218100 |
| C  | 1.78373600  | 2.32450700  | -2.01420800 |
| H  | -3.04745500 | 2.52567400  | -0.47178400 |
| C  | -3.68859600 | 0.56498800  | 0.14533900  |
| C  | -0.56143200 | 3.65942800  | -0.71554500 |
| C  | 1.78618200  | 3.83317100  | -1.70667100 |
| H  | 1.43906200  | 2.13742100  | -3.04070400 |
| H  | 2.80436800  | 1.93939000  | -1.92821300 |
| C  | -5.00003000 | 0.99603900  | 0.44451500  |
| C  | -3.40842200 | -0.83432000 | 0.00399800  |
| C  | 0.36981100  | 4.42714200  | -1.67012400 |
| H  | -1.57157300 | 4.07924100  | -0.76599300 |
| H  | -0.21852400 | 3.75198100  | 0.32152200  |
| H  | 2.39528600  | 4.36352200  | -2.44624100 |
| H  | 2.26699700  | 3.98244000  | -0.73236500 |
| C  | -6.02363600 | 0.08995100  | 0.63647500  |
| H  | -5.18956300 | 2.06344900  | 0.52833400  |
| C  | -4.48811900 | -1.73883400 | 0.17160900  |
| O  | -2.23055700 | -1.30639100 | -0.30309800 |
| H  | -0.06100200 | 4.40134300  | -2.68049100 |
| H  | 0.41339400  | 5.48119900  | -1.37636300 |
| C  | -5.75422200 | -1.28611500 | 0.49077300  |
| H  | -7.02329400 | 0.42989700  | 0.88437000  |
| H  | -4.27516500 | -2.79564300 | 0.05249200  |
| H  | -6.55705000 | -2.00512700 | 0.62918900  |
| Cl | 3.68919000  | 1.77805400  | 1.12256400  |
| C  | 3.08015200  | 0.74400400  | 2.53219700  |
| C  | 1.93558000  | -0.14653800 | 2.05414500  |
| O  | 0.79997000  | 0.58025400  | 1.71301400  |
| H  | 2.69990900  | 1.47885900  | 3.24416400  |
| H  | 1.73451000  | -0.85253600 | 2.88226800  |
| H  | 2.30910900  | -0.75509000 | 1.21576900  |

|   |             |             |             |
|---|-------------|-------------|-------------|
| C | 4.25422300  | -0.03889300 | 3.09602400  |
| H | 5.07426000  | 0.62209100  | 3.38415900  |
| H | 3.92740600  | -0.59248900 | 3.98334700  |
| H | 4.62953200  | -0.75729100 | 2.36116000  |
| H | -0.89049900 | 2.08524000  | -2.14662400 |
| H | 1.23023300  | 1.85115800  | 0.00170100  |
| O | -1.30759400 | -0.34873100 | 2.12025000  |
| H | -1.23229400 | -1.27531500 | 2.38894800  |
| H | -0.26955800 | 0.12892200  | 2.21019000  |

#### subsequent hydrolysis

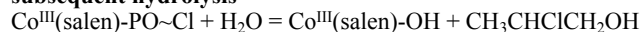

Charge: 0

Spin Multiplicity: 3

Sum of electronic and thermal Free Energies (a.u.): -1908.843340

Thermal correction to Gibbs Free Energy (a.u.): 0.418528

No imaginary frequency

Calculation of single point energy based on the optimized structure, Er = -3147.5408425 a.u.

|    |             |             |             |
|----|-------------|-------------|-------------|
| C  | 4.52360200  | -2.85138900 | -1.35353600 |
| C  | 5.15262700  | -1.60831800 | -1.58626200 |
| C  | 3.18472000  | -2.92941300 | -1.03117900 |
| H  | 5.10594400  | -3.76588300 | -1.42646300 |
| C  | 4.40491800  | -0.45624800 | -1.48778500 |
| H  | 6.20757700  | -1.56498400 | -1.83370000 |
| C  | 2.38866000  | -1.75688000 | -0.91918400 |
| H  | 2.69709900  | -3.88033500 | -0.84675400 |
| C  | 3.02533000  | -0.49884500 | -1.16682200 |
| H  | 4.86603200  | 0.51414200  | -1.65502100 |
| O  | 1.13716100  | -1.89203600 | -0.58835300 |
| C  | 2.31021900  | 0.72628600  | -1.05348900 |
| Co | -0.19878200 | -0.57718900 | -0.57326500 |
| N  | 1.03362500  | 0.84422400  | -0.84897800 |
| H  | 2.90190000  | 1.63768800  | -1.13500800 |
| N  | -1.54044200 | 0.77610800  | -0.90103600 |
| C  | 0.39666900  | 2.13237000  | -0.53943100 |
| C  | -2.80114200 | 0.58859500  | -0.70081200 |
| C  | -0.97210900 | 2.09400400  | -1.23017100 |
| C  | 1.16936200  | 3.40075900  | -0.89013100 |
| H  | -3.47181500 | 1.44644900  | -0.74469400 |
| C  | -3.41205900 | -0.68426800 | -0.45825200 |
| C  | -1.81682800 | 3.31126600  | -0.85185500 |
| C  | 0.32829500  | 4.62806000  | -0.50576700 |
| H  | 1.39762200  | 3.41817600  | -1.96503600 |
| H  | 2.12045100  | 3.42676500  | -0.34875100 |
| C  | -4.79523000 | -0.73033500 | -0.17283200 |
| C  | -2.67687800 | -1.90018400 | -0.61289000 |
| C  | -1.04923000 | 4.60166100  | -1.17766800 |
| H  | -2.76548600 | 3.30761900  | -1.40019600 |
| H  | -2.03523400 | 3.24621500  | 0.22046500  |
| H  | 0.86582500  | 5.54340600  | -0.77517500 |
| H  | 0.19916000  | 4.64051100  | 0.58339100  |
| C  | -5.45838700 | -1.93257900 | -0.02607000 |
| H  | -5.33359600 | 0.20881700  | -0.06931800 |
| C  | -3.38750200 | -3.12000900 | -0.49026900 |
| O  | -1.39610700 | -1.95393800 | -0.88006600 |
| H  | -0.92385300 | 4.68759500  | -2.26607400 |
| H  | -1.64014600 | 5.46779500  | -0.86172400 |
| C  | -4.73808900 | -3.13130500 | -0.19411400 |
| H  | -6.51789500 | -1.95536400 | 0.20459200  |
| H  | -2.82622100 | -4.03863000 | -0.62127300 |
| H  | -5.25073000 | -4.08350200 | -0.08892700 |
| Cl | 2.32972700  | 0.77811200  | 2.35213800  |
| C  | 0.95612000  | -0.06668900 | 3.25183200  |
| C  | 0.20315400  | -0.98375600 | 2.28702800  |
| O  | -0.46092400 | -0.25445900 | 1.30583100  |
| H  | 0.30054700  | 0.75668400  | 3.54314100  |
| H  | -0.52008900 | -1.54952900 | 2.90448700  |
| H  | 0.89944200  | -1.71582200 | 1.85512300  |
| C  | 1.53337800  | -0.79623000 | 4.45253700  |
| H  | 2.08433300  | -0.11501600 | 5.10443000  |

|   |             |             |             |
|---|-------------|-------------|-------------|
| H | 0.71859400  | -1.24584200 | 5.03144300  |
| H | 2.21048000  | -1.59409800 | 4.13355400  |
| H | -0.79069600 | 2.09457300  | -2.31627900 |
| H | 0.22238300  | 2.11523700  | 0.54230400  |
| O | -1.60817800 | 1.97119300  | 2.18221200  |
| H | -2.37448800 | 1.71327600  | 2.70753400  |
| H | -1.23088200 | 1.11254100  | 1.85158000  |

**subsequent hydrolysis**

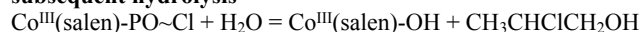

Charge: 0

Spin Multiplicity: 3

Sum of electronic and thermal Free Energies (a.u.): -1908.844399

Thermal correction to Gibbs Free Energy (a.u.): 0.420106

No imaginary frequency

Calculation of single point energy based on the optimized structure,  $E_p = -3147.5406492$  a.u.

|    |             |             |             |
|----|-------------|-------------|-------------|
| C  | -2.53956900 | 4.02049100  | -1.81935600 |
| C  | -3.54072000 | 3.03705400  | -1.93705000 |
| C  | -1.25440200 | 3.69407400  | -1.42410000 |
| H  | -2.77896200 | 5.05726900  | -2.03987400 |
| C  | -3.21937700 | 1.72181900  | -1.66198400 |
| H  | -4.54498000 | 3.30794900  | -2.24433700 |
| C  | -0.90433600 | 2.35792600  | -1.10789300 |
| H  | -0.48052500 | 4.44798700  | -1.32951400 |
| C  | -1.91778600 | 1.36055800  | -1.24705800 |
| H  | -3.97002200 | 0.94033000  | -1.74134200 |
| O  | 0.32139600  | 2.10726000  | -0.71727700 |
| C  | -1.62890200 | -0.02582200 | -1.02219800 |
| Co | 0.93633400  | 0.54566600  | 0.11961800  |
| N  | -0.52501500 | -0.47503000 | -0.53153900 |
| H  | -2.40729600 | -0.73777500 | -1.28513400 |
| N  | 1.98935300  | -0.96614900 | -0.53699200 |
| C  | -0.21465800 | -1.89649100 | -0.37714900 |
| C  | 3.28341100  | -1.04194800 | -0.47097800 |
| C  | 1.15802600  | -2.07276400 | -1.04988000 |
| C  | -1.24252800 | -2.89746600 | -0.88967600 |
| H  | 3.77069100  | -1.94897900 | -0.83496000 |
| C  | 4.15625600  | -0.04221700 | 0.05075500  |
| C  | 1.69001600  | -3.48881500 | -0.82024800 |
| C  | -0.71270100 | -4.32138500 | -0.66443500 |
| H  | -1.42571500 | -2.73511700 | -1.96089900 |
| H  | -2.18618900 | -2.75104900 | -0.35742400 |
| C  | 5.55218000  | -0.29438000 | 0.00674200  |
| C  | 3.67278000  | 1.17887300  | 0.63285700  |
| C  | 0.66422200  | -4.52442700 | -1.31019400 |
| H  | 2.63982800  | -3.64204700 | -1.34306100 |
| H  | 1.88291100  | -3.62298500 | 0.25204900  |
| H  | -1.42695300 | -5.05002200 | -1.06137000 |
| H  | -0.64080000 | -4.50788300 | 0.41479300  |
| C  | 6.46584900  | 0.60671300  | 0.50377200  |
| H  | 5.89058700  | -1.22840700 | -0.43574600 |
| C  | 4.64326400  | 2.08687600  | 1.14257100  |
| O  | 2.42057000  | 1.51266600  | 0.73250300  |
| H  | 0.56792400  | -4.44275300 | -2.40141900 |
| H  | 1.03670200  | -5.53348500 | -1.10452900 |
| C  | 5.99160100  | 1.80796000  | 1.07578800  |
| H  | 7.52950100  | 0.40039100  | 0.46011900  |
| H  | 4.27439000  | 3.00843200  | 1.57941300  |
| H  | 6.70223400  | 2.52814700  | 1.47213500  |
| Cl | -4.57538200 | -1.29684300 | 0.41972100  |
| C  | -4.33497500 | -0.36003500 | 1.99560800  |
| C  | -2.90375400 | 0.13443600  | 2.11348200  |
| O  | -2.00182300 | -0.93596400 | 2.14734100  |
| H  | -4.52620300 | -1.11069900 | 2.76461800  |
| H  | -2.87470400 | 0.72562300  | 3.04792900  |
| H  | -2.69716800 | 0.83391000  | 1.29032900  |
| C  | -5.34915400 | 0.77144300  | 2.03889800  |
| H  | -6.36840800 | 0.39410400  | 1.93552200  |
| H  | -5.26964300 | 1.29654500  | 2.99718200  |
| H  | -5.15919200 | 1.48898500  | 1.23517400  |

|   |             |             |             |
|---|-------------|-------------|-------------|
| H | 1.02002300  | -1.90811200 | -2.12940700 |
| H | -0.08202200 | -2.05507500 | 0.69920400  |
| O | 0.36754700  | 0.21194000  | 1.84949500  |
| H | 0.91936100  | 0.74083600  | 2.44157500  |
| H | -1.09524800 | -0.53657900 | 2.14762100  |

five-coordinated Co<sup>III</sup>(salen)-OAc counterion addition in the terminal carbon and subsequent hydrolysis

**Co<sup>III</sup>(salen)-OAc counterion addition in the terminal carbon**

Co<sup>III</sup>(salen)-OAc + PO = Co<sup>III</sup>(salen)-PO~OAc

Charge: 0

Spin Multiplicity: 3

Sum of electronic and thermal Free Energies (a.u.): -1600.578263

Thermal correction to Gibbs Free Energy (a.u.): 0.439796

Imaginary frequencies: -405.25

Calculation of single point energy based on the optimized structure, Et = -2839.3258081 a.u.

|    |             |             |             |
|----|-------------|-------------|-------------|
| C  | 3.47499500  | -4.12794700 | -1.08590700 |
| C  | 4.45246900  | -3.11229700 | -1.10170900 |
| C  | 2.12826900  | -3.82529500 | -1.01814000 |
| H  | 3.78416900  | -5.16882000 | -1.12213900 |
| C  | 4.04735700  | -1.79424000 | -1.05810900 |
| H  | 5.50593100  | -3.36537400 | -1.14792600 |
| C  | 1.68870900  | -2.47917100 | -0.94864300 |
| H  | 1.37016000  | -4.60050900 | -0.99822100 |
| C  | 2.67714200  | -1.45013200 | -0.99155700 |
| H  | 4.78100800  | -0.99254500 | -1.07107900 |
| O  | 0.40470500  | -2.25173900 | -0.84065600 |
| C  | 2.31588400  | -0.06845500 | -0.98352200 |
| Co | -0.46405400 | -0.61652200 | -0.69987000 |
| N  | 1.10728800  | 0.39543900  | -0.99713700 |
| H  | 3.13829600  | 0.64146600  | -0.97580500 |
| N  | -1.39755100 | 1.02049500  | -1.06467400 |
| C  | 0.83172800  | 1.82619300  | -0.79943700 |
| C  | -2.64533200 | 1.22171800  | -0.78177000 |
| C  | -0.49560400 | 2.09447600  | -1.51676400 |
| C  | 1.92377400  | 2.79967200  | -1.23604100 |
| H  | -3.04897800 | 2.22820300  | -0.89258100 |
| C  | -3.56389500 | 0.22175600  | -0.33935800 |
| C  | -0.97146200 | 3.52909400  | -1.29271000 |
| C  | 1.44791900  | 4.24467900  | -1.02719100 |
| H  | 2.17417400  | 2.63176900  | -2.29267200 |
| H  | 2.82530600  | 2.62906500  | -0.64271700 |
| C  | -4.87630200 | 0.61561200  | 0.01548500  |
| C  | -3.20637500 | -1.16338300 | -0.31327000 |
| C  | 0.11805600  | 4.51635100  | -1.73850600 |
| H  | -1.89461900 | 3.72418700  | -1.84910500 |
| H  | -1.19168400 | 3.67121200  | -0.22675200 |
| H  | 2.21617600  | 4.94144100  | -1.37794800 |
| H  | 1.32636000  | 4.42620000  | 0.04836600  |
| C  | -5.82273500 | -0.31000800 | 0.40093700  |
| H  | -5.12512600 | 1.67350800  | -0.01581800 |
| C  | -4.20646200 | -2.09654200 | 0.06392400  |
| O  | -2.02564000 | -1.62018400 | -0.63441100 |
| H  | 0.25975000  | 4.43000900  | -2.82427100 |
| H  | -0.21529900 | 5.54148300  | -1.54666600 |
| C  | -5.47345500 | -1.67634300 | 0.41877800  |
| H  | -6.82141100 | 0.00479600  | 0.68277900  |
| H  | -3.93024100 | -3.14512300 | 0.07395300  |
| H  | -6.21305100 | -2.41349400 | 0.71850600  |
| C  | -0.47363600 | -1.28020700 | 2.11479300  |
| C  | 0.93784200  | -0.98908400 | 2.40852700  |
| O  | -0.42000500 | -0.18260800 | 1.21252700  |
| H  | -0.64128300 | -2.23289600 | 1.59728200  |
| H  | 1.71075600  | -1.48644600 | 1.83876000  |
| H  | 1.22559200  | -0.41268200 | 3.28651700  |
| C  | -1.48672100 | -1.05766600 | 3.22015100  |
| H  | -2.49386200 | -1.04402000 | 2.79145900  |
| H  | -1.43646600 | -1.86013500 | 3.96473200  |
| H  | -1.29763900 | -0.10145200 | 3.71567100  |
| H  | -0.33273100 | 1.93742600  | -2.59365600 |



|   |            |            |            |
|---|------------|------------|------------|
| H | 0.68146400 | 1.92324500 | 0.28309900 |
| C | 3.23921100 | 2.77412400 | 2.39632200 |
| H | 2.60127000 | 3.52706500 | 1.91856700 |
| H | 4.05720600 | 2.54605500 | 1.70660700 |
| H | 3.63463900 | 3.19274300 | 3.32337600 |
| C | 2.40532900 | 1.51650700 | 2.69080700 |
| O | 2.16853100 | 0.78248500 | 1.65935300 |
| O | 2.01131100 | 1.31101000 | 3.84997700 |

**Co<sup>III</sup>(salen)-OAc counterion addition in the terminal carbon**

Co<sup>III</sup>(salen)-OAc + PO = Co<sup>III</sup>(salen)-PO~OAc

Charge: 0

Spin Multiplicity: 3

Sum of electronic and thermal Free Energies (a.u.): -1600.624810

Thermal correction to Gibbs Free Energy (a.u.): 0.439721

No imaginary frequency

Calculation of single point energy based on the optimized structure, Er = -2839.3717294 a.u.

|    |             |             |             |
|----|-------------|-------------|-------------|
| C  | 2.81253500  | -4.65549700 | -0.78514400 |
| C  | 3.92610600  | -3.79180200 | -0.79895300 |
| C  | 1.52267600  | -4.15818400 | -0.77699100 |
| H  | 2.96805300  | -5.73058500 | -0.77342600 |
| C  | 3.71977100  | -2.42699800 | -0.81739400 |
| H  | 4.93224300  | -4.19652400 | -0.79220600 |
| C  | 1.28989200  | -2.76148300 | -0.77806900 |
| H  | 0.65823000  | -4.81279300 | -0.75641700 |
| C  | 2.41367600  | -1.88725000 | -0.82253900 |
| H  | 4.55997700  | -1.73914900 | -0.81662700 |
| O  | 0.04754300  | -2.34129900 | -0.72044500 |
| C  | 2.25834900  | -0.46837300 | -0.86878500 |
| Co | -0.58211100 | -0.60766500 | -0.73646500 |
| N  | 1.12137000  | 0.16438700  | -0.93226000 |
| H  | 3.16725200  | 0.11869300  | -0.85012500 |
| N  | -1.25205700 | 1.15709200  | -0.99066300 |
| C  | 1.08253600  | 1.62866600  | -0.78287800 |
| C  | -2.44541000 | 1.53162100  | -0.65564000 |
| C  | -0.21082700 | 2.09892900  | -1.44540000 |
| C  | 2.28650100  | 2.40921300  | -1.30772600 |
| H  | -2.68478000 | 2.59372800  | -0.69487500 |
| C  | -3.50225700 | 0.65509000  | -0.25679100 |
| C  | -0.45808000 | 3.58053200  | -1.16541400 |
| C  | 2.05827600  | 3.90257400  | -1.02679100 |
| H  | 2.42305300  | 2.22699300  | -2.38391800 |
| H  | 3.18453200  | 2.08430100  | -0.77966400 |
| C  | -4.72888100 | 1.21223300  | 0.17118200  |
| C  | -3.36776800 | -0.76441300 | -0.36313500 |
| C  | 0.74861500  | 4.40452800  | -1.64490400 |
| H  | -1.36588700 | 3.92908900  | -1.67133100 |
| H  | -0.59668700 | 3.71891000  | -0.08611600 |
| H  | 2.90202500  | 4.48642000  | -1.41001000 |
| H  | 2.03161000  | 4.03429500  | 0.06084600  |
| C  | -5.80105900 | 0.40917300  | 0.50358400  |
| H  | -4.81158900 | 2.29386700  | 0.23952100  |
| C  | -4.49286000 | -1.56590600 | -0.04508200 |
| O  | -2.27134600 | -1.36087800 | -0.75515900 |
| H  | 0.80981800  | 4.34426700  | -2.74051900 |
| H  | 0.58712100  | 5.45913300  | -1.39772500 |
| C  | -5.67228600 | -0.98983400 | 0.38743500  |
| H  | -6.73333800 | 0.84692200  | 0.84295400  |
| H  | -4.38423900 | -2.64054000 | -0.14169400 |
| H  | -6.51409900 | -1.62754400 | 0.64159300  |
| C  | -0.62518000 | -1.40134900 | 2.26704600  |
| C  | 0.36528900  | -0.31753000 | 2.31462700  |
| O  | -0.73686700 | -0.27142700 | 1.35047800  |
| H  | -0.34322100 | -2.31463100 | 1.74735000  |
| H  | 1.35345000  | -0.41523800 | 1.87052000  |
| H  | 0.28420800  | 0.46433000  | 3.06217300  |
| C  | -1.76327400 | -1.51435600 | 3.24083500  |
| H  | -2.66447600 | -1.86945500 | 2.73064500  |
| H  | -1.51271000 | -2.22832100 | 4.03247700  |
| H  | -1.97932700 | -0.54522900 | 3.69803500  |

|   |             |            |             |
|---|-------------|------------|-------------|
| H | -0.12106100 | 1.94797900 | -2.53239800 |
| H | 1.03959700  | 1.82046800 | 0.30884600  |
| C | 4.01706200  | 2.31003400 | 2.91205500  |
| H | 4.66179300  | 2.95820600 | 2.30615000  |
| H | 4.64380300  | 1.51179200 | 3.31793500  |
| H | 3.59313500  | 2.91245300 | 3.71868200  |
| C | 2.91071800  | 1.72907900 | 2.01640200  |
| O | 3.21868500  | 0.70267500 | 1.33747200  |
| O | 1.80180900  | 2.33500300 | 2.00829900  |

**Co<sup>III</sup>(salen)-OAc counterion addition in the terminal carbon**

Co<sup>III</sup>(salen)-OAc + PO = Co<sup>III</sup>(salen)-PO~OAc

Charge: 0

Spin Multiplicity: 3

Sum of electronic and thermal Free Energies (a.u.): -1600.660799

Thermal correction to Gibbs Free Energy (a.u.): 0.443593

No imaginary frequency

Calculation of single point energy based on the optimized structure, Ep = -2839.4080301 a.u.

|    |             |             |             |
|----|-------------|-------------|-------------|
| C  | 3.14224200  | -4.44078900 | -0.89773000 |
| C  | 4.01830200  | -3.56177100 | -1.57366400 |
| C  | 1.92819300  | -4.00902400 | -0.40709600 |
| H  | 3.43194300  | -5.47869400 | -0.75770600 |
| C  | 3.64089100  | -2.24874200 | -1.74237700 |
| H  | 4.97157100  | -3.91765100 | -1.94864600 |
| C  | 1.50946900  | -2.65733900 | -0.56194500 |
| H  | 1.25540900  | -4.67779500 | 0.11839800  |
| C  | 2.39593200  | -1.77051200 | -1.26102000 |
| H  | 4.29781500  | -1.55008100 | -2.25534400 |
| O  | 0.37301900  | -2.30077900 | -0.04344700 |
| C  | 2.07085500  | -0.39595800 | -1.44883500 |
| Co | -0.57455900 | -0.69500200 | -0.33861200 |
| N  | 0.93214500  | 0.15165500  | -1.15445000 |
| H  | 2.85791100  | 0.23504500  | -1.86295500 |
| N  | -1.55812400 | 0.82774000  | -1.01377800 |
| C  | 0.70677600  | 1.60038600  | -1.17186100 |
| C  | -2.81201200 | 1.03600200  | -0.78649000 |
| C  | -0.70971000 | 1.79429000  | -1.72939800 |
| C  | 1.73071000  | 2.46118800  | -1.90501900 |
| H  | -3.25279900 | 1.98304300  | -1.10140800 |
| C  | -3.70727800 | 0.10105600  | -0.17583600 |
| C  | -1.13206000 | 3.26262100  | -1.64586900 |
| C  | 1.31277300  | 3.93699700  | -1.82528100 |
| H  | 1.80442900  | 2.14858100  | -2.95577200 |
| H  | 2.72051400  | 2.33409500  | -1.45447300 |
| C  | -5.03846900 | 0.50506800  | 0.07711100  |
| C  | -3.30954100 | -1.24638700 | 0.08979000  |
| C  | -0.10594400 | 4.15183200  | -2.36484000 |
| H  | -2.11862300 | 3.41192900  | -2.09614800 |
| H  | -1.20833700 | 3.54693100  | -0.58868400 |
| H  | 2.02707400  | 4.55724500  | -2.37671300 |
| H  | 1.35560500  | 4.26250700  | -0.77765700 |
| C  | -5.97130500 | -0.37382400 | 0.58875100  |
| H  | -5.31663100 | 1.53390100  | -0.13945600 |
| C  | -4.29465500 | -2.13573000 | 0.58942000  |
| O  | -2.10598000 | -1.71278300 | -0.11852600 |
| H  | -0.12267700 | 3.92364500  | -3.43911600 |
| H  | -0.39571100 | 5.20301300  | -2.26442100 |
| C  | -5.58399800 | -1.70534100 | 0.83923700  |
| H  | -6.98652500 | -0.04910700 | 0.78894300  |
| H  | -3.98969600 | -3.15889900 | 0.77971700  |
| H  | -6.31072000 | -2.40846200 | 1.23690600  |
| C  | 0.26524400  | -0.26309000 | 2.39998900  |
| C  | 1.78698000  | -0.27711200 | 2.17946900  |
| O  | -0.39219900 | 0.25604100  | 1.28346700  |
| H  | -0.00737800 | -1.31993100 | 2.57266600  |
| H  | 2.04313600  | -0.98818300 | 1.39675000  |
| H  | 2.32233500  | -0.52077200 | 3.09935000  |
| C  | -0.14150800 | 0.55630700  | 3.62822800  |
| H  | -1.22411200 | 0.48829800  | 3.76528200  |
| H  | 0.35884900  | 0.20241300  | 4.53512700  |

|   |             |            |             |
|---|-------------|------------|-------------|
| H | 0.11595000  | 1.60928300 | 3.48137400  |
| H | -0.69283700 | 1.48642500 | -2.78654600 |
| H | 0.68165200  | 1.88016700 | -0.11071500 |
| C | 3.16738600  | 3.15746200 | 1.88242900  |
| H | 2.24043300  | 3.67573300 | 1.61617800  |
| H | 3.72219000  | 2.97726700 | 0.95764300  |
| H | 3.75154500  | 3.78211300 | 2.55723800  |
| C | 2.83076500  | 1.84936500 | 2.56303500  |
| O | 2.25580500  | 1.00335400 | 1.68441300  |
| O | 3.03965300  | 1.60110400 | 3.73023300  |

**subsequent hydrolysis (H<sub>2</sub>O molecule is opposite the counterion OAc)**

Co<sup>III</sup>(salen)-PO~OAc + H<sub>2</sub>O = Co<sup>III</sup>(salen)-OH + CH<sub>3</sub>CHOHCH<sub>2</sub>OAc

Charge: 0

Spin Multiplicity: 3

Sum of electronic and thermal Free Energies (a.u.): -1677.063964

Thermal correction to Gibbs Free Energy (a.u.): 0.465454

Imaginary frequencies: -645.48

Calculation of single point energy based on the optimized structure, Et = -2915.8640066 a.u.

|    |             |             |             |
|----|-------------|-------------|-------------|
| C  | -0.46642600 | 5.19974900  | -0.81213800 |
| C  | -1.16028700 | 4.82521100  | -1.98070800 |
| C  | 0.04388000  | 4.25315000  | 0.05467800  |
| H  | -0.32918600 | 6.25369100  | -0.58616900 |
| C  | -1.32944500 | 3.48341600  | -2.24954300 |
| H  | -1.55691400 | 5.57943600  | -2.65132500 |
| C  | -0.10291000 | 2.86401000  | -0.19792700 |
| H  | 0.57220600  | 4.53877700  | 0.95767300  |
| C  | -0.80640400 | 2.48504300  | -1.39400700 |
| H  | -1.87120000 | 3.16733400  | -3.13793800 |
| O  | 0.34927600  | 2.02222600  | 0.69305500  |
| C  | -1.08323700 | 1.11092800  | -1.69665300 |
| Co | 0.85620000  | 0.26113200  | 0.25183400  |
| N  | -0.52584500 | 0.11269600  | -1.09735200 |
| H  | -1.83723100 | 0.91337600  | -2.46198000 |
| N  | 1.33366300  | -1.48445400 | -0.37393900 |
| C  | -0.94966500 | -1.28370700 | -1.17631500 |
| C  | 2.54134800  | -1.95223700 | -0.32204600 |
| C  | 0.32573200  | -2.12941800 | -1.24012000 |
| C  | -1.93240700 | -1.70067400 | -2.26182800 |
| H  | 2.71451500  | -2.96516000 | -0.69623500 |
| C  | 3.69467500  | -1.21071900 | 0.07874600  |
| C  | -0.01983100 | -3.58504200 | -0.92343500 |
| C  | -2.28434800 | -3.18438600 | -2.04312300 |
| H  | -1.49717800 | -1.55034600 | -3.25934600 |
| H  | -2.84144900 | -1.09398500 | -2.20013100 |
| C  | 4.91184100  | -1.89000800 | 0.31076200  |
| C  | 3.66607800  | 0.22483400  | 0.06162700  |
| C  | -1.04021500 | -4.08413700 | -1.96227800 |
| H  | 0.87391200  | -4.21766900 | -0.94409100 |
| H  | -0.43328900 | -3.63335300 | 0.09050500  |
| H  | -2.94798800 | -3.53434500 | -2.84095100 |
| H  | -2.84620400 | -3.26849300 | -1.10514800 |
| C  | 6.08050400  | -1.19876700 | 0.55696700  |
| H  | 4.90988800  | -2.97728900 | 0.29978100  |
| C  | 4.89149200  | 0.90582700  | 0.28287900  |
| O  | 2.59134500  | 0.92175400  | -0.18336900 |
| H  | -0.55385900 | -4.11743400 | -2.94670200 |
| H  | -1.33876300 | -5.11122600 | -1.72745700 |
| C  | 6.05849300  | 0.21123400  | 0.53540400  |
| H  | 7.00565900  | -1.72968800 | 0.75330900  |
| H  | 4.86859400  | 1.98994200  | 0.25900600  |
| H  | 6.97704600  | 0.76232500  | 0.71769300  |
| H  | 0.71649900  | -2.07618100 | -2.26746500 |
| H  | -1.40562800 | -1.46642100 | -0.19735900 |
| O  | 1.55957600  | -0.10055000 | 2.17102000  |
| H  | 1.59498100  | 0.78039500  | 2.56906700  |
| H  | 0.47472900  | -0.46587800 | 2.20652900  |
| C  | -1.63618100 | 0.09189700  | 2.35963500  |
| C  | -2.65494400 | 0.73784300  | 1.42202200  |
| O  | -0.66050400 | -0.64579800 | 1.66758100  |

|   |             |             |             |
|---|-------------|-------------|-------------|
| H | -1.17252100 | 0.95159800  | 2.88145900  |
| H | -2.15021800 | 1.38252300  | 0.70760300  |
| H | -3.39065300 | 1.31127400  | 1.98854500  |
| C | -2.30402200 | -0.80821300 | 3.40374400  |
| H | -1.55284000 | -1.17931400 | 4.10648300  |
| H | -3.08499200 | -0.27954900 | 3.95904400  |
| H | -2.75532900 | -1.67446900 | 2.91015300  |
| C | -5.17042300 | -1.66545700 | 0.11403800  |
| H | -6.23934900 | -1.77352700 | 0.29460400  |
| H | -4.66612700 | -2.60551400 | 0.35956200  |
| H | -4.98262900 | -1.45598400 | -0.94194200 |
| C | -4.62110100 | -0.56200600 | 0.98803200  |
| O | -3.35577100 | -0.25402100 | 0.62534000  |
| O | -5.22639500 | -0.03527700 | 1.89540500  |

**subsequent hydrolysis (H<sub>2</sub>O molecule is opposite the counterion OAc)**

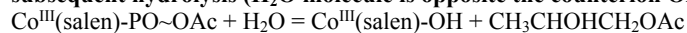

Charge: 0

Spin Multiplicity: 3

Sum of electronic and thermal Free Energies (a.u.): -1677.090804

Thermal correction to Gibbs Free Energy (a.u.): 0.469169

No imaginary frequency

Calculation of single point energy based on the optimized structure, Er = -2915.8966966 a.u.

|    |             |             |             |
|----|-------------|-------------|-------------|
| C  | -4.13790900 | 3.85219300  | -0.45399600 |
| C  | -4.92152000 | 2.80303600  | -0.98486600 |
| C  | -2.79514600 | 3.68290500  | -0.18935800 |
| H  | -4.60252700 | 4.81225900  | -0.24666100 |
| C  | -4.32279500 | 1.59031000  | -1.24146600 |
| H  | -5.97706800 | 2.95299200  | -1.18293300 |
| C  | -2.14885300 | 2.44070600  | -0.43944600 |
| H  | -2.18960100 | 4.48268400  | 0.22250700  |
| C  | -2.94331300 | 1.38097900  | -0.98841200 |
| H  | -4.90384800 | 0.76538800  | -1.64675500 |
| O  | -0.88764400 | 2.33075100  | -0.14345600 |
| C  | -2.38465200 | 0.09907800  | -1.25953300 |
| Co | 0.27699200  | 0.90889300  | -0.53650400 |
| N  | -1.13211800 | -0.22248900 | -1.14322300 |
| H  | -3.08511900 | -0.67223500 | -1.57923700 |
| N  | 1.43389900  | -0.44054500 | -1.28486100 |
| C  | -0.65384700 | -1.60760700 | -1.26948500 |
| C  | 2.70249000  | -0.48844700 | -1.05323000 |
| C  | 0.70380100  | -1.51401400 | -1.97793000 |
| C  | -1.58066800 | -2.60813800 | -1.95406700 |
| H  | 3.25807700  | -1.37525100 | -1.35598500 |
| C  | 3.46256200  | 0.56591000  | -0.45152100 |
| C  | 1.39309000  | -2.87762300 | -2.03803300 |
| C  | -0.89436800 | -3.98167300 | -2.01218500 |
| H  | -1.82462900 | -2.26402100 | -2.96880800 |
| H  | -2.52169700 | -2.69319700 | -1.40033700 |
| C  | 4.83084100  | 0.34564300  | -0.17709000 |
| C  | 2.89269200  | 1.85814100  | -0.23286700 |
| C  | 0.46762600  | -3.90247600 | -2.71104500 |
| H  | 2.32938000  | -2.80927600 | -2.60298600 |
| H  | 1.63046400  | -3.18164000 | -1.01238600 |
| H  | -1.54483800 | -4.69816100 | -2.52490400 |
| H  | -0.75507300 | -4.35155600 | -0.98896200 |
| C  | 5.63599600  | 1.35501500  | 0.31255400  |
| H  | 5.24182400  | -0.64455800 | -0.35836800 |
| C  | 3.74740900  | 2.88512500  | 0.23738100  |
| O  | 1.63668000  | 2.15440600  | -0.46029700 |
| H  | 0.31884300  | -3.62577500 | -3.76403100 |
| H  | 0.94947100  | -4.88577900 | -2.71135900 |
| C  | 5.07909100  | 2.63311600  | 0.51209900  |
| H  | 6.68203500  | 1.17074300  | 0.53182700  |
| H  | 3.31108600  | 3.86619000  | 0.38948400  |
| H  | 5.70460100  | 3.43699400  | 0.89021200  |
| H  | 0.51481700  | -1.15376000 | -3.00122200 |
| H  | -0.47193100 | -1.93933000 | -0.24290400 |
| O  | 1.36046100  | -2.48007000 | 1.23124600  |
| H  | 1.96274300  | -2.53978500 | 1.98157200  |

|   |             |             |            |
|---|-------------|-------------|------------|
| H | 1.05283900  | -1.53095900 | 1.23189300 |
| C | -0.13844100 | 0.49016400  | 2.32114800 |
| C | -1.60953900 | 0.02732100  | 2.31965200 |
| O | 0.51020900  | 0.03779000  | 1.16339600 |
| H | -0.17714400 | 1.59174300  | 2.33674800 |
| H | -2.17885600 | 0.61084600  | 1.59673700 |
| H | -2.06157700 | 0.11746000  | 3.31009700 |
| C | 0.64841600  | 0.01910100  | 3.54814000 |
| H | 1.66245400  | 0.42712200  | 3.50086100 |
| H | 0.17505000  | 0.35008600  | 4.47752900 |
| H | 0.70934500  | -1.07137600 | 3.57566600 |
| C | -1.60540400 | -3.66804900 | 2.10567800 |
| H | -1.82581700 | -4.45877900 | 2.82242600 |
| H | -0.57677000 | -3.76240500 | 1.73797700 |
| H | -2.28274600 | -3.72610300 | 1.24969300 |
| C | -1.69779900 | -2.32374700 | 2.78022700 |
| O | -1.73217500 | -1.33653500 | 1.85625400 |
| O | -1.69923200 | -2.13650200 | 3.97794600 |

**subsequent hydrolysis (H<sub>2</sub>O molecule is opposite the counterion OAc)**

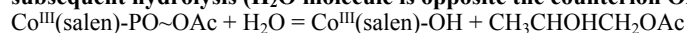

Charge: 0

Spin Multiplicity: 3

Sum of electronic and thermal Free Energies (a.u.): -1677.091716

Thermal correction to Gibbs Free Energy (a.u.): 0.468406

No imaginary frequency

Calculation of single point energy based on the optimized structure, Ep = -2915.8967308 a.u.

|    |             |             |             |
|----|-------------|-------------|-------------|
| C  | 1.33877500  | 5.84783500  | 0.46509700  |
| C  | -0.01581700 | 5.93898600  | 0.09008000  |
| C  | 1.99698700  | 4.63174100  | 0.48805800  |
| H  | 1.87936400  | 6.74903400  | 0.74117300  |
| C  | -0.68742100 | 4.78572200  | -0.26413100 |
| H  | -0.51914400 | 6.89948000  | 0.07465900  |
| C  | 1.32445400  | 3.43066800  | 0.15124000  |
| H  | 3.04042300  | 4.55530300  | 0.77351800  |
| C  | -0.04714900 | 3.52649300  | -0.23630500 |
| H  | -1.72991100 | 4.83044600  | -0.57060200 |
| O  | 1.99396700  | 2.30689300  | 0.19443800  |
| C  | -0.76837800 | 2.37451100  | -0.68765300 |
| Co | 1.30792100  | 0.56781400  | 0.11919600  |
| N  | -0.33474700 | 1.15924200  | -0.65274400 |
| H  | -1.75254400 | 2.55819400  | -1.11929400 |
| N  | 1.16495800  | -0.86444800 | -1.18978400 |
| C  | -1.06679500 | 0.02098200  | -1.21695700 |
| C  | 1.94960300  | -1.89800900 | -1.22186800 |
| C  | -0.03417500 | -0.76330100 | -2.04472900 |
| C  | -2.32205500 | 0.32649700  | -2.02538400 |
| H  | 1.71698600  | -2.70383200 | -1.91877800 |
| C  | 3.11177200  | -2.09731700 | -0.42021500 |
| C  | -0.63836800 | -2.08673800 | -2.51891200 |
| C  | -2.93265300 | -0.99645000 | -2.51048000 |
| H  | -2.08107300 | 0.97055400  | -2.88267100 |
| H  | -3.04555000 | 0.85658500  | -1.39964500 |
| C  | 3.84980300  | -3.29417600 | -0.60713400 |
| C  | 3.55461700  | -1.13410900 | 0.54522500  |
| C  | -1.92471600 | -1.82315800 | -3.31664600 |
| H  | 0.06771600  | -2.63730900 | -3.14936600 |
| H  | -0.85374300 | -2.69688200 | -1.63371800 |
| H  | -3.82726100 | -0.79769800 | -3.11077900 |
| H  | -3.25004300 | -1.57236700 | -1.63321800 |
| C  | 4.99331500  | -3.55662000 | 0.11306900  |
| H  | 3.48893800  | -4.01025400 | -1.34149200 |
| C  | 4.74261200  | -1.43010800 | 1.26884100  |
| O  | 2.95226000  | -0.00880300 | 0.80021200  |
| H  | -1.67443900 | -1.28886000 | -4.24341100 |
| H  | -2.37141900 | -2.77700500 | -3.61627000 |
| C  | 5.43517000  | -2.60378100 | 1.05669700  |
| H  | 5.54632900  | -4.47675800 | -0.03967900 |
| H  | 5.07727800  | -0.69485600 | 1.99240500  |
| H  | 6.33745700  | -2.79795900 | 1.63016000  |

|   |             |             |             |
|---|-------------|-------------|-------------|
| H | 0.24154000  | -0.14762400 | -2.91488600 |
| H | -1.34430800 | -0.62212700 | -0.37671100 |
| O | 0.41224900  | -0.03216600 | 1.65342600  |
| H | 1.12415000  | -0.21715200 | 2.28406500  |
| H | -0.37655000 | -1.47651700 | 1.26998000  |
| C | -2.01650400 | -2.29436200 | 1.96211700  |
| C | -2.67768900 | -0.93482500 | 2.21166200  |
| O | -0.97883900 | -2.21823600 | 0.99829200  |
| H | -1.59888800 | -2.58783900 | 2.94208700  |
| H | -1.90554000 | -0.17185500 | 2.32777900  |
| H | -3.31467700 | -0.98113900 | 3.09651800  |
| C | -2.99751400 | -3.36748200 | 1.51048900  |
| H | -2.48071800 | -4.32584700 | 1.41613100  |
| H | -3.82557700 | -3.46833000 | 2.21618400  |
| H | -3.40826600 | -3.10674700 | 0.53012700  |
| C | -5.54274500 | -0.09877900 | -0.00598100 |
| H | -6.61820000 | -0.13643000 | 0.16299800  |
| H | -5.28867500 | -0.69919200 | -0.88372400 |
| H | -5.23075000 | 0.92961900  | -0.20740600 |
| C | -4.82900400 | -0.63517800 | 1.21242800  |
| O | -3.48810700 | -0.49692000 | 1.08797600  |
| O | -5.38215900 | -1.12119700 | 2.17460900  |

**subsequent hydrolysis (H<sub>2</sub>O molecule is at the same side with the ion OAc)**

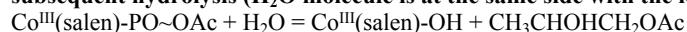

Charge: 0

Spin Multiplicity: 3

Sum of electronic and thermal Free Energies (a.u.): -1677.065275

Thermal correction to Gibbs Free Energy (a.u.): 0.466537

Imaginary frequencies: -750.48

Calculation of single point energy based on the optimized structure, Et = -2915.8642924 a.u.

|    |             |             |             |
|----|-------------|-------------|-------------|
| C  | 4.13047700  | 2.22445600  | -2.00414500 |
| C  | 3.47346000  | 3.42320300  | -2.34948200 |
| C  | 3.49804500  | 1.23875700  | -1.27071500 |
| H  | 5.15880800  | 2.06869400  | -2.31905300 |
| C  | 2.17212300  | 3.60965600  | -1.93303700 |
| H  | 3.98509700  | 4.18561100  | -2.92679500 |
| C  | 2.15427700  | 1.39751700  | -0.83915900 |
| H  | 4.00766100  | 0.32543200  | -0.98530900 |
| C  | 1.48578100  | 2.61862500  | -1.19213300 |
| H  | 1.64570200  | 4.53046900  | -2.17400000 |
| O  | 1.63458200  | 0.45806400  | -0.09037900 |
| C  | 0.16077400  | 2.90284200  | -0.72620100 |
| Co | -0.22628000 | 0.10573200  | -0.00384100 |
| N  | -0.62461900 | 2.02137500  | -0.20520700 |
| H  | -0.18076800 | 3.93842000  | -0.80606600 |
| N  | -2.14131100 | -0.04557200 | -0.10499600 |
| C  | -1.87898300 | 2.29575100  | 0.48948800  |
| C  | -2.74204000 | -1.10704200 | -0.53530200 |
| C  | -2.87762800 | 1.22661900  | 0.02823700  |
| C  | -2.49800600 | 3.68587100  | 0.38183400  |
| H  | -3.83526000 | -1.10679300 | -0.55979300 |
| C  | -2.09075800 | -2.25498100 | -1.08824600 |
| C  | -4.08693000 | 1.21580700  | 0.96536700  |
| C  | -3.75544900 | 3.73184300  | 1.26992800  |
| H  | -2.75814600 | 3.90600600  | -0.66253200 |
| H  | -1.78699700 | 4.45177700  | 0.70997700  |
| C  | -2.83320900 | -3.43570600 | -1.30629400 |
| C  | -0.74567700 | -2.15875800 | -1.57105300 |
| C  | -4.74796600 | 2.60511600  | 0.94172500  |
| H  | -4.81210500 | 0.45284000  | 0.66372200  |
| H  | -3.74733600 | 0.96042900  | 1.97602200  |
| H  | -4.24768800 | 4.70486800  | 1.17003800  |
| H  | -3.44426200 | 3.64235700  | 2.31853500  |
| C  | -2.27667500 | -4.52264200 | -1.95216100 |
| H  | -3.85775800 | -3.47908200 | -0.94487400 |
| C  | -0.21193900 | -3.27570200 | -2.26041900 |
| O  | -0.00025100 | -1.09172600 | -1.43377800 |
| H  | -5.17224500 | 2.77756800  | -0.05674800 |
| H  | -5.58660100 | 2.62994100  | 1.64532700  |

|   |             |             |             |
|---|-------------|-------------|-------------|
| C | -0.95652900 | -4.42834600 | -2.43407600 |
| H | -2.84983900 | -5.43202700 | -2.09635000 |
| H | 0.80478100  | -3.19406500 | -2.62904800 |
| H | -0.51367700 | -5.27466000 | -2.95176200 |
| C | 0.53524400  | -2.75323100 | 1.41036000  |
| C | 1.97035600  | -2.40293100 | 1.03515000  |
| O | -0.33960000 | -1.65864900 | 1.30152600  |
| H | 0.22625000  | -3.51704400 | 0.67769100  |
| H | 2.01597800  | -1.99049200 | 0.02643500  |
| H | 2.62467200  | -3.27866900 | 1.09827000  |
| C | 0.43322900  | -3.35721200 | 2.81437100  |
| H | -0.60930700 | -3.59945500 | 3.03640200  |
| H | 1.03191100  | -4.27128400 | 2.89864700  |
| H | 0.78954300  | -2.64033300 | 3.55982400  |
| H | -3.21685900 | 1.50391300  | -0.98119400 |
| H | -1.64727700 | 2.08518400  | 1.54138400  |
| O | -0.10622600 | 0.50998200  | 2.08850100  |
| H | 0.84127000  | 0.68464400  | 2.17464300  |
| H | -0.16817100 | -0.66734000 | 1.99605600  |
| C | 3.89108200  | 0.38925100  | 2.48804600  |
| H | 3.41453100  | 0.31585300  | 3.46751700  |
| H | 3.47085200  | 1.25157000  | 1.95892900  |
| H | 4.96596700  | 0.53994000  | 2.59241500  |
| C | 3.62490700  | -0.83471000 | 1.64720600  |
| O | 2.44120100  | -1.39108600 | 1.95559800  |
| O | 4.36461600  | -1.25083000 | 0.77866600  |

**subsequent hydrolysis (H<sub>2</sub>O molecule is at the same side with the ion OAc)**

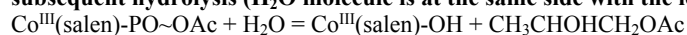

Charge: 0

Spin Multiplicity: 3

Sum of electronic and thermal Free Energies (a.u.): -1677.094813

Thermal correction to Gibbs Free Energy (a.u.): 0.468725

No imaginary frequency

Calculation of single point energy based on the optimized structure, Er = -2915.9033149 a.u.

|    |             |             |             |
|----|-------------|-------------|-------------|
| C  | -4.47647700 | 0.26256600  | -2.33958700 |
| C  | -4.74163500 | -1.05422700 | -1.91406100 |
| C  | -3.22572200 | 0.83011000  | -2.18032400 |
| H  | -5.26958400 | 0.84913600  | -2.79434800 |
| C  | -3.72646800 | -1.77999300 | -1.32168900 |
| H  | -5.72710200 | -1.48737000 | -2.04588400 |
| C  | -2.16833700 | 0.10778700  | -1.57281300 |
| H  | -3.02143700 | 1.84863700  | -2.48873400 |
| C  | -2.44070200 | -1.22346600 | -1.13409500 |
| H  | -3.90445600 | -2.79701200 | -0.98111500 |
| O  | -1.00473400 | 0.69518500  | -1.44868500 |
| C  | -1.41998600 | -2.03942100 | -0.54903900 |
| Co | 0.46438100  | 0.11208800  | -0.44371600 |
| N  | -0.20825700 | -1.66025000 | -0.31910500 |
| H  | -1.69808600 | -3.06327700 | -0.30792100 |
| N  | 2.19682100  | -0.77256800 | -0.54946100 |
| C  | 0.80296400  | -2.51875900 | 0.30058600  |
| C  | 3.33825900  | -0.15435800 | -0.53768800 |
| C  | 2.09422400  | -2.24290200 | -0.48771100 |
| C  | 0.48541100  | -4.00797500 | 0.39235900  |
| H  | 4.25222000  | -0.74962600 | -0.50484100 |
| C  | 3.52421200  | 1.25897000  | -0.55810900 |
| C  | 3.28190700  | -2.98743700 | 0.12386300  |
| C  | 1.67990200  | -4.75430000 | 1.00436700  |
| H  | 0.27030100  | -4.40478200 | -0.60929600 |
| H  | -0.40541400 | -4.15565600 | 1.01037400  |
| C  | 4.85100500  | 1.75876500  | -0.51027900 |
| C  | 2.42302300  | 2.17419900  | -0.64254900 |
| C  | 2.97204000  | -4.48948500 | 0.22273900  |
| H  | 4.18558300  | -2.84100200 | -0.47689000 |
| H  | 3.48330300  | -2.57755800 | 1.12229300  |
| H  | 1.46909000  | -5.82818500 | 1.03583900  |
| H  | 1.81030100  | -4.42876400 | 2.04451400  |
| C  | 5.11362000  | 3.10973000  | -0.54047600 |
| H  | 5.66788900  | 1.04366800  | -0.44669600 |

|   |             |             |             |
|---|-------------|-------------|-------------|
| C | 2.72681900  | 3.56343400  | -0.67911500 |
| O | 1.17286700  | 1.82375200  | -0.70297400 |
| H | 2.87538900  | -4.90372800 | -0.78991000 |
| H | 3.81456600  | -5.00711000 | 0.69296000  |
| C | 4.02991200  | 4.01142400  | -0.62730300 |
| H | 6.13275000  | 3.47780400  | -0.49869600 |
| H | 1.89038000  | 4.25022400  | -0.74834600 |
| H | 4.22480600  | 5.08005700  | -0.65257900 |
| C | -0.05784600 | 1.54612100  | 1.99771200  |
| C | -1.26239000 | 2.25381600  | 1.38171000  |
| O | 0.16733000  | 0.28615500  | 1.40258300  |
| H | 0.79483900  | 2.21590800  | 1.80299700  |
| H | -1.11172800 | 2.41341600  | 0.31390200  |
| H | -1.43628200 | 3.22097900  | 1.86438600  |
| C | -0.19931400 | 1.34520200  | 3.50916700  |
| H | 0.71408300  | 0.89533800  | 3.90806400  |
| H | -0.36815900 | 2.30034500  | 4.01841100  |
| H | -1.03281900 | 0.67262200  | 3.72502600  |
| H | 1.93505900  | -2.60281900 | -1.51542500 |
| H | 0.94800600  | -2.12216700 | 1.31451500  |
| O | -1.78287500 | -1.46587800 | 2.28970900  |
| H | -2.49785900 | -0.83525400 | 2.13631800  |
| H | -1.00969400 | -0.91392500 | 2.03929900  |
| C | -4.71004700 | 0.91636000  | 1.23503000  |
| H | -4.78644200 | 0.64394800  | 2.29167800  |
| H | -4.51660800 | 0.00552400  | 0.66163000  |
| H | -5.64368900 | 1.36242500  | 0.89465400  |
| C | -3.58043400 | 1.89453500  | 1.02523300  |
| O | -2.43498600 | 1.42243200  | 1.56501800  |
| O | -3.66523500 | 2.95802500  | 0.45141700  |

**subsequent hydrolysis (H<sub>2</sub>O molecule is at the same side with the ion OAc)**

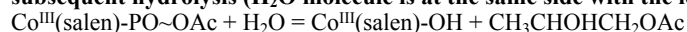

Charge: 0

Spin Multiplicity: 3

Sum of electronic and thermal Free Energies (a.u.): -1677.083433

Thermal correction to Gibbs Free Energy (a.u.): 0.469000

No imaginary frequency

Calculation of single point energy based on the optimized structure, Ep = -2915.8919409 a.u.

|    |             |             |             |
|----|-------------|-------------|-------------|
| C  | 3.94843600  | -3.20873200 | -1.57443200 |
| C  | 4.97279500  | -2.23540500 | -1.53567800 |
| C  | 2.64862300  | -2.90304100 | -1.22960300 |
| H  | 4.18915600  | -4.22349800 | -1.87949700 |
| C  | 4.65996100  | -0.95643400 | -1.13475600 |
| H  | 5.98890700  | -2.49700400 | -1.80998200 |
| C  | 2.29282500  | -1.58581800 | -0.82601400 |
| H  | 1.86132900  | -3.64869300 | -1.23500200 |
| C  | 3.33356500  | -0.59814300 | -0.78166200 |
| H  | 5.43211300  | -0.19233100 | -1.08270900 |
| O  | 1.05662900  | -1.36660400 | -0.48070100 |
| C  | 3.08094700  | 0.72089900  | -0.30314400 |
| Co | 0.22626900  | 0.30550200  | -0.29371500 |
| N  | 1.90378800  | 1.21042900  | -0.06059300 |
| H  | 3.95523900  | 1.34522800  | -0.10934100 |
| N  | -0.51101600 | 2.08668300  | -0.31702800 |
| C  | 1.66416900  | 2.46397400  | 0.65920600  |
| C  | -1.73156100 | 2.37847000  | -0.63601000 |
| C  | 0.48166400  | 3.14118700  | -0.04206200 |
| C  | 2.83638300  | 3.42804700  | 0.82317400  |
| H  | -2.05080300 | 3.41937500  | -0.56154100 |
| C  | -2.70179100 | 1.45956300  | -1.13605600 |
| C  | -0.00525500 | 4.33798700  | 0.77952300  |
| C  | 2.37617000  | 4.65568400  | 1.62623300  |
| H  | 3.20511700  | 3.73760400  | -0.16427300 |
| H  | 3.66690900  | 2.93907900  | 1.34324500  |
| C  | -4.03136400 | 1.89980300  | -1.32063000 |
| C  | -2.32839100 | 0.13979500  | -1.52795600 |
| C  | 1.15158700  | 5.32763100  | 0.99202200  |
| H  | -0.83182500 | 4.85047600  | 0.27815900  |
| H  | -0.38483800 | 3.97236800  | 1.74150400  |



|   |             |             |             |
|---|-------------|-------------|-------------|
| H | 3.19893800  | 5.37287600  | 1.71316700  |
| H | 2.12631000  | 4.33721400  | 2.64648200  |
| C | -4.98899800 | 1.07098500  | -1.86799400 |
| H | -4.29072800 | 2.91002900  | -1.01333600 |
| C | -3.31778400 | -0.67831200 | -2.12376500 |
| O | -1.11883400 | -0.34718600 | -1.39338100 |
| H | 1.43638800  | 5.75723900  | 0.02203000  |
| H | 0.81377100  | 6.16177100  | 1.61565400  |
| C | -4.61543600 | -0.22542900 | -2.27340100 |
| H | -6.01076800 | 1.41241500  | -1.99239500 |
| H | -3.02356700 | -1.67368400 | -2.43806000 |
| H | -5.35925100 | -0.88283700 | -2.71524200 |
| C | -3.10500500 | -1.80398500 | 1.54422800  |
| C | -2.08570500 | -2.69062800 | 0.82661000  |
| O | -2.87934900 | -0.41938000 | 1.38534200  |
| H | -4.05657600 | -2.00482700 | 1.03111100  |
| H | -1.85855300 | -2.30797600 | -0.16947300 |
| H | -2.45707100 | -3.71569300 | 0.74286100  |
| C | -3.25772400 | -2.18338100 | 3.02152300  |
| H | -4.03783500 | -1.56822400 | 3.47670400  |
| H | -3.52634500 | -3.23943300 | 3.14171400  |
| H | -2.32096000 | -2.00672300 | 3.55722200  |
| H | 0.84277700  | 3.50297000  | -1.01770300 |
| H | 1.30838200  | 2.14953400  | 1.65052000  |
| O | -0.23561900 | 0.10109900  | 1.52990200  |
| H | -0.06337900 | -0.83167000 | 1.73445700  |
| H | -1.93120600 | -0.19937800 | 1.55776900  |
| C | 1.34117200  | -3.47868700 | 2.00129100  |
| H | 1.10540000  | -3.61563100 | 3.06046200  |
| H | 1.76263500  | -2.47811500 | 1.87652500  |
| H | 2.06779800  | -4.22254500 | 1.67779200  |
| C | 0.08813300  | -3.60224800 | 1.16908700  |
| O | -0.84933300 | -2.72300500 | 1.58762000  |
| O | -0.08107200 | -4.38628900 | 0.26077300  |

five-coordinated Co<sup>III</sup>(salen)-OAc counterion addition in the middle carbon and subsequent hydrolysis

**Co<sup>III</sup>(salen)-OAc counterion addition in the middle carbon**

Co<sup>III</sup>(salen)-OAc + PO = Co<sup>III</sup>(salen)-PO~OAc

Charge: 0

Spin Multiplicity: 3

Sum of electronic and thermal Free Energies (a.u.): -1600.580947

Thermal correction to Gibbs Free Energy (a.u.): 0.439188

Imaginary frequencies: -328.79

Calculation of single point energy based on the optimized structure, Et = -2839.3288504 a.u.

|    |             |             |             |
|----|-------------|-------------|-------------|
| C  | 3.15844500  | -4.26170300 | -1.34277700 |
| C  | 4.13964000  | -3.27078000 | -1.53410100 |
| C  | 1.84606200  | -3.92529400 | -1.06023800 |
| H  | 3.43455100  | -5.31012600 | -1.41252300 |
| C  | 3.77341100  | -1.94141400 | -1.44729300 |
| H  | 5.16570600  | -3.54791500 | -1.74964900 |
| C  | 1.45494600  | -2.57035300 | -0.94045400 |
| H  | 1.08593500  | -4.68242200 | -0.90179600 |
| C  | 2.44260700  | -1.56702200 | -1.16109000 |
| H  | 4.51064200  | -1.15703300 | -1.59763800 |
| O  | 0.21135400  | -2.30904300 | -0.60873500 |
| C  | 2.10629000  | -0.17553800 | -1.13369400 |
| Co | -0.61538300 | -0.65982800 | -0.39545800 |
| N  | 0.91950600  | 0.30041400  | -0.96179600 |
| H  | 2.92275300  | 0.52308500  | -1.29624400 |
| N  | -1.58776000 | 0.90256900  | -0.97761600 |
| C  | 0.65142000  | 1.73978300  | -0.86758100 |
| C  | -2.84804300 | 1.10453500  | -0.75259500 |
| C  | -0.70789400 | 1.94164000  | -1.54933100 |
| C  | 1.71754800  | 2.67489800  | -1.42727000 |
| H  | -3.27441800 | 2.07128800  | -1.02203800 |
| C  | -3.75504600 | 0.16513500  | -0.17686400 |
| C  | -1.18294100 | 3.38835300  | -1.40953300 |
| C  | 1.24505400  | 4.12894600  | -1.28879000 |
| H  | 1.91093900  | 2.44020100  | -2.48348900 |

|   |             |             |             |
|---|-------------|-------------|-------------|
| H | 2.64565700  | 2.53576200  | -0.86870200 |
| C | -5.09862100 | 0.56660600  | 0.02691400  |
| C | -3.35488600 | -1.16858100 | 0.15630500  |
| C | -0.11610400 | 4.34897600  | -1.95857600 |
| H | -2.12442400 | 3.54544200  | -1.94666400 |
| H | -1.36914400 | 3.59938900  | -0.34863100 |
| H | 1.99229600  | 4.80512200  | -1.71685100 |
| H | 1.16960400  | 4.37678000  | -0.22228400 |
| C | -6.03716300 | -0.29983000 | 0.54325000  |
| H | -5.37767700 | 1.58471400  | -0.23344300 |
| C | -4.34708800 | -2.04471000 | 0.67138100  |
| O | -2.14786000 | -1.63626100 | -0.00063400 |
| H | -0.01775800 | 4.19516100  | -3.04176900 |
| H | -0.44884600 | 5.38271600  | -1.81834300 |
| C | -5.64543100 | -1.61755500 | 0.86210000  |
| H | -7.06067900 | 0.02205800  | 0.70036200  |
| H | -4.03903600 | -3.05612900 | 0.91258400  |
| H | -6.37822200 | -2.31005600 | 1.26690700  |
| C | 0.98644100  | -0.52021500 | 2.78277600  |
| C | -0.46321700 | -0.68338300 | 2.53812600  |
| O | -0.38067200 | 0.10463300  | 1.37434100  |
| H | 1.34881800  | 0.32889100  | 3.37030200  |
| H | -1.10908100 | -0.22525900 | 3.29829600  |
| H | -0.78254500 | -1.71794400 | 2.34903600  |
| C | 1.91349100  | -1.60640500 | 2.42252600  |
| H | 1.55996600  | -2.17624900 | 1.56229900  |
| H | 2.92858100  | -1.25081500 | 2.26373000  |
| H | 1.89714200  | -2.29760400 | 3.28499400  |
| H | -0.58616400 | 1.70515300  | -2.61724300 |
| H | 0.54644600  | 1.92572100  | 0.20754100  |
| C | 3.65940800  | 2.98491500  | 1.82345400  |
| H | 3.05484200  | 3.76125300  | 1.33943600  |
| H | 4.35502800  | 2.58894900  | 1.07784000  |
| H | 4.21019800  | 3.44556000  | 2.64573600  |
| C | 2.73259600  | 1.87910000  | 2.35508100  |
| O | 2.35380900  | 1.01447300  | 1.48661000  |
| O | 2.40042500  | 1.90971900  | 3.55606100  |

**Co<sup>III</sup>(salen)-OAc counterion addition in the middle carbon**

Co<sup>III</sup>(salen)-OAc + PO = Co<sup>III</sup>(salen)-PO~OAc

Charge: 0

Spin Multiplicity: 3

Sum of electronic and thermal Free Energies (a.u.): -1600.622238

Thermal correction to Gibbs Free Energy (a.u.): 0.441197

No imaginary frequency

Calculation of single point energy based on the optimized structure, Er = -2839.3700868 a.u.

|    |             |             |             |
|----|-------------|-------------|-------------|
| C  | 3.15683200  | -4.39552800 | -0.86350500 |
| C  | 4.17162200  | -3.43125900 | -1.02519400 |
| C  | 1.83271000  | -4.02260300 | -0.72630300 |
| H  | 3.41796300  | -5.44967200 | -0.83806600 |
| C  | 3.83131600  | -2.09351100 | -1.05840600 |
| H  | 5.20756400  | -3.73813400 | -1.11928100 |
| C  | 1.46488500  | -2.65547400 | -0.74095500 |
| H  | 1.04452900  | -4.75455100 | -0.58832300 |
| C  | 2.48611400  | -1.68067400 | -0.93335300 |
| H  | 4.59516800  | -1.32987500 | -1.17047800 |
| O  | 0.20137900  | -2.35413500 | -0.55167700 |
| C  | 2.18750100  | -0.28512200 | -0.99552600 |
| Co | -0.60362300 | -0.69991600 | -0.59943200 |
| N  | 0.99180200  | 0.22747400  | -0.95498700 |
| H  | 3.02780100  | 0.39155400  | -1.07945900 |
| N  | -1.47579700 | 0.96188600  | -0.96121700 |
| C  | 0.80609600  | 1.68452700  | -0.85986200 |
| C  | -2.69790800 | 1.22869200  | -0.63042400 |
| C  | -0.55210600 | 1.98412900  | -1.49251400 |
| C  | 1.90058700  | 2.56241500  | -1.46302100 |
| H  | -3.05307400 | 2.25238400  | -0.74356200 |
| C  | -3.65093400 | 0.27903700  | -0.14441300 |
| C  | -0.94850200 | 3.44315300  | -1.26927700 |
| C  | 1.52277000  | 4.03274700  | -1.22987200 |

|   |             |             |             |
|---|-------------|-------------|-------------|
| H | 2.01556400  | 2.35308100  | -2.53704200 |
| H | 2.84176800  | 2.35269300  | -0.95213500 |
| C | -4.93348700 | 0.73429000  | 0.23882600  |
| C | -3.35871700 | -1.11980200 | -0.11649700 |
| C | 0.14886700  | 4.36906900  | -1.81987700 |
| H | -1.90084300 | 3.67168900  | -1.76154700 |
| H | -1.07491600 | 3.61399400  | -0.19299400 |
| H | 2.28745400  | 4.68713900  | -1.66170500 |
| H | 1.51623800  | 4.20752600  | -0.14770100 |
| C | -5.91219000 | -0.14814800 | 0.64919600  |
| H | -5.13597200 | 1.80174400  | 0.20611400  |
| C | -4.38964800 | -2.00781600 | 0.28077000  |
| O | -2.19922600 | -1.62549900 | -0.45178200 |
| H | 0.18399400  | 4.26979200  | -2.91372800 |
| H | -0.11747000 | 5.41019600  | -1.60836100 |
| C | -5.62851400 | -1.52897500 | 0.66210200  |
| H | -6.88924100 | 0.21321700  | 0.95043800  |
| H | -4.16158400 | -3.06798500 | 0.28520100  |
| H | -6.39604100 | -2.23006500 | 0.97718200  |
| C | 0.20227900  | -0.26877900 | 2.60166300  |
| C | -1.16526800 | -0.81293000 | 2.58141600  |
| O | -0.67302800 | -0.06529200 | 1.44492000  |
| H | 0.38614000  | 0.68407400  | 3.08961400  |
| H | -1.97603700 | -0.31503700 | 3.10773900  |
| H | -1.30668800 | -1.87372000 | 2.38598000  |
| C | 1.40117200  | -1.15242900 | 2.41751300  |
| H | 1.13568400  | -2.07284800 | 1.89320300  |
| H | 2.18318700  | -0.61727900 | 1.87148600  |
| H | 1.79666800  | -1.41707200 | 3.40477400  |
| H | -0.47865300 | 1.79303400  | -2.57442200 |
| H | 0.79011100  | 1.90613300  | 0.22755400  |
| C | 3.71370800  | 2.40389000  | 3.02945700  |
| H | 4.74722600  | 2.47606800  | 2.68169800  |
| H | 3.68651200  | 1.65191800  | 3.82775000  |
| H | 3.38332300  | 3.35595100  | 3.45144000  |
| C | 2.78555200  | 1.95246100  | 1.88952800  |
| O | 3.28877700  | 1.16471200  | 1.03460600  |
| O | 1.59222500  | 2.36997700  | 1.92867100  |

**Co<sup>III</sup>(salen)-OAc counterion addition in the middle carbon**

Co<sup>III</sup>(salen)-OAc + PO = Co<sup>III</sup>(salen)-PO~OAc

Charge: 0

Spin Multiplicity: 3

Sum of electronic and thermal Free Energies (a.u.): -1600.664101

Thermal correction to Gibbs Free Energy (a.u.): 0.445555

No imaginary frequency

Calculation of single point energy based on the optimized structure, Ep = -2839.4105013 a.u.

|    |             |             |             |
|----|-------------|-------------|-------------|
| C  | 4.23844800  | -1.43890400 | -2.63287500 |
| C  | 4.84818000  | -0.24224800 | -2.20504100 |
| C  | 2.89114800  | -1.67052900 | -2.42979900 |
| H  | 4.83763100  | -2.19481700 | -3.13315000 |
| C  | 4.07260200  | 0.70922200  | -1.57377300 |
| H  | 5.90563200  | -0.07166000 | -2.37485000 |
| C  | 2.07628400  | -0.72164600 | -1.76136100 |
| H  | 2.41729600  | -2.58881300 | -2.75869000 |
| C  | 2.69714500  | 0.49240900  | -1.33163200 |
| H  | 4.51639400  | 1.64443100  | -1.23984700 |
| O  | 0.80968200  | -0.99405700 | -1.59149700 |
| C  | 1.94130800  | 1.52555500  | -0.69142900 |
| Co | -0.36504300 | -0.15961800 | -0.36761200 |
| N  | 0.71464900  | 1.41701100  | -0.30487000 |
| H  | 2.45500900  | 2.47547600  | -0.53568700 |
| N  | -1.84740100 | 1.13176800  | -0.50965600 |
| C  | -0.05605900 | 2.50477600  | 0.29810000  |
| C  | -3.10126400 | 0.80537300  | -0.46293000 |
| C  | -1.39046000 | 2.53019700  | -0.47662400 |
| C  | 0.59972100  | 3.88271000  | 0.33906600  |
| H  | -3.85117400 | 1.59856700  | -0.43808900 |
| C  | -3.61539100 | -0.52617900 | -0.42968000 |
| C  | -2.35606000 | 3.55092900  | 0.12933200  |

|   |             |             |             |
|---|-------------|-------------|-------------|
| C | -0.36908200 | 4.90273400  | 0.95458900  |
| H | 0.86873600  | 4.19602300  | -0.67893800 |
| H | 1.52496600  | 3.84431900  | 0.92410500  |
| C | -5.02222000 | -0.69154600 | -0.36027700 |
| C | -2.76635500 | -1.68252200 | -0.46870600 |
| C | -1.70019300 | 4.93843500  | 0.19503500  |
| H | -3.27629900 | 3.61156100  | -0.46079900 |
| H | -2.63687100 | 3.21848900  | 1.13727400  |
| H | 0.09193000  | 5.89582500  | 0.96008700  |
| H | -0.55454600 | 4.63508300  | 2.00289500  |
| C | -5.60353900 | -1.93941400 | -0.32854000 |
| H | -5.64292900 | 0.20110300  | -0.33074900 |
| C | -3.39714500 | -2.95760600 | -0.43739000 |
| O | -1.46933700 | -1.65320800 | -0.54719400 |
| H | -1.52487000 | 5.30272900  | -0.82619400 |
| H | -2.38801800 | 5.64820500  | 0.66619800  |
| C | -4.76918300 | -3.07766400 | -0.36911800 |
| H | -6.68095600 | -2.04851400 | -0.27196300 |
| H | -2.75033400 | -3.82744800 | -0.47045300 |
| H | -5.21466800 | -4.06847200 | -0.34382200 |
| C | 1.05693500  | -2.45587100 | 1.89081300  |
| C | -0.16364100 | -1.52740900 | 2.13627500  |
| O | -0.08464500 | -0.31828400 | 1.43689700  |
| H | 1.26004600  | -2.99824200 | 2.82084300  |
| H | -0.19004100 | -1.27646600 | 3.20346100  |
| H | -1.07149100 | -2.09793700 | 1.89060700  |
| C | 0.89787700  | -3.43057100 | 0.73509900  |
| H | 0.70291800  | -2.90886400 | -0.20210100 |
| H | 1.80390700  | -4.03492400 | 0.62804800  |
| H | 0.05640300  | -4.10055400 | 0.93689100  |
| H | -1.15828800 | 2.82540100  | -1.51140200 |
| H | -0.27743200 | 2.17153700  | 1.32084700  |
| C | 3.83997400  | -0.01185000 | 2.06022500  |
| H | 3.38741000  | 0.93924000  | 1.76132200  |
| H | 4.33515200  | -0.43587700 | 1.18593900  |
| H | 4.55283700  | 0.18269700  | 2.86260300  |
| C | 2.74007200  | -0.91286700 | 2.57147400  |
| O | 2.23024600  | -1.66220400 | 1.57846100  |
| O | 2.35811600  | -0.94762000 | 3.72306000  |

#### subsequent hydrolysis

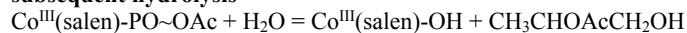

Charge: 0

Spin Multiplicity: 3

Sum of electronic and thermal Free Energies (a.u.): -1677.065362

Thermal correction to Gibbs Free Energy (a.u.): 0.465599

Imaginary frequencies: -668.03

Calculation of single point energy based on the optimized structure, Et = -2915.8632676 a.u.

|    |             |             |             |
|----|-------------|-------------|-------------|
| C  | -1.76912900 | 4.69548300  | -0.93909600 |
| C  | -2.38251200 | 4.08767700  | -2.05383000 |
| C  | -0.99227700 | 3.96606900  | -0.06111800 |
| H  | -1.90804900 | 5.75920500  | -0.76591800 |
| C  | -2.19951600 | 2.73546700  | -2.25342700 |
| H  | -2.98847100 | 4.67261600  | -2.73693100 |
| C  | -0.77234000 | 2.57468200  | -0.24538000 |
| H  | -0.52085100 | 4.43134700  | 0.79767100  |
| C  | -1.40206200 | 1.95751100  | -1.38015400 |
| H  | -2.67239300 | 2.23800100  | -3.09710700 |
| O  | -0.05678700 | 1.94273900  | 0.64358800  |
| C  | -1.34887300 | 0.54063600  | -1.58689100 |
| Co | 0.81500000  | 0.31251700  | 0.28517800  |
| N  | -0.55627400 | -0.25681700 | -0.95385400 |
| H  | -2.05414700 | 0.11694700  | -2.30531000 |
| N  | 1.64161000  | -1.33302900 | -0.22270700 |
| C  | -0.66147900 | -1.71532900 | -0.91996700 |
| C  | 2.92567700  | -1.50933800 | -0.22978300 |
| C  | 0.76517000  | -2.27299000 | -0.94986200 |
| C  | -1.52086100 | -2.43624800 | -1.95276400 |
| H  | 3.30396300  | -2.49133900 | -0.52791300 |
| C  | 3.89931500  | -0.49038600 | 0.00445000  |

|   |             |             |             |
|---|-------------|-------------|-------------|
| C | 0.74234700  | -3.71967600 | -0.45438800 |
| C | -1.56370600 | -3.92519700 | -1.55944300 |
| H | -1.09930800 | -2.30595300 | -2.95897700 |
| H | -2.54067000 | -2.04624800 | -1.95200200 |
| C | 5.25269800  | -0.85247500 | 0.18772100  |
| C | 3.53936200  | 0.89293300  | -0.13491000 |
| C | -0.16401200 | -4.54105700 | -1.39071500 |
| H | 1.75052700  | -4.14786500 | -0.43798800 |
| H | 0.36381000  | -3.73044000 | 0.57400300  |
| H | -2.12939800 | -4.49143500 | -2.30679900 |
| H | -2.11996300 | -4.00218300 | -0.61815700 |
| C | 6.24417100  | 0.10394200  | 0.27021400  |
| H | 5.50084300  | -1.90783700 | 0.27116300  |
| C | 4.58676800  | 1.84938200  | -0.08149000 |
| O | 2.31950900  | 1.30325500  | -0.34442500 |
| H | 0.32111200  | -4.60833100 | -2.37426500 |
| H | -0.25107300 | -5.56655600 | -1.01628900 |
| C | 5.89641000  | 1.46323000  | 0.12807500  |
| H | 7.27758400  | -0.18380600 | 0.43038200  |
| H | 4.31298200  | 2.89244300  | -0.19781200 |
| H | 6.67302300  | 2.22141300  | 0.18073600  |
| H | 1.10448700  | -2.26645300 | -1.99624900 |
| H | -1.06556900 | -1.91859000 | 0.07818100  |
| O | 1.73162000  | 0.27080500  | 2.15051000  |
| H | 1.60617000  | 1.16849100  | 2.48860600  |
| H | 0.74821000  | -0.30280000 | 2.29955600  |
| C | -2.76203800 | -0.62553200 | 2.36598200  |
| C | -1.36153900 | -0.09415100 | 2.65145400  |
| O | -0.37112900 | -0.74097100 | 1.89873100  |
| H | -2.70386600 | -1.68711300 | 2.11995600  |
| H | -1.17504600 | -0.25208500 | 3.72819700  |
| H | -1.36867300 | 0.99438200  | 2.47799700  |
| C | -3.74173700 | -0.37795600 | 3.50601000  |
| H | -3.79097800 | 0.68835500  | 3.74928200  |
| H | -4.74544000 | -0.71639500 | 3.23382600  |
| H | -3.42698400 | -0.92335100 | 4.40057500  |
| C | -4.60038400 | 0.26396100  | -0.74274900 |
| H | -5.61090900 | 0.43381900  | -0.35532200 |
| H | -4.68774200 | -0.22751800 | -1.71287100 |
| H | -4.10854800 | 1.23248300  | -0.83703500 |
| C | -3.86797600 | -0.63771300 | 0.22412000  |
| O | -3.29338100 | 0.07843400  | 1.20050700  |
| O | -3.83556400 | -1.85173500 | 0.13741100  |

**subsequent hydrolysis**

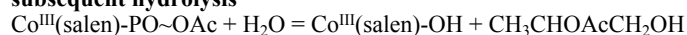

Charge: 0

Spin Multiplicity: 3

Sum of electronic and thermal Free Energies (a.u.): -1677.093602

Thermal correction to Gibbs Free Energy (a.u.): 0.466630

No imaginary frequency

Calculation of single point energy based on the optimized structure, Er = -2915.8992303 a.u.

|    |             |             |             |
|----|-------------|-------------|-------------|
| C  | -4.39880100 | 2.50676000  | -1.94128900 |
| C  | -4.98759800 | 1.23064600  | -2.07766400 |
| C  | -3.07348700 | 2.65112800  | -1.58413400 |
| H  | -4.99966600 | 3.39409300  | -2.12076300 |
| C  | -4.21637000 | 0.11451100  | -1.83678000 |
| H  | -6.02989700 | 1.13389500  | -2.36095400 |
| C  | -2.25209700 | 1.51800500  | -1.33304000 |
| H  | -2.61532500 | 3.62841700  | -1.47933400 |
| C  | -2.85558800 | 0.22604700  | -1.46162200 |
| H  | -4.64871500 | -0.87986100 | -1.91848100 |
| O  | -1.01045100 | 1.71965300  | -0.99743600 |
| C  | -2.13183200 | -0.96290400 | -1.14628000 |
| Co | 0.33726300  | 0.44103300  | -0.73814100 |
| N  | -0.87678300 | -1.01391700 | -0.83578800 |
| H  | -2.70069300 | -1.89215500 | -1.14142800 |
| N  | 1.69025900  | -0.92843400 | -0.94319400 |
| C  | -0.22047000 | -2.22496900 | -0.33190400 |
| C  | 2.94676300  | -0.71680400 | -0.73575600 |

|   |             |             |             |
|---|-------------|-------------|-------------|
| C | 1.13003700  | -2.28833500 | -1.05861000 |
| C | -0.99504100 | -3.53359100 | -0.42742800 |
| H | 3.62014200  | -1.57067100 | -0.68194500 |
| C | 3.54999100  | 0.57259300  | -0.57791600 |
| C | 1.99482000  | -3.42376700 | -0.50841200 |
| C | -0.12808200 | -4.67074500 | 0.13418200  |
| H | -1.26030100 | -3.74525700 | -1.47306400 |
| H | -1.92032700 | -3.45063500 | 0.15078100  |
| C | 4.93133500  | 0.63744400  | -0.28068800 |
| C | 2.81110300  | 1.77846000  | -0.79045000 |
| C | 1.22642200  | -4.75260600 | -0.57967600 |
| H | 2.92270400  | -3.51359800 | -1.08465600 |
| H | 2.26265700  | -3.17558500 | 0.52557700  |
| H | -0.66250200 | -5.62254700 | 0.04569700  |
| H | 0.03447800  | -4.49486700 | 1.20463000  |
| C | 5.58949000  | 1.84675900  | -0.18240500 |
| H | 5.47106200  | -0.29444800 | -0.12906700 |
| C | 3.51888800  | 3.00520000  | -0.71672500 |
| O | 1.53399700  | 1.81727600  | -1.06810800 |
| H | 1.06468100  | -5.02380900 | -1.63239300 |
| H | 1.83691900  | -5.54954600 | -0.14223100 |
| C | 4.86648700  | 3.03443000  | -0.41117000 |
| H | 6.64651800  | 1.88366400  | 0.05736900  |
| H | 2.95589000  | 3.91520200  | -0.89299800 |
| H | 5.37515200  | 3.99220100  | -0.34432000 |
| H | 0.92373300  | -2.46262000 | -2.12565100 |
| H | -0.02949500 | -2.00809800 | 0.72571100  |
| O | 2.41667200  | -1.34792100 | 2.14415000  |
| H | 3.17565400  | -0.75275900 | 2.12279400  |
| H | 1.67578600  | -0.77800700 | 1.81970800  |
| C | -0.80650100 | 0.91808300  | 3.06668200  |
| C | 0.22639900  | 1.34477500  | 2.02146700  |
| O | 0.51830200  | 0.28897400  | 1.16077500  |
| H | -0.57472200 | -0.09956300 | 3.39067400  |
| H | 1.13597700  | 1.66297800  | 2.56150000  |
| H | -0.16025400 | 2.22186300  | 1.48168800  |
| C | -0.89761500 | 1.88033000  | 4.24156000  |
| H | -1.12020800 | 2.89478900  | 3.89515100  |
| H | -1.68687800 | 1.57327000  | 4.93284200  |
| H | 0.05073000  | 1.90094800  | 4.78637900  |
| C | -4.11046500 | -0.03332500 | 1.64309300  |
| H | -4.72215500 | 0.12796100  | 2.53719200  |
| H | -4.47942800 | -0.91070900 | 1.11329800  |
| H | -4.19646800 | 0.85251400  | 1.01247100  |
| C | -2.67769300 | -0.25817800 | 2.07060600  |
| O | -2.12806200 | 0.90580000  | 2.45522200  |
| O | -2.12871500 | -1.34230300 | 2.10197800  |

**subsequent hydrolysis**

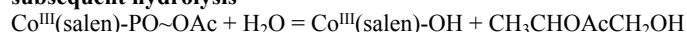

Charge: 0

Spin Multiplicity: 3

Sum of electronic and thermal Free Energies (a.u.): -1677.100904

Thermal correction to Gibbs Free Energy (a.u.): 0.469560

No imaginary frequency

Calculation of single point energy based on the optimized structure,  $E_p = -2915.9018356$  a.u.

|    |             |            |             |
|----|-------------|------------|-------------|
| C  | -3.02537000 | 4.84955400 | 0.03136500  |
| C  | -4.03858700 | 3.98002300 | -0.41572900 |
| C  | -1.71032400 | 4.43048800 | 0.12676500  |
| H  | -3.27855600 | 5.86935300 | 0.30818900  |
| C  | -3.69882900 | 2.68923500 | -0.77221600 |
| H  | -5.06562100 | 4.32135700 | -0.48596900 |
| C  | -1.34096300 | 3.10329600 | -0.20449100 |
| H  | -0.92558500 | 5.09553700 | 0.47047000  |
| C  | -2.36760500 | 2.22809900 | -0.67193000 |
| H  | -4.45831600 | 2.00012900 | -1.13346600 |
| O  | -0.08512600 | 2.75354800 | -0.07591500 |
| C  | -2.06506900 | 0.89887700 | -1.11356000 |
| Co | 0.60142500  | 1.01360100 | -0.07679200 |
| N  | -0.91552400 | 0.32405800 | -1.00277500 |

|   |             |             |             |
|---|-------------|-------------|-------------|
| H | -2.87475700 | 0.34466700  | -1.58279700 |
| N | 1.59562600  | -0.20501300 | -1.21200800 |
| C | -0.64167500 | -1.02661200 | -1.50626300 |
| C | 2.85855300  | -0.46636100 | -1.06588100 |
| C | 0.74492200  | -0.94896600 | -2.16258500 |
| C | -1.67561000 | -1.64559100 | -2.44158700 |
| H | 3.29722300  | -1.25537500 | -1.67741100 |
| C | 3.75563200  | 0.18494400  | -0.16914100 |
| C | 1.22339800  | -2.35004000 | -2.54753500 |
| C | -1.20306000 | -3.04886600 | -2.85022200 |
| H | -1.80559600 | -1.01533200 | -3.33278700 |
| H | -2.63582200 | -1.71795600 | -1.92668300 |
| C | 5.10817300  | -0.24129900 | -0.15432500 |
| C | 3.33851600  | 1.25402300  | 0.69011200  |
| C | 0.19662900  | -3.01962900 | -3.47457000 |
| H | 2.19298400  | -2.30973500 | -3.05530000 |
| H | 1.34736900  | -2.93276500 | -1.62660800 |
| H | -1.92033900 | -3.49417000 | -3.54778700 |
| H | -1.18892100 | -3.68861700 | -1.95862500 |
| C | 6.04223600  | 0.35179600  | 0.66511600  |
| H | 5.39667100  | -1.05723700 | -0.81265500 |
| C | 4.32748600  | 1.85237700  | 1.51894200  |
| O | 2.12472000  | 1.71799000  | 0.75683300  |
| H | 0.15809100  | -2.47001800 | -4.42512300 |
| H | 0.52829000  | -4.03551200 | -3.71457900 |
| C | 5.63430700  | 1.41163400  | 1.50416600  |
| H | 7.07267700  | 0.01404500  | 0.66729000  |
| H | 4.00860100  | 2.66608700  | 2.16113700  |
| H | 6.36253500  | 1.88979600  | 2.15364200  |
| H | 0.65831400  | -0.32753900 | -3.06716700 |
| H | -0.53807900 | -1.66720100 | -0.62428300 |
| O | 0.13113900  | 0.05840600  | 1.47634200  |
| H | 0.72672500  | 0.40333000  | 2.15763200  |
| H | 0.34868300  | -1.58630600 | 1.31229300  |
| C | -1.65994600 | -3.35376700 | 1.86652000  |
| C | -0.13454100 | -3.40376300 | 1.94440500  |
| O | 0.50367900  | -2.53318300 | 1.04215300  |
| H | -1.97823400 | -3.42341700 | 0.82377600  |
| H | 0.18545900  | -4.42422800 | 1.69918400  |
| H | 0.16561200  | -3.20804100 | 2.98654000  |
| C | -2.33767000 | -4.41862400 | 2.71638500  |
| H | -2.04288200 | -4.32338000 | 3.76623000  |
| H | -3.42470400 | -4.32128300 | 2.65484000  |
| H | -2.06163700 | -5.41895000 | 2.36828000  |
| C | -2.95604600 | 0.10975500  | 2.22318700  |
| H | -3.24673400 | -0.01615200 | 3.26857300  |
| H | -3.70206400 | 0.68705200  | 1.67844700  |
| H | -1.98949700 | 0.62337200  | 2.19081600  |
| C | -2.74769000 | -1.22362700 | 1.56219600  |
| O | -2.06887600 | -2.05735600 | 2.37392700  |
| O | -3.11456800 | -1.51487800 | 0.43741200  |

five-coordinated Co<sup>III</sup>(salen)-OTs counterion addition in the terminal carbon and subsequent hydrolysis

**Co<sup>III</sup>(salen)-OTs counterion addition in the terminal carbon**

Co<sup>III</sup>(salen)-OTs + PO = Co<sup>III</sup>(salen)-PO~OTs

Charge: 0

Spin Multiplicity: 3

Sum of electronic and thermal Free Energies (a.u.): -2266.846013

Thermal correction to Gibbs Free Energy (a.u.): 0.512912

Imaginary frequencies: -430.65

Calculation of single point energy based on the optimized structure, Et = -3505.8507742 a.u.

|   |             |            |             |
|---|-------------|------------|-------------|
| C | -0.01299300 | 5.62227900 | 0.59759700  |
| C | 1.20114100  | 5.20287000 | 1.17757300  |
| C | -1.02741100 | 4.72228300 | 0.33017500  |
| H | -0.15465100 | 6.67086400 | 0.35117300  |
| C | 1.36774400  | 3.86889500 | 1.48890400  |
| H | 1.99083700  | 5.91913900 | 1.37596800  |
| C | -0.87199400 | 3.34355700 | 0.62206600  |
| H | -1.96246900 | 5.03524600 | -0.12139700 |

|    |             |             |             |
|----|-------------|-------------|-------------|
| C  | 0.34845000  | 2.92305800  | 1.23171600  |
| H  | 2.29396800  | 3.52053000  | 1.93832800  |
| O  | -1.84726700 | 2.52916000  | 0.30674800  |
| C  | 0.56628800  | 1.55931700  | 1.60196900  |
| Co | -1.94297400 | 0.68972000  | 0.56479300  |
| N  | -0.29167300 | 0.59867100  | 1.48470800  |
| H  | 1.54321800  | 1.32539200  | 2.01882700  |
| N  | -2.24879800 | -1.06900100 | 1.27027900  |
| C  | 0.07201400  | -0.80494500 | 1.72591400  |
| C  | -3.15101100 | -1.87843200 | 0.81597700  |
| C  | -1.20332300 | -1.49035900 | 2.22349500  |
| C  | 1.26798700  | -1.05928500 | 2.63846600  |
| H  | -3.14836200 | -2.91007500 | 1.16701200  |
| C  | -4.17978900 | -1.53238700 | -0.11366500 |
| C  | -0.98894900 | -2.99623000 | 2.37280200  |
| C  | 1.47370900  | -2.57300800 | 2.79690700  |
| H  | 1.10859800  | -0.58531400 | 3.61769600  |
| H  | 2.16743400  | -0.62283100 | 2.19424900  |
| C  | -5.04335300 | -2.55178400 | -0.57939100 |
| C  | -4.39358800 | -0.17941100 | -0.52399400 |
| C  | 0.20392600  | -3.26569900 | 3.30307200  |
| H  | -1.88688800 | -3.47951400 | 2.77375600  |
| H  | -0.78811700 | -3.42377800 | 1.38275300  |
| H  | 2.30733400  | -2.76350400 | 3.48156900  |
| H  | 1.74713400  | -2.98199400 | 1.81810800  |
| C  | -6.08858800 | -2.27049200 | -1.43428900 |
| H  | -4.86188500 | -3.57255400 | -0.25250500 |
| C  | -5.49007400 | 0.08619500  | -1.38298800 |
| O  | -3.65298200 | 0.82748200  | -0.13902000 |
| H  | -0.03651600 | -2.90797000 | 4.31391400  |
| H  | 0.36549700  | -4.34576200 | 3.38258900  |
| C  | -6.30625500 | -0.93500000 | -1.83004100 |
| H  | -6.73611500 | -3.06218900 | -1.79461600 |
| H  | -5.65065400 | 1.11616800  | -1.68198100 |
| H  | -7.12894900 | -0.70282600 | -2.50049500 |
| C  | -1.29726600 | 0.59903800  | -2.26342700 |
| C  | 0.06817800  | 1.13886600  | -2.15417700 |
| O  | -1.12926900 | -0.09142000 | -1.03990800 |
| H  | -2.07060300 | 1.37809500  | -2.19664300 |
| H  | 0.24045200  | 2.01305400  | -1.54127200 |
| H  | 0.85366600  | 0.80769600  | -2.82020300 |
| C  | -1.55951700 | -0.35667900 | -3.41279500 |
| H  | -2.51639100 | -0.86090700 | -3.24806500 |
| H  | -1.60999600 | 0.18387000  | -4.36508100 |
| H  | -0.76140400 | -1.10157000 | -3.46356300 |
| H  | -1.47383100 | -1.06183000 | 3.20039200  |
| H  | 0.30672400  | -1.21622400 | 0.73800300  |
| O  | 1.66790900  | -2.21667500 | -0.54676700 |
| O  | 1.60122000  | 0.27357900  | -0.80955800 |
| S  | 2.11656800  | -1.05978000 | -1.35677000 |
| O  | 1.90028400  | -1.15262100 | -2.81942300 |
| C  | 3.88645500  | -0.92831600 | -1.08943800 |
| C  | 4.67036200  | -0.22784800 | -2.00665500 |
| C  | 4.45838400  | -1.47807600 | 0.05587900  |
| C  | 6.03281600  | -0.07609100 | -1.76697300 |
| H  | 4.21063100  | 0.17574400  | -2.90208900 |
| C  | 5.82430000  | -1.31701100 | 0.28532000  |
| H  | 3.83578200  | -2.03888400 | 0.74361300  |
| C  | 6.63081900  | -0.61559700 | -0.61870600 |
| H  | 6.64600300  | 0.46614700  | -2.48227200 |
| H  | 6.27304300  | -1.74765500 | 1.17682300  |
| C  | 8.11423800  | -0.47074600 | -0.38495000 |
| H  | 8.36830100  | -0.60855600 | 0.66976900  |
| H  | 8.67791400  | -1.21657900 | -0.95877300 |
| H  | 8.47343500  | 0.51509500  | -0.69621600 |

**Co<sup>III</sup>(salen)-OTs counterion addition in the terminal carbon**

Co<sup>III</sup>(salen)-OTs + PO = Co<sup>III</sup>(salen)-PO-OTs

Charge: 0

Spin Multiplicity: 3



Sum of electronic and thermal Free Energies (a.u.): -2266.896494

Thermal correction to Gibbs Free Energy (a.u.): 0.512919

No imaginary frequency

Calculation of single point energy based on the optimized structure, Er = -3505.9044884 a.u.

|    |             |             |             |
|----|-------------|-------------|-------------|
| C  | -1.82045600 | 5.64806400  | -0.72088800 |
| C  | -0.48153300 | 5.69432200  | -0.28437800 |
| C  | -2.56902000 | 4.49081300  | -0.60999600 |
| H  | -2.27189500 | 6.53323200  | -1.15960300 |
| C  | 0.08364800  | 4.56625200  | 0.27611300  |
| H  | 0.09606200  | 6.60635600  | -0.38683500 |
| C  | -2.00075300 | 3.31559800  | -0.06255700 |
| H  | -3.59613900 | 4.43984400  | -0.95393300 |
| C  | -0.65616600 | 3.36966600  | 0.40992600  |
| H  | 1.11300500  | 4.57835900  | 0.62256900  |
| O  | -2.73504100 | 2.22774300  | -0.03521700 |
| C  | -0.04340700 | 2.25104700  | 1.05458700  |
| Co | -2.24960000 | 0.54747800  | 0.53402600  |
| N  | -0.62085400 | 1.11621600  | 1.30464000  |
| H  | 0.99102600  | 2.37137600  | 1.36012300  |
| N  | -1.92643700 | -1.09892200 | 1.42722000  |
| C  | 0.14788100  | -0.01220900 | 1.86182300  |
| C  | -2.44133600 | -2.23181700 | 1.06862600  |
| C  | -0.86883900 | -0.98504500 | 2.45226200  |
| C  | 1.24870800  | 0.33799700  | 2.85986900  |
| H  | -2.06400200 | -3.14141800 | 1.53355200  |
| C  | -3.49740900 | -2.38980900 | 0.11826300  |
| C  | -0.18030600 | -2.28192200 | 2.87311400  |
| C  | 1.93384400  | -0.95667200 | 3.32558100  |
| H  | 0.82739800  | 0.89130700  | 3.71183900  |
| H  | 1.99370000  | 0.96773900  | 2.36923700  |
| C  | -3.90223500 | -3.69520900 | -0.24574700 |
| C  | -4.19961800 | -1.25876600 | -0.40233500 |
| C  | 0.92645300  | -1.96344300 | 3.89195900  |
| H  | -0.89990600 | -2.98190000 | 3.31340900  |
| H  | 0.26266200  | -2.74865200 | 1.98529400  |
| H  | 2.69512900  | -0.72087800 | 4.07684000  |
| H  | 2.44030000  | -1.39753100 | 2.46058100  |
| C  | -4.96386600 | -3.89939800 | -1.10326200 |
| H  | -3.35455800 | -4.54062400 | 0.16210600  |
| C  | -5.30707400 | -1.49619100 | -1.25367600 |
| O  | -3.87899600 | -0.01718400 | -0.13324500 |
| H  | 0.46976100  | -1.56250900 | 4.80790700  |
| H  | 1.43475900  | -2.89119700 | 4.17428700  |
| C  | -5.66884500 | -2.78419200 | -1.60011800 |
| H  | -5.25815500 | -4.90381500 | -1.38655000 |
| H  | -5.84152500 | -0.63191400 | -1.63220800 |
| H  | -6.51007700 | -2.93812200 | -2.26969800 |
| C  | -1.59054200 | -0.43814100 | -2.44633700 |
| C  | -0.71585900 | 0.72273900  | -2.22824900 |
| O  | -1.10337400 | -0.12816300 | -1.10432200 |
| H  | -2.65694600 | -0.24238400 | -2.54578200 |
| H  | -1.15957300 | 1.71345500  | -2.19312000 |
| H  | 0.34431800  | 0.63927900  | -2.44800400 |
| C  | -1.07228900 | -1.73541200 | -2.99616600 |
| H  | -1.60018000 | -2.57755600 | -2.53618200 |
| H  | -1.24884500 | -1.77386300 | -4.07678600 |
| H  | 0.00009600  | -1.81692200 | -2.80223800 |
| H  | -1.34621600 | -0.52118200 | 3.32898600  |
| H  | 0.62046700  | -0.51260800 | 1.00920100  |
| O  | 2.00557500  | -1.60663500 | 0.03239000  |
| O  | 2.06051100  | 0.86243300  | -0.31522200 |
| S  | 2.43322800  | -0.48199000 | -0.85870600 |
| O  | 2.05019000  | -0.68134900 | -2.28432300 |
| C  | 4.22962800  | -0.52188500 | -0.83227900 |
| C  | 4.90746800  | -1.44634200 | -1.62892900 |
| C  | 4.93772100  | 0.33078800  | 0.01046900  |
| C  | 6.29593200  | -1.51681100 | -1.57003500 |
| H  | 4.34233100  | -2.08488100 | -2.29900200 |
| C  | 6.32961500  | 0.25104500  | 0.06171100  |

|   |            |             |             |
|---|------------|-------------|-------------|
| H | 4.39274200 | 1.05975100  | 0.59946800  |
| C | 7.02875800 | -0.67443000 | -0.72084700 |
| H | 6.82409800 | -2.23183700 | -2.19628900 |
| H | 6.88274500 | 0.92214700  | 0.71431200  |
| C | 8.53265500 | -0.77721900 | -0.64868000 |
| H | 8.97088400 | 0.10308200  | -0.17004900 |
| H | 8.84271100 | -1.65607800 | -0.06985800 |
| H | 8.97493400 | -0.87645100 | -1.64540200 |

**Co<sup>III</sup>(salen)-OTs counterion addition in the terminal carbon**

Co<sup>III</sup>(salen)-OTs + PO = Co<sup>III</sup>(salen)-PO~OTs

Charge: 0

Spin Multiplicity: 3

Sum of electronic and thermal Free Energies (a.u.): -2266.909973

Thermal correction to Gibbs Free Energy (a.u.): 0.517823

No imaginary frequency

Calculation of single point energy based on the optimized structure, Ep = -3505.9104881 a.u.

|    |             |             |             |
|----|-------------|-------------|-------------|
| C  | 3.01625700  | -2.16823700 | -2.86078300 |
| C  | 3.64108600  | -0.90953200 | -2.78018000 |
| C  | 1.71915700  | -2.35474700 | -2.41732500 |
| H  | 3.56001900  | -3.01083200 | -3.27983500 |
| C  | 2.93729000  | 0.14898900  | -2.24095900 |
| H  | 4.65824400  | -0.77490100 | -3.13128500 |
| C  | 0.97699900  | -1.28610900 | -1.85459900 |
| H  | 1.23062000  | -3.32102700 | -2.48230100 |
| C  | 1.61680100  | -0.01279900 | -1.77030500 |
| H  | 3.40266800  | 1.12655600  | -2.15242600 |
| O  | -0.24673500 | -1.51714600 | -1.45484200 |
| C  | 0.93411100  | 1.12563600  | -1.23381900 |
| Co | -1.42817300 | -0.37157600 | -0.54438300 |
| N  | -0.26761700 | 1.12325600  | -0.76734500 |
| H  | 1.48719100  | 2.06429600  | -1.23311500 |
| N  | -2.84246100 | 0.97250800  | -0.81088000 |
| C  | -0.93736800 | 2.31140100  | -0.24017500 |
| C  | -4.10136700 | 0.72522300  | -0.64412000 |
| C  | -2.30853400 | 2.33899400  | -0.94643000 |
| C  | -0.19806800 | 3.63863100  | -0.36376000 |
| H  | -4.81031600 | 1.55522300  | -0.67261500 |
| C  | -4.67395400 | -0.56402000 | -0.40524000 |
| C  | -3.18059200 | 3.46907900  | -0.39640600 |
| C  | -1.07565400 | 4.76727200  | 0.19617600  |
| H  | 0.03935500  | 3.84441600  | -1.41703100 |
| H  | 0.74469500  | 3.58170300  | 0.18935900  |
| C  | -6.08030200 | -0.63950500 | -0.24741500 |
| C  | -3.88755900 | -1.76127100 | -0.32507800 |
| C  | -2.44203100 | 4.81270600  | -0.49875400 |
| H  | -4.12819800 | 3.53137900  | -0.94199000 |
| H  | -3.42059500 | 3.25087100  | 0.65225500  |
| H  | -0.56249000 | 5.72834600  | 0.08561900  |
| H  | -1.21893700 | 4.60748100  | 1.27245600  |
| C  | -6.72220800 | -1.83745300 | -0.02065100 |
| H  | -6.65301100 | 0.28307700  | -0.30875900 |
| C  | -4.57913300 | -2.98245800 | -0.09630300 |
| O  | -2.59341900 | -1.81901300 | -0.46321200 |
| H  | -2.30134400 | 5.06610200  | -1.55839600 |
| H  | -3.06239300 | 5.60564900  | -0.06780600 |
| C  | -5.95042300 | -3.01597700 | 0.05169500  |
| H  | -7.79913900 | -1.87549100 | 0.10116000  |
| H  | -3.97985600 | -3.88484000 | -0.04216800 |
| H  | -6.44215800 | -3.96843900 | 0.23017200  |
| C  | -1.09690400 | -1.17628600 | 2.16644000  |
| C  | 0.21067200  | -1.91734600 | 1.80480500  |
| O  | -1.30892800 | -0.11145400 | 1.29536000  |
| H  | -1.88694200 | -1.94346000 | 2.06896900  |
| H  | 0.02730900  | -2.62339800 | 0.99407700  |
| H  | 0.64811100  | -2.43000400 | 2.66586400  |
| C  | -1.12102700 | -0.64179400 | 3.60153000  |
| H  | -2.10346000 | -0.20500200 | 3.80221400  |
| H  | -0.93970500 | -1.44367500 | 4.32554000  |
| H  | -0.36535300 | 0.13300800  | 3.74361400  |

|   |             |             |             |
|---|-------------|-------------|-------------|
| H | -2.12257800 | 2.51485000  | -2.01705200 |
| H | -1.10556300 | 2.08685900  | 0.82005000  |
| O | 1.51430800  | 1.36057200  | 1.95949300  |
| O | 1.21782100  | -1.05080700 | 1.20501300  |
| S | 2.05051700  | 0.00552100  | 2.10798200  |
| O | 2.21805900  | -0.55761100 | 3.44990400  |
| C | 3.57528200  | -0.07674700 | 1.19084200  |
| C | 4.11855400  | -1.31422100 | 0.84373000  |
| C | 4.22982300  | 1.11185000  | 0.88007300  |
| C | 5.32826100  | -1.34998700 | 0.16241600  |
| H | 3.58583800  | -2.22768800 | 1.07887000  |
| C | 5.44705500  | 1.05604700  | 0.20224400  |
| H | 3.78157000  | 2.05831500  | 1.15940000  |
| C | 6.00935200  | -0.16949600 | -0.17035300 |
| H | 5.74776000  | -2.30849600 | -0.12918200 |
| H | 5.96406700  | 1.97885200  | -0.04547300 |
| C | 7.29989400  | -0.22956300 | -0.94660800 |
| H | 7.81961100  | 0.73184600  | -0.93736500 |
| H | 7.97583800  | -0.98769900 | -0.53888100 |
| H | 7.11041600  | -0.49601700 | -1.99359900 |

**subsequent hydrolysis (H<sub>2</sub>O molecule is opposite the counterion OTs<sup>-</sup>)**

Co<sup>III</sup>(salen)-PO~OTs + H<sub>2</sub>O = Co<sup>III</sup>(salen)-OH + CH<sub>3</sub>CHOHCH<sub>2</sub>OTs

Charge: 0

Spin Multiplicity: 3

Sum of electronic and thermal Free Energies (a.u.): -2343.313991

Thermal correction to Gibbs Free Energy (a.u.): 0.537418

Imaginary frequencies: -645.37

Calculation of single point energy based on the optimized structure, Et = -3582.3697239 a.u.

|    |             |             |             |
|----|-------------|-------------|-------------|
| C  | -0.14537400 | 4.84709900  | -1.42093600 |
| C  | -0.61334300 | 4.24269600  | -2.60439600 |
| C  | 0.44277000  | 4.10036100  | -0.41774400 |
| H  | -0.24837500 | 5.92115700  | -1.29087000 |
| C  | -0.47555500 | 2.87759700  | -2.75078900 |
| H  | -1.07747600 | 4.83952700  | -3.38191400 |
| C  | 0.60600000  | 2.69606000  | -0.54146000 |
| H  | 0.79778400  | 4.56189300  | 0.49736700  |
| C  | 0.13938300  | 2.08464100  | -1.75467500 |
| H  | -0.84473100 | 2.38164400  | -3.64475400 |
| O  | 1.11015000  | 2.04108500  | 0.47200500  |
| C  | 0.16889700  | 0.66219200  | -1.94163100 |
| Co | 1.96327100  | 0.37108300  | 0.28598200  |
| N  | 0.81749500  | -0.15329300 | -1.17821800 |
| H  | -0.43917200 | 0.25710200  | -2.74911300 |
| N  | 2.79152600  | -1.31622600 | -0.04660900 |
| C  | 0.63892400  | -1.60675300 | -1.14887100 |
| C  | 4.04454400  | -1.54977300 | 0.18647200  |
| C  | 2.01858500  | -2.22808200 | -0.91450100 |
| C  | -0.05194000 | -2.30557800 | -2.31533500 |
| H  | 4.42491500  | -2.55246900 | -0.02856100 |
| C  | 5.00463100  | -0.57150100 | 0.59138900  |
| C  | 1.83657700  | -3.66354600 | -0.41926100 |
| C  | -0.23795600 | -3.78431800 | -1.92549300 |
| H  | 0.55631000  | -2.21374100 | -3.22588200 |
| H  | -1.02794000 | -1.86129500 | -2.52041900 |
| C  | 6.28097400  | -0.99139000 | 1.02818100  |
| C  | 4.74292000  | 0.82448000  | 0.37748300  |
| C  | 1.07748700  | -4.45856400 | -1.49884300 |
| H  | 2.80322200  | -4.13714000 | -0.21504300 |
| H  | 1.27630600  | -3.63880300 | 0.52223400  |
| H  | -0.68276800 | -4.33441300 | -2.76114400 |
| H  | -0.96311700 | -3.82686000 | -1.10518500 |
| C  | 7.28374300  | -0.07979100 | 1.28936900  |
| H  | 6.45886700  | -2.05555500 | 1.16341800  |
| C  | 5.80611000  | 1.73314400  | 0.62122900  |
| O  | 3.60493200  | 1.28625900  | -0.05991600 |
| H  | 1.73025900  | -4.56358100 | -2.37654100 |
| H  | 0.87642400  | -5.47292700 | -1.13798300 |
| C  | 7.03352400  | 1.29149300  | 1.07558700  |
| H  | 8.25406200  | -0.41170800 | 1.64258400  |

|   |             |             |             |
|---|-------------|-------------|-------------|
| H | 5.60868700  | 2.78563100  | 0.44850600  |
| H | 7.82153100  | 2.01450800  | 1.26824800  |
| H | 2.54412600  | -2.25379600 | -1.88052100 |
| H | 0.05319000  | -1.77427800 | -0.23817500 |
| O | 2.48605500  | 0.35496000  | 2.28792300  |
| H | 2.32977400  | 1.26889800  | 2.56362200  |
| H | 1.47915700  | -0.19512100 | 2.27275700  |
| C | -0.67554100 | 0.03018600  | 2.16576300  |
| C | -1.70391900 | 0.28279800  | 1.06944600  |
| O | 0.45290200  | -0.63463800 | 1.67562600  |
| H | -0.41263400 | 1.04746800  | 2.51634700  |
| H | -1.27238700 | 0.85925000  | 0.25483700  |
| H | -2.57780500 | 0.80686900  | 1.47312700  |
| C | -1.27941400 | -0.75162300 | 3.33793000  |
| H | -0.52969700 | -0.87179000 | 4.12447300  |
| H | -2.14997900 | -0.23717200 | 3.76213400  |
| H | -1.58671900 | -1.74519200 | 3.00154700  |
| O | -2.72035300 | -0.04171400 | -1.69795000 |
| O | -2.13877900 | -1.01319500 | 0.55355300  |
| S | -3.17154000 | -1.01163700 | -0.69485800 |
| O | -3.32476600 | -2.42124600 | -1.03694600 |
| C | -4.67437400 | -0.40184600 | 0.03111200  |
| C | -5.46539000 | -1.27281900 | 0.78303500  |
| C | -5.01487100 | 0.94136200  | -0.12255900 |
| C | -6.61696100 | -0.78020500 | 1.38650400  |
| H | -5.18088100 | -2.31455000 | 0.87928400  |
| C | -6.17273800 | 1.41520900  | 0.49135100  |
| H | -4.38517800 | 1.59129900  | -0.71933700 |
| C | -6.98778900 | 0.56674700  | 1.25099000  |
| H | -7.24091700 | -1.44899400 | 1.97251200  |
| H | -6.44756400 | 2.45980300  | 0.37791500  |
| C | -8.25385700 | 1.07837600  | 1.88961800  |
| H | -8.41039200 | 0.63234300  | 2.87618200  |
| H | -8.23359800 | 2.16521500  | 2.00358200  |
| H | -9.12751000 | 0.82635200  | 1.27659200  |

**subsequent hydrolysis (H<sub>2</sub>O molecule is opposite the counterion OTs<sup>-</sup>)**

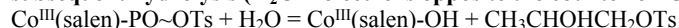

Charge: 0

Spin Multiplicity: 3

Sum of electronic and thermal Free Energies (a.u.): -2343.337794

Thermal correction to Gibbs Free Energy (a.u.): 0.538632

No imaginary frequency

Calculation of single point energy based on the optimized structure, Er = -3582.4014118 a.u.

|    |             |             |             |
|----|-------------|-------------|-------------|
| C  | -0.81552100 | 5.42005200  | -0.12607100 |
| C  | -1.48064000 | 5.06730300  | -1.32065100 |
| C  | 0.08007300  | 4.56128900  | 0.47762700  |
| H  | -1.01474400 | 6.38569000  | 0.33091100  |
| C  | -1.21945600 | 3.84042900  | -1.89012900 |
| H  | -2.18795000 | 5.75084700  | -1.77744300 |
| C  | 0.36603100  | 3.28696400  | -0.08425300 |
| H  | 0.58952100  | 4.82356700  | 1.39844400  |
| C  | -0.29593400 | 2.93936900  | -1.30570200 |
| H  | -1.72674000 | 3.53650700  | -2.80192000 |
| O  | 1.19231300  | 2.50452600  | 0.54944000  |
| C  | -0.09810700 | 1.67009900  | -1.92414200 |
| Co | 1.92576700  | 0.88164700  | -0.04537100 |
| N  | 0.74584900  | 0.76526800  | -1.53044200 |
| H  | -0.73723300 | 1.44177800  | -2.77317700 |
| N  | 2.83375100  | -0.59946300 | -0.89162300 |
| C  | 0.75501000  | -0.60099000 | -2.07724300 |
| C  | 3.72865400  | -1.30788700 | -0.29204000 |
| C  | 2.23154300  | -1.00126700 | -2.17492700 |
| C  | 0.01626000  | -0.83703400 | -3.39095400 |
| H  | 4.05266600  | -2.24127900 | -0.74865200 |
| C  | 4.36852100  | -0.94493700 | 0.93904000  |
| C  | 2.37372900  | -2.47598600 | -2.55659800 |
| C  | 0.13839300  | -2.32043700 | -3.76806200 |
| H  | 0.44621800  | -0.20448600 | -4.18054300 |
| H  | -1.03941600 | -0.57640600 | -3.28432400 |

|   |             |             |             |
|---|-------------|-------------|-------------|
| C | 5.27020400  | -1.85853200 | 1.52795300  |
| C | 4.18798100  | 0.34880600  | 1.51723600  |
| C | 1.60412800  | -2.76149400 | -3.85606900 |
| H | 3.42940200  | -2.73370900 | -2.69964400 |
| H | 1.99001200  | -3.08063100 | -1.72665900 |
| H | -0.36944100 | -2.50078400 | -4.72140200 |
| H | -0.38820700 | -2.91301300 | -3.01109800 |
| C | 5.98204600  | -1.53266400 | 2.66639700  |
| H | 5.39442500  | -2.83401900 | 1.06367100  |
| C | 4.95562000  | 0.67154300  | 2.66303400  |
| O | 3.37030600  | 1.25670800  | 1.04290000  |
| H | 2.09073200  | -2.23416400 | -4.68873100 |
| H | 1.66534300  | -3.83060300 | -4.08559700 |
| C | 5.81942000  | -0.25091200 | 3.22562700  |
| H | 6.66251000  | -2.24723500 | 3.11663500  |
| H | 4.82381000  | 1.66019800  | 3.08890800  |
| H | 6.37989500  | 0.02050000  | 4.11601300  |
| H | 2.69184300  | -0.37117400 | -2.95153700 |
| H | 0.29925000  | -1.22064700 | -1.29556100 |
| O | 1.47831200  | -3.06328200 | 0.62723500  |
| H | 2.06736600  | -3.23225400 | 1.37214100  |
| H | 1.23492900  | -2.11262100 | 0.75039000  |
| C | 0.02264100  | -0.08880000 | 1.95509600  |
| C | -1.29543200 | 0.20338100  | 1.22846000  |
| O | 1.00966200  | -0.43584300 | 1.03352500  |
| H | 0.27341600  | 0.85070800  | 2.47701400  |
| H | -1.19249100 | 1.06983100  | 0.57642300  |
| H | -2.12079900 | 0.36512200  | 1.93198300  |
| C | -0.12591900 | -1.21115200 | 2.98805700  |
| H | 0.82147400  | -1.33935500 | 3.51902900  |
| H | -0.90690900 | -0.98206900 | 3.72187700  |
| H | -0.36891500 | -2.15121800 | 2.48592200  |
| O | -2.68458400 | 0.48645000  | -1.34618200 |
| O | -1.60072200 | -0.96398300 | 0.40910100  |
| S | -2.76272300 | -0.83278500 | -0.70914500 |
| O | -2.64075900 | -2.04805300 | -1.50610300 |
| C | -4.25030100 | -0.89615200 | 0.26031400  |
| C | -4.72679900 | -2.13624200 | 0.69002200  |
| C | -4.88661800 | 0.29170900  | 0.61762800  |
| C | -5.86344700 | -2.17645200 | 1.48976800  |
| H | -4.21505900 | -3.04427200 | 0.39162200  |
| C | -6.02365700 | 0.22926000  | 1.42097700  |
| H | -4.49915800 | 1.23896000  | 0.26037500  |
| C | -6.52766100 | -0.99891500 | 1.86682200  |
| H | -6.24426500 | -3.13571900 | 1.82862000  |
| H | -6.52806100 | 1.14843600  | 1.70449900  |
| C | -7.77445600 | -1.06227500 | 2.71196900  |
| H | -7.69508900 | -1.83634700 | 3.48093900  |
| H | -7.97228900 | -0.10733000 | 3.20556400  |
| H | -8.64943400 | -1.30399600 | 2.09666000  |

**subsequent hydrolysis (H<sub>2</sub>O molecule is opposite the counterion OTs<sup>-</sup>)**

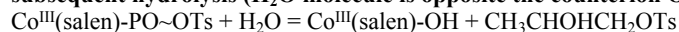

Charge: 0

Spin Multiplicity: 3

Sum of electronic and thermal Free Energies (a.u.): -2343.340564

Thermal correction to Gibbs Free Energy (a.u.): 0.540226

No imaginary frequency

Calculation of single point energy based on the optimized structure, Ep = -3582.4031763 a.u.

|   |             |            |             |
|---|-------------|------------|-------------|
| C | 1.01115400  | 5.56545800 | -0.17757100 |
| C | -0.25385600 | 5.24066400 | -0.70216300 |
| C | 1.97399200  | 4.59350200 | 0.03478100  |
| H | 1.23869100  | 6.59887400 | 0.07023000  |
| C | -0.52738900 | 3.92465300 | -1.02218600 |
| H | -1.00076400 | 6.01202300 | -0.85481500 |
| C | 1.70886000  | 3.23335500 | -0.25371600 |
| H | 2.94941000  | 4.83853700 | 0.44074800  |
| C | 0.43233400  | 2.91095000 | -0.80589100 |
| H | -1.49306100 | 3.64185600 | -1.43118700 |
| O | 2.64697000  | 2.34656600 | -0.01774900 |

|    |             |             |             |
|----|-------------|-------------|-------------|
| C  | 0.12665900  | 1.57794000  | -1.22910000 |
| Co | 2.40548100  | 0.49941400  | 0.11720500  |
| N  | 0.85230000  | 0.53857400  | -0.98211700 |
| H  | -0.78458800 | 1.44992700  | -1.80851400 |
| N  | 2.84219600  | -1.09051500 | -0.91372800 |
| C  | 0.51932400  | -0.80502500 | -1.47053900 |
| C  | 3.86560000  | -1.85668300 | -0.68513400 |
| C  | 1.84623100  | -1.40467100 | -1.95723500 |
| C  | -0.55544900 | -0.90801100 | -2.55018400 |
| H  | 3.97700200  | -2.76240400 | -1.28333600 |
| C  | 4.88428200  | -1.63597200 | 0.28678200  |
| C  | 1.66670300  | -2.88345300 | -2.30772200 |
| C  | -0.75619000 | -2.38731800 | -2.91067300 |
| H  | -0.24921300 | -0.34054900 | -3.44028200 |
| H  | -1.49449400 | -0.48031600 | -2.19592000 |
| C  | 5.92535800  | -2.59455800 | 0.38911400  |
| C  | 4.89188400  | -0.48344800 | 1.14177000  |
| C  | 0.55483300  | -3.04531000 | -3.35705200 |
| H  | 2.59497300  | -3.31242600 | -2.69958300 |
| H  | 1.40918100  | -3.43243300 | -1.39305800 |
| H  | -1.51103000 | -2.47923000 | -3.69913800 |
| H  | -1.14756900 | -2.91499000 | -2.03112200 |
| C  | 6.95417900  | -2.44871000 | 1.29163700  |
| H  | 5.89373500  | -3.45904100 | -0.26994400 |
| C  | 5.97162200  | -0.35935100 | 2.06122500  |
| O  | 3.99015700  | 0.45134700  | 1.13060900  |
| H  | 0.88480400  | -2.58812800 | -4.29979700 |
| H  | 0.39899500  | -4.10964200 | -3.56337200 |
| C  | 6.96581000  | -1.31188700 | 2.13020900  |
| H  | 7.74270400  | -3.19003500 | 1.35927800  |
| H  | 5.97705400  | 0.51629900  | 2.70111600  |
| H  | 7.77397800  | -1.18402900 | 2.84531600  |
| H  | 2.14881300  | -0.85340800 | -2.86100700 |
| H  | 0.18444500  | -1.37161500 | -0.59202000 |
| O  | 1.40079600  | 0.02738600  | 1.63087500  |
| H  | 2.03567300  | 0.05778800  | 2.36098100  |
| H  | 0.41844200  | -1.28301400 | 1.55827700  |
| C  | -1.47112900 | -1.47944900 | 2.03070500  |
| C  | -1.74931600 | -0.01250900 | 1.70522200  |
| O  | -0.29978100 | -1.95837900 | 1.40741500  |
| H  | -1.35724200 | -1.49641500 | 3.13158100  |
| H  | -0.86028600 | 0.59596100  | 1.87774500  |
| H  | -2.58057800 | 0.36026100  | 2.30913100  |
| C  | -2.62377200 | -2.39968500 | 1.64641300  |
| H  | -2.38915500 | -3.42452700 | 1.94421800  |
| H  | -3.55809300 | -2.09477500 | 2.12809000  |
| H  | -2.77049100 | -2.37909800 | 0.56395300  |
| O  | -3.29586200 | 2.28943800  | 0.73719100  |
| O  | -2.07972900 | 0.11895100  | 0.28439400  |
| S  | -3.29122200 | 1.11561200  | -0.13145100 |
| O  | -3.14616900 | 1.24766700  | -1.58186200 |
| C  | -4.72421800 | 0.12783300  | 0.22582400  |
| C  | -5.06349400 | -0.91309700 | -0.64112600 |
| C  | -5.43387500 | 0.35246100  | 1.40348400  |
| C  | -6.12874000 | -1.74158800 | -0.31043200 |
| H  | -4.49969200 | -1.06109000 | -1.55522800 |
| C  | -6.49831400 | -0.49117200 | 1.71859300  |
| H  | -5.15740200 | 1.17784200  | 2.04944200  |
| C  | -6.85842900 | -1.54758500 | 0.87341800  |
| H  | -6.40032200 | -2.55520700 | -0.97696800 |
| H  | -7.05770000 | -0.32528700 | 2.63459000  |
| C  | -8.02209300 | -2.44547900 | 1.20773100  |
| H  | -7.79490500 | -3.49124100 | 0.97989900  |
| H  | -8.29074000 | -2.37555200 | 2.26472100  |
| H  | -8.90691700 | -2.17023200 | 0.62149700  |

**subsequent hydrolysis (H<sub>2</sub>O molecule is at the same side with the ion OTs)**

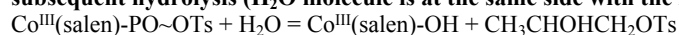

Charge: 0

Spin Multiplicity: 3

Sum of electronic and thermal Free Energies (a.u.): -2343.312024

Thermal correction to Gibbs Free Energy (a.u.): 0.540446

Imaginary frequencies: -856.77

Calculation of single point energy based on the optimized structure, Et = -3582.3721146 a.u.

|    |             |             |             |
|----|-------------|-------------|-------------|
| C  | -2.71311700 | 0.57046600  | 4.11985000  |
| C  | -2.77901600 | 1.97762800  | 4.04118700  |
| C  | -1.92581900 | -0.15862700 | 3.25121300  |
| H  | -3.29375300 | 0.04849000  | 4.87544900  |
| C  | -2.02676400 | 2.62278200  | 3.08110000  |
| H  | -3.40209800 | 2.53946700  | 4.72812100  |
| C  | -1.15533400 | 0.47560600  | 2.23800400  |
| H  | -1.88152900 | -1.24114500 | 3.30062500  |
| C  | -1.20024800 | 1.90938100  | 2.18095000  |
| H  | -2.05743900 | 3.70708500  | 3.00116100  |
| O  | -0.51719800 | -0.28380800 | 1.39472200  |
| C  | -0.51521900 | 2.64256000  | 1.15749300  |
| Co | 0.97270700  | 0.25869100  | 0.36389600  |
| N  | 0.36651700  | 2.13430300  | 0.36400700  |
| H  | -0.79128700 | 3.69386100  | 1.04240000  |
| N  | 2.50714700  | 0.99275900  | -0.52260700 |
| C  | 0.88307300  | 2.78173900  | -0.84182100 |
| C  | 3.66792200  | 0.42136500  | -0.51718400 |
| C  | 2.36384600  | 2.39835600  | -0.95353200 |
| C  | 0.70562300  | 4.28832900  | -1.00365900 |
| H  | 4.48297200  | 0.90104200  | -1.06509500 |
| C  | 4.00114200  | -0.74606900 | 0.23953600  |
| C  | 2.87301100  | 2.73190700  | -2.35751000 |
| C  | 1.24628500  | 4.70128500  | -2.38516000 |
| H  | 1.23936200  | 4.82259700  | -0.20588000 |
| H  | -0.35210200 | 4.56439100  | -0.92906400 |
| C  | 5.20902200  | -1.42726100 | -0.02141000 |
| C  | 3.19170100  | -1.12505000 | 1.35862600  |
| C  | 2.69418600  | 4.23879100  | -2.60974600 |
| H  | 3.92769400  | 2.46071800  | -2.46980800 |
| H  | 2.30515900  | 2.14164000  | -3.08610100 |
| H  | 1.17684700  | 5.78760900  | -2.50394400 |
| H  | 0.60419100  | 4.25779700  | -3.15695300 |
| C  | 5.61561700  | -2.48685700 | 0.76658600  |
| H  | 5.81304500  | -1.11009600 | -0.86796300 |
| C  | 3.65144400  | -2.19071800 | 2.17060400  |
| O  | 2.07221700  | -0.52617300 | 1.67721900  |
| H  | 3.35898500  | 4.79241500  | -1.93287600 |
| H  | 3.01086400  | 4.48524900  | -3.62848300 |
| C  | 4.82541300  | -2.85868800 | 1.87155600  |
| H  | 6.53426500  | -3.01903500 | 0.54516800  |
| H  | 3.03923400  | -2.47014300 | 3.02114600  |
| H  | 5.14226000  | -3.68491300 | 2.50187600  |
| C  | 0.82127900  | -2.87365500 | -0.22351700 |
| C  | -0.69381000 | -3.00877600 | -0.09689700 |
| O  | 1.22097900  | -1.61719700 | -0.71540400 |
| H  | 1.19540100  | -2.97611600 | 0.80748000  |
| H  | -1.07968500 | -2.19621500 | 0.51970200  |
| H  | -0.96639200 | -3.97338400 | 0.33851700  |
| C  | 1.44381400  | -3.97543400 | -1.08295000 |
| H  | 2.52977300  | -3.85231400 | -1.09382900 |
| H  | 1.20497900  | -4.96906900 | -0.68742500 |
| H  | 1.07157000  | -3.90955900 | -2.10842500 |
| H  | 2.92004100  | 3.00581000  | -0.22343000 |
| H  | 0.36393200  | 2.26357100  | -1.65713400 |
| O  | -0.08520500 | 0.12876700  | -1.47253300 |
| H  | -1.01665500 | 0.01852700  | -1.24221200 |
| H  | 0.45365600  | -0.95520000 | -1.33097300 |
| O  | -3.19403400 | -3.13228900 | -2.93217600 |
| O  | -1.27332000 | -2.92396400 | -1.43374200 |
| S  | -2.89939000 | -2.89324300 | -1.52612600 |
| O  | -3.45343000 | -3.73318800 | -0.46469400 |
| C  | -3.27375900 | -1.19145800 | -1.14622700 |
| C  | -3.59623000 | -0.82538700 | 0.15918700  |
| C  | -3.17842600 | -0.23634400 | -2.16245200 |

|   |             |             |             |
|---|-------------|-------------|-------------|
| C | -3.80918600 | 0.52042900  | 0.45298600  |
| H | -3.67159300 | -1.58344300 | 0.92935800  |
| C | -3.38348500 | 1.10353600  | -1.84786500 |
| H | -2.93278800 | -0.54739900 | -3.17102300 |
| C | -3.69176000 | 1.50125200  | -0.53769200 |
| H | -4.04142100 | 0.81338700  | 1.47128500  |
| H | -3.29389300 | 1.85355000  | -2.62873000 |
| C | -3.89809000 | 2.95773900  | -0.20743000 |
| H | -3.12716000 | 3.58048000  | -0.67425400 |
| H | -4.86667900 | 3.31393800  | -0.57740200 |
| H | -3.86700000 | 3.12406900  | 0.87168000  |

**subsequent hydrolysis (H<sub>2</sub>O molecule is at the same side with the ion OTs<sup>-</sup>)**

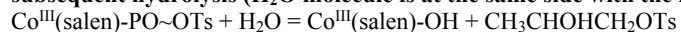

Charge: 0

Spin Multiplicity: 3

Sum of electronic and thermal Free Energies (a.u.): -2343.341761

Thermal correction to Gibbs Free Energy (a.u.): 0.542012

No imaginary frequency

Calculation of single point energy based on the optimized structure, Er = -3582.4079568 a.u.

|    |             |             |             |
|----|-------------|-------------|-------------|
| C  | -2.23287800 | -3.05967500 | 3.75912000  |
| C  | -3.22412200 | -2.05783800 | 3.66600900  |
| C  | -0.96147400 | -2.85914100 | 3.26249400  |
| H  | -2.47449300 | -4.00749400 | 4.23219200  |
| C  | -2.90461000 | -0.86182700 | 3.06239900  |
| H  | -4.21736300 | -2.22971900 | 4.06623100  |
| C  | -0.60652300 | -1.63908900 | 2.62358200  |
| H  | -0.19448800 | -3.62235600 | 3.33577400  |
| C  | -1.61281200 | -0.62566100 | 2.52955000  |
| H  | -3.64599800 | -0.07171100 | 2.98144600  |
| O  | 0.60610000  | -1.51021300 | 2.17034300  |
| C  | -1.35597600 | 0.63018000  | 1.90754900  |
| Co | 1.33284800  | -0.07617900 | 1.20393100  |
| N  | -0.23520500 | 1.00572200  | 1.37174200  |
| H  | -2.19615100 | 1.32061600  | 1.87283300  |
| N  | 2.15393000  | 1.52066300  | 0.53258400  |
| C  | -0.13753100 | 2.25013900  | 0.58798300  |
| C  | 3.27469000  | 1.51096900  | -0.11130700 |
| C  | 1.31853100  | 2.71983700  | 0.67532700  |
| C  | -1.07381300 | 3.39519000  | 0.97365200  |
| H  | 3.58986900  | 2.41721600  | -0.62736300 |
| C  | 4.17544600  | 0.40128300  | -0.16418300 |
| C  | 1.56611700  | 3.85331400  | -0.32159900 |
| C  | -0.85844900 | 4.56452000  | 0.00029000  |
| H  | -0.86937600 | 3.70909300  | 2.00628500  |
| H  | -2.11814100 | 3.07945500  | 0.93034500  |
| C  | 5.31345200  | 0.48501800  | -0.99844000 |
| C  | 4.00755900  | -0.72624300 | 0.70015100  |
| C  | 0.60643400  | 5.01788800  | -0.02869700 |
| H  | 2.59783300  | 4.21425900  | -0.25334800 |
| H  | 1.40645400  | 3.45946700  | -1.33240700 |
| H  | -1.50843900 | 5.40256100  | 0.27388600  |
| H  | -1.15630800 | 4.24314900  | -1.00601200 |
| C  | 6.27088800  | -0.50888100 | -1.00615400 |
| H  | 5.41812100  | 1.35263400  | -1.64509500 |
| C  | 5.02798000  | -1.71034800 | 0.70550000  |
| O  | 2.97846900  | -0.89344200 | 1.49002500  |
| H  | 0.86502100  | 5.46146900  | 0.94244100  |
| H  | 0.74332400  | 5.80420700  | -0.77817300 |
| C  | 6.11979800  | -1.60718200 | -0.13617900 |
| H  | 7.13108200  | -0.44293800 | -1.66318400 |
| H  | 4.90194700  | -2.55573800 | 1.37288600  |
| H  | 6.87235100  | -2.39075800 | -0.12783600 |
| C  | 1.02740400  | -2.01515800 | -0.90119400 |
| C  | -0.36964600 | -2.37301500 | -1.40155000 |
| O  | 1.03524300  | -0.65017400 | -0.58594600 |
| H  | 1.19413200  | -2.62379800 | 0.00085800  |
| H  | -1.10446600 | -2.11100400 | -0.63406900 |
| H  | -0.47251500 | -3.42664400 | -1.67604700 |
| C  | 2.11501100  | -2.33414200 | -1.93158200 |



|   |             |             |             |
|---|-------------|-------------|-------------|
| H | 3.09664000  | -2.09880300 | -1.51603200 |
| H | 2.09859100  | -3.39425100 | -2.20868200 |
| H | 1.96615100  | -1.73551400 | -2.83379200 |
| H | 1.48723600  | 3.09108300  | 1.69838500  |
| H | -0.32389700 | 1.96207000  | -0.45494000 |
| O | 0.46315400  | 1.28279900  | -2.40869100 |
| H | 0.16867300  | 0.84857700  | -3.21971500 |
| H | 0.68651900  | 0.52785800  | -1.80937400 |
| O | -1.93850300 | -0.54176100 | -4.31455600 |
| O | -0.59135300 | -1.55596300 | -2.58251700 |
| S | -2.10195200 | -1.39289700 | -3.14111600 |
| O | -2.73467800 | -2.70811800 | -3.21671400 |
| C | -2.92841500 | -0.45681800 | -1.86839000 |
| C | -3.75548500 | -1.11483000 | -0.96078300 |
| C | -2.77315200 | 0.93112800  | -1.83610200 |
| C | -4.44140700 | -0.36733600 | -0.00415100 |
| H | -3.87151300 | -2.19062400 | -1.02142000 |
| C | -3.48928000 | 1.66064200  | -0.89426500 |
| H | -2.09871200 | 1.41909900  | -2.52789000 |
| C | -4.32922400 | 1.02642500  | 0.03553900  |
| H | -5.07834200 | -0.87564200 | 0.71276800  |
| H | -3.40537100 | 2.74344200  | -0.88831500 |
| C | -5.09249300 | 1.83951500  | 1.05106600  |
| H | -4.41807100 | 2.43127800  | 1.68208900  |
| H | -5.76930300 | 2.54785400  | 0.56121200  |
| H | -5.69128900 | 1.20187500  | 1.70613900  |

**subsequent hydrolysis (H<sub>2</sub>O molecule is at the same side with the ion OTs)**

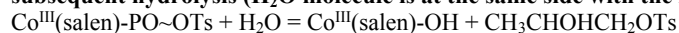

Charge: 0

Spin Multiplicity: 3

Sum of electronic and thermal Free Energies (a.u.): -2343.326529

Thermal correction to Gibbs Free Energy (a.u.): 0.541886

No imaginary frequency

Calculation of single point energy based on the optimized structure,  $E_p = -3582.3918966$  a.u.

|    |             |             |             |
|----|-------------|-------------|-------------|
| C  | -3.52018800 | -0.62860800 | 3.26736000  |
| C  | -3.97333900 | 0.70902500  | 3.21902300  |
| C  | -2.37550200 | -1.02417000 | 2.60840500  |
| H  | -4.09006800 | -1.36524200 | 3.82700500  |
| C  | -3.25067400 | 1.63003500  | 2.49316400  |
| H  | -4.87653100 | 1.00201200  | 3.74316500  |
| C  | -1.59873800 | -0.09201100 | 1.86537600  |
| H  | -2.04364000 | -2.05584000 | 2.60640100  |
| C  | -2.05953600 | 1.26621600  | 1.81767000  |
| H  | -3.58342100 | 2.66373600  | 2.43193800  |
| O  | -0.54551900 | -0.53240700 | 1.24340900  |
| C  | -1.39976500 | 2.23942200  | 1.01208700  |
| Co | 0.86864300  | 0.51715400  | 0.58866100  |
| N  | -0.23599000 | 2.07714000  | 0.46281000  |
| H  | -1.93330000 | 3.17573200  | 0.83922900  |
| N  | 2.29302300  | 1.71667200  | 0.10822800  |
| C  | 0.33961300  | 2.97259100  | -0.54147400 |
| C  | 3.54358400  | 1.38609600  | 0.07972000  |
| C  | 1.83312000  | 3.08068300  | -0.20440900 |
| C  | -0.29648000 | 4.34843200  | -0.71555200 |
| H  | 4.26542500  | 2.11497900  | -0.29260600 |
| C  | 4.08338400  | 0.14739500  | 0.54375300  |
| C  | 2.57854500  | 3.81329200  | -1.32252000 |
| C  | 0.44516500  | 5.11377400  | -1.82340400 |
| H  | -0.24519000 | 4.90659700  | 0.22923900  |
| H  | -1.35535500 | 4.24905000  | -0.97865600 |
| C  | 5.45731800  | -0.11708200 | 0.34094400  |
| C  | 3.28434100  | -0.77725600 | 1.28154900  |
| C  | 1.95177400  | 5.19900400  | -1.54662600 |
| H  | 3.63832900  | 3.93152700  | -1.07683600 |
| H  | 2.52110300  | 3.21013600  | -2.23697800 |
| H  | 0.02247000  | 6.11822600  | -1.92949200 |
| H  | 0.28135300  | 4.59994200  | -2.77953700 |
| C  | 6.04676000  | -1.26028600 | 0.83893100  |
| H  | 6.04578000  | 0.60177700  | -0.22420300 |

|   |             |             |             |
|---|-------------|-------------|-------------|
| C | 3.92036700  | -1.92273100 | 1.81589900  |
| O | 2.00587500  | -0.61009800 | 1.51923000  |
| H | 2.12073400  | 5.81624800  | -0.65391600 |
| H | 2.45935300  | 5.70340000  | -2.37528300 |
| C | 5.26169700  | -2.16113800 | 1.58582700  |
| H | 7.09836300  | -1.46090700 | 0.66598300  |
| H | 3.30939000  | -2.61373000 | 2.38619500  |
| H | 5.71815300  | -3.06083300 | 1.98923600  |
| C | 1.82811300  | -3.34965600 | -1.05009100 |
| C | 0.52525500  | -3.20854600 | -0.26303300 |
| O | 2.51733200  | -2.13414400 | -1.25267500 |
| H | 2.47370000  | -3.95784500 | -0.39705300 |
| H | 0.64323300  | -2.57351200 | 0.61565800  |
| H | 0.14972800  | -4.18986800 | 0.03210100  |
| C | 1.61780400  | -4.09917000 | -2.36849200 |
| H | 2.57885500  | -4.22006100 | -2.87413200 |
| H | 1.17853200  | -5.08950300 | -2.20265900 |
| H | 0.94704300  | -3.53639400 | -3.02251000 |
| H | 1.91630400  | 3.66795200  | 0.72367900  |
| H | 0.26694000  | 2.41281300  | -1.48448800 |
| O | 0.76654700  | -0.04616300 | -1.21537300 |
| H | 0.04766600  | -0.69607900 | -1.21310700 |
| H | 1.89054600  | -1.38289700 | -1.37547600 |
| O | -2.34703100 | -3.74244900 | -2.27399100 |
| O | -0.47205900 | -2.56527400 | -1.12868600 |
| S | -2.03745300 | -3.01975000 | -1.04329300 |
| O | -2.29833700 | -3.64201200 | 0.25630300  |
| C | -2.80209000 | -1.40994000 | -1.08566900 |
| C | -3.87566800 | -1.17284400 | -0.22762900 |
| C | -2.35355000 | -0.43055900 | -1.97007000 |
| C | -4.49127800 | 0.07427300  | -0.24394500 |
| H | -4.19842500 | -1.94741000 | 0.45601900  |
| C | -2.96198000 | 0.82282800  | -1.94815300 |
| H | -1.53006800 | -0.62660900 | -2.64582400 |
| C | -4.03027700 | 1.09482200  | -1.08536800 |
| H | -5.31227600 | 0.27024600  | 0.43782900  |
| H | -2.59783400 | 1.60021100  | -2.61396300 |
| C | -4.65948900 | 2.46345900  | -1.03287700 |
| H | -4.20909000 | 3.14180500  | -1.76260700 |
| H | -5.73500500 | 2.41765900  | -1.23443200 |
| H | -4.54029500 | 2.90510800  | -0.03645800 |

five-coordinated Co<sup>III</sup>(salen)-OTs counterion addition in the middle carbon and subsequent hydrolysis

**Co<sup>III</sup>(salen)-OTs counterion addition in the middle carbon**

Co<sup>III</sup>(salen)-OTs + PO = Co<sup>III</sup>(salen)-PO-OTs

Charge: 0

Spin Multiplicity: 3

Sum of electronic and thermal Free Energies (a.u.): -2266.850109

Thermal correction to Gibbs Free Energy (a.u.): 0.512973

Imaginary frequencies: -305.86

Calculation of single point energy based on the optimized structure, Et = -3505.8587696 a.u.

|    |             |             |             |
|----|-------------|-------------|-------------|
| C  | 2.19049400  | -4.05794100 | -1.45900800 |
| C  | 3.12973400  | -3.02601700 | -1.64868500 |
| C  | 0.85721000  | -3.77892800 | -1.21396600 |
| H  | 2.51667900  | -5.09378600 | -1.49554700 |
| C  | 2.70204500  | -1.71419100 | -1.60399300 |
| H  | 4.17531700  | -3.25723200 | -1.82000500 |
| C  | 0.39972400  | -2.44002400 | -1.13441400 |
| H  | 0.13055600  | -4.56801300 | -1.05383700 |
| C  | 1.34638700  | -1.39865700 | -1.36368800 |
| H  | 3.40942300  | -0.90059500 | -1.72902300 |
| O  | -0.85763100 | -2.23034200 | -0.82821300 |
| C  | 0.96658500  | -0.02419200 | -1.30723500 |
| Co | -1.73614900 | -0.60597700 | -0.61898300 |
| N  | -0.23396700 | 0.42372600  | -1.12310600 |
| H  | 1.77134100  | 0.69602700  | -1.42876600 |
| N  | -2.72413600 | 1.02949700  | -0.86993500 |
| C  | -0.47737500 | 1.84200900  | -0.81913000 |
| C  | -3.95891400 | 1.19287700  | -0.51824200 |

|   |             |             |             |
|---|-------------|-------------|-------------|
| C | -1.88164000 | 2.14674300  | -1.34288200 |
| C | 0.55331200  | 2.84667600  | -1.32373000 |
| H | -4.38691000 | 2.19366000  | -0.57867400 |
| C | -4.84030900 | 0.16260300  | -0.06694400 |
| C | -2.32341500 | 3.55221000  | -0.93235300 |
| C | 0.12034300  | 4.26036900  | -0.91325300 |
| H | 0.65210300  | 2.77037900  | -2.41587300 |
| H | 1.52162700  | 2.63871500  | -0.86695500 |
| C | -6.14950400 | 0.51994900  | 0.33452300  |
| C | -4.45403300 | -1.21399600 | -0.08361600 |
| C | -1.29261400 | 4.58927600  | -1.40765600 |
| H | -3.30486800 | 3.79442400  | -1.35434700 |
| H | -2.41492300 | 3.58735700  | 0.16073300  |
| H | 0.83561400  | 4.99263900  | -1.30183600 |
| H | 0.16709500  | 4.32520900  | 0.18001900  |
| C | -7.06733600 | -0.43477300 | 0.71933500  |
| H | -6.42064700 | 1.57283700  | 0.33596400  |
| C | -5.42527200 | -2.17734700 | 0.29242900  |
| O | -3.27206700 | -1.63770500 | -0.44466800 |
| H | -1.29760400 | 4.61944700  | -2.50598300 |
| H | -1.59625600 | 5.58465100  | -1.06664500 |
| C | -6.69123000 | -1.79346400 | 0.68984000  |
| H | -8.06468200 | -0.14788400 | 1.03394500  |
| H | -5.12891200 | -3.22019000 | 0.26428700  |
| H | -7.40891800 | -2.55375700 | 0.98519400  |
| C | -0.12686100 | -0.95192900 | 2.63695400  |
| C | -1.53420000 | -1.16929400 | 2.23627100  |
| O | -1.53490700 | -0.14339600 | 1.28143900  |
| H | 0.10749300  | -0.10001800 | 3.26273600  |
| H | -2.25102600 | -0.99002700 | 3.05329500  |
| H | -1.71175500 | -2.16680900 | 1.81140900  |
| C | 0.89808600  | -1.97958000 | 2.41342700  |
| H | 0.87328000  | -2.34469700 | 1.38387000  |
| H | 1.89256000  | -1.63533500 | 2.68086400  |
| H | 0.60348900  | -2.83725700 | 3.04502700  |
| H | -1.85584900 | 2.08163300  | -2.44111300 |
| H | -0.49100100 | 1.88215600  | 0.27725100  |
| O | 2.12536900  | 2.71751700  | 1.67102800  |
| O | 1.17138500  | 0.46080400  | 1.28651000  |
| S | 2.27331600  | 1.27145600  | 1.94548400  |
| O | 2.46481900  | 0.85446800  | 3.35328000  |
| C | 3.73819300  | 0.74761400  | 1.03527800  |
| C | 4.36084500  | -0.46110800 | 1.34905800  |
| C | 4.19150800  | 1.50479600  | -0.04419500 |
| C | 5.41699900  | -0.91921100 | 0.56685200  |
| H | 4.02635600  | -1.02706600 | 2.21080100  |
| C | 5.25020200  | 1.03642800  | -0.82387500 |
| H | 3.72626700  | 2.46292500  | -0.24715400 |
| C | 5.87480300  | -0.18352900 | -0.53565300 |
| H | 5.89500900  | -1.86398100 | 0.81240500  |
| H | 5.60190900  | 1.63029800  | -1.66371100 |
| C | 7.03229200  | -0.68049900 | -1.36596000 |
| H | 6.99951000  | -1.76790400 | -1.48641200 |
| H | 7.03416000  | -0.22760200 | -2.36131600 |
| H | 7.99112400  | -0.43667600 | -0.89246800 |

**Co<sup>III</sup>(salen)-OTs counterion addition in the middle carbon**

Co<sup>III</sup>(salen)-OTs + PO = Co<sup>III</sup>(salen)-PO-OTs

Charge: 0

Spin Multiplicity: 3

Sum of electronic and thermal Free Energies (a.u.): -2266.868235

Thermal correction to Gibbs Free Energy (a.u.): 0.518527

No imaginary frequency

Calculation of single point energy based on the optimized structure, Er = -3505.9046634 a.u.

|   |            |             |             |
|---|------------|-------------|-------------|
| C | 2.27948800 | -3.99699500 | -1.51061700 |
| C | 3.21960500 | -2.94859800 | -1.54066400 |
| C | 0.92870000 | -3.74402800 | -1.35012300 |
| H | 2.61891300 | -5.02471700 | -1.60444700 |
| C | 2.78269400 | -1.64429200 | -1.42366700 |
| H | 4.27735300 | -3.16074400 | -1.64834200 |

|    |             |             |             |
|----|-------------|-------------|-------------|
| C  | 0.46191600  | -2.41728600 | -1.20152000 |
| H  | 0.19810400  | -4.54427500 | -1.31010700 |
| C  | 1.40907100  | -1.35427600 | -1.26698900 |
| H  | 3.49150300  | -0.82372600 | -1.43351000 |
| O  | -0.82026200 | -2.23201700 | -0.98554100 |
| C  | 1.00018100  | 0.00911500  | -1.18730800 |
| Co | -1.72090600 | -0.65307100 | -0.71968200 |
| N  | -0.22946500 | 0.42591600  | -1.10797500 |
| H  | 1.78771100  | 0.75399300  | -1.23244000 |
| N  | -2.72967100 | 0.96548900  | -0.80599800 |
| C  | -0.50199700 | 1.86393400  | -0.90287900 |
| C  | -3.93154400 | 1.10608000  | -0.34581600 |
| C  | -1.94515300 | 2.09113200  | -1.35037000 |
| C  | 0.43447800  | 2.84085900  | -1.61343400 |
| H  | -4.36442700 | 2.10575500  | -0.32655100 |
| C  | -4.76829500 | 0.04363000  | 0.11879700  |
| C  | -2.41283000 | 3.50068900  | -0.99198900 |
| C  | -0.00259400 | 4.27455400  | -1.28223400 |
| H  | 0.40308900  | 2.65819400  | -2.69709400 |
| H  | 1.45330100  | 2.71882700  | -1.24549000 |
| C  | -6.03548400 | 0.35897700  | 0.66231700  |
| C  | -4.38453600 | -1.32461900 | -0.03601800 |
| C  | -1.47131600 | 4.53310600  | -1.63647900 |
| H  | -3.43749600 | 3.67564400  | -1.33873200 |
| H  | -2.40626300 | 3.61229500  | 0.09987900  |
| H  | 0.64092600  | 4.98416500  | -1.81189000 |
| H  | 0.17131200  | 4.43711800  | -0.21258800 |
| C  | -6.90988500 | -0.63277500 | 1.05705700  |
| H  | -6.30976900 | 1.40561300  | 0.76599300  |
| C  | -5.31222000 | -2.32431100 | 0.34953400  |
| O  | -3.22948800 | -1.70507800 | -0.52107000 |
| H  | -1.59818000 | 4.49125400  | -2.72698700 |
| H  | -1.77143600 | 5.53934200  | -1.32567800 |
| C  | -6.53701200 | -1.98220600 | 0.89031800  |
| H  | -7.87488100 | -0.37984800 | 1.48200500  |
| H  | -5.01663500 | -3.35900600 | 0.21541200  |
| H  | -7.22341800 | -2.76807900 | 1.19187500  |
| C  | -0.73069400 | -0.78392300 | 2.46653300  |
| C  | -2.19036500 | -0.96201400 | 2.47830300  |
| O  | -1.56043700 | -0.23483800 | 1.39319000  |
| H  | -0.29341900 | 0.02106700  | 3.04821200  |
| H  | -2.82586500 | -0.34094400 | 3.10467700  |
| H  | -2.60648500 | -1.92342800 | 2.18685200  |
| C  | 0.19755100  | -1.91058400 | 2.12282200  |
| H  | -0.29497000 | -2.65861100 | 1.49815700  |
| H  | 1.07056000  | -1.50627000 | 1.60891200  |
| H  | 0.53278700  | -2.38842400 | 3.05001300  |
| H  | -1.97624900 | 1.97361300  | -2.44408500 |
| H  | -0.41087200 | 2.01607200  | 0.17992700  |
| O  | 2.41365400  | 2.99927600  | 0.72908700  |
| O  | 1.27876200  | 0.87895500  | 1.35105200  |
| S  | 2.44735400  | 1.79269900  | 1.60277300  |
| O  | 2.69729300  | 2.03348000  | 3.03636300  |
| C  | 3.84178400  | 0.82173000  | 0.99479600  |
| C  | 4.11400300  | -0.42227400 | 1.57019200  |
| C  | 4.61886400  | 1.28116500  | -0.06593600 |
| C  | 5.15129000  | -1.20390300 | 1.07323500  |
| H  | 3.50759600  | -0.77069400 | 2.39948600  |
| C  | 5.66000300  | 0.48903900  | -0.55876400 |
| H  | 4.39721100  | 2.25480500  | -0.48892200 |
| C  | 5.94081900  | -0.76286100 | -0.00020100 |
| H  | 5.35170900  | -2.17614500 | 1.51662000  |
| H  | 6.26339000  | 0.85005900  | -1.38817600 |
| C  | 7.07568200  | -1.61153200 | -0.51907900 |
| H  | 6.81022200  | -2.67395400 | -0.52638800 |
| H  | 7.35811700  | -1.32408600 | -1.53589000 |
| H  | 7.96793200  | -1.50837200 | 0.11059300  |

**Co<sup>III</sup>(salen)-OTs counterion addition in the middle carbon**

Co<sup>III</sup>(salen)-OTs + PO = Co<sup>III</sup>(salen)-PO-OTs

Charge: 0

Spin Multiplicity: 3

Sum of electronic and thermal Free Energies (a.u.): -2266.911777

Thermal correction to Gibbs Free Energy (a.u.): 0.521667

No imaginary frequency

Calculation of single point energy based on the optimized structure, Ep = -3505.9161161 a.u.

|    |             |             |             |
|----|-------------|-------------|-------------|
| C  | 2.88415000  | -2.66680700 | -2.36470600 |
| C  | 3.46374600  | -1.41096300 | -2.64627900 |
| C  | 1.63039600  | -2.76717600 | -1.79815700 |
| H  | 3.43532100  | -3.57417200 | -2.59784400 |
| C  | 2.75885800  | -0.26977000 | -2.33418900 |
| H  | 4.45081600  | -1.34734200 | -3.09053700 |
| C  | 0.87163100  | -1.60636400 | -1.47855200 |
| H  | 1.17769100  | -3.72922100 | -1.58390200 |
| C  | 1.46844100  | -0.33500700 | -1.75604600 |
| H  | 3.19268500  | 0.70915300  | -2.51714100 |
| O  | -0.30906500 | -1.76631000 | -0.96096100 |
| C  | 0.80421300  | 0.88300500  | -1.42890100 |
| Co | -1.60258500 | -0.44813900 | -0.59717300 |
| N  | -0.40815600 | 0.98189600  | -0.98190600 |
| H  | 1.38324600  | 1.79631700  | -1.55245100 |
| N  | -2.96374000 | 0.92301700  | -0.63695300 |
| C  | -0.96971700 | 2.24392300  | -0.48686500 |
| C  | -4.19639000 | 0.72110000  | -0.30817100 |
| C  | -2.43115700 | 2.25755500  | -0.95285500 |
| C  | -0.24329100 | 3.53044700  | -0.86952900 |
| H  | -4.86490800 | 1.57923500  | -0.22638700 |
| C  | -4.78838700 | -0.56028300 | -0.07170300 |
| C  | -3.18506500 | 3.45193900  | -0.36584900 |
| C  | -0.99289800 | 4.73561300  | -0.28309200 |
| H  | -0.18990900 | 3.61760400  | -1.96396800 |
| H  | 0.77561900  | 3.50620300  | -0.47721400 |
| C  | -6.13231600 | -0.61528600 | 0.36436400  |
| C  | -4.08569300 | -1.77051200 | -0.36871500 |
| C  | -2.46150200 | 4.76007000  | -0.72153900 |
| H  | -4.21191800 | 3.48984100  | -0.74440400 |
| H  | -3.24109200 | 3.33392400  | 0.72386000  |
| H  | -0.49366900 | 5.66396000  | -0.58014300 |
| H  | -0.93887200 | 4.68562300  | 0.81189900  |
| C  | -6.78799100 | -1.81909500 | 0.52325700  |
| H  | -6.64549700 | 0.31981100  | 0.57670100  |
| C  | -4.79364800 | -2.99197400 | -0.22661200 |
| O  | -2.84847300 | -1.81688100 | -0.78416100 |
| H  | -2.51341400 | 4.91402700  | -1.80799800 |
| H  | -2.98408100 | 5.60514900  | -0.26091600 |
| C  | -6.10223400 | -3.01165200 | 0.21667200  |
| H  | -7.81524800 | -1.84861100 | 0.86991000  |
| H  | -4.26037400 | -3.90566200 | -0.46550100 |
| H  | -6.61007600 | -3.96553200 | 0.33089500  |
| C  | 0.30376100  | -0.82254400 | 2.73473900  |
| C  | -0.95388200 | -1.29709100 | 2.01207200  |
| O  | -1.52854000 | -0.26424800 | 1.28695700  |
| H  | 0.06941300  | 0.07712400  | 3.30871300  |
| H  | -1.64518100 | -1.66336400 | 2.79286500  |
| H  | -0.68685900 | -2.15951400 | 1.38213500  |
| C  | 0.95452900  | -1.88181700 | 3.60582900  |
| H  | 1.20592100  | -2.76337900 | 3.00703000  |
| H  | 1.86098400  | -1.49131900 | 4.07203500  |
| H  | 0.26330900  | -2.19128200 | 4.39609300  |
| H  | -2.42338400 | 2.34507900  | -2.05039700 |
| H  | -0.96381900 | 2.13914100  | 0.60580500  |
| O  | 1.65113800  | 2.02250600  | 1.26767500  |
| O  | 1.25512600  | -0.44666000 | 1.66529900  |
| S  | 2.20828200  | 0.83183400  | 1.92107800  |
| O  | 2.53261400  | 0.91676000  | 3.34743300  |
| C  | 3.62011800  | 0.29633800  | 0.98134700  |
| C  | 4.00524100  | -1.04448800 | 0.97700600  |
| C  | 4.37328300  | 1.26669000  | 0.32328500  |
| C  | 5.15599900  | -1.40970700 | 0.28910800  |

|   |            |             |             |
|---|------------|-------------|-------------|
| H | 3.39565500 | -1.78602100 | 1.47761600  |
| C | 5.53033600 | 0.88205000  | -0.35092500 |
| H | 4.04876300 | 2.30102600  | 0.33555400  |
| C | 5.93529200 | -0.45695400 | -0.38217700 |
| H | 5.44997000 | -2.45490500 | 0.26179200  |
| H | 6.12275900 | 1.63230900  | -0.86685400 |
| C | 7.15692800 | -0.88165300 | -1.15550400 |
| H | 6.86867000 | -1.37269800 | -2.09302100 |
| H | 7.78972100 | -0.02735800 | -1.40904800 |
| H | 7.75940900 | -1.59802100 | -0.58856400 |

**subsequent hydrolysis**

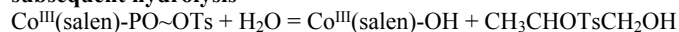

Charge: 0

Spin Multiplicity: 3

Sum of electronic and thermal Free Energies (a.u.): -2343.312013

Thermal correction to Gibbs Free Energy (a.u.): 0.538020

Imaginary frequencies: -656.00

Calculation of single point energy based on the optimized structure, Et = -3582.3665589 a.u.

|    |             |             |             |
|----|-------------|-------------|-------------|
| C  | -1.28406600 | 4.55505800  | 0.27862000  |
| C  | -2.01031700 | 4.07972300  | -0.83132300 |
| C  | -0.33592300 | 3.76915000  | 0.90588400  |
| H  | -1.46592700 | 5.56109200  | 0.64729700  |
| C  | -1.77225400 | 2.79546000  | -1.27696300 |
| H  | -2.74362600 | 4.71121600  | -1.32179800 |
| C  | -0.04959700 | 2.45374900  | 0.45424600  |
| H  | 0.22803900  | 4.13500100  | 1.75705700  |
| C  | -0.80747300 | 1.96648100  | -0.66312200 |
| H  | -2.33535000 | 2.39137900  | -2.11316200 |
| O  | 0.84242700  | 1.75601100  | 1.10506300  |
| C  | -0.68124500 | 0.61352400  | -1.12098500 |
| Co | 1.78014700  | 0.31863400  | 0.32595900  |
| N  | 0.28319400  | -0.17708600 | -0.79078700 |
| H  | -1.47234300 | 0.23791100  | -1.77179700 |
| N  | 2.65754200  | -1.11051900 | -0.58343500 |
| C  | 0.31596100  | -1.61866100 | -1.04331700 |
| C  | 3.93830500  | -1.14639700 | -0.77794900 |
| C  | 1.76680500  | -1.98548400 | -1.37057300 |
| C  | -0.60120000 | -2.20735900 | -2.11016200 |
| H  | 4.35063400  | -2.01384100 | -1.30089400 |
| C  | 4.84861000  | -0.08747000 | -0.47492200 |
| C  | 1.95020800  | -3.49479100 | -1.20741700 |
| C  | -0.45254200 | -3.73980600 | -2.06659700 |
| H  | -0.33014900 | -1.81242200 | -3.09917500 |
| H  | -1.64116900 | -1.94822700 | -1.91112400 |
| C  | 6.23926000  | -0.32992100 | -0.53095700 |
| C  | 4.36052600  | 1.25213300  | -0.30467800 |
| C  | 1.00775500  | -4.20513000 | -2.19730800 |
| H  | 2.98707100  | -3.79141500 | -1.39956500 |
| H  | 1.71657600  | -3.76766600 | -0.17210500 |
| H  | -1.05703300 | -4.19429300 | -2.85896400 |
| H  | -0.86954400 | -4.08505100 | -1.11483900 |
| C  | 7.15068200  | 0.69719700  | -0.39189700 |
| H  | 6.58248000  | -1.35090100 | -0.67964400 |
| C  | 5.32252000  | 2.29041100  | -0.20129700 |
| O  | 3.09342500  | 1.56044300  | -0.27894500 |
| H  | 1.36210000  | -4.00578300 | -3.21810000 |
| H  | 1.06723600  | -5.28916300 | -2.05334000 |
| C  | 6.67604100  | 2.01524300  | -0.23118200 |
| H  | 8.21644100  | 0.49740300  | -0.41724500 |
| H  | 4.95028600  | 3.30241200  | -0.08390600 |
| H  | 7.38736100  | 2.83071500  | -0.13230300 |
| H  | 1.94198700  | -1.72741600 | -2.42558900 |
| H  | 0.06800200  | -2.06059500 | -0.07185000 |
| O  | 2.96304100  | 0.01989400  | 2.00809700  |
| H  | 2.82473400  | 0.81777400  | 2.53719100  |
| H  | 2.06822400  | -0.67089300 | 2.17350200  |
| C  | -1.31021200 | -1.33161800 | 2.85952500  |
| C  | 0.05301200  | -0.65622600 | 2.85747900  |
| O  | 0.92063400  | -1.13727700 | 1.87467400  |

|   |             |             |             |
|---|-------------|-------------|-------------|
| H | -1.18430900 | -2.41186600 | 2.73643400  |
| H | 0.47183500  | -0.82869400 | 3.86577600  |
| H | -0.11793600 | 0.42852800  | 2.76180100  |
| C | -2.11776700 | -0.98594000 | 4.10265300  |
| H | -2.20731200 | 0.10108400  | 4.20007100  |
| H | -3.11534800 | -1.42138800 | 4.06060000  |
| H | -1.60294300 | -1.36747000 | 4.98968200  |
| O | -2.62192800 | -2.77133800 | 0.17376400  |
| O | -2.00212200 | -0.81842700 | 1.65629400  |
| S | -3.19066600 | -1.71610600 | 1.01844400  |
| O | -4.14793900 | -2.09838800 | 2.05789500  |
| C | -3.87694000 | -0.44423000 | -0.01830500 |
| C | -4.15702800 | 0.81171600  | 0.52477000  |
| C | -4.18072700 | -0.74388400 | -1.34366800 |
| C | -4.73226900 | 1.78083500  | -0.28582600 |
| H | -3.90017500 | 1.02846600  | 1.55448400  |
| C | -4.75692200 | 0.24407800  | -2.14350500 |
| H | -3.96686300 | -1.73170000 | -1.73539000 |
| C | -5.03694100 | 1.51542400  | -1.63015300 |
| H | -4.92649500 | 2.76823400  | 0.12100600  |
| H | -4.99203900 | 0.02185900  | -3.18031200 |
| C | -5.62441300 | 2.59732200  | -2.49922000 |
| H | -5.88171100 | 2.22116400  | -3.49228500 |
| H | -6.52922600 | 3.01902700  | -2.04940400 |
| H | -4.91338600 | 3.42246500  | -2.62439600 |

#### subsequent hydrolysis

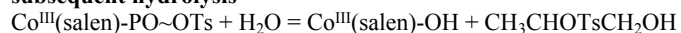

Charge: 0

Spin Multiplicity: 3

Sum of electronic and thermal Free Energies (a.u.): -2343.339792

Thermal correction to Gibbs Free Energy (a.u.): 0.540208

No imaginary frequency

Calculation of single point energy based on the optimized structure,  $E_r = -3582.403759$  a.u.

|    |             |             |             |
|----|-------------|-------------|-------------|
| C  | 3.18730300  | -2.55414600 | -2.33957700 |
| C  | 3.73132400  | -1.27405500 | -2.57644500 |
| C  | 1.90668300  | -2.70916300 | -1.84944300 |
| H  | 3.78727400  | -3.43662300 | -2.54564800 |
| C  | 2.96426700  | -0.16394600 | -2.29963500 |
| H  | 4.73994600  | -1.16707800 | -2.95944700 |
| C  | 1.08752100  | -1.58202000 | -1.56762100 |
| H  | 1.48058500  | -3.69009500 | -1.66915800 |
| C  | 1.64583500  | -0.28602300 | -1.79987100 |
| H  | 3.36853100  | 0.83280300  | -2.45041200 |
| O  | -0.11715700 | -1.79248200 | -1.12134500 |
| C  | 0.91338000  | 0.90138900  | -1.50479700 |
| Co | -1.46790600 | -0.53109200 | -0.80763100 |
| N  | -0.32266000 | 0.94753100  | -1.11930800 |
| H  | 1.45667700  | 1.83958300  | -1.59565300 |
| N  | -2.88199900 | 0.77882800  | -0.90877500 |
| C  | -0.96546600 | 2.18531000  | -0.65730500 |
| C  | -4.08701800 | 0.54472500  | -0.51054500 |
| C  | -2.39701200 | 2.13716400  | -1.20763900 |
| C  | -0.27346300 | 3.50242100  | -0.99353000 |
| H  | -4.77788400 | 1.37992800  | -0.41017700 |
| C  | -4.61228700 | -0.75244300 | -0.20438200 |
| C  | -3.23633800 | 3.29131100  | -0.65778900 |
| C  | -1.10812900 | 4.66595800  | -0.43751400 |
| H  | -0.16623800 | 3.60205800  | -2.08308200 |
| H  | 0.72339500  | 3.51809700  | -0.54703900 |
| C  | -5.92905500 | -0.84603400 | 0.30122000  |
| C  | -3.87298200 | -1.94286900 | -0.48824600 |
| C  | -2.54868400 | 4.63153900  | -0.96049500 |
| H  | -4.23491200 | 3.28864900  | -1.10949400 |
| H  | -3.35362900 | 3.14045700  | 0.42192700  |
| H  | -0.63297700 | 5.61835800  | -0.69574600 |
| H  | -1.11593900 | 4.60185700  | 0.65760700  |
| C  | -6.52206700 | -2.07006500 | 0.53928200  |
| H  | -6.47242600 | 0.07460300  | 0.50116200  |
| C  | -4.51829000 | -3.18609800 | -0.26920500 |

|   |             |             |             |
|---|-------------|-------------|-------------|
| O | -2.65119500 | -1.95201000 | -0.95566200 |
| H | -2.54327100 | 4.79996100  | -2.04652600 |
| H | -3.13155200 | 5.44770900  | -0.52066200 |
| C | -5.80196200 | -3.24355500 | 0.24087900  |
| H | -7.52853400 | -2.12888800 | 0.93904600  |
| H | -3.95787900 | -4.08524500 | -0.50092800 |
| H | -6.26115300 | -4.21266800 | 0.41566400  |
| H | -2.33027100 | 2.21753100  | -2.30341700 |
| H | -1.02040300 | 2.08257200  | 0.43309200  |
| O | -3.19044200 | 1.44259700  | 2.19466900  |
| H | -3.94813100 | 0.87933300  | 2.39235000  |
| H | -2.51952700 | 0.80419300  | 1.84611200  |
| C | 0.29548600  | -0.82574700 | 2.64708000  |
| C | -0.91999200 | -1.33865700 | 1.88157600  |
| O | -1.48304100 | -0.32955200 | 1.10946700  |
| H | 0.01709400  | 0.07762400  | 3.19526300  |
| H | -1.63738800 | -1.71015500 | 2.63518200  |
| H | -0.61310300 | -2.19927700 | 1.26978700  |
| C | 0.92732100  | -1.85689200 | 3.56467200  |
| H | 1.22061900  | -2.74446300 | 2.99436400  |
| H | 1.80538800  | -1.43994700 | 4.06111700  |
| H | 0.20954100  | -2.16453300 | 4.33160000  |
| O | 1.65568600  | 2.01571200  | 1.17342300  |
| O | 1.28123000  | -0.44934900 | 1.61200500  |
| S | 2.19828500  | 0.85452100  | 1.88765900  |
| O | 2.44087800  | 0.97728600  | 3.32692600  |
| C | 3.67043100  | 0.32541300  | 1.04107900  |
| C | 4.06960500  | -1.01075000 | 1.06888400  |
| C | 4.45320000  | 1.30082500  | 0.42570900  |
| C | 5.26536100  | -1.36669600 | 0.45631700  |
| H | 3.43876300  | -1.75613500 | 1.53623600  |
| C | 5.65439000  | 0.92586900  | -0.17171600 |
| H | 4.11741600  | 2.33155100  | 0.41078900  |
| C | 6.07492900  | -0.40889700 | -0.17011200 |
| H | 5.57244200  | -2.40851900 | 0.45486300  |
| H | 6.27006800  | 1.68020700  | -0.65327400 |
| C | 7.34765000  | -0.82305000 | -0.86268900 |
| H | 7.99342700  | 0.03535900  | -1.06425100 |
| H | 7.91240400  | -1.54348000 | -0.26316000 |
| H | 7.12584800  | -1.30518000 | -1.82272500 |

**subsequent hydrolysis**

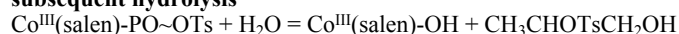

Charge: 0

Spin Multiplicity: 3

Sum of electronic and thermal Free Energies (a.u.): -2343.335991

Thermal correction to Gibbs Free Energy (a.u.): 0.540939

No imaginary frequency

Calculation of single point energy based on the optimized structure,  $E_p = -3582.4000431$  a.u.

|    |             |             |             |
|----|-------------|-------------|-------------|
| C  | -1.19525700 | 4.48641100  | -0.23110500 |
| C  | -2.27768500 | 3.58900100  | -0.31313300 |
| C  | 0.11026200  | 4.03208100  | -0.16382500 |
| H  | -1.38495000 | 5.55641100  | -0.21687300 |
| C  | -2.01789500 | 2.23222600  | -0.33680700 |
| H  | -3.29855800 | 3.95382300  | -0.35691900 |
| C  | 0.40411400  | 2.64487900  | -0.16135300 |
| H  | 0.94713600  | 4.71881200  | -0.09788800 |
| C  | -0.69655200 | 1.74023300  | -0.26340500 |
| H  | -2.83001800 | 1.51989800  | -0.40402200 |
| O  | 1.65602200  | 2.26784500  | -0.08037600 |
| C  | -0.48700800 | 0.32505200  | -0.36381400 |
| Co | 2.29161700  | 0.54134000  | 0.30295300  |
| N  | 0.64767600  | -0.26301800 | -0.19957800 |
| H  | -1.35522900 | -0.28179300 | -0.60069900 |
| N  | 3.05832600  | -0.84576400 | -0.84644200 |
| C  | 0.86042800  | -1.69713000 | -0.40364400 |
| C  | 4.32847800  | -0.99644700 | -1.06527900 |
| C  | 2.04751900  | -1.78106800 | -1.37821900 |
| C  | -0.33221800 | -2.51845900 | -0.87239300 |
| H  | 4.65332900  | -1.83252400 | -1.68819600 |



|   |             |             |             |
|---|-------------|-------------|-------------|
| C | 5.37159400  | -0.16781100 | -0.55543300 |
| C | 2.48828600  | -3.23467400 | -1.56233800 |
| C | 0.10287500  | -3.97780700 | -1.06348900 |
| H | -0.71257500 | -2.11949800 | -1.82393700 |
| H | -1.13397800 | -2.46101000 | -0.13521300 |
| C | 6.70436900  | -0.47447900 | -0.93396700 |
| C | 5.12057400  | 0.93362200  | 0.33172900  |
| C | 1.29725600  | -4.09464500 | -2.01901500 |
| H | 3.29594100  | -3.31069500 | -2.29800900 |
| H | 2.88096700  | -3.60732700 | -0.60735300 |
| H | -0.74230700 | -4.56697500 | -1.43255700 |
| H | 0.37340200  | -4.39785300 | -0.08637600 |
| C | 7.77365800  | 0.26224200  | -0.47784900 |
| H | 6.86621800  | -1.31621500 | -1.60330400 |
| C | 6.24813000  | 1.67224100  | 0.78896600  |
| O | 3.94599000  | 1.30234000  | 0.74905100  |
| H | 0.99068700  | -3.77315300 | -3.02393100 |
| H | 1.61486100  | -5.13884200 | -2.10920900 |
| C | 7.52791600  | 1.34624200  | 0.39349700  |
| H | 8.78609400  | 0.01630600  | -0.77842100 |
| H | 6.05422600  | 2.50434200  | 1.45695500  |
| H | 8.36300900  | 1.93620900  | 0.76139300  |
| H | 1.70799400  | -1.38087700 | -2.34588700 |
| H | 1.19108400  | -2.08884400 | 0.56453700  |
| O | 2.07099000  | -0.11208100 | 2.01802400  |
| H | 2.78668100  | 0.25156400  | 2.55701200  |
| H | 0.70873300  | -0.96328700 | 2.50464800  |
| C | -2.48691100 | -0.60714400 | 2.81799900  |
| C | -1.01544900 | -0.25461700 | 2.97279100  |
| O | -0.19711600 | -1.33957200 | 2.63375300  |
| H | -2.71239500 | -1.51838900 | 3.37761700  |
| H | -0.88591000 | 0.05269600  | 4.02617900  |
| H | -0.80412100 | 0.63035200  | 2.35462600  |
| C | -3.38880100 | 0.54774800  | 3.22835900  |
| H | -3.19894700 | 1.41569100  | 2.58897600  |
| H | -4.43969800 | 0.26636900  | 3.15618100  |
| H | -3.18136400 | 0.82977500  | 4.26495900  |
| O | -3.48842900 | -2.93439700 | 0.19661700  |
| O | -2.66895500 | -0.90283600 | 1.38687800  |
| S | -3.97214900 | -1.72477400 | 0.85821900  |
| O | -4.97355800 | -1.80363900 | 1.92073000  |
| C | -4.49070500 | -0.56854500 | -0.39274400 |
| C | -5.30800800 | 0.50395300  | -0.03705400 |
| C | -3.97273700 | -0.68836900 | -1.68211800 |
| C | -5.58040600 | 1.48573200  | -0.98569500 |
| H | -5.71396600 | 0.56582300  | 0.96593500  |
| C | -4.25224400 | 0.30644100  | -2.61591200 |
| H | -3.36134000 | -1.54662900 | -1.93690100 |
| C | -5.03974100 | 1.41539200  | -2.27796400 |
| H | -6.21200900 | 2.32743500  | -0.71672400 |
| H | -3.84358900 | 0.22815800  | -3.61909800 |
| C | -5.26113200 | 2.53174300  | -3.26486700 |
| H | -5.23585700 | 2.16843100  | -4.29568000 |
| H | -6.21905600 | 3.03178800  | -3.09821400 |
| H | -4.47158300 | 3.28615000  | -3.16162400 |

six-coordinated H<sub>2</sub>O-Co<sup>III</sup>-Cl counterion addition in the terminal carbon and subsequent hydrolysis

**H<sub>2</sub>O-Co<sup>III</sup>-Cl counterion addition in the terminal carbon**

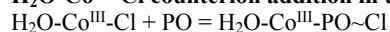

Charge: 0

Spin Multiplicity: 1

Sum of electronic and thermal Free Energies (a.u.): -1908.786572

Thermal correction to Gibbs Free Energy (a.u.): 0.423809

Imaginary frequencies: -356.02

Calculation of single point energy based on the optimized structure, Et = -3147.4833119 a.u.

|   |            |             |             |
|---|------------|-------------|-------------|
| C | 4.31582200 | -3.15752400 | -0.73479900 |
| C | 5.08187300 | -2.02485900 | -0.40826900 |
| C | 2.94594200 | -3.06637700 | -0.91639300 |
| H | 4.80148900 | -4.12400200 | -0.83858200 |

|    |             |             |             |
|----|-------------|-------------|-------------|
| C  | 4.44362700  | -0.80605900 | -0.27641000 |
| H  | 6.15210100  | -2.10791800 | -0.25482800 |
| C  | 2.27153000  | -1.82907300 | -0.78192500 |
| H  | 2.34745500  | -3.93887500 | -1.15700100 |
| C  | 3.05029100  | -0.67728900 | -0.46671600 |
| H  | 5.00837900  | 0.08240700  | -0.00777300 |
| O  | 0.96583600  | -1.81144000 | -0.95099800 |
| C  | 2.46566800  | 0.62573600  | -0.29519800 |
| Co | -0.18431900 | -0.32500800 | -0.70876700 |
| N  | 1.22341200  | 0.92773000  | -0.47263700 |
| H  | 3.15113100  | 1.41270100  | 0.00455300  |
| N  | -1.35703200 | 1.17875800  | -0.63891000 |
| C  | 0.69886800  | 2.23287400  | -0.04611400 |
| C  | -2.60273200 | 1.11659300  | -0.31446100 |
| C  | -0.61695800 | 2.43625600  | -0.80630300 |
| C  | 1.63970500  | 3.42493900  | -0.21459000 |
| H  | -3.14752100 | 2.04755900  | -0.15493400 |
| C  | -3.35942100 | -0.09414100 | -0.15547200 |
| C  | -1.32678400 | 3.71390000  | -0.36363800 |
| C  | 0.92878100  | 4.71779900  | 0.20976200  |
| H  | 1.96753300  | 3.49323600  | -1.26120300 |
| H  | 2.52366500  | 3.28413100  | 0.41222500  |
| C  | -4.67669800 | -0.00186900 | 0.34441100  |
| C  | -2.83177100 | -1.36520500 | -0.53989000 |
| C  | -0.39091300 | 4.91863300  | -0.54348500 |
| H  | -2.24596100 | 3.86487100  | -0.94102700 |
| H  | -1.61084600 | 3.62163900  | 0.69271800  |
| H  | 1.59151600  | 5.57441700  | 0.04815700  |
| H  | 0.72981000  | 4.67131600  | 1.28783200  |
| C  | -5.47484800 | -1.12132900 | 0.48517200  |
| H  | -5.05521900 | 0.97770700  | 0.62674800  |
| C  | -3.67615800 | -2.49401100 | -0.40527800 |
| O  | -1.62548400 | -1.53556600 | -1.02750400 |
| H  | -0.18529400 | 5.05806100  | -1.61349500 |
| H  | -0.89361300 | 5.82868500  | -0.19946200 |
| C  | -4.96027800 | -2.37216700 | 0.09809800  |
| H  | -6.48086500 | -1.03761300 | 0.88112600  |
| H  | -3.27249500 | -3.45698900 | -0.69957800 |
| H  | -5.57759200 | -3.26064600 | 0.19872000  |
| Cl | 2.10969200  | 1.04204700  | 2.72744200  |
| C  | -0.32521400 | -1.72993900 | 1.73993400  |
| C  | 0.96696300  | -1.36473900 | 2.33404000  |
| O  | -0.35915100 | -0.43348500 | 1.14154600  |
| H  | -0.25659000 | -2.52296500 | 0.98920000  |
| H  | 1.88336900  | -1.50398600 | 1.77919300  |
| H  | 1.05439700  | -1.07594100 | 3.37121900  |
| C  | -1.48873700 | -1.93591300 | 2.69018000  |
| H  | -2.42555400 | -1.99478900 | 2.13198100  |
| H  | -1.35880900 | -2.86852100 | 3.25127700  |
| H  | -1.55013200 | -1.10369600 | 3.39728300  |
| H  | -0.37872800 | 2.50959800  | -1.87734500 |
| H  | 0.48150000  | 2.10970100  | 1.02450200  |
| O  | -0.13733000 | -0.26663200 | -2.74958400 |
| H  | 0.54561300  | -0.95967300 | -2.82076800 |
| H  | -0.97385800 | -0.76582800 | -2.82331700 |

**H<sub>2</sub>O-Co<sup>III</sup>-Cl counterion addition in the terminal carbon**

H<sub>2</sub>O-Co<sup>III</sup>-Cl + PO = H<sub>2</sub>O-Co<sup>III</sup>-PO-Cl

Charge: 0

Spin Multiplicity: 1

Sum of electronic and thermal Free Energies (a.u.): -1908.818223

Thermal correction to Gibbs Free Energy (a.u.): 0.425097

No imaginary frequency

Calculation of single point energy based on the optimized structure, Er = -3147.5231599 a.u.

|   |            |             |             |
|---|------------|-------------|-------------|
| C | 3.97478900 | -3.57690100 | -0.63524000 |
| C | 4.83198300 | -2.52522700 | -0.27154000 |
| C | 2.62611600 | -3.35323100 | -0.86468900 |
| H | 4.36799500 | -4.58556700 | -0.72788400 |
| C | 4.31218200 | -1.24911700 | -0.15694600 |
| H | 5.88148900 | -2.71290600 | -0.07367600 |

|    |             |             |             |
|----|-------------|-------------|-------------|
| C  | 2.07501600  | -2.05854500 | -0.74392600 |
| H  | 1.95528300  | -4.16345400 | -1.13103500 |
| C  | 2.94712500  | -0.98708100 | -0.40288900 |
| H  | 4.94220200  | -0.42040100 | 0.15135600  |
| O  | 0.77399800  | -1.91681400 | -0.95380400 |
| C  | 2.49125100  | 0.37263200  | -0.26786200 |
| Co | -0.23126500 | -0.34123000 | -0.71056800 |
| N  | 1.27913400  | 0.78242800  | -0.48119900 |
| H  | 3.23899100  | 1.10249700  | 0.01876900  |
| N  | -1.26978000 | 1.25657300  | -0.59544100 |
| C  | 0.89243300  | 2.14799000  | -0.09292700 |
| C  | -2.50717200 | 1.29745000  | -0.23774200 |
| C  | -0.43150200 | 2.44563700  | -0.80147300 |
| C  | 1.92481100  | 3.24162000  | -0.36681000 |
| H  | -2.96406300 | 2.27044900  | -0.05486700 |
| C  | -3.36112000 | 0.15202700  | -0.07620400 |
| C  | -1.01386100 | 3.78476800  | -0.35632500 |
| C  | 1.35405700  | 4.60240400  | 0.05666300  |
| H  | 2.18851000  | 3.24466300  | -1.43364800 |
| H  | 2.82042800  | 3.03836700  | 0.22372100  |
| C  | -4.64901300 | 0.34339000  | 0.47017500  |
| C  | -2.96181800 | -1.14660400 | -0.51775100 |
| C  | 0.00960200  | 4.90172500  | -0.61654100 |
| H  | -1.94590200 | 3.99988000  | -0.89169800 |
| H  | -1.24888000 | 3.73926000  | 0.71507000  |
| H  | 2.07519700  | 5.39323700  | -0.17446400 |
| H  | 1.22881600  | 4.59928100  | 1.14654100  |
| C  | -5.53994600 | -0.70537000 | 0.59934200  |
| H  | -4.92996300 | 1.34211600  | 0.79554000  |
| C  | -3.90102000 | -2.19910100 | -0.39884900 |
| O  | -1.78459500 | -1.40796800 | -1.03983200 |
| H  | 0.15634600  | 5.00508400  | -1.70030200 |
| H  | -0.39370000 | 5.85635600  | -0.26243600 |
| C  | -5.15402400 | -1.98127000 | 0.14988100  |
| H  | -6.52206100 | -0.54683400 | 1.03058400  |
| H  | -3.59652700 | -3.18210600 | -0.74216900 |
| H  | -5.84725800 | -2.81325000 | 0.23693000  |
| Cl | 2.72675700  | 1.29487600  | 2.52212200  |
| C  | -0.63870800 | -1.85223700 | 1.80033700  |
| C  | 0.56660800  | -1.07497200 | 2.11193000  |
| O  | -0.44005200 | -0.52112600 | 1.18800500  |
| H  | -0.53354100 | -2.63645300 | 1.05544000  |
| H  | 1.51293300  | -1.32316700 | 1.65167000  |
| H  | 0.65318100  | -0.47367700 | 3.00976300  |
| C  | -1.81613100 | -1.92766500 | 2.72633000  |
| H  | -2.75046000 | -2.00382500 | 2.16508400  |
| H  | -1.71982600 | -2.81847100 | 3.35651400  |
| H  | -1.85593400 | -1.04788900 | 3.37326700  |
| H  | -0.23049000 | 2.48344000  | -1.88188200 |
| H  | 0.74129700  | 2.10594300  | 0.99698000  |
| O  | -0.17530600 | -0.25064500 | -2.69895100 |
| H  | 0.46277200  | -0.98384300 | -2.79985400 |
| H  | -1.04533600 | -0.68291800 | -2.81258300 |

**H<sub>2</sub>O-Co<sup>III</sup>-Cl counterion addition in the terminal carbon**

H<sub>2</sub>O-Co<sup>III</sup>-Cl + PO = H<sub>2</sub>O-Co<sup>III</sup>-PO~Cl

Charge: 0

Spin Multiplicity: 1

Sum of electronic and thermal Free Energies (a.u.): -1908.853941

Thermal correction to Gibbs Free Energy (a.u.): 0.425243

No imaginary frequency

Calculation of single point energy based on the optimized structure, Ep = -3147.5477466 a.u.

|   |            |             |             |
|---|------------|-------------|-------------|
| C | 4.59269800 | -2.78067100 | -0.93318400 |
| C | 5.27824800 | -1.55435800 | -0.82784700 |
| C | 3.21317700 | -2.83756500 | -0.87618800 |
| H | 5.15684900 | -3.70119500 | -1.05677900 |
| C | 4.54382100 | -0.39791900 | -0.66232200 |
| H | 6.36142300 | -1.52245800 | -0.86801900 |
| C | 2.43066600 | -1.66281400 | -0.71438700 |
| H | 2.68133500 | -3.78058900 | -0.94680500 |

|    |             |             |             |
|----|-------------|-------------|-------------|
| C  | 3.13035400  | -0.41722600 | -0.60940300 |
| H  | 5.04852900  | 0.56059100  | -0.56559800 |
| O  | 1.13032700  | -1.78611500 | -0.66362200 |
| C  | 2.44538100  | 0.82588100  | -0.39150800 |
| Co | -0.14334500 | -0.36858900 | -0.65020200 |
| N  | 1.16599100  | 0.98439600  | -0.37932400 |
| H  | 3.08115100  | 1.69112200  | -0.20310000 |
| N  | -1.39683300 | 1.06564600  | -0.80771000 |
| C  | 0.51897800  | 2.24650100  | -0.00670800 |
| C  | -2.65997700 | 0.93585500  | -0.58124400 |
| C  | -0.72004100 | 2.36187600  | -0.91643200 |
| C  | 1.38587000  | 3.50244500  | -0.06465300 |
| H  | -3.27620800 | 1.83349200  | -0.51685400 |
| C  | -3.34743500 | -0.31004800 | -0.39827700 |
| C  | -1.54912100 | 3.59910400  | -0.57404100 |
| C  | 0.54702600  | 4.74437900  | 0.26865700  |
| H  | 1.81999500  | 3.60391600  | -1.06896100 |
| H  | 2.21493900  | 3.42014900  | 0.64541000  |
| C  | -4.70636000 | -0.27213700 | -0.01638800 |
| C  | -2.70526300 | -1.56797200 | -0.62327900 |
| C  | -0.67661600 | 4.86020700  | -0.64689300 |
| H  | -2.39903300 | 3.69153500  | -1.25912300 |
| H  | -1.95553200 | 3.49096300  | 0.44000300  |
| H  | 1.16856600  | 5.64244400  | 0.18966400  |
| H  | 0.21403100  | 4.68183100  | 1.31276800  |
| C  | -5.43684600 | -1.43068500 | 0.16696800  |
| H  | -5.17224700 | 0.69782500  | 0.14261000  |
| C  | -3.47797800 | -2.73949200 | -0.43548400 |
| O  | -1.46536300 | -1.68650600 | -1.02953400 |
| H  | -0.34461900 | 5.01243500  | -1.68272000 |
| H  | -1.27330500 | 5.73769000  | -0.37661300 |
| C  | -4.80529000 | -2.66939700 | -0.04911700 |
| H  | -6.47694700 | -1.38744000 | 0.47119600  |
| H  | -2.98614500 | -3.69217600 | -0.60076500 |
| H  | -5.36644400 | -3.58911700 | 0.09300200  |
| Cl | 1.50308000  | 0.61533300  | 3.25839500  |
| C  | -0.09849300 | -1.31078400 | 1.99273100  |
| C  | 1.32146000  | -1.04422500 | 2.50940100  |
| O  | -0.55667700 | -0.31575800 | 1.13638100  |
| H  | -0.02194400 | -2.28266900 | 1.47494800  |
| H  | 2.04871700  | -1.07024600 | 1.70304200  |
| H  | 1.61077300  | -1.75773200 | 3.28352000  |
| C  | -1.11979200 | -1.44264000 | 3.12660400  |
| H  | -2.09333900 | -1.69971800 | 2.70213600  |
| H  | -0.82519300 | -2.22066300 | 3.83993400  |
| H  | -1.21215100 | -0.49272000 | 3.66034200  |
| H  | -0.35930100 | 2.44531300  | -1.95185300 |
| H  | 0.15965900  | 2.08629900  | 1.01815300  |
| O  | 0.07320800  | -0.45729000 | -2.73370100 |
| H  | 0.78743400  | -1.11639200 | -2.74099800 |
| H  | -0.73589100 | -1.00606300 | -2.76478000 |

**subsequent hydrolysis**

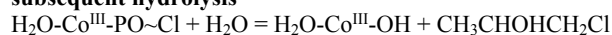

Charge: 0

Spin Multiplicity: 3

Sum of electronic and thermal Free Energies (a.u.): -1985.241361

Thermal correction to Gibbs Free Energy (a.u.): 0.438424

Imaginary frequencies: -570.97

Calculation of single point energy based on the optimized structure, Et = -3223.9907987 a.u.

|   |            |             |             |
|---|------------|-------------|-------------|
| C | 2.19498400 | -4.68321400 | -0.60410100 |
| C | 2.91301500 | -4.09414500 | -1.66326900 |
| C | 1.35000000 | -3.93510800 | 0.19422000  |
| H | 2.30356700 | -5.74664500 | -0.40972200 |
| C | 2.76591900 | -2.74127700 | -1.89342600 |
| H | 3.57243500 | -4.69246300 | -2.28201400 |
| C | 1.16905800 | -2.54475300 | -0.02298900 |
| H | 0.79921300 | -4.38502300 | 1.01301900  |
| C | 1.89908700 | -1.94750200 | -1.10657200 |
| H | 3.31622900 | -2.25937300 | -2.69767800 |

|    |             |             |             |
|----|-------------|-------------|-------------|
| O  | 0.38903000  | -1.88485100 | 0.79321900  |
| C  | 1.83424100  | -0.53648000 | -1.36927600 |
| Co | -0.47065200 | -0.28358800 | 0.30611800  |
| N  | 0.97618800  | 0.26293700  | -0.83756100 |
| H  | 2.58280400  | -0.12599900 | -2.04818700 |
| N  | -1.31410900 | 1.30528600  | -0.36738500 |
| C  | 1.00640100  | 1.72229700  | -0.93045700 |
| C  | -2.59403900 | 1.48940600  | -0.36533200 |
| C  | -0.43400000 | 2.17198300  | -1.17949100 |
| C  | 1.95752100  | 2.36825100  | -1.92958600 |
| H  | -2.97602900 | 2.43297400  | -0.76278500 |
| C  | -3.57363600 | 0.51795100  | 0.02007400  |
| C  | -0.54502300 | 3.67798700  | -0.93368600 |
| C  | 1.86382800  | 3.89536600  | -1.76001200 |
| H  | 1.69172500  | 2.07655500  | -2.95482500 |
| H  | 2.98422500  | 2.04201100  | -1.73983400 |
| C  | -4.91282400 | 0.92274900  | 0.20567200  |
| C  | -3.23851500 | -0.87175800 | 0.04938800  |
| C  | 0.42124100  | 4.41031600  | -1.88169700 |
| H  | -1.56703300 | 4.03384600  | -1.10096900 |
| H  | -0.29349600 | 3.88161000  | 0.11385200  |
| H  | 2.50166800  | 4.39282900  | -2.49803700 |
| H  | 2.26033500  | 4.15686400  | -0.77100100 |
| C  | -5.91121200 | -0.00054400 | 0.45019600  |
| H  | -5.14650500 | 1.98355400  | 0.16024500  |
| C  | -4.28404100 | -1.79824400 | 0.26765200  |
| O  | -2.02082000 | -1.32317300 | -0.15444000 |
| H  | 0.07397500  | 4.27223900  | -2.91461000 |
| H  | 0.38925100  | 5.48664300  | -1.68255700 |
| C  | -5.58365300 | -1.36925400 | 0.47362600  |
| H  | -6.93432100 | 0.32190200  | 0.60977000  |
| H  | -4.02599100 | -2.85171900 | 0.27853000  |
| H  | -6.36392400 | -2.10356000 | 0.65340300  |
| H  | -0.67854600 | 1.95868900  | -2.22991800 |
| H  | 1.27838600  | 2.03902500  | 0.08250800  |
| O  | -1.38941500 | -0.06060700 | 2.16643800  |
| H  | -1.27948200 | -0.92891900 | 2.57826000  |
| H  | -0.42544800 | 0.51156400  | 2.29567600  |
| O  | -0.93036400 | -1.60491600 | -2.71821700 |
| H  | -0.29970400 | -2.32243300 | -2.57927400 |
| H  | -1.46919000 | -1.61866200 | -1.90721100 |
| Cl | 3.80387400  | 1.38921400  | 1.11703800  |
| C  | 1.70984800  | 0.34936800  | 2.68672300  |
| C  | 2.97167600  | -0.03177500 | 1.91585300  |
| O  | 0.72146500  | 0.91732300  | 1.87812200  |
| H  | 1.37065500  | -0.62995000 | 3.08475200  |
| H  | 2.74206000  | -0.72601100 | 1.11353700  |
| H  | 3.71716900  | -0.47162900 | 2.58032100  |
| C  | 2.00519300  | 1.27221900  | 3.87265800  |
| H  | 1.08662200  | 1.44676000  | 4.43958000  |
| H  | 2.75381200  | 0.83874500  | 4.54581200  |
| H  | 2.37313500  | 2.23601100  | 3.51114900  |

**subsequent hydrolysis**

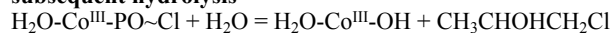

Charge: 0

Spin Multiplicity: 3

Sum of electronic and thermal Free Energies (a.u.): -1985.272580

Thermal correction to Gibbs Free Energy (a.u.): 0.441331

No imaginary frequency

Calculation of single point energy based on the optimized structure, Er = -3224.0227652 a.u.

|   |             |            |             |
|---|-------------|------------|-------------|
| C | -4.84939100 | 2.36793200 | -1.05040300 |
| C | -5.45232800 | 1.17783000 | -0.59682800 |
| C | -3.48340400 | 2.44995500 | -1.24192100 |
| H | -5.46694500 | 3.23918700 | -1.25051200 |
| C | -4.65316200 | 0.08211300 | -0.34533900 |
| H | -6.52510100 | 1.12644200 | -0.44733600 |
| C | -2.63652600 | 1.34140900 | -0.98059700 |
| H | -3.01250000 | 3.36420100 | -1.58707500 |
| C | -3.25014000 | 0.13156400 | -0.52654000 |

|    |             |             |             |
|----|-------------|-------------|-------------|
| H  | -5.09483400 | -0.84749900 | 0.00526700  |
| O  | -1.35180700 | 1.48315700  | -1.17859600 |
| C  | -2.49312000 | -1.05207200 | -0.24773300 |
| Co | 0.01071500  | 0.22164400  | -0.79495500 |
| N  | -1.21089200 | -1.18230600 | -0.34441300 |
| H  | -3.07355200 | -1.91118200 | 0.08951600  |
| N  | 1.34813400  | -1.15503300 | -0.74900600 |
| C  | -0.50511800 | -2.39400400 | 0.10894700  |
| C  | 2.59561100  | -0.90942900 | -0.53354600 |
| C  | 0.76261300  | -2.50008100 | -0.75277300 |
| C  | -1.29896700 | -3.69966200 | 0.08659300  |
| H  | 3.26755000  | -1.74088100 | -0.32500500 |
| C  | 3.18383400  | 0.39971200  | -0.55757600 |
| C  | 1.66070300  | -3.63275300 | -0.25892100 |
| C  | -0.40465500 | -4.85885500 | 0.55430000  |
| H  | -1.66821900 | -3.88862800 | -0.93074600 |
| H  | -2.17198100 | -3.63418900 | 0.74407000  |
| C  | 4.52137100  | 0.54618700  | -0.13060000 |
| C  | 2.47576100  | 1.52820200  | -1.07535200 |
| C  | 0.88124100  | -4.95591800 | -0.27411600 |
| H  | 2.55033800  | -3.72067000 | -0.89251100 |
| H  | 1.98700400  | -3.39283500 | 0.75998100  |
| H  | -0.96351300 | -5.79927300 | 0.50242500  |
| H  | -0.14277500 | -4.70147600 | 1.60816200  |
| C  | 5.16384600  | 1.76829700  | -0.18677700 |
| H  | 5.03729300  | -0.32672200 | 0.26090100  |
| C  | 3.16583500  | 2.76051600  | -1.15314300 |
| O  | 1.23220500  | 1.47764600  | -1.49898400 |
| H  | 0.62838800  | -5.21751800 | -1.31064000 |
| H  | 1.51611400  | -5.76253500 | 0.10719100  |
| C  | 4.47251300  | 2.87604200  | -0.71058600 |
| H  | 6.18537600  | 1.87193000  | 0.16218500  |
| H  | 2.62446500  | 3.61205300  | -1.55085700 |
| H  | 4.96794000  | 3.84152000  | -0.76403700 |
| H  | 0.45079400  | -2.69356500 | -1.78911300 |
| H  | -0.16135600 | -2.18062300 | 1.13028200  |
| O  | 1.47605300  | -1.40638600 | 2.41419500  |
| H  | 1.02516600  | -1.36417000 | 3.26660800  |
| H  | 1.12169300  | -0.60912300 | 1.94251200  |
| O  | -0.22171700 | -0.09097500 | -3.24748700 |
| H  | -0.95155400 | 0.54195300  | -3.16323500 |
| H  | 0.55881000  | 0.48730100  | -3.21044300 |
| Cl | -1.19872500 | 0.70882200  | 3.70911300  |
| C  | 0.20815700  | 1.88252700  | 1.59275900  |
| C  | -1.11270600 | 1.94646000  | 2.36468200  |
| O  | 0.37687800  | 0.61081700  | 1.05057900  |
| H  | 0.08689100  | 2.63173600  | 0.78985100  |
| H  | -1.94821600 | 1.71444000  | 1.70538300  |
| H  | -1.26687900 | 2.91829200  | 2.83762400  |
| C  | 1.42654600  | 2.26360900  | 2.43702700  |
| H  | 2.31506400  | 2.28363800  | 1.80139100  |
| H  | 1.30295300  | 3.24995200  | 2.89805000  |
| H  | 1.58594000  | 1.52369000  | 3.22591100  |

**subsequent hydrolysis**

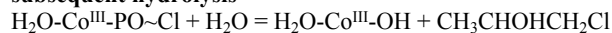

Charge: 0

Spin Multiplicity: 3

Sum of electronic and thermal Free Energies (a.u.): -1985.269707

Thermal correction to Gibbs Free Energy (a.u.): 0.442583

No imaginary frequency

Calculation of single point energy based on the optimized structure,  $E_p = -3224.0197965$  a.u.

|   |             |            |            |
|---|-------------|------------|------------|
| C | -4.21716400 | 3.81055700 | 0.64129000 |
| C | -5.00656300 | 2.65172300 | 0.52024600 |
| C | -2.85459900 | 3.77660000 | 0.40319000 |
| H | -4.68269000 | 4.74922300 | 0.92901800 |
| C | -4.39923700 | 1.46845000 | 0.14809900 |
| H | -6.07350300 | 2.68964100 | 0.71073700 |
| C | -2.20486300 | 2.57054200 | 0.04599900 |
| H | -2.24029100 | 4.66561200 | 0.49755000 |

|    |             |             |             |
|----|-------------|-------------|-------------|
| C  | -3.00813400 | 1.39818500  | -0.09080000 |
| H  | -4.98851800 | 0.56165500  | 0.03675800  |
| O  | -0.90877300 | 2.59572400  | -0.16130700 |
| C  | -2.46060500 | 0.15062600  | -0.53828300 |
| Co | 0.21804300  | 1.07553300  | -0.28831800 |
| N  | -1.21183400 | -0.10061400 | -0.74744900 |
| H  | -3.18133900 | -0.64452200 | -0.72324200 |
| N  | 1.34784100  | -0.26452900 | -1.10666800 |
| C  | -0.73549600 | -1.43213100 | -1.16425200 |
| C  | 2.60540300  | -0.39582700 | -0.84728400 |
| C  | 0.57726800  | -1.20710100 | -1.92585700 |
| C  | -1.70837400 | -2.27923000 | -1.98155400 |
| H  | 3.13098300  | -1.27286700 | -1.22524200 |
| C  | 3.39346700  | 0.54063000  | -0.10010100 |
| C  | 1.24845500  | -2.54293000 | -2.24056000 |
| C  | -1.04778300 | -3.62186100 | -2.32896400 |
| H  | -1.99141900 | -1.74010100 | -2.89597500 |
| H  | -2.62113000 | -2.47067100 | -1.41127300 |
| C  | 4.72914300  | 0.19654000  | 0.20968900  |
| C  | 2.88990400  | 1.83060800  | 0.26117200  |
| C  | 0.29035800  | -3.42866200 | -3.05141500 |
| H  | 2.17381800  | -2.38703000 | -2.80617400 |
| H  | 1.50894900  | -3.03365900 | -1.29444100 |
| H  | -1.72782200 | -4.22086500 | -2.94385200 |
| H  | -0.88322500 | -4.18110600 | -1.39936200 |
| C  | 5.56580600  | 1.07594200  | 0.86712600  |
| H  | 5.08778900  | -0.78846700 | -0.07862600 |
| C  | 3.77603100  | 2.72125500  | 0.91658100  |
| O  | 1.67458600  | 2.24725000  | -0.00681300 |
| H  | 0.11221000  | -2.96354200 | -4.03036200 |
| H  | 0.76064500  | -4.39839400 | -3.24573900 |
| C  | 5.07460900  | 2.34928300  | 1.21346600  |
| H  | 6.58477500  | 0.79442100  | 1.10886500  |
| H  | 3.39205300  | 3.70075300  | 1.18076500  |
| H  | 5.72404300  | 3.05316800  | 1.72664900  |
| H  | 0.34791600  | -0.67429900 | -2.85933800 |
| H  | -0.47570500 | -1.96291600 | -0.24156800 |
| O  | 0.24835300  | 0.40049800  | 1.50342900  |
| H  | 0.73075800  | 1.04569800  | 2.03799700  |
| H  | 0.76194900  | -1.14230000 | 1.48084400  |
| O  | 0.40806900  | 2.24439300  | -2.55406400 |
| H  | -0.26794700 | 2.77184100  | -2.09622000 |
| H  | 1.22363800  | 2.54834500  | -2.12557200 |
| Cl | -2.33333600 | -2.85097900 | 1.58585300  |
| C  | 0.28815700  | -2.65425300 | 2.61737500  |
| C  | -1.15022200 | -2.16128400 | 2.80355200  |
| O  | 0.88946600  | -2.13425200 | 1.45382600  |
| H  | 0.80340500  | -2.26729800 | 3.51856600  |
| H  | -1.18887400 | -1.07992200 | 2.66953700  |
| H  | -1.54171100 | -2.44830600 | 3.78081000  |
| C  | 0.42941200  | -4.16942000 | 2.59785700  |
| H  | 1.48724800  | -4.43732400 | 2.53672000  |
| H  | 0.00258400  | -4.61914900 | 3.49977900  |
| H  | -0.08453600 | -4.58271500 | 1.72628900  |

six-coordinated H<sub>2</sub>O-Co<sup>III</sup>-Cl counterion addition in the middle carbon and subsequent hydrolysis

**H<sub>2</sub>O-Co<sup>III</sup>-Cl counterion addition in the middle carbon**

H<sub>2</sub>O-Co<sup>III</sup>-Cl + PO = H<sub>2</sub>O-Co<sup>III</sup>-PO~Cl

Charge: 0

Spin Multiplicity: 1

Sum of electronic and thermal Free Energies (a.u.): -1908.787046

Thermal correction to Gibbs Free Energy (a.u.): 0.422668

Imaginary frequencies: -237.07

Calculation of single point energy based on the optimized structure, Et = -3147.4853475 a.u.

|   |            |             |             |
|---|------------|-------------|-------------|
| C | 4.45531600 | -2.73935100 | -0.98577300 |
| C | 5.11791200 | -1.53987800 | -0.67328500 |
| C | 3.07614000 | -2.78307600 | -1.10740000 |
| H | 5.02942400 | -3.65129900 | -1.12547800 |
| C | 4.36713400 | -0.39221600 | -0.49722500 |

|    |             |             |             |
|----|-------------|-------------|-------------|
| H  | 6.19677800  | -1.51662000 | -0.56662000 |
| C  | 2.28684300  | -1.62220800 | -0.91931800 |
| H  | 2.55713100  | -3.70917400 | -1.33187200 |
| C  | 2.96132600  | -0.40121100 | -0.62436700 |
| H  | 4.85171900  | 0.54549600  | -0.23970900 |
| O  | 0.97954900  | -1.74118500 | -1.00874000 |
| C  | 2.25991100  | 0.83678400  | -0.40977200 |
| Co | -0.29783000 | -0.37192100 | -0.71436700 |
| N  | 0.98964900  | 1.01575500  | -0.54238400 |
| H  | 2.87506800  | 1.68373100  | -0.12133400 |
| N  | -1.60646400 | 1.01415200  | -0.60347500 |
| C  | 0.35762700  | 2.26781800  | -0.10289300 |
| C  | -2.81515200 | 0.83676900  | -0.19411800 |
| C  | -0.99895200 | 2.33343200  | -0.81601400 |
| C  | 1.17244800  | 3.54271400  | -0.31572800 |
| H  | -3.43987000 | 1.71222300  | -0.01410300 |
| C  | -3.43062400 | -0.43982000 | 0.04315200  |
| C  | -1.81177800 | 3.54391800  | -0.36250100 |
| C  | 0.35416300  | 4.76750800  | 0.11718800  |
| H  | 1.45882500  | 3.62721200  | -1.37331200 |
| H  | 2.08383700  | 3.49515200  | 0.28515900  |
| C  | -4.71326000 | -0.46722600 | 0.63231300  |
| C  | -2.80200900 | -1.66132000 | -0.35122600 |
| C  | -1.00312600 | 4.82931200  | -0.59226000 |
| H  | -2.76241200 | 3.59556000  | -0.90556700 |
| H  | -2.04564400 | 3.44282600  | 0.70529600  |
| H  | 0.92557600  | 5.68121200  | -0.07733400 |
| H  | 0.19706000  | 4.71817300  | 1.20200100  |
| C  | -5.37837000 | -1.65798000 | 0.85683100  |
| H  | -5.17256200 | 0.47688800  | 0.91585700  |
| C  | -3.50817100 | -2.86634500 | -0.11988100 |
| O  | -1.62946000 | -1.71895500 | -0.93887600 |
| H  | -0.84803000 | 4.96949200  | -1.67068500 |
| H  | -1.57900500 | 5.69297700  | -0.24321500 |
| C  | -4.76095500 | -2.86110600 | 0.46987400  |
| H  | -6.35930200 | -1.66529200 | 1.31916500  |
| H  | -3.02831500 | -3.79160900 | -0.42100200 |
| H  | -5.27272400 | -3.80483300 | 0.63789500  |
| Cl | 2.01928700  | 1.37614900  | 2.65575700  |
| C  | 0.83748500  | -1.21102600 | 2.62691800  |
| C  | -0.25495500 | -1.71784100 | 1.76752100  |
| O  | -0.38229100 | -0.45930800 | 1.13846800  |
| H  | 0.57742700  | -0.53116500 | 3.42792600  |
| H  | -1.17316100 | -2.01598800 | 2.29260800  |
| H  | 0.06015500  | -2.51259200 | 1.08419700  |
| C  | 2.20532800  | -1.74085500 | 2.54285700  |
| H  | 2.90758300  | -1.16681400 | 3.14170200  |
| H  | 2.14418000  | -2.79282900 | 2.87879200  |
| H  | 2.55909800  | -1.78883200 | 1.51019900  |
| H  | -0.80742800 | 2.41256100  | -1.89587000 |
| H  | 0.19484900  | 2.13576700  | 0.97632000  |
| O  | -0.36267100 | -0.33864600 | -2.75451100 |
| H  | -1.15728000 | -0.90643500 | -2.77756400 |
| H  | 0.37152200  | -0.97381800 | -2.85247600 |

**H<sub>2</sub>O-Co<sup>III</sup>-Cl counterion addition in the middle carbon**

H<sub>2</sub>O-Co<sup>III</sup>-Cl + PO = H<sub>2</sub>O-Co<sup>III</sup>-PO~Cl

Charge: 0

Spin Multiplicity: 1

Sum of electronic and thermal Free Energies (a.u.): -1908.810782

Thermal correction to Gibbs Free Energy (a.u.): 0.425377

No imaginary frequency

Calculation of single point energy based on the optimized structure, Er = -3147.5165932 a.u.

|   |            |             |             |
|---|------------|-------------|-------------|
| C | 4.26804000 | -3.15042500 | -0.85323800 |
| C | 5.02175900 | -2.00460000 | -0.54983600 |
| C | 2.88842900 | -3.08817600 | -0.97279500 |
| H | 4.76867900 | -4.10581800 | -0.98454800 |
| C | 4.36500100 | -0.79875000 | -0.38631600 |
| H | 6.09877900 | -2.06600600 | -0.43978200 |
| C | 2.19949200 | -1.86884500 | -0.79136000 |



|    |             |             |             |
|----|-------------|-------------|-------------|
| H  | 2.29854900  | -3.97406000 | -1.18399900 |
| C  | 2.96328200  | -0.70191300 | -0.51801100 |
| H  | 4.91707900  | 0.10080500  | -0.13098800 |
| O  | 0.87735800  | -1.88968500 | -0.86786400 |
| C  | 2.36128300  | 0.59334100  | -0.35198200 |
| Co | -0.28217900 | -0.42145600 | -0.63841700 |
| N  | 1.10531700  | 0.86531500  | -0.52329700 |
| H  | 3.03309000  | 1.40552800  | -0.10056200 |
| N  | -1.48358700 | 1.07226400  | -0.60059500 |
| C  | 0.58350300  | 2.18882700  | -0.15153700 |
| C  | -2.72453300 | 1.01237600  | -0.25865900 |
| C  | -0.76718200 | 2.33049100  | -0.85893400 |
| C  | 1.49838600  | 3.37557100  | -0.45382700 |
| H  | -3.27704300 | 1.94525900  | -0.14305200 |
| C  | -3.46638800 | -0.19621500 | -0.02207400 |
| C  | -1.47906100 | 3.61998200  | -0.45663600 |
| C  | 0.79230200  | 4.68263100  | -0.06855200 |
| H  | 1.76396700  | 3.37788900  | -1.52020200 |
| H  | 2.40849400  | 3.27881400  | 0.14176100  |
| C  | -4.78066500 | -0.08887700 | 0.48494200  |
| C  | -2.92772800 | -1.48165400 | -0.33655500 |
| C  | -0.57213000 | 4.82503200  | -0.75228200 |
| H  | -2.42671800 | 3.72589300  | -0.99723800 |
| H  | -1.71085500 | 3.58500200  | 0.61594500  |
| H  | 1.43118600  | 5.53538000  | -0.32061700 |
| H  | 0.66225200  | 4.69817400  | 1.02072800  |
| C  | -5.56288800 | -1.20742200 | 0.70028800  |
| H  | -5.16924900 | 0.90154300  | 0.70963900  |
| C  | -3.75399900 | -2.61056300 | -0.12008000 |
| O  | -1.72175500 | -1.66788200 | -0.82425400 |
| H  | -0.43186200 | 4.90827400  | -1.83861400 |
| H  | -1.07087600 | 5.74498400  | -0.42926200 |
| C  | -5.03511400 | -2.47332200 | 0.38678500  |
| H  | -6.56702500 | -1.11203600 | 1.09817300  |
| H  | -3.34216700 | -3.58466600 | -0.36192000 |
| H  | -5.63999700 | -3.36135600 | 0.54750900  |
| Cl | 2.53630500  | 1.53654700  | 2.45544600  |
| C  | 0.33637000  | -0.92133100 | 2.47701200  |
| C  | -1.04682900 | -1.33024900 | 2.17768700  |
| O  | -0.38558400 | -0.38925000 | 1.29306600  |
| H  | 0.52206100  | -0.09120200 | 3.15313200  |
| H  | -1.89759800 | -0.89631800 | 2.69553500  |
| H  | -1.20891800 | -2.30818300 | 1.73327300  |
| C  | 1.48698600  | -1.85860100 | 2.30219200  |
| H  | 2.38421200  | -1.28682200 | 2.06294300  |
| H  | 1.65173400  | -2.35298300 | 3.26676100  |
| H  | 1.28777200  | -2.61643900 | 1.54446700  |
| H  | -0.57529600 | 2.34857300  | -1.94157000 |
| H  | 0.44064400  | 2.15064200  | 0.93854900  |
| O  | -0.31235000 | -0.45657000 | -2.62173200 |
| H  | -1.13996700 | -0.97499700 | -2.67519200 |
| H  | 0.38735500  | -1.13768000 | -2.69008400 |

**H<sub>2</sub>O-Co<sup>III</sup>-Cl counterion addition in the middle carbon**

H<sub>2</sub>O-Co<sup>III</sup>-Cl + PO = H<sub>2</sub>O-Co<sup>III</sup>-PO-Cl

Charge: 0

Spin Multiplicity: 1

Sum of electronic and thermal Free Energies (a.u.): -1908.850972

Thermal correction to Gibbs Free Energy (a.u.): 0.424394

No imaginary frequency

Calculation of single point energy based on the optimized structure, Ep = -3147.5461455 a.u.

|   |            |             |             |
|---|------------|-------------|-------------|
| C | 4.61073700 | -2.69730500 | -1.08124500 |
| C | 5.25841100 | -1.45777000 | -0.91071000 |
| C | 3.23201100 | -2.79014900 | -1.08701700 |
| H | 5.20396600 | -3.59940100 | -1.20495700 |
| C | 4.48717300 | -0.32514900 | -0.74789800 |
| H | 6.34115400 | -1.39741100 | -0.90235900 |
| C | 2.41347900 | -1.64093200 | -0.92645400 |
| H | 2.72848100 | -3.74347800 | -1.20817000 |
| C | 3.07371400 | -0.38226200 | -0.75558300 |

|    |             |             |             |
|----|-------------|-------------|-------------|
| H  | 4.96192300  | 0.64311400  | -0.60633300 |
| O  | 1.11592300  | -1.79549800 | -0.94686800 |
| C  | 2.35067200  | 0.84193000  | -0.55788100 |
| Co | -0.20287500 | -0.43228600 | -0.75556100 |
| N  | 1.06744700  | 0.97556900  | -0.57563200 |
| H  | 2.96246300  | 1.72337700  | -0.36383300 |
| N  | -1.52654300 | 0.93955100  | -0.77584100 |
| C  | 0.39950500  | 2.23154900  | -0.20513100 |
| C  | -2.75637100 | 0.76109200  | -0.42933900 |
| C  | -0.92179500 | 2.25615600  | -0.99344400 |
| C  | 1.20223300  | 3.51534400  | -0.41242300 |
| H  | -3.39910400 | 1.63416000  | -0.30908900 |
| C  | -3.37315800 | -0.51189300 | -0.19428700 |
| C  | -1.76927500 | 3.47188700  | -0.62174200 |
| C  | 0.34824000  | 4.74106400  | -0.05685500 |
| H  | 1.53230600  | 3.57547200  | -1.45854700 |
| H  | 2.09965500  | 3.50862600  | 0.21406100  |
| C  | -4.69416300 | -0.53514300 | 0.30514900  |
| C  | -2.70644900 | -1.73846000 | -0.50826200 |
| C  | -0.96729200 | 4.76199400  | -0.84297900 |
| H  | -2.68768900 | 3.49433000  | -1.21860300 |
| H  | -2.06491700 | 3.39775400  | 0.43291400  |
| H  | 0.91921800  | 5.65635700  | -0.24506700 |
| H  | 0.12735000  | 4.72211800  | 1.01825600  |
| C  | -5.36380200 | -1.72467600 | 0.51684000  |
| H  | -5.17955200 | 0.41237300  | 0.52858000  |
| C  | -3.42017800 | -2.94313000 | -0.29137400 |
| O  | -1.50578000 | -1.79915000 | -1.02431400 |
| H  | -0.75115400 | 4.87483100  | -1.91386800 |
| H  | -1.57142500 | 5.62763200  | -0.55176300 |
| C  | -4.70991900 | -2.93287600 | 0.20889400  |
| H  | -6.37468300 | -1.72927900 | 0.90983000  |
| H  | -2.91197900 | -3.87183800 | -0.52820600 |
| H  | -5.22488000 | -3.87638400 | 0.36941800  |
| Cl | 1.14581500  | 1.19227400  | 3.24830700  |
| C  | 0.53292000  | -0.55481000 | 3.25724800  |
| C  | 0.54343300  | -1.09981800 | 1.83186700  |
| O  | -0.39862900 | -0.42851200 | 1.06824600  |
| H  | -0.49695300 | -0.46475000 | 3.60718400  |
| H  | 0.33033900  | -2.18348300 | 1.90134400  |
| H  | 1.57137700  | -1.00283400 | 1.45356700  |
| C  | 1.38813300  | -1.36571700 | 4.21606600  |
| H  | 1.39043000  | -0.92674100 | 5.21603500  |
| H  | 0.98817200  | -2.38338400 | 4.28416500  |
| H  | 2.42084600  | -1.42434400 | 3.85992400  |
| H  | -0.66693100 | 2.30961300  | -2.06189400 |
| H  | 0.14449400  | 2.11962000  | 0.85612400  |
| O  | -0.17534300 | -0.49843700 | -2.84940100 |
| H  | -0.97122400 | -1.06533600 | -2.82982800 |
| H  | 0.55182600  | -1.14627200 | -2.87157000 |

**H<sub>2</sub>O-Co<sup>III</sup>-Cl counterion addition in the middle carbon**

H<sub>2</sub>O-Co<sup>III</sup>-Cl + PO = H<sub>2</sub>O-Co<sup>III</sup>-PO~Cl

Charge: 0

Spin Multiplicity: 3

Sum of electronic and thermal Free Energies (a.u.): -1908.778588

Thermal correction to Gibbs Free Energy (a.u.): 0.416606

Imaginary frequencies: -295.27

Calculation of single point energy based on the optimized structure, Et = -3147.4736933 a.u.

|   |            |             |             |
|---|------------|-------------|-------------|
| C | 4.40372600 | -2.74754300 | -1.15903900 |
| C | 5.08332500 | -1.55719400 | -0.84169600 |
| C | 3.02230400 | -2.78210200 | -1.23964600 |
| H | 4.96878900 | -3.65877700 | -1.33479300 |
| C | 4.34923800 | -0.40752800 | -0.62204800 |
| H | 6.16518700 | -1.54383700 | -0.76874400 |
| C | 2.24853200 | -1.62134300 | -0.99402300 |
| H | 2.49014900 | -3.69958400 | -1.46758500 |
| C | 2.93922500 | -0.40838200 | -0.70225800 |
| H | 4.84807800 | 0.52265600  | -0.36550700 |
| O | 0.93994800 | -1.72736500 | -1.03229100 |

|    |             |             |             |
|----|-------------|-------------|-------------|
| C  | 2.24834500  | 0.82793200  | -0.47357400 |
| Co | -0.31320100 | -0.39090300 | -0.59529600 |
| N  | 0.96913700  | 1.00599300  | -0.54906900 |
| H  | 2.87392100  | 1.68326800  | -0.23908100 |
| N  | -1.62098800 | 1.01686500  | -0.53619700 |
| C  | 0.35749000  | 2.27149700  | -0.11197200 |
| C  | -2.84838000 | 0.85204900  | -0.17502100 |
| C  | -1.01333200 | 2.33001300  | -0.79320300 |
| C  | 1.17483000  | 3.53681200  | -0.36662600 |
| H  | -3.47751200 | 1.73323300  | -0.04533600 |
| C  | -3.47950900 | -0.41372500 | 0.06350000  |
| C  | -1.81176200 | 3.55291900  | -0.34700300 |
| C  | 0.37196500  | 4.77237000  | 0.06572000  |
| H  | 1.43361800  | 3.60230400  | -1.43248900 |
| H  | 2.10130300  | 3.49454700  | 0.21124800  |
| C  | -4.79672600 | -0.42177700 | 0.57575300  |
| C  | -2.83993700 | -1.64840000 | -0.26831600 |
| C  | -1.00033500 | 4.82970000  | -0.61420200 |
| H  | -2.77021600 | 3.60286700  | -0.87580000 |
| H  | -2.02913000 | 3.46995800  | 0.72594600  |
| H  | 0.94333000  | 5.67975300  | -0.15623500 |
| H  | 0.23893100  | 4.74149000  | 1.15449000  |
| C  | -5.48243900 | -1.60260300 | 0.78056400  |
| H  | -5.26432800 | 0.53045500  | 0.81409300  |
| C  | -3.57200200 | -2.84411500 | -0.06711200 |
| O  | -1.63167000 | -1.73505300 | -0.77375900 |
| H  | -0.86812100 | 4.95148600  | -1.69776300 |
| H  | -1.56383000 | 5.70207900  | -0.26672800 |
| C  | -4.85506700 | -2.81850200 | 0.44888800  |
| H  | -6.48850100 | -1.59475900 | 1.18525800  |
| H  | -3.08306300 | -3.77731600 | -0.32533000 |
| H  | -5.38502300 | -3.75456900 | 0.60180600  |
| Cl | 2.20638300  | 1.35154800  | 2.55143200  |
| C  | 1.04209400  | -1.15472700 | 2.80394400  |
| C  | -0.13386200 | -1.64804900 | 2.05322400  |
| O  | -0.30194800 | -0.43597000 | 1.36963000  |
| H  | 0.86794600  | -0.49065300 | 3.63948900  |
| H  | -0.99479400 | -1.90522700 | 2.68997200  |
| H  | 0.09618300  | -2.49652700 | 1.39397200  |
| C  | 2.38100200  | -1.72864300 | 2.58769700  |
| H  | 3.16442500  | -1.17009900 | 3.09316300  |
| H  | 2.32725700  | -2.76955400 | 2.95785700  |
| H  | 2.61585000  | -1.80702300 | 1.52359200  |
| H  | -0.84809600 | 2.38018000  | -1.87882300 |
| H  | 0.22063200  | 2.15405600  | 0.97204100  |
| O  | -0.59089000 | -0.47991200 | -3.01963600 |
| H  | -1.31131600 | -1.08349400 | -2.77349100 |
| H  | 0.18333100  | -1.06439400 | -3.01257200 |

**H<sub>2</sub>O-Co<sup>III</sup>-Cl counterion addition in the middle carbon**

H<sub>2</sub>O-Co<sup>III</sup>-Cl + PO = H<sub>2</sub>O-Co<sup>III</sup>-PO-Cl

Charge: 0

Spin Multiplicity: 3

Sum of electronic and thermal Free Energies (a.u.): -1908.818206

Thermal correction to Gibbs Free Energy (a.u.): 0.418383

No imaginary frequency

Calculation of single point energy based on the optimized structure, Er = -3147.5181825 a.u.

|    |             |             |             |
|----|-------------|-------------|-------------|
| C  | 4.20489200  | -3.21739300 | -0.90259000 |
| C  | 4.98710900  | -2.08138700 | -0.62056900 |
| C  | 2.82716700  | -3.13041000 | -0.99362900 |
| H  | 4.68681300  | -4.18153100 | -1.03834700 |
| C  | 4.36355500  | -0.86094200 | -0.44807100 |
| H  | 6.06462800  | -2.16610600 | -0.53226400 |
| C  | 2.16829400  | -1.89296900 | -0.80115300 |
| H  | 2.21350300  | -4.00376500 | -1.18700300 |
| C  | 2.96093600  | -0.73761600 | -0.55089500 |
| H  | 4.93842800  | 0.02662900  | -0.20300100 |
| O  | 0.85307200  | -1.87866100 | -0.84745800 |
| C  | 2.37769000  | 0.55938300  | -0.38381600 |
| Co | -0.28402900 | -0.42184400 | -0.62456900 |

|    |             |             |             |
|----|-------------|-------------|-------------|
| N  | 1.10725600  | 0.83382100  | -0.51665800 |
| H  | 3.06266400  | 1.37558300  | -0.19641600 |
| N  | -1.46262000 | 1.08481000  | -0.59434100 |
| C  | 0.61564200  | 2.17539000  | -0.15176600 |
| C  | -2.71426400 | 1.04272700  | -0.27925100 |
| C  | -0.73345100 | 2.33620900  | -0.85575500 |
| C  | 1.54985000  | 3.34435700  | -0.46286900 |
| H  | -3.25737400 | 1.98322400  | -0.18552000 |
| C  | -3.47569600 | -0.15002800 | -0.04817700 |
| C  | -1.42590100 | 3.63570600  | -0.45231700 |
| C  | 0.86504200  | 4.66309700  | -0.07653800 |
| H  | 1.80676300  | 3.34096700  | -1.53133000 |
| H  | 2.46220000  | 3.23506700  | 0.12723000  |
| C  | -4.81564200 | -0.02073800 | 0.38437800  |
| C  | -2.93272800 | -1.44949700 | -0.29301900 |
| C  | -0.50101200 | 4.82637700  | -0.75220100 |
| H  | -2.37228000 | 3.75658800  | -0.99166700 |
| H  | -1.65657000 | 3.60405300  | 0.62065500  |
| H  | 1.51600200  | 5.50504200  | -0.33368900 |
| H  | 0.74131600  | 4.68347100  | 1.01350300  |
| C  | -5.61472300 | -1.12775500 | 0.58860400  |
| H  | -5.20883900 | 0.97764200  | 0.55907400  |
| C  | -3.77868400 | -2.56822000 | -0.09234700 |
| O  | -1.70426800 | -1.66269000 | -0.70095200 |
| H  | -0.36541900 | 4.90728000  | -1.83921000 |
| H  | -0.98310700 | 5.75420100  | -0.42651200 |
| C  | -5.08171600 | -2.40791700 | 0.34177500  |
| H  | -6.63811200 | -1.01496600 | 0.92883400  |
| H  | -3.36013600 | -3.55069500 | -0.28245800 |
| H  | -5.70238800 | -3.28593100 | 0.49631900  |
| Cl | 2.75996000  | 1.46288100  | 2.31387100  |
| C  | 0.28751300  | -0.84481600 | 2.71089700  |
| C  | -1.12736700 | -1.18632900 | 2.49830900  |
| O  | -0.45476200 | -0.30210000 | 1.57317200  |
| H  | 0.54155500  | -0.05135400 | 3.40834000  |
| H  | -1.91503900 | -0.70334400 | 3.07228200  |
| H  | -1.37739700 | -2.15919300 | 2.08112700  |
| C  | 1.38692600  | -1.82380300 | 2.42781500  |
| H  | 2.28176300  | -1.27605900 | 2.12520600  |
| H  | 1.61866800  | -2.37071600 | 3.34868200  |
| H  | 1.09325200  | -2.53797400 | 1.65576400  |
| H  | -0.54530800 | 2.34883700  | -1.93884200 |
| H  | 0.47023600  | 2.14064400  | 0.93690400  |
| O  | -0.48290700 | -0.57983100 | -2.93720200 |
| H  | -1.21604600 | -1.19905900 | -2.78452000 |
| H  | 0.28757400  | -1.16244400 | -3.01995700 |

**H<sub>2</sub>O-Co<sup>III</sup>-Cl counterion addition in the middle carbon**

H<sub>2</sub>O-Co<sup>III</sup>-Cl + PO = H<sub>2</sub>O-Co<sup>III</sup>-PO-Cl

Charge: 0

Spin Multiplicity: 3

Sum of electronic and thermal Free Energies (a.u.): -1908.840118

Thermal correction to Gibbs Free Energy (a.u.): 0.417499

No imaginary frequency

Calculation of single point energy based on the optimized structure, Ep = -3147.5338766 a.u.

|    |             |             |             |
|----|-------------|-------------|-------------|
| C  | 4.83866200  | -1.13597900 | -1.78530100 |
| C  | 5.29846900  | 0.03228400  | -1.14595900 |
| C  | 3.48968500  | -1.42433200 | -1.86626900 |
| H  | 5.55644200  | -1.82617100 | -2.22016600 |
| C  | 4.37390100  | 0.89692100  | -0.59792200 |
| H  | 6.35996300  | 0.24623500  | -1.08685900 |
| C  | 2.52067800  | -0.56433000 | -1.29181600 |
| H  | 3.13034900  | -2.32565100 | -2.35099700 |
| C  | 2.98667200  | 0.62612600  | -0.65381300 |
| H  | 4.70318100  | 1.80646700  | -0.10108400 |
| O  | 1.25716100  | -0.88861100 | -1.39608500 |
| C  | 2.09151800  | 1.57840700  | -0.07407100 |
| Co | -0.21512500 | -0.04470400 | -0.52439100 |
| N  | 0.80500900  | 1.47318400  | 0.00325300  |
| H  | 2.55985400  | 2.47376900  | 0.33474200  |

|    |             |             |             |
|----|-------------|-------------|-------------|
| N  | -1.75476600 | 1.11687900  | -0.25984800 |
| C  | -0.03471100 | 2.47136200  | 0.68145700  |
| C  | -2.96007900 | 0.68786700  | -0.09551000 |
| C  | -1.35425600 | 2.51719200  | -0.11091300 |
| C  | 0.56558500  | 3.86811900  | 0.84769500  |
| H  | -3.74335300 | 1.39587100  | 0.18130500  |
| C  | -3.37292000 | -0.67631200 | -0.26048400 |
| C  | -2.36954200 | 3.45811000  | 0.53613100  |
| C  | -0.45676300 | 4.81736500  | 1.48985300  |
| H  | 0.86640700  | 4.25073700  | -0.13675200 |
| H  | 1.46476200  | 3.82769900  | 1.47062000  |
| C  | -4.69455500 | -1.02536600 | 0.09952900  |
| C  | -2.51137400 | -1.65995600 | -0.84315000 |
| C  | -1.76593700 | 4.86074700  | 0.69466700  |
| H  | -3.28052600 | 3.51079900  | -0.06969700 |
| H  | -2.65373700 | 3.06274300  | 1.52053300  |
| H  | -0.02645400 | 5.82096400  | 1.57080900  |
| H  | -0.66563500 | 4.48120600  | 2.51409300  |
| C  | -5.17638200 | -2.30672700 | -0.07892800 |
| H  | -5.33194000 | -0.25722400 | 0.53143100  |
| C  | -3.03778100 | -2.96235200 | -1.03196700 |
| O  | -1.28812100 | -1.41964700 | -1.24709700 |
| H  | -1.57468900 | 5.28605300  | -0.29944200 |
| H  | -2.48811200 | 5.52150600  | 1.18540200  |
| C  | -4.33080300 | -3.27467700 | -0.65438100 |
| H  | -6.18852200 | -2.56351700 | 0.21394600  |
| H  | -2.38191300 | -3.70300100 | -1.47659200 |
| H  | -4.69774800 | -4.28656300 | -0.80316500 |
| Cl | 2.66545700  | -1.54266800 | 2.16628200  |
| C  | 1.03719700  | -2.29557700 | 2.57168500  |
| C  | 0.06481700  | -2.05529800 | 1.41794200  |
| O  | -0.17822600 | -0.70058100 | 1.23336200  |
| H  | 0.69901000  | -1.73856000 | 3.44815500  |
| H  | -0.86779600 | -2.58952800 | 1.68185000  |
| H  | 0.46532600  | -2.53505900 | 0.51168800  |
| C  | 1.23553200  | -3.76936600 | 2.88740500  |
| H  | 1.94727300  | -3.90911200 | 3.70397100  |
| H  | 0.27716200  | -4.21219100 | 3.18225100  |
| H  | 1.60749900  | -4.30540800 | 2.00933200  |
| H  | -1.11468600 | 2.87778000  | -1.12114600 |
| H  | -0.26332700 | 2.04743600  | 1.66948000  |
| O  | -0.43451300 | 0.62383500  | -3.02007400 |
| H  | -1.08946800 | -0.08564100 | -2.92398800 |
| H  | 0.39849300  | 0.12495700  | -2.98792800 |

#### subsequent hydrolysis

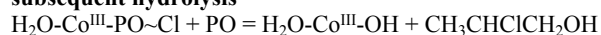

Charge: 0

Spin Multiplicity: 1

Sum of electronic and thermal Free Energies (a.u.): -1985.209025

Thermal correction to Gibbs Free Energy (a.u.): 0.445935

Imaginary frequencies: -245.97

Calculation of single point energy based on the optimized structure, Et = -3223.9634969 a.u.

|    |             |             |             |
|----|-------------|-------------|-------------|
| C  | 3.18393200  | -4.20448400 | -0.98975800 |
| C  | 4.07814000  | -3.24206800 | -1.49167500 |
| C  | 1.92240600  | -3.84673000 | -0.54657200 |
| H  | 3.48480400  | -5.24767500 | -0.94727200 |
| C  | 3.67773000  | -1.91978300 | -1.52900500 |
| H  | 5.06530600  | -3.53112200 | -1.83507300 |
| C  | 1.48513600  | -2.49975900 | -0.58364800 |
| H  | 1.22988900  | -4.58418000 | -0.15468100 |
| C  | 2.39595400  | -1.52157200 | -1.08988200 |
| H  | 4.35672500  | -1.15360100 | -1.89545400 |
| O  | 0.27380200  | -2.22802700 | -0.15407400 |
| C  | 2.08240800  | -0.11397900 | -1.10483400 |
| Co | -0.61636100 | -0.59499500 | -0.38226400 |
| N  | 0.94234100  | 0.40433600  | -0.80912100 |
| H  | 2.89893200  | 0.55306900  | -1.37711700 |
| N  | -1.55683700 | 1.04585600  | -0.56959900 |
| C  | 0.70590800  | 1.85546100  | -0.75889000 |

|    |             |             |             |
|----|-------------|-------------|-------------|
| C  | -2.76960600 | 1.24940800  | -0.17165500 |
| C  | -0.73736700 | 2.07299300  | -1.22831500 |
| C  | 1.67303900  | 2.73753200  | -1.54331200 |
| H  | -3.15851000 | 2.26752500  | -0.21015200 |
| C  | -3.68714800 | 0.24325000  | 0.27517500  |
| C  | -1.15630300 | 3.52889800  | -1.02494100 |
| C  | 1.27256000  | 4.20901300  | -1.35940700 |
| H  | 1.65353800  | 2.46621500  | -2.60830300 |
| H  | 2.69382200  | 2.59674200  | -1.17922700 |
| C  | -4.92725100 | 0.65245500  | 0.81101400  |
| C  | -3.41232900 | -1.14623700 | 0.09729000  |
| C  | -0.18385700 | 4.45851500  | -1.76839500 |
| H  | -2.17370500 | 3.69696700  | -1.39411800 |
| H  | -1.15191700 | 3.75548300  | 0.04875600  |
| H  | 1.94279600  | 4.85250900  | -1.93900200 |
| H  | 1.40853400  | 4.47748100  | -0.30434700 |
| C  | -5.88778400 | -0.26957700 | 1.18097700  |
| H  | -5.11452600 | 1.71672300  | 0.93309100  |
| C  | -4.41687400 | -2.06852300 | 0.46327500  |
| O  | -2.29650700 | -1.59500900 | -0.43391500 |
| H  | -0.29062500 | 4.29405900  | -2.84923300 |
| H  | -0.45874100 | 5.50206200  | -1.58225600 |
| C  | -5.62059400 | -1.63808000 | 0.99559400  |
| H  | -6.83310700 | 0.05487500  | 1.60200500  |
| H  | -4.20355100 | -3.12322800 | 0.32646300  |
| H  | -6.36907200 | -2.37305900 | 1.27904600  |
| Cl | 3.25094200  | 2.12510500  | 1.65761400  |
| C  | 2.59714000  | 0.89674500  | 2.88376400  |
| C  | 1.66695900  | -0.09119600 | 2.17251300  |
| O  | 0.52095500  | 0.49297100  | 1.69054000  |
| H  | 2.01542300  | 1.51259300  | 3.57199300  |
| H  | 1.45482100  | -0.88146700 | 2.92629700  |
| H  | 2.27154700  | -0.58474900 | 1.38811100  |
| C  | 3.77725200  | 0.23154700  | 3.57141400  |
| H  | 4.44221400  | 0.96668500  | 4.02993000  |
| H  | 3.40710000  | -0.43769600 | 4.35600700  |
| H  | 4.35569500  | -0.36269100 | 2.85758300  |
| H  | -0.77848300 | 1.83967200  | -2.30318100 |
| H  | 0.75750700  | 2.09563700  | 0.30715200  |
| O  | -1.39192800 | -0.98142800 | 1.94348000  |
| H  | -0.99380500 | -1.85888300 | 1.86771800  |
| H  | -0.59950500 | -0.32769700 | 2.04549600  |
| O  | -0.85594400 | -1.01849800 | -2.31973900 |
| H  | -0.23838800 | -1.75280200 | -2.47226000 |
| H  | -1.71723600 | -1.44577000 | -2.06994300 |

**subsequent hydrolysis**

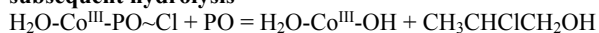

Charge: 0

Spin Multiplicity: 1

Sum of electronic and thermal Free Energies (a.u.): -1985.272883

Thermal correction to Gibbs Free Energy (a.u.): 0.446663

No imaginary frequency

Calculation of single point energy based on the optimized structure, Er = -3224.0302949 a.u.

|    |             |             |             |
|----|-------------|-------------|-------------|
| C  | 4.64260400  | -2.63203300 | -0.91616500 |
| C  | 5.29763400  | -1.38952000 | -0.81676300 |
| C  | 3.26262900  | -2.71418900 | -0.93882800 |
| H  | 5.22886400  | -3.54511700 | -0.97089100 |
| C  | 4.53459900  | -0.24283200 | -0.72993500 |
| H  | 6.38058800  | -1.33693800 | -0.79732100 |
| C  | 2.45713900  | -1.55054200 | -0.86952200 |
| H  | 2.75405600  | -3.67014700 | -1.00423000 |
| C  | 3.12068800  | -0.28901800 | -0.75172000 |
| H  | 5.01625900  | 0.72747600  | -0.63401700 |
| O  | 1.15388500  | -1.69016400 | -0.93223900 |
| C  | 2.40824900  | 0.94839400  | -0.58755100 |
| Co | -0.14842900 | -0.30592700 | -0.79593200 |
| N  | 1.12577300  | 1.08797500  | -0.57855700 |
| H  | 3.02889500  | 1.83038400  | -0.42601700 |
| N  | -1.46178700 | 1.07485400  | -0.83996100 |

|    |             |             |             |
|----|-------------|-------------|-------------|
| C  | 0.46217100  | 2.35064100  | -0.22348500 |
| C  | -2.70365200 | 0.89992100  | -0.53834900 |
| C  | -0.84388800 | 2.38912100  | -1.03638900 |
| C  | 1.27948900  | 3.62773200  | -0.40963800 |
| H  | -3.34591400 | 1.77488700  | -0.43126300 |
| C  | -3.33080500 | -0.37480500 | -0.33111800 |
| C  | -1.68932800 | 3.60758300  | -0.66908500 |
| C  | 0.42852100  | 4.85688500  | -0.05780400 |
| H  | 1.62649700  | 3.69341200  | -1.45002600 |
| H  | 2.16659200  | 3.60839800  | 0.23143400  |
| C  | -4.65502000 | -0.40667600 | 0.15604500  |
| C  | -2.66043900 | -1.59663100 | -0.64545000 |
| C  | -0.87391800 | 4.89362800  | -0.86494800 |
| H  | -2.59604500 | 3.64266700  | -1.28288300 |
| H  | -2.00433800 | 3.52515300  | 0.37921800  |
| H  | 1.00895200  | 5.76934800  | -0.22956700 |
| H  | 0.19054000  | 4.83055700  | 1.01337200  |
| C  | -5.31604300 | -1.60346200 | 0.36263100  |
| H  | -5.14939100 | 0.53624800  | 0.37845300  |
| C  | -3.35582400 | -2.80902000 | -0.42616600 |
| O  | -1.45353100 | -1.64302400 | -1.15864400 |
| H  | -0.63979800 | 5.01481000  | -1.93114200 |
| H  | -1.47662200 | 5.76070700  | -0.57546900 |
| C  | -4.64974400 | -2.80698900 | 0.06854400  |
| H  | -6.32973000 | -1.61523900 | 0.74809900  |
| H  | -2.82569000 | -3.73097500 | -0.63929400 |
| H  | -5.15547000 | -3.75418400 | 0.23514300  |
| Cl | 0.59584100  | 1.46421800  | 3.35894100  |
| C  | 0.40089600  | -0.37674800 | 3.26184800  |
| C  | 0.62322400  | -0.84145500 | 1.82844600  |
| O  | -0.41021300 | -0.37445400 | 1.01851800  |
| H  | -0.64171700 | -0.53780500 | 3.54134300  |
| H  | 0.66332400  | -1.94310100 | 1.84622900  |
| H  | 1.61784100  | -0.48668800 | 1.51916800  |
| C  | 1.35741900  | -1.02133300 | 4.25055400  |
| H  | 1.19819800  | -0.64307500 | 5.26258400  |
| H  | 1.19542400  | -2.10459100 | 4.25243500  |
| H  | 2.39649700  | -0.82934500 | 3.96722600  |
| H  | -0.56983300 | 2.44830500  | -2.09973000 |
| H  | 0.18296900  | 2.24124900  | 0.83203400  |
| O  | -0.23264300 | -3.75625500 | 0.58248700  |
| H  | 0.19020500  | -3.18853700 | -0.08456600 |
| H  | -0.97787700 | -3.20494800 | 0.85170200  |
| O  | -0.04763200 | -0.31775900 | -2.88799600 |
| H  | 0.68233400  | -0.95778300 | -2.94444500 |
| H  | -0.84374900 | -0.88526100 | -2.90770700 |

**subsequent hydrolysis**

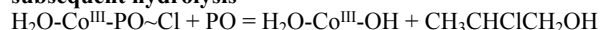

Charge: 0

Spin Multiplicity: 1

Sum of electronic and thermal Free Energies (a.u.): -1985.277818

Thermal correction to Gibbs Free Energy (a.u.): 0.446973

No imaginary frequency

Calculation of single point energy based on the optimized structure, Ep = -3224.0319789 a.u.

|    |             |             |             |
|----|-------------|-------------|-------------|
| C  | 2.90156900  | -4.25652400 | -0.90312100 |
| C  | 3.89590100  | -3.26252000 | -0.98132700 |
| C  | 1.55890300  | -3.92624700 | -0.86922800 |
| H  | 3.19141600  | -5.30309000 | -0.86250900 |
| C  | 3.50672200  | -1.93859500 | -1.03226400 |
| H  | 4.94603700  | -3.53272900 | -1.00072100 |
| C  | 1.13166000  | -2.57435600 | -0.90916500 |
| H  | 0.79014500  | -4.68902600 | -0.80312100 |
| C  | 2.14181500  | -1.56759100 | -1.00062600 |
| H  | 4.25138900  | -1.14819800 | -1.08473400 |
| O  | -0.15475900 | -2.32575400 | -0.88106800 |
| C  | 1.83362900  | -0.16617400 | -1.03047200 |
| Co | -0.95397400 | -0.62148300 | -0.62314800 |
| N  | 0.65632800  | 0.35395800  | -0.94284800 |
| H  | 2.69020100  | 0.50174400  | -1.09331200 |

|    |             |             |             |
|----|-------------|-------------|-------------|
| N  | -1.78843300 | 1.08012300  | -0.49250200 |
| C  | 0.48196100  | 1.80846200  | -0.77687500 |
| C  | -2.87098400 | 1.30612100  | 0.17100300  |
| C  | -0.97826800 | 2.11977300  | -1.13081400 |
| C  | 1.42388100  | 2.70411700  | -1.58392100 |
| H  | -3.19112600 | 2.33894100  | 0.31526800  |
| C  | -3.72553200 | 0.29060600  | 0.71584400  |
| C  | -1.32003700 | 3.57280400  | -0.80692900 |
| C  | 1.10106500  | 4.17815700  | -1.29606800 |
| H  | 1.30606400  | 2.48576700  | -2.65398700 |
| H  | 2.46438300  | 2.50856500  | -1.31634300 |
| C  | -4.79880900 | 0.68516800  | 1.54359500  |
| C  | -3.56184900 | -1.08680500 | 0.36616700  |
| C  | -0.37097600 | 4.50827400  | -1.57286600 |
| H  | -2.35806800 | 3.79494200  | -1.07812700 |
| H  | -1.21883700 | 3.73730000  | 0.27364100  |
| H  | 1.75142100  | 4.82419400  | -1.89518000 |
| H  | 1.33118100  | 4.38781600  | -0.24372000 |
| C  | -5.69774800 | -0.23651700 | 2.04561800  |
| H  | -4.90433600 | 1.74004700  | 1.78659100  |
| C  | -4.50557900 | -2.00766700 | 0.88115300  |
| O  | -2.62034200 | -1.52718400 | -0.43405100 |
| H  | -0.56871800 | 4.41215300  | -2.64893400 |
| H  | -0.58426000 | 5.54898200  | -1.30700000 |
| C  | -5.54084100 | -1.59145600 | 1.70037500  |
| H  | -6.51179400 | 0.07779900  | 2.68964700  |
| H  | -4.38090700 | -3.05164700 | 0.61368700  |
| H  | -6.24209800 | -2.32713500 | 2.08508000  |
| Cl | 3.96815500  | 1.77035500  | 1.04040000  |
| C  | 3.58128800  | 0.81494800  | 2.57440900  |
| C  | 2.28954600  | 0.03384700  | 2.40263100  |
| O  | 1.20325700  | 0.88862100  | 2.19648000  |
| H  | 3.43825000  | 1.59406500  | 3.32544900  |
| H  | 2.17923600  | -0.55346500 | 3.33486500  |
| H  | 2.41600700  | -0.69180300 | 1.58551300  |
| C  | 4.76838800  | -0.07662000 | 2.90017600  |
| H  | 5.68748900  | 0.50481800  | 2.99547400  |
| H  | 4.58593900  | -0.59426300 | 3.84837900  |
| H  | 4.91070800  | -0.82921600 | 2.11885700  |
| H  | -1.09240100 | 1.96178900  | -2.21327900 |
| H  | 0.63728000  | 1.99837600  | 0.29359900  |
| O  | -0.66387800 | -0.62602200 | 1.19142100  |
| H  | -0.58776200 | -1.56666600 | 1.40363000  |
| H  | 0.45281800  | 0.32259500  | 1.85185200  |
| O  | -1.43834300 | -0.79262800 | -2.62812600 |
| H  | -0.92050400 | -1.60938000 | -2.74803600 |
| H  | -2.32746800 | -1.12135400 | -2.38788900 |

**subsequent hydrolysis**

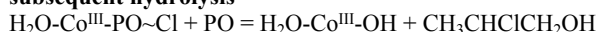

Charge: 0

Spin Multiplicity: 3

Sum of electronic and thermal Free Energies (a.u.): -1985.240869

Thermal correction to Gibbs Free Energy (a.u.): 0.437686

No imaginary frequency

Calculation of single point energy based on the optimized structure, Et = -3223.9899937 a.u.

|    |             |             |             |
|----|-------------|-------------|-------------|
| C  | 2.35037800  | -4.59880100 | -0.91130000 |
| C  | 3.14949300  | -3.87274000 | -1.81553600 |
| C  | 1.37572400  | -3.97511500 | -0.15432000 |
| H  | 2.49961200  | -5.66971500 | -0.80444900 |
| C  | 2.94592000  | -2.51282900 | -1.93790700 |
| H  | 3.91091200  | -4.37358400 | -2.40306000 |
| C  | 1.14462200  | -2.57913900 | -0.25925900 |
| H  | 0.76245400  | -4.52947900 | 0.54777600  |
| C  | 1.94958800  | -1.84475500 | -1.19008300 |
| H  | 3.55254200  | -1.92815500 | -2.62500300 |
| O  | 0.23809600  | -2.04038400 | 0.51269600  |
| C  | 1.81256200  | -0.42491400 | -1.34917100 |
| Co | -0.59716200 | -0.39552700 | 0.17929800  |
| N  | 0.85386200  | 0.29033700  | -0.86804300 |



|    |             |             |             |
|----|-------------|-------------|-------------|
| H  | 2.59243600  | 0.07466900  | -1.92390000 |
| N  | -1.46281500 | 1.25247200  | -0.31636800 |
| C  | 0.82793400  | 1.75650700  | -0.90020200 |
| C  | -2.72479600 | 1.47563800  | -0.15139600 |
| C  | -0.62784800 | 2.15453500  | -1.13582700 |
| C  | 1.75448500  | 2.46373900  | -1.88284500 |
| H  | -3.11364400 | 2.45761300  | -0.42872800 |
| C  | -3.69286600 | 0.51015900  | 0.27788100  |
| C  | -0.80144900 | 3.65569900  | -0.89327800 |
| C  | 1.59853900  | 3.98188000  | -1.69415000 |
| H  | 1.50735400  | 2.17510100  | -2.91365800 |
| H  | 2.79441500  | 2.18236400  | -1.69462800 |
| C  | -4.99040800 | 0.94216600  | 0.62526200  |
| C  | -3.40466600 | -0.88642400 | 0.19564100  |
| C  | 0.13801600  | 4.43378700  | -1.83052300 |
| H  | -1.83466400 | 3.97118500  | -1.07052000 |
| H  | -0.56700800 | 3.87163200  | 0.15612100  |
| H  | 2.22519100  | 4.51381900  | -2.41766400 |
| H  | 1.97110700  | 4.24608300  | -0.69667000 |
| C  | -5.99187300 | 0.03584700  | 0.91776500  |
| H  | -5.18931100 | 2.01035000  | 0.66519500  |
| C  | -4.45484800 | -1.79357600 | 0.46526700  |
| O  | -2.22788000 | -1.35974900 | -0.14887300 |
| H  | -0.19254700 | 4.28345900  | -2.86717700 |
| H  | 0.05413000  | 5.50672000  | -1.62798300 |
| C  | -5.71181800 | -1.34011900 | 0.82743800  |
| H  | -6.98139300 | 0.37797400  | 1.20055500  |
| H  | -4.23439700 | -2.85305300 | 0.39070400  |
| H  | -6.49492700 | -2.06151000 | 1.04380900  |
| Cl | 3.68066800  | 1.85927500  | 1.15761900  |
| C  | 3.08411200  | 0.89672500  | 2.62141700  |
| C  | 1.94372700  | -0.02560500 | 2.19380000  |
| O  | 0.81145700  | 0.67264000  | 1.80130200  |
| H  | 2.69982400  | 1.66556800  | 3.29427300  |
| H  | 1.74334500  | -0.67972700 | 3.06513400  |
| H  | 2.32872900  | -0.68414700 | 1.39865500  |
| C  | 4.26500600  | 0.15341900  | 3.22304600  |
| H  | 5.07982100  | 0.83492600  | 3.47611400  |
| H  | 3.94362400  | -0.35688500 | 4.13791100  |
| H  | 4.64558400  | -0.59836900 | 2.52519500  |
| H  | -0.87547300 | 1.92733100  | -2.18317200 |
| H  | 1.09463500  | 2.04612100  | 0.12140200  |
| O  | -1.30277600 | -0.27779000 | 2.15067900  |
| H  | -1.22553700 | -1.19593400 | 2.44576600  |
| H  | -0.29294400 | 0.20157300  | 2.26000700  |
| O  | -1.03332900 | -1.59135200 | -2.61451200 |
| H  | -0.43916700 | -2.34039700 | -2.47983600 |
| H  | -1.67177000 | -1.66707800 | -1.88250300 |

**subsequent hydrolysis**

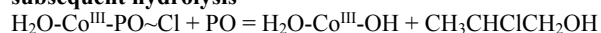

Charge: 0

Spin Multiplicity: 3

Sum of electronic and thermal Free Energies (a.u.): -1985.266958

Thermal correction to Gibbs Free Energy (a.u.): 0.440740

No imaginary frequency

Calculation of single point energy based on the optimized structure,  $E_r = -3224.0202296$  a.u.

|    |             |             |             |
|----|-------------|-------------|-------------|
| C  | 4.63704100  | -2.71551900 | -1.07461000 |
| C  | 5.24177000  | -1.46375600 | -1.31230800 |
| C  | 3.29239300  | -2.81676900 | -0.77792700 |
| H  | 5.23944800  | -3.61861900 | -1.12210600 |
| C  | 4.46498800  | -0.32714400 | -1.24099800 |
| H  | 6.30005700  | -1.39832900 | -1.53966100 |
| C  | 2.46604400  | -1.66279100 | -0.70245300 |
| H  | 2.82341600  | -3.77590500 | -0.58604900 |
| C  | 3.08116000  | -0.39355200 | -0.95035700 |
| H  | 4.90937400  | 0.65101900  | -1.40835900 |
| O  | 1.20546400  | -1.82685700 | -0.41019500 |
| C  | 2.34804800  | 0.82935100  | -0.84927300 |
| Co | -0.15368200 | -0.52656700 | -0.54368300 |

|    |             |             |             |
|----|-------------|-------------|-------------|
| N  | 1.07001600  | 0.93065200  | -0.68464000 |
| H  | 2.93682700  | 1.74530500  | -0.90028200 |
| N  | -1.50329800 | 0.81016100  | -0.86868100 |
| C  | 0.38936100  | 2.20204400  | -0.41545000 |
| C  | -2.75696700 | 0.61519800  | -0.64799200 |
| C  | -0.93692600 | 2.12935100  | -1.18748800 |
| C  | 1.15684000  | 3.48228600  | -0.73359900 |
| H  | -3.43306100 | 1.46877800  | -0.67987200 |
| C  | -3.35998500 | -0.66142100 | -0.38316500 |
| C  | -1.82194100 | 3.33750900  | -0.88086100 |
| C  | 0.27211400  | 4.69882600  | -0.42176400 |
| H  | 1.44976300  | 3.48891600  | -1.79272900 |
| H  | 2.07287900  | 3.53210100  | -0.13597500 |
| C  | -4.72959300 | -0.69975500 | -0.04257000 |
| C  | -2.63745500 | -1.88125300 | -0.55417100 |
| C  | -1.05843600 | 4.63646100  | -1.18038900 |
| H  | -2.73624600 | 3.30623900  | -1.48421900 |
| H  | -2.10390100 | 3.28804700  | 0.17740200  |
| H  | 0.80952800  | 5.62015200  | -0.67032400 |
| H  | 0.07307400  | 4.72500300  | 0.65670000  |
| C  | -5.39137600 | -1.89826800 | 0.14663500  |
| H  | -5.26035500 | 0.24239900  | 0.07212300  |
| C  | -3.34345900 | -3.09511300 | -0.38378100 |
| O  | -1.36567200 | -1.93627800 | -0.88254300 |
| H  | -0.86470500 | 4.70595700  | -2.25976300 |
| H  | -1.68346400 | 5.49671700  | -0.91850900 |
| C  | -4.68272000 | -3.10001200 | -0.03367200 |
| H  | -6.44077900 | -1.91336800 | 0.42017300  |
| H  | -2.79041600 | -4.01799200 | -0.52149800 |
| H  | -5.19191700 | -4.04961800 | 0.10599100  |
| Cl | 2.18840500  | 0.77807000  | 2.56864300  |
| C  | 0.77061200  | -0.09171600 | 3.37145400  |
| C  | 0.08598500  | -1.00128300 | 2.34988100  |
| O  | -0.52191000 | -0.26577800 | 1.34048800  |
| H  | 0.09149000  | 0.72229200  | 3.63394000  |
| H  | -0.66863700 | -1.58051600 | 2.91621600  |
| H  | 0.81349300  | -1.72219500 | 1.95217400  |
| C  | 1.28112600  | -0.83257200 | 4.59524200  |
| H  | 1.78588000  | -0.15610900 | 5.28825900  |
| H  | 0.43709000  | -1.29705000 | 5.11784100  |
| H  | 1.98325300  | -1.62041400 | 4.30683200  |
| H  | -0.69035000 | 2.10675700  | -2.25904800 |
| H  | 0.15201400  | 2.18581800  | 0.65450400  |
| O  | -1.77495100 | 1.92181400  | 2.15860600  |
| H  | -2.53564200 | 1.63355100  | 2.67623600  |
| H  | -1.34719300 | 1.07630000  | 1.85312800  |
| O  | 0.07408100  | -0.97865700 | -2.98079100 |
| H  | 0.90023500  | -1.47886500 | -2.93043900 |
| H  | -0.59949300 | -1.61652500 | -2.68379300 |

#### subsequent hydrolysis

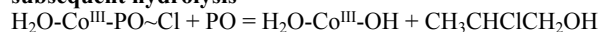

Charge: 0

Spin Multiplicity: 3

Sum of electronic and thermal Free Energies (a.u.): -1985.265285

Thermal correction to Gibbs Free Energy (a.u.): 0.441305

No imaginary frequency

Calculation of single point energy based on the optimized structure,  $E_p = -3224.0188319$  a.u.

|   |             |             |             |
|---|-------------|-------------|-------------|
| C | -3.03372300 | 3.97034800  | -1.38978400 |
| C | -3.97131100 | 2.92100500  | -1.42144000 |
| C | -1.68407500 | 3.72084200  | -1.21182800 |
| H | -3.37295400 | 4.99640800  | -1.50309000 |
| C | -3.52255300 | 1.62172000  | -1.28275800 |
| H | -5.02685100 | 3.12936900  | -1.55810200 |
| C | -1.20192200 | 2.40098800  | -1.03858700 |
| H | -0.95790000 | 4.52612300  | -1.18336100 |
| C | -2.15124600 | 1.33731600  | -1.08911100 |
| H | -4.22272700 | 0.79113600  | -1.29869400 |
| O | 0.08670500  | 2.21984600  | -0.85961300 |
| C | -1.75778500 | -0.03835600 | -0.97994700 |

|    |             |             |             |
|----|-------------|-------------|-------------|
| Co | 0.91723300  | 0.62024800  | -0.23263500 |
| N  | -0.57393900 | -0.46701000 | -0.70106000 |
| H  | -2.54658400 | -0.76964700 | -1.13386300 |
| N  | 1.94768700  | -1.01541700 | -0.47856100 |
| C  | -0.26883700 | -1.89774800 | -0.54586100 |
| C  | 3.15253400  | -1.18480000 | -0.04659600 |
| C  | 1.15116900  | -2.07829100 | -1.10373900 |
| C  | -1.25707300 | -2.87506700 | -1.17962400 |
| H  | 3.60698000  | -2.17325600 | -0.13130900 |
| C  | 3.97429000  | -0.16951300 | 0.54335900  |
| C  | 1.64824700  | -3.51096000 | -0.91603100 |
| C  | -0.75575200 | -4.31515800 | -0.99925500 |
| H  | -1.36646400 | -2.64530300 | -2.24837000 |
| H  | -2.23702800 | -2.76892100 | -0.70775000 |
| C  | 5.23667900  | -0.54979300 | 1.05700200  |
| C  | 3.57994800  | 1.20656000  | 0.57631700  |
| C  | 0.66066000  | -4.49895400 | -1.55492500 |
| H  | 2.63954700  | -3.63646500 | -1.36492800 |
| H  | 1.74416900  | -3.72153400 | 0.15747700  |
| H  | -1.44834500 | -5.00913100 | -1.48660900 |
| H  | -0.76285600 | -4.56347900 | 0.06996700  |
| C  | 6.10242900  | 0.37477300  | 1.60363800  |
| H  | 5.51431500  | -1.60037200 | 1.01543200  |
| C  | 4.49438600  | 2.13699100  | 1.13339900  |
| O  | 2.45252000  | 1.66513200  | 0.09218100  |
| H  | 0.64930300  | -4.34320400 | -2.64195900 |
| H  | 1.00686700  | -5.52442900 | -1.38843200 |
| C  | 5.71668200  | 1.72940900  | 1.63328500  |
| H  | 7.06316400  | 0.06672100  | 2.00113700  |
| H  | 4.19310100  | 3.17886800  | 1.15121500  |
| H  | 6.38941100  | 2.46913000  | 2.05852300  |
| Cl | -4.37978000 | -1.57537100 | 0.81041200  |
| C  | -4.04950300 | -0.64197300 | 2.37285300  |
| C  | -2.68672800 | 0.02649200  | 2.32082000  |
| O  | -1.66328500 | -0.92081700 | 2.21128300  |
| H  | -4.04332000 | -1.42410000 | 3.13418500  |
| H  | -2.61173300 | 0.60592500  | 3.26079600  |
| H  | -2.67639200 | 0.75652800  | 1.49826500  |
| C  | -5.18119800 | 0.35047400  | 2.58445800  |
| H  | -6.15120900 | -0.15037600 | 2.59666800  |
| H  | -5.04319500 | 0.86186300  | 3.54350500  |
| H  | -5.18641100 | 1.10268700  | 1.79003000  |
| H  | 1.11671700  | -1.84183200 | -2.17656400 |
| H  | -0.24484200 | -2.07786000 | 0.53588000  |
| O  | 0.47156100  | 0.46649200  | 1.58667400  |
| H  | 0.89645400  | 1.18497500  | 2.07322800  |
| H  | -0.81999900 | -0.41051400 | 2.07480800  |
| O  | 1.79159200  | 1.07459900  | -2.67256300 |
| H  | 1.13609800  | 1.76708400  | -2.47964000 |
| H  | 2.55277200  | 1.37535900  | -2.15453200 |

six-coordinated H<sub>2</sub>O-Co<sup>III</sup>-OAc counterion addition in the terminal carbon and subsequent hydrolysis

**H<sub>2</sub>O-Co<sup>III</sup>-OAc counterion addition in the terminal carbon**

H<sub>2</sub>O-Co<sup>III</sup>-OAc + PO = H<sub>2</sub>O-Co<sup>III</sup>-PO-OAc

Charge: 0

Spin Multiplicity: 1

Sum of electronic and thermal Free Energies (a.u.): -1677.012502

Thermal correction to Gibbs Free Energy (a.u.): 0.468060

Imaginary frequencies: -368.72

Calculation of single point energy based on the optimized structure, Et = -2915.816743 a.u.

|   |            |             |             |
|---|------------|-------------|-------------|
| C | 3.75307500 | -3.93985700 | -0.55338900 |
| C | 4.67642800 | -2.87947300 | -0.59121500 |
| C | 2.39001100 | -3.70393700 | -0.60035300 |
| H | 4.11198400 | -4.96274400 | -0.47906600 |
| C | 4.19830500 | -1.58628100 | -0.67830100 |
| H | 5.74221200 | -3.07381800 | -0.54491600 |
| C | 1.87707300 | -2.38666600 | -0.69083200 |
| H | 1.67306500 | -4.51737300 | -0.56180200 |
| C | 2.81373100 | -1.31124500 | -0.73635500 |

|    |             |             |             |
|----|-------------|-------------|-------------|
| H  | 4.88954000  | -0.74754800 | -0.69577000 |
| O  | 0.57256600  | -2.23004100 | -0.72768100 |
| C  | 2.40178200  | 0.06376100  | -0.79524200 |
| Co | -0.37210300 | -0.58748000 | -0.79136400 |
| N  | 1.18979900  | 0.48717700  | -0.90066000 |
| H  | 3.20121000  | 0.79734000  | -0.73015400 |
| N  | -1.34574400 | 1.03947200  | -1.01519000 |
| C  | 0.85469800  | 1.90612600  | -0.72327100 |
| C  | -2.56492100 | 1.21355500  | -0.63337600 |
| C  | -0.46865800 | 2.12675800  | -1.46775200 |
| C  | 1.92387500  | 2.91137400  | -1.14669700 |
| H  | -2.98076700 | 2.22121700  | -0.65751900 |
| C  | -3.44888600 | 0.17704500  | -0.18028500 |
| C  | -0.98734500 | 3.55050300  | -1.27697300 |
| C  | 1.39983300  | 4.34521400  | -0.98349000 |
| H  | 2.21165400  | 2.72895400  | -2.19128300 |
| H  | 2.81283100  | 2.78226700  | -0.52392000 |
| C  | -4.70778000 | 0.54877700  | 0.34055600  |
| C  | -3.10457300 | -1.20525800 | -0.29037300 |
| C  | 0.07848600  | 4.55920300  | -1.72972000 |
| H  | -1.91233100 | 3.70334200  | -1.84412800 |
| H  | -1.22016200 | 3.71110900  | -0.21618400 |
| H  | 2.15469800  | 5.05663800  | -1.33428900 |
| H  | 1.24915100  | 4.54867300  | 0.08437700  |
| C  | -5.62109200 | -0.39835300 | 0.76258300  |
| H  | -4.94611300 | 1.60736300  | 0.41197800  |
| C  | -4.06436400 | -2.15658900 | 0.13122400  |
| O  | -1.96550000 | -1.63412400 | -0.78149800 |
| H  | 0.24501900  | 4.44828800  | -2.80971000 |
| H  | -0.28868400 | 5.57864000  | -1.57182700 |
| C  | -5.28648500 | -1.76005100 | 0.64709100  |
| H  | -6.57962300 | -0.09911000 | 1.17183300  |
| H  | -3.79908400 | -3.20498300 | 0.04608200  |
| H  | -5.99587300 | -2.51603600 | 0.97232700  |
| C  | -0.50820300 | -1.38939800 | 1.92001500  |
| C  | 0.85759200  | -1.02538200 | 2.31716100  |
| O  | -0.44639700 | -0.26264800 | 1.03792600  |
| H  | -0.59389100 | -2.33172500 | 1.37219000  |
| H  | 1.70023000  | -1.42943700 | 1.77486000  |
| H  | 1.03831400  | -0.45050800 | 3.22511100  |
| C  | -1.59613800 | -1.21281100 | 2.96004700  |
| H  | -2.58092300 | -1.25377600 | 2.48825300  |
| H  | -1.53497300 | -2.01089200 | 3.70883400  |
| H  | -1.47530500 | -0.25013100 | 3.46400200  |
| H  | -0.28584300 | 1.95060200  | -2.53767300 |
| H  | 0.67872700  | 2.00803200  | 0.35453400  |
| C  | 2.64777300  | 3.02628800  | 2.75539700  |
| H  | 2.87974300  | 3.42680300  | 3.74399200  |
| H  | 1.94898100  | 3.71277800  | 2.26176200  |
| H  | 3.55317100  | 2.97681100  | 2.14396900  |
| C  | 1.98839000  | 1.64259400  | 2.87674400  |
| O  | 2.02946500  | 0.93345600  | 1.80607400  |
| O  | 1.45157900  | 1.32459600  | 3.95290800  |
| O  | -0.45906300 | -0.98188100 | -2.79793200 |
| H  | 0.12047400  | -1.76423100 | -2.75068700 |
| H  | -1.35588700 | -1.36138000 | -2.71494100 |

**H<sub>2</sub>O-Co<sup>III</sup>-OAc counterion addition in the terminal carbon**

H<sub>2</sub>O-Co<sup>III</sup>-OAc + PO = H<sub>2</sub>O-Co<sup>III</sup>-PO-OAc

Charge: 0

Spin Multiplicity: 1

Sum of electronic and thermal Free Energies (a.u.): -1677.050234

Thermal correction to Gibbs Free Energy (a.u.): 0.467831

No imaginary frequency

Calculation of single point energy based on the optimized structure, Er = -2915.8546316 a.u.

|   |            |             |             |
|---|------------|-------------|-------------|
| C | 2.98355600 | -4.52535300 | -0.36380000 |
| C | 4.06062800 | -3.62387000 | -0.37655400 |
| C | 1.67664700 | -4.07905100 | -0.48367700 |
| H | 3.17222000 | -5.58931700 | -0.24959500 |
| C | 3.79871800 | -2.27353800 | -0.52050900 |

|    |             |             |             |
|----|-------------|-------------|-------------|
| H  | 5.07899000  | -3.97991900 | -0.26618000 |
| C  | 1.38949700  | -2.70319100 | -0.62611600 |
| H  | 0.83916300  | -4.76888100 | -0.46605100 |
| C  | 2.47978900  | -1.79047900 | -0.65813900 |
| H  | 4.60843300  | -1.54991800 | -0.50861400 |
| O  | 0.11993700  | -2.34206500 | -0.72899900 |
| C  | 2.29680000  | -0.36766400 | -0.78153100 |
| Co | -0.54649700 | -0.57584000 | -0.77375900 |
| N  | 1.16072700  | 0.23965600  | -0.89087300 |
| H  | 3.19757300  | 0.23206200  | -0.75102700 |
| N  | -1.25368400 | 1.19114300  | -0.92903600 |
| C  | 1.07203700  | 1.69890000  | -0.73862000 |
| C  | -2.41225100 | 1.54377300  | -0.48792600 |
| C  | -0.23316700 | 2.13860700  | -1.40545000 |
| C  | 2.26160700  | 2.51142100  | -1.24650300 |
| H  | -2.65894600 | 2.60531500  | -0.46930200 |
| C  | -3.43276400 | 0.64552500  | -0.01972800 |
| C  | -0.50802700 | 3.61825700  | -1.14130200 |
| C  | 1.99384500  | 3.99896100  | -0.97533400 |
| H  | 2.41905200  | 2.33016500  | -2.31987300 |
| H  | 3.15831100  | 2.20781100  | -0.70308600 |
| C  | -4.59004100 | 1.19301500  | 0.57469600  |
| C  | -3.32498600 | -0.76735400 | -0.19604900 |
| C  | 0.68279100  | 4.46442600  | -1.61883800 |
| H  | -1.42371300 | 3.94034500  | -1.65115100 |
| H  | -0.65187300 | 3.76579900  | -0.06371700 |
| H  | 2.83009400  | 4.60248000  | -1.34424000 |
| H  | 1.94280900  | 4.13748500  | 0.111108900 |
| C  | -5.62780300 | 0.38791100  | 1.00628300  |
| H  | -4.64956000 | 2.27211700  | 0.69390700  |
| C  | -4.40803000 | -1.56931500 | 0.23547100  |
| O  | -2.28980000 | -1.35203700 | -0.75704700 |
| H  | 0.76191300  | 4.39030100  | -2.71236200 |
| H  | 0.49398400  | 5.51841100  | -1.38854700 |
| C  | -5.52698200 | -1.00274100 | 0.82418600  |
| H  | -6.50683900 | 0.82059600  | 1.47089500  |
| H  | -4.32470700 | -2.64163700 | 0.09323500  |
| H  | -6.33769800 | -1.64722300 | 1.15261000  |
| C  | -0.64335500 | -1.45772800 | 2.06623000  |
| C  | 0.46845100  | -0.49770700 | 2.09395300  |
| O  | -0.62647500 | -0.32716000 | 1.12159400  |
| H  | -0.47232500 | -2.39758400 | 1.54922200  |
| H  | 1.43374800  | -0.72636300 | 1.65729300  |
| H  | 0.48442000  | 0.33212700  | 2.79204400  |
| C  | -1.78495400 | -1.40782300 | 3.03824800  |
| H  | -2.71924900 | -1.69624600 | 2.54906300  |
| H  | -1.59358800 | -2.10572000 | 3.86037500  |
| H  | -1.89809100 | -0.40262100 | 3.45161900  |
| H  | -0.14660200 | 1.97016000  | -2.48918000 |
| H  | 1.00836800  | 1.87894900  | 0.35370600  |
| C  | 3.82832800  | 2.39236300  | 3.12393900  |
| H  | 3.32991100  | 2.95984200  | 3.91295900  |
| H  | 4.48145300  | 3.07561500  | 2.56788000  |
| H  | 4.46538700  | 1.61548600  | 3.55546300  |
| C  | 2.80820700  | 1.77438700  | 2.15214600  |
| O  | 3.23054100  | 0.82778900  | 1.42507100  |
| O  | 1.64720400  | 2.27849400  | 2.14361300  |
| O  | -0.69266700 | -0.90059800 | -2.73071100 |
| H  | -0.23700300 | -1.76473100 | -2.71113600 |
| H  | -1.64068000 | -1.13861300 | -2.68508700 |

**H<sub>2</sub>O-Co<sup>III</sup>-OAc counterion addition in the terminal carbon**

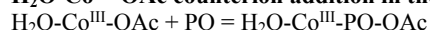

Charge: 0

Spin Multiplicity: 1

Sum of electronic and thermal Free Energies (a.u.): -1677.096521

Thermal correction to Gibbs Free Energy (a.u.): 0.471962

No imaginary frequency

Calculation of single point energy based on the optimized structure, Ep = -2915.9012378 a.u.

|   |            |             |             |
|---|------------|-------------|-------------|
| C | 4.04143300 | -3.73848300 | -0.38994500 |
|---|------------|-------------|-------------|

|    |             |             |             |
|----|-------------|-------------|-------------|
| C  | 4.83430000  | -2.69204900 | -0.90284000 |
| C  | 2.69862700  | -3.55565400 | -0.12219100 |
| H  | 4.49342400  | -4.70769700 | -0.19697700 |
| C  | 4.24437300  | -1.46592600 | -1.13063100 |
| H  | 5.88847100  | -2.84669300 | -1.10469100 |
| C  | 2.05918600  | -2.30803900 | -0.35929700 |
| H  | 2.08668300  | -4.35555700 | 0.28119600  |
| C  | 2.86987300  | -1.24489900 | -0.87851800 |
| H  | 4.83676000  | -0.63699000 | -1.51162500 |
| O  | 0.78706200  | -2.20171800 | -0.08656600 |
| C  | 2.34593000  | 0.07567500  | -1.08390300 |
| Co | -0.34395300 | -0.75775700 | -0.59260800 |
| N  | 1.10581600  | 0.40929200  | -0.97058200 |
| H  | 3.07624900  | 0.84706600  | -1.33039400 |
| N  | -1.46590500 | 0.65377100  | -1.23863300 |
| C  | 0.62737400  | 1.79029000  | -1.03877500 |
| C  | -2.71519800 | 0.76489300  | -0.93646400 |
| C  | -0.68342800 | 1.73487400  | -1.84850200 |
| C  | 1.59952700  | 2.82897500  | -1.59010000 |
| H  | -3.23675600 | 1.68743900  | -1.19479300 |
| C  | -3.50536300 | -0.23106100 | -0.27244600 |
| C  | -1.35008100 | 3.10912500  | -1.91410800 |
| C  | 0.92164000  | 4.20460800  | -1.65491500 |
| H  | 1.93269000  | 2.53182000  | -2.59410900 |
| H  | 2.48867000  | 2.88329000  | -0.95295100 |
| C  | -4.82756400 | 0.10534000  | 0.09394400  |
| C  | -3.00493100 | -1.54408000 | -0.00574000 |
| C  | -0.37283700 | 4.15257300  | -2.47415800 |
| H  | -2.25007900 | 3.07002900  | -2.53728000 |
| H  | -1.66438600 | 3.40286500  | -0.90400700 |
| H  | 1.61255400  | 4.94036100  | -2.07966300 |
| H  | 0.69234500  | 4.53963500  | -0.63458900 |
| C  | -5.65523900 | -0.80324100 | 0.72461700  |
| H  | -5.18529300 | 1.10906100  | -0.12481600 |
| C  | -3.87576300 | -2.45793200 | 0.63620000  |
| O  | -1.81164800 | -1.95176600 | -0.35947200 |
| H  | -0.13320300 | 3.90270900  | -3.51644100 |
| H  | -0.85352400 | 5.13632400  | -2.49053000 |
| C  | -5.16277000 | -2.09443200 | 0.99136400  |
| H  | -6.66501300 | -0.52827300 | 1.00925300  |
| H  | -3.49046700 | -3.45072000 | 0.84284100  |
| H  | -5.80138600 | -2.81934000 | 1.48901700  |
| C  | -0.00362700 | -0.48896000 | 2.19586300  |
| C  | 1.47872700  | -0.10291700 | 2.33003900  |
| O  | -0.58623300 | 0.03698000  | 1.04182500  |
| H  | -0.02451200 | -1.59120600 | 2.19505500  |
| H  | 2.07979600  | -0.62972000 | 1.59223600  |
| H  | 1.85762900  | -0.31207500 | 3.33271500  |
| C  | -0.84853900 | 0.01223500  | 3.37302600  |
| H  | -1.87287600 | -0.35098200 | 3.25733600  |
| H  | -0.44509700 | -0.33245300 | 4.33013600  |
| H  | -0.87311100 | 1.10559000  | 3.38581500  |
| H  | -0.42643500 | 1.40917500  | -2.86700400 |
| H  | 0.36136300  | 2.03786800  | -0.00382000 |
| C  | 1.89076400  | 3.58148400  | 2.54691500  |
| H  | 2.13599700  | 4.25362900  | 3.36852900  |
| H  | 0.93073400  | 3.87636300  | 2.11037400  |
| H  | 2.64676800  | 3.65152600  | 1.76019000  |
| C  | 1.78841400  | 2.16260000  | 3.06221000  |
| O  | 1.68317200  | 1.30231200  | 2.03126400  |
| O  | 1.79117800  | 1.84865200  | 4.23268000  |
| O  | -0.35203000 | -1.67299700 | -2.48555600 |
| H  | 0.32861400  | -2.34898100 | -2.33864600 |
| H  | -1.18022500 | -2.11777300 | -2.21070800 |

**subsequent hydrolysis**

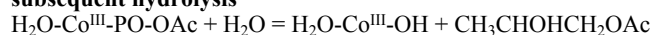

Charge: 0

Spin Multiplicity: 3

Sum of electronic and thermal Free Energies (a.u.): -1753.485774

Thermal correction to Gibbs Free Energy (a.u.): 0.485394

Imaginary frequencies: -612.42

Calculation of single point energy based on the optimized structure, Et = -2992.3459953 a.u.

|    |             |             |             |
|----|-------------|-------------|-------------|
| C  | -0.43354900 | 5.19910100  | -0.51293800 |
| C  | -1.12890500 | 4.88395600  | -1.69717900 |
| C  | 0.04562300  | 4.20904400  | 0.32392500  |
| H  | -0.26703700 | 6.24032200  | -0.25106500 |
| C  | -1.33687200 | 3.55635500  | -2.01112000 |
| H  | -1.49863000 | 5.67081400  | -2.34514600 |
| C  | -0.13783200 | 2.83477100  | 0.02225400  |
| H  | 0.57742800  | 4.44914600  | 1.23807800  |
| C  | -0.84783600 | 2.51630000  | -1.18621600 |
| H  | -1.88135100 | 3.28535800  | -2.91244900 |
| O  | 0.30437500  | 1.94681800  | 0.87398400  |
| C  | -1.15219600 | 1.15782300  | -1.54030700 |
| Co | 0.77532400  | 0.20045600  | 0.34815100  |
| N  | -0.62917300 | 0.12938500  | -0.96943300 |
| H  | -1.89118000 | 1.00494700  | -2.32874700 |
| N  | 1.24259500  | -1.51311200 | -0.37809900 |
| C  | -1.03996300 | -1.25899300 | -1.16134000 |
| C  | 2.43206900  | -2.01684200 | -0.30801100 |
| C  | 0.24748900  | -2.07252000 | -1.31716700 |
| C  | -2.02460200 | -1.57857500 | -2.27773000 |
| H  | 2.59747000  | -3.00396900 | -0.74732500 |
| C  | 3.58758500  | -1.34505600 | 0.20632600  |
| C  | -0.07123500 | -3.56098300 | -1.16871700 |
| C  | -2.35239500 | -3.08147300 | -2.21578100 |
| H  | -1.59636300 | -1.31938200 | -3.25537000 |
| H  | -2.94069600 | -0.99387300 | -2.14769600 |
| C  | 4.76198900  | -2.08458600 | 0.46338100  |
| C  | 3.61016600  | 0.08310500  | 0.29307000  |
| C  | -1.09159600 | -3.95947600 | -2.24980900 |
| H  | 0.83150500  | -4.17258300 | -1.26873100 |
| H  | -0.47579900 | -3.73470300 | -0.16459500 |
| H  | -3.02123500 | -3.35371800 | -3.03905100 |
| H  | -2.89986400 | -3.27834000 | -1.28573200 |
| C  | 5.93491200  | -1.45629700 | 0.83465600  |
| H  | 4.72534900  | -3.16730700 | 0.37180000  |
| C  | 4.83256600  | 0.70273900  | 0.64222000  |
| O  | 2.56776700  | 0.83679100  | 0.02424400  |
| H  | -0.61520600 | -3.86937500 | -3.23528800 |
| H  | -1.36649900 | -5.01274600 | -2.13072500 |
| C  | 5.96006500  | -0.05099400 | 0.91644500  |
| H  | 6.82711700  | -2.03454000 | 1.04871800  |
| H  | 4.84692500  | 1.78590200  | 0.69720200  |
| H  | 6.88126700  | 0.45235600  | 1.19644200  |
| H  | 0.64175800  | -1.88713700 | -2.32642000 |
| H  | -1.48639800 | -1.53220600 | -0.19941500 |
| O  | 1.46608800  | -0.28237300 | 2.25258200  |
| H  | 1.51214700  | 0.57590800  | 2.69655800  |
| H  | 0.38217200  | -0.63083400 | 2.26390700  |
| O  | 1.86747200  | 1.35179200  | -2.65271500 |
| H  | 1.43591900  | 2.21058800  | -2.56167600 |
| H  | 2.27939600  | 1.21878700  | -1.78024800 |
| C  | -1.72084200 | -0.04594500 | 2.43906000  |
| C  | -2.73277000 | 0.66123600  | 1.53912200  |
| O  | -0.75545300 | -0.75895600 | 1.70719900  |
| H  | -1.24577900 | 0.77788600  | 3.00657600  |
| H  | -2.22244800 | 1.35043400  | 0.87167900  |
| H  | -3.47078200 | 1.19827100  | 2.13755800  |
| C  | -2.39599900 | -0.99541500 | 3.43370200  |
| H  | -1.64695300 | -1.41200400 | 4.11286300  |
| H  | -3.16991500 | -0.48964000 | 4.01918600  |
| H  | -2.85756800 | -1.82852200 | 2.89489200  |
| C  | -5.23660500 | -1.65273600 | 0.06271300  |
| H  | -6.29254400 | -1.81995100 | 0.27169800  |
| H  | -4.68593800 | -2.58939100 | 0.19378500  |
| H  | -5.10263100 | -1.33464000 | -0.97451800 |
| C  | -4.69291900 | -0.61314100 | 1.01477400  |

O -3.42826200 -0.27539500 0.67573000  
O -5.30066600 -0.15248400 1.95571400

**subsequent hydrolysis**

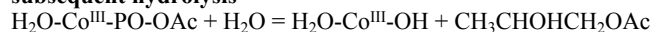

Charge: 0

Spin Multiplicity: 3

Sum of electronic and thermal Free Energies (a.u.): -1753.515029

Thermal correction to Gibbs Free Energy (a.u.): 0.490883

No imaginary frequency

Calculation of single point energy based on the optimized structure,  $E_r = -2992.3758712$  a.u.

|    |             |             |             |
|----|-------------|-------------|-------------|
| C  | -4.36649800 | 3.55724600  | 0.12237900  |
| C  | -5.10325700 | 2.53772300  | -0.51651100 |
| C  | -3.01305700 | 3.42320300  | 0.35866900  |
| H  | -4.87269500 | 4.46530600  | 0.43828300  |
| C  | -4.44776700 | 1.38933900  | -0.90500600 |
| H  | -6.16680100 | 2.65522700  | -0.69220800 |
| C  | -2.30781500 | 2.25255900  | -0.03460400 |
| H  | -2.44330800 | 4.20021000  | 0.85693000  |
| C  | -3.05823000 | 1.21986900  | -0.68853800 |
| H  | -4.99444000 | 0.58495600  | -1.39136500 |
| O  | -1.03364000 | 2.18276300  | 0.22938600  |
| C  | -2.45501400 | -0.01498900 | -1.08614800 |
| Co | 0.18664200  | 0.89781400  | -0.43220200 |
| N  | -1.19280500 | -0.28861300 | -1.03016500 |
| H  | -3.13704200 | -0.78496200 | -1.44789300 |
| N  | 1.38046400  | -0.33927300 | -1.29327000 |
| C  | -0.64097400 | -1.62048600 | -1.30465300 |
| C  | 2.64838000  | -0.36514900 | -1.06826800 |
| C  | 0.67331600  | -1.37426900 | -2.06171200 |
| C  | -1.54283900 | -2.60642400 | -2.04166600 |
| H  | 3.23015800  | -1.20595800 | -1.44311900 |
| C  | 3.38111700  | 0.65571600  | -0.37250500 |
| C  | 1.43099200  | -2.68170900 | -2.29379500 |
| C  | -0.78446200 | -3.92231700 | -2.27170300 |
| H  | -1.85771700 | -2.17953200 | -3.00395900 |
| H  | -2.44769800 | -2.80106900 | -1.45587200 |
| C  | 4.74527300  | 0.43015000  | -0.08912500 |
| C  | 2.79007100  | 1.91604200  | -0.05589900 |
| C  | 0.53010400  | -3.68844700 | -3.02472300 |
| H  | 2.33237400  | -2.50015300 | -2.88981800 |
| H  | 1.73780500  | -3.07454100 | -1.31784000 |
| H  | -1.41988900 | -4.62406800 | -2.82230400 |
| H  | -0.56816700 | -4.38226500 | -1.29943000 |
| C  | 5.52640800  | 1.40223300  | 0.50710100  |
| H  | 5.17415300  | -0.53518400 | -0.34673000 |
| C  | 3.61586600  | 2.90470000  | 0.52653900  |
| O  | 1.53073500  | 2.21283700  | -0.29685300 |
| H  | 0.30808400  | -3.31550800 | -4.03407900 |
| H  | 1.06632800  | -4.63476700 | -3.15158900 |
| C  | 4.94701200  | 2.64791400  | 0.80810800  |
| H  | 6.57007400  | 1.21156400  | 0.73214200  |
| H  | 3.16188300  | 3.86181600  | 0.75953200  |
| H  | 5.55080400  | 3.42277100  | 1.27230100  |
| H  | 0.41411800  | -0.91593800 | -3.02724800 |
| H  | -0.38790800 | -2.03295000 | -0.32311100 |
| O  | 1.58348800  | -2.50991800 | 1.01960500  |
| H  | 2.19186400  | -2.59613900 | 1.76248000  |
| H  | 1.20202500  | -1.59231100 | 1.11536500  |
| O  | -0.02518700 | 2.23226900  | -2.53220200 |
| H  | -0.77618600 | 2.76998600  | -2.24569300 |
| H  | 0.73095100  | 2.62987700  | -2.06400400 |
| C  | -0.05981700 | 0.24537900  | 2.42294600  |
| C  | -1.48897900 | -0.33372600 | 2.46260200  |
| O  | 0.54932000  | -0.06641200 | 1.20103300  |
| H  | -0.18362700 | 1.33563900  | 2.52532500  |
| H  | -2.14260700 | 0.25683100  | 1.82139300  |
| H  | -1.88617200 | -0.35822600 | 3.48009600  |
| C  | 0.83158700  | -0.24733200 | 3.56727600  |
| H  | 1.80934700  | 0.23794000  | 3.49179000  |



|   |             |             |            |
|---|-------------|-------------|------------|
| H | 0.39429800  | -0.01551900 | 4.54334400 |
| H | 0.97125800  | -1.32970400 | 3.51503600 |
| C | -1.22925000 | -3.98957000 | 1.93710100 |
| H | -1.34567700 | -4.84961700 | 2.59616100 |
| H | -0.22322900 | -3.97634200 | 1.50131000 |
| H | -1.95600600 | -4.02938400 | 1.12154700 |
| C | -1.37067300 | -2.71421000 | 2.72756400 |
| O | -1.53755300 | -1.66260700 | 1.89464100 |
| O | -1.30444800 | -2.62448900 | 3.93490900 |

**subsequent hydrolysis**



Charge: 0

Spin Multiplicity: 3

Sum of electronic and thermal Free Energies (a.u.): -1753.513556

Thermal correction to Gibbs Free Energy (a.u.): 0.490498

No imaginary frequency

Calculation of single point energy based on the optimized structure, Ep = -2992.3751607 a.u.

|    |             |             |             |
|----|-------------|-------------|-------------|
| C  | -1.23399300 | 5.52056600  | 0.57361900  |
| C  | -2.50813900 | 4.95776400  | 0.36991700  |
| C  | -0.08373700 | 4.77469000  | 0.38857900  |
| H  | -1.14968500 | 6.55834600  | 0.88417000  |
| C  | -2.59616200 | 3.63927600  | -0.03043500 |
| H  | -3.40304600 | 5.55184300  | 0.51902900  |
| C  | -0.14808100 | 3.41278900  | 0.00569700  |
| H  | 0.90049900  | 5.20220700  | 0.54695100  |
| C  | -1.44081400 | 2.84617700  | -0.21529000 |
| H  | -3.56810200 | 3.18511400  | -0.20796900 |
| O  | 0.97429200  | 2.75092700  | -0.14588100 |
| C  | -1.60936200 | 1.50818200  | -0.70115000 |
| Co | 1.12259200  | 0.85815600  | -0.25684500 |
| N  | -0.67308300 | 0.63519900  | -0.86762500 |
| H  | -2.62843100 | 1.22166700  | -0.95823400 |
| N  | 1.41891700  | -0.88348100 | -1.04682900 |
| C  | -0.95149100 | -0.73475500 | -1.33473300 |
| C  | 2.37842100  | -1.67278700 | -0.69740700 |
| C  | 0.34355300  | -1.25633900 | -1.97092000 |
| C  | -2.12685300 | -0.89921000 | -2.29515700 |
| H  | 2.38049600  | -2.69669200 | -1.07194800 |
| C  | 3.47684500  | -1.30562000 | 0.14806100  |
| C  | 0.21031500  | -2.74220800 | -2.30176000 |
| C  | -2.27911500 | -2.38355100 | -2.65951900 |
| H  | -1.95566300 | -0.29703100 | -3.19768300 |
| H  | -3.05200500 | -0.54710000 | -1.83481800 |
| C  | 4.38301100  | -2.31450700 | 0.54731700  |
| C  | 3.71934300  | 0.05505900  | 0.51976800  |
| C  | -0.98416600 | -2.96149000 | -3.24299100 |
| H  | 1.12394900  | -3.11725700 | -2.77590100 |
| H  | 0.06357100  | -3.29571600 | -1.36587400 |
| H  | -3.10461300 | -2.51156400 | -3.36806400 |
| H  | -2.54574500 | -2.94234600 | -1.75266900 |
| C  | 5.50061900  | -2.02121700 | 1.30261100  |
| H  | 4.17746900  | -3.33959800 | 0.24909400  |
| C  | 4.88445400  | 0.33093500  | 1.27735300  |
| O  | 2.95021800  | 1.06084500  | 0.17342200  |
| H  | -0.77525800 | -2.47961700 | -4.20744400 |
| H  | -1.10318000 | -4.03102300 | -3.44555200 |
| C  | 5.74562500  | -0.68149600 | 1.65983900  |
| H  | 6.18095500  | -2.80685200 | 1.61225200  |
| H  | 5.06791500  | 1.36474200  | 1.54975700  |
| H  | 6.62420700  | -0.43601900 | 2.25006300  |
| H  | 0.52975600  | -0.68391900 | -2.89055700 |
| H  | -1.12368500 | -1.33344400 | -0.43325700 |
| O  | 0.63501500  | 0.28838000  | 1.49623800  |
| H  | 1.33368200  | 0.57453800  | 2.10005900  |
| H  | 0.16029500  | -1.28819700 | 1.45828500  |
| O  | 2.08003500  | 1.73599200  | -2.44973600 |
| H  | 1.75706900  | 2.54597000  | -2.01996200 |
| H  | 2.89806100  | 1.55971800  | -1.95884200 |
| C  | -1.33993200 | -2.16421700 | 2.34963100  |

|   |             |             |             |
|---|-------------|-------------|-------------|
| C | -2.24621600 | -0.93131400 | 2.24329800  |
| O | -0.31320600 | -2.16170000 | 1.37398600  |
| H | -0.90041900 | -2.09948400 | 3.36156500  |
| H | -1.62868300 | -0.03889700 | 2.13007200  |
| H | -2.88798600 | -0.85311300 | 3.12240300  |
| C | -2.09671900 | -3.48045200 | 2.23065700  |
| H | -1.40947000 | -4.31633800 | 2.38372400  |
| H | -2.90976400 | -3.53943000 | 2.95821800  |
| H | -2.52253300 | -3.57436200 | 1.22650000  |
| C | -5.12953500 | -1.36363600 | -0.06775500 |
| H | -6.16517700 | -1.64923200 | 0.11205300  |
| H | -4.66548000 | -2.07155100 | -0.76023300 |
| H | -5.09450600 | -0.37390900 | -0.53251600 |
| C | -4.37931500 | -1.35400000 | 1.24384800  |
| O | -3.09459700 | -0.97130800 | 1.06194800  |
| O | -4.86508800 | -1.64632700 | 2.31438000  |

six-coordinated H<sub>2</sub>O-Co<sup>III</sup>-OAc counterion addition in the middle carbon and subsequent hydrolysis

**H<sub>2</sub>O-Co<sup>III</sup>-OAc counterion addition in the middle carbon**

H<sub>2</sub>O-Co<sup>III</sup>-OAc + PO = H<sub>2</sub>O-Co<sup>III</sup>-PO-OAc

Charge: 0

Spin Multiplicity: 1

Sum of electronic and thermal Free Energies (a.u.): -1677.013526

Thermal correction to Gibbs Free Energy (a.u.): 0.466680

Imaginary frequencies: -253.07

Calculation of single point energy based on the optimized structure, Et = -2915.8191341 a.u.

|    |             |             |             |
|----|-------------|-------------|-------------|
| C  | 3.84038000  | -3.79947100 | -0.68123800 |
| C  | 4.69615700  | -2.69347800 | -0.82881700 |
| C  | 2.46751700  | -3.63682600 | -0.60870300 |
| H  | 4.26015100  | -4.79955800 | -0.61580300 |
| C  | 4.14041400  | -1.43039100 | -0.90370600 |
| H  | 5.77091900  | -2.82932600 | -0.87653800 |
| C  | 1.87526800  | -2.35121000 | -0.67982900 |
| H  | 1.80342000  | -4.48521400 | -0.48029300 |
| C  | 2.74388800  | -1.23038100 | -0.84181800 |
| H  | 4.77967600  | -0.55716400 | -1.00620600 |
| O  | 0.56825700  | -2.26559000 | -0.57464400 |
| C  | 2.25315800  | 0.11973500  | -0.90020300 |
| Co | -0.47455700 | -0.68653300 | -0.70513800 |
| N  | 1.01506500  | 0.46839200  | -0.93827400 |
| H  | 3.01089900  | 0.89921100  | -0.90699400 |
| N  | -1.54986600 | 0.86530600  | -1.00304700 |
| C  | 0.60005900  | 1.87236800  | -0.82594600 |
| C  | -2.75577300 | 1.00103400  | -0.56828200 |
| C  | -0.75044900 | 1.96808100  | -1.55078300 |
| C  | 1.59890700  | 2.91258200  | -1.32748900 |
| H  | -3.23020800 | 1.98009300  | -0.64063600 |
| C  | -3.55182900 | -0.04472700 | 0.01042900  |
| C  | -1.34841400 | 3.36886400  | -1.44034600 |
| C  | 0.98945500  | 4.31927900  | -1.24572600 |
| H  | 1.88505600  | 2.68435500  | -2.36364400 |
| H  | 2.49875100  | 2.87369800  | -0.70854600 |
| C  | -4.80279000 | 0.29640600  | 0.56950600  |
| C  | -3.13076300 | -1.40999900 | -0.01131600 |
| C  | -0.35237400 | 4.40506100  | -1.98090400 |
| H  | -2.29214300 | 3.42929900  | -1.99406600 |
| H  | -1.56879600 | 3.58633100  | -0.38710900 |
| H  | 1.69477000  | 5.05137500  | -1.65265400 |
| H  | 0.83950200  | 4.58063200  | -0.19064700 |
| C  | -5.63320900 | -0.66334600 | 1.11651800  |
| H  | -5.10214400 | 1.34184300  | 0.56902600  |
| C  | -4.00293200 | -2.37488000 | 0.54628900  |
| O  | -2.00165000 | -1.81388300 | -0.54716400 |
| H  | -0.19563400 | 4.23121900  | -3.05409400 |
| H  | -0.77747200 | 5.40955400  | -1.88426900 |
| C  | -5.21956500 | -2.00761400 | 1.09598500  |
| H  | -6.58685600 | -0.38654300 | 1.55227700  |
| H  | -3.67927100 | -3.41018300 | 0.52845200  |
| H  | -5.86254600 | -2.77310200 | 1.52174300  |

|   |             |             |             |
|---|-------------|-------------|-------------|
| C | 0.69516700  | -0.64259200 | 2.67091300  |
| C | -0.51612400 | -1.23924300 | 2.07082500  |
| O | -0.50884400 | -0.21864400 | 1.08928100  |
| H | 0.60663800  | 0.27030900  | 3.27056500  |
| H | -1.42452800 | -1.20996200 | 2.68615200  |
| H | -0.36970400 | -2.24016900 | 1.65325000  |
| C | 1.98751900  | -1.34418300 | 2.64159700  |
| H | 2.18529100  | -1.81625100 | 1.67832900  |
| H | 2.81360100  | -0.69481800 | 2.91816100  |
| H | 1.88515400  | -2.17314900 | 3.36614000  |
| H | -0.58047600 | 1.73187800  | -2.61108400 |
| H | 0.44046200  | 2.02320500  | 0.24804100  |
| C | 2.59552800  | 3.49321800  | 2.39732400  |
| H | 2.86395000  | 3.96938500  | 3.34281400  |
| H | 1.91285200  | 4.16744800  | 1.86587600  |
| H | 3.48451500  | 3.35434800  | 1.77616400  |
| C | 1.88049600  | 2.15576600  | 2.65518900  |
| O | 1.98441500  | 1.28450100  | 1.72316100  |
| O | 1.23749200  | 2.02753800  | 3.71761400  |
| O | -0.62865900 | -1.22207400 | -2.67369100 |
| H | -1.50210600 | -1.63248800 | -2.51745900 |
| H | -0.01329000 | -1.97486000 | -2.61224300 |

**H<sub>2</sub>O-Co<sup>III</sup>-OAc counterion addition in the middle carbon**

H<sub>2</sub>O-Co<sup>III</sup>-OAc + PO = H<sub>2</sub>O-Co<sup>III</sup>-PO-OAc

Charge: 0

Spin Multiplicity: 1

Sum of electronic and thermal Free Energies (a.u.): -1677.044167

Thermal correction to Gibbs Free Energy (a.u.): 0.468696

No imaginary frequency

Calculation of single point energy based on the optimized structure, Er = -2915.8510919 a.u.

|    |             |             |             |
|----|-------------|-------------|-------------|
| C  | 3.13617500  | -4.47125100 | -0.42825400 |
| C  | 4.15912300  | -3.53948200 | -0.67074800 |
| C  | 1.81614900  | -4.06785600 | -0.30518900 |
| H  | 3.37977000  | -5.52543300 | -0.32835100 |
| C  | 3.82719200  | -2.20216500 | -0.78895900 |
| H  | 5.19086500  | -3.86229000 | -0.75580300 |
| C  | 1.45673000  | -2.70477700 | -0.41910300 |
| H  | 1.02351100  | -4.78058800 | -0.10238900 |
| C  | 2.49110800  | -1.76092800 | -0.68086200 |
| H  | 4.59957400  | -1.45746200 | -0.96000400 |
| O  | 0.18502900  | -2.38620200 | -0.25560300 |
| C  | 2.23583100  | -0.34938900 | -0.80278800 |
| Co | -0.58066600 | -0.69932300 | -0.57448300 |
| N  | 1.06764600  | 0.19813400  | -0.83032800 |
| H  | 3.10396100  | 0.29857700  | -0.85574500 |
| N  | -1.40126900 | 0.98712600  | -0.96766100 |
| C  | 0.89290400  | 1.65662600  | -0.82054100 |
| C  | -2.58919100 | 1.31736500  | -0.59506300 |
| C  | -0.43289300 | 1.93713000  | -1.53651300 |
| C  | 2.02755700  | 2.48025300  | -1.42787100 |
| H  | -2.90306000 | 2.35348400  | -0.72079100 |
| C  | -3.56294700 | 0.42715500  | -0.02168700 |
| C  | -0.80362300 | 3.41661100  | -1.44249700 |
| C  | 1.66748500  | 3.96867600  | -1.32098500 |
| H  | 2.18600800  | 2.19390300  | -2.47846400 |
| H  | 2.93986100  | 2.29234500  | -0.85981700 |
| C  | -4.76805700 | 0.97574200  | 0.46758900  |
| C  | -3.35872000 | -0.98467900 | 0.01706300  |
| C  | 0.33404600  | 4.28024600  | -2.00902900 |
| H  | -1.73221800 | 3.62001400  | -1.98885400 |
| H  | -0.96935600 | 3.67378600  | -0.38879300 |
| H  | 2.46761200  | 4.57830400  | -1.75419200 |
| H  | 1.60207400  | 4.22596100  | -0.25698300 |
| C  | -5.76008500 | 0.17351000  | 1.00071500  |
| H  | -4.90208700 | 2.05377800  | 0.42237100  |
| C  | -4.39135500 | -1.78606300 | 0.55624000  |
| O  | -2.27315400 | -1.57423200 | -0.43875100 |
| H  | 0.42452800  | 4.09362200  | -3.08810800 |
| H  | 0.07724300  | 5.33882800  | -1.89401000 |

|   |             |             |             |
|---|-------------|-------------|-------------|
| C | -5.56029700 | -1.21769700 | 1.03602700  |
| H | -6.67755800 | 0.60846600  | 1.38136500  |
| H | -4.23109200 | -2.85869400 | 0.58234800  |
| H | -6.33229900 | -1.86059600 | 1.44965000  |
| C | 0.15730100  | -0.26947400 | 2.49710000  |
| C | -1.11904500 | -0.99283500 | 2.35741500  |
| O | -0.66853100 | -0.14911600 | 1.26525400  |
| H | 0.17136100  | 0.70868000  | 2.96826800  |
| H | -2.03833000 | -0.63206400 | 2.80999700  |
| H | -1.08127200 | -2.05275200 | 2.12081400  |
| C | 1.47567000  | -0.97360300 | 2.45838200  |
| H | 1.40190400  | -1.95959800 | 2.00130600  |
| H | 2.22008800  | -0.35428600 | 1.94849700  |
| H | 1.80304600  | -1.09695600 | 3.49772400  |
| H | -0.31901500 | 1.65640700  | -2.59424700 |
| H | 0.81515300  | 1.93762600  | 0.24888900  |
| C | 3.53591600  | 3.06514600  | 2.91695100  |
| H | 2.95330900  | 3.50835800  | 3.72777800  |
| H | 3.99295700  | 3.87619200  | 2.33733400  |
| H | 4.35087000  | 2.45725600  | 3.31960000  |
| C | 2.64736000  | 2.22316700  | 1.98509300  |
| O | 3.24481700  | 1.39821200  | 1.23375200  |
| O | 1.40092800  | 2.44387500  | 2.02866700  |
| O | -0.73460000 | -1.27823100 | -2.46540400 |
| H | -1.64565400 | -1.61478400 | -2.33081000 |
| H | -0.18032700 | -2.07819500 | -2.43983100 |

**H<sub>2</sub>O-Co<sup>III</sup>-OAc counterion addition in the middle carbon**

H<sub>2</sub>O-Co<sup>III</sup>-OAc + PO = H<sub>2</sub>O-Co<sup>III</sup>-PO-OAc

Charge: 0

Spin Multiplicity: 1

Sum of electronic and thermal Free Energies (a.u.): -1677.101102

Thermal correction to Gibbs Free Energy (a.u.): 0.472630

No imaginary frequency

Calculation of single point energy based on the optimized structure, E<sub>p</sub> = -2915.9031151 a.u.

|    |             |             |             |
|----|-------------|-------------|-------------|
| C  | 4.26112200  | -2.57704700 | -1.80099800 |
| C  | 4.93606400  | -1.34081700 | -1.74357800 |
| C  | 2.89988900  | -2.65999800 | -1.58227000 |
| H  | 4.82015800  | -3.48324500 | -2.01839400 |
| C  | 4.20924000  | -0.20470600 | -1.45146600 |
| H  | 6.00526300  | -1.28670800 | -1.91670500 |
| C  | 2.12335300  | -1.50444100 | -1.29460500 |
| H  | 2.37652900  | -3.60949500 | -1.62239300 |
| C  | 2.81421000  | -0.25313700 | -1.22135200 |
| H  | 4.70792600  | 0.75931000  | -1.37998300 |
| O  | 0.83656500  | -1.65070100 | -1.12985000 |
| C  | 2.15280700  | 0.95770100  | -0.82625500 |
| Co | -0.43515000 | -0.26458900 | -0.82340400 |
| N  | 0.88798400  | 1.08615600  | -0.61755400 |
| H  | 2.79883400  | 1.81989800  | -0.65817800 |
| N  | -1.70684500 | 1.15853500  | -0.67098100 |
| C  | 0.29398700  | 2.28014600  | -0.01121700 |
| C  | -2.92981500 | 0.98551600  | -0.30149200 |
| C  | -1.05799000 | 2.47487300  | -0.72195800 |
| C  | 1.14411500  | 3.54732100  | -0.01944800 |
| H  | -3.53607800 | 1.86162600  | -0.06798800 |
| C  | -3.58803700 | -0.28268000 | -0.16382600 |
| C  | -1.83649600 | 3.64605900  | -0.12394100 |
| C  | 0.34979400  | 4.71986800  | 0.57228400  |
| H  | 1.45297300  | 3.78486800  | -1.04714200 |
| H  | 2.04785800  | 3.38352000  | 0.57539100  |
| C  | -4.89596600 | -0.29972700 | 0.36898700  |
| C  | -2.97498600 | -1.50427000 | -0.58388100 |
| C  | -0.98358000 | 4.92245900  | -0.15596600 |
| H  | -2.77117200 | 3.80645900  | -0.67273700 |
| H  | -2.10157800 | 3.40795300  | 0.91436900  |
| H  | 0.95057700  | 5.63444700  | 0.52810900  |
| H  | 0.15775700  | 4.51821300  | 1.63377400  |
| C  | -5.60238700 | -1.47856500 | 0.51227300  |
| H  | -5.34161400 | 0.64419200  | 0.67503300  |

|   |             |             |             |
|---|-------------|-------------|-------------|
| C | -3.72309000 | -2.69768400 | -0.43271300 |
| O | -1.78588700 | -1.57046100 | -1.12909800 |
| H | -0.79110000 | 5.20419100  | -1.20010600 |
| H | -1.54249400 | 5.74979400  | 0.29400800  |
| C | -4.99947900 | -2.68195400 | 0.10162000  |
| H | -6.60268100 | -1.47751700 | 0.93147100  |
| H | -3.25257000 | -3.62289700 | -0.74813500 |
| H | -5.54218100 | -3.61739500 | 0.20877000  |
| C | 0.56617400  | -1.33705900 | 2.87662100  |
| C | -0.29228300 | -1.58373400 | 1.63578200  |
| O | -0.52464400 | -0.36760100 | 1.00037000  |
| H | 0.18965600  | -0.45398500 | 3.39865800  |
| H | -1.23899200 | -2.05501300 | 1.96023700  |
| H | 0.22661000  | -2.30558900 | 0.99147900  |
| C | 0.65072600  | -2.54512200 | 3.79675200  |
| H | 1.04380800  | -3.41349100 | 3.25835900  |
| H | 1.30733100  | -2.34177600 | 4.64711800  |
| H | -0.34291100 | -2.79724900 | 4.17869300  |
| H | -0.84774300 | 2.68440400  | -1.78085300 |
| H | 0.09140100  | 1.98693300  | 1.02695800  |
| C | 3.84134400  | 0.24772300  | 2.07669000  |
| H | 4.41252800  | 0.00542500  | 2.97937100  |
| H | 4.12032000  | 1.24918200  | 1.74736600  |
| H | 4.08776700  | -0.48916700 | 1.31190500  |
| C | 2.36663100  | 0.21659900  | 2.41393300  |
| O | 1.93146200  | -1.05201800 | 2.45318900  |
| O | 1.70378800  | 1.20515500  | 2.66358400  |
| O | -0.49661900 | -0.17115600 | -2.91579000 |
| H | -1.29507900 | -0.73487000 | -2.89225900 |
| H | 0.22059700  | -0.81065200 | -3.06364800 |

**H<sub>2</sub>O-Co<sup>III</sup>-OAc counterion addition in the middle carbon**

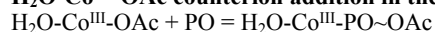

Charge: 0

Spin Multiplicity: 3

Sum of electronic and thermal Free Energies (a.u.): -1677.004728

Thermal correction to Gibbs Free Energy (a.u.): 0.460579

Imaginary frequencies: -314.32

Calculation of single point energy based on the optimized structure, Et = -2915.8077437 a.u.

|    |             |             |             |
|----|-------------|-------------|-------------|
| C  | 3.56172600  | -4.00953200 | -0.88763300 |
| C  | 4.47543200  | -2.95178900 | -1.05373000 |
| C  | 2.20761500  | -3.76811600 | -0.73913800 |
| H  | 3.92377100  | -5.03368600 | -0.86794500 |
| C  | 3.99854800  | -1.65591700 | -1.07535700 |
| H  | 5.53562400  | -3.15245300 | -1.16155800 |
| C  | 1.69758800  | -2.44591700 | -0.73987100 |
| H  | 1.49961900  | -4.57721600 | -0.59456500 |
| C  | 2.62126700  | -1.37546800 | -0.93267000 |
| H  | 4.68375200  | -0.82161400 | -1.20026000 |
| O  | 0.41106200  | -2.27686000 | -0.54446500 |
| C  | 2.19736100  | -0.00772600 | -0.97867200 |
| Co | -0.54231400 | -0.65478700 | -0.54227000 |
| N  | 0.97537300  | 0.40654400  | -0.94805500 |
| H  | 2.98894300  | 0.73268400  | -1.05488200 |
| N  | -1.56059900 | 0.93824400  | -0.91964100 |
| C  | 0.64397500  | 1.83576200  | -0.85113500 |
| C  | -2.77566800 | 1.12728200  | -0.52937700 |
| C  | -0.72683000 | 1.98677500  | -1.52352500 |
| C  | 1.67219800  | 2.80706700  | -1.42603900 |
| H  | -3.22023400 | 2.11397300  | -0.66273000 |
| C  | -3.61972800 | 0.13440400  | 0.06906700  |
| C  | -1.24919800 | 3.41847900  | -1.41987100 |
| C  | 1.14401900  | 4.24583000  | -1.33569700 |
| H  | 1.88412400  | 2.54741900  | -2.47248900 |
| H  | 2.60386300  | 2.72900300  | -0.86068200 |
| C  | -4.88881200 | 0.53292600  | 0.54723600  |
| C  | -3.23866000 | -1.24141700 | 0.13334000  |
| C  | -0.22241800 | 4.39466900  | -2.01304600 |
| H  | -2.20516500 | 3.51968600  | -1.94543300 |
| H  | -1.42471900 | 3.66196900  | -0.36383800 |

|   |             |             |             |
|---|-------------|-------------|-------------|
| H | 1.86846600  | 4.93392100  | -1.78357100 |
| H | 1.05551900  | 4.52649800  | -0.27837800 |
| C | -5.77158600 | -0.37840700 | 1.09164600  |
| H | -5.15835100 | 1.58429700  | 0.48365900  |
| C | -4.16916900 | -2.15899600 | 0.67810300  |
| O | -2.09343200 | -1.70612000 | -0.31087400 |
| H | -0.12064900 | 4.20176300  | -3.08946800 |
| H | -0.58986500 | 5.42110800  | -1.91120000 |
| C | -5.39857500 | -1.73464800 | 1.14904300  |
| H | -6.73730600 | -0.05697400 | 1.46579600  |
| H | -3.87494500 | -3.20216400 | 0.71975500  |
| H | -6.08511400 | -2.46225600 | 1.57283500  |
| C | 0.86159700  | -0.53594900 | 2.82511600  |
| C | -0.48699700 | -0.96372600 | 2.39792200  |
| O | -0.45669300 | -0.05460400 | 1.32699300  |
| H | 0.97861100  | 0.37355200  | 3.41987800  |
| H | -1.28776300 | -0.74247900 | 3.11784300  |
| H | -0.55071700 | -2.01437700 | 2.08186500  |
| C | 2.01669400  | -1.43381100 | 2.65107200  |
| H | 1.97979500  | -1.96627400 | 1.69964200  |
| H | 2.96720600  | -0.91813400 | 2.75874700  |
| H | 1.91031800  | -2.20479200 | 3.43603200  |
| H | -0.61261300 | 1.71706600  | -2.58304700 |
| H | 0.54016700  | 2.01645100  | 0.22551700  |
| C | 3.20783700  | 3.23821500  | 2.03712200  |
| H | 3.64512500  | 3.75278100  | 2.89504800  |
| H | 2.56458500  | 3.95038000  | 1.50644000  |
| H | 3.99384900  | 2.91731700  | 1.34754100  |
| C | 2.35949000  | 2.04348100  | 2.50587200  |
| O | 2.17535800  | 1.12565900  | 1.62910300  |
| O | 1.89993100  | 2.06154200  | 3.66388800  |
| O | -1.00850500 | -1.40389900 | -2.83595300 |
| H | -1.78821300 | -1.75744500 | -2.37511100 |
| H | -0.35663800 | -2.11084400 | -2.71847600 |

**H<sub>2</sub>O-Co<sup>III</sup>-OAc counterion addition in the middle carbon**

H<sub>2</sub>O-Co<sup>III</sup>-OAc + PO = H<sub>2</sub>O-Co<sup>III</sup>-PO~OAc

Charge: 0

Spin Multiplicity: 3

Sum of electronic and thermal Free Energies (a.u.): -1677.048902

Thermal correction to Gibbs Free Energy (a.u.): 0.463314

No imaginary frequency

Calculation of single point energy based on the optimized structure, Er = -2915.8521332 a.u.

|    |             |             |             |
|----|-------------|-------------|-------------|
| C  | 3.20680700  | -4.37997100 | -0.47713700 |
| C  | 4.21385600  | -3.43170600 | -0.73805700 |
| C  | 1.88475400  | -3.99631200 | -0.33966000 |
| H  | 3.47006900  | -5.42875000 | -0.37270900 |
| C  | 3.86763800  | -2.10004100 | -0.86365200 |
| H  | 5.24861700  | -3.74266400 | -0.83137700 |
| C  | 1.50949800  | -2.63662300 | -0.46221100 |
| H  | 1.10345100  | -4.71586900 | -0.11923900 |
| C  | 2.52524000  | -1.67791800 | -0.74657500 |
| H  | 4.62838500  | -1.34693600 | -1.04671600 |
| O  | 0.24601800  | -2.32386900 | -0.27790800 |
| C  | 2.23479300  | -0.28058200 | -0.87745700 |
| Co | -0.57020800 | -0.68838300 | -0.58632700 |
| N  | 1.04594800  | 0.23947900  | -0.88435900 |
| H  | 3.08337000  | 0.38681400  | -0.96091900 |
| N  | -1.42233400 | 0.98883400  | -0.93262000 |
| C  | 0.85932700  | 1.69774500  | -0.85552900 |
| C  | -2.61773100 | 1.28711900  | -0.54654900 |
| C  | -0.49228200 | 1.96940800  | -1.51797100 |
| C  | 1.96450600  | 2.54118200  | -1.48826000 |
| H  | -2.95478700 | 2.31764600  | -0.65480600 |
| C  | -3.56819500 | 0.36688500  | 0.00689200  |
| C  | -0.88222700 | 3.44047200  | -1.38383400 |
| C  | 1.58733600  | 4.02303400  | -1.34655900 |
| H  | 2.09614700  | 2.27074100  | -2.54667800 |
| H  | 2.89598500  | 2.35906900  | -0.94961100 |
| C  | -4.80020000 | 0.87064300  | 0.48115800  |

|   |             |             |             |
|---|-------------|-------------|-------------|
| C | -3.32534600 | -1.04071100 | 0.02544900  |
| C | 0.22427300  | 4.32721300  | -1.97758100 |
| H | -1.83136500 | 3.64102400  | -1.89466800 |
| H | -1.01357500 | 3.67700000  | -0.32053400 |
| H | 2.36150000  | 4.64975100  | -1.80211100 |
| H | 1.56233000  | 4.26042600  | -0.27656200 |
| C | -5.77675700 | 0.02899200  | 0.97662100  |
| H | -4.96536800 | 1.94469000  | 0.45355500  |
| C | -4.35046300 | -1.88481200 | 0.51587700  |
| O | -2.21272500 | -1.58990000 | -0.40404200 |
| H | 0.27456400  | 4.15915200  | -3.06236500 |
| H | -0.04046400 | 5.38051400  | -1.83527300 |
| C | -5.54074100 | -1.35906000 | 0.98535700  |
| H | -6.71369800 | 0.42914500  | 1.34800800  |
| H | -4.15972600 | -2.95256000 | 0.52161500  |
| H | -6.30376500 | -2.03027400 | 1.36922200  |
| C | 0.15152500  | -0.12402500 | 2.67866500  |
| C | -1.19301400 | -0.72401300 | 2.65458000  |
| O | -0.69713600 | -0.02560100 | 1.49323300  |
| H | 0.28535300  | 0.85988800  | 3.11956800  |
| H | -2.03837500 | -0.23242800 | 3.13067200  |
| H | -1.28510000 | -1.79971300 | 2.51911000  |
| C | 1.38873700  | -0.96933700 | 2.58399800  |
| H | 1.17124700  | -1.93621800 | 2.12634100  |
| H | 2.16269500  | -0.44724800 | 2.01445100  |
| H | 1.77286800  | -1.14192800 | 3.59595900  |
| H | -0.41533900 | 1.70783000  | -2.58373900 |
| H | 0.82872000  | 1.97036100  | 0.22076600  |
| C | 3.61909400  | 2.58704800  | 3.09743800  |
| H | 3.55948500  | 1.85339500  | 3.91092800  |
| H | 3.27080900  | 3.54789900  | 3.48374800  |
| H | 4.66604700  | 2.65327300  | 2.79100700  |
| C | 2.73903700  | 2.10732500  | 1.93081000  |
| O | 3.27849300  | 1.30382000  | 1.11404400  |
| O | 1.54338400  | 2.52042200  | 1.91500100  |
| O | -0.84035000 | -1.40855600 | -2.76938700 |
| H | -1.63894900 | -1.86336100 | -2.45102600 |
| H | -0.16904800 | -2.10478300 | -2.80933700 |

**H<sub>2</sub>O-Co<sup>III</sup>-OAc counterion addition in the middle carbon**

H<sub>2</sub>O-Co<sup>III</sup>-OAc + PO = H<sub>2</sub>O-Co<sup>III</sup>-PO~OAc

Charge: 0

Spin Multiplicity: 3

Sum of electronic and thermal Free Energies (a.u.): -1677.089994

Thermal correction to Gibbs Free Energy (a.u.): 0.466240

No imaginary frequency

Calculation of single point energy based on the optimized structure, Ep = -2915.8912017 a.u.

|    |             |             |             |
|----|-------------|-------------|-------------|
| C  | 4.51848200  | -1.26735700 | -2.40362800 |
| C  | 5.04369700  | -0.05943400 | -1.90568000 |
| C  | 3.17759700  | -1.57688700 | -2.26300900 |
| H  | 5.17584100  | -1.97094100 | -2.90717100 |
| C  | 4.19347100  | 0.81861200  | -1.26345700 |
| H  | 6.09617400  | 0.17403200  | -2.02277900 |
| C  | 2.28331700  | -0.69364100 | -1.60393100 |
| H  | 2.76726200  | -2.50564200 | -2.64475000 |
| C  | 2.82080700  | 0.52824100  | -1.09382900 |
| H  | 4.57513900  | 1.75528700  | -0.86417500 |
| O  | 1.02320600  | -1.03224200 | -1.51428900 |
| C  | 2.00773200  | 1.49171800  | -0.41065400 |
| Co | -0.37436000 | -0.08760500 | -0.60514700 |
| N  | 0.74243300  | 1.39296300  | -0.18448100 |
| H  | 2.52775100  | 2.38129900  | -0.05792800 |
| N  | -1.84365000 | 1.20064200  | -0.38295700 |
| C  | -0.01454000 | 2.39337900  | 0.57715300  |
| C  | -3.07527200 | 0.85778600  | -0.21827200 |
| C  | -1.34618800 | 2.56509600  | -0.18151100 |
| C  | 0.67876000  | 3.73192300  | 0.82254200  |
| H  | -3.80863100 | 1.62060500  | 0.05019400  |
| C  | -3.58738300 | -0.47728700 | -0.35273000 |
| C  | -2.28255600 | 3.53309100  | 0.54197600  |

|   |             |             |             |
|---|-------------|-------------|-------------|
| C | -0.26963900 | 4.69466000  | 1.55090900  |
| H | 0.98387700  | 4.16972000  | -0.13783800 |
| H | 1.58346700  | 3.58098900  | 1.42003600  |
| C | -4.94577000 | -0.70117600 | -0.03072700 |
| C | -2.78536300 | -1.56103500 | -0.83347400 |
| C | -1.58229700 | 4.87812900  | 0.78167800  |
| H | -3.19668500 | 3.68893600  | -0.04106500 |
| H | -2.57874900 | 3.09364500  | 1.50375100  |
| H | 0.22526000  | 5.66055600  | 1.69626200  |
| H | -0.48640000 | 4.29777300  | 2.55124700  |
| C | -5.52347900 | -1.94882500 | -0.15563900 |
| H | -5.53537400 | 0.13955900  | 0.32765100  |
| C | -3.40662100 | -2.82862200 | -0.96321600 |
| O | -1.53110900 | -1.44959700 | -1.19772300 |
| H | -1.37423700 | 5.35555700  | -0.18522000 |
| H | -2.25299100 | 5.55120600  | 1.32600300  |
| C | -4.73564600 | -3.01471000 | -0.63038000 |
| H | -6.56449400 | -2.10572200 | 0.10475500  |
| H | -2.79366300 | -3.64515200 | -1.32932500 |
| H | -5.17601700 | -4.00259800 | -0.73462500 |
| C | 0.69526500  | -2.08452100 | 2.69766300  |
| C | -0.37770900 | -1.87441300 | 1.62742900  |
| O | -0.36596500 | -0.55374800 | 1.19344600  |
| H | 0.66421200  | -1.24122700 | 3.39236600  |
| H | -1.35501200 | -2.12541100 | 2.07748300  |
| H | -0.20289900 | -2.58949500 | 0.80824700  |
| C | 0.56238700  | -3.41835600 | 3.41749100  |
| H | 0.59721000  | -4.24792700 | 2.70390000  |
| H | 1.37441600  | -3.55181300 | 4.13724600  |
| H | -0.38917100 | -3.46557200 | 3.95548200  |
| H | -1.10596400 | 2.96424400  | -1.17725700 |
| H | -0.23699500 | 1.90960700  | 1.53728400  |
| C | 4.10853500  | -1.26290800 | 1.47559300  |
| H | 4.63827300  | -1.97602000 | 2.11532200  |
| H | 4.68094100  | -0.34056300 | 1.39876500  |
| H | 4.00266600  | -1.71755100 | 0.48875900  |
| C | 2.75168000  | -0.97314100 | 2.07401900  |
| O | 2.00319400  | -2.09446900 | 2.06606900  |
| O | 2.40669600  | 0.09809000  | 2.52896800  |
| O | -0.68531300 | 0.43132800  | -3.15514900 |
| H | -1.38595900 | -0.21300400 | -2.97002200 |
| H | 0.10569700  | -0.13110800 | -3.12002700 |

#### subsequent hydrolysis

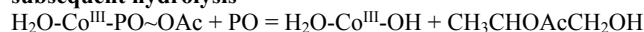

Charge: 0

Spin Multiplicity: 1

Sum of electronic and thermal Free Energies (a.u.): -1753.453263

Thermal correction to Gibbs Free Energy (a.u.): 0.494254

Imaginary frequencies: -266.50

Calculation of single point energy based on the optimized structure, Et = -2992.3174753 a.u.

|    |             |             |             |
|----|-------------|-------------|-------------|
| C  | 2.92693000  | -3.87173900 | -1.64274800 |
| C  | 3.62563000  | -2.86595800 | -2.33816200 |
| C  | 1.79744100  | -3.57753400 | -0.90257700 |
| H  | 3.27697400  | -4.89924100 | -1.69055500 |
| C  | 3.17302100  | -1.56410200 | -2.25097800 |
| H  | 4.50610800  | -3.10853500 | -2.92285500 |
| C  | 1.29555000  | -2.25180100 | -0.81316400 |
| H  | 1.25395800  | -4.34874400 | -0.36728100 |
| C  | 2.02441000  | -1.22581300 | -1.49915000 |
| H  | 3.70508400  | -0.76595500 | -2.76293800 |
| O  | 0.20529600  | -2.04761900 | -0.12007300 |
| C  | 1.68625300  | 0.16848800  | -1.35576200 |
| Co | -0.83443200 | -0.49220100 | -0.28390800 |
| N  | 0.61316300  | 0.60761900  | -0.80434600 |
| H  | 2.41855500  | 0.89011600  | -1.71639800 |
| N  | -1.89107900 | 1.09196100  | -0.46573900 |
| C  | 0.33489900  | 2.01633500  | -0.52856400 |
| C  | -3.15553600 | 1.16462300  | -0.21979400 |
| C  | -1.11815700 | 2.24268200  | -0.96720700 |



|   |             |             |             |
|---|-------------|-------------|-------------|
| C | 1.27167300  | 3.04857600  | -1.14805500 |
| H | -3.64011600 | 2.13728400  | -0.31389500 |
| C | -4.02010600 | 0.08156200  | 0.14907200  |
| C | -1.59490900 | 3.63016100  | -0.53314200 |
| C | 0.80845900  | 4.45247100  | -0.73108800 |
| H | 1.26267200  | 2.95820900  | -2.24391700 |
| H | 2.29018600  | 2.88552400  | -0.78854900 |
| C | -5.35990000 | 0.39286300  | 0.46955100  |
| C | -3.58752800 | -1.27882000 | 0.16579900  |
| C | -0.65730500 | 4.70698400  | -1.10354100 |
| H | -2.61609700 | 3.82246700  | -0.87802000 |
| H | -1.60474700 | 3.67165600  | 0.56317000  |
| H | 1.45180600  | 5.20840800  | -1.19346700 |
| H | 0.93573100  | 4.55178400  | 0.35392900  |
| C | -6.26993500 | -0.58927500 | 0.81124600  |
| H | -5.66626700 | 1.43611600  | 0.44975300  |
| C | -4.53764400 | -2.26682800 | 0.51287000  |
| O | -2.37178200 | -1.66849400 | -0.15342600 |
| H | -0.75626900 | 4.72084600  | -2.19769200 |
| H | -0.97515200 | 5.69328500  | -0.74909100 |
| C | -5.84302900 | -1.92869100 | 0.82761900  |
| H | -7.29329600 | -0.33279700 | 1.06233500  |
| H | -4.20153300 | -3.29829900 | 0.52842900  |
| H | -6.54551000 | -2.71347900 | 1.09484700  |
| C | 2.78707200  | -0.02235300 | 2.78787000  |
| C | 1.41506200  | -0.60358900 | 2.43370600  |
| O | 0.64473000  | 0.28239200  | 1.70825000  |
| H | 2.66412400  | 1.02560500  | 3.06939400  |
| H | 0.93209200  | -0.88129600 | 3.39537100  |
| H | 1.58785200  | -1.55549800 | 1.89783200  |
| C | 3.51956300  | -0.81875200 | 3.85746200  |
| H | 4.52041700  | -0.41322500 | 4.03038700  |
| H | 2.96458600  | -0.78275200 | 4.79938700  |
| H | 3.62083500  | -1.86678800 | 3.55677900  |
| H | -1.14467400 | 2.18226800  | -2.06613300 |
| H | 0.39737800  | 2.08200100  | 0.56450000  |
| O | -1.69265800 | -0.22405300 | 2.00308100  |
| H | -1.68816200 | -1.16883300 | 2.20349100  |
| H | -0.68165700 | 0.07039000  | 2.05219500  |
| C | 4.91372000  | 0.80377300  | -0.15907300 |
| H | 5.91314300  | 0.89693000  | 0.27936700  |
| H | 4.81791800  | 1.55493800  | -0.94488700 |
| H | 4.81626500  | -0.20313900 | -0.56626400 |
| C | 3.88667900  | 1.05894100  | 0.92420700  |
| O | 3.64236000  | -0.06680700 | 1.60375400  |
| O | 3.40008200  | 2.14968500  | 1.15555100  |
| O | -1.16610600 | -0.96995100 | -2.20310500 |
| H | -1.86562800 | -1.59601400 | -1.89352400 |
| H | -0.41074900 | -1.51530400 | -2.48020800 |

**subsequent hydrolysis**

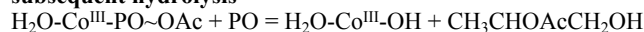

Charge: 0

Spin Multiplicity: 1

Sum of electronic and thermal Free Energies (a.u.): -1753.527157

Thermal correction to Gibbs Free Energy (a.u.): 0.495053

No imaginary frequency

Calculation of single point energy based on the optimized structure, Er = -2992.3902261 a.u.

|   |            |             |             |
|---|------------|-------------|-------------|
| C | 4.58860300 | -2.29377900 | -1.61112200 |
| C | 5.17667100 | -1.01487400 | -1.54310800 |
| C | 3.22476000 | -2.46331800 | -1.46722500 |
| H | 5.21684500 | -3.16465800 | -1.77774900 |
| C | 4.36205600 | 0.07487900  | -1.31144600 |
| H | 6.24801700 | -0.89274600 | -1.65829000 |
| C | 2.36004400 | -1.35701600 | -1.24961800 |
| H | 2.76796700 | -3.44608100 | -1.51724000 |
| C | 2.96322400 | -0.06280600 | -1.15608300 |
| H | 4.79217100 | 1.07018700  | -1.22670500 |
| O | 1.07623700 | -1.58521800 | -1.16082400 |
| C | 2.20516200 | 1.10391500  | -0.80187300 |

|    |             |             |             |
|----|-------------|-------------|-------------|
| Co | -0.29255800 | -0.27880700 | -0.95273300 |
| N  | 0.92589000  | 1.15214900  | -0.66634000 |
| H  | 2.78384600  | 2.00379300  | -0.59310900 |
| N  | -1.65734200 | 1.06152300  | -0.87633800 |
| C  | 0.22646500  | 2.29902100  | -0.08062000 |
| C  | -2.88142800 | 0.81090600  | -0.56170700 |
| C  | -1.09705100 | 2.42252600  | -0.85620200 |
| C  | 0.98966600  | 3.61890900  | -0.02687200 |
| H  | -3.54847800 | 1.64398700  | -0.34905600 |
| C  | -3.45866500 | -0.50054200 | -0.44444200 |
| C  | -1.98512400 | 3.50831600  | -0.24820900 |
| C  | 0.09196000  | 4.71090600  | 0.57274300  |
| H  | 1.31386200  | 3.90794200  | -1.03661800 |
| H  | 1.88259800  | 3.49928700  | 0.59434700  |
| C  | -4.77515300 | -0.60388400 | 0.05665000  |
| C  | -2.75093700 | -1.67880200 | -0.83458500 |
| C  | -1.22692900 | 4.84277100  | -0.19691500 |
| H  | -2.90105100 | 3.62881300  | -0.83813100 |
| H  | -2.27138600 | 3.19059300  | 0.76177100  |
| H  | 0.62652800  | 5.66680700  | 0.57994200  |
| H  | -0.12226600 | 4.45735400  | 1.61828500  |
| C  | -5.40038800 | -1.82913600 | 0.19532800  |
| H  | -5.29299400 | 0.30979000  | 0.33997100  |
| C  | -3.41795000 | -2.92013700 | -0.69415800 |
| O  | -1.54027300 | -1.66404700 | -1.33737100 |
| H  | -1.01952700 | 5.18467600  | -1.22047300 |
| H  | -1.86109100 | 5.60630900  | 0.26585700  |
| C  | -4.70577700 | -2.98994700 | -0.19107000 |
| H  | -6.40834400 | -1.89488500 | 0.59020700  |
| H  | -2.87638000 | -3.81259200 | -0.98927700 |
| H  | -5.18432800 | -3.96020800 | -0.08906100 |
| C  | 0.51446300  | -1.39398100 | 2.80858500  |
| C  | -0.26774800 | -1.64074800 | 1.51876000  |
| O  | -0.46057100 | -0.41636800 | 0.87242400  |
| H  | 0.13143900  | -0.48694100 | 3.28371300  |
| H  | -1.23465900 | -2.10891300 | 1.77774600  |
| H  | 0.28698900  | -2.35038300 | 0.89435100  |
| C  | 0.48826200  | -2.58264400 | 3.75700600  |
| H  | 1.10239700  | -2.38610000 | 4.63974300  |
| H  | -0.53627800 | -2.78060800 | 4.08525600  |
| H  | 0.87311100  | -3.48071400 | 3.26308700  |
| H  | -0.84921400 | 2.68106000  | -1.89590400 |
| H  | -0.00614300 | 1.98856400  | 0.94448100  |
| O  | -2.21739800 | 1.08089000  | 2.28238600  |
| H  | -2.97491200 | 0.48412600  | 2.31572000  |
| H  | -1.54611200 | 0.56176900  | 1.77705200  |
| C  | 3.88560400  | 0.03923400  | 2.14229800  |
| H  | 4.38554600  | -0.21354100 | 3.08346500  |
| H  | 4.22975900  | 1.01917900  | 1.81196700  |
| H  | 4.14582400  | -0.72207100 | 1.40607000  |
| C  | 2.39231600  | 0.07832700  | 2.37893300  |
| O  | 1.91350300  | -1.17455300 | 2.47323500  |
| O  | 1.74310200  | 1.09657100  | 2.50947800  |
| O  | -0.22640500 | -0.17418600 | -3.01893800 |
| H  | -0.99041500 | -0.78225800 | -3.07009000 |
| H  | 0.53772200  | -0.76272800 | -3.14221600 |

**subsequent hydrolysis**

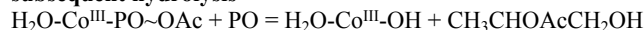

Charge: 0

Spin Multiplicity: 1

Sum of electronic and thermal Free Energies (a.u.): -1753.525719

Thermal correction to Gibbs Free Energy (a.u.): 0.496304

No imaginary frequency

Calculation of single point energy based on the optimized structure,  $E_p = -2992.3880783$  a.u.

|   |            |             |             |
|---|------------|-------------|-------------|
| C | 2.22068000 | -4.76771900 | -0.19589600 |
| C | 3.28609900 | -3.92492600 | -0.56575100 |
| C | 0.92332000 | -4.29311100 | -0.12130200 |
| H | 2.41808500 | -5.80982900 | 0.04128900  |
| C | 3.01384200 | -2.60285500 | -0.85933700 |

|    |             |             |             |
|----|-------------|-------------|-------------|
| H  | 4.29975000  | -4.30761100 | -0.61780600 |
| C  | 0.61762000  | -2.93966000 | -0.41320400 |
| H  | 0.10103500  | -4.93851300 | 0.16955600  |
| C  | 1.69851900  | -2.08866100 | -0.79407500 |
| H  | 3.81167500  | -1.92021800 | -1.13828100 |
| O  | -0.63439600 | -2.55390100 | -0.33745700 |
| C  | 1.52325800  | -0.69506700 | -1.07705500 |
| Co | -1.26471600 | -0.76865800 | -0.47598800 |
| N  | 0.39891300  | -0.05867700 | -1.06418300 |
| H  | 2.43484100  | -0.14095300 | -1.28353800 |
| N  | -1.95540900 | 0.98514700  | -0.76195200 |
| C  | 0.36567600  | 1.40743200  | -1.13572700 |
| C  | -3.01138100 | 1.45566900  | -0.18994000 |
| C  | -1.04971400 | 1.78713800  | -1.59064900 |
| C  | 1.43274600  | 2.07388700  | -2.00603400 |
| H  | -3.24368300 | 2.51492700  | -0.30897700 |
| C  | -3.94301100 | 0.68958100  | 0.58619900  |
| C  | -1.25282100 | 3.30121600  | -1.57276000 |
| C  | 1.22970100  | 3.59589300  | -2.00721200 |
| H  | 1.35792000  | 1.68115900  | -3.02896200 |
| H  | 2.43174700  | 1.83913300  | -1.63179500 |
| C  | -4.98105300 | 1.37458100  | 1.25588800  |
| C  | -3.88383700 | -0.73898600 | 0.63374200  |
| C  | -0.18754700 | 3.98470200  | -2.44330000 |
| H  | -2.25344400 | 3.56022900  | -1.93590100 |
| H  | -1.17653100 | 3.66408100  | -0.53893500 |
| H  | 1.97139900  | 4.06747200  | -2.66018700 |
| H  | 1.41507400  | 3.98159300  | -0.99509400 |
| C  | -5.94446700 | 0.69679200  | 1.97737700  |
| H  | -5.00663400 | 2.46039700  | 1.19591400  |
| C  | -4.89179100 | -1.40964600 | 1.36996400  |
| O  | -2.98181800 | -1.45210700 | 0.00615300  |
| H  | -0.33797200 | 3.69129400  | -3.49079900 |
| H  | -0.31794600 | 5.07127500  | -2.40035500 |
| C  | -5.88952200 | -0.70898100 | 2.02405500  |
| H  | -6.73074100 | 1.23554700  | 2.49481700  |
| H  | -4.84566000 | -2.49303500 | 1.40403100  |
| H  | -6.64190900 | -1.25621300 | 2.58569400  |
| C  | 3.06737200  | 2.13053200  | 1.78916900  |
| C  | 1.84454700  | 1.39475200  | 2.33466600  |
| O  | 1.68565200  | 0.19585900  | 1.63033100  |
| H  | 2.91625000  | 2.36175900  | 0.73214500  |
| H  | 0.97118400  | 2.06031100  | 2.23358900  |
| H  | 1.99723400  | 1.22127900  | 3.41436800  |
| C  | 3.43489100  | 3.37524900  | 2.57724800  |
| H  | 4.32415100  | 3.85162900  | 2.15640900  |
| H  | 2.61155100  | 4.09614200  | 2.54907100  |
| H  | 3.63853100  | 3.12581800  | 3.62295400  |
| H  | -1.17053100 | 1.42106300  | -2.62039300 |
| H  | 0.48166200  | 1.75755400  | -0.10105000 |
| O  | -0.84860400 | -0.34144200 | 1.27053200  |
| H  | -1.04368500 | -1.16832300 | 1.73535300  |
| H  | 0.71395800  | -0.02959000 | 1.53801800  |
| C  | 5.40883100  | -0.65804200 | 1.15174700  |
| H  | 5.98035200  | -0.46531500 | 2.06083700  |
| H  | 6.07046400  | -0.89890200 | 0.31882800  |
| H  | 4.74887300  | -1.51339000 | 1.33340000  |
| C  | 4.53685200  | 0.51586500  | 0.78988700  |
| O  | 4.18013600  | 1.20427100  | 1.88585300  |
| O  | 4.20170600  | 0.79062300  | -0.34907200 |
| O  | -1.86612000 | -1.38921600 | -2.35815800 |
| H  | -2.76826400 | -1.56680300 | -2.02823900 |
| H  | -1.42123600 | -2.25199600 | -2.26299300 |

**subsequent hydrolysis**

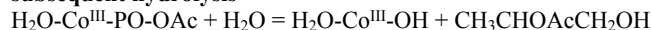

Charge: 0

Spin Multiplicity: 3

Sum of electronic and thermal Free Energies (a.u.): -1753.486600

Thermal correction to Gibbs Free Energy (a.u.): 0.485804

Imaginary frequencies: -620.64

Calculation of single point energy based on the optimized structure, Et = -2992.3453535 a.u.

|    |             |             |             |
|----|-------------|-------------|-------------|
| C  | 1.83625800  | -4.66426100 | -0.76040900 |
| C  | 2.47010000  | -4.06825600 | -1.86906200 |
| C  | 1.04628300  | -3.92414600 | 0.09809200  |
| H  | 1.96625100  | -5.72727400 | -0.57698800 |
| C  | 2.29807400  | -2.71552000 | -2.08168600 |
| H  | 3.08389000  | -4.66096500 | -2.53818100 |
| C  | 0.83696100  | -2.53400400 | -0.10176000 |
| H  | 0.55671000  | -4.38083000 | 0.95133900  |
| C  | 1.49014300  | -1.92803900 | -1.22740600 |
| H  | 2.78514200  | -2.22687800 | -2.92216700 |
| O  | 0.09205700  | -1.89237400 | 0.75738600  |
| C  | 1.43158900  | -0.51243900 | -1.45589000 |
| Co | -0.75932800 | -0.26251900 | 0.36115600  |
| N  | 0.63989600  | 0.29288900  | -0.83828800 |
| H  | 2.12879800  | -0.10091000 | -2.18751600 |
| N  | -1.59443400 | 1.36642700  | -0.20395000 |
| C  | 0.71030200  | 1.75305400  | -0.88525600 |
| C  | -2.87299700 | 1.56040000  | -0.17145300 |
| C  | -0.72834000 | 2.26329300  | -0.99684900 |
| C  | 1.58144800  | 2.41932800  | -1.94487900 |
| H  | -3.25119400 | 2.52844300  | -0.51028200 |
| C  | -3.85534000 | 0.57525600  | 0.16803500  |
| C  | -0.76354500 | 3.74926900  | -0.63513200 |
| C  | 1.56939200  | 3.93509500  | -1.67534700 |
| H  | 1.19526700  | 2.19580900  | -2.94855500 |
| H  | 2.61091000  | 2.06166600  | -1.88101100 |
| C  | -5.18803500 | 0.97823600  | 0.39921300  |
| C  | -3.53270100 | -0.81689200 | 0.09999700  |
| C  | 0.14712900  | 4.51537700  | -1.61229400 |
| H  | -1.78262900 | 4.14700300  | -0.68787500 |
| H  | -0.41848900 | 3.86667700  | 0.39871400  |
| H  | 2.14826300  | 4.45428400  | -2.44631900 |
| H  | 2.08455300  | 4.10937100  | -0.72336500 |
| C  | -6.19156400 | 0.04951400  | 0.59689300  |
| H  | -5.41218900 | 2.04172000  | 0.42718600  |
| C  | -4.58484500 | -1.74637500 | 0.27121300  |
| O  | -2.32309000 | -1.26398000 | -0.15134700 |
| H  | -0.30335800 | 4.47600100  | -2.61341300 |
| H  | 0.18624100  | 5.57261200  | -1.32924100 |
| C  | -5.87690500 | -1.32074900 | 0.52462600  |
| H  | -7.20923400 | 0.36947200  | 0.79242200  |
| H  | -4.33687700 | -2.80043900 | 0.20806800  |
| H  | -6.66177900 | -2.05846100 | 0.66664900  |
| C  | 2.83071400  | 0.69345300  | 2.46126900  |
| C  | 1.42233700  | 0.16527400  | 2.71201700  |
| O  | 0.45100800  | 0.81948600  | 1.94043600  |
| H  | 2.78138100  | 1.75710500  | 2.22258300  |
| H  | 1.21092800  | 0.31756200  | 3.78501200  |
| H  | 1.42883500  | -0.92210000 | 2.53333100  |
| C  | 3.78353400  | 0.43023200  | 3.62029400  |
| H  | 4.79501900  | 0.76435100  | 3.37295300  |
| H  | 3.45248400  | 0.97000900  | 4.51237600  |
| H  | 3.82130300  | -0.63835500 | 3.85565100  |
| H  | -1.04295700 | 2.14291800  | -2.04317100 |
| H  | 1.08253800  | 2.02695800  | 0.10840000  |
| O  | -1.67135200 | -0.12920500 | 2.23683200  |
| H  | -1.56115100 | -1.01659700 | 2.60610300  |
| H  | -0.68415000 | 0.42419800  | 2.36131700  |
| C  | 4.68228100  | -0.16403400 | -0.64971500 |
| H  | 5.70376600  | -0.29091900 | -0.27484600 |
| H  | 4.73848000  | 0.31652000  | -1.62760100 |
| H  | 4.22567400  | -1.15144300 | -0.72386700 |
| C  | 3.92999900  | 0.72345300  | 0.31547400  |
| O  | 3.38614800  | -0.00240300 | 1.30250600  |
| O  | 3.85952300  | 1.93475000  | 0.21864100  |
| O  | -1.34650400 | -1.45802700 | -2.77971700 |
| H  | -1.83676700 | -1.47556600 | -1.93845700 |

H -0.71796900 -2.18421900 -2.68258300

**subsequent hydrolysis**

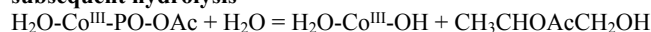

Charge: 0

Spin Multiplicity: 3

Sum of electronic and thermal Free Energies (a.u.): -1753.517272

Thermal correction to Gibbs Free Energy (a.u.): 0.488685

No imaginary frequency

Calculation of single point energy based on the optimized structure, Er = -2992.3782426 a.u.

|    |             |             |             |
|----|-------------|-------------|-------------|
| C  | 4.44975500  | -2.56158200 | -1.61624100 |
| C  | 5.03171400  | -1.29383500 | -1.82681400 |
| C  | 3.12133100  | -2.69001800 | -1.26203700 |
| H  | 5.05653100  | -3.45530200 | -1.73337800 |
| C  | 4.25086900  | -0.16992100 | -1.65932100 |
| H  | 6.07606300  | -1.20698400 | -2.10556000 |
| C  | 2.28766000  | -1.54995800 | -1.09470100 |
| H  | 2.66941400  | -3.66196900 | -1.09583600 |
| C  | 2.88633500  | -0.26343800 | -1.29536500 |
| H  | 4.68031800  | 0.81998700  | -1.79346400 |
| O  | 1.03987700  | -1.74185600 | -0.77097200 |
| C  | 2.16828700  | 0.94714800  | -1.03292400 |
| Co | -0.31658700 | -0.42786700 | -0.70629400 |
| N  | 0.91236000  | 1.02221700  | -0.74675100 |
| H  | 2.75278400  | 1.86704300  | -1.04157100 |
| N  | -1.66118000 | 0.94847600  | -0.87897000 |
| C  | 0.25264300  | 2.24900600  | -0.29148500 |
| C  | -2.90525900 | 0.74893800  | -0.61391800 |
| C  | -1.08688300 | 2.29428000  | -1.04243200 |
| C  | 1.03727100  | 3.54887600  | -0.42242000 |
| H  | -3.57007700 | 1.60756800  | -0.53933800 |
| C  | -3.51178600 | -0.53840300 | -0.41140600 |
| C  | -1.94907300 | 3.45881000  | -0.55367000 |
| C  | 0.16943900  | 4.71528900  | 0.07325500  |
| H  | 1.32522800  | 3.71435800  | -1.47028400 |
| H  | 1.95000100  | 3.48318600  | 0.17772000  |
| C  | -4.86277200 | -0.58264900 | -0.00254400 |
| C  | -2.81316900 | -1.75391700 | -0.68321300 |
| C  | -1.16916900 | 4.77719400  | -0.67179800 |
| H  | -2.86982100 | 3.52736300  | -1.14431900 |
| H  | -2.22772200 | 3.26126000  | 0.48836800  |
| H  | 0.71427000  | 5.65810800  | -0.04391200 |
| H  | -0.01696400 | 4.58559600  | 1.14642100  |
| C  | -5.52895600 | -1.78337000 | 0.15584700  |
| H  | -5.37507100 | 0.35711000  | 0.19010700  |
| C  | -3.52516000 | -2.96839900 | -0.54269400 |
| O  | -1.55982500 | -1.80312500 | -1.07672000 |
| H  | -0.98419000 | 4.99798700  | -1.73232200 |
| H  | -1.78072100 | 5.59840800  | -0.28332600 |
| C  | -4.84513400 | -2.97994600 | -0.12573200 |
| H  | -6.56293100 | -1.80329000 | 0.48256800  |
| H  | -2.99102000 | -3.88768800 | -0.75762400 |
| H  | -5.35789900 | -3.93099700 | -0.01134200 |
| C  | 0.70612300  | -0.84518400 | 3.16087800  |
| C  | -0.26798700 | -1.33717300 | 2.08716900  |
| O  | -0.57893200 | -0.31382900 | 1.19804200  |
| H  | 0.42517700  | 0.17130300  | 3.44753200  |
| H  | -1.18012800 | -1.68991300 | 2.60207900  |
| H  | 0.17861300  | -2.20375100 | 1.57789700  |
| C  | 0.78668900  | -1.77224700 | 4.36440500  |
| H  | 1.53779300  | -1.41922500 | 5.07605800  |
| H  | -0.18043900 | -1.81295000 | 4.87401500  |
| H  | 1.05743600  | -2.78683000 | 4.05439200  |
| H  | -0.86319600 | 2.41399300  | -2.11231000 |
| H  | 0.04467100  | 2.07010600  | 0.76989000  |
| O  | -2.30018700 | 1.47978800  | 2.19961800  |
| H  | -3.08054700 | 0.92950500  | 2.33648800  |
| H  | -1.62548000 | 0.83760900  | 1.85964600  |
| C  | 4.03163800  | 0.18234000  | 1.83893200  |
| H  | 4.62355200  | 0.07265900  | 2.75398600  |

|   |             |             |             |
|---|-------------|-------------|-------------|
| H | 4.38593100  | 1.05517000  | 1.29143100  |
| H | 4.16523800  | -0.71994100 | 1.24094500  |
| C | 2.58070300  | 0.37238600  | 2.22116100  |
| O | 2.04978500  | -0.80131100 | 2.59901600  |
| O | 2.00480400  | 1.44303100  | 2.22622000  |
| O | -0.23279900 | -0.68523200 | -3.18386400 |
| H | -0.91446200 | -1.32009800 | -2.89915000 |
| H | 0.57481400  | -1.21690800 | -3.20413400 |

**subsequent hydrolysis**

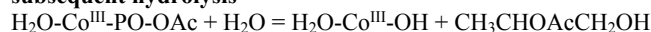

Charge: 0

Spin Multiplicity: 3

Sum of electronic and thermal Free Energies (a.u.): -1753.522526

Thermal correction to Gibbs Free Energy (a.u.): 0.492289

No imaginary frequency

Calculation of single point energy based on the optimized structure,  $E_p = -2992.3796104$  a.u.

|    |             |             |             |
|----|-------------|-------------|-------------|
| C  | -4.46489900 | 3.47109200  | 0.75280600  |
| C  | -5.16515100 | 2.34905600  | 0.27179600  |
| C  | -3.08393900 | 3.53213300  | 0.69321700  |
| H  | -5.01538800 | 4.30421200  | 1.18110400  |
| C  | -4.44878300 | 1.30080300  | -0.27256400 |
| H  | -6.24773900 | 2.31122100  | 0.32378100  |
| C  | -2.32633200 | 2.46065300  | 0.16047100  |
| H  | -2.53811600 | 4.39275800  | 1.06485100  |
| C  | -3.03744700 | 1.32823900  | -0.33722600 |
| H  | -4.96521600 | 0.42476500  | -0.65701600 |
| O  | -1.01828000 | 2.57090300  | 0.13717400  |
| C  | -2.36786500 | 0.20796100  | -0.93304000 |
| Co | 0.22348500  | 1.18793600  | -0.24587600 |
| N  | -1.09116800 | 0.04447400  | -1.01682200 |
| H  | -3.01117600 | -0.57185500 | -1.33376600 |
| N  | 1.48740500  | 0.11698800  | -1.24859900 |
| C  | -0.48954300 | -1.17730800 | -1.57634200 |
| C  | 2.73690500  | 0.01980800  | -0.94192400 |
| C  | 0.82375300  | -0.73964100 | -2.23987300 |
| C  | -1.36285300 | -1.99621700 | -2.52271200 |
| H  | 3.34057300  | -0.74130600 | -1.43514500 |
| C  | 3.42298400  | 0.85165900  | 0.00376800  |
| C  | 1.61426900  | -1.95308600 | -2.72593400 |
| C  | -0.56844500 | -3.20555800 | -3.03815500 |
| H  | -1.69125900 | -1.36991000 | -3.36380100 |
| H  | -2.24906700 | -2.34995500 | -1.99064900 |
| C  | 4.77016400  | 0.55013600  | 0.30597500  |
| C  | 2.80669600  | 2.00452800  | 0.58371900  |
| C  | 0.75451400  | -2.78574800 | -3.68830100 |
| H  | 2.53419700  | -1.63717700 | -3.23065300 |
| H  | 1.89532700  | -2.55319600 | -1.85209500 |
| H  | -1.17895500 | -3.77281000 | -3.74876500 |
| H  | -0.36087300 | -3.87556300 | -2.19397200 |
| C  | 5.51255200  | 1.34217800  | 1.15917900  |
| H  | 5.21480800  | -0.33198800 | -0.14795500 |
| C  | 3.59619700  | 2.81184400  | 1.43944700  |
| O  | 1.56971400  | 2.37463400  | 0.34622700  |
| H  | 0.54611400  | -2.19540300 | -4.59093100 |
| H  | 1.31571000  | -3.66824100 | -4.01377900 |
| C  | 4.91044100  | 2.48432500  | 1.72021900  |
| H  | 6.54227300  | 1.09263700  | 1.39044100  |
| H  | 3.12595900  | 3.68964300  | 1.86961500  |
| H  | 5.48426800  | 3.11931600  | 2.38965900  |
| C  | -0.22918500 | -3.68299300 | 1.89831900  |
| C  | 1.20854400  | -3.17490700 | 1.78709000  |
| O  | 1.37633400  | -2.17573200 | 0.81339300  |
| H  | -0.61780600 | -3.90510900 | 0.90173800  |
| H  | 1.84654300  | -4.02307200 | 1.50686500  |
| H  | 1.53324300  | -2.83696100 | 2.78458600  |
| C  | -0.36801000 | -4.88361000 | 2.82267400  |
| H  | -1.41500300 | -5.18807900 | 2.90015500  |
| H  | 0.20927300  | -5.73047000 | 2.43859200  |
| H  | -0.00498000 | -4.64432300 | 3.82727100  |

|   |             |             |             |
|---|-------------|-------------|-------------|
| H | 0.57779200  | -0.08764400 | -3.08977300 |
| H | -0.21674100 | -1.79786600 | -0.71700700 |
| O | 0.25010100  | 0.13840100  | 1.36122900  |
| H | 0.65395200  | 0.68636000  | 2.04797300  |
| H | 0.96396800  | -1.31831600 | 1.12510200  |
| C | -2.58845700 | -0.86134300 | 2.41505800  |
| H | -2.70014200 | -1.05949000 | 3.48309300  |
| H | -3.54399200 | -0.59536300 | 1.96495000  |
| H | -1.87600200 | -0.03994800 | 2.28404900  |
| C | -1.99017500 | -2.04516900 | 1.70853800  |
| O | -1.02381800 | -2.60695000 | 2.45991200  |
| O | -2.30810300 | -2.43542000 | 0.59866100  |
| O | 0.42181100  | 2.82658300  | -2.20847200 |
| H | 1.20121600  | 3.06338400  | -1.68142300 |
| H | -0.29819800 | 3.21285100  | -1.68270700 |

six-coordinated H<sub>2</sub>O-Co<sup>III</sup>-OTs counterion addition in the terminal carbon and subsequent hydrolysis

**H<sub>2</sub>O-Co<sup>III</sup>-OTs counterion addition in the terminal carbon**

H<sub>2</sub>O-Co<sup>III</sup>-OTs + PO = H<sub>2</sub>O-Co<sup>III</sup>-PO-OTs

Charge: 0

Spin Multiplicity: 1

Sum of electronic and thermal Free Energies (a.u.): -2343.280589

Thermal correction to Gibbs Free Energy (a.u.): 0.541819

Imaginary frequencies: -383.18

Calculation of single point energy based on the optimized structure, Et = -3582.3422174 a.u.

|    |             |             |             |
|----|-------------|-------------|-------------|
| C  | -0.41800400 | 5.63122400  | -0.43659100 |
| C  | 0.76421300  | 5.45188600  | 0.30363800  |
| C  | -1.33894400 | 4.60670400  | -0.57254500 |
| H  | -0.61271000 | 6.58668000  | -0.91599100 |
| C  | 0.99475300  | 4.22660000  | 0.89954000  |
| H  | 1.48359100  | 6.25766900  | 0.39885700  |
| C  | -1.12535600 | 3.34277300  | 0.03113500  |
| H  | -2.24910700 | 4.73661300  | -1.14877400 |
| C  | 0.07232700  | 3.16262100  | 0.78665700  |
| H  | 1.90614100  | 4.05795900  | 1.46766200  |
| O  | -2.03584700 | 2.41055100  | -0.14128100 |
| C  | 0.40559200  | 1.91062400  | 1.41275700  |
| Co | -1.98865300 | 0.63610000  | 0.53321500  |
| N  | -0.33255500 | 0.85691000  | 1.43820800  |
| H  | 1.38478900  | 1.86609400  | 1.88573100  |
| N  | -2.03348700 | -1.10202200 | 1.31904200  |
| C  | 0.17269800  | -0.43865500 | 1.90733800  |
| C  | -2.67531100 | -2.09888400 | 0.81348800  |
| C  | -1.04311500 | -1.23363900 | 2.39863900  |
| C  | 1.30214100  | -0.40344200 | 2.93334200  |
| H  | -2.49895000 | -3.09366900 | 1.22203300  |
| C  | -3.62941200 | -2.01480000 | -0.25744900 |
| C  | -0.64023800 | -2.65905700 | 2.77399400  |
| C  | 1.68776800  | -1.83794500 | 3.32340000  |
| H  | 0.99336700  | 0.16951200  | 3.81941700  |
| H  | 2.17571600  | 0.09393500  | 2.50084000  |
| C  | -4.13489100 | -3.21505100 | -0.80124200 |
| C  | -4.10227900 | -0.75893100 | -0.74545500 |
| C  | 0.47603300  | -2.62891400 | 3.82810900  |
| H  | -1.50329100 | -3.21595500 | 3.15649900  |
| H  | -0.27556000 | -3.17067800 | 1.87498000  |
| H  | 2.47328200  | -1.81656600 | 4.08664300  |
| H  | 2.09742400  | -2.33597200 | 2.43726800  |
| C  | -5.07812700 | -3.20686400 | -1.81200800 |
| H  | -3.75747700 | -4.15812000 | -0.41357400 |
| C  | -5.08158100 | -0.77595800 | -1.76601200 |
| O  | -3.69325300 | 0.40076700  | -0.28125400 |
| H  | 0.09408000  | -2.17425300 | 4.75276800  |
| H  | 0.76855900  | -3.65390500 | 4.07887600  |
| C  | -5.55188900 | -1.97065100 | -2.28606700 |
| H  | -5.44857700 | -4.13627400 | -2.23010800 |
| H  | -5.43827400 | 0.18055000  | -2.13308700 |
| H  | -6.29540600 | -1.94885100 | -3.07808200 |
| C  | -1.26285000 | 0.39257500  | -2.18818500 |

|   |             |             |             |
|---|-------------|-------------|-------------|
| C | 0.08724900  | 0.97135200  | -2.13360000 |
| O | -1.08667800 | -0.14918800 | -0.88373200 |
| H | -2.05547100 | 1.14905600  | -2.21227000 |
| H | 0.24748000  | 1.90307600  | -1.61010100 |
| H | 0.88710000  | 0.57257900  | -2.74269500 |
| C | -1.47755100 | -0.71070200 | -3.20792100 |
| H | -2.43226200 | -1.20762500 | -3.02164100 |
| H | -1.49620000 | -0.28776100 | -4.21930700 |
| H | -0.66453000 | -1.43761500 | -3.14124300 |
| H | -1.46815300 | -0.72479400 | 3.27601800  |
| H | 0.54264600  | -0.94616000 | 1.01140500  |
| O | 1.80437300  | -2.16199800 | -0.12098600 |
| O | 1.68862400  | 0.26443500  | -0.70724500 |
| S | 2.19448000  | -1.12102500 | -1.10336800 |
| O | 1.89828000  | -1.41390600 | -2.52623600 |
| C | 3.97589800  | -0.95748300 | -0.96267500 |
| C | 4.73020000  | -0.61545300 | -2.08326300 |
| C | 4.58756500  | -1.12154900 | 0.28005700  |
| C | 6.10573400  | -0.43419400 | -1.95323100 |
| H | 4.23543300  | -0.50959500 | -3.04220700 |
| C | 5.96252000  | -0.93477800 | 0.39702800  |
| H | 3.98840200  | -1.40745200 | 1.13738200  |
| C | 6.74234900  | -0.58934400 | -0.71517400 |
| H | 6.69654500  | -0.17122900 | -2.82692100 |
| H | 6.44157200  | -1.06380600 | 1.36434200  |
| C | 8.23668800  | -0.42446200 | -0.58839800 |
| H | 8.51609700  | -0.06008700 | 0.40465800  |
| H | 8.75279700  | -1.38037100 | -0.74158900 |
| H | 8.62572900  | 0.27789500  | -1.33131000 |
| O | -3.12790700 | 1.41276100  | 2.04256900  |
| H | -3.95065900 | 1.09043300  | 1.62443200  |
| H | -3.06569100 | 2.33519000  | 1.73490400  |

### H<sub>2</sub>O-Co<sup>III</sup>-OTs counterion addition in the terminal carbon

H<sub>2</sub>O-Co<sup>III</sup>-OTs + PO = H<sub>2</sub>O-Co<sup>III</sup>-PO-OTs

Charge: 0

Spin Multiplicity: 1

Sum of electronic and thermal Free Energies (a.u.): -2343.326522

Thermal correction to Gibbs Free Energy (a.u.): 0.542683

No imaginary frequency

Calculation of single point energy based on the optimized structure, Er = -3582.3903107 a.u.

|    |             |             |             |
|----|-------------|-------------|-------------|
| C  | -6.07181000 | 1.65301400  | -2.47050200 |
| C  | -5.63122000 | 2.97061600  | -2.24530700 |
| C  | -5.40409000 | 0.57175800  | -1.92401500 |
| H  | -6.95039300 | 1.47820500  | -3.08520400 |
| C  | -4.50883700 | 3.17065800  | -1.46693600 |
| H  | -6.16051800 | 3.81118300  | -2.67994600 |
| C  | -4.25321300 | 0.75045400  | -1.11676800 |
| H  | -5.73878700 | -0.44586100 | -2.09579500 |
| C  | -3.80310100 | 2.08807400  | -0.89142200 |
| H  | -4.14260500 | 4.17814000  | -1.28502900 |
| O  | -3.67443400 | -0.31981400 | -0.61891500 |
| C  | -2.62137700 | 2.38517500  | -0.12818000 |
| Co | -2.17206200 | -0.35885100 | 0.54387600  |
| N  | -1.86419900 | 1.52502500  | 0.46349100  |
| H  | -2.33982200 | 3.43728200  | -0.07811400 |
| N  | -0.71233800 | -0.40064900 | 1.75335400  |
| C  | -0.58589900 | 1.88481800  | 1.10240000  |
| C  | 0.10374300  | -1.39775000 | 1.82220000  |
| C  | -0.42502900 | 0.93327100  | 2.29804500  |
| C  | -0.40610300 | 3.34425100  | 1.51006700  |
| H  | 1.04944200  | -1.26746200 | 2.33528000  |
| C  | -0.16462900 | -2.69986000 | 1.26906300  |
| C  | 0.93654800  | 1.10873600  | 2.96899900  |
| C  | 0.96944700  | 3.51282700  | 2.17541500  |
| H  | -1.20884600 | 3.64653200  | 2.19849400  |
| H  | -0.46072200 | 3.99564700  | 0.63112600  |
| C  | 0.88357200  | -3.63960300 | 1.22519700  |
| C  | -1.46787000 | -3.06374800 | 0.82671300  |
| C  | 1.12706600  | 2.57605700  | 3.37869100  |



|   |             |             |             |
|---|-------------|-------------|-------------|
| H | 1.00323300  | 0.45889700  | 3.84947100  |
| H | 1.72053200  | 0.80886100  | 2.26694200  |
| H | 1.10507300  | 4.55573900  | 2.48137400  |
| H | 1.73976100  | 3.27799800  | 1.43254600  |
| C | 0.65856600  | -4.93494200 | 0.79084000  |
| H | 1.87806500  | -3.30676600 | 1.50469200  |
| C | -1.68520700 | -4.39821800 | 0.42629700  |
| O | -2.48183400 | -2.21037400 | 0.78419200  |
| H | 0.39449600  | 2.84475600  | 4.15322000  |
| H | 2.11821000  | 2.70155300  | 3.82688800  |
| C | -0.63998200 | -5.31191200 | 0.41207000  |
| H | 1.47343400  | -5.64902500 | 0.74470700  |
| H | -2.68486600 | -4.67590800 | 0.10901600  |
| H | -0.83055700 | -6.32988400 | 0.08327300  |
| C | -1.24393400 | -1.38626500 | -2.09732900 |
| C | -0.82874800 | 0.02565300  | -2.12361200 |
| O | -0.90272400 | -0.67943200 | -0.84364800 |
| H | -2.31375000 | -1.57160200 | -2.14546000 |
| H | -1.58832700 | 0.79081800  | -2.24707500 |
| H | 0.20400400  | 0.27322700  | -2.35372000 |
| C | -0.30852600 | -2.50462000 | -2.44507700 |
| H | -0.56187000 | -3.40454300 | -1.88025200 |
| H | -0.41356200 | -2.72738400 | -3.51336900 |
| H | 0.72126200  | -2.20777600 | -2.23658900 |
| H | -1.22528600 | 1.15349100  | 3.01968300  |
| H | 0.20909800  | 1.62450000  | 0.38799600  |
| O | 2.52522000  | -0.74665500 | 0.65235600  |
| O | 1.99058200  | 1.43622000  | -0.42089000 |
| S | 2.62040800  | 0.08740600  | -0.58401600 |
| O | 2.19137600  | -0.61666900 | -1.82446700 |
| C | 4.37291400  | 0.41573200  | -0.80115700 |
| C | 5.12988900  | -0.39217400 | -1.64705300 |
| C | 4.97875300  | 1.44946000  | -0.08672000 |
| C | 6.49977500  | -0.16482600 | -1.77122000 |
| H | 4.63385600  | -1.17427500 | -2.21071800 |
| C | 6.34762600  | 1.66705200  | -0.21853100 |
| H | 4.37074000  | 2.08531000  | 0.54739200  |
| C | 7.13030800  | 0.86121900  | -1.05710400 |
| H | 7.08897500  | -0.78996400 | -2.43761300 |
| H | 6.81827800  | 2.47850700  | 0.33136200  |
| C | 8.61859100  | 1.08363200  | -1.17058100 |
| H | 8.87251900  | 2.14469300  | -1.08478100 |
| H | 9.15925900  | 0.55539700  | -0.37514000 |
| H | 9.00578800  | 0.71763300  | -2.12595800 |
| O | -3.48714100 | -0.24310400 | 2.03358100  |
| H | -3.42242000 | -1.20770000 | 2.20306500  |
| H | -4.30048800 | -0.15300200 | 1.50537000  |

**H<sub>2</sub>O-Co<sup>III</sup>-OTs counterion addition in the terminal carbon**

H<sub>2</sub>O-Co<sup>III</sup>-OTs + PO = H<sub>2</sub>O-Co<sup>III</sup>-PO-OTs

Charge: 0

Spin Multiplicity: 1

Sum of electronic and thermal Free Energies (a.u.): -2343.342483

Thermal correction to Gibbs Free Energy (a.u.): 0.545307

No imaginary frequency

Calculation of single point energy based on the optimized structure, Ep = -3582.4009875 a.u.

|    |             |             |             |
|----|-------------|-------------|-------------|
| C  | -2.30822700 | 4.12222500  | -1.76414600 |
| C  | -3.27485600 | 3.13783500  | -2.04437500 |
| C  | -1.01743400 | 3.77644200  | -1.40769400 |
| H  | -2.57772900 | 5.17319200  | -1.82704600 |
| C  | -2.91198700 | 1.80843800  | -1.94554800 |
| H  | -4.28413600 | 3.41862600  | -2.32575900 |
| C  | -0.61440700 | 2.41757600  | -1.31132100 |
| H  | -0.26927000 | 4.53183000  | -1.19051800 |
| C  | -1.60370800 | 1.42082400  | -1.58279600 |
| H  | -3.64409000 | 1.02702400  | -2.13056700 |
| O  | 0.62555300  | 2.16306300  | -0.98135500 |
| C  | -1.34066700 | 0.02035200  | -1.40817300 |
| Co | 1.44394300  | 0.44729600  | -0.89824400 |
| N  | -0.19520000 | -0.49551500 | -1.12507200 |

|   |             |             |             |
|---|-------------|-------------|-------------|
| H | -2.20578000 | -0.63748000 | -1.49367100 |
| N | 2.27944000  | -1.27507100 | -0.96755200 |
| C | -0.01898900 | -1.91140700 | -0.78931300 |
| C | 3.43033800  | -1.52629900 | -0.44423700 |
| C | 1.33953300  | -2.31889800 | -1.39045300 |
| C | -1.13229500 | -2.86019800 | -1.22891300 |
| H | 3.75250100  | -2.56451700 | -0.35663700 |
| C | 4.35066700  | -0.54222500 | 0.05177900  |
| C | 1.69902700  | -3.75653800 | -1.01542700 |
| C | -0.77101700 | -4.30300400 | -0.85128900 |
| H | -1.27697800 | -2.78135200 | -2.31553300 |
| H | -2.07620400 | -2.58189300 | -0.75202100 |
| C | 5.50541000  | -0.99046600 | 0.72903400  |
| C | 4.14260500  | 0.85758200  | -0.15053200 |
| C | 0.58025000  | -4.71631400 | -1.44553400 |
| H | 2.64377200  | -4.05147800 | -1.48540300 |
| H | 1.83899600  | -3.81839500 | 0.07149300  |
| H | -1.55902000 | -4.98480700 | -1.18889100 |
| H | -0.72750700 | -4.38390200 | 0.24264100  |
| C | 6.44290600  | -0.10277300 | 1.22293800  |
| H | 5.64208400  | -2.06083100 | 0.86587300  |
| C | 5.12231200  | 1.74505500  | 0.35594400  |
| O | 3.11793700  | 1.35169500  | -0.80211300 |
| H | 0.50891500  | -4.72191900 | -2.54160600 |
| H | 0.83467500  | -5.73744400 | -1.14250200 |
| C | 6.23894700  | 1.27498300  | 1.02583700  |
| H | 7.31959000  | -0.46068800 | 1.75168500  |
| H | 4.95833000  | 2.80669400  | 0.20436500  |
| H | 6.96655300  | 1.98511900  | 1.40955700  |
| C | 1.36086000  | 1.20435300  | 1.81097600  |
| C | -0.02836500 | 1.87911500  | 1.96178600  |
| O | 1.34974600  | 0.15024200  | 0.90651400  |
| H | 2.05166800  | 2.00359000  | 1.49458000  |
| H | -0.11667500 | 2.74443900  | 1.30824500  |
| H | -0.24274200 | 2.17466100  | 2.99299600  |
| C | 1.86543800  | 0.63202800  | 3.14194300  |
| H | 2.87566000  | 0.23837100  | 3.00346000  |
| H | 1.88934900  | 1.40290300  | 3.92060000  |
| H | 1.21799800  | -0.18561800 | 3.47103700  |
| H | 1.25140900  | -2.24103600 | -2.48391000 |
| H | 0.07637800  | -1.93342000 | 0.30395200  |
| O | -0.98780900 | -1.37577500 | 2.38033900  |
| O | -1.10657300 | 1.02224900  | 1.48952600  |
| S | -1.72866800 | -0.11367700 | 2.45633200  |
| O | -1.98232100 | 0.47759300  | 3.77211500  |
| C | -3.23727700 | -0.32356100 | 1.52843200  |
| C | -3.96941800 | 0.78703700  | 1.10877200  |
| C | -3.66896200 | -1.61910100 | 1.24903000  |
| C | -5.14295400 | 0.58768000  | 0.38886500  |
| H | -3.60366900 | 1.78704300  | 1.30641500  |
| C | -4.84728000 | -1.80008500 | 0.52674700  |
| H | -3.07499900 | -2.46236100 | 1.58209500  |
| C | -5.60047900 | -0.70335300 | 0.08732700  |
| H | -5.70361200 | 1.44984600  | 0.03976900  |
| H | -5.18526700 | -2.80699300 | 0.29842600  |
| C | -6.88608300 | -0.90315000 | -0.67477000 |
| H | -6.90520900 | -1.87188400 | -1.18129000 |
| H | -7.74863700 | -0.86878400 | 0.00160000  |
| H | -7.03125100 | -0.12032400 | -1.42500200 |
| O | 1.77225100  | 0.74609900  | -2.95171800 |
| H | 2.67788600  | 1.04200800  | -2.73126100 |
| H | 1.27594400  | 1.57948500  | -3.01332600 |

**subsequent hydrolysis**

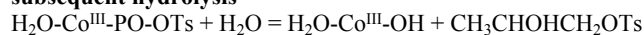

Charge: 0

Spin Multiplicity: 3

Sum of electronic and thermal Free Energies (a.u.): -2419.734724

Thermal correction to Gibbs Free Energy (a.u.): 0.558001

Imaginary frequencies: -617.79

Calculation of single point energy based on the optimized structure, Et = -3658.8520453 a.u.

|    |             |             |             |
|----|-------------|-------------|-------------|
| C  | 0.10392800  | 4.89476900  | 1.11326300  |
| C  | 0.57093100  | 4.35980200  | 2.32929300  |
| C  | -0.44526200 | 4.08461600  | 0.13643400  |
| H  | 0.17308500  | 5.96474500  | 0.93663200  |
| C  | 0.47689200  | 2.99764100  | 2.53485800  |
| H  | 1.00174400  | 5.00547200  | 3.08654200  |
| C  | -0.56549000 | 2.68341300  | 0.32228200  |
| H  | -0.80168300 | 4.49323200  | -0.80296600 |
| C  | -0.09618500 | 2.14212800  | 1.56631100  |
| H  | 0.84565100  | 2.55427200  | 3.45595000  |
| O  | -1.05271300 | 1.96675700  | -0.65836400 |
| C  | -0.09709200 | 0.72779700  | 1.82115800  |
| Co | -1.86517600 | 0.28913000  | -0.38800000 |
| N  | -0.70458300 | -0.13756900 | 1.08462300  |
| H  | 0.49293100  | 0.37841900  | 2.66611200  |
| N  | -2.67808700 | -1.38813100 | 0.04244300  |
| C  | -0.53056900 | -1.58842200 | 1.17139400  |
| C  | -3.91129000 | -1.67175300 | -0.22525700 |
| C  | -1.91565900 | -2.21571500 | 1.00097600  |
| C  | 0.15958400  | -2.18091400 | 2.39566400  |
| H  | -4.27977500 | -2.66184600 | 0.05624200  |
| C  | -4.87574100 | -0.76005100 | -0.76440600 |
| C  | -1.75161100 | -3.69628300 | 0.65330700  |
| C  | 0.33246900  | -3.69055500 | 2.14799000  |
| H  | -0.44596800 | -1.99820300 | 3.29378900  |
| H  | 1.13943900  | -1.72727700 | 2.55584500  |
| C  | -6.10906200 | -1.25815900 | -1.23676000 |
| C  | -4.66838400 | 0.65263800  | -0.66400400 |
| C  | -0.99327700 | -4.38879800 | 1.80168000  |
| H  | -2.72334300 | -4.17950100 | 0.50406200  |
| H  | -1.19705000 | -3.77411400 | -0.28899100 |
| H  | 0.78121100  | -4.16120100 | 3.02875300  |
| H  | 1.04865700  | -3.81872200 | 1.32835600  |
| C  | -7.11766200 | -0.40488300 | -1.64054900 |
| H  | -6.25029300 | -2.33509800 | -1.28498100 |
| C  | -5.73040100 | 1.50320800  | -1.05187800 |
| O  | -3.56357400 | 1.18676800  | -0.19691500 |
| H  | -1.63936600 | -4.39683300 | 2.69021700  |
| H  | -0.80785000 | -5.43650400 | 1.54188500  |
| C  | -6.91758900 | 0.98499300  | -1.53763900 |
| H  | -8.05481300 | -0.79803500 | -2.01935500 |
| H  | -5.57204700 | 2.57266900  | -0.96383000 |
| H  | -7.70978200 | 1.66379800  | -1.84118400 |
| H  | -2.44233200 | -2.13006900 | 1.96193500  |
| H  | 0.05155500  | -1.83379800 | 0.27630500  |
| O  | -2.35893800 | 0.12958700  | -2.39800500 |
| H  | -2.21717200 | 1.02742800  | -2.72900100 |
| H  | -1.34648200 | -0.39468000 | -2.33366900 |
| O  | -3.14723100 | 1.54338100  | 2.56417100  |
| H  | -2.53169200 | 2.28692500  | 2.55849900  |
| H  | -3.44810700 | 1.49734600  | 1.63933400  |
| C  | 0.80109100  | -0.11374700 | -2.21195200 |
| C  | 1.81740200  | 0.22135400  | -1.12668500 |
| O  | -0.31949000 | -0.76894000 | -1.69029700 |
| H  | 0.52297100  | 0.87498900  | -2.62653500 |
| H  | 1.37521400  | 0.84967400  | -0.35741100 |
| H  | 2.69107500  | 0.72332200  | -1.55817900 |
| C  | 1.42480900  | -0.95721800 | -3.32967500 |
| H  | 0.68250100  | -1.13811800 | -4.11160800 |
| H  | 2.29004500  | -0.45606400 | -3.77965900 |
| H  | 1.74495000  | -1.92277100 | -2.92976800 |
| O  | 2.81482800  | 0.10064600  | 1.65900600  |
| O  | 2.25443600  | -1.03270000 | -0.52056000 |
| S  | 3.27576500  | -0.94018700 | 0.73454100  |
| O  | 3.42409000  | -2.32119100 | 1.17935100  |
| C  | 4.78589000  | -0.38587600 | -0.01987100 |
| C  | 5.58067900  | -1.30930700 | -0.70212900 |
| C  | 5.12928900  | 0.96385900  | 0.04265100  |

|   |            |             |             |
|---|------------|-------------|-------------|
| C | 6.73891600 | -0.86293500 | -1.32826300 |
| H | 5.29401600 | -2.35457500 | -0.72769000 |
| C | 6.29401900 | 1.39076000  | -0.59242600 |
| H | 4.49688500 | 1.65532100  | 0.58759900  |
| C | 7.11292600 | 0.48926400  | -1.28369900 |
| H | 7.36589700 | -1.57261300 | -1.86046600 |
| H | 6.57143900 | 2.43992300  | -0.54934700 |
| C | 8.38629400 | 0.95155600  | -1.94496900 |
| H | 8.54720000 | 0.44124600  | -2.89915500 |
| H | 8.37307900 | 2.02871700  | -2.12968900 |
| H | 9.25411300 | 0.73533800  | -1.31039100 |

**subsequent hydrolysis**

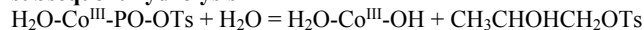

Charge: 0

Spin Multiplicity: 3

Sum of electronic and thermal Free Energies (a.u.): -2419.761493

Thermal correction to Gibbs Free Energy (a.u.): 0.560826

No imaginary frequency

Calculation of single point energy based on the optimized structure, Er = -3658.8808156 a.u.

|    |             |             |             |
|----|-------------|-------------|-------------|
| C  | 0.64568600  | 5.36801700  | -0.72773100 |
| C  | 1.25312600  | 5.26633700  | 0.54043800  |
| C  | -0.14797800 | 4.35291500  | -1.22552700 |
| H  | 0.80606400  | 6.25914200  | -1.32868100 |
| C  | 1.04241400  | 4.12693400  | 1.28858200  |
| H  | 1.87995000  | 6.06756000  | 0.91620600  |
| C  | -0.38587600 | 3.16894000  | -0.47584400 |
| H  | -0.61009200 | 4.42095800  | -2.20466600 |
| C  | 0.22189300  | 3.07465800  | 0.81839500  |
| H  | 1.51200000  | 4.01497100  | 2.26233800  |
| O  | -1.12563300 | 2.23663900  | -1.01203600 |
| C  | 0.09253800  | 1.90184500  | 1.62997300  |
| Co | -1.87458400 | 0.75486700  | -0.10889000 |
| N  | -0.67805400 | 0.89689000  | 1.37032800  |
| H  | 0.72615900  | 1.85557800  | 2.51256000  |
| N  | -2.70611000 | -0.63880800 | 0.92981000  |
| C  | -0.65372600 | -0.35799100 | 2.13197500  |
| C  | -3.52143600 | -1.49669100 | 0.42439500  |
| C  | -2.12170500 | -0.78521200 | 2.27311000  |
| C  | 0.06389600  | -0.34192400 | 3.47803800  |
| H  | -3.79721100 | -2.36878400 | 1.01380500  |
| C  | -4.13038200 | -1.39011500 | -0.87425600 |
| C  | -2.22543700 | -2.17461800 | 2.90477600  |
| C  | -0.02291700 | -1.74021500 | 4.10537200  |
| H  | -0.40176700 | 0.40293500  | 4.13880500  |
| H  | 1.11298600  | -0.06787100 | 3.34248100  |
| C  | -4.90442500 | -2.47323600 | -1.34180700 |
| C  | -4.03944400 | -0.19645300 | -1.65067800 |
| C  | -1.47759800 | -2.20322100 | 4.24708800  |
| H  | -3.27571500 | -2.44113900 | 3.07021100  |
| H  | -1.80021800 | -2.90099000 | 2.20228400  |
| H  | 0.47090500  | -1.73696300 | 5.08286700  |
| H  | 0.53399700  | -2.43880100 | 3.47020300  |
| C  | -5.57278700 | -2.41206600 | -2.55100100 |
| H  | -4.96369000 | -3.36876100 | -0.72779800 |
| C  | -4.75572000 | -0.14554400 | -2.86858800 |
| O  | -3.34379800 | 0.85990800  | -1.28664600 |
| H  | -1.99618000 | -1.55209800 | 4.96472500  |
| H  | -1.51484500 | -3.21653800 | 4.66101700  |
| C  | -5.49518000 | -1.23051400 | -3.30912100 |
| H  | -6.15412800 | -3.25667200 | -2.90463300 |
| H  | -4.68794100 | 0.76735300  | -3.45054200 |
| H  | -6.02010500 | -1.16569100 | -4.25823400 |
| H  | -2.62026700 | -0.04195200 | 2.91204900  |
| H  | -0.16269400 | -1.08385400 | 1.47298400  |
| O  | -1.20040200 | -3.21852600 | -0.15525600 |
| H  | -1.72617200 | -3.56098200 | -0.88784000 |
| H  | -1.01607400 | -2.28667100 | -0.43395600 |
| O  | -3.35768800 | 2.49063200  | 0.88970200  |
| H  | -2.86511600 | 3.26735500  | 0.59106100  |

|   |             |             |             |
|---|-------------|-------------|-------------|
| H | -3.83244300 | 2.19619800  | 0.09167500  |
| C | 0.08911700  | -0.43999000 | -1.95225600 |
| C | 1.39042700  | 0.00442500  | -1.27345600 |
| O | -0.89429500 | -0.67114400 | -0.99321000 |
| H | -0.18524300 | 0.39972900  | -2.61331200 |
| H | 1.25479500  | 0.96018000  | -0.76963800 |
| H | 2.21935000  | 0.07531200  | -1.98788100 |
| C | 0.28461400  | -1.70212800 | -2.79984900 |
| H | -0.65564400 | -1.94609800 | -3.30252500 |
| H | 1.05913300  | -1.56048100 | -3.56218900 |
| H | 0.56134800  | -2.54368000 | -2.15914600 |
| O | 2.73119300  | 0.74593500  | 1.23178400  |
| O | 1.72027700  | -1.00650800 | -0.27447400 |
| S | 2.85502100  | -0.65780700 | 0.82363400  |
| O | 2.75074700  | -1.72712900 | 1.81006000  |
| C | 4.36269500  | -0.83901400 | -0.09938400 |
| C | 4.87520600  | -2.11977000 | -0.31521300 |
| C | 4.97927900  | 0.29103100  | -0.63417900 |
| C | 6.02799800  | -2.25994600 | -1.07978200 |
| H | 4.37792100  | -2.98031500 | 0.11795200  |
| C | 6.13322100  | 0.12851300  | -1.39859600 |
| H | 4.56358600  | 1.27331900  | -0.44108400 |
| C | 6.67316000  | -1.14235000 | -1.63179900 |
| H | 6.43664600  | -3.25145900 | -1.25295100 |
| H | 6.62255900  | 1.00230600  | -1.81902900 |
| C | 7.93740000  | -1.31005000 | -2.43584100 |
| H | 7.88821900  | -2.19708800 | -3.07428800 |
| H | 8.12620200  | -0.44056200 | -3.07070600 |
| H | 8.80473900  | -1.43239500 | -1.77601400 |

#### subsequent hydrolysis

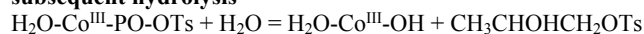

Charge: 0

Spin Multiplicity: 3

Sum of electronic and thermal Free Energies (a.u.): -2419.762640

Thermal correction to Gibbs Free Energy (a.u.): 0.562976

No imaginary frequency

Calculation of single point energy based on the optimized structure,  $E_p = -3658.8799405$  a.u.

|    |             |             |             |
|----|-------------|-------------|-------------|
| C  | 1.82402400  | 5.57898000  | 0.47012300  |
| C  | 0.46338400  | 5.50164900  | 0.12088800  |
| C  | 2.65302500  | 4.47347800  | 0.37918500  |
| H  | 2.23433100  | 6.52114300  | 0.82356600  |
| C  | -0.04211900 | 4.29869300  | -0.33404700 |
| H  | -0.17678300 | 6.37307800  | 0.20449000  |
| C  | 2.15303200  | 3.22277800  | -0.05288300 |
| H  | 3.70133500  | 4.52704000  | 0.65295400  |
| C  | 0.77835600  | 3.15177300  | -0.42873700 |
| H  | -1.08787900 | 4.20653800  | -0.61491100 |
| O  | 2.97717600  | 2.19957400  | -0.10741800 |
| C  | 0.19860700  | 1.95665500  | -0.96656700 |
| Co | 2.44869400  | 0.38496500  | -0.22738800 |
| N  | 0.77236600  | 0.80097600  | -1.02975100 |
| H  | -0.81768600 | 2.05185000  | -1.34021700 |
| N  | 2.17299000  | -1.37480900 | -0.98660700 |
| C  | 0.05861400  | -0.39407900 | -1.51248600 |
| C  | 2.75488400  | -2.44169100 | -0.55221100 |
| C  | 1.12600900  | -1.37265300 | -2.01473800 |
| C  | -1.01667100 | -0.16457900 | -2.57317100 |
| H  | 2.42924000  | -3.41012200 | -0.93347000 |
| C  | 3.82970100  | -2.46632400 | 0.39694000  |
| C  | 0.49407000  | -2.72328900 | -2.34952800 |
| C  | -1.66017500 | -1.51107600 | -2.93777800 |
| H  | -0.56518400 | 0.29526600  | -3.46282600 |
| H  | -1.78285400 | 0.51978700  | -2.20363200 |
| C  | 4.27560700  | -3.72083600 | 0.87226000  |
| C  | 4.50753400  | -1.27144700 | 0.79997100  |
| C  | -0.61576800 | -2.53598100 | -3.39591100 |
| H  | 1.24665700  | -3.42057900 | -2.73399100 |
| H  | 0.07731300  | -3.15147000 | -1.42901800 |
| H  | -2.41337600 | -1.36431000 | -3.72022300 |

|   |             |             |             |
|---|-------------|-------------|-------------|
| H | -2.18726900 | -1.90129000 | -2.05692700 |
| C | 5.35006100  | -3.82568500 | 1.73250200  |
| H | 3.74617000  | -4.61309100 | 0.54689700  |
| C | 5.62072300  | -1.41014500 | 1.66674300  |
| O | 4.18285800  | -0.06851700 | 0.39141900  |
| H | -0.16642000 | -2.19679800 | -4.33879100 |
| H | -1.09208900 | -3.50009600 | -3.60418200 |
| C | 6.02403200  | -2.65209400 | 2.12177400  |
| H | 5.67376000  | -4.79385400 | 2.09849900  |
| H | 6.13616600  | -0.50274400 | 1.96280100  |
| H | 6.87473000  | -2.72037900 | 2.79433700  |
| H | 1.59123800  | -0.94440300 | -2.91374200 |
| H | -0.39399600 | -0.84938100 | -0.62428000 |
| O | 1.62471700  | 0.07416400  | 1.47678600  |
| H | 2.32354200  | 0.11123900  | 2.14339500  |
| H | 0.58038800  | -1.15507600 | 1.43596700  |
| O | 3.88843800  | 0.79283200  | -2.29563500 |
| H | 3.81371200  | 1.68050800  | -1.90634200 |
| H | 4.52669600  | 0.36679400  | -1.70163400 |
| C | -1.23533400 | -1.33037700 | 2.15784000  |
| C | -1.46919300 | 0.17621300  | 2.04185500  |
| O | -0.19494200 | -1.77947100 | 1.31792200  |
| H | -0.96546500 | -1.47729200 | 3.22156000  |
| H | -0.52562700 | 0.71178400  | 2.15939000  |
| H | -2.19470900 | 0.52393800  | 2.78041200  |
| C | -2.47768500 | -2.15901600 | 1.85460100  |
| H | -2.25015000 | -3.21926500 | 1.99021100  |
| H | -3.31048100 | -1.89040600 | 2.51142400  |
| H | -2.79173600 | -2.00413400 | 0.81942000  |
| O | -3.44463500 | 2.28117100  | 1.71455000  |
| O | -1.95014400 | 0.51324700  | 0.69728000  |
| S | -3.24987600 | 1.46774500  | 0.51707800  |
| O | -3.05833300 | 2.08489000  | -0.79688200 |
| C | -4.56935800 | 0.28365700  | 0.40164700  |
| C | -4.71969700 | -0.45561200 | -0.77357400 |
| C | -5.38026600 | 0.05597300  | 1.51062400  |
| C | -5.69404700 | -1.44538100 | -0.82409300 |
| H | -4.08610500 | -0.25200200 | -1.62862200 |
| C | -6.35481200 | -0.93817300 | 1.43867600  |
| H | -5.24687700 | 0.65188000  | 2.40610300  |
| C | -6.52308400 | -1.70413600 | 0.27903700  |
| H | -5.81635300 | -2.02843600 | -1.73249500 |
| H | -6.99273800 | -1.12312200 | 2.29794600  |
| C | -7.58876400 | -2.76720500 | 0.19988600  |
| H | -7.22285400 | -3.65848400 | -0.31862700 |
| H | -7.93091000 | -3.06545900 | 1.19401700  |
| H | -8.46119300 | -2.40333800 | -0.35586700 |

six-coordinated H<sub>2</sub>O-Co<sup>III</sup>-OTs counterion addition in the middle carbon and subsequent hydrolysis

**H<sub>2</sub>O-Co<sup>III</sup>-OTs counterion addition in the middle carbon**

H<sub>2</sub>O-Co<sup>III</sup>-OTs + PO = H<sub>2</sub>O-Co<sup>III</sup>-PO-OTs

Charge: 0

Spin Multiplicity: 1

Sum of electronic and thermal Free Energies (a.u.): -2343.281025

Thermal correction to Gibbs Free Energy (a.u.): 0.542634

Imaginary frequencies: -248.34

Calculation of single point energy based on the optimized structure, Et = -3582.3486832 a.u.

|   |             |             |             |
|---|-------------|-------------|-------------|
| C | 2.23087900  | -4.09649200 | -1.18429800 |
| C | 3.18740000  | -3.07560700 | -1.31426900 |
| C | 0.87853000  | -3.80403700 | -1.09420300 |
| H | 2.55190400  | -5.13389400 | -1.14255400 |
| C | 2.75729900  | -1.76227700 | -1.36263800 |
| H | 4.24511400  | -3.30941800 | -1.36314200 |
| C | 0.41573700  | -2.46633400 | -1.12867700 |
| H | 0.13704500  | -4.58790500 | -0.97925700 |
| C | 1.38711400  | -1.43458300 | -1.28129200 |
| H | 3.47798900  | -0.95407100 | -1.43728200 |
| O | -0.87716900 | -2.25065000 | -1.00712500 |
| C | 1.03615500  | -0.04174900 | -1.26793400 |

|    |             |             |             |
|----|-------------|-------------|-------------|
| Co | -1.72810000 | -0.56268200 | -0.83871400 |
| N  | -0.15431500 | 0.44160900  | -1.17778100 |
| H  | 1.87455400  | 0.64803500  | -1.31776400 |
| N  | -2.63226400 | 1.12354700  | -0.81727300 |
| C  | -0.36592000 | 1.86441900  | -0.87507100 |
| C  | -3.75114400 | 1.32895200  | -0.21144300 |
| C  | -1.78490000 | 2.20308800  | -1.34564300 |
| C  | 0.66507300  | 2.84153900  | -1.43468700 |
| H  | -4.10863300 | 2.35400000  | -0.11060500 |
| C  | -4.59369500 | 0.31072100  | 0.35229200  |
| C  | -2.16877600 | 3.62759600  | -0.94630600 |
| C  | 0.28505400  | 4.27323700  | -1.03598800 |
| H  | 0.71830400  | 2.74148900  | -2.52787000 |
| H  | 1.64946100  | 2.61584200  | -1.02201500 |
| C  | -5.71714600 | 0.71439500  | 1.10630900  |
| C  | -4.35026600 | -1.07925600 | 0.12756500  |
| C  | -1.13583600 | 4.62733400  | -1.48918300 |
| H  | -3.16638100 | 3.87997300  | -1.32344100 |
| H  | -2.20217100 | 3.69373600  | 0.14885000  |
| H  | 1.00436500  | 4.97953700  | -1.46369500 |
| H  | 0.36925500  | 4.35719200  | 0.05402400  |
| C  | -6.58866400 | -0.20886700 | 1.65274700  |
| H  | -5.88382300 | 1.77840600  | 1.25701300  |
| C  | -5.26227300 | -2.00450900 | 0.68967100  |
| O  | -3.35102900 | -1.53489400 | -0.59176900 |
| H  | -1.18035500 | 4.62944400  | -2.58694200 |
| H  | -1.40167900 | 5.63837100  | -1.16304400 |
| C  | -6.34992800 | -1.57738600 | 1.43263700  |
| H  | -7.44248300 | 0.11492500  | 2.23766500  |
| H  | -5.07435600 | -3.05886700 | 0.51618900  |
| H  | -7.02761900 | -2.31475400 | 1.85423300  |
| C  | -0.20039100 | -1.11843400 | 2.41582000  |
| C  | -1.51411900 | -1.46016400 | 1.82766900  |
| O  | -1.49988000 | -0.32514700 | 0.99179600  |
| H  | -0.15065000 | -0.25741300 | 3.07043400  |
| H  | -2.35531900 | -1.44951100 | 2.53686700  |
| H  | -1.50712700 | -2.40488200 | 1.27520900  |
| C  | 0.96072700  | -2.00938100 | 2.32204100  |
| H  | 1.15253900  | -2.31171700 | 1.28891900  |
| H  | 1.84543000  | -1.56495100 | 2.76948800  |
| H  | 0.67329200  | -2.93472900 | 2.85313700  |
| H  | -1.81025400 | 2.11086400  | -2.44102300 |
| H  | -0.33501600 | 1.91843400  | 0.22027700  |
| O  | 2.09289300  | 2.74181500  | 1.84122700  |
| O  | 1.14079800  | 0.51880500  | 1.30902300  |
| S  | 2.21869200  | 1.28354000  | 2.05282000  |
| O  | 2.35041600  | 0.79631000  | 3.44540300  |
| C  | 3.72089900  | 0.78994400  | 1.18693300  |
| C  | 4.36674300  | -0.39956100 | 1.52358800  |
| C  | 4.18172900  | 1.55216400  | 0.11334200  |
| C  | 5.45381000  | -0.83509600 | 0.76977300  |
| H  | 4.02516700  | -0.96785600 | 2.38080000  |
| C  | 5.26833400  | 1.10577500  | -0.63903700 |
| H  | 3.69975300  | 2.49891300  | -0.10399500 |
| C  | 5.91751800  | -0.09633700 | -0.32742400 |
| H  | 5.95121100  | -1.76462800 | 1.03447600  |
| H  | 5.62409000  | 1.70269900  | -1.47507000 |
| C  | 7.10855600  | -0.56479900 | -1.12636300 |
| H  | 7.07844200  | -0.18258700 | -2.15073900 |
| H  | 8.04680000  | -0.21858000 | -0.67573500 |
| H  | 7.15488300  | -1.65711900 | -1.17136900 |
| O  | -2.16929400 | -0.85353200 | -2.80554600 |
| H  | -1.63152500 | -1.66401600 | -2.88063100 |
| H  | -3.06140400 | -1.19268000 | -2.59553100 |

**H<sub>2</sub>O-Co<sup>III</sup>-OTs counterion addition in the middle carbon**

H<sub>2</sub>O-Co<sup>III</sup>-OTs + PO = H<sub>2</sub>O-Co<sup>III</sup>-PO-OTs

Charge: 0

Spin Multiplicity: 1

Sum of electronic and thermal Free Energies (a.u.): -2343.309880

Thermal correction to Gibbs Free Energy (a.u.): 0.544124

No imaginary frequency

Calculation of single point energy based on the optimized structure, Er = -3582.3848742 a.u.

|    |             |             |             |
|----|-------------|-------------|-------------|
| C  | 2.26821000  | -4.14585500 | -1.22947300 |
| C  | 3.22429400  | -3.12021000 | -1.30940400 |
| C  | 0.91729200  | -3.85934100 | -1.10130000 |
| H  | 2.58760300  | -5.18412500 | -1.25759300 |
| C  | 2.79795100  | -1.80588700 | -1.27181700 |
| H  | 4.28022000  | -3.35143300 | -1.39290000 |
| C  | 0.46216000  | -2.52379700 | -1.04318200 |
| H  | 0.17710100  | -4.64851600 | -1.02041900 |
| C  | 1.42858000  | -1.48424900 | -1.15088900 |
| H  | 3.51748700  | -0.99555000 | -1.31676600 |
| O  | -0.83324200 | -2.31696500 | -0.87318700 |
| C  | 1.06932500  | -0.09511700 | -1.12674700 |
| Co | -1.69219600 | -0.64530800 | -0.72196800 |
| N  | -0.12992800 | 0.37731300  | -1.06576000 |
| H  | 1.89399000  | 0.61074500  | -1.17818300 |
| N  | -2.61656300 | 1.03044800  | -0.72298900 |
| C  | -0.35907900 | 1.82893800  | -0.93665200 |
| C  | -3.74571300 | 1.24543200  | -0.14161400 |
| C  | -1.80874700 | 2.08067200  | -1.35896700 |
| C  | 0.58371300  | 2.72498800  | -1.74136000 |
| H  | -4.11239100 | 2.27041500  | -0.08275100 |
| C  | -4.59186000 | 0.23113600  | 0.42731600  |
| C  | -2.21376500 | 3.52739800  | -1.08490800 |
| C  | 0.20633800  | 4.19324400  | -1.50389100 |
| H  | 0.51332900  | 2.46403200  | -2.80706300 |
| H  | 1.60875800  | 2.59114100  | -1.39708700 |
| C  | -5.72514400 | 0.63479300  | 1.16666400  |
| C  | -4.34640300 | -1.15761400 | 0.20347300  |
| C  | -1.26348400 | 4.47665300  | -1.83432500 |
| H  | -3.24647000 | 3.71003200  | -1.40401000 |
| H  | -2.15908900 | 3.71789400  | -0.00533400 |
| H  | 0.85590000  | 4.83924500  | -2.10348200 |
| H  | 0.42009500  | 4.42342400  | -0.45455100 |
| C  | -6.60501900 | -0.29055500 | 1.69635500  |
| H  | -5.89334300 | 1.69829200  | 1.31751900  |
| C  | -5.27022200 | -2.08420600 | 0.74007800  |
| O  | -3.31891100 | -1.61510900 | -0.48122100 |
| H  | -1.42793400 | 4.35850600  | -2.91427700 |
| H  | -1.51971100 | 5.51308200  | -1.59054300 |
| C  | -6.36823900 | -1.65801500 | 1.46929900  |
| H  | -7.46638500 | 0.03159400  | 2.27071800  |
| H  | -5.08191100 | -3.13808300 | 0.56455800  |
| H  | -7.05446000 | -2.39598300 | 1.87509200  |
| C  | -0.61270000 | -0.84724800 | 2.30570400  |
| C  | -2.04162400 | -1.19229900 | 2.24426700  |
| O  | -1.46504200 | -0.38074900 | 1.18499700  |
| H  | -0.29945500 | 0.02500900  | 2.86836100  |
| H  | -2.78552500 | -0.65743700 | 2.82732700  |
| H  | -2.31526800 | -2.19339800 | 1.92384400  |
| C  | 0.45510400  | -1.86659800 | 2.07133700  |
| H  | 0.09332800  | -2.72039000 | 1.49931000  |
| H  | 1.30279000  | -1.39864700 | 1.57267800  |
| H  | 0.79203000  | -2.21634400 | 3.05407400  |
| H  | -1.87732000 | 1.88811200  | -2.43955500 |
| H  | -0.22895800 | 2.04953200  | 0.13052500  |
| O  | 2.39447100  | 3.10657900  | 0.68470200  |
| O  | 1.25808600  | 1.06171700  | 1.52109200  |
| S  | 2.45064100  | 1.97005000  | 1.64584500  |
| O  | 2.77874100  | 2.31533400  | 3.04173500  |
| C  | 3.80576800  | 0.93349300  | 1.05225500  |
| C  | 4.08616600  | -0.27115400 | 1.70336400  |
| C  | 4.55994900  | 1.31378200  | -0.05536600 |
| C  | 5.10518200  | -1.09319900 | 1.23473700  |
| H  | 3.50272600  | -0.55546800 | 2.57258800  |
| C  | 5.58531800  | 0.48321900  | -0.51760200 |
| H  | 4.33692000  | 2.26045100  | -0.53518300 |



|   |             |             |             |
|---|-------------|-------------|-------------|
| C | 5.87236200  | -0.73036500 | 0.11669900  |
| H | 5.31069700  | -2.03482000 | 1.73783700  |
| H | 6.17154100  | 0.78411500  | -1.38257700 |
| C | 6.98794300  | -1.62186600 | -0.37096500 |
| H | 7.26488800  | -1.38830400 | -1.40292500 |
| H | 7.88786500  | -1.50478000 | 0.24518100  |
| H | 6.70390400  | -2.67857500 | -0.32528100 |
| O | -2.10019400 | -0.92909600 | -2.63854800 |
| H | -1.54673500 | -1.72894900 | -2.73566700 |
| H | -2.99494800 | -1.28735100 | -2.46768100 |

**H<sub>2</sub>O-Co<sup>III</sup>-OTs counterion addition in the middle carbon**

H<sub>2</sub>O-Co<sup>III</sup>-OTs + PO = H<sub>2</sub>O-Co<sup>III</sup>-PO-OTs

Charge: 0

Spin Multiplicity: 1

Sum of electronic and thermal Free Energies (a.u.): -2343.347832

Thermal correction to Gibbs Free Energy (a.u.): 0.545932

No imaginary frequency

Calculation of single point energy based on the optimized structure, Ep = -3582.4073616 a.u.

|    |             |             |             |
|----|-------------|-------------|-------------|
| C  | 3.04050700  | -2.37279100 | -2.50462800 |
| C  | 3.63814500  | -1.09961700 | -2.56558800 |
| C  | 1.73761200  | -2.53154800 | -2.07088500 |
| H  | 3.61101100  | -3.24878400 | -2.80256500 |
| C  | 2.90257000  | -0.00387100 | -2.16156800 |
| H  | 4.66109200  | -0.98424500 | -2.90591300 |
| C  | 0.94757400  | -1.41725300 | -1.68078300 |
| H  | 1.27089100  | -3.51009200 | -2.02601900 |
| C  | 1.56830300  | -0.13005500 | -1.71512100 |
| H  | 3.35260200  | 0.98479300  | -2.16398100 |
| O  | -0.29546500 | -1.62958300 | -1.33689600 |
| C  | 0.89957800  | 1.04887800  | -1.24344400 |
| Co | -1.58982100 | -0.30917500 | -0.86798200 |
| N  | -0.33066400 | 1.11398400  | -0.86740300 |
| H  | 1.51210700  | 1.94637200  | -1.17596600 |
| N  | -2.90727400 | 1.04076800  | -0.55948800 |
| C  | -0.90409900 | 2.30499700  | -0.23535100 |
| C  | -4.05519600 | 0.80841300  | -0.02085300 |
| C  | -2.35522300 | 2.38734400  | -0.74427100 |
| C  | -0.15406000 | 3.61892900  | -0.44142900 |
| H  | -4.67402500 | 1.65469800  | 0.28023600  |
| C  | -4.61294300 | -0.49200300 | 0.22154400  |
| C  | -3.11374600 | 3.53682400  | -0.08225300 |
| C  | -0.92242900 | 4.77449700  | 0.21463000  |
| H  | -0.03609900 | 3.81135100  | -1.51712600 |
| H  | 0.84155300  | 3.54273000  | 0.00225200  |
| C  | -5.82775300 | -0.57332400 | 0.93677900  |
| C  | -4.00010100 | -1.68335700 | -0.27883300 |
| C  | -2.36447200 | 4.85967300  | -0.29781300 |
| H  | -4.12872400 | 3.61167600  | -0.48819400 |
| H  | -3.20456800 | 3.33559600  | 0.99320400  |
| H  | -0.39805700 | 5.71863200  | 0.03265400  |
| H  | -0.93074700 | 4.62358100  | 1.30180000  |
| C  | -6.44050900 | -1.78699700 | 1.18442200  |
| H  | -6.27626100 | 0.34863400  | 1.30025700  |
| C  | -4.65298500 | -2.91315600 | -0.01871400 |
| O  | -2.90015600 | -1.69046800 | -0.99017600 |
| H  | -2.35740200 | 5.10043600  | -1.36953400 |
| H  | -2.90115700 | 5.67270900  | 0.20260500  |
| C  | -5.83821100 | -2.96038800 | 0.69431200  |
| H  | -7.36866200 | -1.83513200 | 1.74349500  |
| H  | -4.18364200 | -3.81524100 | -0.39683300 |
| H  | -6.30819500 | -3.92240700 | 0.88075700  |
| C  | 0.20578700  | -1.29140400 | 2.42857900  |
| C  | -0.97278900 | -1.59643400 | 1.51095300  |
| O  | -1.47486300 | -0.42292900 | 0.96178300  |
| H  | -0.08386600 | -0.51082000 | 3.13647900  |
| H  | -1.74023700 | -2.10131500 | 2.12669600  |
| H  | -0.64826300 | -2.31433500 | 0.74779400  |
| C  | 0.76628700  | -2.50472200 | 3.14818100  |
| H  | 1.08968500  | -3.25882300 | 2.42314300  |

|   |             |             |             |
|---|-------------|-------------|-------------|
| H | 1.61368200  | -2.22030200 | 3.77511900  |
| H | -0.00380500 | -2.95082300 | 3.78540700  |
| H | -2.31103100 | 2.56268100  | -1.82902600 |
| H | -0.93526700 | 2.06867000  | 0.83550900  |
| O | 1.57838800  | 1.77172300  | 1.65724900  |
| O | 1.26350100  | -0.74342200 | 1.55210400  |
| S | 2.13608800  | 0.49313600  | 2.11464100  |
| O | 2.35864600  | 0.31138600  | 3.55165600  |
| C | 3.62825300  | 0.18069200  | 1.19873800  |
| C | 4.10378100  | -1.12214800 | 1.04779300  |
| C | 4.34279700  | 1.27198100  | 0.71002700  |
| C | 5.30635300  | -1.32480600 | 0.38226600  |
| H | 3.52404400  | -1.95803100 | 1.41901100  |
| C | 5.55175900  | 1.04905000  | 0.05351700  |
| H | 3.94828400  | 2.27364500  | 0.83720300  |
| C | 6.04744600  | -0.24732300 | -0.12407900 |
| H | 5.67287500  | -2.33753900 | 0.24169100  |
| H | 6.11465100  | 1.89440700  | -0.33200200 |
| C | 7.32921400  | -0.49283600 | -0.87792900 |
| H | 7.91010100  | 0.42576900  | -0.99318000 |
| H | 7.95558100  | -1.23255700 | -0.36981300 |
| H | 7.11959100  | -0.88228700 | -1.88170000 |
| O | -1.93207200 | -0.24690400 | -2.92951500 |
| H | -1.20223700 | -0.84410900 | -3.16657900 |
| H | -2.68471200 | -0.85714800 | -2.79638100 |

**H<sub>2</sub>O-Co<sup>III</sup>-OTs counterion addition in the middle carbon**

H<sub>2</sub>O-Co<sup>III</sup>-OTs + PO = H<sub>2</sub>O-Co<sup>III</sup>-PO-OTs

Charge: 0

Spin Multiplicity: 3

Sum of electronic and thermal Free Energies (a.u.): -2343.273699

Thermal correction to Gibbs Free Energy (a.u.): 0.535502

Imaginary frequencies: -304.98

Calculation of single point energy based on the optimized structure, Et = -3582.3372415 a.u.

|    |             |             |             |
|----|-------------|-------------|-------------|
| C  | 2.23043200  | -4.09826000 | -1.19071000 |
| C  | 3.18283700  | -3.07675900 | -1.36115000 |
| C  | 0.88454700  | -3.80633000 | -1.04439200 |
| H  | 2.55350000  | -5.13535800 | -1.16209000 |
| C  | 2.75606000  | -1.76353300 | -1.39418700 |
| H  | 4.23684000  | -3.31443200 | -1.45382900 |
| C  | 0.42523300  | -2.46597300 | -1.05241300 |
| H  | 0.14733300  | -4.58851300 | -0.89719400 |
| C  | 1.38968100  | -1.43493000 | -1.25364000 |
| H  | 3.47327600  | -0.95628900 | -1.50310300 |
| O  | -0.85461200 | -2.24441200 | -0.86010600 |
| C  | 1.03017700  | -0.04985400 | -1.24739400 |
| Co | -1.70791300 | -0.57510100 | -0.69037400 |
| N  | -0.16302600 | 0.43113800  | -1.12565300 |
| H  | 1.85851300  | 0.64725000  | -1.34185600 |
| N  | -2.63455600 | 1.11034400  | -0.77734800 |
| C  | -0.37242100 | 1.86080800  | -0.84447100 |
| C  | -3.79886300 | 1.31646900  | -0.26107600 |
| C  | -1.78954800 | 2.18521800  | -1.32300700 |
| C  | 0.65687600  | 2.82866000  | -1.42213100 |
| H  | -4.18002600 | 2.33734200  | -0.22831300 |
| C  | -4.66599700 | 0.30635800  | 0.27282700  |
| C  | -2.18284400 | 3.61445500  | -0.95024600 |
| C  | 0.27070000  | 4.26527900  | -1.04690600 |
| H  | 0.70936300  | 2.70998800  | -2.51345000 |
| H  | 1.64010100  | 2.61583600  | -1.00105200 |
| C  | -5.86293800 | 0.71481400  | 0.90349100  |
| C  | -4.38562900 | -1.08614600 | 0.12009800  |
| C  | -1.15067600 | 4.60853600  | -1.50582400 |
| H  | -3.17757800 | 3.85795200  | -1.33999200 |
| H  | -2.22522800 | 3.69740500  | 0.14347700  |
| H  | 0.98832900  | 4.96648300  | -1.48557400 |
| H  | 0.35541700  | 4.36578500  | 0.04142600  |
| C  | -6.76934600 | -0.20536600 | 1.39205800  |
| H  | -6.05749200 | 1.77983000  | 1.00313400  |
| C  | -5.34016400 | -2.00959300 | 0.61055200  |

|   |             |             |             |
|---|-------------|-------------|-------------|
| O | -3.31103900 | -1.55421400 | -0.47187000 |
| H | -1.19475700 | 4.59437400  | -2.60345400 |
| H | -1.41969500 | 5.62346400  | -1.19468700 |
| C | -6.49653900 | -1.57731000 | 1.23487600  |
| H | -7.67857800 | 0.12205900  | 1.88404500  |
| H | -5.12343200 | -3.06512400 | 0.48602200  |
| H | -7.20345300 | -2.31138000 | 1.61142800  |
| C | -0.08338900 | -0.99518400 | 2.64336500  |
| C | -1.43844800 | -1.31194800 | 2.14448200  |
| O | -1.47384200 | -0.23954900 | 1.24865700  |
| H | 0.03561700  | -0.11890300 | 3.26809400  |
| H | -2.21319200 | -1.25158800 | 2.92751700  |
| H | -1.49630400 | -2.29544700 | 1.65783700  |
| C | 1.03148200  | -1.94419100 | 2.51643700  |
| H | 1.13713500  | -2.29887400 | 1.48776200  |
| H | 1.96572600  | -1.52575200 | 2.88019000  |
| H | 0.74291900  | -2.82776400 | 3.11401000  |
| H | -1.81299500 | 2.07003300  | -2.41602800 |
| H | -0.34026100 | 1.92952900  | 0.25022700  |
| O | 2.10189000  | 2.75120400  | 1.66407000  |
| O | 1.20454800  | 0.46476000  | 1.32931700  |
| S | 2.27880200  | 1.31676000  | 1.98056900  |
| O | 2.46503100  | 0.94317800  | 3.40085200  |
| C | 3.76606900  | 0.80118900  | 1.10133800  |
| C | 4.40851500  | -0.38754600 | 1.45059900  |
| C | 4.22100300  | 1.54342600  | 0.01249600  |
| C | 5.48307500  | -0.84273800 | 0.69230300  |
| H | 4.07757600  | -0.93783500 | 2.32356000  |
| C | 5.29681100  | 1.07676400  | -0.74499200 |
| H | 3.74683600  | 2.49251600  | -0.21105700 |
| C | 5.93634600  | -0.12734100 | -0.42566800 |
| H | 5.98070600  | -1.76829100 | 0.97024600  |
| H | 5.65152500  | 1.66126200  | -1.59001400 |
| C | 7.07389900  | -0.65302700 | -1.26589900 |
| H | 7.86655600  | -1.07919000 | -0.64314200 |
| H | 6.73204700  | -1.44673600 | -1.94192700 |
| H | 7.51331400  | 0.13560800  | -1.88265500 |
| O | -2.31902800 | -1.05819200 | -2.98594700 |
| H | -1.69892500 | -1.80276600 | -2.98944800 |
| H | -3.10007500 | -1.43117400 | -2.54279800 |

**H<sub>2</sub>O-Co<sup>III</sup>-OTs counterion addition in the middle carbon**

H<sub>2</sub>O-Co<sup>III</sup>-OTs + PO = H<sub>2</sub>O-Co<sup>III</sup>-PO-OTs

Charge: 0

Spin Multiplicity: 3

Sum of electronic and thermal Free Energies (a.u.): -2343.318518

Thermal correction to Gibbs Free Energy (a.u.): 0.537665

No imaginary frequency

Calculation of single point energy based on the optimized structure, Er = -3582.3881429 a.u.

|    |             |             |              |
|----|-------------|-------------|--------------|
| C  | 2.70849700  | -3.02222300 | -2.13021200  |
| C  | 3.44241000  | -1.82100300 | -2.13532900  |
| C  | 1.34880800  | -3.03278300 | -1.86896200  |
| H  | 3.21813500  | -3.96267600 | -2.32062500  |
| C  | 2.78661200  | -0.63083200 | -1.88952600  |
| H  | 4.51247400  | -1.82877700 | -2.30671900  |
| C  | 0.66410300  | -1.82855700 | -1.58350800  |
| H  | 0.78169800  | -3.95700000 | -1.84072600  |
| C  | 1.40007900  | -0.60937500 | -1.61909900  |
| H  | 3.32564200  | 0.30896100  | -1.85979200  |
| O  | -0.61067200 | -1.89572700 | -1.26559800  |
| C  | 0.80120200  | 0.64854600  | -1.30414900  |
| Co | -1.74744700 | -0.51146500 | -0.78300300  |
| N  | -0.45377000 | 0.83454700  | -1.02260900  |
| H  | 1.47767400  | 1.50330100  | -1.27488300  |
| N  | -2.95890300 | 0.91654900  | -0.40116500  |
| C  | -0.90570700 | 2.14475400  | -0.50916300  |
| C  | -4.07479300 | 0.78954500  | 0.23793500   |
| C  | -2.40479500 | 2.21738800  | -0.811173500 |
| C  | -0.17726300 | 3.37429400  | -1.05285300  |
| H  | -4.62556700 | 1.69240200  | 0.50145400   |

|   |             |             |             |
|---|-------------|-------------|-------------|
| C | -4.67491400 | -0.45112900 | 0.63070000  |
| C | -3.04035100 | 3.46294000  | -0.19828200 |
| C | -0.80426100 | 4.64124000  | -0.45325500 |
| H | -0.26254100 | 3.38929100  | -2.14870400 |
| H | 0.88262100  | 3.33415400  | -0.79112800 |
| C | -5.85350500 | -0.41262900 | 1.41157600  |
| C | -4.14527800 | -1.71054600 | 0.20944600  |
| C | -2.31365500 | 4.71820200  | -0.70859900 |
| H | -4.10476200 | 3.52242800  | -0.45255900 |
| H | -2.96315500 | 3.40561800  | 0.89561700  |
| H | -0.30584200 | 5.52459300  | -0.86448600 |
| H | -0.61307200 | 4.65183500  | 0.62745200  |
| C | -6.50272300 | -1.57060400 | 1.78910200  |
| H | -6.24136300 | 0.55633500  | 1.71562600  |
| C | -4.84075700 | -2.88338700 | 0.59498900  |
| O | -3.06264700 | -1.83857400 | -0.51932600 |
| H | -2.49738100 | 4.82124200  | -1.78655100 |
| H | -2.74211400 | 5.60576800  | -0.23115800 |
| C | -5.98453800 | -2.81127900 | 1.36846100  |
| H | -7.40074100 | -1.52765600 | 2.39527500  |
| H | -4.43468300 | -3.83476700 | 0.26862100  |
| H | -6.48973600 | -3.72855600 | 1.65711900  |
| C | -0.29439000 | -0.91820900 | 2.26721500  |
| C | -1.71632400 | -1.21210900 | 2.50403100  |
| O | -1.32730900 | -0.37473700 | 1.39244400  |
| H | 0.18147900  | -0.12174000 | 2.83182900  |
| H | -2.27684000 | -0.68726700 | 3.27419900  |
| H | -2.10836400 | -2.18450700 | 2.21464400  |
| C | 0.63014100  | -1.94684900 | 1.68729400  |
| H | 0.08441000  | -2.67557300 | 1.08478000  |
| H | 1.38560500  | -1.45577100 | 1.07332400  |
| H | 1.14233700  | -2.46972900 | 2.50271400  |
| H | -2.51805400 | 2.25546000  | -1.90449100 |
| H | -0.75400700 | 2.09555000  | 0.57651600  |
| O | 2.88943200  | 2.57422300  | -0.28638500 |
| O | 1.56277700  | 1.17922300  | 1.28553600  |
| S | 2.84523800  | 1.93153000  | 1.07123600  |
| O | 3.22026500  | 2.81791500  | 2.18695900  |
| C | 4.09935600  | 0.64076300  | 0.95895800  |
| C | 3.98641700  | -0.51730000 | 1.72787400  |
| C | 5.17704700  | 0.79371900  | 0.08755900  |
| C | 4.92948500  | -1.53311100 | 1.59613000  |
| H | 3.14803300  | -0.62203800 | 2.40594900  |
| C | 6.11986900  | -0.22638500 | -0.03456500 |
| H | 5.24513300  | 1.69693000  | -0.50870100 |
| C | 6.00808900  | -1.40703200 | 0.71004500  |
| H | 4.82590800  | -2.44228500 | 2.18374100  |
| H | 6.95242400  | -0.10824900 | -0.72402000 |
| C | 7.03268400  | -2.50756000 | 0.58305500  |
| H | 7.75106500  | -2.47838600 | 1.41159100  |
| H | 6.56190200  | -3.49592100 | 0.59958300  |
| H | 7.60241200  | -2.41813900 | -0.34639400 |
| O | -2.51580500 | -0.65080000 | -2.95416900 |
| H | -1.75449000 | -1.10942900 | -3.33903700 |
| H | -3.09788000 | -1.37112200 | -2.65882600 |

**H<sub>2</sub>O-Co<sup>III</sup>-OTs counterion addition in the middle carbon**

H<sub>2</sub>O-Co<sup>III</sup>-OTs + PO = H<sub>2</sub>O-Co<sup>III</sup>-PO-OTs

Charge: 0

Spin Multiplicity: 3

Sum of electronic and thermal Free Energies (a.u.): -2343.337448

Thermal correction to Gibbs Free Energy (a.u.): 0.539598

No imaginary frequency

Calculation of single point energy based on the optimized structure, E<sub>p</sub> = -3582.3955124 a.u.

|   |            |             |             |
|---|------------|-------------|-------------|
| C | 2.88302300 | -2.80968400 | -2.24852900 |
| C | 3.48248200 | -1.57784000 | -2.58015500 |
| C | 1.64039600 | -2.86223200 | -1.64870200 |
| H | 3.40601300 | -3.73688700 | -2.46795400 |
| C | 2.81139100 | -0.41157900 | -2.27962500 |
| H | 4.45834200 | -1.54859000 | -3.05205700 |

|    |             |             |             |
|----|-------------|-------------|-------------|
| C  | 0.91296900  | -1.67677800 | -1.34962800 |
| H  | 1.17253900  | -3.80722000 | -1.39372800 |
| C  | 1.53457500  | -0.42747900 | -1.67215700 |
| H  | 3.26560500  | 0.55100300  | -2.49636500 |
| O  | -0.26851200 | -1.79909300 | -0.81633500 |
| C  | 0.91933900  | 0.82492200  | -1.35358600 |
| Co | -1.53617100 | -0.42246800 | -0.54926100 |
| N  | -0.27941400 | 0.97472200  | -0.89871200 |
| H  | 1.53658800  | 1.71114200  | -1.49431900 |
| N  | -2.84204700 | 0.99079900  | -0.54578100 |
| C  | -0.81432500 | 2.26315400  | -0.44989900 |
| C  | -4.05704500 | 0.83850000  | -0.14472200 |
| C  | -2.27323800 | 2.29006000  | -0.92909900 |
| C  | -0.05449900 | 3.51493400  | -0.87975500 |
| H  | -4.68967400 | 1.72105100  | -0.04100100 |
| C  | -4.68204100 | -0.41993800 | 0.15194900  |
| C  | -3.00288900 | 3.53228100  | -0.41721000 |
| C  | -0.78265600 | 4.76427500  | -0.36399300 |
| H  | 0.01557600  | 3.54774300  | -1.97606500 |
| H  | 0.95851800  | 3.48461200  | -0.47197400 |
| C  | -5.97876700 | -0.41054100 | 0.71117500  |
| C  | -4.06986500 | -1.66182700 | -0.20113500 |
| C  | -2.24225500 | 4.80153800  | -0.83056900 |
| H  | -4.02375600 | 3.57231400  | -0.81196600 |
| H  | -3.07528600 | 3.47717100  | 0.67679300  |
| H  | -0.25555700 | 5.66496200  | -0.69609500 |
| H  | -0.74881200 | 4.76589400  | 0.73302200  |
| C  | -6.67179200 | -1.58289900 | 0.94402700  |
| H  | -6.42673300 | 0.54806000  | 0.96244900  |
| C  | -4.81203900 | -2.84668700 | 0.02070500  |
| O  | -2.87711000 | -1.75949900 | -0.74103500 |
| H  | -2.27171400 | 4.89716100  | -1.92440000 |
| H  | -2.75111300 | 5.68261800  | -0.42536300 |
| C  | -6.07415000 | -2.80560800 | 0.58663300  |
| H  | -7.66179100 | -1.56187300 | 1.38646600  |
| H  | -4.34559700 | -3.78612700 | -0.25604400 |
| H  | -6.61008200 | -3.73515700 | 0.75834800  |
| C  | 0.30926200  | -0.81488500 | 2.83138900  |
| C  | -0.92930200 | -1.30491400 | 2.08584200  |
| O  | -1.49690700 | -0.28361700 | 1.34196100  |
| H  | 0.05657700  | 0.09057700  | 3.38879500  |
| H  | -1.63396200 | -1.66845000 | 2.85604200  |
| H  | -0.64225000 | -2.17025400 | 1.46938500  |
| C  | 0.94462300  | -1.86167500 | 3.72875500  |
| H  | 1.21190100  | -2.74872000 | 3.14514100  |
| H  | 1.83954700  | -1.46302800 | 4.20972300  |
| H  | 0.23675400  | -2.16478500 | 4.50666500  |
| H  | -2.25523400 | 2.30575800  | -2.02853700 |
| H  | -0.81587700 | 2.20145100  | 0.64562700  |
| O  | 1.65068900  | 2.03717600  | 1.43101300  |
| O  | 1.28301500  | -0.44637400 | 1.77902300  |
| S  | 2.22753000  | 0.83600800  | 2.04683800  |
| O  | 2.57857500  | 0.89137600  | 3.46830500  |
| C  | 3.62358500  | 0.32993300  | 1.06809200  |
| C  | 4.03725100  | -1.00274700 | 1.05748600  |
| C  | 4.33628700  | 1.31335800  | 0.38563200  |
| C  | 5.17540900  | -1.34604900 | 0.33875800  |
| H  | 3.45798600  | -1.75497700 | 1.57799000  |
| C  | 5.48172400  | 0.95050700  | -0.32072800 |
| H  | 3.99070000  | 2.34071400  | 0.40553700  |
| C  | 5.91477300  | -0.37927600 | -0.35790900 |
| H  | 5.49077200  | -2.38479200 | 0.30621200  |
| H  | 6.04308400  | 1.71110600  | -0.85591200 |
| C  | 7.12453200  | -0.78159300 | -1.16111600 |
| H  | 7.77839300  | -1.44863500 | -0.59062500 |
| H  | 6.82387700  | -1.32178400 | -2.06702100 |
| H  | 7.70966600  | 0.08805100  | -1.47051300 |
| O  | -1.88191200 | -0.74067300 | -3.07077700 |
| H  | -1.08794600 | -1.28083700 | -3.18291700 |

H -2.49394800 -1.33714600 -2.60204600

**subsequent hydrolysis**

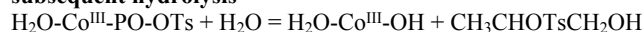

Charge: 0

Spin Multiplicity: 1

Sum of electronic and thermal Free Energies (a.u.): -2419.701127

Thermal correction to Gibbs Free Energy (a.u.): 0.566876

Imaginary frequencies: -256.98

Calculation of single point energy based on the optimized structure, Et = -3658.8234576 a.u.

|    |             |             |             |
|----|-------------|-------------|-------------|
| C  | -1.91222000 | 4.12156700  | -0.79482500 |
| C  | -2.76472500 | 3.17970100  | -1.39811000 |
| C  | -0.68413600 | 3.74666000  | -0.27823600 |
| H  | -2.21836700 | 5.16236800  | -0.73151300 |
| C  | -2.36158200 | 1.85914500  | -1.45774000 |
| H  | -3.72812200 | 3.47987300  | -1.79572300 |
| C  | -0.23934700 | 2.40124200  | -0.33912200 |
| H  | -0.02362400 | 4.46704300  | 0.19252700  |
| C  | -1.11432800 | 1.44451100  | -0.94499000 |
| H  | -3.01475600 | 1.10865000  | -1.89171300 |
| O  | 0.93430300  | 2.10971200  | 0.16823300  |
| C  | -0.80635000 | 0.03564800  | -0.96429800 |
| Co | 1.87706600  | 0.54517300  | -0.25486900 |
| N  | 0.33271500  | -0.47167100 | -0.65765400 |
| H  | -1.61820700 | -0.63308300 | -1.24400700 |
| N  | 2.85170200  | -1.04014200 | -0.68228000 |
| C  | 0.60086000  | -1.90904800 | -0.58241200 |
| C  | 4.13243900  | -1.16904100 | -0.58546200 |
| C  | 1.98756800  | -2.11091300 | -1.20746200 |
| C  | -0.42383700 | -2.83909300 | -1.22551300 |
| H  | 4.56624100  | -2.14472300 | -0.80786600 |
| C  | 5.07274300  | -0.14290700 | -0.24159200 |
| C  | 2.46478200  | -3.54855600 | -0.99249300 |
| C  | 0.02930900  | -4.29362300 | -1.03145400 |
| H  | -0.51457000 | -2.60959100 | -2.29710900 |
| H  | -1.39763800 | -2.70290700 | -0.75362700 |
| C  | 6.42628900  | -0.51517800 | -0.08974000 |
| C  | 4.69542100  | 1.22630500  | -0.09894400 |
| C  | 1.44059100  | -4.53260800 | -1.58106000 |
| H  | 3.43740500  | -3.71635300 | -1.46638400 |
| H  | 2.58920300  | -3.72167400 | 0.08379400  |
| H  | -0.68300000 | -4.97201200 | -1.51278800 |
| H  | 0.00651100  | -4.52453200 | 0.04073700  |
| C  | 7.40384800  | 0.41599100  | 0.20558700  |
| H  | 6.68946900  | -1.56418400 | -0.20362800 |
| C  | 5.71354600  | 2.16195900  | 0.19496100  |
| O  | 3.46655700  | 1.66844300  | -0.25872700 |
| H  | 1.42768600  | -4.41916100 | -2.67378400 |
| H  | 1.76129100  | -5.55986300 | -1.37765700 |
| C  | 7.03177600  | 1.76462100  | 0.34432400  |
| H  | 8.43807800  | 0.11332700  | 0.32758300  |
| H  | 5.42023100  | 3.20060600  | 0.30602800  |
| H  | 7.78820500  | 2.50948700  | 0.57629300  |
| H  | 1.89033000  | -1.92534200 | -2.28826300 |
| H  | 0.65944300  | -2.11002000 | 0.49373900  |
| O  | 3.03372800  | 0.15954700  | 1.90656400  |
| H  | 3.03108600  | 1.09291900  | 2.15435700  |
| H  | 2.05279800  | -0.16972200 | 2.06433000  |
| C  | -1.40762400 | -0.09987600 | 3.03773700  |
| C  | -0.03710000 | 0.44682800  | 2.64362900  |
| O  | 0.68797200  | -0.42561600 | 1.86466400  |
| H  | -1.29088200 | -1.12747500 | 3.39352100  |
| H  | 0.47358600  | 0.68008600  | 3.60333100  |
| H  | -0.20360800 | 1.42223400  | 2.15216000  |
| C  | -2.14261200 | 0.77161400  | 4.04230200  |
| H  | -2.24713900 | 1.78842700  | 3.64957800  |
| H  | -3.13262100 | 0.36749300  | 4.25809200  |
| H  | -1.57361000 | 0.82126300  | 4.97574300  |
| O  | -2.63653500 | -2.53690600 | 1.09768300  |
| O  | -2.20368800 | -0.14105600 | 1.78479200  |

|   |             |             |             |
|---|-------------|-------------|-------------|
| S | -3.28334700 | -1.33146400 | 1.62682200  |
| O | -4.08494200 | -1.44068900 | 2.84693900  |
| C | -4.24491700 | -0.58650800 | 0.32668600  |
| C | -4.86110600 | 0.64563400  | 0.55125300  |
| C | -4.40279500 | -1.26400400 | -0.87920200 |
| C | -5.63268100 | 1.20656600  | -0.45875400 |
| H | -4.72232400 | 1.15823200  | 1.49595400  |
| C | -5.17991600 | -0.68500600 | -1.88326200 |
| H | -3.92615900 | -2.22753000 | -1.01886300 |
| C | -5.80004800 | 0.55546600  | -1.69115600 |
| H | -6.10682100 | 2.16997300  | -0.29528300 |
| H | -5.30808000 | -1.20608400 | -2.82761400 |
| C | -6.61147400 | 1.19742500  | -2.78776400 |
| H | -7.55871500 | 1.58862900  | -2.40380700 |
| H | -6.06916500 | 2.04095600  | -3.23135500 |
| H | -6.83454500 | 0.48845900  | -3.58889200 |
| O | 1.96751300  | 1.16193600  | -2.15428800 |
| H | 1.21175600  | 1.76147100  | -2.27335300 |
| H | 2.73697800  | 1.72906500  | -1.89689900 |

#### subsequent hydrolysis

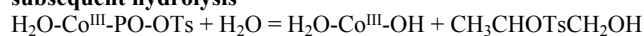

Charge: 0

Spin Multiplicity: 1

Sum of electronic and thermal Free Energies (a.u.): -2419.773734

Thermal correction to Gibbs Free Energy (a.u.): 0.567932

No imaginary frequency

Calculation of single point energy based on the optimized structure, Er = -3658.8946132 a.u.

|    |             |             |             |
|----|-------------|-------------|-------------|
| C  | 3.23812000  | -2.50917300 | -2.32367500 |
| C  | 3.81315500  | -1.23138000 | -2.45483100 |
| C  | 1.92342400  | -2.66442300 | -1.92446900 |
| H  | 3.83518300  | -3.39178600 | -2.53810000 |
| C  | 3.04288900  | -0.12549200 | -2.15617100 |
| H  | 4.84515500  | -1.11834700 | -2.76718700 |
| C  | 1.10034700  | -1.54251100 | -1.64263000 |
| H  | 1.47407800  | -3.64711300 | -1.82541800 |
| C  | 1.69619600  | -0.24833800 | -1.74829300 |
| H  | 3.47383500  | 0.86985900  | -2.21397600 |
| O  | -0.15111800 | -1.75772600 | -1.32458200 |
| C  | 0.98954000  | 0.94701100  | -1.38319100 |
| Co | -1.48256900 | -0.43427600 | -1.00177800 |
| N  | -0.25375800 | 1.01378700  | -1.05514500 |
| H  | 1.58226200  | 1.85956000  | -1.35490500 |
| N  | -2.83545200 | 0.90448100  | -0.82607400 |
| C  | -0.86870600 | 2.23153200  | -0.51640900 |
| C  | -3.97857100 | 0.68771700  | -0.27253200 |
| C  | -2.30714200 | 2.25574200  | -1.06368000 |
| C  | -0.14115300 | 3.54685700  | -0.78209400 |
| H  | -4.61221400 | 1.53865200  | -0.02969200 |
| C  | -4.50076200 | -0.60608900 | 0.07308000  |
| C  | -3.10247800 | 3.40897800  | -0.45219200 |
| C  | -0.94220300 | 4.71090900  | -0.18150700 |
| H  | -0.01743700 | 3.69091300  | -1.86483600 |
| H  | 0.85114100  | 3.51400200  | -0.32576300 |
| C  | -5.70102700 | -0.66234400 | 0.81442000  |
| C  | -3.85923200 | -1.81553800 | -0.33755800 |
| C  | -2.38123200 | 4.74029400  | -0.70844800 |
| H  | -4.11076500 | 3.44841600  | -0.88049800 |
| H  | -3.19750100 | 3.22485800  | 0.62478700  |
| H  | -0.43769000 | 5.65840000  | -0.39939500 |
| H  | -0.95691400 | 4.60230500  | 0.91003800  |
| C  | -6.27231800 | -1.86963900 | 1.17227600  |
| H  | -6.17220400 | 0.27365700  | 1.10647200  |
| C  | -4.47164500 | -3.03807400 | 0.03009500  |
| O  | -2.76390700 | -1.84592100 | -1.05747800 |
| H  | -2.36993800 | 4.94654200  | -1.78776500 |
| H  | -2.94107400 | 5.55640400  | -0.23939000 |
| C  | -5.64402700 | -3.06097100 | 0.76639000  |
| H  | -7.18968800 | -1.89862200 | 1.75011000  |
| H  | -3.98196400 | -3.95435900 | -0.28236800 |

|   |             |             |             |
|---|-------------|-------------|-------------|
| H | -6.08211500 | -4.01765800 | 1.03799000  |
| H | -2.24310200 | 2.38281100  | -2.15406900 |
| H | -0.92412700 | 2.07333700  | 0.56629600  |
| O | -2.76813500 | 1.32808900  | 2.35015000  |
| H | -3.52224100 | 0.80926700  | 2.65486100  |
| H | -2.25257400 | 0.68357300  | 1.80742300  |
| C | 0.22227400  | -1.10952900 | 2.45479600  |
| C | -0.89335300 | -1.54344500 | 1.51289800  |
| O | -1.40441600 | -0.43335700 | 0.84163900  |
| H | -0.12701900 | -0.26084400 | 3.04922800  |
| H | -1.67763300 | -2.02515500 | 2.12375500  |
| H | -0.50778400 | -2.29808400 | 0.81900200  |
| C | 0.75747300  | -2.22233000 | 3.33768700  |
| H | 1.12373300  | -3.05131800 | 2.72314800  |
| H | 1.57022900  | -1.85228100 | 3.96525200  |
| H | -0.03811700 | -2.60165000 | 3.98666000  |
| O | 1.59127100  | 1.87596000  | 1.45952300  |
| O | 1.31291200  | -0.64253600 | 1.57590800  |
| S | 2.15333300  | 0.65611800  | 2.04962100  |
| O | 2.33401500  | 0.60547100  | 3.50236900  |
| C | 3.67478400  | 0.28334500  | 1.20696900  |
| C | 4.16433200  | -1.02255300 | 1.17255000  |
| C | 4.39550200  | 1.34025600  | 0.65540100  |
| C | 5.38776500  | -1.26461500 | 0.56013300  |
| H | 3.58013600  | -1.83234800 | 1.59141100  |
| C | 5.62568800  | 1.07884400  | 0.05513100  |
| H | 3.98972100  | 2.34485700  | 0.69128700  |
| C | 6.13610000  | -0.22256100 | -0.00611900 |
| H | 5.76611600  | -2.28153900 | 0.51026700  |
| H | 6.19379900  | 1.89720900  | -0.37796100 |
| C | 7.44227600  | -0.51322700 | -0.69960500 |
| H | 8.05718600  | -1.20688400 | -0.11791400 |
| H | 7.26669100  | -0.97926700 | -1.67695300 |
| H | 8.02052100  | 0.39908900  | -0.86635800 |
| O | -1.75299100 | -0.51440600 | -3.04649500 |
| H | -1.01284400 | -1.11805400 | -3.23116400 |
| H | -2.51148800 | -1.11881700 | -2.92049700 |

**subsequent hydrolysis**

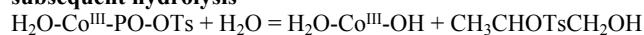

Charge: 0

Spin Multiplicity: 1

Sum of electronic and thermal Free Energies (a.u.): -2419.767535

Thermal correction to Gibbs Free Energy (a.u.): 0.569535

No imaginary frequency

Calculation of single point energy based on the optimized structure,  $E_p = -3658.8912656$  a.u.

|    |             |             |             |
|----|-------------|-------------|-------------|
| C  | 1.52261800  | -4.46743200 | 0.12388500  |
| C  | 2.56079500  | -3.53095300 | -0.04526200 |
| C  | 0.19544700  | -4.09201300 | 0.01749000  |
| H  | 1.76388400  | -5.50346800 | 0.34662500  |
| C  | 2.23094900  | -2.21905600 | -0.32352800 |
| H  | 3.59954000  | -3.83025500 | 0.04636900  |
| C  | -0.17227900 | -2.74999900 | -0.26298700 |
| H  | -0.60733100 | -4.80973400 | 0.15049300  |
| C  | 0.88423400  | -1.80380300 | -0.43673000 |
| H  | 3.00934800  | -1.47658300 | -0.45088200 |
| O  | -1.44603800 | -2.46073700 | -0.36711500 |
| C  | 0.63984100  | -0.40874600 | -0.67201900 |
| Co | -2.19697000 | -0.71867700 | -0.51594700 |
| N  | -0.51654800 | 0.15790200  | -0.73161000 |
| H  | 1.52577700  | 0.21213500  | -0.76509500 |
| N  | -2.96603100 | 1.00034700  | -0.77586000 |
| C  | -0.64777400 | 1.62480000  | -0.76234600 |
| C  | -4.13210000 | 1.34199300  | -0.34335900 |
| C  | -2.01353500 | 1.92867900  | -1.39157800 |
| C  | 0.45819400  | 2.39468000  | -1.48276700 |
| H  | -4.42408400 | 2.39138200  | -0.40023500 |
| C  | -5.11101300 | 0.43718900  | 0.18733100  |
| C  | -2.33511900 | 3.41969500  | -1.30529600 |
| C  | 0.15848000  | 3.89938600  | -1.43072900 |



|   |             |             |             |
|---|-------------|-------------|-------------|
| H | 0.52396500  | 2.04847000  | -2.52393300 |
| H | 1.42030800  | 2.22546500  | -1.00046400 |
| C | -6.28876400 | 0.97417400  | 0.75062900  |
| C | -4.95260600 | -0.98001600 | 0.08041000  |
| C | -1.22722400 | 4.23008200  | -1.99735400 |
| H | -3.30083300 | 3.63420600  | -1.77637500 |
| H | -2.41049500 | 3.71276900  | -0.25009500 |
| H | 0.93366000  | 4.44795000  | -1.97539000 |
| H | 0.22157000  | 4.22956500  | -0.38671600 |
| C | -7.29899300 | 0.15748300  | 1.22208500  |
| H | -6.38639200 | 2.05562900  | 0.81263700  |
| C | -6.00830300 | -1.79335600 | 0.55726200  |
| O | -3.91050900 | -1.55504700 | -0.47132100 |
| H | -1.24386400 | 4.00786200  | -3.07305700 |
| H | -1.43631200 | 5.30027300  | -1.89568500 |
| C | -7.14667000 | -1.23705000 | 1.11491700  |
| H | -8.19438700 | 0.58225500  | 1.66262700  |
| H | -5.88654900 | -2.86819900 | 0.47425800  |
| H | -7.93405100 | -1.89171300 | 1.47884100  |
| H | -1.95515900 | 1.63827000  | -2.45094700 |
| H | -0.66299900 | 1.93303100  | 0.29145400  |
| O | -2.20642100 | -0.43543500 | 1.29858600  |
| H | -2.20355500 | -1.33237900 | 1.66121200  |
| H | -1.13471600 | 0.55313600  | 2.01098200  |
| C | 1.96413900  | 0.56706900  | 2.87297100  |
| C | 0.53348000  | 0.05326500  | 2.81667000  |
| O | -0.36342100 | 1.04644500  | 2.40966400  |
| H | 2.01447800  | 1.46435000  | 3.49447300  |
| H | 0.30933200  | -0.31546700 | 3.83473700  |
| H | 0.50617000  | -0.81978800 | 2.14810300  |
| C | 2.92262200  | -0.51056000 | 3.35930700  |
| H | 2.93793700  | -1.34580800 | 2.65209900  |
| H | 3.93096200  | -0.11384700 | 3.47961800  |
| H | 2.58936400  | -0.88699400 | 4.33107900  |
| O | 3.13015900  | 3.03454900  | 0.40240700  |
| O | 2.29354100  | 0.96542000  | 1.49307000  |
| S | 3.59581300  | 1.88907400  | 1.18178600  |
| O | 4.37320800  | 2.08151100  | 2.40467500  |
| C | 4.45815600  | 0.78414400  | 0.07932700  |
| C | 5.26535800  | -0.22273800 | 0.60859200  |
| C | 4.24412200  | 0.88841300  | -1.29484400 |
| C | 5.83402600  | -1.15547000 | -0.25370600 |
| H | 5.44054200  | -0.27300000 | 1.67640300  |
| C | 4.81994500  | -0.05529200 | -2.14270500 |
| H | 3.63917000  | 1.69840000  | -1.68523600 |
| C | 5.60591600  | -1.09899200 | -1.63657700 |
| H | 6.46056200  | -1.94451500 | 0.15204300  |
| H | 4.65130700  | 0.01571300  | -3.21324500 |
| C | 6.16404500  | -2.15811300 | -2.55150300 |
| H | 7.11079000  | -2.55495500 | -2.17498000 |
| H | 5.46377000  | -2.99834400 | -2.63257300 |
| H | 6.32957100  | -1.77035500 | -3.56016000 |
| O | -2.37189400 | -1.19627100 | -2.52584900 |
| H | -1.89120100 | -2.03876800 | -2.43768500 |
| H | -3.30376700 | -1.45361300 | -2.37546900 |

**subsequent hydrolysis**

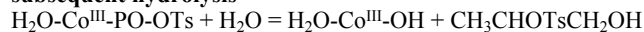

Charge: 0

Spin Multiplicity: 3

Sum of electronic and thermal Free Energies (a.u.): -2419.733242

Thermal correction to Gibbs Free Energy (a.u.): 0.558612

Imaginary frequencies: -437.48

Calculation of single point energy based on the optimized structure, Et = -3658.8492566 a.u.

|   |             |            |             |
|---|-------------|------------|-------------|
| C | -1.50996500 | 4.43221200 | 0.18328700  |
| C | -2.35260400 | 3.78991300 | -0.74418100 |
| C | -0.41304600 | 3.78576800 | 0.72369200  |
| H | -1.72010100 | 5.45612500 | 0.48040200  |
| C | -2.06945300 | 2.48838900 | -1.10741700 |
| H | -3.20916000 | 4.30776300 | -1.16225900 |

|    |             |             |             |
|----|-------------|-------------|-------------|
| C  | -0.09562800 | 2.44985200  | 0.36494000  |
| H  | 0.23767500  | 4.27710400  | 1.43892200  |
| C  | -0.95420100 | 1.80125100  | -0.58020500 |
| H  | -2.71055600 | 1.96152500  | -1.80741400 |
| O  | 0.93832900  | 1.88500000  | 0.93160800  |
| C  | -0.75755500 | 0.43490300  | -0.96622300 |
| Co | 1.81605600  | 0.36495400  | 0.26773000  |
| N  | 0.28298200  | -0.27343500 | -0.69224100 |
| H  | -1.56980800 | -0.02907300 | -1.52452800 |
| N  | 2.69459900  | -1.14022100 | -0.54118900 |
| C  | 0.36302700  | -1.72005100 | -0.91599700 |
| C  | 3.97869800  | -1.25241600 | -0.63742700 |
| C  | 1.80520000  | -2.02832000 | -1.31502900 |
| C  | -0.58640300 | -2.34725000 | -1.93290700 |
| H  | 4.37898100  | -2.16036400 | -1.09444400 |
| C  | 4.93488100  | -0.24284900 | -0.29307000 |
| C  | 2.05431600  | -3.53360100 | -1.19524700 |
| C  | -0.38051700 | -3.87136200 | -1.90270100 |
| H  | -0.38179000 | -1.94171200 | -2.93314200 |
| H  | -1.62278900 | -2.13101400 | -1.67684900 |
| C  | 6.30469400  | -0.57789000 | -0.24567000 |
| C  | 4.53012400  | 1.12155800  | -0.16706600 |
| C  | 1.08416900  | -4.27256200 | -2.13483200 |
| H  | 3.08581600  | -3.79097300 | -1.45728100 |
| H  | 1.89557800  | -3.83443100 | -0.15297800 |
| H  | -1.01954000 | -4.34768700 | -2.65395900 |
| H  | -0.71795400 | -4.23585600 | -0.92587900 |
| C  | 7.27164800  | 0.38985200  | -0.04984200 |
| H  | 6.58886100  | -1.62105300 | -0.36051900 |
| C  | 5.54048200  | 2.09696900  | -0.00363800 |
| O  | 3.27612300  | 1.50903000  | -0.22876200 |
| H  | 1.36192200  | -4.04435900 | -3.17287800 |
| H  | 1.20248600  | -5.35422600 | -2.01061900 |
| C  | 6.87500200  | 1.73514300  | 0.06426300  |
| H  | 8.32073800  | 0.11989700  | 0.00260000  |
| H  | 5.22903000  | 3.13267000  | 0.07979900  |
| H  | 7.62796400  | 2.50545900  | 0.20621700  |
| H  | 1.92733900  | -1.73087900 | -2.36678200 |
| H  | 0.17695900  | -2.15050300 | 0.07463200  |
| O  | 2.94305400  | 0.03286600  | 2.02151900  |
| H  | 2.85716100  | 0.86746100  | 2.50282000  |
| H  | 2.01938100  | -0.55950400 | 2.21376800  |
| C  | -1.40720000 | -1.02005200 | 2.94898900  |
| C  | -0.03916900 | -0.35948500 | 2.84682600  |
| O  | 0.81384400  | -0.97541900 | 1.93471100  |
| H  | -1.28427800 | -2.10627700 | 2.99425600  |
| H  | 0.38177400  | -0.39175400 | 3.86988300  |
| H  | -0.20384300 | 0.70457400  | 2.61082700  |
| C  | -2.22130400 | -0.48677700 | 4.11844300  |
| H  | -2.30981200 | 0.60240800  | 4.04643400  |
| H  | -3.21843400 | -0.92605700 | 4.13526700  |
| H  | -1.71592600 | -0.72746100 | 5.05869400  |
| O  | -2.63318300 | -2.77994400 | 0.35816900  |
| O  | -2.10180100 | -0.69291200 | 1.68292400  |
| S  | -3.24468300 | -1.71404500 | 1.15752500  |
| O  | -4.12745900 | -2.08668500 | 2.26391400  |
| C  | -4.06696600 | -0.57023100 | 0.06939900  |
| C  | -4.52482900 | 0.64734300  | 0.57689700  |
| C  | -4.29007100 | -0.93008700 | -1.25708400 |
| C  | -5.20086700 | 1.51728400  | -0.26878800 |
| H  | -4.33428100 | 0.91202000  | 1.61017300  |
| C  | -4.96783800 | -0.04166400 | -2.09296000 |
| H  | -3.94157700 | -1.89010900 | -1.61994400 |
| C  | -5.42847500 | 1.19087800  | -1.61496900 |
| H  | -5.54474300 | 2.47324100  | 0.11458000  |
| H  | -5.14306900 | -0.31264600 | -3.12996300 |
| C  | -6.12603100 | 2.16778900  | -2.52670000 |
| H  | -6.42917500 | 1.69576000  | -3.46441900 |
| H  | -7.01728600 | 2.58828700  | -2.05087500 |

|   |             |            |             |
|---|-------------|------------|-------------|
| H | -5.46557000 | 3.00731800 | -2.77510600 |
| O | 1.72592400  | 2.06315700 | -2.46278600 |
| H | 1.09692700  | 2.70092000 | -2.10302200 |
| H | 2.43009600  | 2.03219800 | -1.79061300 |

**subsequent hydrolysis**

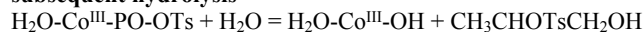

Charge: 0

Spin Multiplicity: 3

Sum of electronic and thermal Free Energies (a.u.): -2419.766105

Thermal correction to Gibbs Free Energy (a.u.): 0.565026

No imaginary frequency

Calculation of single point energy based on the optimized structure, Er = -3658.8857235 a.u.

|    |             |             |             |
|----|-------------|-------------|-------------|
| C  | 2.81657800  | -3.82950100 | -1.37317600 |
| C  | 3.50004000  | -2.82879800 | -2.09329800 |
| C  | 1.60347500  | -3.57214100 | -0.76476700 |
| H  | 3.24499700  | -4.82565900 | -1.30150600 |
| C  | 2.95122800  | -1.56441900 | -2.15546200 |
| H  | 4.44325800  | -3.04932800 | -2.58155900 |
| C  | 0.99176300  | -2.29064700 | -0.84881300 |
| H  | 1.06717600  | -4.34190400 | -0.22018000 |
| C  | 1.71216200  | -1.26520900 | -1.54468700 |
| H  | 3.47353400  | -0.76526100 | -2.67391800 |
| O  | -0.17926500 | -2.12828500 | -0.30319600 |
| C  | 1.23685500  | 0.08501800  | -1.59075600 |
| Co | -1.33429100 | -0.66036300 | -0.58255900 |
| N  | 0.07641700  | 0.48084200  | -1.18641900 |
| H  | 1.93289700  | 0.82535600  | -1.98373000 |
| N  | -2.47774600 | 0.81536500  | -1.04628900 |
| C  | -0.33793200 | 1.88450700  | -1.14670500 |
| C  | -3.71021900 | 0.88559400  | -0.67697000 |
| C  | -1.76693000 | 1.92242000  | -1.70592600 |
| C  | 0.56911200  | 2.90106300  | -1.82883200 |
| H  | -4.24557000 | 1.82395500  | -0.82016200 |
| C  | -4.46804500 | -0.19610900 | -0.11247500 |
| C  | -2.36956400 | 3.31578500  | -1.51791300 |
| C  | -0.03075100 | 4.30408100  | -1.65281000 |
| H  | 0.67170000  | 2.66283800  | -2.89708100 |
| H  | 1.56759200  | 2.86764700  | -1.38216300 |
| C  | -5.76816300 | 0.07320900  | 0.36687400  |
| C  | -3.98296000 | -1.53913600 | -0.12971900 |
| C  | -1.46906800 | 4.37015400  | -2.18057000 |
| H  | -3.37192100 | 3.36837400  | -1.95689400 |
| H  | -2.44953700 | 3.50151900  | -0.43998200 |
| H  | 0.59573700  | 5.04373800  | -2.16286800 |
| H  | -0.02269700 | 4.55725500  | -0.58580400 |
| C  | -6.58545000 | -0.93736700 | 0.83711900  |
| H  | -6.11677200 | 1.10295300  | 0.36548300  |
| C  | -4.84903500 | -2.55948200 | 0.32628000  |
| O  | -2.78881900 | -1.87613200 | -0.56724200 |
| H  | -1.46402000 | 4.21411600  | -3.26838300 |
| H  | -1.88813800 | 5.36721700  | -2.00913000 |
| C  | -6.11342500 | -2.26177000 | 0.80570200  |
| H  | -7.57675100 | -0.71476200 | 1.21654100  |
| H  | -4.47775100 | -3.57845000 | 0.30249700  |
| H  | -6.74811300 | -3.06668400 | 1.16612700  |
| H  | -1.72145100 | 1.66783000  | -2.77492200 |
| H  | -0.41444100 | 2.13718400  | -0.08666600 |
| O  | -1.68815700 | 2.59591600  | 1.76203900  |
| H  | -0.74963700 | 2.77004000  | 1.92126800  |
| H  | -1.70696800 | 1.62263500  | 1.60136700  |
| C  | -0.02863800 | -0.27070900 | 3.11222400  |
| C  | -1.15275500 | -0.89657800 | 2.29246800  |
| O  | -1.50216300 | -0.06613300 | 1.23590000  |
| H  | -0.32588500 | 0.74291800  | 3.39764900  |
| H  | -2.00623500 | -1.04796800 | 2.97676000  |
| H  | -0.82421100 | -1.88690300 | 1.94682000  |
| C  | 0.40484700  | -1.08655700 | 4.31522700  |
| H  | 0.72495300  | -2.08466800 | 4.00002500  |
| H  | 1.22907600  | -0.59532000 | 4.83540000  |

|   |             |             |             |
|---|-------------|-------------|-------------|
| H | -0.43367600 | -1.19691000 | 5.00998700  |
| O | 1.29305000  | 2.29743100  | 1.60192300  |
| O | 1.11284300  | -0.16789900 | 2.17486100  |
| S | 1.99700700  | 1.17747900  | 2.24831500  |
| O | 2.47931100  | 1.37250900  | 3.61678600  |
| C | 3.30491300  | 0.64556400  | 1.17123300  |
| C | 3.83598500  | -0.64020900 | 1.29604400  |
| C | 3.82727400  | 1.56086900  | 0.26150400  |
| C | 4.89838400  | -1.00746500 | 0.48140700  |
| H | 3.40320400  | -1.34138400 | 1.99873200  |
| C | 4.89717700  | 1.17362200  | -0.54533500 |
| H | 3.39822400  | 2.55373200  | 0.19057100  |
| C | 5.44487700  | -0.11006000 | -0.44885400 |
| H | 5.29940200  | -2.01369200 | 0.55089700  |
| H | 5.31092000  | 1.87986300  | -1.25947600 |
| C | 6.57428500  | -0.54609000 | -1.34485800 |
| H | 6.95546600  | 0.28273900  | -1.94635100 |
| H | 7.40642400  | -0.95665600 | -0.76378100 |
| H | 6.23841900  | -1.33517900 | -2.02754300 |
| O | -1.49808500 | -1.57444300 | -2.92838300 |
| H | -0.77170100 | -2.21174100 | -2.89939100 |
| H | -2.21031400 | -2.00432500 | -2.42009100 |

**subsequent hydrolysis**

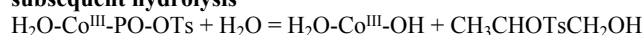

Charge: 0

Spin Multiplicity: 3

Sum of electronic and thermal Free Energies (a.u.): -2419.756289

Thermal correction to Gibbs Free Energy (a.u.): 0.562744

No imaginary frequency

Calculation of single point energy based on the optimized structure, Ep = -3658.8783436 a.u.

|    |             |             |             |
|----|-------------|-------------|-------------|
| C  | -1.53176100 | 4.46465200  | 0.01445000  |
| C  | -2.56054100 | 3.50696800  | -0.06225900 |
| C  | -0.20028400 | 4.09188500  | -0.05306900 |
| H  | -1.78266200 | 5.51543000  | 0.13197500  |
| C  | -2.22160000 | 2.17632400  | -0.21556600 |
| H  | -3.60200800 | 3.80489700  | -0.00252400 |
| C  | 0.17359100  | 2.73196500  | -0.18657600 |
| H  | 0.59659400  | 4.82533500  | 0.00793600  |
| C  | -0.87141600 | 1.76599400  | -0.27870800 |
| H  | -2.99316100 | 1.42014600  | -0.28025400 |
| O  | 1.45073200  | 2.43115300  | -0.24077000 |
| C  | -0.60232300 | 0.36966700  | -0.47469300 |
| Co | 2.20989200  | 0.68482000  | -0.07383300 |
| N  | 0.55993700  | -0.18764500 | -0.45329300 |
| H  | -1.47023800 | -0.25947900 | -0.64297700 |
| N  | 3.01605800  | -0.93273600 | -0.80695400 |
| C  | 0.74120100  | -1.63854600 | -0.62137800 |
| C  | 4.25344200  | -1.26219300 | -0.64305500 |
| C  | 2.02287700  | -1.80069100 | -1.45188500 |
| C  | -0.42955900 | -2.40091400 | -1.23486600 |
| H  | 4.58560600  | -2.24336600 | -0.98609000 |
| C  | 5.26094300  | -0.43718800 | -0.04365600 |
| C  | 2.39776100  | -3.27325600 | -1.61552600 |
| C  | -0.05719600 | -3.87953100 | -1.40742900 |
| H  | -0.68267600 | -1.95986900 | -2.20981500 |
| H  | -1.30418900 | -2.33382900 | -0.58767700 |
| C  | 6.54813100  | -0.99183300 | 0.14886900  |
| C  | 5.01699500  | 0.92883100  | 0.30859700  |
| C  | 1.22402700  | -4.05190500 | -2.23007000 |
| H  | 3.28365600  | -3.37671000 | -2.25166600 |
| H  | 2.64826600  | -3.69194600 | -0.63175200 |
| H  | -0.89026000 | -4.41326000 | -1.87545600 |
| H  | 0.07982800  | -4.32726400 | -0.41504000 |
| C  | 7.58230600  | -0.24964500 | 0.68107000  |
| H  | 6.70859600  | -2.03025500 | -0.13117400 |
| C  | 6.10084400  | 1.67158900  | 0.84273600  |
| O  | 3.87408800  | 1.54511100  | 0.13362100  |
| H  | 1.05243400  | -3.69184300 | -3.25351400 |
| H  | 1.48921300  | -5.11136600 | -2.31076500 |

|   |             |             |             |
|---|-------------|-------------|-------------|
| C | 7.34409000  | 1.09557800  | 1.02440100  |
| H | 8.56125300  | -0.69143100 | 0.83076300  |
| H | 5.91208300  | 2.70754100  | 1.10311200  |
| H | 8.14971500  | 1.69292300  | 1.44240700  |
| H | 1.83186700  | -1.36083400 | -2.44100700 |
| H | 0.92130600  | -2.02958300 | 0.38728300  |
| O | 2.09250600  | 0.19696300  | 1.73317800  |
| H | 2.68290800  | 0.76366600  | 2.24690600  |
| H | 0.90290900  | -0.77517500 | 2.33259700  |
| C | -2.27968800 | -0.68386400 | 2.87573500  |
| C | -0.83252400 | -0.21850800 | 2.92984000  |
| O | 0.05120300  | -1.23608600 | 2.55134800  |
| H | -2.40220400 | -1.59552700 | 3.46562700  |
| H | -0.66399700 | 0.11321100  | 3.97079900  |
| H | -0.73051000 | 0.67197000  | 2.29278900  |
| C | -3.23292500 | 0.41392700  | 3.32653200  |
| H | -3.15714800 | 1.27513600  | 2.65528900  |
| H | -4.26244900 | 0.05613700  | 3.34621000  |
| H | -2.96724600 | 0.73963800  | 4.33666700  |
| O | -3.35484400 | -3.06114300 | 0.29065300  |
| O | -2.52861500 | -1.03169000 | 1.46544200  |
| S | -3.83749200 | -1.89947000 | 1.03443000  |
| O | -4.72865500 | -2.06238800 | 2.18165500  |
| C | -4.53847700 | -0.74551600 | -0.12811200 |
| C | -5.38087200 | 0.26619700  | 0.33176100  |
| C | -4.14257700 | -0.80524600 | -1.46440700 |
| C | -5.80137800 | 1.24963700  | -0.55945400 |
| H | -5.69357200 | 0.28095000  | 1.36912300  |
| C | -4.57016300 | 0.18966900  | -2.34019700 |
| H | -3.50971400 | -1.61801800 | -1.80178500 |
| C | -5.38607100 | 1.24034100  | -1.89902700 |
| H | -6.45408600 | 2.04382500  | -0.20872500 |
| H | -4.25714300 | 0.15703300  | -3.37962800 |
| C | -5.77173800 | 2.35917100  | -2.83118500 |
| H | -5.82989300 | 2.01673100  | -3.86778400 |
| H | -6.73570600 | 2.79635500  | -2.55723800 |
| H | -5.02223400 | 3.15896400  | -2.79020400 |
| O | 2.69781900  | 1.56649400  | -2.52793100 |
| H | 2.17384700  | 2.24518900  | -2.06807500 |
| H | 3.56727000  | 1.68003500  | -2.11680000 |

PO-Co<sup>III</sup>-Cl + H<sub>2</sub>O-Co<sup>III</sup>-OH bimetallic PO ring-opening in the terminal carbon and subsequent hydration

**PO-Co<sup>III</sup>-Cl + H<sub>2</sub>O-Co<sup>III</sup>-OH bimetallic PO ring-opening in the terminal carbon**

PO-Co<sup>III</sup>-Cl + H<sub>2</sub>O-Co<sup>III</sup>-OH = Cl-Co<sup>III</sup>-PO-OH-Co<sup>III</sup>-H<sub>2</sub>O

Charge: 0

Spin Multiplicity: 1

Sum of electronic and thermal Free Energies (a.u.): -3163.779196

Thermal correction to Gibbs Free Energy (a.u.): 0.785100

Imaginary frequencies: -451.69

Calculation of single point energy based on the optimized structure, Et = -5640.9813907 a.u.

|    |            |             |             |
|----|------------|-------------|-------------|
| C  | 5.64560300 | -3.20559600 | -3.11866600 |
| C  | 4.91201200 | -4.18528800 | -2.42404700 |
| C  | 5.61383900 | -1.87712600 | -2.73196500 |
| H  | 6.24356600 | -3.49332000 | -3.97925200 |
| C  | 4.16072700 | -3.80003900 | -1.33102100 |
| H  | 4.93948300 | -5.22240500 | -2.73981000 |
| C  | 4.83857700 | -1.45144100 | -1.62616800 |
| H  | 6.17203500 | -1.11855100 | -3.27051100 |
| C  | 4.10547100 | -2.45158200 | -0.91100500 |
| H  | 3.58922500 | -4.53705400 | -0.77177900 |
| O  | 4.85696400 | -0.18090700 | -1.30078400 |
| C  | 3.34422500 | -2.14616400 | 0.26400300  |
| Co | 3.51121200 | 0.63844300  | -0.23179200 |
| N  | 3.15401900 | -0.96434400 | 0.75047100  |
| H  | 2.88740500 | -2.99501500 | 0.77847700  |
| N  | 2.34807300 | 1.46841700  | 1.02352500  |
| C  | 2.27701100 | -0.76098400 | 1.91835900  |
| C  | 1.66900100 | 2.54455800  | 0.82562400  |
| C  | 2.35925000 | 0.72240600  | 2.28473400  |

|    |             |             |             |
|----|-------------|-------------|-------------|
| C  | 2.61614200  | -1.60018900 | 3.15444000  |
| H  | 0.96378900  | 2.87610000  | 1.58656200  |
| C  | 1.78352900  | 3.36182800  | -0.35123500 |
| C  | 1.30566900  | 1.06139600  | 3.33376100  |
| C  | 1.61819400  | -1.27923500 | 4.28053400  |
| H  | 3.64164000  | -1.36740300 | 3.46946900  |
| H  | 2.59050700  | -2.66903900 | 2.92136000  |
| C  | 0.83113900  | 4.38505100  | -0.55061300 |
| C  | 2.85969800  | 3.18598600  | -1.27738400 |
| C  | 1.57120400  | 0.22197300  | 4.59442200  |
| H  | 1.34777400  | 2.12578800  | 3.59021400  |
| H  | 0.31019500  | 0.84423900  | 2.92954200  |
| H  | 1.88011200  | -1.84661800 | 5.17980900  |
| H  | 0.61552500  | -1.60461400 | 3.97951300  |
| C  | 0.90230000  | 5.22199200  | -1.64922200 |
| H  | 0.02367100  | 4.49030600  | 0.16852100  |
| C  | 2.91063700  | 4.06369800  | -2.38668400 |
| O  | 3.80954300  | 2.28303700  | -1.14131900 |
| H  | 2.52620700  | 0.53374400  | 5.03917900  |
| H  | 0.79430700  | 0.42262900  | 5.33879800  |
| C  | 1.95469100  | 5.05185000  | -2.56556900 |
| H  | 0.15644700  | 5.99440300  | -1.80148600 |
| H  | 3.72549700  | 3.93205900  | -3.09091400 |
| H  | 2.02186000  | 5.70216300  | -3.43359400 |
| O  | 2.21084800  | 0.15147300  | -1.44485000 |
| H  | 2.39518100  | 0.69803300  | -2.22181900 |
| O  | 5.15643500  | 1.19961400  | 0.86564600  |
| H  | 5.20070700  | 2.08084900  | 0.44936100  |
| H  | 5.74197800  | 0.64739600  | 0.31014900  |
| C  | -0.54560800 | 1.02682900  | -1.28578300 |
| C  | 0.21202600  | -0.21698800 | -1.30553200 |
| O  | -1.56389000 | 0.02873100  | -1.22632100 |
| H  | -0.45489600 | 1.59781300  | -0.36669100 |
| H  | 0.38149800  | -0.73149400 | -0.37641400 |
| H  | 0.29548300  | -0.76492600 | -2.23191400 |
| C  | -0.61882500 | 1.89139000  | -2.52165200 |
| H  | -1.44411800 | 2.60344500  | -2.42989700 |
| H  | 0.30627300  | 2.46002600  | -2.64785600 |
| H  | -0.78437700 | 1.27199900  | -3.40855500 |
| C  | -1.73104200 | 4.47397300  | 2.28374300  |
| C  | -2.63544200 | 5.01716200  | 1.35089300  |
| C  | -1.48801000 | 3.11404900  | 2.33936500  |
| H  | -1.21852200 | 5.13208100  | 2.98088300  |
| C  | -3.32892700 | 4.14657600  | 0.53242400  |
| H  | -2.81517100 | 6.08560300  | 1.30841100  |
| C  | -2.11634700 | 2.19824300  | 1.44333000  |
| H  | -0.81820100 | 2.70266600  | 3.08273500  |
| C  | -3.11155100 | 2.75099900  | 0.56927000  |
| H  | -4.08134300 | 4.52909400  | -0.15401900 |
| O  | -1.75121000 | 0.95421500  | 1.45644500  |
| C  | -3.99854400 | 1.91704900  | -0.18908000 |
| Co | -2.51985500 | -0.45279100 | 0.40357500  |
| N  | -3.94490500 | 0.63336100  | -0.25940500 |
| H  | -4.81245900 | 2.43464000  | -0.69810100 |
| N  | -3.26423800 | -1.82662500 | -0.69860900 |
| C  | -4.98196100 | -0.17357500 | -0.90883500 |
| C  | -2.93899000 | -3.07174100 | -0.66405800 |
| C  | -4.23478800 | -1.28695000 | -1.65688300 |
| C  | -5.95702100 | 0.56207200  | -1.82652700 |
| H  | -3.46090000 | -3.76476100 | -1.32476800 |
| C  | -1.92817300 | -3.64992500 | 0.16830500  |
| C  | -5.20816900 | -2.28506900 | -2.28505100 |
| C  | -6.93763800 | -0.43607400 | -2.45880500 |
| H  | -5.39682000 | 1.08493000  | -2.61375400 |
| H  | -6.51515900 | 1.31841100  | -1.26486100 |
| C  | -1.77074000 | -5.05396900 | 0.12758300  |
| C  | -1.06232800 | -2.85102400 | 0.98311900  |
| C  | -6.19919700 | -1.55395400 | -3.20248500 |
| H  | -4.66640400 | -3.04019700 | -2.86395900 |

|    |             |             |             |
|----|-------------|-------------|-------------|
| H  | -5.75008600 | -2.81034600 | -1.48779200 |
| H  | -7.61602100 | 0.09036000  | -3.13853300 |
| H  | -7.56073100 | -0.87549200 | -1.66888600 |
| C  | -0.80426100 | -5.70300700 | 0.86947900  |
| H  | -2.44043300 | -5.62556700 | -0.51134800 |
| C  | -0.09021200 | -3.55344200 | 1.74865500  |
| O  | -1.08323500 | -1.55071100 | 1.03754100  |
| H  | -5.65234700 | -1.12398100 | -4.05248300 |
| H  | -6.91414400 | -2.27083400 | -3.61986800 |
| C  | 0.03558900  | -4.92841400 | 1.69109700  |
| H  | -0.70115500 | -6.78172800 | 0.82889200  |
| H  | 0.53665600  | -2.97187200 | 2.40740700  |
| H  | 0.79002700  | -5.41752400 | 2.30271500  |
| H  | -5.53592500 | -0.64815800 | -0.08795300 |
| H  | -3.64340000 | -0.80506300 | -2.44777000 |
| H  | 3.35833800  | 0.89894400  | 2.70768900  |
| H  | 1.24363100  | -0.96875800 | 1.60939000  |
| Cl | -3.84293400 | -1.10345600 | 2.12973000  |

**PO-Co<sup>III</sup>-Cl + H<sub>2</sub>O-Co<sup>III</sup>-OH bimetallic PO ring-opening in the terminal carbon**

PO-Co<sup>III</sup>-Cl + H<sub>2</sub>O-Co<sup>III</sup>-OH = Cl-Co<sup>III</sup>-PO-OH-Co<sup>III</sup>-H<sub>2</sub>O

Charge: 0

Spin Multiplicity: 1

Sum of electronic and thermal Free Energies (a.u.): -3163.794042

Thermal correction to Gibbs Free Energy (a.u.): 0.781950

No imaginary frequency

Calculation of single point energy based on the optimized structure, Er = -5640.9951122 a.u.

|    |            |             |             |
|----|------------|-------------|-------------|
| C  | 5.57961900 | -3.53147700 | -3.08882700 |
| C  | 4.78088900 | -4.46533300 | -2.40225000 |
| C  | 5.61414500 | -2.20191100 | -2.70867100 |
| H  | 6.17644300 | -3.85675900 | -3.93686900 |
| C  | 4.03234700 | -4.03132600 | -1.32581600 |
| H  | 4.75700800 | -5.50462200 | -2.71141700 |
| C  | 4.84438900 | -1.72568300 | -1.61722100 |
| H  | 6.22286400 | -1.47782300 | -3.24017400 |
| C  | 4.04403300 | -2.68000900 | -0.91125400 |
| H  | 3.41149900 | -4.73296100 | -0.77327800 |
| O  | 4.92421400 | -0.45643600 | -1.30432200 |
| C  | 3.26935400 | -2.32663800 | 0.24253900  |
| Co | 3.68249900 | 0.44973600  | -0.18221100 |
| N  | 3.15121800 | -1.14065400 | 0.73727700  |
| H  | 2.73471300 | -3.14658600 | 0.72840500  |
| N  | 2.58699100 | 1.35678100  | 1.07856000  |
| C  | 2.23857700 | -0.88657500 | 1.86580800  |
| C  | 2.01351000 | 2.49346900  | 0.88192700  |
| C  | 2.45832900 | 0.56623000  | 2.30209700  |
| C  | 2.42364300 | -1.79906200 | 3.08389700  |
| H  | 1.30980800 | 2.86922000  | 1.62344600  |
| C  | 2.24618600 | 3.32388400  | -0.26680500 |
| C  | 1.39562700 | 0.97270400  | 3.31870700  |
| C  | 1.41223700 | -1.41685000 | 4.17796000  |
| H  | 3.45090700 | -1.68517300 | 3.45372500  |
| H  | 2.30343700 | -2.85189000 | 2.81126700  |
| C  | 1.40103100 | 4.43555900  | -0.47177500 |
| C  | 3.33847000 | 3.07228100  | -1.15844000 |
| C  | 1.51198000 | 0.06691200  | 4.55502500  |
| H  | 1.52615700 | 2.01918700  | 3.61672200  |
| H  | 0.40301000 | 0.86474800  | 2.86663700  |
| H  | 1.56777800 | -2.04456800 | 5.06184400  |
| H  | 0.39590900 | -1.61799000 | 3.81923900  |
| C  | 1.58634100 | 5.28816000  | -1.54468800 |
| H  | 0.57965400 | 4.59601200  | 0.22118900  |
| C  | 3.50850800 | 3.96956000  | -2.24107100 |
| O  | 4.19745700 | 2.09163300  | -1.00606500 |
| H  | 2.47345000 | 0.25676600  | 5.05129400  |
| H  | 0.72739800 | 0.32269200  | 5.27418900  |
| C  | 2.65266200 | 5.04310600  | -2.42818800 |
| H  | 0.92080900 | 6.13010700  | -1.70194300 |
| H  | 4.33341000 | 3.78028600  | -2.92006400 |
| H  | 2.81000700 | 5.70461000  | -3.27611900 |

|    |             |             |             |
|----|-------------|-------------|-------------|
| O  | 2.30688900  | 0.22469300  | -1.35954500 |
| H  | 2.75060300  | 0.37982200  | -2.20592400 |
| O  | 5.39917600  | 0.80133400  | 0.96116000  |
| H  | 5.49880900  | 1.68475400  | 0.55828400  |
| H  | 5.92599300  | 0.22247800  | 0.37849700  |
| C  | -0.38706200 | 0.90521800  | -1.28787900 |
| C  | -0.43615700 | -0.48585400 | -1.70149400 |
| O  | -1.68144300 | 0.17942200  | -1.29308400 |
| H  | -0.04025200 | 1.08372900  | -0.27903500 |
| H  | -0.09493800 | -1.24317200 | -1.00979400 |
| H  | -0.42898800 | -0.73724800 | -2.75859300 |
| C  | -0.31455500 | 2.04326300  | -2.25740000 |
| H  | -0.82384100 | 2.92531200  | -1.86022700 |
| H  | 0.73604900  | 2.29531300  | -2.41485600 |
| H  | -0.76850000 | 1.76693800  | -3.21375200 |
| C  | -1.41920100 | 4.55545800  | 2.09672100  |
| C  | -2.32994600 | 5.14992500  | 1.20102300  |
| C  | -1.27855200 | 3.18297300  | 2.17208700  |
| H  | -0.81999200 | 5.18522300  | 2.74949800  |
| C  | -3.12861600 | 4.32242100  | 0.43807000  |
| H  | -2.42799400 | 6.22816200  | 1.14332100  |
| C  | -2.02614100 | 2.30281900  | 1.33591800  |
| H  | -0.60137700 | 2.73432900  | 2.88618500  |
| C  | -3.01638500 | 2.91356000  | 0.49649200  |
| H  | -3.88228100 | 4.74897800  | -0.22025800 |
| O  | -1.77175100 | 1.03077500  | 1.38031700  |
| C  | -3.99207400 | 2.13746200  | -0.20743900 |
| Co | -2.66890400 | -0.32359300 | 0.37622600  |
| N  | -4.03374200 | 0.85072600  | -0.26005700 |
| H  | -4.78478500 | 2.70451500  | -0.69651400 |
| N  | -3.51961800 | -1.64227700 | -0.71743100 |
| C  | -5.14322100 | 0.11103000  | -0.86834900 |
| C  | -3.29879900 | -2.91194700 | -0.65986600 |
| C  | -4.49295200 | -1.04651400 | -1.64081800 |
| C  | -6.10323100 | 0.90428100  | -1.75328300 |
| H  | -3.89708400 | -3.57327100 | -1.28707000 |
| C  | -2.31389500 | -3.54926900 | 0.15640500  |
| C  | -5.54652700 | -1.98514700 | -2.22923400 |
| C  | -7.16509500 | -0.03331000 | -2.34608300 |
| H  | -5.54130200 | 1.39092200  | -2.56211600 |
| H  | -6.59251300 | 1.69413500  | -1.17394200 |
| C  | -2.27106400 | -4.96321500 | 0.15431300  |
| C  | -1.35522900 | -2.80074100 | 0.91238300  |
| C  | -6.52434900 | -1.19581900 | -3.11212800 |
| H  | -5.07282600 | -2.77292600 | -2.82426700 |
| H  | -6.08980900 | -2.47472300 | -1.41058200 |
| H  | -7.83384300 | 0.53255300  | -3.00304700 |
| H  | -7.78516400 | -0.43226100 | -1.53273200 |
| C  | -1.32650600 | -5.66283800 | 0.87625900  |
| H  | -3.01110600 | -5.49788100 | -0.43699600 |
| C  | -0.39895500 | -3.55240500 | 1.64660400  |
| O  | -1.27663800 | -1.49954000 | 0.92952700  |
| H  | -5.98468000 | -0.80216500 | -3.98398500 |
| H  | -7.29666900 | -1.86850900 | -3.49936900 |
| C  | -0.38566300 | -4.93356700 | 1.62852400  |
| H  | -1.31016000 | -6.74702800 | 0.86858100  |
| H  | 0.31170100  | -3.00020600 | 2.24156200  |
| H  | 0.36114800  | -5.46381300 | 2.21427400  |
| H  | -5.69772400 | -0.32929300 | -0.02903800 |
| H  | -3.91031700 | -0.59966900 | -2.45930200 |
| H  | 3.44843000  | 0.61498200  | 2.77762100  |
| H  | 1.20982700  | -0.97132700 | 1.48790500  |
| Cl | -3.95771300 | -0.88856200 | 2.12553800  |

**PO-Co<sup>III</sup>-Cl + H<sub>2</sub>O-Co<sup>III</sup>-OH bimetallic PO ring-opening in the terminal carbon**

PO-Co<sup>III</sup>-Cl + H<sub>2</sub>O-Co<sup>III</sup>-OH = Cl-Co<sup>III</sup>-PO-OH-Co<sup>III</sup>-H<sub>2</sub>O

Charge: 0

Spin Multiplicity: 1

Sum of electronic and thermal Free Energies (a.u.): -3163.803624

Thermal correction to Gibbs Free Energy (a.u.): 0.789915



No imaginary frequency

Calculation of single point energy based on the optimized structure,  $E_p = -5641.0130897$  a.u.

|    |             |             |             |
|----|-------------|-------------|-------------|
| C  | 4.94802000  | -3.57391000 | -3.08786000 |
| C  | 4.13174300  | -4.43970500 | -2.33776600 |
| C  | 5.11096900  | -2.24569300 | -2.72821500 |
| H  | 5.45429100  | -3.94798000 | -3.97344500 |
| C  | 3.49949900  | -3.94987700 | -1.21126700 |
| H  | 4.00334800  | -5.47357800 | -2.63835100 |
| C  | 4.45726200  | -1.71359300 | -1.59450500 |
| H  | 5.73135000  | -1.57414400 | -3.31207000 |
| C  | 3.64903200  | -2.60040200 | -0.81795900 |
| H  | 2.86102500  | -4.59369200 | -0.61130200 |
| O  | 4.64536100  | -0.44405700 | -1.29466100 |
| C  | 3.00677700  | -2.17959400 | 0.39149600  |
| Co | 3.42135500  | 0.54964100  | -0.23355700 |
| N  | 2.96182000  | -0.96418700 | 0.83253000  |
| H  | 2.49274600  | -2.95179600 | 0.96652300  |
| N  | 2.35033500  | 1.53225600  | 0.98936500  |
| C  | 2.16715600  | -0.62985200 | 2.03110600  |
| C  | 1.72818500  | 2.62902900  | 0.72278900  |
| C  | 2.34066800  | 0.86527400  | 2.29562600  |
| C  | 2.53300400  | -1.39569000 | 3.30552800  |
| H  | 1.03991600  | 3.03975700  | 1.45943600  |
| C  | 1.88845100  | 3.36779400  | -0.50035600 |
| C  | 1.31779800  | 1.31757700  | 3.33267000  |
| C  | 1.56142300  | -0.97667000 | 4.42231700  |
| H  | 3.56878000  | -1.15849900 | 3.58215500  |
| H  | 2.48619500  | -2.47594200 | 3.14383300  |
| C  | 0.98683200  | 4.41893400  | -0.77242600 |
| C  | 2.95412800  | 3.08244800  | -1.40696100 |
| C  | 1.56460800  | 0.54344000  | 4.63970100  |
| H  | 1.41032200  | 2.39235600  | 3.52442900  |
| H  | 0.31018900  | 1.11868600  | 2.95046900  |
| H  | 1.81978200  | -1.49122600 | 5.35360600  |
| H  | 0.54691400  | -1.29291400 | 4.15165100  |
| C  | 1.11501300  | 5.18611200  | -1.91638300 |
| H  | 0.17216400  | 4.59760600  | -0.07685300 |
| C  | 3.07197200  | 3.89174200  | -2.55759600 |
| O  | 3.83817600  | 2.11071800  | -1.22493100 |
| H  | 2.53211500  | 0.84967400  | 5.06098100  |
| H  | 0.79924000  | 0.81597800  | 5.37272400  |
| C  | 2.16998000  | 4.91759900  | -2.80326700 |
| H  | 0.40702900  | 5.98023100  | -2.12574300 |
| H  | 3.88517400  | 3.67734200  | -3.24299600 |
| H  | 2.28116000  | 5.51478400  | -3.70398800 |
| O  | 2.04637600  | 0.14419500  | -1.50587200 |
| H  | 2.10664900  | 0.78970600  | -2.22494700 |
| O  | 5.07187600  | 0.98624000  | 0.77408000  |
| H  | 5.21669100  | 1.84803500  | 0.33537000  |
| H  | 5.62415000  | 0.35764100  | 0.26401600  |
| C  | -0.38768000 | 0.79043800  | -1.27401600 |
| C  | 0.65865700  | -0.32231100 | -1.34157000 |
| O  | -1.61769400 | 0.16727800  | -1.19913500 |
| H  | -0.17875800 | 1.40761300  | -0.38983000 |
| H  | 0.63748500  | -0.90174400 | -0.42609200 |
| H  | 0.45559600  | -0.97855900 | -2.19315500 |
| C  | -0.37018900 | 1.68444800  | -2.52032700 |
| H  | -1.12092800 | 2.46949500  | -2.40313900 |
| H  | 0.59309400  | 2.18029200  | -2.69372300 |
| H  | -0.62965900 | 1.08803000  | -3.40194800 |
| C  | -1.61232500 | 4.68932300  | 1.92237700  |
| C  | -2.53635300 | 5.14765100  | 0.96578500  |
| C  | -1.37596700 | 3.33758800  | 2.10023200  |
| H  | -1.08070600 | 5.40606800  | 2.54402700  |
| C  | -3.26370800 | 4.20377600  | 0.26222600  |
| H  | -2.71296300 | 6.20822500  | 0.82426800  |
| C  | -2.02887600 | 2.34050000  | 1.31099400  |
| H  | -0.70029600 | 2.99754000  | 2.87368700  |
| C  | -3.05506200 | 2.81862600  | 0.42628200  |

|    |             |             |             |
|----|-------------|-------------|-------------|
| H  | -4.03996700 | 4.52425000  | -0.42975300 |
| O  | -1.67873400 | 1.10173300  | 1.43989500  |
| C  | -3.98659700 | 1.92405800  | -0.20317800 |
| Co | -2.42086700 | -0.36387700 | 0.43157400  |
| N  | -3.93002300 | 0.64241900  | -0.16342400 |
| H  | -4.83084900 | 2.39904800  | -0.70462300 |
| N  | -3.14834000 | -1.78226000 | -0.63553600 |
| C  | -4.96121900 | -0.22370500 | -0.73326300 |
| C  | -2.72291800 | -2.99332700 | -0.67484200 |
| C  | -4.19716900 | -1.28984300 | -1.53502600 |
| C  | -6.04023600 | 0.44961600  | -1.57885600 |
| H  | -3.20279700 | -3.69701200 | -1.35638300 |
| C  | -1.66523600 | -3.53445300 | 0.13044200  |
| C  | -5.14759100 | -2.33997400 | -2.11285100 |
| C  | -7.00051000 | -0.60632500 | -2.14313500 |
| H  | -5.57100400 | 1.00023100  | -2.40573600 |
| H  | -6.59695700 | 1.17564200  | -0.97663700 |
| C  | -1.41893000 | -4.92066900 | 0.04002400  |
| C  | -0.88386300 | -2.71968500 | 1.01313300  |
| C  | -6.24593200 | -1.66836100 | -2.94982500 |
| H  | -4.60155100 | -3.05338900 | -2.73893300 |
| H  | -5.59791300 | -2.90744200 | -1.28794300 |
| H  | -7.76092600 | -0.12345000 | -2.76641600 |
| H  | -7.53239600 | -1.08965700 | -1.31314400 |
| C  | -0.46549200 | -5.55165100 | 0.81879400  |
| H  | -2.01503900 | -5.50056400 | -0.66155200 |
| C  | 0.02713600  | -3.41377700 | 1.86006200  |
| O  | -0.92968000 | -1.42184000 | 1.06154800  |
| H  | -5.78950800 | -1.19614000 | -3.83040100 |
| H  | -6.94035700 | -2.42766400 | -3.32541800 |
| C  | 0.23897700  | -4.77759000 | 1.75759100  |
| H  | -0.29614500 | -6.61972500 | 0.73703600  |
| H  | 0.52700700  | -2.83789900 | 2.62411400  |
| H  | 0.94656200  | -5.25720300 | 2.43033400  |
| H  | -5.42411700 | -0.72842500 | 0.12464300  |
| H  | -3.67361100 | -0.76891300 | -2.34801600 |
| H  | 3.35283800  | 1.01904500  | 2.69578200  |
| H  | 1.11020200  | -0.80426400 | 1.78369700  |
| Cl | -3.66466800 | -1.08286600 | 2.24464800  |

#### subsequent hydration

Cl-Co<sup>III</sup>-PO-OH-Co<sup>III</sup>-H<sub>2</sub>O + H<sub>2</sub>O = PG + Co<sup>III</sup>(salen)-Cl + H<sub>2</sub>O-Co<sup>III</sup>-OH

Charge: 0

Spin Multiplicity: 1

Sum of electronic and thermal Free Energies (a.u.): -3240.190375

Thermal correction to Gibbs Free Energy (a.u.): 0.810455

Imaginary frequencies: -470.02

Calculation of single point energy based on the optimized structure, Et = -5717.4517929 a.u.

|    |            |             |             |
|----|------------|-------------|-------------|
| C  | 5.26769800 | -3.62601200 | -3.00508800 |
| C  | 4.44402200 | -4.51529600 | -2.28937900 |
| C  | 5.38198700 | -2.29779300 | -2.63435800 |
| H  | 5.82057000 | -3.98476600 | -3.86896400 |
| C  | 3.75228000 | -4.04113900 | -1.19273000 |
| H  | 4.35717000 | -5.55256000 | -2.59327900 |
| C  | 4.66976800 | -1.77993100 | -1.52455200 |
| H  | 6.01126100 | -1.60863900 | -3.18770900 |
| C  | 3.84512700 | -2.68901000 | -0.78851900 |
| H  | 3.11230800 | -4.70676500 | -0.61826300 |
| O  | 4.81863900 | -0.51108100 | -1.22307600 |
| C  | 3.12032600 | -2.28925400 | 0.38236700  |
| Co | 3.63214300 | 0.46680100  | -0.10139200 |
| N  | 3.03956800 | -1.08575200 | 0.84404200  |
| H  | 2.58008800 | -3.08110500 | 0.90564500  |
| N  | 2.54337100 | 1.42906200  | 1.11186800  |
| C  | 2.16617800 | -0.77503700 | 1.99120700  |
| C  | 1.95205400 | 2.53954500  | 0.83051500  |
| C  | 2.40272900 | 0.69161700  | 2.36663600  |
| C  | 2.37497700 | -1.63469400 | 3.24258900  |
| H  | 1.21953900 | 2.94182200  | 1.52702300  |
| C  | 2.20849100 | 3.30289700  | -0.35919800 |

|    |             |             |             |
|----|-------------|-------------|-------------|
| C  | 1.33369900  | 1.14080000  | 3.35787000  |
| C  | 1.34316800  | -1.22324600 | 4.30602700  |
| H  | 3.39696000  | -1.47890600 | 3.61185100  |
| H  | 2.28399600  | -2.70153700 | 3.01820700  |
| C  | 1.33581800  | 4.36301300  | -0.68194100 |
| C  | 3.35232200  | 3.03690000  | -1.17498300 |
| C  | 1.42799400  | 0.27585300  | 4.62623800  |
| H  | 1.47340100  | 2.19520000  | 3.62147300  |
| H  | 0.34712100  | 1.02704200  | 2.89531000  |
| H  | 1.49166200  | -1.81313000 | 5.21653800  |
| H  | 0.33653700  | -1.45253400 | 3.93620300  |
| C  | 1.55938600  | 5.15490300  | -1.79450000 |
| H  | 0.46987600  | 4.53497400  | -0.05000100 |
| C  | 3.56708800  | 3.87432700  | -2.29138000 |
| O  | 4.22167400  | 2.07728600  | -0.91957000 |
| H  | 2.37782700  | 0.48676100  | 5.13655800  |
| H  | 0.62709600  | 0.55461700  | 5.31797200  |
| C  | 2.68764700  | 4.90409600  | -2.59280300 |
| H  | 0.87318000  | 5.95655600  | -2.04497200 |
| H  | 4.43703600  | 3.67567100  | -2.90860000 |
| H  | 2.87506400  | 5.52138300  | -3.46735100 |
| O  | 2.26758900  | 0.35348700  | -1.34393100 |
| H  | 2.75062400  | 0.33905800  | -2.18240200 |
| O  | 5.30013600  | 0.75271900  | 1.03670200  |
| H  | 5.44928800  | 1.63928100  | 0.65152600  |
| H  | 5.85461900  | 0.16200300  | 0.49307200  |
| C  | -0.31464400 | 0.52323300  | -1.37997500 |
| C  | 0.58645300  | -0.70116000 | -1.68601400 |
| O  | -1.66958200 | 0.13501900  | -1.30719300 |
| H  | 0.01671800  | 0.90280400  | -0.41170600 |
| H  | 0.85706000  | -1.37155500 | -0.88820200 |
| H  | 1.00623400  | -0.87444800 | -2.66308700 |
| C  | -0.18483500 | 1.60594000  | -2.44952800 |
| H  | -0.80626800 | 2.45774300  | -2.16316900 |
| H  | 0.84663100  | 1.94516900  | -2.55220700 |
| H  | -0.54527900 | 1.22530300  | -3.41181500 |
| C  | -1.30080000 | 4.73237400  | 1.95330300  |
| C  | -2.17462200 | 5.29501600  | 1.00411000  |
| C  | -1.15644600 | 3.36223800  | 2.07244300  |
| H  | -0.73422300 | 5.38303400  | 2.61482500  |
| C  | -2.95319600 | 4.43692000  | 0.25126500  |
| H  | -2.27427000 | 6.37036600  | 0.90738000  |
| C  | -1.85430900 | 2.45033400  | 1.22465500  |
| H  | -0.51845600 | 2.94380200  | 2.83821800  |
| C  | -2.84118300 | 3.03310800  | 0.36100300  |
| H  | -3.69918200 | 4.83790300  | -0.43161800 |
| O  | -1.57646600 | 1.18550500  | 1.28781000  |
| C  | -3.85199800 | 2.23551000  | -0.26673200 |
| Co | -2.53303600 | -0.20777500 | 0.37653300  |
| N  | -3.92914900 | 0.95271700  | -0.21869300 |
| H  | -4.65234900 | 2.78981900  | -0.75775800 |
| N  | -3.51296900 | -1.57539500 | -0.55502900 |
| C  | -5.09296900 | 0.21135200  | -0.70899100 |
| C  | -3.33156400 | -2.84329600 | -0.43546800 |
| C  | -4.52433700 | -1.00497900 | -1.45130200 |
| C  | -6.08963500 | 0.97854100  | -1.57680900 |
| H  | -3.99806600 | -3.52214900 | -0.96771200 |
| C  | -2.28652300 | -3.46478300 | 0.32462400  |
| C  | -5.63189400 | -1.94515200 | -1.92600000 |
| C  | -7.20797300 | 0.03878500  | -2.04970700 |
| H  | -5.56901400 | 1.40401300  | -2.44548700 |
| H  | -6.52260500 | 1.81220500  | -1.01420300 |
| C  | -2.27579800 | -4.87848400 | 0.38304200  |
| C  | -1.24815200 | -2.70650000 | 0.96517600  |
| C  | -6.64250300 | -1.17768900 | -2.79054800 |
| H  | -5.21153300 | -2.77399500 | -2.50532100 |
| H  | -6.13766300 | -2.37736400 | -1.05259800 |
| H  | -7.90478900 | 0.58614800  | -2.69325700 |
| H  | -7.78353100 | -0.30147100 | -1.17885700 |

|    |             |             |             |
|----|-------------|-------------|-------------|
| C  | -1.29552400 | -5.57645000 | 1.05806300  |
| H  | -3.07462100 | -5.41573900 | -0.12324700 |
| C  | -0.26436400 | -3.46221200 | 1.66420500  |
| O  | -1.12684600 | -1.41382000 | 0.91076300  |
| H  | -6.14683900 | -0.84331300 | -3.71178700 |
| H  | -7.45209200 | -1.84903000 | -3.09566800 |
| C  | -0.28582000 | -4.84250300 | 1.70844800  |
| H  | -1.30750700 | -6.65998300 | 1.09507000  |
| H  | 0.49316800  | -2.90832700 | 2.19441600  |
| H  | 0.48621800  | -5.36679300 | 2.26657900  |
| Cl | -3.73094900 | -0.65971800 | 2.27015100  |
| O  | -0.87393500 | -1.89896800 | -2.26368700 |
| H  | -0.91562000 | -2.58617100 | -1.58187200 |
| H  | -1.48411600 | -1.10648800 | -1.89365800 |
| H  | -3.97485500 | -0.62190400 | -2.32301900 |
| H  | -5.60059200 | -0.16322500 | 0.18993500  |
| H  | 1.12626400  | -0.86379200 | 1.64517500  |
| H  | 3.39001500  | 0.75280800  | 2.84590400  |

**subsequent hydration**

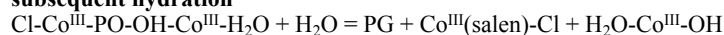

Charge: 0

Spin Multiplicity: 1

Sum of electronic and thermal Free Energies (a.u.): -3240.230225

Thermal correction to Gibbs Free Energy (a.u.): 0.811920

No imaginary frequency

Calculation of single point energy based on the optimized structure, Er = -5717.5017539 a.u.

|    |            |             |             |
|----|------------|-------------|-------------|
| C  | 4.83521100 | -3.74141200 | -3.03356100 |
| C  | 4.04165400 | -4.57472800 | -2.22481400 |
| C  | 5.01827800 | -2.40315200 | -2.72555600 |
| H  | 5.30757500 | -4.14893100 | -3.92289800 |
| C  | 3.45218600 | -4.04060300 | -1.09597200 |
| H  | 3.89608100 | -5.61733800 | -2.48402000 |
| C  | 4.40789100 | -1.82655600 | -1.58857600 |
| H  | 5.62183800 | -1.75629000 | -3.35342600 |
| C  | 3.62202300 | -2.67896300 | -0.75314100 |
| H  | 2.83261500 | -4.65939500 | -0.45173900 |
| O  | 4.60335600 | -0.54133900 | -1.35719900 |
| C  | 3.01244900 | -2.21475300 | 0.45860700  |
| Co | 3.51626700 | 0.50293700  | -0.20563500 |
| N  | 3.00340100 | -0.99071300 | 0.87410200  |
| H  | 2.49178600 | -2.96455500 | 1.05651500  |
| N  | 2.49470000 | 1.52749400  | 1.01714200  |
| C  | 2.23295200 | -0.61462200 | 2.07678400  |
| C  | 1.86681300 | 2.61145100  | 0.70824200  |
| C  | 2.46559400 | 0.87644100  | 2.32852900  |
| C  | 2.57178900 | -1.38418700 | 3.35650900  |
| H  | 1.17184400 | 3.04346700  | 1.42614700  |
| C  | 2.03185900 | 3.30263600  | -0.54047500 |
| C  | 1.46114400 | 1.37353500  | 3.36298200  |
| C  | 1.61643500 | -0.92052600 | 4.46964900  |
| H  | 3.61593000 | -1.18348500 | 3.62997500  |
| H  | 2.48557500 | -2.46393800 | 3.20613100  |
| C  | 1.12007900 | 4.32818300  | -0.86945600 |
| C  | 3.11999100 | 2.99891000  | -1.41433400 |
| C  | 1.67755100 | 0.60022700  | 4.67581500  |
| H  | 1.59140900 | 2.44632800  | 3.54337400  |
| H  | 0.44736700 | 1.20640800  | 2.98252200  |
| H  | 1.85555400 | -1.43738000 | 5.40471700  |
| H  | 0.59141300 | -1.20263300 | 4.20035000  |
| C  | 1.25955700 | 5.05002900  | -2.04148400 |
| H  | 0.29251900 | 4.52674400  | -0.19523400 |
| C  | 3.24995600 | 3.76340400  | -2.59187000 |
| O  | 4.01922800 | 2.05880400  | -1.16156600 |
| H  | 2.65567400 | 0.87218900  | 5.09589700  |
| H  | 0.92266300 | 0.90679300  | 5.40620700  |
| C  | 2.33664200 | 4.76362900  | -2.89576300 |
| H  | 0.54427400 | 5.82406900  | -2.29641800 |
| H  | 4.07946700 | 3.53582700  | -3.25296200 |
| H  | 2.45593700 | 5.32620800  | -3.81753700 |

|    |             |             |             |
|----|-------------|-------------|-------------|
| O  | 2.06476700  | 0.30836100  | -1.42485900 |
| H  | 2.45019400  | 0.10277500  | -2.28714000 |
| O  | 5.20596800  | 0.85270700  | 0.77040000  |
| H  | 5.35158400  | 1.71830200  | 0.33513200  |
| H  | 5.75143300  | 0.22632100  | 0.25616500  |
| C  | -0.36535000 | 0.75336000  | -1.33124900 |
| C  | 0.73740300  | -0.30479000 | -1.25659400 |
| O  | -1.57777900 | 0.07867800  | -1.19404700 |
| H  | -0.20717400 | 1.46191900  | -0.51037100 |
| H  | 0.71002600  | -0.78687000 | -0.28546000 |
| H  | 0.61008400  | -1.05025100 | -2.04393800 |
| C  | -0.34865700 | 1.51595900  | -2.65684600 |
| H  | -1.14146900 | 2.26849400  | -2.64929700 |
| H  | 0.60558400  | 2.02715400  | -2.81958600 |
| H  | -0.53574200 | 0.82564300  | -3.48688900 |
| C  | -1.35050500 | 4.80162800  | 1.91326400  |
| C  | -2.24186900 | 5.29573200  | 0.94362700  |
| C  | -1.16777300 | 3.44165700  | 2.09202400  |
| H  | -0.80121500 | 5.49686100  | 2.54358100  |
| C  | -2.99729100 | 4.38135900  | 0.23128200  |
| H  | -2.37453700 | 6.36235400  | 0.80019200  |
| C  | -1.84321400 | 2.47211500  | 1.28869100  |
| H  | -0.51713900 | 3.07595600  | 2.87482500  |
| C  | -2.84530000 | 2.98899300  | 0.39955100  |
| H  | -3.75436200 | 4.73127300  | -0.46747400 |
| O  | -1.52684800 | 1.22167200  | 1.40142700  |
| C  | -3.82308600 | 2.13322100  | -0.21181300 |
| Co | -2.40953500 | -0.23746700 | 0.49853100  |
| N  | -3.84699900 | 0.85173300  | -0.13288200 |
| H  | -4.64044000 | 2.64295700  | -0.72315800 |
| N  | -3.30558700 | -1.66041700 | -0.41897900 |
| C  | -4.96454500 | 0.04591400  | -0.63032900 |
| C  | -2.99793400 | -2.90597800 | -0.36520500 |
| C  | -4.32256300 | -1.15023800 | -1.34351200 |
| C  | -5.98282300 | 0.75064800  | -1.52454300 |
| H  | -3.57972300 | -3.61448600 | -0.95425400 |
| C  | -1.92539400 | -3.47008000 | 0.40372500  |
| C  | -5.37106300 | -2.15133200 | -1.82769500 |
| C  | -7.04572400 | -0.25112400 | -1.99773500 |
| H  | -5.46988700 | 1.18535100  | -2.39326400 |
| H  | -6.46443200 | 1.57185600  | -0.98300700 |
| C  | -1.78594300 | -4.87590200 | 0.39442500  |
| C  | -1.00751700 | -2.65955000 | 1.15124000  |
| C  | -6.40770600 | -1.44610300 | -2.71418700 |
| H  | -4.89371600 | -2.95363000 | -2.39884300 |
| H  | -5.86503400 | -2.60795800 | -0.95980600 |
| H  | -7.76153800 | 0.25110200  | -2.65742200 |
| H  | -7.61404800 | -0.60857200 | -1.12887500 |
| C  | -0.80341600 | -5.52321400 | 1.11963900  |
| H  | -2.48825900 | -5.45369500 | -0.20256000 |
| C  | -0.05178900 | -3.36428100 | 1.93909500  |
| O  | -0.97445400 | -1.36219500 | 1.13433200  |
| H  | -5.91577200 | -1.09755100 | -3.63204900 |
| H  | -7.17777400 | -2.16126200 | -3.02275900 |
| C  | 0.05378000  | -4.74294200 | 1.91634100  |
| H  | -0.71664700 | -6.60393400 | 1.10041600  |
| H  | 0.57161800  | -2.77778400 | 2.59668800  |
| H  | 0.79969800  | -5.22880500 | 2.54150500  |
| Cl | -3.63065200 | -0.70314500 | 2.39191900  |
| O  | -1.36281600 | -2.07756700 | -2.83260600 |
| H  | -1.13009100 | -2.76261700 | -2.19327900 |
| H  | -1.51850900 | -1.28728600 | -2.25580700 |
| H  | -3.76873600 | -0.76305300 | -2.20885800 |
| H  | -5.46622500 | -0.33780700 | 0.26794300  |
| H  | 1.16791800  | -0.74829700 | 1.83823300  |
| H  | 3.48349000  | 0.99359200  | 2.72637100  |

**subsequent hydration**

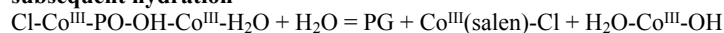

Charge: 0

Spin Multiplicity: 1

Sum of electronic and thermal Free Energies (a.u.): -3240.256182

Thermal correction to Gibbs Free Energy (a.u.): 0.813705

No imaginary frequency

Calculation of single point energy based on the optimized structure, Ep = - 5717.515657 a.u.

|    |             |             |             |
|----|-------------|-------------|-------------|
| C  | 7.14078900  | -2.74876000 | -1.53179200 |
| C  | 6.69433600  | -3.67197800 | -0.56749800 |
| C  | 6.57988000  | -1.48848600 | -1.62956900 |
| H  | 7.93692300  | -3.02979400 | -2.21591900 |
| C  | 5.67855500  | -3.29503700 | 0.28855500  |
| H  | 7.13768200  | -4.65943300 | -0.50108600 |
| C  | 5.53400600  | -1.07640300 | -0.76453500 |
| H  | 6.91705000  | -0.77556900 | -2.37472500 |
| C  | 5.08324300  | -2.01401600 | 0.21611800  |
| H  | 5.31218900  | -3.98924500 | 1.04140000  |
| O  | 5.05917700  | 0.13827300  | -0.90158400 |
| C  | 4.00970200  | -1.72518500 | 1.12516500  |
| Co | 3.56011500  | 0.86994000  | 0.01497100  |
| N  | 3.33832800  | -0.62639300 | 1.18077900  |
| H  | 3.72980900  | -2.53543700 | 1.79805000  |
| N  | 2.17890500  | 1.67058900  | 1.04254900  |
| C  | 2.12089700  | -0.49465600 | 1.99818600  |
| C  | 1.39638100  | 2.59551000  | 0.60832700  |
| C  | 2.00243300  | 0.99333300  | 2.33753500  |
| C  | 2.01684900  | -1.39235500 | 3.22806200  |
| H  | 0.54843500  | 2.88956300  | 1.21740200  |
| C  | 1.55453900  | 3.29072700  | -0.63842300 |
| C  | 0.70766500  | 1.27976100  | 3.09175200  |
| C  | 0.71608700  | -1.08472700 | 3.98493300  |
| H  | 2.88984700  | -1.23455000 | 3.87708100  |
| H  | 2.01339700  | -2.44369600 | 2.92286800  |
| C  | 0.52278000  | 4.16082700  | -1.05174800 |
| C  | 2.74596400  | 3.16268600  | -1.41852400 |
| C  | 0.61813100  | 0.40056300  | 4.34718900  |
| H  | 0.66393900  | 2.33797300  | 3.37606800  |
| H  | -0.14464300 | 1.06177600  | 2.43922500  |
| H  | 0.66348700  | -1.70195000 | 4.88822800  |
| H  | -0.14212300 | -1.35640500 | 3.35908100  |
| C  | 0.61726900  | 4.87252900  | -2.23437100 |
| H  | -0.36112600 | 4.24983100  | -0.42453400 |
| C  | 2.81556200  | 3.90411900  | -2.62359600 |
| O  | 3.77583200  | 2.43784300  | -1.05416400 |
| H  | 1.42229200  | 0.66801800  | 5.04757800  |
| H  | -0.32982600 | 0.59957800  | 4.85679900  |
| C  | 1.77711700  | 4.73132200  | -3.01881600 |
| H  | -0.18445200 | 5.53230300  | -2.54846300 |
| H  | 3.71350200  | 3.79912700  | -3.22322600 |
| H  | 1.86294100  | 5.28102800  | -3.95231300 |
| O  | 2.37658900  | 0.13231400  | -1.18836900 |
| H  | 2.96344900  | -0.05942600 | -1.93464700 |
| O  | 5.00687000  | 1.80171300  | 1.16284200  |
| H  | 4.90975300  | 2.62147300  | 0.63988500  |
| H  | 5.74194700  | 1.33911800  | 0.72069200  |
| C  | -1.46144000 | 1.42249200  | -1.91932900 |
| C  | -0.36860400 | 1.14888900  | -2.96564100 |
| O  | -2.11498100 | 0.13535700  | -1.70074600 |
| H  | -0.99229700 | 1.70801000  | -0.97756000 |
| H  | 0.36271100  | 1.96416600  | -2.95321900 |
| H  | -0.81673200 | 1.09682600  | -3.96569400 |
| C  | -2.48427500 | 2.44945800  | -2.35516500 |
| H  | -3.22676300 | 2.62580100  | -1.57444400 |
| H  | -1.97878400 | 3.39695100  | -2.56487100 |
| H  | -2.99594600 | 2.11868300  | -3.26492900 |
| C  | -2.74181800 | 4.41710000  | 2.09602100  |
| C  | -4.10004900 | 4.53340400  | 1.74675700  |
| C  | -2.03590500 | 3.25248800  | 1.86184000  |
| H  | -2.23498900 | 5.25313500  | 2.57075900  |
| C  | -4.72309300 | 3.43531900  | 1.19224100  |
| H  | -4.64589400 | 5.45142900  | 1.93305800  |

|    |             |             |             |
|----|-------------|-------------|-------------|
| C  | -2.62932700 | 2.11871900  | 1.23454000  |
| H  | -1.00868300 | 3.17320500  | 2.18367500  |
| C  | -4.02652100 | 2.23090200  | 0.93609800  |
| H  | -5.78118800 | 3.47619700  | 0.94330000  |
| O  | -1.89068700 | 1.08343900  | 0.95970500  |
| C  | -4.78308200 | 1.12854800  | 0.43440200  |
| Co | -2.47436300 | -0.56589700 | 0.16480700  |
| N  | -4.31785700 | -0.03012800 | 0.11601500  |
| H  | -5.85651300 | 1.29743200  | 0.34818900  |
| N  | -3.10469100 | -2.17077000 | -0.66676400 |
| C  | -5.21437900 | -1.14869300 | -0.21297700 |
| C  | -2.49933300 | -3.31289100 | -0.62437900 |
| C  | -4.44879900 | -2.00662800 | -1.22387000 |
| C  | -6.60686700 | -0.78487500 | -0.73157400 |
| H  | -3.04040500 | -4.20120300 | -0.94980300 |
| C  | -1.12878200 | -3.50291000 | -0.28767900 |
| C  | -5.21644100 | -3.28062000 | -1.57419500 |
| C  | -7.38385700 | -2.05652000 | -1.10354400 |
| H  | -6.50724100 | -0.13367200 | -1.61041700 |
| H  | -7.16981200 | -0.22860700 | 0.02449300  |
| C  | -0.59793000 | -4.81507500 | -0.35209800 |
| C  | -0.25641200 | -2.38029800 | -0.12887100 |
| C  | -6.61103200 | -2.92076800 | -2.10543600 |
| H  | -4.67018600 | -3.86157400 | -2.32475000 |
| H  | -5.31205200 | -3.90838600 | -0.67844500 |
| H  | -8.36325000 | -1.78377200 | -1.51034400 |
| H  | -7.57293300 | -2.63991700 | -0.19275600 |
| C  | 0.76107000  | -5.04252900 | -0.32952800 |
| H  | -1.29320800 | -5.64601500 | -0.44873000 |
| C  | 1.13722200  | -2.63540900 | -0.26078700 |
| O  | -0.65676300 | -1.15172500 | 0.06333700  |
| H  | -6.50653700 | -2.37554500 | -3.05295900 |
| H  | -7.16967700 | -3.83543100 | -2.32955300 |
| C  | 1.62381000  | -3.92612800 | -0.33402000 |
| H  | 1.15794200  | -6.05093500 | -0.37512800 |
| H  | 1.78958800  | -1.77931600 | -0.37630200 |
| H  | 2.69684900  | -4.07585500 | -0.42819700 |
| Cl | -2.80098900 | -1.45780500 | 2.20629900  |
| O  | 0.22296800  | -0.10967500 | -2.70052900 |
| H  | 0.91819400  | 0.00834500  | -1.99682300 |
| H  | -1.36776300 | -0.47800900 | -1.93046400 |
| H  | -4.32744800 | -1.40377900 | -2.13565800 |
| H  | -5.30769000 | -1.73809000 | 0.70958200  |
| H  | 1.27691800  | -0.71382800 | 1.33395900  |
| H  | 2.86796500  | 1.27710000  | 2.95295100  |

PO-Co<sup>III</sup>-Cl + H<sub>2</sub>O-Co<sup>III</sup>-OH bimetallic PO ring-opening in the middle carbon and subsequent hydration

**PO-Co<sup>III</sup>-Cl + H<sub>2</sub>O-Co<sup>III</sup>-OH bimetallic PO ring-opening in the middle carbon**

PO-Co<sup>III</sup>-Cl + H<sub>2</sub>O-Co<sup>III</sup>-OH = Cl-Co<sup>III</sup>-PO-OH-Co<sup>III</sup>-H<sub>2</sub>O

Charge: 0

Spin Multiplicity: 1

Sum of electronic and thermal Free Energies (a.u.): -3163.775756

Thermal correction to Gibbs Free Energy (a.u.): 0.782596

Imaginary frequencies: -357.98

Calculation of single point energy based on the optimized structure, Et = -5640.9778283 a.u.

|    |             |             |             |
|----|-------------|-------------|-------------|
| C  | -7.07662000 | 1.88270500  | 3.11512700  |
| C  | -6.76968500 | 0.84797000  | 4.02066700  |
| C  | -6.48991900 | 1.93783900  | 1.86499900  |
| H  | -7.78453800 | 2.65497100  | 3.40370000  |
| C  | -5.86647700 | -0.12121900 | 3.63581500  |
| H  | -7.23426500 | 0.81596100  | 4.99999300  |
| C  | -5.55420700 | 0.95732700  | 1.44438100  |
| H  | -6.72121600 | 2.73456100  | 1.16588000  |
| C  | -5.24450100 | -0.09449500 | 2.36467100  |
| H  | -5.61314900 | -0.93159600 | 4.31567900  |
| O  | -5.05280200 | 1.05479500  | 0.24045100  |
| C  | -4.32462100 | -1.14625100 | 2.04922600  |
| Co | -3.59235300 | 0.03833200  | -0.44348500 |
| N  | -3.65245100 | -1.26954700 | 0.95365400  |

|    |             |             |             |
|----|-------------|-------------|-------------|
| H  | -4.18937700 | -1.90060700 | 2.82697400  |
| N  | -2.25986400 | -1.05327000 | -1.21738900 |
| C  | -2.62990200 | -2.31628800 | 0.78734600  |
| C  | -1.33466500 | -0.62884700 | -2.01327600 |
| C  | -2.36168100 | -2.42846600 | -0.72063100 |
| C  | -2.95157900 | -3.69238200 | 1.37583500  |
| H  | -0.53304700 | -1.30527000 | -2.29261100 |
| C  | -1.30652000 | 0.68458900  | -2.59589600 |
| C  | -1.19489600 | -3.36817200 | -1.00757600 |
| C  | -1.79509400 | -4.66473700 | 1.08977700  |
| H  | -3.88298300 | -4.06302000 | 0.92841300  |
| H  | -3.11491100 | -3.62912000 | 2.45634100  |
| C  | -0.14991900 | 1.08705200  | -3.30208500 |
| C  | -2.45420100 | 1.53638700  | -2.55441800 |
| C  | -1.47740800 | -4.75199100 | -0.40804200 |
| H  | -1.02167900 | -3.45476600 | -2.08252900 |
| H  | -0.27241500 | -2.96456300 | -0.57695900 |
| H  | -2.03947900 | -5.65530300 | 1.48767800  |
| H  | -0.90092500 | -4.32168400 | 1.62783800  |
| C  | -0.12376300 | 2.28175800  | -3.99826600 |
| H  | 0.73730700  | 0.46809900  | -3.23476200 |
| C  | -2.39985500 | 2.74848200  | -3.27865100 |
| O  | -3.56526800 | 1.23332200  | -1.91396800 |
| H  | -2.32663000 | -5.21034700 | -0.93254100 |
| H  | -0.61105300 | -5.39841000 | -0.57886300 |
| C  | -1.26403100 | 3.10370100  | -3.98975700 |
| H  | 0.77443000  | 2.58708900  | -4.52325100 |
| H  | -3.27718300 | 3.38642500  | -3.25610700 |
| H  | -1.25258100 | 4.04430900  | -4.53423900 |
| O  | -2.36364000 | 1.01726300  | 0.52394600  |
| H  | -2.70155000 | 1.91769500  | 0.41308900  |
| O  | -5.06761200 | -0.85546100 | -1.57850000 |
| H  | -4.85419600 | -0.26809100 | -2.33102600 |
| H  | -5.78596900 | -0.38150600 | -1.12006900 |
| C  | -0.19520300 | 1.25821900  | 0.66643300  |
| C  | 0.20629500  | -0.07118700 | 1.11334600  |
| O  | 1.47952700  | 0.54148000  | 1.14220900  |
| H  | -0.06027800 | 1.45147300  | -0.38904100 |
| H  | 0.11354600  | -0.86594400 | 0.37390000  |
| H  | -0.14217200 | -0.37999400 | 2.10579800  |
| C  | -0.34814000 | 2.41751500  | 1.59561800  |
| H  | -1.01393600 | 3.16459700  | 1.15806200  |
| H  | -0.73992800 | 2.10375900  | 2.56569900  |
| H  | 0.62347800  | 2.89975200  | 1.72916000  |
| C  | 1.45380800  | 5.28721700  | -0.78842500 |
| C  | 2.25304000  | 5.68255600  | 0.30437900  |
| C  | 1.46435200  | 3.98825600  | -1.25466400 |
| H  | 0.81318100  | 6.01825600  | -1.27548100 |
| C  | 3.05580100  | 4.73642200  | 0.90701700  |
| H  | 2.23885400  | 6.70745000  | 0.65897100  |
| C  | 2.27555400  | 2.98583400  | -0.64813300 |
| H  | 0.84803700  | 3.68366300  | -2.09156300 |
| C  | 3.08142900  | 3.39103500  | 0.46745400  |
| H  | 3.68610100  | 5.01274500  | 1.74986900  |
| O  | 2.22448000  | 1.78144300  | -1.12677700 |
| C  | 3.93240100  | 2.47484900  | 1.16518100  |
| Co | 2.83914300  | 0.24373900  | -0.21168300 |
| N  | 3.97712600  | 1.20144100  | 0.97532400  |
| H  | 4.58498500  | 2.91287700  | 1.92165700  |
| N  | 3.35884700  | -1.31233900 | 0.78460600  |
| Cl | 4.60674000  | -0.03696800 | -1.61611600 |
| C  | 4.87177200  | 0.30092700  | 1.70264500  |
| C  | 3.18937600  | -2.53380500 | 0.41169700  |
| C  | 4.01827800  | -0.93816400 | 2.04023300  |
| C  | 5.54983000  | 0.86593900  | 2.94992000  |
| H  | 3.55855400  | -3.33613500 | 1.05236100  |
| C  | 2.58408700  | -2.94467300 | -0.82331900 |
| C  | 4.85101700  | -2.02145400 | 2.72491500  |
| C  | 6.38893300  | -0.22155800 | 3.63542700  |



|   |             |             |             |
|---|-------------|-------------|-------------|
| H | 4.78588400  | 1.24036800  | 3.64488900  |
| H | 6.19045600  | 1.71283000  | 2.68281100  |
| C | 2.63094800  | -4.31307900 | -1.16627600 |
| C | 1.96463900  | -2.00411300 | -1.70929500 |
| C | 5.54194400  | -1.45343600 | 3.97306500  |
| H | 4.21986900  | -2.87038000 | 3.00986000  |
| H | 5.60341400  | -2.39677100 | 2.01902400  |
| H | 6.85104700  | 0.18240000  | 4.54243700  |
| H | 7.20910200  | -0.51710400 | 2.96814100  |
| C | 2.14062200  | -4.77651000 | -2.37365300 |
| H | 3.08574200  | -5.00607700 | -0.46151400 |
| C | 1.53810800  | -2.49855400 | -2.97316700 |
| O | 1.72007600  | -0.76521600 | -1.39452700 |
| H | 4.77890500  | -1.17681700 | 4.71324300  |
| H | 6.16235400  | -2.22787900 | 4.43647500  |
| C | 1.61620900  | -3.84352300 | -3.28769200 |
| H | 2.19412500  | -5.82961000 | -2.62718100 |
| H | 1.15517400  | -1.78231600 | -3.69183200 |
| H | 1.27328100  | -4.18155300 | -4.26210100 |
| H | 5.63389100  | -0.01779700 | 0.97971800  |
| H | 3.22244700  | -0.60076000 | 2.71873600  |
| H | -3.27285300 | -2.84290600 | -1.17532600 |
| H | -1.71279400 | -1.93747200 | 1.25635100  |

**PO-Co<sup>III</sup>-Cl + H<sub>2</sub>O-Co<sup>III</sup>-OH bimetallic PO ring-opening in the middle carbon**

PO-Co<sup>III</sup>-Cl + H<sub>2</sub>O-Co<sup>III</sup>-OH = Cl-Co<sup>III</sup>-PO-OH-Co<sup>III</sup>-H<sub>2</sub>O

Charge: 0

Spin Multiplicity: 1

Sum of electronic and thermal Free Energies (a.u.): -3163.796505

Thermal correction to Gibbs Free Energy (a.u.): 0.780116

No imaginary frequency

Calculation of single point energy based on the optimized structure, Er = -5640.9985203 a.u.

|    |             |             |             |
|----|-------------|-------------|-------------|
| C  | 7.49822600  | -1.64135300 | 3.35024800  |
| C  | 7.54601300  | -0.29131900 | 3.75122000  |
| C  | 6.64760300  | -2.05998400 | 2.34531100  |
| H  | 8.13858700  | -2.36932400 | 3.84118100  |
| C  | 6.72005700  | 0.61506400  | 3.11913800  |
| H  | 8.21543000  | 0.02601600  | 4.54320800  |
| C  | 5.78953100  | -1.14842100 | 1.67364000  |
| H  | 6.60478700  | -3.09907800 | 2.03605800  |
| C  | 5.83827700  | 0.22246000  | 2.08412000  |
| H  | 6.73292200  | 1.66220300  | 3.41358600  |
| O  | 5.02829100  | -1.60733200 | 0.71605600  |
| C  | 4.99823200  | 1.22844900  | 1.50340500  |
| Co | 3.75785400  | -0.61492100 | -0.29542600 |
| N  | 4.15578500  | 1.05153900  | 0.54237200  |
| H  | 5.08583900  | 2.22367100  | 1.94226600  |
| N  | 2.60982300  | 0.38807400  | -1.43560800 |
| C  | 3.21034400  | 2.09445200  | 0.12089600  |
| C  | 1.61686400  | -0.09779800 | -2.10394700 |
| C  | 2.91593900  | 1.82021600  | -1.36279400 |
| C  | 3.63928500  | 3.54506800  | 0.34772400  |
| H  | 0.94532500  | 0.58616300  | -2.62284100 |
| C  | 1.32068300  | -1.49676800 | -2.22640500 |
| C  | 1.86843800  | 2.77878700  | -1.91967700 |
| C  | 2.58460400  | 4.50784900  | -0.21878900 |
| H  | 4.60628000  | 3.71506600  | -0.14423700 |
| H  | 3.77936300  | 3.74421700  | 1.41520000  |
| C  | 0.10628900  | -1.87226400 | -2.84410900 |
| C  | 2.23036400  | -2.49969100 | -1.76542500 |
| C  | 2.30645400  | 4.23146100  | -1.69961500 |
| H  | 1.70571900  | 2.59506800  | -2.98469500 |
| H  | 0.90602700  | 2.61017600  | -1.42331200 |
| H  | 2.91502300  | 5.54207900  | -0.07520700 |
| H  | 1.65090600  | 4.39325600  | 0.34860700  |
| C  | -0.23638600 | -3.20227700 | -3.00087100 |
| H  | -0.59227700 | -1.09505200 | -3.13486500 |
| C  | 1.85230400  | -3.85370500 | -1.94016900 |
| O  | 3.39801500  | -2.23541400 | -1.22947000 |
| H  | 3.21358200  | 4.43534300  | -2.28462200 |

|    |             |             |             |
|----|-------------|-------------|-------------|
| H  | 1.52588000  | 4.89963700  | -2.07402100 |
| C  | 0.65140700  | -4.19197600 | -2.54180400 |
| H  | -1.17842400 | -3.47335900 | -3.46373600 |
| H  | 2.54062900  | -4.61308500 | -1.58419100 |
| H  | 0.39019200  | -5.24102000 | -2.65294100 |
| O  | 2.40609500  | -0.86444400 | 0.90538900  |
| H  | 2.63892100  | -1.71862000 | 1.29690200  |
| O  | 5.30786900  | -0.51695800 | -1.70406100 |
| H  | 4.90472300  | -1.27361600 | -2.17379000 |
| H  | 5.95344800  | -0.94438600 | -1.11408600 |
| C  | -0.73799800 | -1.58296600 | 0.41108800  |
| C  | -0.29711900 | -0.25479800 | 0.80831500  |
| O  | -1.70603400 | -0.63021500 | 1.00005200  |
| H  | -0.94609900 | -1.73488300 | -0.63944100 |
| H  | -0.14932400 | 0.49473100  | 0.04166100  |
| H  | 0.24250800  | -0.12328400 | 1.73762700  |
| C  | -0.46415400 | -2.81201100 | 1.21999600  |
| H  | 0.44738900  | -3.27766600 | 0.83264000  |
| H  | -0.31799600 | -2.57030400 | 2.27634500  |
| H  | -1.28631100 | -3.52629700 | 1.12084300  |
| C  | -3.96057700 | -5.11167300 | -0.39938900 |
| C  | -4.66529200 | -5.10608000 | 0.82306900  |
| C  | -3.51997600 | -3.93945200 | -0.97874800 |
| H  | -3.75987500 | -6.05708600 | -0.89675300 |
| C  | -4.90841200 | -3.89634300 | 1.43809900  |
| H  | -5.00982200 | -6.03410100 | 1.26593700  |
| C  | -3.74873100 | -2.67515300 | -0.36409400 |
| H  | -2.97350200 | -3.93883500 | -1.91469300 |
| C  | -4.45995800 | -2.67445000 | 0.88105600  |
| H  | -5.45292600 | -3.86240100 | 2.37935600  |
| O  | -3.29526200 | -1.61602400 | -0.95973000 |
| C  | -4.75275400 | -1.46577100 | 1.58747300  |
| Co | -3.16000000 | 0.09172800  | -0.17809700 |
| N  | -4.33204700 | -0.28775300 | 1.26981800  |
| H  | -5.38626600 | -1.57099100 | 2.46906300  |
| N  | -2.90165900 | 1.79078600  | 0.66503800  |
| Cl | -4.89821700 | 0.90267100  | -1.35215600 |
| C  | -4.69844800 | 0.92998900  | 1.99629300  |
| C  | -2.41230900 | 2.83658500  | 0.08968400  |
| C  | -3.41794700 | 1.78732600  | 2.03817500  |
| C  | -5.28751000 | 0.74530400  | 3.39414000  |
| H  | -2.38681300 | 3.77650900  | 0.64286000  |
| C  | -1.90947900 | 2.88224900  | -1.25273500 |
| C  | -3.67788700 | 3.15009000  | 2.67879800  |
| C  | -5.54767100 | 2.11216300  | 4.04374100  |
| H  | -4.58954800 | 0.16377300  | 4.01156400  |
| H  | -6.22374400 | 0.18029000  | 3.34082400  |
| C  | -1.57926400 | 4.14256500  | -1.79956300 |
| C  | -1.74327100 | 1.69325900  | -2.03817400 |
| C  | -4.27777700 | 2.96960400  | 4.08093300  |
| H  | -2.74891400 | 3.72670700  | 2.74713400  |
| H  | -4.37060700 | 3.71955100  | 2.04554300  |
| H  | -5.94127200 | 1.97240900  | 5.05598200  |
| H  | -6.32408800 | 2.63878600  | 3.47354500  |
| C  | -1.12660300 | 4.27251100  | -3.09869100 |
| H  | -1.70707100 | 5.02510500  | -1.17646400 |
| C  | -1.29264100 | 1.86195700  | -3.37691700 |
| O  | -1.93325800 | 0.49116000  | -1.58322400 |
| H  | -3.53449100 | 2.48983700  | 4.73181500  |
| H  | -4.49243900 | 3.94973700  | 4.51953900  |
| C  | -0.99702100 | 3.11224800  | -3.88719000 |
| H  | -0.89574700 | 5.24874600  | -3.51077500 |
| H  | -1.21726000 | 0.97329100  | -3.99399800 |
| H  | -0.66698700 | 3.20016700  | -4.91892800 |
| H  | -5.41983400 | 1.45810900  | 1.35894000  |
| H  | -2.68470300 | 1.23674000  | 2.64519300  |
| H  | 3.86045100  | 1.96163800  | -1.90806200 |
| H  | 2.28062200  | 1.89800700  | 0.67380900  |

**PO-Co<sup>III</sup>-Cl + H<sub>2</sub>O-Co<sup>III</sup>-OH bimetallic PO ring-opening in the middle carbon**

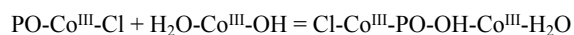

Charge: 0

Spin Multiplicity: 1

Sum of electronic and thermal Free Energies (a.u.): -3163.800229

Thermal correction to Gibbs Free Energy (a.u.): 0.787884

No imaginary frequency

Calculation of single point energy based on the optimized structure, Ep = -5641.0118886 a.u.

|    |             |             |             |
|----|-------------|-------------|-------------|
| C  | 7.53664700  | -1.49345400 | 2.61930700  |
| C  | 7.56051900  | -0.23832700 | 3.25726500  |
| C  | 6.56341500  | -1.80553400 | 1.68768000  |
| H  | 8.29480200  | -2.23282900 | 2.86152300  |
| C  | 6.58465400  | 0.68452600  | 2.94179700  |
| H  | 8.32781500  | -0.00548300 | 3.98702300  |
| C  | 5.55452300  | -0.87292300 | 1.33969300  |
| H  | 6.53893000  | -2.77222600 | 1.19608600  |
| C  | 5.57615600  | 0.40025100  | 1.99004600  |
| H  | 6.57433800  | 1.65683800  | 3.42843800  |
| O  | 4.66514900  | -1.23072400 | 0.44087900  |
| C  | 4.57314100  | 1.39983600  | 1.75498200  |
| Co | 3.36560900  | -0.09781000 | -0.36140800 |
| N  | 3.62350700  | 1.33039900  | 0.88482100  |
| H  | 4.62954900  | 2.28637700  | 2.38753600  |
| N  | 2.09037600  | 1.02330400  | -1.18482700 |
| C  | 2.56095700  | 2.34102700  | 0.76852600  |
| C  | 1.16907300  | 0.62003000  | -2.00144200 |
| C  | 2.21554400  | 2.41688300  | -0.72555200 |
| C  | 2.85481900  | 3.72634600  | 1.34270600  |
| H  | 0.40561300  | 1.32566900  | -2.30340400 |
| C  | 1.08703600  | -0.69074700 | -2.57775700 |
| C  | 1.01325000  | 3.32594500  | -0.96436900 |
| C  | 1.65155600  | 4.65277800  | 1.09990500  |
| H  | 3.75344400  | 4.13813000  | 0.86341200  |
| H  | 3.05574000  | 3.66441500  | 2.41755400  |
| C  | -0.04946000 | -1.01460900 | -3.35471900 |
| C  | 2.15588600  | -1.62412300 | -2.45876200 |
| C  | 1.27874400  | 4.72087800  | -0.38512100 |
| H  | 0.78960600  | 3.40575000  | -2.02998400 |
| H  | 0.12784000  | 2.88955000  | -0.49226700 |
| H  | 1.87525500  | 5.65213600  | 1.48733500  |
| H  | 0.79269100  | 4.27696800  | 1.67099600  |
| C  | -0.09887400 | -2.19193100 | -4.07653200 |
| H  | -0.90059900 | -0.34527600 | -3.32439300 |
| C  | 2.08335800  | -2.81959300 | -3.20142500 |
| O  | 3.23334600  | -1.40952100 | -1.71395500 |
| H  | 2.09308900  | 5.20278500  | -0.94336000 |
| H  | 0.38687200  | 5.33845300  | -0.52825600 |
| C  | 0.98510700  | -3.08239000 | -4.00892000 |
| H  | -0.98005200 | -2.43895400 | -4.65706500 |
| H  | 2.90845200  | -3.51903300 | -3.11985000 |
| H  | 0.95277600  | -4.01211900 | -4.57019700 |
| O  | 2.14170500  | -0.92146800 | 0.87076100  |
| H  | 2.64356500  | -1.73212800 | 1.06050800  |
| O  | 4.78926100  | 0.56204300  | -1.59356200 |
| H  | 4.56584200  | -0.16096400 | -2.22493200 |
| H  | 5.61051300  | 0.26773000  | -1.16636100 |
| C  | 0.68536300  | -1.26418900 | 0.79069600  |
| C  | -0.12143500 | -0.00710500 | 1.16451200  |
| O  | -1.45381300 | -0.29123400 | 1.35369300  |
| H  | 0.46562300  | -1.56635300 | -0.23085200 |
| H  | 0.03643800  | 0.75563900  | 0.39086900  |
| H  | 0.31881500  | 0.37871100  | 2.10815500  |
| C  | 0.46933100  | -2.40371800 | 1.76519600  |
| H  | 0.96012000  | -3.32407600 | 1.43146000  |
| H  | 0.83448200  | -2.12633300 | 2.76100900  |
| H  | -0.60168800 | -2.59296800 | 1.83195500  |
| C  | -1.00180300 | -5.21902700 | -0.65344400 |
| C  | -1.89767000 | -5.68337500 | 0.33064700  |
| C  | -1.00191000 | -3.89986300 | -1.05954700 |
| H  | -0.29378000 | -5.91067300 | -1.10429800 |

|    |             |             |             |
|----|-------------|-------------|-------------|
| C  | -2.78266800 | -4.78190300 | 0.88717100  |
| H  | -1.89309000 | -6.72302100 | 0.64014900  |
| C  | -1.90103100 | -2.94285400 | -0.50197800 |
| H  | -0.31112800 | -3.54848700 | -1.81359000 |
| C  | -2.80424100 | -3.42050100 | 0.50574900  |
| H  | -3.48554700 | -5.11037100 | 1.65039200  |
| O  | -1.82761300 | -1.71787800 | -0.91232800 |
| C  | -3.73702100 | -2.55809700 | 1.17001500  |
| Co | -2.68776700 | -0.23470200 | -0.09505000 |
| N  | -3.82142400 | -1.28360700 | 1.01990600  |
| H  | -4.42301400 | -3.04983800 | 1.86141300  |
| N  | -3.46360600 | 1.27856600  | 0.79177400  |
| Cl | -4.40468100 | -0.22549200 | -1.65612800 |
| C  | -4.82183200 | -0.46001800 | 1.70167100  |
| C  | -3.43215500 | 2.49773300  | 0.38702100  |
| C  | -4.10349500 | 0.86076800  | 2.03978900  |
| C  | -5.47701700 | -1.07058400 | 2.94089300  |
| H  | -3.92227100 | 3.26787800  | 0.98514400  |
| C  | -2.83199500 | 2.94270200  | -0.84182700 |
| C  | -5.04872500 | 1.86566400  | 2.69628700  |
| C  | -6.42588300 | -0.05926000 | 3.59883000  |
| H  | -4.69613400 | -1.36885000 | 3.65343700  |
| H  | -6.03495100 | -1.97363500 | 2.67251100  |
| C  | -3.04737100 | 4.27653600  | -1.24219600 |
| C  | -2.05669700 | 2.06060200  | -1.66304400 |
| C  | -5.70322900 | 1.24826500  | 3.93992300  |
| H  | -4.50615800 | 2.77482700  | 2.97842700  |
| H  | -5.82397300 | 2.15937300  | 1.97602700  |
| H  | -6.86801700 | -0.49699100 | 4.50049900  |
| H  | -7.25604900 | 0.15474600  | 2.91264300  |
| C  | -2.57857900 | 4.76144200  | -2.45159600 |
| H  | -3.61768000 | 4.92610500  | -0.58106500 |
| C  | -1.66306500 | 2.56361800  | -2.93607900 |
| O  | -1.65085300 | 0.88437500  | -1.28316700 |
| H  | -4.92932300 | 1.04866800  | 4.69346300  |
| H  | -6.40080900 | 1.96478300  | 4.38725300  |
| C  | -1.90565600 | 3.87450600  | -3.30973900 |
| H  | -2.76259400 | 5.78844700  | -2.74799000 |
| H  | -1.17349600 | 1.88188800  | -3.62338800 |
| H  | -1.57930200 | 4.21673200  | -4.28869700 |
| H  | -5.58918500 | -0.23040400 | 0.95016100  |
| H  | -3.28087100 | 0.61278700  | 2.72311100  |
| H  | 3.09393300  | 2.83239500  | -1.24107300 |
| H  | 1.68839300  | 1.92179600  | 1.28325000  |

#### subsequent hydration

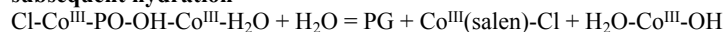

Charge: 0

Spin Multiplicity: 1

Sum of electronic and thermal Free Energies (a.u.): -3240.186174

Thermal correction to Gibbs Free Energy (a.u.): 0.807091

Imaginary frequencies: -421.20

Calculation of single point energy based on the optimized structure, Et = -5717.4519243 a.u.

|    |             |             |             |
|----|-------------|-------------|-------------|
| C  | -5.71198700 | 3.32268400  | -2.66941500 |
| C  | -4.76476100 | 4.27895100  | -2.25587200 |
| C  | -5.69765300 | 2.03629500  | -2.16258200 |
| H  | -6.46928100 | 3.59690100  | -3.39881700 |
| C  | -3.80485100 | 3.90784300  | -1.33660400 |
| C  | -4.72798100 | 1.63286600  | -1.20970200 |
| C  | -3.75611000 | 2.59794400  | -0.80313400 |
| H  | -3.05649900 | 4.61931200  | -1.00470100 |
| O  | -4.79028700 | 0.40461800  | -0.75059700 |
| C  | -2.71453900 | 2.29790000  | 0.13696900  |
| Co | -3.62273900 | -0.39198000 | 0.50130200  |
| N  | -2.56062900 | 1.17578700  | 0.76138000  |
| H  | -1.99618000 | 3.09857500  | 0.31474700  |
| N  | -2.52913200 | -1.18437100 | 1.84639800  |
| C  | -1.41068300 | 0.93563300  | 1.65072600  |
| C  | -2.33442300 | -2.45613200 | 1.96806200  |
| C  | -1.83337500 | -0.16542600 | 2.63780000  |

|    |             |             |             |
|----|-------------|-------------|-------------|
| C  | -0.88001600 | 2.14771100  | 2.41680800  |
| H  | -1.58634300 | -2.80703400 | 2.67976500  |
| C  | -3.02029400 | -3.46002900 | 1.20818200  |
| C  | -0.63597100 | -0.63374100 | 3.46424100  |
| C  | 0.31982100  | 1.70800500  | 3.26688300  |
| H  | -1.67645400 | 2.56615700  | 3.04714800  |
| H  | -0.55700300 | 2.92681200  | 1.72385400  |
| C  | -2.53229500 | -4.78566000 | 1.24297100  |
| C  | -4.20105300 | -3.14756300 | 0.46155200  |
| C  | -0.03127400 | 0.56010700  | 4.21916600  |
| H  | -0.93659900 | -1.40805700 | 4.17843500  |
| H  | 0.11395900  | -1.07185600 | 2.79308600  |
| H  | 0.71205900  | 2.56196600  | 3.83007000  |
| H  | 1.10989600  | 1.37928900  | 2.58438000  |
| C  | -3.16539400 | -5.79863800 | 0.54924100  |
| H  | -1.63259200 | -4.99262300 | 1.81736100  |
| C  | -4.84126200 | -4.20978100 | -0.22018500 |
| O  | -4.72950000 | -1.94938900 | 0.41922300  |
| H  | -0.75036200 | 0.91155800  | 4.97094800  |
| H  | 0.86056000  | 0.23504000  | 4.76633500  |
| C  | -4.33194800 | -5.49597100 | -0.17943700 |
| H  | -4.84061900 | -6.28560900 | -0.72566400 |
| O  | -2.53288800 | -1.03762100 | -0.83815700 |
| H  | -2.84883200 | -0.62683100 | -1.65542700 |
| O  | -5.02945200 | 0.14036400  | 1.90189200  |
| H  | -5.42314700 | -0.75472700 | 1.85227500  |
| H  | -5.58753800 | 0.66872500  | 1.30500000  |
| H  | -0.58827400 | 0.54503500  | 1.03828500  |
| H  | -2.59042600 | 0.26542000  | 3.30864300  |
| C  | -0.51984600 | -1.71692000 | -0.80297900 |
| C  | 0.17382400  | -0.40371300 | -1.12984200 |
| O  | 1.14792400  | -0.10941200 | -0.14840500 |
| H  | -0.84726100 | -1.89354600 | 0.20030900  |
| H  | -0.59966200 | 0.36959900  | -1.16458600 |
| H  | 0.62122700  | -0.47602600 | -2.12463000 |
| C  | -0.78982600 | -2.72987800 | -1.87000500 |
| H  | 0.15543800  | -3.04993000 | -2.31770500 |
| H  | -1.33436900 | -3.59082800 | -1.48268900 |
| H  | -1.37669400 | -2.27051800 | -2.66973800 |
| O  | 1.18547300  | -2.54654000 | 0.01707900  |
| H  | 1.41672900  | -1.54089400 | 0.12369000  |
| H  | 1.80036000  | -2.86677600 | -0.66180600 |
| H  | -5.73688800 | -3.97297500 | -0.78426500 |
| H  | -2.77508200 | -6.81018000 | 0.56830800  |
| H  | -6.42588100 | 1.29542700  | -2.47530000 |
| H  | -4.78797700 | 5.28682000  | -2.65557200 |
| C  | -0.53163700 | 4.35883100  | -2.21532000 |
| C  | -0.34192600 | 5.02063300  | -0.98127300 |
| C  | 0.19011600  | 3.23070000  | -2.54047700 |
| H  | -1.26208000 | 4.74232300  | -2.92213300 |
| C  | 0.58894300  | 4.51103800  | -0.09714900 |
| H  | -0.89454600 | 5.92439700  | -0.74629300 |
| C  | 1.16723200  | 2.68245600  | -1.65367700 |
| H  | 0.05662100  | 2.72855400  | -3.49263400 |
| C  | 1.33737100  | 3.34706200  | -0.39015700 |
| H  | 0.77034000  | 5.01261300  | 0.85174700  |
| O  | 1.83393100  | 1.65020200  | -2.04280800 |
| C  | 2.30655000  | 2.90782700  | 0.56943300  |
| Co | 2.83656700  | 0.52011700  | -0.89665300 |
| N  | 2.99070600  | 1.81943600  | 0.49153100  |
| H  | 2.46608600  | 3.56667200  | 1.42484300  |
| N  | 3.78202900  | -0.64075500 | 0.30471700  |
| C  | 4.04169000  | 1.45175100  | 1.44368400  |
| C  | 4.31740000  | -1.77013800 | -0.01657300 |
| C  | 3.88402300  | -0.06519700 | 1.65050800  |
| C  | 4.08447200  | 2.21294900  | 2.76785700  |
| H  | 4.90201800  | -2.30478100 | 0.73288400  |
| C  | 4.18707200  | -2.42713000 | -1.28337100 |
| C  | 4.98276000  | -0.62377000 | 2.55476400  |

|    |            |             |             |
|----|------------|-------------|-------------|
| C  | 5.19509400 | 1.64673400  | 3.66378600  |
| H  | 3.11988000 | 2.12909400  | 3.28261100  |
| H  | 4.26352800 | 3.27771300  | 2.58487300  |
| C  | 4.84003900 | -3.67276700 | -1.45531000 |
| C  | 3.37865200 | -1.89139500 | -2.34392800 |
| C  | 5.01841200 | 0.14071400  | 3.88568700  |
| H  | 4.81829500 | -1.68929100 | 2.74738300  |
| H  | 5.94924500 | -0.52905600 | 2.04327900  |
| H  | 5.20388900 | 2.17507400  | 4.62314000  |
| H  | 6.16892800 | 1.83153300  | 3.19225500  |
| C  | 4.71793000 | -4.40239800 | -2.61832100 |
| H  | 5.44742500 | -4.05043600 | -0.63555700 |
| C  | 3.26485600 | -2.67664600 | -3.52926000 |
| O  | 2.71836500 | -0.78231200 | -2.27764600 |
| H  | 4.08067800 | -0.03799800 | 4.43043400  |
| H  | 5.82502500 | -0.25018900 | 4.51483300  |
| C  | 3.91429000 | -3.88696600 | -3.65791700 |
| H  | 5.22608100 | -5.35346900 | -2.73350200 |
| H  | 2.65779900 | -2.26910000 | -4.33065100 |
| H  | 3.80714100 | -4.45103800 | -4.58078300 |
| Cl | 4.83303100 | 1.25616600  | -1.73066700 |
| H  | 4.98674400 | 1.60237300  | 0.90662400  |
| H  | 2.90776900 | -0.22835500 | 2.13290100  |

**subsequent hydration**

Cl-Co<sup>III</sup>-PO-OH-Co<sup>III</sup>-H<sub>2</sub>O + H<sub>2</sub>O = PG + Co<sup>III</sup>(salen)-Cl + H<sub>2</sub>O-Co<sup>III</sup>-OH

Charge: 0

Spin Multiplicity: 1

Sum of electronic and thermal Free Energies (a.u.): -3240.230941

Thermal correction to Gibbs Free Energy (a.u.): 0.811598

No imaginary frequency

Calculation of single point energy based on the optimized structure, Er = -5717.5018756 a.u.

|    |             |             |             |
|----|-------------|-------------|-------------|
| C  | 5.81861800  | -2.87784000 | -2.59057100 |
| C  | 4.93310000  | -3.91810900 | -2.25623900 |
| C  | 5.69552600  | -1.62228500 | -2.02016800 |
| H  | 6.61376400  | -3.05770900 | -3.30865700 |
| C  | 3.92523100  | -3.66765000 | -1.34659400 |
| C  | 4.67186900  | -1.34306600 | -1.08479700 |
| C  | 3.76880500  | -2.39478900 | -0.74935600 |
| H  | 3.21917200  | -4.44544600 | -1.07643500 |
| O  | 4.61915600  | -0.12475300 | -0.57640900 |
| C  | 2.69158200  | -2.22629700 | 0.18527900  |
| Co | 3.35251200  | 0.52128300  | 0.66634900  |
| N  | 2.42439300  | -1.14721700 | 0.84449900  |
| H  | 2.04510200  | -3.09363100 | 0.32256700  |
| N  | 2.13132900  | 1.16338500  | 1.96844100  |
| C  | 1.25169700  | -1.05023000 | 1.73975200  |
| C  | 1.74373400  | 2.39050300  | 2.05851500  |
| C  | 1.58054800  | 0.05505500  | 2.75361800  |
| C  | 0.86738100  | -2.33348400 | 2.47405400  |
| H  | 0.91232600  | 2.63094500  | 2.71489300  |
| C  | 2.33188900  | 3.46568400  | 1.30595300  |
| C  | 0.38974300  | 0.37163800  | 3.65539600  |
| C  | -0.33614400 | -2.04216200 | 3.38075000  |
| H  | 1.72207800  | -2.69213000 | 3.06437900  |
| H  | 0.59949600  | -3.11639100 | 1.76247700  |
| C  | 1.65513400  | 4.70137500  | 1.24777800  |
| C  | 3.59373600  | 3.30707300  | 0.65651100  |
| C  | -0.05560000 | -0.91053000 | 4.37533000  |
| H  | 0.67047700  | 1.13322700  | 4.39232400  |
| H  | -0.42737300 | 0.78344000  | 3.05411700  |
| H  | -0.63350700 | -2.95331500 | 3.91128700  |
| H  | -1.17597800 | -1.75379000 | 2.74142600  |
| C  | 2.19272200  | 5.77570100  | 0.56218200  |
| H  | 0.68823300  | 4.78294100  | 1.73642100  |
| C  | 4.13190400  | 4.42390400  | -0.01684500 |
| O  | 4.28313700  | 2.18008200  | 0.68682000  |
| H  | 0.72679000  | -1.22666500 | 5.07853400  |
| H  | -0.94958900 | -0.70263300 | 4.97309500  |
| C  | 3.44318100  | 5.62680800  | -0.06262300 |

|    |             |             |             |
|----|-------------|-------------|-------------|
| H  | 3.87624500  | 6.46514100  | -0.60097300 |
| O  | 2.35228700  | 1.14068700  | -0.84717200 |
| H  | 2.75780300  | 0.73709500  | -1.62930500 |
| O  | 4.68955600  | 0.09083200  | 2.06862200  |
| H  | 5.00297100  | 1.02038400  | 2.10726400  |
| H  | 5.34563000  | -0.35724400 | 1.50400700  |
| H  | 0.39814100  | -0.72126700 | 1.12501700  |
| H  | 2.41174700  | -0.30926300 | 3.37428700  |
| C  | 0.91525200  | 1.41691100  | -1.05033500 |
| C  | 0.11033400  | 0.12184200  | -1.25908100 |
| O  | -0.91774900 | -0.00738300 | -0.30359700 |
| H  | 0.61318800  | 1.89088600  | -0.12253300 |
| H  | 0.80674600  | -0.72910500 | -1.20090800 |
| H  | -0.30310800 | 0.12045800  | -2.27054500 |
| C  | 0.81755200  | 2.41371100  | -2.19029400 |
| H  | -0.22934800 | 2.69727900  | -2.32708000 |
| H  | 1.40919700  | 3.30882500  | -1.97982400 |
| H  | 1.15712300  | 1.96969400  | -3.13409200 |
| O  | -1.12639100 | 2.08478400  | 1.29978300  |
| H  | -1.09405600 | 1.28017600  | 0.69913300  |
| H  | -1.64841000 | 2.71530600  | 0.78768900  |
| H  | 5.09248000  | 4.30282700  | -0.50574100 |
| H  | 1.65932200  | 6.71817300  | 0.50685900  |
| H  | 6.37503300  | -0.81564000 | -2.27413500 |
| H  | 5.03831200  | -4.89810500 | -2.70828100 |
| C  | 0.70199400  | -4.48747800 | -2.24820500 |
| C  | 0.50413900  | -5.10814600 | -0.99444200 |
| C  | -0.02157600 | -3.37401300 | -2.61832000 |
| H  | 1.43739600  | -4.89411600 | -2.93743100 |
| C  | -0.44582200 | -4.57698700 | -0.14128000 |
| H  | 1.05691900  | -6.00195800 | -0.72395500 |
| C  | -1.00770000 | -2.79610200 | -1.75885300 |
| H  | 0.11939800  | -2.90338500 | -3.58547200 |
| C  | -1.19238100 | -3.42550100 | -0.47838100 |
| H  | -0.64397900 | -5.05501600 | 0.81662100  |
| O  | -1.66784700 | -1.77522100 | -2.18140400 |
| C  | -2.19247200 | -2.96781200 | 0.44376200  |
| Co | -2.61531400 | -0.56645600 | -1.04990600 |
| N  | -2.85781800 | -1.87239900 | 0.32849600  |
| H  | -2.39764600 | -3.62116800 | 1.29418600  |
| N  | -3.53999600 | 0.61281600  | 0.14309500  |
| C  | -3.94976900 | -1.48636400 | 1.22529500  |
| C  | -3.92291100 | 1.80983700  | -0.14613500 |
| C  | -3.75434200 | 0.01861300  | 1.46708600  |
| C  | -4.10920900 | -2.26886200 | 2.52722600  |
| H  | -4.48497100 | 2.37214400  | 0.60101800  |
| C  | -3.65020800 | 2.50653800  | -1.36553500 |
| C  | -4.89711400 | 0.60103200  | 2.29984200  |
| C  | -5.26789600 | -1.68163300 | 3.34570800  |
| H  | -3.18674000 | -2.22186700 | 3.11852400  |
| H  | -4.30324000 | -3.32512600 | 2.31174500  |
| C  | -4.12384400 | 3.83613100  | -1.48729900 |
| C  | -2.90200800 | 1.91210300  | -2.43914100 |
| C  | -5.05987800 | -0.18601000 | 3.60810100  |
| H  | -4.70516100 | 1.65376200  | 2.53126300  |
| H  | -5.82484200 | 0.55614200  | 1.71522500  |
| H  | -5.36839900 | -2.22471900 | 4.29170900  |
| H  | -6.20698300 | -1.82637400 | 2.79620400  |
| C  | -3.88127700 | 4.59617800  | -2.61146200 |
| H  | -4.69372800 | 4.25413900  | -0.65960300 |
| C  | -2.67530600 | 2.72437800  | -3.59161000 |
| O  | -2.40427900 | 0.72234300  | -2.42549000 |
| H  | -4.16054500 | -0.04885900 | 4.22489900  |
| H  | -5.89872400 | 0.22098100  | 4.18284100  |
| C  | -3.14628000 | 4.01818100  | -3.66916100 |
| H  | -4.25134700 | 5.61291400  | -2.68659000 |
| H  | -2.12170200 | 2.27179100  | -4.40743400 |
| H  | -2.95162700 | 4.60077000  | -4.56611000 |
| Cl | -4.64214500 | -1.19522200 | -1.93502800 |

|   |             |             |            |
|---|-------------|-------------|------------|
| H | -4.86175000 | -1.59649000 | 0.62536100 |
| H | -2.81211700 | 0.15627300  | 2.01786600 |

**subsequent hydration**

Cl-Co<sup>III</sup>-PO-OH-Co<sup>III</sup>-H<sub>2</sub>O + H<sub>2</sub>O = PG + Co<sup>III</sup>(salen)-Cl + H<sub>2</sub>O-Co<sup>III</sup>-OH

Charge: 0

Spin Multiplicity: 1

Sum of electronic and thermal Free Energies (a.u.): -3240.241600

Thermal correction to Gibbs Free Energy (a.u.): 0.808943

No imaginary frequency

Calculation of single point energy based on the optimized structure, Ep = -5717.5075315 a.u.

|    |             |             |             |
|----|-------------|-------------|-------------|
| C  | 6.36289500  | -2.60140100 | -3.01516700 |
| C  | 5.53078900  | -3.69689000 | -2.71125100 |
| C  | 6.21590500  | -1.38968300 | -2.36685500 |
| H  | 7.13331800  | -2.70731900 | -3.77422200 |
| C  | 4.55394500  | -3.53857300 | -1.74934200 |
| C  | 5.22024500  | -1.20022900 | -1.37271500 |
| C  | 4.37225100  | -2.31071400 | -1.06996200 |
| H  | 3.89553000  | -4.36470100 | -1.49584000 |
| O  | 5.14977400  | -0.03470300 | -0.78155500 |
| C  | 3.31792300  | -2.23344800 | -0.10220500 |
| Co | 3.81883100  | 0.52358300  | 0.44875200  |
| N  | 3.02720100  | -1.20438900 | 0.62165800  |
| H  | 2.70579100  | -3.12898800 | -0.00264000 |
| N  | 2.58243700  | 1.07106300  | 1.78934600  |
| C  | 1.82711900  | -1.19062200 | 1.47199900  |
| C  | 2.21955700  | 2.29105200  | 2.00018100  |
| C  | 2.03023500  | -0.07734000 | 2.51116900  |
| C  | 1.47527700  | -2.50319600 | 2.17559200  |
| H  | 1.42616500  | 2.48410200  | 2.72366200  |
| C  | 2.78460500  | 3.44204800  | 1.35843300  |
| C  | 0.74887000  | 0.15239000  | 3.31313600  |
| C  | 0.20649600  | -2.30633000 | 3.01699700  |
| H  | 2.31804200  | -2.81120400 | 2.80836300  |
| H  | 1.30009600  | -3.29641300 | 1.44558600  |
| C  | 2.15698900  | 4.69345700  | 1.54896700  |
| C  | 3.98059100  | 3.35166700  | 0.57769500  |
| C  | 0.34262100  | -1.15214500 | 4.01572800  |
| H  | 0.89366100  | 0.94048100  | 4.05972300  |
| H  | -0.04833600 | 0.47626200  | 2.63147800  |
| H  | -0.04457400 | -3.23637900 | 3.53918800  |
| H  | -0.62295300 | -2.08552700 | 2.33828000  |
| C  | 2.65489200  | 5.84394700  | 0.96939500  |
| H  | 1.25466100  | 4.73374600  | 2.15502900  |
| C  | 4.47497600  | 4.54993200  | 0.00476800  |
| O  | 4.65337600  | 2.24258100  | 0.40710100  |
| H  | 1.09792100  | -1.40514500 | 4.77147400  |
| H  | -0.60070400 | -1.00370800 | 4.55359200  |
| C  | 3.82629500  | 5.75719900  | 0.19275500  |
| H  | 4.22881800  | 6.65403100  | -0.27040300 |
| O  | 2.62116200  | 0.96454500  | -0.85441600 |
| H  | 3.18309500  | 1.05881900  | -1.63689900 |
| O  | 5.31788000  | 0.18678700  | 1.87674600  |
| H  | 5.54705800  | 1.13624200  | 1.83378800  |
| H  | 5.92383900  | -0.21629600 | 1.23011600  |
| H  | 0.98642100  | -0.90261600 | 0.82830000  |
| H  | 2.82491700  | -0.41488100 | 3.19255100  |
| C  | -0.42175200 | 2.70573200  | -0.25791500 |
| C  | -0.41430500 | 1.20607100  | -0.53729600 |
| O  | -1.46524900 | 0.60465000  | 0.28650300  |
| H  | -0.01642000 | 2.90005800  | 0.73926700  |
| H  | 0.54457600  | 0.75314800  | -0.30125200 |
| H  | -0.64854500 | 1.00650800  | -1.58218900 |
| C  | 0.38605200  | 3.46593500  | -1.29476400 |
| H  | -0.06051100 | 3.34350600  | -2.28823900 |
| H  | 0.42689200  | 4.52992300  | -1.05097600 |
| H  | 1.40183400  | 3.06041800  | -1.31566300 |
| O  | -1.79519300 | 3.13541300  | -0.16302000 |
| H  | -2.02232600 | 1.38934400  | 0.49339000  |
| H  | -2.21537300 | 2.90886100  | -1.01038300 |



|    |             |             |             |
|----|-------------|-------------|-------------|
| H  | 5.37863500  | 4.48021000  | -0.59132900 |
| H  | 2.15580100  | 6.79625200  | 1.11100000  |
| H  | 6.85297500  | -0.54259300 | -2.59868400 |
| H  | 5.65554700  | -4.64389100 | -3.22490000 |
| C  | 1.13076700  | -3.46483800 | -2.52596600 |
| C  | 0.90659700  | -4.44293200 | -1.52875700 |
| C  | 0.34099400  | -2.33988400 | -2.61413800 |
| H  | 1.94413200  | -3.59906100 | -3.23275500 |
| C  | -0.11158700 | -4.24093600 | -0.62181800 |
| H  | 1.51624500  | -5.33945500 | -1.48822600 |
| C  | -0.74097800 | -2.11672200 | -1.71090600 |
| H  | 0.50414100  | -1.59184100 | -3.38166300 |
| C  | -0.93436500 | -3.08732700 | -0.67170600 |
| H  | -0.30693600 | -4.97743500 | 0.15496600  |
| O  | -1.47123700 | -1.06428500 | -1.88195100 |
| C  | -1.95426000 | -2.94642900 | 0.31715400  |
| Co | -2.85899300 | -0.46327100 | -0.75863600 |
| N  | -2.74629700 | -1.93393900 | 0.45375500  |
| H  | -2.05139100 | -3.77750900 | 1.01712700  |
| N  | -4.17683600 | 0.23332500  | 0.44280800  |
| C  | -3.85154900 | -1.92544100 | 1.42328600  |
| C  | -5.09997100 | 1.07954600  | 0.11578200  |
| C  | -4.12009300 | -0.44465200 | 1.74159900  |
| C  | -3.64382900 | -2.73321900 | 2.70637900  |
| H  | -5.88109100 | 1.30654100  | 0.84184200  |
| C  | -5.18829100 | 1.76050500  | -1.13737000 |
| C  | -5.32813200 | -0.27844200 | 2.66174800  |
| C  | -4.85095200 | -2.56684500 | 3.64082400  |
| H  | -2.73180100 | -2.38870400 | 3.20968600  |
| H  | -3.50591400 | -3.79442200 | 2.47752200  |
| C  | -6.32894900 | 2.55678800  | -1.39211400 |
| C  | -4.13126900 | 1.69753600  | -2.10108600 |
| C  | -5.12583800 | -1.09086700 | 3.94866200  |
| H  | -5.47900400 | 0.77823600  | 2.90758500  |
| H  | -6.23021100 | -0.62543600 | 2.14128500  |
| H  | -4.67984300 | -3.12371300 | 4.56806400  |
| H  | -5.73671500 | -3.00919400 | 3.16651900  |
| C  | -6.45877900 | 3.27208900  | -2.56455700 |
| H  | -7.11416800 | 2.59099800  | -0.64025700 |
| C  | -4.28675600 | 2.45080900  | -3.29248500 |
| O  | -3.01203900 | 1.05034000  | -1.91030900 |
| H  | -4.27942700 | -0.67274500 | 4.51035800  |
| H  | -6.00716600 | -0.99253900 | 4.59079800  |
| C  | -5.41938300 | 3.21126400  | -3.51441600 |
| H  | -7.34239300 | 3.87179600  | -2.75318400 |
| H  | -3.48737900 | 2.39510900  | -4.02348300 |
| H  | -5.51008300 | 3.76902600  | -4.44257200 |
| Cl | -4.42126800 | -1.61599600 | -1.88568200 |
| H  | -4.73244200 | -2.30435600 | 0.88749400  |
| H  | -3.22690800 | -0.06223000 | 2.25869400  |

PO-Co<sup>III</sup>-OAc + H<sub>2</sub>O-Co<sup>III</sup>-OH bimetallic PO ring-opening in the terminal carbon and subsequent hydration

**PO-Co<sup>III</sup>-OAc + H<sub>2</sub>O-Co<sup>III</sup>-OH bimetallic PO ring-opening in the terminal carbon**

PO-Co<sup>III</sup>-OAc + H<sub>2</sub>O-Co<sup>III</sup>-OH = OAc-Co<sup>III</sup>-PO-OH-Co<sup>III</sup>-H<sub>2</sub>O

Charge: 0

Spin Multiplicity: 1

Sum of electronic and thermal Free Energies (a.u.): -2932.017906

Thermal correction to Gibbs Free Energy (a.u.): 0.830352

Imaginary frequencies: -449.05

Calculation of single point energy based on the optimized structure, Et = -5409.3212641 a.u.

|   |            |             |             |
|---|------------|-------------|-------------|
| C | 5.91839600 | -3.16431000 | -3.23937600 |
| C | 5.13055700 | -4.18738300 | -2.67949900 |
| C | 5.88982100 | -1.87781200 | -2.73079400 |
| H | 6.55711000 | -3.38428900 | -4.09057700 |
| C | 4.32699800 | -3.88794600 | -1.59715000 |
| H | 5.15687700 | -5.19110300 | -3.08921500 |
| C | 5.06380500 | -1.53942800 | -1.63123200 |
| H | 6.49082600 | -1.08537400 | -3.16420300 |
| C | 4.27195300 | -2.58338000 | -1.05516600 |

|    |             |             |             |
|----|-------------|-------------|-------------|
| H  | 3.71340000  | -4.66139100 | -1.14126100 |
| O  | 5.09243100  | -0.30708400 | -1.18433100 |
| C  | 3.44685900  | -2.37068300 | 0.09720900  |
| Co | 3.72651600  | 0.44569000  | -0.09236900 |
| N  | 3.24835100  | -1.23765200 | 0.68498400  |
| H  | 2.94760100  | -3.25486600 | 0.50063600  |
| N  | 2.54187900  | 1.18834600  | 1.19511000  |
| C  | 2.30562700  | -1.12054900 | 1.81432500  |
| C  | 1.93056500  | 2.31769600  | 1.09655000  |
| C  | 2.45067500  | 0.30255100  | 2.35888000  |
| C  | 2.51400900  | -2.12200900 | 2.95549400  |
| H  | 1.20746600  | 2.60002900  | 1.86017100  |
| C  | 2.14481200  | 3.25764400  | 0.03047400  |
| C  | 1.37084000  | 0.58693100  | 3.39674600  |
| C  | 1.49239800  | -1.85820200 | 4.07567400  |
| H  | 3.53805100  | -2.01445400 | 3.33613800  |
| H  | 2.41443100  | -3.15102900 | 2.59570500  |
| C  | 1.25736300  | 4.34976400  | -0.08740500 |
| C  | 3.25342900  | 3.12796800  | -0.86381900 |
| C  | 1.53021800  | -0.40384200 | 4.56085000  |
| H  | 1.46517900  | 1.61078400  | 3.77494200  |
| H  | 0.38405200  | 0.48306600  | 2.93063100  |
| H  | 1.67808400  | -2.54251800 | 4.91037800  |
| H  | 0.48434900  | -2.07578700 | 3.70528000  |
| C  | 1.42515400  | 5.30129700  | -1.07677400 |
| H  | 0.42384100  | 4.41963900  | 0.60556300  |
| C  | 3.40416500  | 4.12249000  | -1.85953300 |
| O  | 4.14784200  | 2.16271400  | -0.79368200 |
| H  | 2.48420900  | -0.21031600 | 5.07021800  |
| H  | 0.73837700  | -0.23634300 | 5.29788200  |
| C  | 2.51052300  | 5.17764800  | -1.96155000 |
| H  | 0.72874000  | 6.12755600  | -1.16829900 |
| H  | 4.24437300  | 4.02600000  | -2.53923000 |
| H  | 2.65334100  | 5.91831000  | -2.74378300 |
| O  | 2.47085200  | 0.16029800  | -1.41248100 |
| H  | 2.72587300  | 0.77542900  | -2.11479000 |
| O  | 5.33617200  | 0.80101100  | 1.13907000  |
| H  | 5.43443500  | 1.72128900  | 0.83009900  |
| H  | 5.92577100  | 0.29189800  | 0.54776300  |
| C  | -0.22407500 | 1.22326100  | -1.31562600 |
| C  | 0.45102200  | -0.06532200 | -1.40981800 |
| O  | -1.31270000 | 0.30693800  | -1.40059000 |
| H  | -0.14954900 | 1.70368800  | -0.34511400 |
| H  | 0.52153100  | -0.67784600 | -0.52834300 |
| H  | 0.54526600  | -0.53307800 | -2.37840200 |
| C  | -0.16009300 | 2.19722700  | -2.46838900 |
| H  | -0.94367100 | 2.95292800  | -2.36150900 |
| H  | 0.80499600  | 2.71088000  | -2.48493500 |
| H  | -0.30499200 | 1.67252300  | -3.41784900 |
| C  | -1.35044800 | 4.34483700  | 2.70811200  |
| C  | -2.15135200 | 5.07566000  | 1.81059000  |
| C  | -1.19523600 | 2.97648300  | 2.57898900  |
| H  | -0.84777600 | 4.86036100  | 3.52254100  |
| C  | -2.83682600 | 4.37983600  | 0.83240800  |
| H  | -2.26102300 | 6.14969400  | 1.91125700  |
| C  | -1.81402100 | 2.24328900  | 1.52269500  |
| H  | -0.60347400 | 2.41870400  | 3.29277700  |
| C  | -2.71211100 | 2.98108100  | 0.68175300  |
| H  | -3.51170200 | 4.90828700  | 0.16241900  |
| O  | -1.52376700 | 0.98884700  | 1.36858500  |
| C  | -3.58536400 | 2.33186500  | -0.25504400 |
| Co | -2.38382300 | -0.22786600 | 0.14757300  |
| N  | -3.64844200 | 1.06677600  | -0.48238100 |
| H  | -4.28425400 | 2.98836800  | -0.77483200 |
| N  | -3.21448100 | -1.41464000 | -1.08006300 |
| C  | -4.67067900 | 0.47457400  | -1.35685100 |
| C  | -3.16068300 | -2.69641400 | -1.01471100 |
| C  | -3.98760000 | -0.68922100 | -2.09088400 |
| C  | -5.36780700 | 1.40918100  | -2.34329500 |

|   |             |             |             |
|---|-------------|-------------|-------------|
| H | -3.77267700 | -3.28128400 | -1.70069200 |
| C | -2.33495600 | -3.44407400 | -0.11010000 |
| C | -5.00786900 | -1.49936100 | -2.88757000 |
| C | -6.38652700 | 0.61405100  | -3.17487600 |
| H | -4.62323200 | 1.87831000  | -3.00168300 |
| H | -5.88881300 | 2.21414600  | -1.81406400 |
| C | -2.48988200 | -4.84684200 | -0.08149700 |
| C | -1.30987500 | -2.81430900 | 0.66819500  |
| C | -5.73661200 | -0.58160700 | -3.88046200 |
| H | -4.51445100 | -2.30967200 | -3.43545100 |
| H | -5.72267900 | -1.95332000 | -2.19050400 |
| H | -6.86389800 | 1.27403600  | -3.90732500 |
| H | -7.18051600 | 0.25187600  | -2.50929600 |
| C | -1.67612200 | -5.65546500 | 0.68895600  |
| H | -3.27650800 | -5.28740000 | -0.68996200 |
| C | -0.47482300 | -3.67743200 | 1.42853500  |
| O | -1.07782700 | -1.53178700 | 0.68324300  |
| H | -5.01694600 | -0.21551500 | -4.62538400 |
| H | -6.49228800 | -1.15389900 | -4.42914500 |
| C | -0.65559600 | -5.04849400 | 1.44197700  |
| H | -1.81544400 | -6.73079000 | 0.70655500  |
| H | 0.30600000  | -3.22138400 | 2.01897300  |
| H | 0.00201700  | -5.66344400 | 2.05165000  |
| C | -4.88652900 | -1.90124200 | 3.06831100  |
| H | -4.26695700 | -2.78893300 | 3.23420200  |
| H | -5.93961700 | -2.17544000 | 3.14526600  |
| H | -4.62409300 | -1.17046600 | 3.83728800  |
| C | -4.58582700 | -1.34701100 | 1.67791500  |
| O | -3.41395600 | -0.78656400 | 1.63185900  |
| O | -5.40205700 | -1.47812900 | 0.76022600  |
| H | -5.39890700 | 0.01775400  | -0.67749400 |
| H | -3.24399000 | -0.25791100 | -2.77417100 |
| H | 3.43673700  | 0.36619800  | 2.84059100  |
| H | 1.28507900  | -1.22287700 | 1.42005300  |

**PO-Co<sup>III</sup>-OAc + H<sub>2</sub>O-Co<sup>III</sup>-OH bimetallic PO ring-opening in the terminal carbon**

PO-Co<sup>III</sup>-OAc + H<sub>2</sub>O-Co<sup>III</sup>-OH = OAc-Co<sup>III</sup>-PO-OH-Co<sup>III</sup>-H<sub>2</sub>O

Charge: 0

Spin Multiplicity: 1

Sum of electronic and thermal Free Energies (a.u.): -2932.032844

Thermal correction to Gibbs Free Energy (a.u.): 0.827638

No imaginary frequency

Calculation of single point energy based on the optimized structure, Er = -5409.3351704 a.u.

|    |            |             |             |
|----|------------|-------------|-------------|
| C  | 5.95654100 | -3.42763500 | -3.16282300 |
| C  | 5.14191000 | -4.41579800 | -2.57823800 |
| C  | 5.94704000 | -2.12512000 | -2.69803300 |
| H  | 6.60145100 | -3.68881500 | -3.99769400 |
| C  | 4.33105700 | -4.06259300 | -1.51781100 |
| H  | 5.15335600 | -5.43358900 | -2.95266400 |
| C  | 5.11514400 | -1.73175000 | -1.61882000 |
| H  | 6.56860800 | -1.35910800 | -3.14990700 |
| C  | 4.29578700 | -2.74036300 | -1.01844200 |
| H  | 3.69616500 | -4.80804600 | -1.04424600 |
| O  | 5.15970600 | -0.48522800 | -1.22075600 |
| C  | 3.44961800 | -2.47288500 | 0.10821300  |
| Co | 3.87918500 | 0.33121600  | -0.07405200 |
| N  | 3.28312500 | -1.32563400 | 0.67444300  |
| H  | 2.90257500 | -3.33125000 | 0.50528400  |
| N  | 2.74629700 | 1.14270600  | 1.21708900  |
| C  | 2.30062000 | -1.15239300 | 1.76006200  |
| C  | 2.20650500 | 2.30742500  | 1.10632600  |
| C  | 2.53980700 | 0.24211300  | 2.35057000  |
| C  | 2.36946500 | -2.19075100 | 2.88627500  |
| H  | 1.47908100 | 2.62944100  | 1.84986500  |
| C  | 2.50541400 | 3.23659000  | 0.05288400  |
| C  | 1.44471000 | 0.58835500  | 3.35439600  |
| C  | 1.32670800 | -1.86750800 | 3.97021300  |
| H  | 3.38095600 | -2.17718700 | 3.31273600  |
| H  | 2.20370600 | -3.20177400 | 2.50116700  |
| C  | 1.69481600 | 4.38489200  | -0.07693800 |

|    |             |             |             |
|----|-------------|-------------|-------------|
| C  | 3.62723200  | 3.04136400  | -0.81560000 |
| C  | 1.47302100  | -0.43573600 | 4.49900500  |
| H  | 1.59869500  | 1.59534900  | 3.75820800  |
| H  | 0.47129900  | 0.56506500  | 2.85065200  |
| H  | 1.41359400  | -2.58792400 | 4.79070900  |
| H  | 0.32030600  | -1.98196700 | 3.55178900  |
| C  | 1.94331600  | 5.32934600  | -1.05609700 |
| H  | 0.85103700  | 4.50254300  | 0.59725600  |
| C  | 3.86057900  | 4.03063000  | -1.80196500 |
| O  | 4.45838900  | 2.02997100  | -0.72168100 |
| H  | 2.42009300  | -0.33895300 | 5.04710700  |
| H  | 0.67075700  | -0.21671800 | 5.21103500  |
| C  | 3.03775400  | 5.13949900  | -1.91851200 |
| H  | 1.30453600  | 6.20014400  | -1.15715100 |
| H  | 4.70749100  | 3.88398900  | -2.46419100 |
| H  | 3.24398200  | 5.87305000  | -2.69357200 |
| O  | 2.55242200  | 0.23880500  | -1.32251900 |
| H  | 3.03953900  | 0.43687000  | -2.13548900 |
| O  | 5.54853400  | 0.54874500  | 1.17200200  |
| H  | 5.67066000  | 1.46545900  | 0.85958500  |
| H  | 6.09534900  | 0.02398500  | 0.55749700  |
| C  | -0.10705500 | 1.05047500  | -1.34457300 |
| C  | -0.22562000 | -0.29836500 | -1.87111800 |
| O  | -1.44193000 | 0.41251600  | -1.45301400 |
| H  | 0.20874400  | 1.12773900  | -0.31326000 |
| H  | 0.03525200  | -1.12981800 | -1.23111600 |
| H  | -0.19292100 | -0.46416800 | -2.94466100 |
| C  | 0.07194000  | 2.25375900  | -2.21694500 |
| H  | -0.40643700 | 3.13020700  | -1.77219800 |
| H  | 1.14060400  | 2.45799300  | -2.30940000 |
| H  | -0.35144900 | 2.07882600  | -3.21053900 |
| C  | -1.12803500 | 4.43297700  | 2.47450700  |
| C  | -1.94979900 | 5.17449600  | 1.60371000  |
| C  | -1.04724400 | 3.05590900  | 2.38566000  |
| H  | -0.54940200 | 4.94896100  | 3.23651100  |
| C  | -2.72689900 | 4.48462600  | 0.69437800  |
| H  | -1.99970400 | 6.25535700  | 1.67312500  |
| C  | -1.77014800 | 2.32136200  | 1.40025900  |
| H  | -0.43758800 | 2.49219800  | 3.07888000  |
| C  | -2.67933700 | 3.07551400  | 0.58713700  |
| H  | -3.41493100 | 5.02417400  | 0.04718600  |
| O  | -1.56797300 | 1.04393800  | 1.29306300  |
| C  | -3.63414800 | 2.44143300  | -0.27316100 |
| Co | -2.52443500 | -0.15624800 | 0.14247200  |
| N  | -3.76649400 | 1.17285300  | -0.45763900 |
| H  | -4.33094200 | 3.11298200  | -0.77578500 |
| N  | -3.42206200 | -1.31812900 | -1.06437100 |
| C  | -4.85160800 | 0.60300000  | -1.26851900 |
| C  | -3.40889900 | -2.60280000 | -0.98708500 |
| C  | -4.23599300 | -0.57823500 | -2.03444900 |
| C  | -5.58244000 | 1.54910100  | -2.21872100 |
| H  | -4.07029800 | -3.17248700 | -1.63869000 |
| C  | -2.57054900 | -3.36621200 | -0.11130500 |
| C  | -5.31657400 | -1.36883200 | -2.76915700 |
| C  | -6.66459700 | 0.77330100  | -2.98605900 |
| H  | -4.86774100 | 1.99903800  | -2.92202900 |
| H  | -6.05289200 | 2.36752800  | -1.66351400 |
| C  | -2.76445600 | -4.76465100 | -0.05838000 |
| C  | -1.49517900 | -2.75868300 | 0.61387700  |
| C  | -6.08210400 | -0.43867000 | -3.72221500 |
| H  | -4.87273700 | -2.19123700 | -3.34094000 |
| H  | -5.99876800 | -1.80475500 | -2.02948600 |
| H  | -7.16848800 | 1.44078500  | -3.69324900 |
| H  | -7.42688300 | 0.43121900  | -2.27449500 |
| C  | -1.93839300 | -5.58447700 | 0.68488700  |
| H  | -3.59023400 | -5.18985500 | -0.62415800 |
| C  | -0.64583900 | -3.63360400 | 1.34104100  |
| O  | -1.22715400 | -1.48123500 | 0.60114100  |
| H  | -5.40001700 | -0.09116400 | -4.51014600 |

|   |             |             |             |
|---|-------------|-------------|-------------|
| H | -6.88006200 | -0.99728000 | -4.22269500 |
| C | -0.86475900 | -4.99808900 | 1.37996300  |
| H | -2.10579100 | -6.65516800 | 0.72386500  |
| H | 0.17811200  | -3.19039300 | 1.87947600  |
| H | -0.19479800 | -5.62546200 | 1.96258600  |
| C | -4.93731800 | -1.71645800 | 3.16897000  |
| H | -4.33091000 | -2.61212700 | 3.33974900  |
| H | -5.99242500 | -1.96515700 | 3.28992800  |
| H | -4.63235300 | -0.96863900 | 3.90479900  |
| C | -4.67756900 | -1.21271200 | 1.75265100  |
| O | -3.49732100 | -0.66877000 | 1.65593500  |
| O | -5.52006700 | -1.36044300 | 0.86422800  |
| H | -5.55354600 | 0.16497400  | -0.55093200 |
| H | -3.52892300 | -0.16241100 | -2.76619300 |
| H | 3.50763900  | 0.21014200  | 2.87145100  |
| H | 1.29894900  | -1.15674400 | 1.30662400  |

**PO-Co<sup>III</sup>-OAc + H<sub>2</sub>O-Co<sup>III</sup>-OH bimetallic PO ring-opening in the terminal carbon**

PO-Co<sup>III</sup>-OAc + H<sub>2</sub>O-Co<sup>III</sup>-OH = OAc-Co<sup>III</sup>-PO-OH-Co<sup>III</sup>-H<sub>2</sub>O

Charge: 0

Spin Multiplicity: 1

Sum of electronic and thermal Free Energies (a.u.): -2932.041119

Thermal correction to Gibbs Free Energy (a.u.): 0.835274

No imaginary frequency

Calculation of single point energy based on the optimized structure, Ep = -5409.3521946 a.u.

|    |            |             |             |
|----|------------|-------------|-------------|
| C  | 4.87103200 | -3.75517800 | -3.25183700 |
| C  | 3.93566100 | -4.59029300 | -2.61447300 |
| C  | 5.14536500 | -2.48441700 | -2.77281700 |
| H  | 5.38355700 | -4.10674000 | -4.14299500 |
| C  | 3.29606500 | -4.12932800 | -1.48015600 |
| H  | 3.72283400 | -5.57866600 | -3.00624500 |
| C  | 4.48937800 | -1.98061800 | -1.62741800 |
| H  | 5.85929200 | -1.83551700 | -3.26874500 |
| C  | 3.55513000 | -2.83788500 | -0.96712700 |
| H  | 2.57002700 | -4.75255700 | -0.96406000 |
| O  | 4.79015600 | -0.76693800 | -1.21155700 |
| C  | 2.89313300 | -2.45104100 | 0.24325000  |
| Co | 3.62298000 | 0.26105500  | -0.11994200 |
| N  | 2.95292900 | -1.27895500 | 0.78745100  |
| H  | 2.27183800 | -3.20847000 | 0.72583300  |
| N  | 2.59999500 | 1.24727700  | 1.14020500  |
| C  | 2.14179100 | -0.96169500 | 1.97915400  |
| C  | 2.10886900 | 2.42325500  | 0.94807300  |
| C  | 2.46002900 | 0.47808500  | 2.38038900  |
| C  | 2.37110900 | -1.86591800 | 3.19391300  |
| H  | 1.43063900 | 2.84205900  | 1.68958600  |
| C  | 2.40773200 | 3.24167800  | -0.19534700 |
| C  | 1.44592000 | 0.95002800  | 3.41682100  |
| C  | 1.40827100 | -1.43750400 | 4.31477800  |
| H  | 3.41465200 | -1.76835300 | 3.52101500  |
| H  | 2.21529500 | -2.91764800 | 2.93856000  |
| C  | 1.63660200 | 4.40441800  | -0.40811400 |
| C  | 3.48311400 | 2.92073900  | -1.07819600 |
| C  | 1.55954400 | 0.05095200  | 4.66047700  |
| H  | 1.63879800 | 1.99009600  | 3.70198400  |
| H  | 0.44069400 | 0.88943400  | 2.98461100  |
| H  | 1.57776600 | -2.05100600 | 5.20577800  |
| H  | 0.37738000 | -1.62210900 | 3.99000400  |
| C  | 1.90380000 | 5.24854700  | -1.47093400 |
| H  | 0.81040900 | 4.61060100  | 0.26605900  |
| C  | 3.74473300 | 3.80822000  | -2.14419700 |
| O  | 4.25041400 | 1.84645400  | -0.94788700 |
| H  | 2.53616800 | 0.21749700  | 5.13546600  |
| H  | 0.79886400 | 0.34269500  | 5.39121800  |
| C  | 2.96925200 | 4.94371000  | -2.33319000 |
| H  | 1.29494600 | 6.13025300  | -1.63697500 |
| H  | 4.56520800 | 3.56613800  | -2.81145900 |
| H  | 3.18897000 | 5.60044000  | -3.17026100 |
| O  | 2.28502300 | 0.11341600  | -1.48369600 |
| H  | 2.45326400 | 0.80718800  | -2.13778400 |

|    |             |             |             |
|----|-------------|-------------|-------------|
| O  | 5.25729900  | 0.43063700  | 0.99159300  |
| H  | 5.51135400  | 1.30635300  | 0.63840000  |
| H  | 5.76596700  | -0.20752700 | 0.44903000  |
| C  | -0.07524600 | 1.00431800  | -1.29832200 |
| C  | 0.84715900  | -0.20837000 | -1.42776800 |
| O  | -1.36715700 | 0.52018200  | -1.33127700 |
| H  | 0.15578100  | 1.51348300  | -0.35253400 |
| H  | 0.71154700  | -0.86571000 | -0.57645800 |
| H  | 0.62329200  | -0.75451700 | -2.34911200 |
| C  | 0.10248900  | 1.99733500  | -2.45408900 |
| H  | -0.56355600 | 2.84859700  | -2.29452800 |
| H  | 1.12128700  | 2.39470500  | -2.54278600 |
| H  | -0.17649100 | 1.51378700  | -3.39676900 |
| C  | -1.04685000 | 4.71896600  | 2.21766200  |
| C  | -1.86336000 | 5.35778800  | 1.26742600  |
| C  | -0.96136700 | 3.33869600  | 2.27588900  |
| H  | -0.47894700 | 5.31532200  | 2.92808200  |
| C  | -2.64212600 | 4.56453000  | 0.44250500  |
| H  | -1.92117400 | 6.43963500  | 1.21877300  |
| C  | -1.66894000 | 2.49318600  | 1.36606300  |
| H  | -0.36693700 | 2.86013400  | 3.04279800  |
| C  | -2.58834700 | 3.15610600  | 0.48426500  |
| H  | -3.33867700 | 5.02784900  | -0.25334900 |
| O  | -1.46004900 | 1.21646800  | 1.39138400  |
| C  | -3.56045700 | 2.42860700  | -0.28537600 |
| Co | -2.29912100 | -0.06960900 | 0.21434200  |
| N  | -3.65631800 | 1.15043000  | -0.36074100 |
| H  | -4.29705300 | 3.04073600  | -0.80723600 |
| N  | -3.11367100 | -1.30456000 | -0.98911100 |
| C  | -4.71359100 | 0.47773000  | -1.11882200 |
| C  | -2.91135000 | -2.56952000 | -1.02235000 |
| C  | -4.00488300 | -0.62019700 | -1.93070700 |
| C  | -5.58813600 | 1.35213400  | -2.01374500 |
| H  | -3.46517200 | -3.17196800 | -1.74193300 |
| C  | -2.02014200 | -3.29290800 | -0.15551100 |
| C  | -5.02103800 | -1.49771900 | -2.66034200 |
| C  | -6.61217800 | 0.47757500  | -2.75154000 |
| H  | -4.96212500 | 1.88742000  | -2.74172900 |
| H  | -6.11263700 | 2.10669900  | -1.41692700 |
| C  | -2.04651200 | -4.70056000 | -0.21817100 |
| C  | -1.11742800 | -2.62638400 | 0.73463400  |
| C  | -5.92445000 | -0.63381800 | -3.55187800 |
| H  | -4.51328300 | -2.24566900 | -3.27933300 |
| H  | -5.61991500 | -2.03186900 | -1.91286000 |
| H  | -7.22584800 | 1.09922600  | -3.41292200 |
| H  | -7.29177800 | 0.02697500  | -2.01696900 |
| C  | -1.24526400 | -5.48909500 | 0.58989600  |
| H  | -2.73206200 | -5.16736900 | -0.92208200 |
| C  | -0.34960100 | -3.46629100 | 1.58921300  |
| O  | -0.94026900 | -1.33681800 | 0.77832500  |
| H  | -5.31845800 | -0.18249900 | -4.34961700 |
| H  | -6.67165500 | -1.26562400 | -4.04450700 |
| C  | -0.40364700 | -4.84849800 | 1.51322300  |
| H  | -1.28695800 | -6.57115900 | 0.52997500  |
| H  | 0.26063700  | -2.98614000 | 2.33841900  |
| H  | 0.20281500  | -5.44159700 | 2.19408400  |
| C  | -4.53127800 | -2.00596400 | 3.23010200  |
| H  | -3.77627600 | -2.78752000 | 3.36864100  |
| H  | -5.52639400 | -2.44196300 | 3.33176900  |
| H  | -4.36514000 | -1.25088400 | 4.00300200  |
| C  | -4.35318500 | -1.39539600 | 1.83991500  |
| O  | -3.28108600 | -0.67468700 | 1.75916900  |
| O  | -5.17939700 | -1.63347700 | 0.94801600  |
| H  | -5.32437600 | -0.04691600 | -0.37492200 |
| H  | -3.34202400 | -0.12232900 | -2.65058400 |
| H  | 3.46363400  | 0.48598300  | 2.82870400  |
| H  | 1.08501300  | -0.99930100 | 1.67661800  |

**subsequent hydration**

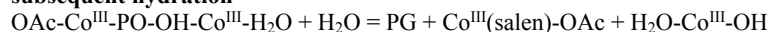

Charge: 0

Spin Multiplicity: 1

Sum of electronic and thermal Free Energies (a.u.): -3008.428921

Thermal correction to Gibbs Free Energy (a.u.): 0.855462

Imaginary frequencies: -467.48

Calculation of single point energy based on the optimized structure, Et = -5485.7914541 a.u.

|    |             |             |             |
|----|-------------|-------------|-------------|
| C  | 5.58982400  | -3.50823900 | -3.12337500 |
| C  | 4.72248100  | -4.44729000 | -2.53378900 |
| C  | 5.68218500  | -2.21531600 | -2.63990200 |
| H  | 6.19512900  | -3.79962300 | -3.97736900 |
| C  | 3.96369100  | -4.05821100 | -1.44832700 |
| H  | 4.65421700  | -5.45653200 | -2.92434400 |
| C  | 4.90343200  | -1.78413100 | -1.53747600 |
| H  | 6.34565700  | -1.48754300 | -3.09513500 |
| C  | 4.03144800  | -2.74347900 | -0.93079000 |
| H  | 3.29038500  | -4.76552600 | -0.96988000 |
| O  | 5.03839800  | -0.54534600 | -1.12562400 |
| C  | 3.23434300  | -2.43506000 | 0.22066000  |
| Co | 3.80941100  | 0.34634600  | 0.02110500  |
| N  | 3.13419100  | -1.27558500 | 0.78044200  |
| H  | 2.65826900  | -3.26314200 | 0.64043300  |
| N  | 2.67778000  | 1.21363900  | 1.26501800  |
| C  | 2.19782900  | -1.05168300 | 1.89856700  |
| C  | 2.12218000  | 2.35962400  | 1.06425600  |
| C  | 2.45727300  | 0.36128100  | 2.43203800  |
| C  | 2.30494900  | -2.04142900 | 3.06378000  |
| H  | 1.36424200  | 2.71215600  | 1.76042700  |
| C  | 2.45147400  | 3.22501500  | -0.03381800 |
| C  | 1.35789700  | 0.74882500  | 3.41516200  |
| C  | 1.24552000  | -1.69314100 | 4.12290200  |
| H  | 3.31458600  | -1.97583900 | 3.48970100  |
| H  | 2.17426300  | -3.07419400 | 2.72662200  |
| C  | 1.61392300  | 4.32892800  | -0.29770700 |
| C  | 3.63070600  | 3.01079000  | -0.81353900 |
| C  | 1.36916600  | -0.23783900 | 4.59441000  |
| H  | 1.51955200  | 1.76679900  | 3.78675000  |
| H  | 0.39085900  | 0.71788500  | 2.90079700  |
| H  | 1.33497900  | -2.37607200 | 4.97433700  |
| H  | 0.24811300  | -1.84582000 | 3.69429200  |
| C  | 1.90676200  | 5.21438800  | -1.32006300 |
| H  | 0.72177600  | 4.46248100  | 0.30636200  |
| C  | 3.91525400  | 3.94198300  | -1.83585100 |
| O  | 4.47085500  | 2.01435900  | -0.60393500 |
| H  | 2.30357100  | -0.11461800 | 5.15893900  |
| H  | 0.55083700  | 0.00236600  | 5.28053000  |
| C  | 3.06911700  | 5.01349700  | -2.08273500 |
| H  | 1.24809600  | 6.05066300  | -1.52752900 |
| H  | 4.81163000  | 3.78250900  | -2.42600700 |
| H  | 3.31039900  | 5.70419300  | -2.88629800 |
| O  | 2.51586900  | 0.38289400  | -1.29792200 |
| H  | 3.04243100  | 0.40411200  | -2.10960400 |
| O  | 5.41838900  | 0.48725600  | 1.26832200  |
| H  | 5.59729600  | 1.40452800  | 0.97928100  |
| H  | 5.99408900  | -0.05641000 | 0.69843500  |
| C  | -0.04624300 | 0.69247100  | -1.46218600 |
| C  | 0.80803100  | -0.56286100 | -1.77973500 |
| O  | -1.42066100 | 0.37589400  | -1.48449000 |
| H  | 0.24816800  | 1.00596800  | -0.45910700 |
| H  | 0.99952600  | -1.27999900 | -1.00048000 |
| H  | 1.26641000  | -0.71689900 | -2.74287700 |
| C  | 0.20176200  | 1.81753100  | -2.46497600 |
| H  | -0.39263400 | 2.68581000  | -2.17103800 |
| H  | 1.25287700  | 2.10773700  | -2.48970900 |
| H  | -0.11811800 | 1.50439800  | -3.46522700 |
| C  | -1.04490800 | 4.60627000  | 2.35669300  |
| C  | -1.83060300 | 5.31786700  | 1.43196400  |
| C  | -0.95483100 | 3.22647200  | 2.30886600  |
| H  | -0.50300400 | 5.14512900  | 3.12990000  |
| C  | -2.58173300 | 4.59298800  | 0.52535000  |

|    |             |             |             |
|----|-------------|-------------|-------------|
| H  | -1.88677200 | 6.40019500  | 1.46498800  |
| C  | -1.62096300 | 2.45802800  | 1.30732100  |
| H  | -0.38311900 | 2.69024000  | 3.05347700  |
| C  | -2.52665500 | 3.18347000  | 0.46446600  |
| H  | -3.26199400 | 5.10716800  | -0.15024900 |
| O  | -1.38661800 | 1.18554800  | 1.21790700  |
| C  | -3.50683400 | 2.51598300  | -0.34172400 |
| Co | -2.37946500 | -0.05886900 | 0.13194800  |
| N  | -3.66365900 | 1.24335800  | -0.44062900 |
| H  | -4.21368900 | 3.16875600  | -0.85464700 |
| N  | -3.38920900 | -1.27613000 | -0.93785900 |
| C  | -4.79631800 | 0.65032300  | -1.16307100 |
| C  | -3.41584100 | -2.54943400 | -0.77517500 |
| C  | -4.23627000 | -0.57220900 | -1.90356700 |
| C  | -5.56772200 | 1.56002700  | -2.11719600 |
| H  | -4.13995000 | -3.13767200 | -1.33729800 |
| C  | -2.52858700 | -3.28650900 | 0.08193000  |
| C  | -5.35669200 | -1.38096700 | -2.55224900 |
| C  | -6.69197500 | 0.76317900  | -2.79702500 |
| H  | -4.88515000 | 1.97189000  | -2.87360000 |
| H  | -6.00416500 | 2.40612800  | -1.57570500 |
| C  | -2.75925800 | -4.67162000 | 0.23056500  |
| C  | -1.37935900 | -2.67522500 | 0.68670500  |
| C  | -6.15501600 | -0.48355700 | -3.50920600 |
| H  | -4.94611600 | -2.23319800 | -3.10519300 |
| H  | -6.01177600 | -1.77446100 | -1.76535700 |
| H  | -7.22529500 | 1.40546000  | -3.50619200 |
| H  | -7.42089200 | 0.45761100  | -2.03546400 |
| C  | -1.90613800 | -5.48149100 | 0.95568300  |
| H  | -3.63965200 | -5.09661800 | -0.24586700 |
| C  | -0.50931700 | -3.54483200 | 1.39902300  |
| O  | -1.06661400 | -1.41416200 | 0.57242700  |
| H  | -5.50495900 | -0.17617200 | -4.33958900 |
| H  | -6.97986000 | -1.05323600 | -3.95041200 |
| C  | -0.76631300 | -4.89704100 | 1.53439900  |
| H  | -2.10541600 | -6.54146800 | 1.06747500  |
| H  | 0.36294700  | -3.10480700 | 1.85587900  |
| H  | -0.07472000 | -5.51331000 | 2.10372100  |
| O  | -0.68094200 | -1.66678200 | -2.47360800 |
| H  | -0.79315500 | -2.34366300 | -1.79052200 |
| H  | -1.26419900 | -0.84885400 | -2.11907200 |
| H  | -3.55423900 | -0.20194000 | -2.68129400 |
| H  | -5.45975600 | 0.25510400  | -0.38569900 |
| H  | 1.17894000  | -1.06633500 | 1.48442900  |
| H  | 3.42198300  | 0.34075100  | 2.95850300  |
| C  | -4.62622300 | -1.50946200 | 3.38829500  |
| H  | -5.66998700 | -1.76048900 | 3.58232900  |
| H  | -4.28152500 | -0.74481400 | 4.08923200  |
| H  | -4.00362400 | -2.39753900 | 3.54044700  |
| C  | -4.45562900 | -1.02776700 | 1.94893800  |
| O  | -3.27568100 | -0.52671100 | 1.74707300  |
| O  | -5.37482100 | -1.15957500 | 1.13251100  |

**subsequent hydration**

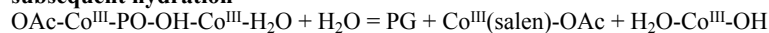

Charge: 0

Spin Multiplicity: 1

Sum of electronic and thermal Free Energies (a.u.): -3008.467971

Thermal correction to Gibbs Free Energy (a.u.): 0.856558

No imaginary frequency

Calculation of single point energy based on the optimized structure,  $E_r = -5485.8411187$  a.u.

|   |            |             |             |
|---|------------|-------------|-------------|
| C | 5.03910000 | -3.70139400 | -3.18884600 |
| C | 4.16584400 | -4.57023900 | -2.50986300 |
| C | 5.24701200 | -2.40437400 | -2.74982100 |
| H | 5.55549000 | -4.04786100 | -4.07955900 |
| C | 3.52036000 | -4.11310400 | -1.37832300 |
| H | 4.00315300 | -5.57993900 | -2.86951800 |
| C | 4.58277100 | -1.90540300 | -1.60600900 |
| H | 5.91330500 | -1.72944500 | -3.27652400 |
| C | 3.71128800 | -2.79436700 | -0.90345800 |



|    |             |             |             |
|----|-------------|-------------|-------------|
| H  | 2.84214500  | -4.76343000 | -0.83184200 |
| O  | 4.81111900  | -0.65574400 | -1.24787100 |
| C  | 3.03752600  | -2.41404000 | 0.30355300  |
| Co | 3.71109000  | 0.32656200  | -0.05643600 |
| N  | 3.05625000  | -1.23634700 | 0.83607700  |
| H  | 2.44625200  | -3.19044500 | 0.79324500  |
| N  | 2.67097400  | 1.28061500  | 1.20572000  |
| C  | 2.23120100  | -0.93571600 | 2.02361800  |
| C  | 2.11169300  | 2.41942200  | 0.97137700  |
| C  | 2.53255300  | 0.50567900  | 2.43988900  |
| C  | 2.44559900  | -1.85034000 | 3.23317800  |
| H  | 1.39676200  | 2.81713000  | 1.68937800  |
| C  | 2.38062800  | 3.21564300  | -0.19402400 |
| C  | 1.50202300  | 0.95913100  | 3.46808800  |
| C  | 1.46228600  | -1.43700400 | 4.34178400  |
| H  | 3.48358600  | -1.75211300 | 3.57682800  |
| H  | 2.29753100  | -2.90133700 | 2.96847300  |
| C  | 1.53495700  | 4.31019400  | -0.47344700 |
| C  | 3.50511500  | 2.94192700  | -1.03093000 |
| C  | 1.60194200  | 0.04869500  | 4.70437900  |
| H  | 1.68283600  | 1.99888300  | 3.76200300  |
| H  | 0.50387200  | 0.89428700  | 3.02084000  |
| H  | 1.62069500  | -2.05849200 | 5.22919200  |
| H  | 0.43862200  | -1.62611200 | 3.99717800  |
| C  | 1.77463800  | 5.12880900  | -1.56288500 |
| H  | 0.67977100  | 4.48782500  | 0.17131600  |
| C  | 3.73807200  | 3.80451400  | -2.12141100 |
| O  | 4.34628000  | 1.93974900  | -0.81813800 |
| H  | 2.57056000  | 0.21475600  | 5.19550800  |
| H  | 0.82927700  | 0.32952700  | 5.42675600  |
| C  | 2.88756600  | 4.87095700  | -2.37945800 |
| H  | 1.10983100  | 5.95690200  | -1.78206400 |
| H  | 4.59525200  | 3.59950600  | -2.75397400 |
| H  | 3.08538900  | 5.50968900  | -3.23577700 |
| O  | 2.32651200  | 0.33918300  | -1.36147200 |
| H  | 2.74477700  | 0.19265900  | -2.22056400 |
| O  | 5.35625300  | 0.48540400  | 1.04205000  |
| H  | 5.56539800  | 1.38249300  | 0.70811900  |
| H  | 5.90154900  | -0.11156800 | 0.49393400  |
| C  | -0.07746600 | 0.91354900  | -1.42376800 |
| C  | 0.96011200  | -0.20690500 | -1.31651800 |
| O  | -1.33056600 | 0.30385500  | -1.40244300 |
| H  | 0.05854100  | 1.57921500  | -0.56375000 |
| H  | 0.83615000  | -0.72120100 | -0.37009400 |
| H  | 0.85166100  | -0.92062900 | -2.13557700 |
| C  | 0.08052000  | 1.73002800  | -2.70733300 |
| H  | -0.68099000 | 2.51404300  | -2.73085300 |
| H  | 1.06400600  | 2.20823800  | -2.76601300 |
| H  | -0.06254200 | 1.08668300  | -3.58294600 |
| C  | -0.98984200 | 4.71423300  | 2.29192500  |
| C  | -1.77245000 | 5.37951100  | 1.33180200  |
| C  | -0.89570300 | 3.33311200  | 2.30655700  |
| H  | -0.45454800 | 5.28953800  | 3.04343100  |
| C  | -2.51670300 | 4.60974200  | 0.45455700  |
| H  | -1.83440400 | 6.46199300  | 1.31553900  |
| C  | -1.55545100 | 2.51592500  | 1.33779100  |
| H  | -0.32778900 | 2.83343300  | 3.07971500  |
| C  | -2.45709600 | 3.20067500  | 0.45578400  |
| H  | -3.19390700 | 5.09113100  | -0.24791900 |
| O  | -1.31223400 | 1.24442600  | 1.30125500  |
| C  | -3.42229800 | 2.49393500  | -0.34059900 |
| Co | -2.27447200 | -0.05432300 | 0.22983200  |
| N  | -3.56128000 | 1.21847500  | -0.40223200 |
| H  | -4.12918500 | 3.12245800  | -0.88333900 |
| N  | -3.24668200 | -1.31371100 | -0.81219100 |
| C  | -4.67216800 | 0.58630700  | -1.12564900 |
| C  | -3.17681300 | -2.58870900 | -0.70345100 |
| C  | -4.07986500 | -0.64856800 | -1.81601900 |
| C  | -5.43950100 | 1.45574900  | -2.11909500 |

|   |             |             |             |
|---|-------------|-------------|-------------|
| H | -3.83454600 | -3.20363500 | -1.31587600 |
| C | -2.27046100 | -3.30020400 | 0.15728000  |
| C | -5.17083700 | -1.49364400 | -2.46820700 |
| C | -6.53954700 | 0.62087100  | -2.79249600 |
| H | -4.74964300 | 1.85265900  | -2.87697100 |
| H | -5.89700900 | 2.31229100  | -1.61195500 |
| C | -2.40604600 | -4.70279200 | 0.23293200  |
| C | -1.21189500 | -2.63779400 | 0.86341600  |
| C | -5.96813900 | -0.63473200 | -3.46056300 |
| H | -4.72693800 | -2.34199100 | -2.99944400 |
| H | -5.83150500 | -1.88845500 | -1.68646200 |
| H | -7.07335300 | 1.23355800  | -3.52737500 |
| H | -7.27425900 | 0.32373500  | -2.03301700 |
| C | -1.55597700 | -5.48442100 | 0.99399300  |
| H | -3.21277900 | -5.16760300 | -0.32934100 |
| C | -0.36659900 | -3.47185700 | 1.64858300  |
| O | -0.96518300 | -1.36221000 | 0.80224900  |
| H | -5.30802700 | -0.33746700 | -4.28655400 |
| H | -6.77500200 | -1.22995700 | -3.90180000 |
| C | -0.53075900 | -4.84443700 | 1.71036400  |
| H | -1.68295800 | -6.56023300 | 1.04340900  |
| H | 0.40117400  | -2.98790000 | 2.23255300  |
| H | 0.13896600  | -5.43138300 | 2.33483600  |
| O | -1.08740600 | -1.92109800 | -2.95707400 |
| H | -1.01732600 | -2.60251300 | -2.27675000 |
| H | -1.25124800 | -1.10278800 | -2.42461500 |
| H | -3.37985100 | -0.30045200 | -2.58589300 |
| H | -5.34267700 | 0.20655700  | -0.34626800 |
| H | 1.17733100  | -0.97706900 | 1.71175200  |
| H | 3.53160500  | 0.51866300  | 2.89795300  |
| C | -4.58473800 | -1.42167700 | 3.48928300  |
| H | -5.62577700 | -1.69979100 | 3.66038100  |
| H | -4.28882400 | -0.61894100 | 4.17002800  |
| H | -3.93908700 | -2.28146500 | 3.69767900  |
| C | -4.38105200 | -0.98940300 | 2.03708000  |
| O | -3.21089600 | -0.46377500 | 1.85073500  |
| O | -5.27428600 | -1.17506700 | 1.20183600  |

#### subsequent hydration

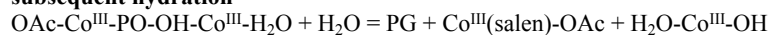

Charge: 0

Spin Multiplicity: 1

Sum of electronic and thermal Free Energies (a.u.): -3008.478688

Thermal correction to Gibbs Free Energy (a.u.): 0.855276

No imaginary frequency

Calculation of single point energy based on the optimized structure,  $E_p = -5485.8430819$  a.u.

|    |            |             |             |
|----|------------|-------------|-------------|
| C  | 6.36006700 | -3.49186200 | -2.89779400 |
| C  | 5.44063400 | -4.45611000 | -2.44194400 |
| C  | 6.36148800 | -2.20662600 | -2.38809300 |
| H  | 7.07900900 | -3.75838600 | -3.66796500 |
| C  | 4.53627200 | -4.09687600 | -1.46299100 |
| H  | 5.44458800 | -5.46010500 | -2.85192400 |
| C  | 5.43559800 | -1.80591300 | -1.39084400 |
| H  | 7.06408400 | -1.45903500 | -2.74120500 |
| C  | 4.50844400 | -2.79086600 | -0.92084700 |
| H  | 3.81850600 | -4.82398900 | -1.08996300 |
| O  | 5.49595100 | -0.57789200 | -0.94307800 |
| C  | 3.55644300 | -2.51701200 | 0.11510800  |
| Co | 4.13659900 | 0.26898500  | 0.08702800  |
| N  | 3.37673700 | -1.37987900 | 0.69868900  |
| H  | 2.93449000 | -3.36151800 | 0.42226700  |
| N  | 2.89156300 | 1.09358600  | 1.25200100  |
| C  | 2.28875100 | -1.19181500 | 1.67562300  |
| C  | 2.39202200 | 2.26799900  | 1.07485400  |
| C  | 2.51638600 | 0.17793400  | 2.32733400  |
| C  | 2.18847100 | -2.25788500 | 2.77333700  |
| H  | 1.57234200 | 2.59749400  | 1.70967600  |
| C  | 2.86456700 | 3.20511300  | 0.09454300  |
| C  | 1.33335200 | 0.54862900  | 3.21497500  |
| C  | 1.04840800 | -1.91252300 | 3.74733800  |

|    |             |             |             |
|----|-------------|-------------|-------------|
| H  | 3.14762400  | -2.30058800 | 3.30544600  |
| H  | 2.02334300  | -3.25200400 | 2.34507400  |
| C  | 2.11289900  | 4.37864500  | -0.12963300 |
| C  | 4.10295000  | 3.00033400  | -0.59291500 |
| C  | 1.19484300  | -0.50106400 | 4.32814000  |
| H  | 1.48608600  | 1.53881100  | 3.65906600  |
| H  | 0.41781700  | 0.57855500  | 2.61284800  |
| H  | 1.01664500  | -2.65466700 | 4.55237200  |
| H  | 0.08976000  | -1.97502500 | 3.22097100  |
| C  | 2.54113400  | 5.34314100  | -1.02315700 |
| H  | 1.17551300  | 4.50249800  | 0.40598100  |
| C  | 4.52537100  | 4.01416900  | -1.48571200 |
| O  | 4.87421400  | 1.95206300  | -0.41197700 |
| H  | 2.07895600  | -0.45739300 | 4.97862700  |
| H  | 0.32815200  | -0.26371100 | 4.95335700  |
| C  | 3.76095500  | 5.15016700  | -1.69607600 |
| H  | 1.94854700  | 6.23438200  | -1.19951600 |
| H  | 5.46576700  | 3.86185500  | -2.00508800 |
| H  | 4.11120100  | 5.90221400  | -2.39826400 |
| O  | 2.95035400  | 0.30510700  | -1.29930000 |
| H  | 3.52141800  | 0.52702100  | -2.04911500 |
| O  | 5.65417100  | 0.34894700  | 1.52127800  |
| H  | 5.85453400  | 1.26977700  | 1.26518100  |
| H  | 6.24682400  | -0.17960800 | 0.95451700  |
| C  | -0.24603200 | 0.60048600  | -1.60195000 |
| C  | 0.33204300  | -0.48367500 | -2.52114700 |
| O  | -1.70540300 | 0.42268200  | -1.66266000 |
| H  | 0.05330500  | 0.40905100  | -0.57101200 |
| H  | 1.37787000  | -0.64935400 | -2.25050200 |
| H  | 0.26236400  | -0.17802700 | -3.57058600 |
| C  | 0.12242300  | 2.01027300  | -2.00110500 |
| H  | -0.32687800 | 2.73682300  | -1.31990700 |
| H  | 1.20915900  | 2.10703500  | -1.94391600 |
| H  | -0.21304800 | 2.22935300  | -3.02037600 |
| C  | -0.98429700 | 4.52516800  | 2.21309200  |
| C  | -1.88366900 | 5.28135400  | 1.43743500  |
| C  | -0.92576100 | 3.14836700  | 2.10532100  |
| H  | -0.32842100 | 5.02826100  | 2.91903200  |
| C  | -2.75602200 | 4.60533900  | 0.60881700  |
| H  | -1.91659100 | 6.36185300  | 1.52036600  |
| C  | -1.74478600 | 2.42833500  | 1.18857500  |
| H  | -0.26152200 | 2.57480100  | 2.73518100  |
| C  | -2.72929900 | 3.19665300  | 0.48515200  |
| H  | -3.50407600 | 5.15442200  | 0.04135400  |
| O  | -1.56053800 | 1.15025900  | 1.04507800  |
| C  | -3.77663000 | 2.57863600  | -0.26807900 |
| Co | -2.67563800 | -0.03074000 | 0.04215900  |
| N  | -3.94993800 | 1.31199700  | -0.43273700 |
| H  | -4.51307600 | 3.25995400  | -0.69454600 |
| N  | -3.76917900 | -1.20021200 | -1.00052900 |
| C  | -5.13759800 | 0.76684900  | -1.10833700 |
| C  | -3.87797400 | -2.46466300 | -0.77958300 |
| C  | -4.65766400 | -0.45852600 | -1.90095600 |
| C  | -5.92548100 | 1.71825000  | -2.00738800 |
| H  | -4.67599500 | -3.01703300 | -1.27343300 |
| C  | -3.00146600 | -3.22670700 | 0.06136900  |
| C  | -5.83928000 | -1.22311700 | -2.49184900 |
| C  | -7.10883900 | 0.96947200  | -2.64135300 |
| H  | -5.26798900 | 2.12282800  | -2.78936200 |
| H  | -6.30805000 | 2.56731000  | -1.43146800 |
| C  | -3.32717900 | -4.57615100 | 0.31800700  |
| C  | -1.76045500 | -2.68580100 | 0.52333300  |
| C  | -6.65548600 | -0.28645100 | -3.39489600 |
| H  | -5.48899400 | -2.08495600 | -3.07072700 |
| H  | -6.46490100 | -1.59979700 | -1.67354400 |
| H  | -7.65229800 | 1.64032400  | -3.31508900 |
| H  | -7.81048200 | 0.68036600  | -1.84846600 |
| C  | -2.46668500 | -5.40898600 | 1.00776800  |
| H  | -4.27989400 | -4.95387500 | -0.04517400 |

|   |             |             |             |
|---|-------------|-------------|-------------|
| C | -0.87351800 | -3.58106600 | 1.16904400  |
| O | -1.37631300 | -1.44898000 | 0.30686600  |
| H | -6.04139100 | 0.00736400  | -4.25685400 |
| H | -7.52276100 | -0.82140400 | -3.79567100 |
| C | -1.22197700 | -4.89782100 | 1.41483700  |
| H | -2.73458400 | -6.44013000 | 1.20958100  |
| H | 0.09079700  | -3.19668600 | 1.46869100  |
| H | -0.51736200 | -5.54498500 | 1.93060600  |
| O | -0.46799100 | -1.67315100 | -2.40893800 |
| H | -0.47327900 | -1.90823300 | -1.46367800 |
| H | -1.77079400 | -0.46164700 | -2.09651800 |
| H | -4.02683300 | -0.09078600 | -2.72344400 |
| H | -5.77540700 | 0.37849800  | -0.30735800 |
| H | 1.34250200  | -1.14366400 | 1.11723800  |
| H | 3.41644100  | 0.08744300  | 2.95231400  |
| C | -4.70610600 | -1.47041700 | 3.39490500  |
| H | -5.74469200 | -1.64281300 | 3.67997200  |
| H | -4.23247600 | -0.76258100 | 4.07907000  |
| H | -4.15097700 | -2.41238000 | 3.45836300  |
| C | -4.63499200 | -0.96105500 | 1.95941100  |
| O | -3.44828800 | -0.49963800 | 1.68116500  |
| O | -5.61104200 | -1.04050900 | 1.21000000  |

PO-Co<sup>III</sup>-OAc + H<sub>2</sub>O-Co<sup>III</sup>-OH bimetallic PO ring-opening in the middle carbon and subsequent hydration

**PO-Co<sup>III</sup>-OAc + H<sub>2</sub>O-Co<sup>III</sup>-OH bimetallic PO ring-opening in the middle carbon**

PO-Co<sup>III</sup>-OAc + H<sub>2</sub>O-Co<sup>III</sup>-OH = OAc-Co<sup>III</sup>-PO-OH-Co<sup>III</sup>-H<sub>2</sub>O

Charge: 0

Spin Multiplicity: 1

Sum of electronic and thermal Free Energies (a.u.): -2932.015019

Thermal correction to Gibbs Free Energy (a.u.): 0.828307

Imaginary frequencies: -350.91

Calculation of single point energy based on the optimized structure, Et = -5409.3181441 a.u.

|    |             |             |             |
|----|-------------|-------------|-------------|
| C  | -7.47122700 | 1.64001300  | 2.85894800  |
| C  | -7.15765400 | 0.62450500  | 3.78372900  |
| C  | -6.83090100 | 1.71821900  | 1.63665700  |
| H  | -8.22743900 | 2.37882100  | 3.11016500  |
| C  | -6.19267100 | -0.30195900 | 3.44654200  |
| H  | -7.66467600 | 0.57420000  | 4.74097500  |
| C  | -5.83167300 | 0.78155200  | 1.26518200  |
| H  | -7.06725200 | 2.50034900  | 0.92290200  |
| C  | -5.51500600 | -0.25065900 | 2.20495100  |
| H  | -5.93247200 | -1.09648000 | 4.14231000  |
| O  | -5.28075300 | 0.89816500  | 0.08463200  |
| C  | -4.53138600 | -1.25758400 | 1.93912600  |
| Co | -3.75062100 | -0.05673300 | -0.53126700 |
| N  | -3.80525300 | -1.35396100 | 0.87580400  |
| H  | -4.39414500 | -1.99950600 | 2.72831200  |
| N  | -2.33888100 | -1.09089700 | -1.24051700 |
| C  | -2.72420000 | -2.34808600 | 0.76511900  |
| C  | -1.40742700 | -0.63179900 | -2.00856400 |
| C  | -2.38678200 | -2.46356300 | -0.72867200 |
| C  | -2.99631100 | -3.73273000 | 1.35838100  |
| H  | -0.56434600 | -1.27027400 | -2.24835200 |
| C  | -1.42005500 | 0.67535700  | -2.60636900 |
| C  | -1.15561000 | -3.33749300 | -0.94961900 |
| C  | -1.77574400 | -4.64191000 | 1.13763300  |
| H  | -3.88493000 | -4.16008200 | 0.87585300  |
| H  | -3.21055600 | -3.66630400 | 2.42972800  |
| C  | -0.25720500 | 1.12546300  | -3.27156500 |
| C  | -2.60676700 | 1.47218300  | -2.61766700 |
| C  | -1.38506200 | -4.72805100 | -0.34301600 |
| H  | -0.92743000 | -3.42748600 | -2.01442000 |
| H  | -0.28083500 | -2.87271400 | -0.48340500 |
| H  | -1.98258700 | -5.64019000 | 1.53746700  |
| H  | -0.92778000 | -4.24319500 | 1.71087900  |
| C  | -0.26035600 | 2.31319000  | -3.98029800 |
| H  | 0.65466400  | 0.55012200  | -3.16075400 |
| C  | -2.58157800 | 2.67867900  | -3.35314200 |
| O  | -3.72526400 | 1.12281100  | -2.01555500 |

|    |             |             |             |
|----|-------------|-------------|-------------|
| H  | -2.18128100 | -5.24127200 | -0.89884100 |
| H  | -0.47662500 | -5.32628900 | -0.46461400 |
| C  | -1.43727000 | 3.08061100  | -4.02433400 |
| H  | 0.64153200  | 2.65572800  | -4.47536300 |
| H  | -3.48791200 | 3.27484900  | -3.37079700 |
| H  | -1.44890900 | 4.01550500  | -4.57852700 |
| O  | -2.60527300 | 0.98874600  | 0.46985200  |
| H  | -2.99277200 | 1.86851200  | 0.35557700  |
| O  | -5.13614000 | -1.03128700 | -1.71136800 |
| H  | -4.92178400 | -0.44025500 | -2.46088700 |
| H  | -5.89513900 | -0.59006900 | -1.28729600 |
| C  | -0.46254000 | 1.33798900  | 0.67023200  |
| C  | -0.03662700 | 0.05454200  | 1.21758300  |
| O  | 1.21841500  | 0.70197800  | 1.25901900  |
| H  | -0.28499700 | 1.47256400  | -0.38809400 |
| H  | -0.07737200 | -0.78652200 | 0.52609900  |
| H  | -0.41939000 | -0.20213700 | 2.21225400  |
| C  | -0.68703700 | 2.54859500  | 1.51509400  |
| H  | -1.35913500 | 3.24229500  | 1.00470900  |
| H  | -1.10370300 | 2.28542900  | 2.48993100  |
| H  | 0.26329100  | 3.07118500  | 1.65064300  |
| C  | 1.26843200  | 5.39204500  | -0.83104000 |
| C  | 2.02329900  | 5.81952100  | 0.28059200  |
| C  | 1.29152700  | 4.07793100  | -1.25289500 |
| H  | 0.65154600  | 6.10890600  | -1.36741400 |
| C  | 2.79410800  | 4.88989800  | 0.94805100  |
| H  | 1.99901700  | 6.85526600  | 0.60163700  |
| C  | 2.07339000  | 3.09369000  | -0.58170200 |
| H  | 0.70650400  | 3.74715100  | -2.10227700 |
| C  | 2.83378200  | 3.53141300  | 0.55275100  |
| H  | 3.38737100  | 5.19097300  | 1.80911000  |
| O  | 2.04198400  | 1.87440600  | -1.02294200 |
| C  | 3.64157000  | 2.63421900  | 1.32493900  |
| Co | 2.62860100  | 0.36141200  | -0.03877700 |
| N  | 3.71090700  | 1.35642900  | 1.17304300  |
| H  | 4.23268300  | 3.09486100  | 2.11765800  |
| N  | 3.11183500  | -1.16378700 | 1.00362600  |
| C  | 4.52840100  | 0.48601400  | 2.02309400  |
| C  | 3.06326900  | -2.38290600 | 0.59935300  |
| C  | 3.66211100  | -0.76051400 | 2.30130600  |
| C  | 5.05203000  | 1.08919600  | 3.32472700  |
| H  | 3.44653100  | -3.17064300 | 1.24801800  |
| C  | 2.58906900  | -2.79848000 | -0.69455100 |
| C  | 4.46029400  | -1.81830500 | 3.05992000  |
| C  | 5.84629400  | 0.03236000  | 4.10661800  |
| H  | 4.21141600  | 1.45438600  | 3.93139300  |
| H  | 5.69896100  | 1.94786100  | 3.11520700  |
| C  | 2.80511400  | -4.13378600 | -1.08986400 |
| C  | 1.91959300  | -1.88787800 | -1.57434800 |
| C  | 5.00988100  | -1.22583500 | 4.36573500  |
| H  | 3.83184000  | -2.68672200 | 3.28867300  |
| H  | 5.28324400  | -2.16043800 | 2.42089600  |
| H  | 6.19747000  | 0.45630900  | 5.05366300  |
| H  | 6.73944700  | -0.24045400 | 3.53017800  |
| C  | 2.43287000  | -4.58918600 | -2.34360500 |
| H  | 3.29737700  | -4.80583100 | -0.39044000 |
| C  | 1.60787400  | -2.36539100 | -2.87592500 |
| O  | 1.53530800  | -0.69438800 | -1.21471400 |
| H  | 4.17079700  | -0.97305900 | 5.02849600  |
| H  | 5.60837800  | -1.97825900 | 4.89052600  |
| C  | 1.84939300  | -3.67973400 | -3.24240100 |
| H  | 2.61695200  | -5.61680800 | -2.63730700 |
| H  | 1.17613800  | -1.66511200 | -3.58277600 |
| H  | 1.59007800  | -4.00722500 | -4.24584100 |
| H  | 5.35828600  | 0.13903600  | 1.39778000  |
| H  | 2.80519900  | -0.43241500 | 2.90571800  |
| H  | -3.25251100 | -2.93481500 | -1.21576600 |
| H  | -1.84891300 | -1.91575600 | 1.26621700  |
| C  | 5.69739700  | -0.74548200 | -2.67203000 |

|   |            |             |             |
|---|------------|-------------|-------------|
| H | 5.06246800 | -1.44778400 | -3.22274600 |
| H | 6.70819300 | -1.14928600 | -2.59885200 |
| H | 5.70005300 | 0.19617500  | -3.22651500 |
| C | 5.10453200 | -0.54453800 | -1.28009300 |
| O | 4.00546100 | 0.14648700  | -1.32484000 |
| O | 5.65387100 | -1.03464400 | -0.28678100 |

**PO-Co<sup>III</sup>-OAc + H<sub>2</sub>O-Co<sup>III</sup>-OH bimetallic PO ring-opening in the middle carbon**

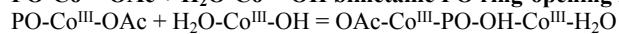

Charge: 0

Spin Multiplicity: 1

Sum of electronic and thermal Free Energies (a.u.): -2932.036384

Thermal correction to Gibbs Free Energy (a.u.): 0.825512

No imaginary frequency

Calculation of single point energy based on the optimized structure, Er = -5409.3391276 a.u.

|    |             |             |             |
|----|-------------|-------------|-------------|
| C  | -7.78812000 | 1.44805300  | 3.14731300  |
| C  | -7.75707500 | 0.11403600  | 3.59996400  |
| C  | -6.95347500 | 1.87990500  | 2.13453200  |
| H  | -8.47760700 | 2.15314500  | 3.60391800  |
| C  | -6.86999300 | -0.76295100 | 3.01059900  |
| H  | -8.41453300 | -0.21376600 | 4.39769300  |
| C  | -6.03281300 | 0.99862500  | 1.50710500  |
| H  | -6.97130000 | 2.90709900  | 1.78560900  |
| C  | -6.00188900 | -0.35604900 | 1.96960200  |
| H  | -6.82222000 | -1.79705800 | 3.34480500  |
| O  | -5.29062700 | 1.46662700  | 0.53900000  |
| C  | -5.09871300 | -1.33124800 | 1.43295300  |
| Co | -3.92592400 | 0.52481700  | -0.39645100 |
| N  | -4.25386800 | -1.13924900 | 0.47686800  |
| H  | -5.13748600 | -2.31524200 | 1.90316800  |
| N  | -2.68611800 | -0.44010000 | -1.47077400 |
| C  | -3.24716400 | -2.14305000 | 0.10327800  |
| C  | -1.69395500 | 0.08244000  | -2.11175300 |
| C  | -2.92463600 | -1.88385500 | -1.37709900 |
| C  | -3.61331000 | -3.60821600 | 0.34721500  |
| H  | -0.96860100 | -0.57583500 | -2.58849200 |
| C  | -1.46874000 | 1.49291200  | -2.25699700 |
| C  | -1.81810700 | -2.80170400 | -1.88595400 |
| C  | -2.49885800 | -4.53023900 | -0.17088500 |
| H  | -4.55705800 | -3.83259200 | -0.16751700 |
| H  | -3.77405000 | -3.79432500 | 1.41409200  |
| C  | -0.25322200 | 1.92116800  | -2.83682500 |
| C  | -2.45013800 | 2.45403600  | -1.85839600 |
| C  | -2.19251300 | -4.26950800 | -1.64910900 |
| H  | -1.63327000 | -2.62930000 | -2.94938700 |
| H  | -0.88053500 | -2.57889600 | -1.36532000 |
| H  | -2.78397500 | -5.57608600 | -0.01493400 |
| H  | -1.58781400 | -4.36036900 | 0.41902700  |
| C  | 0.02084900  | 3.26435000  | -3.01618500 |
| H  | 0.49910200  | 1.17700000  | -3.07531400 |
| C  | -2.14142800 | 3.82266300  | -2.05527700 |
| O  | -3.62187100 | 2.13838800  | -1.36014000 |
| H  | -3.07185300 | -4.52847900 | -2.25443700 |
| H  | -1.37026300 | -4.90609400 | -1.98803600 |
| C  | -0.93819700 | 4.21348700  | -2.61923100 |
| H  | 0.96437900  | 3.57748600  | -3.44856800 |
| H  | -2.88494500 | 4.55028200  | -1.74710400 |
| H  | -0.73164000 | 5.27256800  | -2.74888400 |
| O  | -2.63752100 | 0.88613300  | 0.84470000  |
| H  | -2.89730000 | 1.76559100  | 1.15486500  |
| O  | -5.42117100 | 0.30057700  | -1.84909800 |
| H  | -5.04734000 | 1.06232300  | -2.33376400 |
| H  | -6.10035900 | 0.71179800  | -1.28509500 |
| C  | 0.51002800  | 1.79946300  | 0.45235200  |
| C  | 0.06354100  | 0.49910900  | 0.92909600  |
| O  | 1.47533200  | 0.88529800  | 1.10034900  |
| H  | 0.71773200  | 1.88657900  | -0.60535300 |
| H  | -0.08213400 | -0.29472100 | 0.20899700  |
| H  | -0.47224700 | 0.42022400  | 1.86637900  |
| C  | 0.24244500  | 3.07921600  | 1.18148700  |

|    |             |             |             |
|----|-------------|-------------|-------------|
| H  | -0.66237300 | 3.53015700  | 0.76133900  |
| H  | 0.09115100  | 2.90717800  | 2.25076000  |
| H  | 1.07173800  | 3.77834200  | 1.04061400  |
| C  | 3.85248100  | 5.26694200  | -0.53614900 |
| C  | 4.55368800  | 5.31071700  | 0.68712200  |
| C  | 3.37622200  | 4.07659100  | -1.04686900 |
| H  | 3.68185200  | 6.18742100  | -1.08855200 |
| C  | 4.75577800  | 4.13196700  | 1.37395300  |
| H  | 4.92527900  | 6.25192700  | 1.07719400  |
| C  | 3.56665100  | 2.84373300  | -0.35946400 |
| H  | 2.83127200  | 4.03761600  | -1.98316100 |
| C  | 4.27396200  | 2.89340900  | 0.88649600  |
| H  | 5.29345600  | 4.13733700  | 2.31973500  |
| O  | 3.08606000  | 1.76424100  | -0.89348500 |
| C  | 4.51359000  | 1.72270800  | 1.67505400  |
| Co | 2.93182800  | 0.09119400  | -0.02988300 |
| N  | 4.08416000  | 0.53230300  | 1.42052200  |
| H  | 5.10851900  | 1.87500000  | 2.57649600  |
| N  | 2.64744100  | -1.55889600 | 0.87687200  |
| C  | 4.36227900  | -0.62505500 | 2.27997200  |
| C  | 2.25778100  | -2.64570500 | 0.30862000  |
| C  | 3.07470300  | -1.47456500 | 2.27663400  |
| C  | 4.81361400  | -0.33034300 | 3.70916800  |
| H  | 2.24374800  | -3.56843300 | 0.88853400  |
| C  | 1.86885600  | -2.75149800 | -1.07196300 |
| C  | 3.29531900  | -2.79751300 | 3.00607900  |
| C  | 5.02222600  | -1.64857800 | 4.47049500  |
| H  | 4.06023200  | 0.28707000  | 4.21797200  |
| H  | 5.75064100  | 0.23636900  | 3.70691600  |
| C  | 1.68953400  | -4.03752800 | -1.62340000 |
| C  | 1.65100100  | -1.58632800 | -1.87924300 |
| C  | 3.76606700  | -2.52706500 | 4.44281800  |
| H  | 2.37074100  | -3.38565100 | 3.02742900  |
| H  | 4.04879900  | -3.37792800 | 2.46019600  |
| H  | 5.31424800  | -1.43759600 | 5.50480500  |
| H  | 5.85517200  | -2.19598100 | 4.01114200  |
| C  | 1.34131400  | -4.21378000 | -2.95106000 |
| H  | 1.85100700  | -4.90150700 | -0.98280200 |
| C  | 1.31660700  | -1.79970900 | -3.24378700 |
| O  | 1.69382100  | -0.37174600 | -1.41341500 |
| H  | 2.96054300  | -2.02637400 | 4.99716100  |
| H  | 3.95597000  | -3.47629100 | 4.95497700  |
| C  | 1.16637300  | -3.07544900 | -3.75968600 |
| H  | 1.22526400  | -5.20911400 | -3.36583200 |
| H  | 1.20025400  | -0.92432300 | -3.87370100 |
| H  | 0.91658000  | -3.19752400 | -4.81034900 |
| H  | 5.11599500  | -1.22085600 | 1.75440800  |
| H  | 2.29972000  | -0.89469700 | 2.79834900  |
| H  | -3.84602200 | -2.08020000 | -1.94434300 |
| H  | -2.34335100 | -1.89239800 | 0.67714000  |
| C  | 5.79818400  | -1.87758600 | -2.33661400 |
| H  | 5.07124400  | -2.28396000 | -3.04774900 |
| H  | 6.59139300  | -2.60746000 | -2.16957600 |
| H  | 6.20402500  | -0.96146400 | -2.77209700 |
| C  | 5.07890300  | -1.57477100 | -1.02620000 |
| O  | 4.29832100  | -0.53922200 | -1.14699200 |
| O  | 5.25010500  | -2.28506300 | -0.03158500 |

**PO-Co<sup>III</sup>-OAc + H<sub>2</sub>O-Co<sup>III</sup>-OH bimetallic PO ring-opening in the middle carbon**

PO-Co<sup>III</sup>-OAc + H<sub>2</sub>O-Co<sup>III</sup>-OH = OAc-Co<sup>III</sup>-PO-OH-Co<sup>III</sup>-H<sub>2</sub>O

Charge: 0

Spin Multiplicity: 1

Sum of electronic and thermal Free Energies (a.u.): -2932.038962

Thermal correction to Gibbs Free Energy (a.u.): 0.833329

No imaginary frequency

Calculation of single point energy based on the optimized structure, Ep = -5409.3519046 a.u.

|   |             |            |            |
|---|-------------|------------|------------|
| C | -7.87525400 | 1.28522300 | 2.33997800 |
| C | -7.87246400 | 0.04163000 | 3.00058500 |
| C | -6.88163200 | 1.62007700 | 1.43829100 |
| H | -8.67065600 | 1.99742400 | 2.54060500 |

|    |             |             |             |
|----|-------------|-------------|-------------|
| C  | -6.84963400 | -0.84622900 | 2.73813100  |
| H  | -8.65608600 | -0.20920500 | 3.70664000  |
| C  | -5.82412200 | 0.72324900  | 1.14489200  |
| H  | -6.87779000 | 2.57814100  | 0.92950900  |
| C  | -5.81875700 | -0.53796900 | 1.81827500  |
| H  | -6.81838700 | -1.80860000 | 3.24326700  |
| O  | -4.91815400 | 1.10061100  | 0.27106500  |
| C  | -4.76960800 | -1.50065500 | 1.63815900  |
| Co | -3.53352000 | 0.01456500  | -0.44806400 |
| N  | -3.78942000 | -1.40773300 | 0.80469400  |
| H  | -4.81684700 | -2.37929200 | 2.28235000  |
| N  | -2.17628900 | -1.06275700 | -1.19503800 |
| C  | -2.68335500 | -2.37681000 | 0.75198100  |
| C  | -1.24200700 | -0.63699000 | -1.98354600 |
| C  | -2.26083600 | -2.45476400 | -0.72187400 |
| C  | -2.94908000 | -3.76706900 | 1.32750700  |
| H  | -0.43775900 | -1.31381000 | -2.23802800 |
| C  | -1.18871900 | 0.66574500  | -2.58076800 |
| C  | -1.00617900 | -3.30959700 | -0.88762600 |
| C  | -1.69562400 | -4.64196400 | 1.15894100  |
| H  | -3.80326800 | -4.22209500 | 0.80778500  |
| H  | -3.20750800 | -3.70336100 | 2.38981500  |
| C  | -0.03744100 | 1.01723000  | -3.32215300 |
| C  | -2.29473800 | 1.55970700  | -2.51796000 |
| C  | -1.24155800 | -4.70826800 | -0.30356500 |
| H  | -0.72698000 | -3.39284000 | -1.94063800 |
| H  | -0.16785300 | -2.82263900 | -0.38046200 |
| H  | -1.89584700 | -5.64666000 | 1.54535500  |
| H  | -0.88566000 | -4.22338700 | 1.77020100  |
| C  | -0.00408600 | 2.18226200  | -4.06446400 |
| H  | 0.83344100  | 0.37699600  | -3.25214000 |
| C  | -2.23722700 | 2.74532500  | -3.27859400 |
| O  | -3.39114400 | 1.31652200  | -1.81146700 |
| H  | -2.00371700 | -5.23102100 | -0.89760100 |
| H  | -0.31930500 | -5.29097300 | -0.38974300 |
| C  | -1.12074900 | 3.03440400  | -4.05077600 |
| H  | 0.88679000  | 2.45140500  | -4.61999500 |
| H  | -3.08942100 | 3.41533000  | -3.23984400 |
| H  | -1.10139600 | 3.95494000  | -4.62753900 |
| O  | -2.40549300 | 0.90973700  | 0.82403800  |
| H  | -2.93778900 | 1.71090300  | 0.96381500  |
| O  | -4.86911800 | -0.72061100 | -1.73585500 |
| H  | -4.64870700 | 0.00365600  | -2.36640400 |
| H  | -5.71962800 | -0.45528800 | -1.34867500 |
| C  | -0.95547100 | 1.28946600  | 0.80467300  |
| C  | -0.14009300 | 0.06857100  | 1.26840300  |
| O  | 1.17686400  | 0.38896800  | 1.49935500  |
| H  | -0.69037400 | 1.55729100  | -0.21562500 |
| H  | -0.25068900 | -0.72842900 | 0.52165900  |
| H  | -0.61465100 | -0.28576200 | 2.20793200  |
| C  | -0.81602000 | 2.47203200  | 1.74063200  |
| H  | -1.31308400 | 3.36517500  | 1.34736000  |
| H  | -1.22015600 | 2.22489300  | 2.72933900  |
| H  | 0.24597000  | 2.69180100  | 1.84862700  |
| C  | 0.75504100  | 5.25965000  | -0.70531300 |
| C  | 1.61668700  | 5.76718400  | 0.28728700  |
| C  | 0.77259800  | 3.92450700  | -1.05622400 |
| H  | 0.05891600  | 5.92876200  | -1.20600900 |
| C  | 2.48323800  | 4.89190100  | 0.91155300  |
| H  | 1.59845200  | 6.81832300  | 0.55470700  |
| C  | 1.65838400  | 2.99608600  | -0.43339000 |
| H  | 0.10618600  | 3.53928700  | -1.81553900 |
| C  | 2.52342200  | 3.51677900  | 0.58569100  |
| H  | 3.15557000  | 5.25339900  | 1.68722900  |
| O  | 1.60946900  | 1.75525400  | -0.79911600 |
| C  | 3.42161100  | 2.68319500  | 1.33249600  |
| Co | 2.46638700  | 0.30877500  | 0.09491900  |
| N  | 3.53228100  | 1.40574600  | 1.23292800  |
| H  | 4.04894100  | 3.20416300  | 2.05759400  |



|   |             |             |             |
|---|-------------|-------------|-------------|
| N | 3.24345700  | -1.16204500 | 1.03014700  |
| C | 4.46731300  | 0.62139100  | 2.04819300  |
| C | 3.38113100  | -2.35261500 | 0.57472200  |
| C | 3.75942300  | -0.72040700 | 2.32467100  |
| C | 4.94336900  | 1.26558500  | 3.34946200  |
| H | 3.91719000  | -3.09188800 | 1.17060600  |
| C | 2.92338100  | -2.78684100 | -0.72201100 |
| C | 4.68440200  | -1.68663100 | 3.05981000  |
| C | 5.85875900  | 0.29707800  | 4.11310300  |
| H | 4.07482600  | 1.53238500  | 3.96753700  |
| H | 5.49248400  | 2.19062000  | 3.14388000  |
| C | 3.37091100  | -4.03075300 | -1.20391400 |
| C | 2.04971900  | -1.97501800 | -1.51595200 |
| C | 5.17226700  | -1.04946400 | 4.36861600  |
| H | 4.16393800  | -2.62658400 | 3.27781900  |
| H | 5.54041200  | -1.92280600 | 2.41522000  |
| H | 6.17209600  | 0.75003400  | 5.06036000  |
| H | 6.77022300  | 0.12992700  | 3.52462700  |
| C | 3.02891300  | -4.49138400 | -2.46565800 |
| H | 4.02046500  | -4.62596800 | -0.56570100 |
| C | 1.76147700  | -2.45050500 | -2.82528100 |
| O | 1.47873800  | -0.88772000 | -1.07519000 |
| H | 4.31389200  | -0.89778900 | 5.03738200  |
| H | 5.85617100  | -1.73291400 | 4.88400700  |
| C | 2.22949000  | -3.67428900 | -3.27972400 |
| H | 3.39342500  | -5.44737400 | -2.82568900 |
| H | 1.17352500  | -1.81830100 | -3.48223400 |
| H | 1.98152900  | -3.99584000 | -4.28824700 |
| H | 5.31434800  | 0.38747800  | 1.39254800  |
| H | 2.87030700  | -0.50453900 | 2.93039800  |
| H | -3.09241000 | -2.91703500 | -1.27406800 |
| H | -1.85513600 | -1.91814800 | 1.30426700  |
| C | 5.46476200  | -0.35655900 | -2.80517400 |
| H | 4.89296000  | -1.16113600 | -3.28051600 |
| H | 6.52633100  | -0.60899400 | -2.81768100 |
| H | 5.28349900  | 0.55640800  | -3.37854800 |
| C | 4.96810700  | -0.19354100 | -1.36883200 |
| O | 3.78016600  | 0.31872000  | -1.32162300 |
| O | 5.67530700  | -0.56378300 | -0.42186100 |

**subsequent hydration**

OAc-Co<sup>III</sup>-PO-OH-Co<sup>III</sup>-H<sub>2</sub>O + H<sub>2</sub>O = PG + Co<sup>III</sup>(salen)-OAc + H<sub>2</sub>O-Co<sup>III</sup>-OH

Charge: 0

Spin Multiplicity: 1

Sum of electronic and thermal Free Energies (a.u.): -3008.425129

Thermal correction to Gibbs Free Energy (a.u.): 0.856182

Imaginary frequencies: -385.98

Calculation of single point energy based on the optimized structure, Et = -5485.7921028 a.u.

|    |            |             |             |
|----|------------|-------------|-------------|
| C  | 5.87353400 | -2.54883600 | -3.38167400 |
| C  | 4.87455800 | -3.51916200 | -3.18389500 |
| C  | 5.96072600 | -1.43385900 | -2.56547100 |
| H  | 6.58752100 | -2.67028400 | -4.19177100 |
| C  | 3.97611800 | -3.34703500 | -2.14901300 |
| C  | 5.04550000 | -1.22773400 | -1.50666400 |
| C  | 4.03512900 | -2.21787300 | -1.30110200 |
| H  | 3.19543500 | -4.07905500 | -1.96884500 |
| O  | 5.19353700 | -0.15978200 | -0.75377300 |
| C  | 3.09095700 | -2.13921100 | -0.22499600 |
| Co | 3.82009900 | 0.54417400  | 0.34294500  |
| N  | 2.98338200 | -1.15188600 | 0.60351000  |
| H  | 2.41263800 | -2.98796400 | -0.11305300 |
| N  | 2.57178900 | 1.18184300  | 1.63471200  |
| C  | 1.92505800 | -1.14325800 | 1.62991100  |
| C  | 2.17798700 | 2.40225700  | 1.75834700  |
| C  | 2.16794400 | 0.08488100  | 2.51571400  |
| C  | 1.88230800 | -2.39017300 | 2.51746000  |
| H  | 1.40436400 | 2.63631300  | 2.49109500  |
| C  | 2.69123400 | 3.49488800  | 0.97731600  |
| C  | 0.97944500 | 0.29893500  | 3.44775500  |
| C  | 0.76530000 | -2.24137900 | 3.56045200  |

|    |             |             |             |
|----|-------------|-------------|-------------|
| H  | 2.85884500  | -2.50889900 | 3.00503800  |
| H  | 1.70133900  | -3.28452100 | 1.91646400  |
| C  | 1.99938800  | 4.72613300  | 0.99769400  |
| C  | 3.90243500  | 3.36428000  | 0.22408500  |
| C  | 0.85860200  | -0.93444500 | 4.36075000  |
| H  | 1.11392400  | 1.19550800  | 4.06274200  |
| H  | 0.07266600  | 0.43251200  | 2.84499000  |
| H  | 0.77252300  | -3.09952700 | 4.24120600  |
| H  | -0.19214400 | -2.26276200 | 3.03514200  |
| C  | 2.45772700  | 5.81846800  | 0.28690000  |
| H  | 1.07987700  | 4.79401900  | 1.57346100  |
| C  | 4.35728300  | 4.50538300  | -0.47899900 |
| O  | 4.62128200  | 2.26405900  | 0.17727700  |
| H  | 1.73566900  | -0.96945200 | 5.02029500  |
| H  | -0.01592700 | -0.83080000 | 5.01216100  |
| C  | 3.64999800  | 5.69584400  | -0.44966000 |
| H  | 4.02318200  | 6.54813500  | -1.01072500 |
| O  | 2.76265600  | 0.85184700  | -1.14151800 |
| H  | 3.33101600  | 1.43068800  | -1.67099700 |
| O  | 5.24370800  | 0.27169500  | 1.80035200  |
| H  | 5.54824600  | 1.19748100  | 1.75381400  |
| H  | 5.83025400  | -0.19860900 | 1.17520000  |
| H  | 0.95817900  | -1.00856500 | 1.12489000  |
| H  | 3.05888600  | -0.12589500 | 3.12396000  |
| C  | 0.79871900  | 1.61993700  | -1.24535200 |
| C  | 0.13335800  | 0.26412600  | -1.11473500 |
| O  | -0.76641100 | 0.22670200  | -0.02808400 |
| H  | 1.09963200  | 2.15690700  | -0.36854200 |
| H  | 0.93013500  | -0.47643800 | -1.00581600 |
| H  | -0.36806200 | 0.04626200  | -2.06243600 |
| C  | 1.06017000  | 2.20438200  | -2.60003700 |
| H  | 0.11337700  | 2.42450800  | -3.09757700 |
| H  | 1.65268000  | 3.11951300  | -2.53977600 |
| H  | 1.58196100  | 1.46541600  | -3.21535900 |
| O  | -0.99179700 | 2.58215400  | -0.83011000 |
| H  | -1.08898400 | 1.80666600  | -0.19160700 |
| H  | -1.57617200 | 2.22307100  | -1.53307700 |
| H  | 5.27755100  | 4.40817200  | -1.04527700 |
| H  | 1.90877900  | 6.75339600  | 0.29571700  |
| H  | 6.72708900  | -0.68101300 | -2.71699700 |
| H  | 4.81233600  | -4.38636800 | -3.83215000 |
| C  | 0.54527400  | -4.65369100 | -1.59629100 |
| C  | 0.46089500  | -5.10834400 | -0.26193900 |
| C  | -0.14670700 | -3.53745100 | -2.01944400 |
| H  | 1.15815300  | -5.19916200 | -2.30964500 |
| C  | -0.35460300 | -4.41915100 | 0.61591300  |
| H  | 1.00150100  | -5.99263000 | 0.05765700  |
| C  | -0.99350300 | -2.80139100 | -1.13516800 |
| H  | -0.08731500 | -3.18922900 | -3.04500700 |
| C  | -1.07666300 | -3.26984600 | 0.22037400  |
| H  | -0.45633700 | -4.75986600 | 1.64444700  |
| O  | -1.63701400 | -1.78652400 | -1.60134800 |
| C  | -1.89966700 | -2.62157300 | 1.20193000  |
| Co | -2.51110100 | -0.46861800 | -0.54762700 |
| N  | -2.52320000 | -1.50582700 | 1.05010700  |
| H  | -1.98041400 | -3.13539100 | 2.16094300  |
| N  | -3.38967300 | 0.87193000  | 0.48956700  |
| C  | -3.33635600 | -0.88949700 | 2.10668400  |
| C  | -4.25784400 | 1.69517600  | 0.01358700  |
| C  | -3.18576700 | 0.63533700  | 1.91645600  |
| C  | -3.01425200 | -1.29429000 | 3.54412200  |
| H  | -4.85316000 | 2.29375100  | 0.70229600  |
| C  | -4.53785700 | 1.86410000  | -1.38802800 |
| C  | -4.09533300 | 1.39581300  | 2.87781700  |
| C  | -3.90368100 | -0.51723500 | 4.52585900  |
| H  | -1.95864000 | -1.08540700 | 3.75824200  |
| H  | -3.16825900 | -2.36882000 | 3.68896100  |
| C  | -5.68866900 | 2.58480400  | -1.76501300 |
| C  | -3.67517400 | 1.31848500  | -2.38882300 |

|   |             |             |             |
|---|-------------|-------------|-------------|
| C | -3.77526300 | 0.99717500  | 4.32503000  |
| H | -3.97033200 | 2.47688800  | 2.74738900  |
| H | -5.13924400 | 1.15077700  | 2.64749800  |
| H | -3.64437000 | -0.78853800 | 5.55520400  |
| H | -4.94906300 | -0.81377900 | 4.37320900  |
| C | -6.02134600 | 2.76073100  | -3.09687100 |
| H | -6.32812600 | 2.98769300  | -0.98309300 |
| C | -4.02937500 | 1.52265100  | -3.74164600 |
| O | -2.54659300 | 0.70966800  | -2.09566000 |
| H | -2.75054200 | 1.31087400  | 4.56949000  |
| H | -4.43913300 | 1.52988000  | 5.01420300  |
| C | -5.17619700 | 2.22196500  | -4.08300500 |
| H | -6.91833100 | 3.30308400  | -3.37570600 |
| H | -3.37628700 | 1.09986000  | -4.49762900 |
| H | -5.42756600 | 2.35066500  | -5.13253900 |
| H | -4.37954700 | -1.11707000 | 1.85596200  |
| H | -2.13726000 | 0.89330700  | 2.12309400  |
| C | -6.38128100 | -1.47845400 | -1.84871400 |
| H | -6.45277800 | -0.61158800 | -2.51506100 |
| H | -7.36161600 | -1.68049300 | -1.41407400 |
| H | -6.04238900 | -2.32659100 | -2.44801200 |
| C | -5.36999700 | -1.15247000 | -0.75425300 |
| O | -4.15020500 | -1.21472500 | -1.19006200 |
| O | -5.75734400 | -0.83826800 | 0.37929400  |

**subsequent hydration**

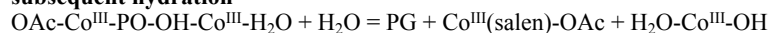

Charge: 0

Spin Multiplicity: 1

Sum of electronic and thermal Free Energies (a.u.): -3008.469243

Thermal correction to Gibbs Free Energy (a.u.): 0.857620

No imaginary frequency

Calculation of single point energy based on the optimized structure, Er = -5485.8404768 a.u.

|    |             |             |             |
|----|-------------|-------------|-------------|
| C  | 5.94312800  | -2.57004100 | -2.95917100 |
| C  | 5.01802100  | -3.60750300 | -2.74814200 |
| C  | 5.89943500  | -1.40777400 | -2.20693000 |
| H  | 6.70465600  | -2.67600100 | -3.72678100 |
| C  | 4.05429800  | -3.45184400 | -1.77120700 |
| C  | 4.92062900  | -1.22509800 | -1.20441900 |
| C  | 3.97905100  | -2.27522400 | -0.99094600 |
| H  | 3.32290500  | -4.23129200 | -1.58718000 |
| O  | 4.95390400  | -0.10706400 | -0.50359000 |
| C  | 2.95555400  | -2.20702700 | 0.01222600  |
| Co | 3.56391800  | 0.50730600  | 0.61858400  |
| N  | 2.73022300  | -1.20242500 | 0.79445600  |
| H  | 2.30974300  | -3.08296500 | 0.09509100  |
| N  | 2.30026600  | 1.08718300  | 1.91423600  |
| C  | 1.58176500  | -1.19237700 | 1.72612500  |
| C  | 1.87729500  | 2.29530900  | 2.06050900  |
| C  | 1.84007100  | -0.05183600 | 2.71759300  |
| C  | 1.34627600  | -2.49439400 | 2.49118200  |
| H  | 1.07696200  | 2.49195100  | 2.76624300  |
| C  | 2.38396900  | 3.41352300  | 1.30622900  |
| C  | 0.63385600  | 0.17760200  | 3.62468300  |
| C  | 0.14241800  | -2.30959300 | 3.42523000  |
| H  | 2.24888700  | -2.74941400 | 3.06319200  |
| H  | 1.14574400  | -3.31631200 | 1.80100900  |
| C  | 1.64834500  | 4.61588200  | 1.31180400  |
| C  | 3.60715900  | 3.32705000  | 0.57838200  |
| C  | 0.31872500  | -1.12334300 | 4.38063900  |
| H  | 0.84447200  | 0.97783600  | 4.34311400  |
| H  | -0.22122700 | 0.49935400  | 3.02144200  |
| H  | -0.03830700 | -3.23004300 | 3.99090600  |
| H  | -0.74159300 | -2.13574900 | 2.80568600  |
| C  | 2.09048200  | 5.72703500  | 0.61597400  |
| H  | 0.70819600  | 4.63777400  | 1.85457900  |
| C  | 4.04706500  | 4.47844100  | -0.11022900 |
| O  | 4.35339900  | 2.23253800  | 0.52883200  |
| H  | 1.13389600  | -1.33868800 | 5.08458300  |
| H  | -0.58662800 | -0.98646200 | 4.98176900  |

|    |             |             |             |
|----|-------------|-------------|-------------|
| C  | 3.30224200  | 5.64896300  | -0.09021200 |
| H  | 3.66164500  | 6.51516100  | -0.63844600 |
| O  | 2.56701100  | 0.91151400  | -0.97649900 |
| H  | 3.13440200  | 1.57952800  | -1.39345700 |
| O  | 4.91242800  | 0.19378500  | 2.04737500  |
| H  | 5.19617500  | 1.12839800  | 2.09505800  |
| H  | 5.55812700  | -0.21742700 | 1.43684100  |
| H  | 0.68321700  | -0.93875800 | 1.14079800  |
| H  | 2.70140600  | -0.34317300 | 3.33538400  |
| C  | 1.14109200  | 1.33170400  | -1.07832100 |
| C  | 0.28998800  | 0.05690500  | -1.19664200 |
| O  | -0.70223200 | -0.01062700 | -0.19738400 |
| H  | 0.89317100  | 1.86219200  | -0.16440200 |
| H  | 0.96748200  | -0.80530300 | -1.13735300 |
| H  | -0.15922000 | 0.03007500  | -2.19184300 |
| C  | 1.03190500  | 2.27317300  | -2.26197000 |
| H  | -0.00755000 | 2.59649900  | -2.36007900 |
| H  | 1.65524800  | 3.16539400  | -2.12445600 |
| H  | 1.31166000  | 1.76877300  | -3.19291800 |
| O  | -0.83618500 | 2.14737900  | 1.31955300  |
| H  | -0.81859100 | 1.31471800  | 0.75586200  |
| H  | -1.36652600 | 2.75382500  | 0.78748500  |
| H  | 4.98229200  | 4.41255700  | -0.65627800 |
| H  | 1.50982900  | 6.64278200  | 0.61231600  |
| H  | 6.61085700  | -0.60432600 | -2.36571100 |
| H  | 5.05945600  | -4.51253000 | -3.34405000 |
| C  | 0.73024400  | -4.54144100 | -2.18543300 |
| C  | 0.60240900  | -5.12483300 | -0.90523700 |
| C  | 0.00499000  | -3.42324000 | -2.53990800 |
| H  | 1.40913000  | -4.98315900 | -2.91056100 |
| C  | -0.29140000 | -4.55989100 | -0.01287300 |
| H  | 1.16195000  | -6.01670300 | -0.64316600 |
| C  | -0.91644300 | -2.80754100 | -1.63697700 |
| H  | 0.09759800  | -2.97696500 | -3.52425200 |
| C  | -1.04249400 | -3.40829100 | -0.33680400 |
| H  | -0.44120200 | -5.01225100 | 0.96595400  |
| O  | -1.58331100 | -1.78213400 | -2.03848300 |
| C  | -1.99291700 | -2.91985500 | 0.62278900  |
| Co | -2.44582700 | -0.53057000 | -0.87354300 |
| N  | -2.65285400 | -1.81946800 | 0.52291200  |
| H  | -2.16409900 | -3.55613400 | 1.49314900  |
| N  | -3.28710100 | 0.68126900  | 0.33260100  |
| C  | -3.67301800 | -1.39487600 | 1.48363000  |
| C  | -3.67955100 | 1.87133000  | 0.03944700  |
| C  | -3.45140600 | 0.11350600  | 1.67593500  |
| C  | -3.74133700 | -2.13327100 | 2.81799100  |
| H  | -4.21346200 | 2.44407800  | 0.79739100  |
| C  | -3.45583700 | 2.54877300  | -1.20411200 |
| C  | -4.56178800 | 0.71837700  | 2.53499700  |
| C  | -4.86198000 | -1.53043300 | 3.67779100  |
| H  | -2.78568000 | -2.05094600 | 3.35241000  |
| H  | -3.93227500 | -3.20002300 | 2.65661500  |
| C  | -3.93713100 | 3.87337200  | -1.33295300 |
| C  | -2.74022100 | 1.93911400  | -2.28980900 |
| C  | -4.66052300 | -0.02397500 | 3.87531400  |
| H  | -4.36519300 | 1.77835200  | 2.72788000  |
| H  | -5.50115400 | 0.64112400  | 1.97676600  |
| H  | -4.90417100 | -2.04039900 | 4.64668000  |
| H  | -5.82528200 | -1.70488500 | 3.18252200  |
| C  | -3.73229600 | 4.61595000  | -2.47788700 |
| H  | -4.48287100 | 4.30292800  | -0.49521800 |
| C  | -2.54726100 | 2.73291800  | -3.46045000 |
| O  | -2.24812400 | 0.74562300  | -2.27083700 |
| H  | -3.73869300 | 0.14359900  | 4.45087400  |
| H  | -5.48034900 | 0.39374200  | 4.46975400  |
| C  | -3.02579700 | 4.02476600  | -3.54591600 |
| H  | -4.10933700 | 5.62975400  | -2.55811000 |
| H  | -2.01492100 | 2.26920300  | -4.28444500 |
| H  | -2.85868200 | 4.59334500  | -4.45737800 |

|   |             |             |             |
|---|-------------|-------------|-------------|
| H | -4.63434500 | -1.48151700 | 0.96494000  |
| H | -2.48473600 | 0.25730200  | 2.18092900  |
| C | -6.23223600 | -1.02722800 | -2.64934000 |
| H | -6.04930200 | -0.23364900 | -3.38162100 |
| H | -7.28100000 | -1.00806900 | -2.34847900 |
| H | -5.98901200 | -1.97666000 | -3.13310100 |
| C | -5.32703300 | -0.79782300 | -1.44057200 |
| O | -4.08817600 | -1.06635800 | -1.70543300 |
| O | -5.80800900 | -0.39813800 | -0.37047500 |

**subsequent hydration**

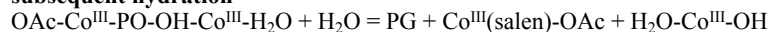

Charge: 0

Spin Multiplicity: 1

Sum of electronic and thermal Free Energies (a.u.): -3008.481987

Thermal correction to Gibbs Free Energy (a.u.): 0.855364

No imaginary frequency

Calculation of single point energy based on the optimized structure, Ep = -5485.8489332 a.u.

|    |             |             |             |
|----|-------------|-------------|-------------|
| C  | 6.21821500  | -3.00312400 | -3.15969300 |
| C  | 5.41471600  | -4.06086200 | -2.69016000 |
| C  | 6.12745200  | -1.73760300 | -2.61162100 |
| H  | 6.92149300  | -3.18206100 | -3.96861300 |
| C  | 4.52261100  | -3.80951800 | -1.66746300 |
| C  | 5.22072200  | -1.45254300 | -1.55670900 |
| C  | 4.39978000  | -2.52487300 | -1.08762700 |
| H  | 3.88744700  | -4.60507800 | -1.28658200 |
| O  | 5.20470800  | -0.23998600 | -1.06491400 |
| C  | 3.42604700  | -2.35192700 | -0.05001000 |
| Co | 4.00209000  | 0.43047800  | 0.24046100  |
| N  | 3.19821700  | -1.26089400 | 0.60089900  |
| H  | 2.82161800  | -3.22906100 | 0.17739300  |
| N  | 2.90859400  | 1.09575800  | 1.65274400  |
| C  | 2.06984600  | -1.15639800 | 1.53772700  |
| C  | 2.59329000  | 2.33634900  | 1.81749600  |
| C  | 2.39073100  | 0.00858900  | 2.48741800  |
| C  | 1.74016400  | -2.41421000 | 2.34498300  |
| H  | 1.86782100  | 2.59478400  | 2.59022600  |
| C  | 3.12307800  | 3.42924000  | 1.05619700  |
| C  | 1.19252400  | 0.32402800  | 3.38328000  |
| C  | 0.56335700  | -2.13037400 | 3.28815900  |
| H  | 2.62884100  | -2.71792800 | 2.91407200  |
| H  | 1.47169000  | -3.23878000 | 1.68094100  |
| C  | 2.54902900  | 4.70888600  | 1.22937900  |
| C  | 4.23330700  | 3.25691600  | 0.16914100  |
| C  | 0.82055100  | -0.92457900 | 4.19766400  |
| H  | 1.42484900  | 1.14932800  | 4.06485500  |
| H  | 0.34370800  | 0.63441300  | 2.75967000  |
| H  | 0.34187100  | -3.02034900 | 3.88758300  |
| H  | -0.32286200 | -1.92775000 | 2.68003200  |
| C  | 3.01068000  | 5.80636300  | 0.52992000  |
| H  | 1.71768900  | 4.81401600  | 1.92282300  |
| C  | 4.69268300  | 4.40277800  | -0.52739300 |
| O  | 4.86154700  | 2.12157300  | 0.00435600  |
| H  | 1.63669000  | -1.15572400 | 4.89499000  |
| H  | -0.06414600 | -0.71680100 | 4.81000400  |
| C  | 4.09355500  | 5.63745200  | -0.35430000 |
| H  | 4.46615000  | 6.49159100  | -0.91326600 |
| O  | 2.69858200  | 0.81450300  | -0.97511200 |
| H  | 3.19955900  | 0.89027800  | -1.79999500 |
| O  | 5.62449500  | 0.14934800  | 1.54750100  |
| H  | 5.86385500  | 1.08842400  | 1.42001000  |
| H  | 6.15863200  | -0.30736300 | 0.87389900  |
| H  | 1.19292400  | -0.87751500 | 0.93902200  |
| H  | 3.23301100  | -0.31433700 | 3.11664300  |
| C  | -0.22929400 | 2.96029500  | -0.36890900 |
| C  | -0.17578600 | 1.43329000  | -0.28953200 |
| O  | -1.31454000 | 0.99073600  | 0.51904100  |
| H  | 0.13370300  | 3.39808200  | 0.56679000  |
| H  | 0.74254100  | 1.07465700  | 0.16066600  |
| H  | -0.26475700 | 0.98506900  | -1.27637500 |

|    |             |             |             |
|----|-------------|-------------|-------------|
| C  | 0.60341500  | 3.47099500  | -1.53344900 |
| H  | 0.15872700  | 3.14311500  | -2.47963800 |
| H  | 0.65896100  | 4.56200500  | -1.52469800 |
| H  | 1.61217700  | 3.05342700  | -1.46727300 |
| O  | -1.61147200 | 3.35402300  | -0.43413700 |
| H  | -1.86105700 | 1.81104900  | 0.54875600  |
| H  | -2.00546100 | 2.85805100  | -1.18099300 |
| H  | 5.52899200  | 4.26994800  | -1.20542800 |
| H  | 2.55107600  | 6.77986900  | 0.66029000  |
| H  | 6.74333600  | -0.91973800 | -2.97076500 |
| H  | 5.49538500  | -5.05076800 | -3.12581100 |
| C  | 1.01578200  | -3.73685000 | -1.98838900 |
| C  | 0.66029200  | -4.62530700 | -0.94718000 |
| C  | 0.40507500  | -2.50894000 | -2.12102000 |
| H  | 1.79226300  | -4.01937100 | -2.69279900 |
| C  | -0.31333900 | -4.23750000 | -0.05003900 |
| H  | 1.13867800  | -5.59534100 | -0.86206700 |
| C  | -0.62872700 | -2.09417500 | -1.23073000 |
| H  | 0.67928900  | -1.82135600 | -2.91284800 |
| C  | -0.96580700 | -2.98380000 | -0.15635100 |
| H  | -0.60103200 | -4.89866900 | 0.76475600  |
| O  | -1.18911300 | -0.94793300 | -1.43539300 |
| C  | -1.92286100 | -2.63226500 | 0.84607200  |
| Co | -2.63226000 | -0.21560100 | -0.46650900 |
| N  | -2.57756900 | -1.52012700 | 0.92295100  |
| H  | -2.08756500 | -3.37976400 | 1.62513400  |
| N  | -4.02159900 | 0.59649400  | 0.55028200  |
| C  | -3.58992600 | -1.29730500 | 1.97192200  |
| C  | -5.01723800 | 1.22822700  | 0.02889000  |
| C  | -3.92939600 | 0.20283400  | 1.95544100  |
| C  | -3.20595600 | -1.71737000 | 3.39220400  |
| H  | -5.86241800 | 1.49565900  | 0.66292400  |
| C  | -5.10114100 | 1.59832100  | -1.35604200 |
| C  | -5.13498100 | 0.48708600  | 2.84705300  |
| C  | -4.38202700 | -1.43359600 | 4.34067200  |
| H  | -2.31689500 | -1.15870000 | 3.71240800  |
| H  | -2.95045700 | -2.78073100 | 3.43583900  |
| C  | -6.33263300 | 2.06847800  | -1.85991900 |
| C  | -3.95300300 | 1.54409100  | -2.20828700 |
| C  | -4.82266800 | 0.03555900  | 4.28312600  |
| H  | -5.37760300 | 1.55560300  | 2.83844200  |
| H  | -6.00497000 | -0.05547000 | 2.45758900  |
| H  | -4.10834500 | -1.70451000 | 5.36606300  |
| H  | -5.22643700 | -2.07537900 | 4.05828200  |
| C  | -6.46384500 | 2.46382400  | -3.17803200 |
| H  | -7.18823600 | 2.10271300  | -1.18965200 |
| C  | -4.10960900 | 1.97298400  | -3.54640100 |
| O  | -2.76215100 | 1.18079300  | -1.78605600 |
| H  | -4.02206000 | 0.66888200  | 4.68885200  |
| H  | -5.69891300 | 0.19251900  | 4.92073100  |
| C  | -5.33491200 | 2.41499400  | -4.01644700 |
| H  | -7.41846500 | 2.80962100  | -3.55926800 |
| H  | -3.23744100 | 1.92923100  | -4.18981500 |
| H  | -5.42474500 | 2.72542200  | -5.05393800 |
| H  | -4.48963400 | -1.82506500 | 1.64093400  |
| H  | -3.05763600 | 0.73588700  | 2.36250700  |
| C  | -5.62676500 | -2.22412400 | -2.55094300 |
| H  | -5.94291800 | -1.35833900 | -3.14272300 |
| H  | -6.49947900 | -2.82765000 | -2.29792600 |
| H  | -4.92300700 | -2.79781000 | -3.15803000 |
| C  | -4.95534700 | -1.71564300 | -1.28092600 |
| O  | -3.76391800 | -1.24943000 | -1.53399000 |
| O  | -5.54128700 | -1.74171000 | -0.19685700 |

PO-Co<sup>III</sup>-OTs + H<sub>2</sub>O-Co<sup>III</sup>-OH bimetallic PO ring-opening in the terminal carbon and subsequent hydration

**PO-Co<sup>III</sup>-OTs + H<sub>2</sub>O-Co<sup>III</sup>-OH bimetallic PO ring-opening in the terminal carbon**

PO-Co<sup>III</sup>-OTs + H<sub>2</sub>O-Co<sup>III</sup>-OH = OTs-Co<sup>III</sup>-PO-OH-Co<sup>III</sup>-H<sub>2</sub>O

Charge: 0

Spin Multiplicity: 1

Sum of electronic and thermal Free Energies (a.u.): -3598.276329

Thermal correction to Gibbs Free Energy (a.u.): 0.906373

Imaginary frequencies: -450.04

Calculation of single point energy based on the optimized structure, Et = -6075.8446775 a.u.

|    |             |             |             |
|----|-------------|-------------|-------------|
| C  | -7.13097700 | 2.88980700  | -1.40628400 |
| C  | -6.32853100 | 3.83609100  | -0.74299800 |
| C  | -6.88059700 | 1.53280400  | -1.29486300 |
| H  | -7.95932400 | 3.22737100  | -2.02347000 |
| C  | -5.28292100 | 3.38653700  | 0.04034500  |
| H  | -6.53022000 | 4.89707400  | -0.84203100 |
| C  | -5.80516700 | 1.04553500  | -0.51387100 |
| H  | -7.49338900 | 0.80125100  | -1.81106900 |
| C  | -4.99980100 | 2.00870200  | 0.17288500  |
| H  | -4.65067300 | 4.09492200  | 0.57051000  |
| O  | -5.62407600 | -0.25215500 | -0.43600500 |
| C  | -3.93110200 | 1.62420700  | 1.04812400  |
| Co | -3.96581300 | -1.03428900 | 0.07486900  |
| N  | -3.50876800 | 0.41739000  | 1.23082900  |
| H  | -3.43791500 | 2.43103400  | 1.59545500  |
| N  | -2.42646100 | -1.88101100 | 0.81082600  |
| C  | -2.34503300 | 0.15129400  | 2.09776800  |
| C  | -1.74150200 | -2.81320100 | 0.24672500  |
| C  | -2.16213300 | -1.36556700 | 2.15861000  |
| C  | -2.44690500 | 0.68886300  | 3.52950400  |
| H  | -0.83379200 | -3.16947600 | 0.73043000  |
| C  | -2.10026100 | -3.43868800 | -0.99736300 |
| C  | -0.82635500 | -1.69319400 | 2.82085500  |
| C  | -1.14996900 | 0.35904600  | 4.29013800  |
| H  | -3.31413700 | 0.22553400  | 4.01848500  |
| H  | -2.62378000 | 1.76855700  | 3.53205300  |
| C  | -1.15327100 | -4.27923400 | -1.62149700 |
| C  | -3.40036400 | -3.26653200 | -1.56954400 |
| C  | -0.83754400 | -1.14298000 | 4.25718400  |
| H  | -0.66502400 | -2.77702000 | 2.84892300  |
| H  | -0.01331200 | -1.23176900 | 2.24960900  |
| H  | -1.23420300 | 0.70251200  | 5.32673500  |
| H  | -0.30489900 | 0.89219000  | 3.84176300  |
| C  | -1.44631800 | -4.93238400 | -2.80481000 |
| H  | -0.17386200 | -4.38465100 | -1.16295400 |
| C  | -3.67325000 | -3.95380200 | -2.77699600 |
| O  | -4.35355600 | -2.53925800 | -1.02629600 |
| H  | -1.58377500 | -1.69321000 | 4.84722100  |
| H  | 0.13550900  | -1.32633600 | 4.72393600  |
| C  | -2.71931700 | -4.76131100 | -3.37649500 |
| H  | -0.70579200 | -5.56288000 | -3.28472500 |
| H  | -4.65798600 | -3.82365900 | -3.21364100 |
| H  | -2.96293900 | -5.26746500 | -4.30674500 |
| O  | -3.10842500 | -0.19161400 | -1.32428000 |
| H  | -3.49074400 | -0.60676600 | -2.11016800 |
| O  | -5.18450100 | -1.98938300 | 1.43059300  |
| H  | -5.26689500 | -2.78711800 | 0.87527000  |
| H  | -5.94598900 | -1.43695700 | 1.16345100  |
| C  | -0.30934600 | -0.63377200 | -1.97682800 |
| C  | -1.17991700 | 0.48636100  | -1.66178700 |
| O  | 0.56599600  | 0.50376500  | -1.99386300 |
| H  | -0.11792000 | -1.30795100 | -1.14873900 |
| H  | -1.20256600 | 0.86362900  | -0.65581700 |
| H  | -1.57050600 | 1.09456700  | -2.46431600 |
| C  | -0.41234200 | -1.32767000 | -3.31239100 |
| H  | 0.48445500  | -1.92717400 | -3.49399500 |
| H  | -1.27701700 | -1.99586900 | -3.32693000 |
| H  | -0.51385500 | -0.59088400 | -4.11512700 |
| C  | 2.17521700  | -4.27631700 | 0.31246100  |
| C  | 2.96360800  | -4.43760200 | -0.84269200 |
| C  | 1.73904100  | -3.02837800 | 0.71503900  |
| H  | 1.91419300  | -5.14533800 | 0.91099800  |
| C  | 3.33706900  | -3.30556000 | -1.53979700 |
| H  | 3.29594400  | -5.42106600 | -1.15617600 |
| C  | 2.04167100  | -1.84935100 | -0.02387800 |

|    |            |            |            |
|----|------------|------------|------------|
| H  | 1.1810000  | -2.9101070 | 1.6318290  |
| C  | 2.9074150  | -2.0164510 | -1.1528100 |
| H  | 3.9921020  | -3.3894180 | -2.4041630 |
| O  | 1.5318250  | -0.7163450 | 0.3633150  |
| C  | 3.4822610  | -0.8926050 | -1.8292480 |
| Co | 1.7436680  | 0.9713570  | -0.5184610 |
| N  | 3.1951830  | 0.3411980  | -1.6025110 |
| H  | 4.2605510  | -1.1249050 | -2.5570270 |
| N  | 1.9793210  | 2.6222870  | -1.4655420 |
| C  | 3.9106980  | 1.4551060  | -2.2280620 |
| C  | 1.5170000  | 3.7656520  | -1.0924160 |
| C  | 2.8199360  | 2.4525040  | -2.6527590 |
| C  | 4.8464700  | 1.1091580  | -3.3849110 |
| H  | 1.7731150  | 4.6482920  | -1.6790530 |
| C  | 0.6894530  | 3.9933520  | 0.0492600  |
| C  | 3.4253510  | 3.7231860  | -3.2500870 |
| C  | 5.4544350  | 2.3886330  | -3.9760910 |
| H  | 4.2835960  | 0.5747170  | -4.1622780 |
| H  | 5.6452200  | 0.4418870  | -3.0434030 |
| C  | 0.3769660  | 5.3319340  | 0.3820520  |
| C  | 0.1748400  | 2.9152520  | 0.8353070  |
| C  | 4.3643860  | 3.3729510  | -4.4130040 |
| H  | 2.6350830  | 4.3936330  | -3.6038990 |
| H  | 3.9833890  | 4.2580850  | -2.4703780 |
| H  | 6.1006380  | 2.1339130  | -4.8225910 |
| H  | 6.0948430  | 2.8657240  | -3.2226680 |
| C  | -0.3996290 | 5.6435500  | 1.4787140  |
| H  | 0.7745390  | 6.1240900  | -0.2484970 |
| C  | -0.5823450 | 3.2717950  | 1.9817120  |
| O  | 0.3210850  | 1.6520150  | 0.5422330  |
| H  | 3.7796720  | 2.9284230  | -5.2295950 |
| H  | 4.8147170  | 4.2879840  | -4.8114860 |
| C  | -0.8653730 | 4.5892170  | 2.2872220  |
| H  | -0.6254630 | 6.6747520  | 1.7266680  |
| H  | -0.8926000 | 2.4751600  | 2.6366790  |
| H  | -1.4411680 | 4.8122240  | 3.1819850  |
| H  | 4.4830430  | 1.9308850  | -1.4194000 |
| H  | 2.1982860  | 1.9511090  | -3.4073920 |
| H  | -2.9774230 | -1.7703670 | 2.7747680  |
| H  | -1.4571210 | 0.5727900  | 1.6084000  |
| S  | 3.1551460  | 1.2895120  | 2.2470300  |
| O  | 4.1657560  | 2.1984340  | 2.8046600  |
| O  | 1.8667000  | 1.1829350  | 2.9488730  |
| O  | 3.0236790  | 1.6431130  | 0.7369710  |
| C  | 3.8626340  | -0.3566970 | 2.2310950  |
| C  | 4.8862850  | -0.6680220 | 1.3371300  |
| C  | 3.4047610  | -1.3064020 | 3.1395180  |
| C  | 5.4253750  | -1.9510400 | 1.3332960  |
| H  | 5.2353930  | 0.0861620  | 0.6410720  |
| C  | 3.9616990  | -2.5836960 | 3.1334820  |
| H  | 2.6052190  | -1.0394110 | 3.8209100  |
| C  | 4.9664260  | -2.9309540 | 2.2230110  |
| H  | 6.2083510  | -2.2028260 | 0.6225040  |
| H  | 3.5972250  | -3.3308650 | 3.8339160  |
| C  | 5.5014530  | -4.3386980 | 2.1596310  |
| H  | 5.3833320  | -4.8569060 | 3.1156300  |
| H  | 4.9622250  | -4.9162260 | 1.3989770  |
| H  | 6.5623520  | -4.3545520 | 1.8917350  |

**PO-Co<sup>III</sup>-OTs + H<sub>2</sub>O-Co<sup>III</sup>-OH bimetallic PO ring-opening in the terminal carbon**

PO-Co<sup>III</sup>-OTs + H<sub>2</sub>O-Co<sup>III</sup>-OH = OTs-Co<sup>III</sup>-PO-OH-Co<sup>III</sup>-H<sub>2</sub>O

Charge: 0

Spin Multiplicity: 1

Sum of electronic and thermal Free Energies (a.u.): -3598.290481

Thermal correction to Gibbs Free Energy (a.u.): 0.903680

No imaginary frequency

Calculation of single point energy based on the optimized structure, Er = -6075.8587168 a.u.

|   |            |           |            |
|---|------------|-----------|------------|
| C | -6.7353920 | 3.5455910 | -1.4887390 |
| C | -5.8515050 | 4.3748700 | -0.7736160 |
| C | -6.6482440 | 2.1667410 | -1.4083710 |



|    |             |             |             |
|----|-------------|-------------|-------------|
| H  | -7.49739300 | 3.99309500  | -2.12148900 |
| C  | -4.89301000 | 3.78581900  | 0.02853000  |
| H  | -5.92468500 | 5.45441800  | -0.84852500 |
| C  | -5.66354000 | 1.53598700  | -0.60764800 |
| H  | -7.32333600 | 1.52464300  | -1.96458800 |
| C  | -4.77738300 | 2.38150900  | 0.13212800  |
| H  | -4.19979300 | 4.40152300  | 0.59726600  |
| O  | -5.63155300 | 0.22620600  | -0.56890300 |
| C  | -3.78433900 | 1.85437400  | 1.02245200  |
| Co | -4.13254100 | -0.77830900 | 0.03579000  |
| N  | -3.51922300 | 0.60387000  | 1.19845800  |
| H  | -3.20571200 | 2.59057300  | 1.58444200  |
| N  | -2.73759900 | -1.82521400 | 0.79834100  |
| C  | -2.39547900 | 0.19931800  | 2.06041700  |
| C  | -2.17855300 | -2.83637300 | 0.23026900  |
| C  | -2.39236800 | -1.33065800 | 2.13281400  |
| C  | -2.43028200 | 0.74640200  | 3.49274000  |
| H  | -1.32596100 | -3.30875900 | 0.71462500  |
| C  | -2.61373100 | -3.41292900 | -1.01171500 |
| C  | -1.08990600 | -1.79888400 | 2.78076800  |
| C  | -1.17560400 | 0.27991900  | 4.25021900  |
| H  | -3.34224000 | 0.38062800  | 3.98280800  |
| H  | -2.49060100 | 1.83870900  | 3.49889200  |
| C  | -1.78533200 | -4.37267100 | -1.63163400 |
| C  | -3.87977000 | -3.07355600 | -1.58868700 |
| C  | -1.02480400 | -1.24768900 | 4.21591100  |
| H  | -1.03401500 | -2.89345600 | 2.80657700  |
| H  | -0.24092600 | -1.42036800 | 2.20044400  |
| H  | -1.22064200 | 0.62725000  | 5.28805900  |
| H  | -0.28268200 | 0.72698500  | 3.80117500  |
| C  | -2.15453500 | -4.98372400 | -2.81560500 |
| H  | -0.82821300 | -4.60225000 | -1.17107800 |
| C  | -4.23588300 | -3.72526300 | -2.79560300 |
| O  | -4.72826100 | -2.23296400 | -1.04797600 |
| H  | -1.82007200 | -1.71480300 | 4.81310100  |
| H  | -0.07395200 | -1.53532300 | 4.67664200  |
| C  | -3.39375600 | -4.64949000 | -3.39132500 |
| H  | -1.50145300 | -5.70694400 | -3.29201400 |
| H  | -5.19359000 | -3.46792000 | -3.23592300 |
| H  | -3.69793000 | -5.12161100 | -4.32184300 |
| O  | -3.05529100 | -0.15096300 | -1.29814900 |
| H  | -3.66155100 | -0.16030700 | -2.05287200 |
| O  | -5.54290700 | -1.55090100 | 1.37201300  |
| H  | -5.69463000 | -2.31794000 | 0.78799100  |
| H  | -6.20579800 | -0.89996800 | 1.07344200  |
| C  | -0.40326600 | -0.36647700 | -1.96015500 |
| C  | -0.50536200 | 1.04949800  | -2.27135600 |
| O  | 0.83069800  | 0.46180000  | -2.09074000 |
| H  | -0.58827400 | -0.63499800 | -0.92968600 |
| H  | -0.80023400 | 1.72587100  | -1.48072700 |
| H  | -0.67456000 | 1.37049700  | -3.29598500 |
| C  | -0.52615800 | -1.44084900 | -2.99400300 |
| H  | 0.10671600  | -2.29584100 | -2.74256200 |
| H  | -1.56438300 | -1.77758400 | -3.01530700 |
| H  | -0.24307400 | -1.06620000 | -3.98217500 |
| C  | 1.74804200  | -4.38532300 | -0.05174600 |
| C  | 2.67242300  | -4.55543500 | -1.10088200 |
| C  | 1.39611400  | -3.12730100 | 0.39599900  |
| H  | 1.31313900  | -5.25858500 | 0.42798400  |
| C  | 3.25160700  | -3.42973600 | -1.64997500 |
| H  | 2.93883300  | -5.54668500 | -1.45060700 |
| C  | 1.92928000  | -1.94450300 | -0.18755200 |
| H  | 0.72458600  | -3.00405800 | 1.23245000  |
| C  | 2.90784400  | -2.12855500 | -1.21663900 |
| H  | 4.00006600  | -3.52843600 | -2.43294400 |
| O  | 1.51992500  | -0.79189900 | 0.25833600  |
| C  | 3.64813400  | -1.02934100 | -1.75524100 |
| Co | 1.94169100  | 0.90025300  | -0.50782700 |
| N  | 3.42954200  | 0.21398400  | -1.49837400 |

|   |             |             |             |
|---|-------------|-------------|-------------|
| H | 4.48152000  | -1.29026300 | -2.40852400 |
| N | 2.34317500  | 2.55953700  | -1.38152700 |
| C | 4.27623000  | 1.30055500  | -1.99219200 |
| C | 1.92440700  | 3.71633400  | -0.98973200 |
| C | 3.29912100  | 2.38563500  | -2.47962400 |
| C | 5.30366400  | 0.94176700  | -3.06394900 |
| H | 2.28671200  | 4.60485500  | -1.50735000 |
| C | 1.02600100  | 3.94576600  | 0.09531600  |
| C | 4.04189800  | 3.63843500  | -2.94449400 |
| C | 6.04973800  | 2.20201800  | -3.52439000 |
| H | 4.79342300  | 0.48026200  | -3.92033200 |
| H | 6.01776400  | 0.20756500  | -2.67569700 |
| C | 0.78099700  | 5.28496500  | 0.48228500  |
| C | 0.38729400  | 2.86810800  | 0.78643100  |
| C | 5.07664500  | 3.27747400  | -4.01979100 |
| H | 3.33755900  | 4.37598500  | -3.34362600 |
| H | 4.54459300  | 4.09833400  | -2.08372700 |
| H | 6.76371500  | 1.94178500  | -4.31260400 |
| H | 6.63629500  | 2.60042500  | -2.68626700 |
| C | -0.04215500 | 5.58979100  | 1.54562400  |
| H | 1.27137300  | 6.07980100  | -0.07514700 |
| C | -0.41254700 | 3.21337400  | 1.90479400  |
| O | 0.46171200  | 1.61544600  | 0.42439300  |
| H | 4.55628000  | 2.91209800  | -4.91534800 |
| H | 5.62380600  | 4.17688200  | -4.32029400 |
| C | -0.62624200 | 4.52927500  | 2.26607300  |
| H | -0.21571900 | 6.61951700  | 1.83765700  |
| H | -0.81576600 | 2.40369600  | 2.48908900  |
| H | -1.24022600 | 4.74589800  | 3.13657100  |
| H | 4.78935900  | 1.70483400  | -1.10875200 |
| H | 2.74166900  | 1.95925300  | -3.32627000 |
| H | -3.23716400 | -1.63018900 | 2.76948400  |
| H | -1.46956000 | 0.51254400  | 1.55896200  |
| S | 3.16295400  | 1.00515700  | 2.34205900  |
| O | 4.22779800  | 1.78645300  | 2.98342100  |
| O | 1.83089400  | 1.00737200  | 2.96198800  |
| O | 3.15002600  | 1.44522700  | 0.84275600  |
| C | 3.70259700  | -0.70033000 | 2.27894200  |
| C | 4.79815500  | -1.05331100 | 1.49233300  |
| C | 3.03659900  | -1.65778700 | 3.03796600  |
| C | 5.20266600  | -2.38425800 | 1.44262700  |
| H | 5.31243100  | -0.29231000 | 0.91612100  |
| C | 3.45813600  | -2.98431900 | 2.98599900  |
| H | 2.18565400  | -1.35541000 | 3.63672300  |
| C | 4.53444300  | -3.37121200 | 2.17862100  |
| H | 6.04474000  | -2.66695100 | 0.81612000  |
| H | 2.93163700  | -3.73694300 | 3.56710800  |
| C | 4.92811900  | -4.82122000 | 2.05943100  |
| H | 4.68284300  | -5.37999600 | 2.96727800  |
| H | 4.39381800  | -5.29130100 | 1.22517100  |
| H | 5.99964000  | -4.93296700 | 1.86855200  |

**PO-Co<sup>III</sup>-OTs + H<sub>2</sub>O-Co<sup>III</sup>-OH bimetallic PO ring-opening in the terminal carbon**

PO-Co<sup>III</sup>-OTs + H<sub>2</sub>O-Co<sup>III</sup>-OH = OTs-Co<sup>III</sup>-PO-OH-Co<sup>III</sup>-H<sub>2</sub>O

Charge: 0

Spin Multiplicity: 1

Sum of electronic and thermal Free Energies (a.u.): -3598.305871

Thermal correction to Gibbs Free Energy (a.u.): 0.911266

No imaginary frequency

Calculation of single point energy based on the optimized structure, Ep = -6075.8796332 a.u.

|   |             |            |             |
|---|-------------|------------|-------------|
| C | -6.71144900 | 2.96469600 | -1.42441500 |
| C | -5.87461500 | 3.86024100 | -0.73526700 |
| C | -6.55177300 | 1.59302300 | -1.30504200 |
| H | -7.49383600 | 3.35187800 | -2.07130900 |
| C | -4.88817700 | 3.35139700 | 0.08831000  |
| H | -6.00377900 | 4.93111400 | -0.84637500 |
| C | -5.53712300 | 1.04766200 | -0.48806000 |
| H | -7.19075500 | 0.90086100 | -1.84301600 |
| C | -4.70226400 | 1.95795000 | 0.22989600  |
| H | -4.22617600 | 4.01795500 | 0.63568100  |

|    |             |             |             |
|----|-------------|-------------|-------------|
| O  | -5.42899400 | -0.26431300 | -0.40403100 |
| C  | -3.69378800 | 1.50384500  | 1.14249500  |
| Co | -3.80630300 | -1.11940600 | 0.09110200  |
| N  | -3.32296300 | 0.27495600  | 1.29620200  |
| H  | -3.18523200 | 2.26842800  | 1.73235900  |
| N  | -2.28369000 | -2.02116600 | 0.78857500  |
| C  | -2.19792200 | -0.06359200 | 2.19234600  |
| C  | -1.60193800 | -2.91913200 | 0.16669300  |
| C  | -2.02359100 | -1.58048400 | 2.16529200  |
| C  | -2.35910000 | 0.37724400  | 3.65032400  |
| H  | -0.68687100 | -3.29243600 | 0.62045500  |
| C  | -1.97508100 | -3.48145000 | -1.10397000 |
| C  | -0.69083900 | -1.93815000 | 2.81845200  |
| C  | -1.07876500 | 0.01077300  | 4.42153100  |
| H  | -3.23580500 | -0.12724000 | 4.07884200  |
| H  | -2.54707700 | 1.45244500  | 3.71673900  |
| C  | -1.02919100 | -4.26948000 | -1.79327100 |
| C  | -3.28279200 | -3.29301300 | -1.64506400 |
| C  | -0.73569000 | -1.48036000 | 4.28808400  |
| H  | -0.51620100 | -3.01960600 | 2.78067000  |
| H  | 0.12134400  | -1.42941800 | 2.28796800  |
| H  | -1.19864300 | 0.27268600  | 5.47819200  |
| H  | -0.23544100 | 0.59134700  | 4.03436500  |
| C  | -1.34462400 | -4.86561900 | -3.00122400 |
| H  | -0.03590200 | -4.37611300 | -1.36711400 |
| C  | -3.58396600 | -3.92607900 | -2.87071000 |
| O  | -4.22619800 | -2.56868300 | -1.05955200 |
| H  | -1.47801100 | -2.08505900 | 4.82808900  |
| H  | 0.23415700  | -1.67589800 | 4.75597200  |
| C  | -2.63340700 | -4.69203800 | -3.53080800 |
| H  | -0.60535500 | -5.45487300 | -3.53228200 |
| H  | -4.57984400 | -3.78635100 | -3.27789400 |
| H  | -2.89334500 | -5.15679400 | -4.47774400 |
| O  | -2.95503000 | -0.25280400 | -1.39713300 |
| H  | -3.12857900 | -0.78721100 | -2.18522400 |
| O  | -5.00362500 | -2.04014400 | 1.37217400  |
| H  | -5.13096700 | -2.83695900 | 0.82015800  |
| H  | -5.77158100 | -1.46981000 | 1.15831100  |
| C  | -0.48873200 | -0.36068300 | -1.90581500 |
| C  | -1.69839000 | 0.49683500  | -1.52994400 |
| O  | 0.60428000  | 0.48520000  | -2.00913600 |
| H  | -0.35236500 | -1.11672400 | -1.12188600 |
| H  | -1.52682200 | 0.97051700  | -0.57071800 |
| H  | -1.87632500 | 1.26240400  | -2.29183700 |
| C  | -0.67395600 | -1.06875400 | -3.25271100 |
| H  | 0.20150500  | -1.69078900 | -3.45346500 |
| H  | -1.55254700 | -1.72460700 | -3.28202800 |
| H  | -0.75773200 | -0.32294400 | -4.05091500 |
| C  | 2.31038400  | -4.26726800 | 0.02436300  |
| C  | 3.10526300  | -4.31388800 | -1.13566300 |
| C  | 1.81286400  | -3.06961300 | 0.50352500  |
| H  | 2.09641300  | -5.18441300 | 0.56793600  |
| C  | 3.43097200  | -3.11798200 | -1.74849600 |
| H  | 3.48616300  | -5.25671700 | -1.51282800 |
| C  | 2.05452800  | -1.82838700 | -0.15601200 |
| H  | 1.26400900  | -3.03799300 | 1.43331800  |
| C  | 2.94241600  | -1.87976200 | -1.28069400 |
| H  | 4.09802900  | -3.11262500 | -2.60796300 |
| O  | 1.49703500  | -0.75114100 | 0.30451700  |
| C  | 3.48753900  | -0.68796700 | -1.86247400 |
| Co | 1.61653900  | 0.98569600  | -0.50573900 |
| N  | 3.15122100  | 0.51160400  | -1.54921900 |
| H  | 4.28746700  | -0.83971600 | -2.58833700 |
| N  | 1.76036000  | 2.69117700  | -1.38058400 |
| C  | 3.79763600  | 1.69727400  | -2.10906400 |
| C  | 1.15635500  | 3.77222400  | -1.03447600 |
| C  | 2.64134200  | 2.61496400  | -2.54712400 |
| C  | 4.79912600  | 1.46664500  | -3.23920200 |
| H  | 1.31786700  | 4.67684700  | -1.62215900 |

|   |             |             |             |
|---|-------------|-------------|-------------|
| C | 0.30207000  | 3.91228100  | 0.10679200  |
| C | 3.15615900  | 3.94504900  | -3.09894900 |
| C | 5.31992700  | 2.80896100  | -3.76993100 |
| H | 4.30954900  | 0.91634700  | -4.05411700 |
| H | 5.63507100  | 0.85223000  | -2.88697700 |
| C | -0.14193500 | 5.20872200  | 0.44645500  |
| C | -0.06146200 | 2.79024600  | 0.91651900  |
| C | 4.16630100  | 3.70665000  | -4.22972700 |
| H | 2.32464100  | 4.55211600  | -3.47246200 |
| H | 3.63395500  | 4.51033700  | -2.28781500 |
| H | 6.02077700  | 2.63559600  | -4.59348300 |
| H | 5.88378700  | 3.31803100  | -2.97716200 |
| C | -0.88098500 | 5.44940400  | 1.58940000  |
| H | 0.12912600  | 6.03261700  | -0.21034900 |
| C | -0.72977600 | 3.08542200  | 2.13612000  |
| O | 0.14487200  | 1.54724000  | 0.58567100  |
| H | 3.65497700  | 3.23291100  | -5.07862100 |
| H | 4.55011300  | 4.66690800  | -4.59027900 |
| C | -1.13965300 | 4.36850900  | 2.45237500  |
| H | -1.20771400 | 6.45251800  | 1.84074600  |
| H | -0.85509800 | 2.27660100  | 2.83725600  |
| H | -1.64600200 | 4.54463700  | 3.39846700  |
| H | 4.29952500  | 2.19107500  | -1.26522200 |
| H | 2.07882200  | 2.07734000  | -3.32211100 |
| H | -2.84014700 | -2.02322700 | 2.75305800  |
| H | -1.29263700 | 0.38371300  | 1.75914300  |
| S | 2.98367500  | 1.25512600  | 2.32811700  |
| O | 3.91995900  | 2.17202100  | 2.99560700  |
| O | 1.69852600  | 0.99845200  | 3.00692700  |
| O | 2.83512700  | 1.70670300  | 0.86111300  |
| C | 3.79941200  | -0.33794500 | 2.19974800  |
| C | 4.83657900  | -0.51823000 | 1.28563400  |
| C | 3.40931200  | -1.38061700 | 3.03498400  |
| C | 5.45529400  | -1.76080900 | 1.18528500  |
| H | 5.13151600  | 0.30521500  | 0.64556400  |
| C | 4.04358300  | -2.61726300 | 2.93244000  |
| H | 2.59952400  | -1.21559200 | 3.73636800  |
| C | 5.06243000  | -2.83232300 | 1.99754800  |
| H | 6.24805200  | -1.90916400 | 0.45620400  |
| H | 3.72969400  | -3.43662900 | 3.57449100  |
| C | 5.68171700  | -4.19589900 | 1.82466900  |
| H | 5.58034700  | -4.80090600 | 2.73046100  |
| H | 5.18970400  | -4.73556000 | 1.00648500  |
| H | 6.74600000  | -4.12673700 | 1.57864400  |

**subsequent hydration**

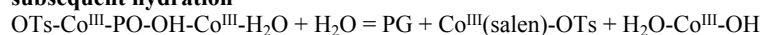

Charge: 0

Spin Multiplicity: 1

Sum of electronic and thermal Free Energies (a.u.): -3674.690516

Thermal correction to Gibbs Free Energy (a.u.): 0.932603

Imaginary frequencies: -450.96

Calculation of single point energy based on the optimized structure, Et = -6152.3185253 a.u.

|    |            |             |             |
|----|------------|-------------|-------------|
| C  | 7.18956300 | -2.78008200 | -2.13110800 |
| C  | 6.46108400 | -3.80331700 | -1.49548600 |
| C  | 6.95536200 | -1.44754100 | -1.84217000 |
| H  | 7.94681800 | -3.03819200 | -2.86630100 |
| C  | 5.50511300 | -3.45497700 | -0.56268600 |
| H  | 6.64970900 | -4.84428800 | -1.73323500 |
| C  | 5.96969000 | -1.06087400 | -0.90067900 |
| H  | 7.51171600 | -0.65622900 | -2.33346200 |
| C  | 5.23794600 | -2.10227800 | -0.24634800 |
| H  | 4.93265300 | -4.22578100 | -0.05212600 |
| O  | 5.79791600 | 0.21952500  | -0.66844300 |
| C  | 4.25048000 | -1.83177700 | 0.75764800  |
| Co | 4.28043800 | 0.96087900  | 0.20571200  |
| N  | 3.84398700 | -0.66118500 | 1.12154000  |
| H  | 3.80477700 | -2.70594800 | 1.23765900  |
| N  | 2.84946800 | 1.71534000  | 1.18859200  |
| C  | 2.73866500 | -0.50735900 | 2.08711500  |

|    |             |             |             |
|----|-------------|-------------|-------------|
| C  | 2.11570300  | 2.68881300  | 0.76911300  |
| C  | 2.64361100  | 0.98157100  | 2.43691100  |
| C  | 2.86837800  | -1.30938700 | 3.38648800  |
| H  | 1.22238700  | 2.95861500  | 1.32774000  |
| C  | 2.40893400  | 3.46404600  | -0.40393500 |
| C  | 1.36449900  | 1.24312400  | 3.22558000  |
| C  | 1.61915500  | -1.07281300 | 4.25140700  |
| H  | 3.77390000  | -0.98195600 | 3.91372500  |
| H  | 2.99092100  | -2.37858600 | 3.18928400  |
| C  | 1.41497900  | 4.32910700  | -0.90764900 |
| C  | 3.69689600  | 3.40691600  | -1.02236100 |
| C  | 1.39349000  | 0.42040200  | 4.52450000  |
| H  | 1.27679500  | 2.30839500  | 3.46739000  |
| H  | 0.50303100  | 0.95517100  | 2.61286400  |
| H  | 1.71334800  | -1.61930900 | 5.19547300  |
| H  | 0.74257000  | -1.48026300 | 3.73419900  |
| C  | 1.65848000  | 5.12411600  | -2.01368900 |
| H  | 0.44480100  | 4.34710000  | -0.42080900 |
| C  | 3.92364800  | 4.24483500  | -2.13621000 |
| O  | 4.67953600  | 2.64191400  | -0.58666700 |
| H  | 2.19548400  | 0.79901600  | 5.17289500  |
| H  | 0.45379900  | 0.56139300  | 5.06762700  |
| C  | 2.92512700  | 5.07775200  | -2.61961200 |
| H  | 0.88297400  | 5.77352800  | -2.40498700 |
| H  | 4.90164300  | 4.20497500  | -2.60429200 |
| H  | 3.12861300  | 5.69988000  | -3.48707000 |
| O  | 3.18757700  | 0.56082600  | -1.23011500 |
| H  | 3.80406500  | 0.59173600  | -1.97553000 |
| O  | 5.65312300  | 1.58829200  | 1.57857700  |
| H  | 5.68949900  | 2.48092100  | 1.18050300  |
| H  | 6.39445600  | 1.11247700  | 1.15943500  |
| C  | 0.65521600  | 0.31562900  | -1.70902000 |
| C  | 1.75780500  | -0.77465700 | -1.75545600 |
| O  | -0.62845600 | -0.26324700 | -1.83123700 |
| H  | 0.75535100  | 0.79899200  | -0.73632300 |
| H  | 1.98398700  | -1.33304400 | -0.86390300 |
| H  | 2.36539500  | -0.93536900 | -2.63098700 |
| C  | 0.81808800  | 1.33735200  | -2.83220400 |
| H  | 0.04499100  | 2.10193300  | -2.72738900 |
| H  | 1.79425000  | 1.82178100  | -2.79016400 |
| H  | 0.68988200  | 0.84895500  | -3.80469900 |
| C  | -1.59417600 | 4.36495200  | 1.38220600  |
| C  | -2.38095500 | 4.77743500  | 0.29112400  |
| C  | -1.21102500 | 3.04380100  | 1.53007400  |
| H  | -1.28547500 | 5.09195900  | 2.12907300  |
| C  | -2.82807900 | 3.80970000  | -0.58961900 |
| H  | -2.66523400 | 5.81687300  | 0.17065900  |
| C  | -1.56809700 | 2.04089300  | 0.58005400  |
| H  | -0.64750000 | 2.73262200  | 2.39879000  |
| C  | -2.47099700 | 2.45135100  | -0.45373800 |
| H  | -3.50570900 | 4.08092200  | -1.39589000 |
| O  | -1.09143800 | 0.84076800  | 0.71367700  |
| C  | -3.19651000 | 1.50003400  | -1.24096900 |
| Co | -1.65385300 | -0.70619000 | -0.28617200 |
| N  | -3.09548100 | 0.22019500  | -1.15770100 |
| H  | -3.94855400 | 1.92026300  | -1.90728700 |
| N  | -2.28936900 | -2.22456700 | -1.25180300 |
| C  | -3.99189600 | -0.67667100 | -1.89582300 |
| C  | -2.13220000 | -3.44086200 | -0.86513800 |
| C  | -3.12552100 | -1.84056200 | -2.39134500 |
| C  | -4.81301000 | -0.06652500 | -3.02834500 |
| H  | -2.68876300 | -4.22897200 | -1.37013100 |
| C  | -1.22069400 | -3.86332600 | 0.15861600  |
| C  | -3.99058500 | -2.93522300 | -3.01087000 |
| C  | -5.67247400 | -1.15787700 | -3.68509300 |
| H  | -4.14563800 | 0.39080600  | -3.77170400 |
| H  | -5.46559200 | 0.72257300  | -2.63979800 |
| C  | -1.21708100 | -5.23086000 | 0.51038800  |
| C  | -0.26088100 | -2.96663800 | 0.73370400  |

|   |             |             |             |
|---|-------------|-------------|-------------|
| C | -4.82449700 | -2.34480700 | -4.15763900 |
| H | -3.36513300 | -3.75126700 | -3.38959900 |
| H | -4.65054200 | -3.34790200 | -2.23800900 |
| H | -6.23321100 | -0.73305100 | -4.52452800 |
| H | -6.41316700 | -1.51240600 | -2.95655200 |
| C | -0.30014600 | -5.75191400 | 1.40236500  |
| H | -1.96561500 | -5.87675400 | 0.05811000  |
| C | 0.68913800  | -3.54410900 | 1.61557900  |
| O | -0.17205900 | -1.69238100 | 0.45081100  |
| H | -4.15079000 | -2.01419800 | -4.95972600 |
| H | -5.46634500 | -3.12146100 | -4.58661200 |
| C | 0.66516300  | -4.88733100 | 1.94552200  |
| H | -0.31983300 | -6.80209700 | 1.67103500  |
| H | 1.42635200  | -2.88691000 | 2.04847600  |
| H | 1.40358500  | -5.27434500 | 2.64328900  |
| O | 0.61331300  | -2.22275700 | -2.42976300 |
| H | 0.53734300  | -2.81539500 | -1.66726400 |
| H | -0.15805700 | -1.52010500 | -2.27420900 |
| H | -2.43647300 | -1.44445800 | -3.14976100 |
| H | -4.67058500 | -1.10396600 | -1.15174600 |
| H | 1.80896700  | -0.78205400 | 1.56792200  |
| H | 3.51270600  | 1.22823500  | 3.06290700  |
| S | -4.08904300 | -1.53867100 | 1.61375700  |
| O | -2.60198300 | -1.27246700 | 1.31995300  |
| O | -4.74358700 | -2.35896900 | 0.56640200  |
| O | -4.21818300 | -1.99826400 | 3.00062200  |
| C | -4.81639300 | 0.09716400  | 1.49755900  |
| C | -4.19861000 | 1.15577300  | 2.16666400  |
| C | -5.95646700 | 0.31568300  | 0.72983300  |
| C | -4.70684100 | 2.44143200  | 2.03008200  |
| H | -3.30390000 | 0.96976500  | 2.74901600  |
| C | -6.44947000 | 1.61458800  | 0.58968500  |
| H | -6.43440300 | -0.52424600 | 0.23848400  |
| C | -5.82766100 | 2.69454700  | 1.22631600  |
| H | -4.20117900 | 3.26960600  | 2.51715400  |
| H | -7.32945200 | 1.79109000  | -0.02385200 |
| C | -6.32788200 | 4.10597200  | 1.04891600  |
| H | -5.52459300 | 4.75616300  | 0.68527200  |
| H | -7.15608200 | 4.15261100  | 0.33653100  |
| H | -6.67875200 | 4.52658100  | 1.99826200  |

**subsequent hydration**

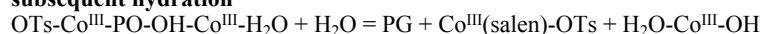

Charge: 0

Spin Multiplicity: 1

Sum of electronic and thermal Free Energies (a.u.): -3674.730424

Thermal correction to Gibbs Free Energy (a.u.): 0.933474

No imaginary frequency

Calculation of single point energy based on the optimized structure, Er = -6152.3699301 a.u.

|    |            |             |             |
|----|------------|-------------|-------------|
| C  | 6.86841100 | -2.82836700 | -2.19667200 |
| C  | 6.14739100 | -3.81478600 | -1.49984700 |
| C  | 6.68313600 | -1.48165400 | -1.93166200 |
| H  | 7.57903700 | -3.12413300 | -2.96317700 |
| C  | 5.25045200 | -3.42003200 | -0.52755500 |
| H  | 6.29388500 | -4.86545700 | -1.72314900 |
| C  | 5.75698900 | -1.05084700 | -0.95453500 |
| H  | 7.23221000 | -0.71836300 | -2.47274300 |
| C  | 5.03785700 | -2.05280100 | -0.23254100 |
| H  | 4.68227800 | -4.16104000 | 0.02876200  |
| O  | 5.61678200 | 0.24721900  | -0.75867700 |
| C  | 4.11996800 | -1.73045200 | 0.82054700  |
| Co | 4.16227400 | 1.03813700  | 0.16281000  |
| N  | 3.76986500 | -0.53817900 | 1.17671600  |
| H  | 3.67284300 | -2.57592600 | 1.34676900  |
| N  | 2.76178800 | 1.82966100  | 1.16214500  |
| C  | 2.72971000 | -0.33382800 | 2.20602300  |
| C  | 1.99892500 | 2.77154400  | 0.72026500  |
| C  | 2.62762000 | 1.17111900  | 2.46358300  |
| C  | 2.96010700 | -1.04702900 | 3.54173100  |
| H  | 1.12195400 | 3.05711000  | 1.29773500  |

|    |             |             |             |
|----|-------------|-------------|-------------|
| C  | 2.23719700  | 3.48559600  | -0.50364700 |
| C  | 1.38052900  | 1.45847300  | 3.29299100  |
| C  | 1.75118300  | -0.78151300 | 4.45515900  |
| H  | 3.88402800  | -0.66578000 | 3.99590100  |
| H  | 3.09706400  | -2.12317300 | 3.40133200  |
| C  | 1.21082800  | 4.30608100  | -1.01842200 |
| C  | 3.49917000  | 3.40914300  | -1.16774300 |
| C  | 1.49540800  | 0.72127400  | 4.63868700  |
| H  | 1.27687500  | 2.53457100  | 3.47109600  |
| H  | 0.50073600  | 1.11233300  | 2.73935700  |
| H  | 1.90974900  | -1.25802600 | 5.42787300  |
| H  | 0.86195200  | -1.24681600 | 4.01362000  |
| C  | 1.40482800  | 5.03933000  | -2.17552800 |
| H  | 0.25739700  | 4.33719900  | -0.50053500 |
| C  | 3.67709000  | 4.18333100  | -2.33261400 |
| O  | 4.50939000  | 2.67184000  | -0.72999100 |
| H  | 2.31536600  | 1.16307100  | 5.22134000  |
| H  | 0.57874200  | 0.87418400  | 5.21647100  |
| C  | 2.64920300  | 4.97659600  | -2.82354700 |
| H  | 0.60534000  | 5.65318500  | -2.57522200 |
| H  | 4.63768100  | 4.12895800  | -2.83377500 |
| H  | 2.81199700  | 5.55103700  | -3.73120400 |
| O  | 3.01597200  | 0.57390300  | -1.28609200 |
| H  | 3.58639000  | 0.42905100  | -2.05316600 |
| O  | 5.54930300  | 1.70963200  | 1.41111500  |
| H  | 5.59146800  | 2.59276900  | 0.98896900  |
| H  | 6.29382600  | 1.21582300  | 1.01643400  |
| C  | 0.58490700  | 0.53588600  | -1.70162900 |
| C  | 1.82147400  | -0.28407200 | -1.32269500 |
| O  | -0.49940500 | -0.34409000 | -1.74437900 |
| H  | 0.44459300  | 1.30407100  | -0.93381900 |
| H  | 1.68309400  | -0.71061900 | -0.33571200 |
| H  | 1.99796300  | -1.08785300 | -2.04001900 |
| C  | 0.73704400  | 1.22229300  | -3.05934500 |
| H  | -0.16606100 | 1.79871900  | -3.27600700 |
| H  | 1.59023000  | 1.90847600  | -3.07007200 |
| H  | 0.86412100  | 0.47365900  | -3.84948700 |
| C  | -1.70876200 | 4.37907000  | 1.37416700  |
| C  | -2.47098600 | 4.74148000  | 0.24935800  |
| C  | -1.28732500 | 3.07390500  | 1.56228500  |
| H  | -1.45054200 | 5.13117200  | 2.11554500  |
| C  | -2.85727700 | 3.73918900  | -0.62391000 |
| H  | -2.78717800 | 5.76750600  | 0.09698100  |
| C  | -1.58003600 | 2.03831700  | 0.62346000  |
| H  | -0.74511400 | 2.79985900  | 2.45726100  |
| C  | -2.46147600 | 2.39784800  | -0.44855500 |
| H  | -3.51711900 | 3.97131400  | -1.45679800 |
| O  | -1.06015900 | 0.86211000  | 0.78906200  |
| C  | -3.12330100 | 1.40679200  | -1.24836800 |
| Co | -1.53753700 | -0.73218900 | -0.20544200 |
| N  | -2.97688900 | 0.13455500  | -1.14302800 |
| H  | -3.86508300 | 1.79049300  | -1.94775100 |
| N  | -2.09806900 | -2.28648800 | -1.14234200 |
| C  | -3.81001300 | -0.80684000 | -1.90115600 |
| C  | -1.84994200 | -3.49189800 | -0.77979100 |
| C  | -2.88522800 | -1.95128900 | -2.32896000 |
| C  | -4.59650900 | -0.24668300 | -3.08266400 |
| H  | -2.32065100 | -4.30914800 | -1.32390300 |
| C  | -0.94487100 | -3.86874000 | 0.26891200  |
| C  | -3.67953400 | -3.08619400 | -2.96922300 |
| C  | -5.38840100 | -1.37951000 | -3.75393300 |
| H  | -3.90876000 | 0.21553200  | -3.80416500 |
| H  | -5.29168000 | 0.52911200  | -2.74373600 |
| C  | -0.84998700 | -5.24004600 | 0.58918200  |
| C  | -0.09064900 | -2.91556900 | 0.91415300  |
| C  | -4.47945500 | -2.54454200 | -4.16315200 |
| H  | -3.00292600 | -3.87728300 | -3.30902600 |
| H  | -4.35787000 | -3.51620900 | -2.22177600 |
| H  | -5.92531000 | -0.99053000 | -4.62597400 |

|   |             |             |             |
|---|-------------|-------------|-------------|
| H | -6.14847100 | -1.74519100 | -3.05113900 |
| C | 0.04707400  | -5.71343200 | 1.52802300  |
| H | -1.51285300 | -5.93095400 | 0.07381700  |
| C | 0.82226400  | -3.43832700 | 1.86968600  |
| O | -0.07256000 | -1.63728500 | 0.65485600  |
| H | -3.77986100 | -2.20428400 | -4.93846000 |
| H | -5.07397700 | -3.34992500 | -4.60752600 |
| C | 0.88716400  | -4.78764600 | 2.16854600  |
| H | 0.09713800  | -6.76971400 | 1.76762000  |
| H | 1.44963800  | -2.73395700 | 2.39339500  |
| H | 1.59312200  | -5.13061800 | 2.92127900  |
| O | 0.47840600  | -2.68883800 | -2.78040500 |
| H | 0.55503900  | -3.21156700 | -1.97219900 |
| H | 0.05250900  | -1.85927200 | -2.45671800 |
| H | -2.16491000 | -1.55411100 | -3.05494400 |
| H | -4.50777700 | -1.23758000 | -1.17641000 |
| H | 1.77235100  | -0.66027700 | 1.77453300  |
| H | 3.51889800  | 1.47411100  | 3.03076700  |
| S | -4.03034900 | -1.58273800 | 1.63302300  |
| O | -2.54416500 | -1.28180000 | 1.39071800  |
| O | -4.62728700 | -2.43991700 | 0.58124800  |
| O | -4.20807100 | -2.01261100 | 3.02513700  |
| C | -4.79829300 | 0.03072500  | 1.45540900  |
| C | -4.24562800 | 1.11758700  | 2.13620900  |
| C | -5.90602900 | 0.20475700  | 0.63120400  |
| C | -4.78568300 | 2.38506900  | 1.95756600  |
| H | -3.37475400 | 0.96669900  | 2.76330900  |
| C | -6.43115000 | 1.48575500  | 0.44856600  |
| H | -6.33365100 | -0.65632100 | 0.13020300  |
| C | -5.87429200 | 2.59271400  | 1.09845700  |
| H | -4.32981500 | 3.23512900  | 2.45625400  |
| H | -7.28538300 | 1.62674700  | -0.20911400 |
| C | -6.40957200 | 3.98521500  | 0.87784200  |
| H | -5.61131500 | 4.65633500  | 0.54197600  |
| H | -7.20469200 | 3.99589600  | 0.12722900  |
| H | -6.81775600 | 4.40712600  | 1.80350900  |

**subsequent hydration**

OTs-Co<sup>III</sup>-PO-OH-Co<sup>III</sup>-H<sub>2</sub>O + H<sub>2</sub>O = PG + Co<sup>III</sup>(salen)-OTs + H<sub>2</sub>O-Co<sup>III</sup>-OH

Charge: 0

Spin Multiplicity: 1

Sum of electronic and thermal Free Energies (a.u.): -3674.737324

Thermal correction to Gibbs Free Energy (a.u.): 0.932011

No imaginary frequency

Calculation of single point energy based on the optimized structure, Ep = -6152.366488 a.u.

|    |            |             |             |
|----|------------|-------------|-------------|
| C  | 7.81195600 | -2.86620600 | -1.82508500 |
| C  | 7.04275700 | -3.90878400 | -1.27338300 |
| C  | 7.51286100 | -1.54136400 | -1.56622600 |
| H  | 8.65331600 | -3.10425300 | -2.47044100 |
| C  | 5.97844200 | -3.58464900 | -0.45647700 |
| H  | 7.28312900 | -4.94461800 | -1.48632800 |
| C  | 6.41850700 | -1.17885200 | -0.73962500 |
| H  | 8.09961700 | -0.73512600 | -1.99390500 |
| C  | 5.64309300 | -2.24028600 | -0.17232900 |
| H  | 5.37081200 | -4.37091100 | -0.01420700 |
| O  | 6.19601400 | 0.09246400  | -0.52357600 |
| C  | 4.53837700 | -1.99834000 | 0.70823100  |
| Co | 4.60061900 | 0.80660100  | 0.23036900  |
| N  | 4.08048900 | -0.84166800 | 1.05223800  |
| H  | 4.05106200 | -2.88930300 | 1.11137400  |
| N  | 3.10608100 | 1.54836400  | 1.12838900  |
| C  | 2.86062900 | -0.72091300 | 1.87133400  |
| C  | 2.44174500 | 2.57289400  | 0.71744400  |
| C  | 2.76223200 | 0.74763900  | 2.30274600  |
| C  | 2.79762000 | -1.61470400 | 3.11577900  |
| H  | 1.51375100 | 2.83792900  | 1.21878700  |
| C  | 2.85485500 | 3.42547300  | -0.36192100 |
| C  | 1.42574800 | 1.01178500  | 2.98923100  |
| C  | 1.48809900 | -1.36135300 | 3.88162000  |
| H  | 3.66480800 | -1.38974200 | 3.75020500  |



|    |             |             |             |
|----|-------------|-------------|-------------|
| H  | 2.87153900  | -2.67376200 | 2.84880800  |
| C  | 1.94634700  | 4.39600100  | -0.83659700 |
| C  | 4.17645900  | 3.34982100  | -0.90527600 |
| C  | 1.31030300  | 0.11986400  | 4.23492800  |
| H  | 1.35220800  | 2.06514500  | 3.28355200  |
| H  | 0.60800400  | 0.79028100  | 2.29366700  |
| H  | 1.46905800  | -1.97323500 | 4.78958700  |
| H  | 0.63966900  | -1.68247100 | 3.26739900  |
| C  | 2.29953100  | 5.27653100  | -1.84244700 |
| H  | 0.95014100  | 4.42693300  | -0.40380300 |
| C  | 4.51547700  | 4.27645000  | -1.92054700 |
| O  | 5.08861700  | 2.50150300  | -0.48963100 |
| H  | 2.07308800  | 0.42027500  | 4.96615900  |
| H  | 0.33620100  | 0.27456300  | 4.70969500  |
| C  | 3.59872500  | 5.20898600  | -2.37721600 |
| H  | 1.58871100  | 6.00862600  | -2.21038100 |
| H  | 5.51804200  | 4.22143200  | -2.33176200 |
| H  | 3.89071300  | 5.89719700  | -3.16612900 |
| O  | 3.59003600  | 0.40242200  | -1.23585800 |
| H  | 4.19921600  | 0.60875700  | -1.95976300 |
| O  | 5.90372200  | 1.39495500  | 1.75269700  |
| H  | 5.96988100  | 2.28694200  | 1.36092000  |
| H  | 6.64358100  | 0.91025300  | 1.34126900  |
| C  | 0.47883300  | 0.11924400  | -1.92712400 |
| C  | 1.31604500  | -0.95738200 | -2.63287800 |
| O  | -0.91908600 | -0.32974600 | -2.06522500 |
| H  | 0.70678100  | 0.12433700  | -0.86162900 |
| H  | 2.33719500  | -0.90967700 | -2.24688700 |
| H  | 1.31518200  | -0.80108600 | -3.71655900 |
| C  | 0.63794800  | 1.50402300  | -2.50851200 |
| H  | 0.00926200  | 2.22373700  | -1.97943600 |
| H  | 1.68142200  | 1.80441700  | -2.38806300 |
| H  | 0.37161900  | 1.51700200  | -3.57066000 |
| C  | -1.38302500 | 4.34798000  | 1.16881400  |
| C  | -2.29250000 | 4.80215900  | 0.19426000  |
| C  | -1.05594100 | 3.00926500  | 1.27577800  |
| H  | -0.93367500 | 5.05843300  | 1.85783600  |
| C  | -2.90048800 | 3.86429300  | -0.61593800 |
| H  | -2.53321000 | 5.85575600  | 0.10695300  |
| C  | -1.59870500 | 2.02853300  | 0.39669200  |
| H  | -0.39153100 | 2.66556200  | 2.05530000  |
| C  | -2.59787600 | 2.48722200  | -0.52101500 |
| H  | -3.65765500 | 4.17266800  | -1.33282200 |
| O  | -1.17998100 | 0.80113600  | 0.48598600  |
| C  | -3.43472500 | 1.58026600  | -1.24057500 |
| Co | -1.94281800 | -0.70739500 | -0.40298500 |
| N  | -3.37970800 | 0.29314400  | -1.18628900 |
| H  | -4.22454200 | 2.03894600  | -1.83347000 |
| N  | -2.73143800 | -2.19769200 | -1.29818000 |
| C  | -4.38335900 | -0.55401400 | -1.84507400 |
| C  | -2.66719200 | -3.40407100 | -0.84448400 |
| C  | -3.63519700 | -1.78349500 | -2.37588700 |
| C  | -5.23562600 | 0.09126500  | -2.93509500 |
| H  | -3.33380400 | -4.15592100 | -1.26364100 |
| C  | -1.73725500 | -3.85740600 | 0.14415300  |
| C  | -4.61632700 | -2.82962400 | -2.89873500 |
| C  | -6.21138000 | -0.95006800 | -3.50634700 |
| H  | -4.59013300 | 0.48785700  | -3.73073800 |
| H  | -5.80655900 | 0.93084400  | -2.52499500 |
| C  | -1.84540300 | -5.18770500 | 0.60407600  |
| C  | -0.63689700 | -3.04308000 | 0.55476800  |
| C  | -5.48591600 | -2.20709800 | -4.00152100 |
| H  | -4.07757400 | -3.69808300 | -3.29339600 |
| H  | -5.24724400 | -3.17341600 | -2.07010800 |
| H  | -6.79446500 | -0.50348700 | -4.31852600 |
| H  | -6.92591300 | -1.23279500 | -2.72245600 |
| C  | -0.89453500 | -5.74162900 | 1.43921200  |
| H  | -2.70099300 | -5.77596500 | 0.28235100  |
| C  | 0.35487100  | -3.65898700 | 1.35249000  |

|   |             |             |             |
|---|-------------|-------------|-------------|
| O | -0.45697100 | -1.79935400 | 0.16374800  |
| H | -4.84995300 | -1.94743800 | -4.85853100 |
| H | -6.21080500 | -2.94458100 | -4.36110800 |
| C | 0.22210500  | -4.96495200 | 1.79238000  |
| H | -0.99608200 | -6.75978200 | 1.79765200  |
| H | 1.22138000  | -3.06961200 | 1.61499000  |
| H | 0.99719600  | -5.39276600 | 2.42275000  |
| O | 0.70427600  | -2.24193100 | -2.42509500 |
| H | 0.66322100  | -2.36950400 | -1.46055600 |
| H | -0.78470200 | -1.26294800 | -2.36623200 |
| H | -2.99614500 | -1.45084700 | -3.20694200 |
| H | -5.03698200 | -0.92146100 | -1.04849800 |
| H | 2.00176300  | -0.93167200 | 1.21776600  |
| H | 3.57551400  | 0.92571700  | 3.02083800  |
| S | -4.22744500 | -1.32307900 | 1.69001300  |
| O | -2.74796000 | -1.17036100 | 1.25642800  |
| O | -5.03177600 | -2.08974700 | 0.71180900  |
| O | -4.23529100 | -1.78138900 | 3.08116500  |
| C | -4.83241600 | 0.36205100  | 1.64692400  |
| C | -4.09396600 | 1.35591200  | 2.29342500  |
| C | -6.00453300 | 0.67839700  | 0.96681300  |
| C | -4.52105400 | 2.67601800  | 2.22592700  |
| H | -3.17816300 | 1.09276000  | 2.80962100  |
| C | -6.41407500 | 2.01126100  | 0.89492300  |
| H | -6.57626200 | -0.11239100 | 0.49463500  |
| C | -5.67690100 | 3.02718400  | 1.51361400  |
| H | -3.92803600 | 3.45325000  | 2.69794200  |
| H | -7.32132800 | 2.26469300  | 0.35251600  |
| C | -6.09295600 | 4.47261900  | 1.41163100  |
| H | -5.28636000 | 5.07494000  | 0.97960200  |
| H | -6.98253400 | 4.59222600  | 0.78746900  |
| H | -6.31660000 | 4.89238700  | 2.39878700  |

PO-Co<sup>III</sup>-OTs + H<sub>2</sub>O-Co<sup>III</sup>-OH bimetallic PO ring-opening in the middle carbon and subsequent hydration

**PO-Co<sup>III</sup>-OTs + H<sub>2</sub>O-Co<sup>III</sup>-OH bimetallic PO ring-opening in the middle carbon**

PO-Co<sup>III</sup>-OTs + H<sub>2</sub>O-Co<sup>III</sup>-OH = OTs-Co<sup>III</sup>-PO-OH-Co<sup>III</sup>-H<sub>2</sub>O

Charge: 0

Spin Multiplicity: 1

Sum of electronic and thermal Free Energies (a.u.): -3598.276245

Thermal correction to Gibbs Free Energy (a.u.): 0.903285

Imaginary frequencies: -389.20

Calculation of single point energy based on the optimized structure, Et = -6075.8437945 a.u.

|    |            |             |             |
|----|------------|-------------|-------------|
| C  | 7.94890300 | -2.61963500 | 2.60132200  |
| C  | 8.13157300 | -1.37305000 | 3.23225600  |
| C  | 7.03828000 | -2.77561600 | 1.57376800  |
| H  | 8.53117000 | -3.47660600 | 2.92913100  |
| C  | 7.37964100 | -0.29884700 | 2.80363700  |
| H  | 8.84742600 | -1.26265000 | 4.03930900  |
| C  | 6.25067400 | -1.68801500 | 1.11263200  |
| H  | 6.89248000 | -3.73424200 | 1.08708200  |
| C  | 6.43709900 | -0.42242400 | 1.75487200  |
| H  | 7.50006700 | 0.67406500  | 3.27493200  |
| O  | 5.42619800 | -1.89719500 | 0.12026300  |
| C  | 5.69553800 | 0.74541400  | 1.38252100  |
| Co | 4.12811000 | -0.66746800 | -0.54609800 |
| N  | 4.79445400 | 0.81687800  | 0.46081600  |
| H  | 5.92311300 | 1.64663900  | 1.95471300  |
| N  | 2.94877300 | 0.57515900  | -1.34426700 |
| C  | 3.97917300 | 2.02634100  | 0.26350800  |
| C  | 1.83890300 | 0.27500500  | -1.93641700 |
| C  | 3.43302700 | 1.94908800  | -1.16862000 |
| C  | 4.66823600 | 3.37082000  | 0.50910900  |
| H  | 1.18253500 | 1.07801200  | -2.25012000 |
| C  | 1.41192300 | -1.05614600 | -2.26132200 |
| C  | 2.44485500 | 3.07801200  | -1.44979000 |
| C  | 3.69024300 | 4.52196500  | 0.22254100  |
| H  | 5.54789300 | 3.44627500  | -0.14347900 |
| H  | 5.02381300 | 3.44637900  | 1.54161100  |
| C  | 0.12681600 | -1.22789400 | -2.82879100 |

|    |             |             |             |
|----|-------------|-------------|-------------|
| C  | 2.30223500  | -2.16848000 | -2.14649700 |
| C  | 3.10852900  | 4.43702800  | -1.19334600 |
| H  | 2.08227800  | 3.02994200  | -2.47898100 |
| H  | 1.56439000  | 2.97033500  | -0.80743900 |
| H  | 4.19670400  | 5.48130400  | 0.37234200  |
| H  | 2.87007700  | 4.48233200  | 0.95228400  |
| C  | -0.26662900 | -2.45540200 | -3.32838800 |
| H  | -0.57463400 | -0.40176800 | -2.82707600 |
| C  | 1.86289300  | -3.41568900 | -2.64862600 |
| O  | 3.51986200  | -2.08563700 | -1.65000800 |
| H  | 3.91209600  | 4.59409400  | -1.92539700 |
| H  | 2.37355000  | 5.23209200  | -1.35419500 |
| C  | 0.61600300  | -3.54593400 | -3.24194600 |
| H  | -1.25185800 | -2.56752600 | -3.76607600 |
| H  | 2.54395000  | -4.25664200 | -2.56940200 |
| H  | 0.31354900  | -4.51572600 | -3.62902100 |
| O  | 2.95818500  | -1.04748000 | 0.82531200  |
| H  | 3.08123700  | -2.00318200 | 0.91932600  |
| O  | 5.48466900  | -0.44873200 | -2.09390600 |
| H  | 4.98460900  | -1.10472400 | -2.62037900 |
| H  | 6.16770500  | -0.99021300 | -1.65836100 |
| C  | 0.81666200  | -0.71901800 | 1.27019300  |
| C  | 0.76073000  | 0.71900400  | 1.49710500  |
| O  | -0.60098600 | 0.37457500  | 1.71635100  |
| H  | 0.54126000  | -1.04153300 | 0.27738600  |
| H  | 0.92089200  | 1.34814500  | 0.62369500  |
| H  | 1.24956800  | 1.10316700  | 2.39822300  |
| C  | 0.87561100  | -1.71960700 | 2.37993200  |
| H  | 1.24913900  | -2.67420300 | 2.00489100  |
| H  | 1.51463900  | -1.37104500 | 3.19471600  |
| H  | -0.13340400 | -1.89909100 | 2.75819800  |
| C  | -1.46671100 | -4.54225300 | 0.59071900  |
| C  | -2.33998200 | -4.64599100 | 1.69260700  |
| C  | -1.24790000 | -3.33448100 | -0.04166600 |
| H  | -0.95394300 | -5.42895800 | 0.22671800  |
| C  | -2.96823000 | -3.50304500 | 2.14464500  |
| H  | -2.50766000 | -5.60119600 | 2.17853400  |
| C  | -1.89725800 | -2.14505300 | 0.39124900  |
| H  | -0.58911700 | -3.25899400 | -0.89662800 |
| C  | -2.75023900 | -2.24658400 | 1.53498100  |
| H  | -3.64464200 | -3.55148900 | 2.99523100  |
| O  | -1.68607000 | -1.05000500 | -0.27742200 |
| C  | -3.42374500 | -1.10682500 | 2.07824300  |
| Co | -1.97917800 | 0.68957200  | 0.39448200  |
| N  | -3.21966700 | 0.11567200  | 1.72609900  |
| H  | -4.15409000 | -1.31202500 | 2.86142500  |
| N  | -2.21776900 | 2.44143800  | 1.14577100  |
| C  | -3.94190600 | 1.25487200  | 2.28969300  |
| C  | -1.96763100 | 3.54711700  | 0.53122100  |
| C  | -2.88432900 | 2.36891200  | 2.44783400  |
| C  | -4.69681400 | 1.00418400  | 3.59439300  |
| H  | -2.21614800 | 4.48963000  | 1.02152500  |
| C  | -1.43163700 | 3.64823600  | -0.79446500 |
| C  | -3.50643800 | 3.66301000  | 2.97047100  |
| C  | -5.31605700 | 2.30867600  | 4.11459800  |
| H  | -4.00314600 | 0.59720300  | 4.34257400  |
| H  | -5.48279500 | 0.25748300  | 3.43951800  |
| C  | -1.40244200 | 4.91908400  | -1.40958600 |
| C  | -0.98881300 | 2.49294900  | -1.51366700 |
| C  | -4.25647500 | 3.40288000  | 4.28443200  |
| H  | -2.73295300 | 4.42288700  | 3.12763500  |
| H  | -4.20351000 | 4.05773800  | 2.21959900  |
| H  | -5.82745800 | 2.12242000  | 5.06483300  |
| H  | -6.08172900 | 2.65238900  | 3.40666400  |
| C  | -1.00816900 | 5.07438000  | -2.72514800 |
| H  | -1.72379400 | 5.78194900  | -0.83015900 |
| C  | -0.67213700 | 2.67033500  | -2.88599900 |
| O  | -0.80629900 | 1.32563600  | -0.95743900 |
| H  | -3.53879900 | 3.09724700  | 5.05771700  |

|   |             |             |             |
|---|-------------|-------------|-------------|
| H | -4.71976800 | 4.33102600  | 4.63512300  |
| C | -0.67110800 | 3.92631000  | -3.46645900 |
| H | -1.00157300 | 6.05401100  | -3.19033200 |
| H | -0.45928500 | 1.78645000  | -3.47451700 |
| H | -0.42069100 | 4.02273900  | -4.51947600 |
| H | -4.64381500 | 1.58815400  | 1.51292200  |
| H | -2.13784100 | 2.00177700  | 3.16559700  |
| H | 4.29488800  | 2.05442100  | -1.84375900 |
| H | 3.12343600  | 1.93622600  | 0.94544400  |
| S | -3.95571100 | 0.37241200  | -1.99278000 |
| O | -5.10504300 | 1.12247200  | -2.51730700 |
| O | -2.85745100 | 0.05174100  | -2.91769500 |
| O | -3.48109100 | 1.12225100  | -0.71429500 |
| C | -4.58982600 | -1.17652900 | -1.34978700 |
| C | -5.61744400 | -1.15055400 | -0.40745800 |
| C | -4.05448300 | -2.38748200 | -1.77815700 |
| C | -6.08841200 | -2.34881100 | 0.12518900  |
| H | -6.04015600 | -0.19987000 | -0.10004000 |
| C | -4.53696200 | -3.57825700 | -1.24216500 |
| H | -3.24208400 | -2.37719800 | -2.49352400 |
| C | -5.54977100 | -3.57845400 | -0.27572400 |
| H | -6.88535400 | -2.33205400 | 0.86466500  |
| H | -4.09910200 | -4.52131500 | -1.55650500 |
| C | -6.01790000 | -4.87357500 | 0.33859300  |
| H | -6.91259300 | -4.72796000 | 0.95041900  |
| H | -6.25017200 | -5.61985100 | -0.42845700 |
| H | -5.23504100 | -5.29673100 | 0.97823400  |

**PO-Co<sup>III</sup>-OTs + H<sub>2</sub>O-Co<sup>III</sup>-OH bimetallic PO ring-opening in the middle carbon**

PO-Co<sup>III</sup>-OTs + H<sub>2</sub>O-Co<sup>III</sup>-OH = OTs-Co<sup>III</sup>-PO-OH-Co<sup>III</sup>-H<sub>2</sub>O

Charge: 0

Spin Multiplicity: 1

Sum of electronic and thermal Free Energies (a.u.): -3598.293514

Thermal correction to Gibbs Free Energy (a.u.): 0.902815

No imaginary frequency

Calculation of single point energy based on the optimized structure, Er = -6075.8615794 a.u.

|    |            |             |             |
|----|------------|-------------|-------------|
| C  | 7.94692600 | -2.16478500 | 2.60738000  |
| C  | 7.90629700 | -1.00206800 | 3.40295400  |
| C  | 7.15529300 | -2.29044100 | 1.48244600  |
| H  | 8.60954900 | -2.98053100 | 2.88423600  |
| C  | 7.05525100 | 0.01955600  | 3.03581500  |
| H  | 8.53019000 | -0.91497500 | 4.28575500  |
| C  | 6.26824500 | -1.25567700 | 1.08010000  |
| H  | 7.18048000 | -3.18538600 | 0.86957700  |
| C  | 6.22945200 | -0.07436800 | 1.89000900  |
| H  | 7.00374100 | 0.92732200  | 3.63322400  |
| O  | 5.56609600 | -1.42947500 | -0.00566800 |
| C  | 5.37226400 | 1.03468200  | 1.59369900  |
| Co | 4.17783900 | -0.28563300 | -0.64391200 |
| N  | 4.55522500 | 1.12199700  | 0.59803000  |
| H  | 5.42342700 | 1.86688900  | 2.29871700  |
| N  | 2.91402500 | 0.91038000  | -1.39672200 |
| C  | 3.59165200 | 2.22705600  | 0.47869800  |
| C  | 1.84815200 | 0.54072700  | -2.02604600 |
| C  | 3.19534500 | 2.29039800  | -1.00393300 |
| C  | 4.04224200 | 3.59900200  | 0.98356700  |
| H  | 1.06772600 | 1.27071100  | -2.22475200 |
| C  | 1.61167800 | -0.78553600 | -2.51342800 |
| C  | 2.09432500 | 3.31547600  | -1.25792300 |
| C  | 2.93345100 | 4.63597100  | 0.74245800  |
| H  | 4.95878900 | 3.89342300  | 0.45579200  |
| H  | 4.28121800 | 3.56489200  | 2.05136300  |
| C  | 0.36013200 | -1.05600500 | -3.10691000 |
| C  | 2.62716900 | -1.79227100 | -2.47567900 |
| C  | 2.51692000 | 4.69330300  | -0.73232500 |
| H  | 1.87526000 | 3.37731000  | -2.32796500 |
| H  | 1.16970000 | 2.98845500  | -0.77278300 |
| H  | 3.26848100 | 5.62155800  | 1.08269300  |
| H  | 2.06029400 | 4.37436700  | 1.35589800  |
| C  | 0.09568300 | -2.28956900 | -3.67487100 |

|    |             |             |             |
|----|-------------|-------------|-------------|
| H  | -0.41840000 | -0.30203600 | -3.07839800 |
| C  | 2.32268200  | -3.04713700 | -3.05377600 |
| O  | 3.82332800  | -1.60763700 | -1.96035900 |
| H  | 3.36031300  | 5.06590800  | -1.32889000 |
| H  | 1.69556700  | 5.40419700  | -0.86983700 |
| C  | 1.08924900  | -3.28282200 | -3.64290600 |
| H  | -0.86744700 | -2.47506600 | -4.13638000 |
| H  | 3.09078500  | -3.81289600 | -3.02127300 |
| H  | 0.88949300  | -4.25791500 | -4.08006100 |
| O  | 2.91700700  | -0.92044700 | 0.51519200  |
| H  | 3.03478100  | -1.87971000 | 0.47151100  |
| O  | 5.63984000  | 0.27251100  | -2.03706300 |
| H  | 5.23796300  | -0.33777200 | -2.68607400 |
| H  | 6.31359500  | -0.28126800 | -1.60189300 |
| C  | 0.57442300  | 0.51676400  | 1.75977100  |
| C  | 0.16080500  | 1.91894400  | 1.91241900  |
| O  | -0.85161900 | 0.87859300  | 1.90480500  |
| H  | 0.81858900  | 0.16937500  | 0.76232200  |
| H  | 0.11862200  | 2.55918300  | 1.03918400  |
| H  | 0.25141600  | 2.40866100  | 2.87969700  |
| C  | 1.11942200  | -0.30449500 | 2.88703100  |
| H  | 2.19694500  | -0.40795700 | 2.73899300  |
| H  | 0.89539700  | 0.14060200  | 3.86134700  |
| H  | 0.68838400  | -1.30879000 | 2.84231600  |
| C  | 0.24116800  | -4.00844800 | 0.61982300  |
| C  | -0.59581600 | -4.44880500 | 1.66782700  |
| C  | 0.05214600  | -2.78383000 | 0.01346100  |
| H  | 1.05288300  | -4.64391800 | 0.27551600  |
| C  | -1.61693600 | -3.62295400 | 2.08728200  |
| H  | -0.43581500 | -5.41503300 | 2.13411600  |
| C  | -0.99872000 | -1.91701900 | 0.42014000  |
| H  | 0.69426700  | -2.44901300 | -0.78735400 |
| C  | -1.83221900 | -2.35417900 | 1.49747200  |
| H  | -2.28264200 | -3.93735800 | 2.88789600  |
| O  | -1.14994500 | -0.79254800 | -0.22216600 |
| C  | -2.93428900 | -1.57380300 | 1.96253000  |
| Co | -2.15181600 | 0.67184500  | 0.39286500  |
| N  | -3.19500800 | -0.36201100 | 1.60201100  |
| H  | -3.59671000 | -2.05867500 | 2.67929800  |
| N  | -3.09879900 | 2.18299600  | 1.10664400  |
| C  | -4.36677000 | 0.38823300  | 2.04829800  |
| C  | -3.22459200 | 3.31027400  | 0.49001700  |
| C  | -3.86145300 | 1.82345800  | 2.30641900  |
| C  | -5.11814900 | -0.17135700 | 3.25440300  |
| H  | -3.89282300 | 4.06412300  | 0.90846800  |
| C  | -2.57938400 | 3.65862400  | -0.74022100 |
| C  | -5.00835200 | 2.75527600  | 2.69558000  |
| C  | -6.26581600 | 0.76930500  | 3.64789400  |
| H  | -4.42347900 | -0.28597200 | 4.09761600  |
| H  | -5.51538400 | -1.16502100 | 3.02187500  |
| C  | -2.95609700 | 4.86900200  | -1.36629800 |
| C  | -1.59868800 | 2.81209500  | -1.35004100 |
| C  | -5.76068000 | 2.19266000  | 3.91030800  |
| H  | -4.62850800 | 3.75698100  | 2.92483400  |
| H  | -5.69659200 | 2.85318500  | 1.84593800  |
| H  | -6.77852000 | 0.37830600  | 4.53285800  |
| H  | -7.00692300 | 0.79143300  | 2.83818400  |
| C  | -2.42337700 | 5.24910200  | -2.58165100 |
| H  | -3.69661800 | 5.49595800  | -0.87472500 |
| C  | -1.10095100 | 3.20895700  | -2.61694200 |
| O  | -1.10837300 | 1.74114200  | -0.78157300 |
| H  | -5.09027600 | 2.18598500  | 4.78036700  |
| H  | -6.59675600 | 2.85259500  | 4.16380500  |
| C  | -1.49735400 | 4.39403200  | -3.20873900 |
| H  | -2.72909500 | 6.17486200  | -3.05637600 |
| H  | -0.41763000 | 2.53718000  | -3.12227200 |
| H  | -1.09659300 | 4.65980700  | -4.18312000 |
| H  | -5.04326800 | 0.43896100  | 1.18452200  |
| H  | -3.14362300 | 1.76544100  | 3.13746800  |

|   |             |             |             |
|---|-------------|-------------|-------------|
| H | 4.09595800  | 2.58775900  | -1.56083500 |
| H | 2.69935800  | 1.91522000  | 1.03585300  |
| S | -3.78778500 | -0.32999300 | -2.07935700 |
| O | -5.11507000 | 0.00631900  | -2.61049800 |
| O | -2.64096700 | -0.31221700 | -2.99571500 |
| O | -3.58279000 | 0.59542600  | -0.83784000 |
| C | -3.90919200 | -1.97530200 | -1.38000900 |
| C | -4.98277400 | -2.27771200 | -0.54271700 |
| C | -2.94054400 | -2.93371900 | -1.66474000 |
| C | -5.06256200 | -3.54306000 | 0.03598500  |
| H | -5.74698600 | -1.53029400 | -0.35716900 |
| C | -3.04011800 | -4.19831700 | -1.09181200 |
| H | -2.10377700 | -2.67066800 | -2.29749300 |
| C | -4.09062200 | -4.51876100 | -0.22426300 |
| H | -5.89417600 | -3.78126700 | 0.69463100  |
| H | -2.26697400 | -4.93406000 | -1.29229700 |
| C | -4.14972100 | -5.87603100 | 0.42972300  |
| H | -5.04164500 | -5.98426100 | 1.05302300  |
| H | -4.16058200 | -6.67847300 | -0.31594400 |
| H | -3.26933600 | -6.03362000 | 1.06263400  |

**PO-Co<sup>III</sup>-OTs + H<sub>2</sub>O-Co<sup>III</sup>-OH bimetallic PO ring-opening in the middle carbon**

PO-Co<sup>III</sup>-OTs + H<sub>2</sub>O-Co<sup>III</sup>-OH = OTs-Co<sup>III</sup>-PO-OH-Co<sup>III</sup>-H<sub>2</sub>O

Charge: 0

Spin Multiplicity: 1

Sum of electronic and thermal Free Energies (a.u.): -3598.303453

Thermal correction to Gibbs Free Energy (a.u.): 0.910132

No imaginary frequency

Calculation of single point energy based on the optimized structure, Ep = -6075.8816318 a.u.

|    |             |             |             |
|----|-------------|-------------|-------------|
| C  | 8.18029800  | -2.50142500 | 2.17142800  |
| C  | 8.60426700  | -1.19808100 | 2.49455200  |
| C  | 6.98838300  | -2.72323900 | 1.50591300  |
| H  | 8.79850400  | -3.35064800 | 2.44851900  |
| C  | 7.80184000  | -0.13260800 | 2.14121900  |
| H  | 9.54030500  | -1.03682600 | 3.01738100  |
| C  | 6.15012100  | -1.64635900 | 1.12288200  |
| H  | 6.65590600  | -3.72558500 | 1.25788000  |
| C  | 6.57895600  | -0.32270200 | 1.45457000  |
| H  | 8.10061900  | 0.88277000  | 2.39037300  |
| O  | 5.03352300  | -1.92455200 | 0.48892600  |
| C  | 5.77761800  | 0.83508000  | 1.17148800  |
| Co | 3.92225800  | -0.66374500 | -0.40379500 |
| N  | 4.68291900  | 0.84588000  | 0.48995600  |
| H  | 6.13708100  | 1.77662600  | 1.58813300  |
| N  | 2.81810400  | 0.58189700  | -1.29408500 |
| C  | 3.84756900  | 2.04237000  | 0.31442300  |
| C  | 1.73884400  | 0.28281200  | -1.94646500 |
| C  | 3.30081100  | 1.96274300  | -1.11830400 |
| C  | 4.50448100  | 3.39417700  | 0.58819000  |
| H  | 1.11540600  | 1.09079800  | -2.30666300 |
| C  | 1.30136600  | -1.04278600 | -2.27204400 |
| C  | 2.29119600  | 3.07722600  | -1.37978700 |
| C  | 3.49549400  | 4.52327900  | 0.32027600  |
| H  | 5.38399800  | 3.51215300  | -0.05945300 |
| H  | 4.85105400  | 3.45118900  | 1.62571300  |
| C  | 0.04782300  | -1.19376300 | -2.90871300 |
| C  | 2.13478100  | -2.17800100 | -2.05984800 |
| C  | 2.92392000  | 4.44575400  | -1.09964600 |
| H  | 1.92944500  | 3.04338500  | -2.40931300 |
| H  | 1.41746600  | 2.93014600  | -0.73829300 |
| H  | 3.97675600  | 5.49200500  | 0.48998700  |
| H  | 2.67480200  | 4.44641100  | 1.04533200  |
| C  | -0.34085300 | -2.42142500 | -3.41276400 |
| H  | -0.63852300 | -0.35631000 | -2.95215800 |
| C  | 1.71317700  | -3.42026700 | -2.57378900 |
| O  | 3.30656600  | -2.11993100 | -1.43599900 |
| H  | 3.72612800  | 4.63634900  | -1.82568000 |
| H  | 2.16848900  | 5.22282700  | -1.25118500 |
| C  | 0.50830300  | -3.52809900 | -3.25767500 |
| H  | -1.30264900 | -2.51772400 | -3.90255700 |

|    |             |             |             |
|----|-------------|-------------|-------------|
| H  | 2.35926900  | -4.27847500 | -2.42269400 |
| H  | 0.20958600  | -4.49664200 | -3.64965700 |
| O  | 2.74554100  | -0.92039900 | 1.09578300  |
| H  | 3.10461800  | -1.76572700 | 1.41565200  |
| O  | 5.25217000  | -0.59885300 | -1.88719800 |
| H  | 4.79737900  | -1.36392200 | -2.31198200 |
| H  | 6.06462000  | -0.97049600 | -1.50680900 |
| C  | 1.25540400  | -0.95012200 | 1.20678700  |
| C  | 0.77228000  | 0.49286300  | 1.43676500  |
| O  | -0.56671500 | 0.53936500  | 1.76419800  |
| H  | 0.85664500  | -1.33847000 | 0.27221600  |
| H  | 1.00335900  | 1.08698300  | 0.54399100  |
| H  | 1.37553300  | 0.89840400  | 2.27474600  |
| C  | 0.93325300  | -1.86446200 | 2.37113500  |
| H  | 1.19132200  | -2.90613600 | 2.15349100  |
| H  | 1.46005200  | -1.53060200 | 3.27293400  |
| H  | -0.13852600 | -1.81053200 | 2.56025900  |
| C  | -1.34483600 | -4.53159400 | 0.58850900  |
| C  | -2.23411600 | -4.64007500 | 1.67637600  |
| C  | -1.10728600 | -3.31817400 | -0.02500100 |
| H  | -0.83507400 | -5.41870400 | 0.22011100  |
| C  | -2.86348600 | -3.49563300 | 2.12541700  |
| H  | -2.41738200 | -5.59837000 | 2.15072400  |
| C  | -1.74687900 | -2.12255500 | 0.41172600  |
| H  | -0.43340100 | -3.24197100 | -0.86660000 |
| C  | -2.62978400 | -2.23497500 | 1.53357500  |
| H  | -3.55836100 | -3.54852700 | 2.96089500  |
| O  | -1.49628400 | -1.02157900 | -0.22536700 |
| C  | -3.31790100 | -1.10181300 | 2.07615800  |
| Co | -1.87872500 | 0.71969900  | 0.41785000  |
| N  | -3.13050800 | 0.12257300  | 1.72805900  |
| H  | -4.05159500 | -1.32137400 | 2.85253000  |
| N  | -2.21800500 | 2.47584600  | 1.11130300  |
| C  | -3.87218600 | 1.24571400  | 2.29987600  |
| C  | -2.02405300 | 3.57937500  | 0.47980300  |
| C  | -2.84266800 | 2.38961700  | 2.42938100  |
| C  | -4.59034900 | 0.98080900  | 3.62306600  |
| H  | -2.30584700 | 4.51974700  | 0.95700100  |
| C  | -1.50786800 | 3.67911000  | -0.85713500 |
| C  | -3.48343000 | 3.66696800  | 2.96896500  |
| C  | -5.22677400 | 2.27018500  | 4.15948600  |
| H  | -3.86815400 | 0.59057600  | 4.35280300  |
| H  | -5.36309600 | 0.21627900  | 3.48971000  |
| C  | -1.55113100 | 4.93494200  | -1.49744100 |
| C  | -1.01185800 | 2.53226800  | -1.55615600 |
| C  | -4.18928800 | 3.38899300  | 4.30317000  |
| H  | -2.72501300 | 4.44649100  | 3.10282100  |
| H  | -4.21261500 | 4.04448200  | 2.23963100  |
| H  | -5.71046700 | 2.07193100  | 5.12204600  |
| H  | -6.01750100 | 2.59658800  | 3.47088300  |
| C  | -1.17991300 | 5.08751700  | -2.82154800 |
| H  | -1.91099500 | 5.79109000  | -0.93034600 |
| C  | -0.72400900 | 2.70231500  | -2.93777400 |
| O  | -0.75369000 | 1.39143000  | -0.97940900 |
| H  | -3.44302400 | 3.09796400  | 5.05475400  |
| H  | -4.66472800 | 4.30515900  | 4.66968900  |
| C  | -0.79393900 | 3.94453500  | -3.54437200 |
| H  | -1.23039700 | 6.05743000  | -3.30437000 |
| H  | -0.47904700 | 1.82025200  | -3.51725300 |
| H  | -0.56320000 | 4.03119300  | -4.60298000 |
| H  | -4.60080800 | 1.55444000  | 1.53716700  |
| H  | -2.05849200 | 2.04040300  | 3.11360000  |
| H  | 4.15715600  | 2.07979200  | -1.79899300 |
| H  | 2.99671000  | 1.91711900  | 0.99466000  |
| S  | -3.90808700 | 0.31108000  | -1.99352600 |
| O  | -5.08033100 | 1.01444200  | -2.53648200 |
| O  | -2.82203600 | -0.02067700 | -2.93562200 |
| O  | -3.42611400 | 1.07961500  | -0.74831000 |
| C  | -4.50920700 | -1.23791900 | -1.31515000 |

|   |             |             |             |
|---|-------------|-------------|-------------|
| C | -5.54071800 | -1.21032500 | -0.37683500 |
| C | -3.95122500 | -2.44957300 | -1.71127500 |
| C | -5.99589400 | -2.40417700 | 0.17854300  |
| H | -5.97957900 | -0.26009100 | -0.09144000 |
| C | -4.41872500 | -3.63710400 | -1.15465600 |
| H | -3.13584100 | -2.44192500 | -2.42296200 |
| C | -5.43820400 | -3.63367300 | -0.19593000 |
| H | -6.79595800 | -2.38446800 | 0.91476600  |
| H | -3.96260800 | -4.57927700 | -1.44495100 |
| C | -5.89437800 | -4.92403200 | 0.43729500  |
| H | -6.77293500 | -4.77198200 | 1.07074400  |
| H | -6.14958000 | -5.67390100 | -0.31935100 |
| H | -5.09680900 | -5.34676700 | 1.05869600  |

**subsequent hydration**

OTs-Co<sup>III</sup>-PO-OH-Co<sup>III</sup>-H<sub>2</sub>O + H<sub>2</sub>O = PG + Co<sup>III</sup>(salen)-OTs + H<sub>2</sub>O-Co<sup>III</sup>-OH

Charge: 0

Spin Multiplicity: 1

Sum of electronic and thermal Free Energies (a.u.): -3674.686513

Thermal correction to Gibbs Free Energy (a.u.): 0.929443

Imaginary frequencies: -396.72

Calculation of single point energy based on the optimized structure, Et = -6152.317986 a.u.

|    |            |             |             |
|----|------------|-------------|-------------|
| C  | 6.24824900 | -1.58659500 | -4.27288400 |
| C  | 5.40968200 | -2.70542900 | -4.11384100 |
| C  | 6.29306000 | -0.58530200 | -3.31910900 |
| H  | 6.87141900 | -1.50344600 | -5.15916000 |
| C  | 4.62021200 | -2.78832000 | -2.98437500 |
| C  | 5.49495200 | -0.64850300 | -2.15110100 |
| C  | 4.63425300 | -1.77755200 | -1.99503100 |
| H  | 3.96331300 | -3.63800600 | -2.83322500 |
| O  | 5.61694100 | 0.31499000  | -1.26688300 |
| C  | 3.78982100 | -1.95512400 | -0.84990600 |
| Co | 4.45335200 | 0.60561900  | 0.19273000  |
| N  | 3.69390700 | -1.14298300 | 0.15194000  |
| H  | 3.17744700 | -2.85807100 | -0.84879600 |
| N  | 3.47734300 | 0.83257300  | 1.82286100  |
| C  | 2.71400100 | -1.36955200 | 1.23013400  |
| C  | 3.14958600 | 1.96524000  | 2.34836800  |
| C  | 3.12819900 | -0.46854600 | 2.40313100  |
| C  | 2.58180200 | -2.81353100 | 1.71827400  |
| H  | 2.53043700 | 1.97164300  | 3.24549900  |
| C  | 3.50407400 | 3.24391800  | 1.80054700  |
| C  | 2.05683600 | -0.47792900 | 3.49242500  |
| C  | 1.52880200 | -2.87050500 | 2.83366500  |
| H  | 3.55693700 | -3.16498100 | 2.08108800  |
| H  | 2.27576500 | -3.46904100 | 0.90065800  |
| C  | 2.83249300 | 4.39069000  | 2.27982000  |
| C  | 4.51715400 | 3.37041000  | 0.79765500  |
| C  | 1.84888800 | -1.91711100 | 3.98989200  |
| H  | 2.34794300 | 0.16134800  | 4.33285100  |
| H  | 1.12175100 | -0.08130300 | 3.07657100  |
| H  | 1.42807200 | -3.89683000 | 3.20330900  |
| H  | 0.56453400 | -2.58747300 | 2.40274900  |
| C  | 3.12316400 | 5.64842100  | 1.78776400  |
| H  | 2.05929300 | 4.26037800  | 3.03246000  |
| C  | 4.80810400 | 4.67392000  | 0.32687300  |
| O  | 5.20115700 | 2.35608600  | 0.32168000  |
| H  | 2.75785100 | -2.25292200 | 4.50629600  |
| H  | 1.04169900 | -1.93711200 | 4.73031500  |
| C  | 4.12515300 | 5.77837000  | 0.80755600  |
| H  | 4.36587800 | 6.76260000  | 0.41534900  |
| O  | 3.10980500 | 1.19023000  | -0.93902200 |
| H  | 3.55020100 | 1.90466400  | -1.42293500 |
| O  | 6.12074100 | 0.06716200  | 1.27319400  |
| H  | 6.38322700 | 0.99394700  | 1.42854800  |
| H  | 6.61037600 | -0.17499800 | 0.46318400  |
| H  | 1.73201900 | -1.02948500 | 0.87188600  |
| H  | 4.06503200 | -0.87268500 | 2.81228300  |
| C  | 1.13385700 | 1.81203100  | -0.26531500 |
| C  | 0.42990800 | 0.56831700  | -0.76708200 |



|    |             |             |             |
|----|-------------|-------------|-------------|
| O  | -0.26697700 | -0.05821100 | 0.29535500  |
| H  | 1.69429000  | 1.75885400  | 0.63898800  |
| H  | 1.20517500  | -0.08233000 | -1.18402900 |
| H  | -0.24892600 | 0.83946100  | -1.57999500 |
| C  | 1.13802000  | 3.05930000  | -1.08705500 |
| H  | 0.11400000  | 3.43037800  | -1.19122100 |
| H  | 1.76946500  | 3.83605700  | -0.65383200 |
| H  | 1.48413100  | 2.82061300  | -2.09774200 |
| O  | -0.31749500 | 2.25281300  | 1.11720600  |
| H  | -0.49920700 | 1.24039300  | 1.00822200  |
| H  | -1.09817300 | 2.68360500  | 0.73300700  |
| H  | 5.57998400  | 4.77067200  | -0.42925000 |
| H  | 2.59060600  | 6.52071500  | 2.14995200  |
| H  | 6.93917700  | 0.27841600  | -3.43537700 |
| H  | 5.38434800  | -3.48691500 | -4.86538400 |
| C  | 1.25786900  | -3.67537500 | -3.17100800 |
| C  | 1.42259500  | -4.62980000 | -2.14283000 |
| C  | 0.39658700  | -2.60861400 | -3.02644000 |
| H  | 1.81824500  | -3.78040900 | -4.09577400 |
| C  | 0.69267300  | -4.47725100 | -0.97961400 |
| H  | 2.08508300  | -5.47866600 | -2.27559600 |
| C  | -0.37635100 | -2.42645200 | -1.84065400 |
| H  | 0.26063500  | -1.88021200 | -3.81845000 |
| C  | -0.19070100 | -3.38902600 | -0.79136100 |
| H  | 0.77901400  | -5.21262300 | -0.18204600 |
| O  | -1.20065600 | -1.43309400 | -1.79561100 |
| C  | -0.94961600 | -3.33291700 | 0.42386800  |
| Co | -1.98963700 | -0.75875100 | -0.21207800 |
| N  | -1.69711400 | -2.35108800 | 0.79041800  |
| H  | -0.88155300 | -4.20727300 | 1.07326000  |
| N  | -2.70856400 | -0.04549500 | 1.41505400  |
| C  | -2.57297000 | -2.38401600 | 1.96477700  |
| C  | -3.27957800 | 1.10154700  | 1.54721800  |
| C  | -2.53073600 | -0.96542800 | 2.55097300  |
| C  | -2.29041400 | -3.44757100 | 3.02369200  |
| H  | -3.69702400 | 1.36647900  | 2.51795200  |
| C  | -3.38004400 | 2.11444200  | 0.53391500  |
| C  | -3.52627300 | -0.81961300 | 3.70287600  |
| C  | -3.29902000 | -3.30455600 | 4.17284100  |
| H  | -1.26903600 | -3.33959400 | 3.41077900  |
| H  | -2.36997300 | -4.44845500 | 2.58666300  |
| C  | -3.93894800 | 3.36325800  | 0.89562200  |
| C  | -2.88261400 | 1.91226900  | -0.79667300 |
| C  | -3.26566100 | -1.89331900 | 4.76926000  |
| H  | -3.44343700 | 0.17042400  | 4.16424400  |
| H  | -4.53567300 | -0.91802600 | 3.28981500  |
| H  | -3.08926600 | -4.05101100 | 4.94651700  |
| H  | -4.30630300 | -3.51288700 | 3.79175400  |
| C  | -3.99350200 | 4.41833000  | 0.00807300  |
| H  | -4.32209900 | 3.47963600  | 1.90679900  |
| C  | -2.93880500 | 3.02617400  | -1.68441100 |
| O  | -2.37209200 | 0.80527600  | -1.22865100 |
| H  | -2.28251700 | -1.71854200 | 5.22985200  |
| H  | -4.00663000 | -1.80196000 | 5.57043200  |
| C  | -3.47123300 | 4.23720000  | -1.28888200 |
| H  | -4.41879900 | 5.37091400  | 0.30395400  |
| H  | -2.56228800 | 2.87249700  | -2.68952900 |
| H  | -3.49185500 | 5.06331300  | -1.99481500 |
| H  | -3.58868700 | -2.52602800 | 1.58284000  |
| H  | -1.50805100 | -0.79488200 | 2.92473300  |
| S  | -5.12220100 | -1.41656000 | -0.45746900 |
| O  | -5.89861100 | -2.51308400 | -1.05072000 |
| O  | -5.35072200 | -1.14501800 | 0.98281800  |
| O  | -3.63395400 | -1.64426700 | -0.78584600 |
| C  | -5.52970500 | 0.08604400  | -1.33385500 |
| C  | -5.11219300 | 0.23476800  | -2.65658200 |
| C  | -6.27229000 | 1.07995800  | -0.70314700 |
| C  | -5.43906900 | 1.39977700  | -3.34220700 |
| H  | -4.51377900 | -0.54034200 | -3.12082300 |

|   |             |            |             |
|---|-------------|------------|-------------|
| C | -6.59243400 | 2.24185500 | -1.40258600 |
| H | -6.57565200 | 0.93879900 | 0.32764900  |
| C | -6.17586700 | 2.42107000 | -2.72574400 |
| H | -5.10610300 | 1.52829800 | -4.36881300 |
| H | -7.15826500 | 3.02725000 | -0.90913800 |
| C | -6.46153900 | 3.71042100 | -3.45124100 |
| H | -5.68560300 | 4.45409600 | -3.22916300 |
| H | -6.48003400 | 3.56747800 | -4.53552100 |
| H | -7.42023200 | 4.14026000 | -3.14573200 |

**subsequent hydration**

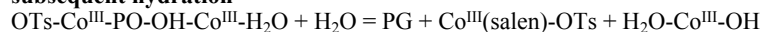

Charge: 0

Spin Multiplicity: 1

Sum of electronic and thermal Free Energies (a.u.): -3674.731230

Thermal correction to Gibbs Free Energy (a.u.): 0.934697

No imaginary frequency

Calculation of single point energy based on the optimized structure, Er = -6152.3681682 a.u.

|    |             |             |             |
|----|-------------|-------------|-------------|
| C  | 6.09959900  | -1.06711400 | -4.26887100 |
| C  | 5.34578200  | -2.24969900 | -4.16895500 |
| C  | 6.08304000  | -0.12028200 | -3.25810000 |
| H  | 6.70462300  | -0.88755400 | -5.15318600 |
| C  | 4.57862900  | -2.45711400 | -3.03963200 |
| C  | 5.30428100  | -0.31036500 | -2.09458900 |
| C  | 4.53387100  | -1.50657100 | -1.99357000 |
| H  | 3.98249600  | -3.35676400 | -2.93438000 |
| O  | 5.35877100  | 0.61724800  | -1.15680000 |
| C  | 3.72126200  | -1.81284500 | -0.85139000 |
| Co | 4.17971000  | 0.74456400  | 0.31180000  |
| N  | 3.55966500  | -1.05727600 | 0.18570700  |
| H  | 3.19081500  | -2.76596400 | -0.88583600 |
| N  | 3.16093000  | 0.82409100  | 1.91419600  |
| C  | 2.62437300  | -1.42239900 | 1.27184100  |
| C  | 2.67088400  | 1.89297900  | 2.44127100  |
| C  | 2.97906600  | -0.52449500 | 2.46357400  |
| C  | 2.66385600  | -2.88783800 | 1.70508600  |
| H  | 2.02222300  | 1.80417700  | 3.30653200  |
| C  | 2.90347400  | 3.21631500  | 1.92195300  |
| C  | 1.97353700  | -0.68378800 | 3.60100200  |
| C  | 1.67164100  | -3.09418500 | 2.85790700  |
| H  | 3.68467200  | -3.14638800 | 2.01775800  |
| H  | 2.39494100  | -3.54234900 | 0.87379500  |
| C  | 2.07935000  | 4.26858000  | 2.37045600  |
| C  | 3.94706400  | 3.47484000  | 0.98504100  |
| C  | 1.94219200  | -2.15643400 | 4.03990600  |
| H  | 2.25739000  | -0.05281900 | 4.45072900  |
| H  | 0.98506200  | -0.35249000 | 3.26620900  |
| H  | 1.69210500  | -4.13860800 | 3.18726600  |
| H  | 0.66598400  | -2.89848000 | 2.47684900  |
| C  | 2.25929200  | 5.56162000  | 1.91271000  |
| H  | 1.28028700  | 4.03245300  | 3.06685300  |
| C  | 4.12296600  | 4.80509500  | 0.54529200  |
| O  | 4.76407400  | 2.53938900  | 0.52315900  |
| H  | 2.90375000  | -2.41658100 | 4.50247700  |
| H  | 1.17617500  | -2.29216300 | 4.81081300  |
| C  | 3.29505300  | 5.82144800  | 0.99984000  |
| H  | 3.44890300  | 6.83309400  | 0.63531700  |
| O  | 2.84178400  | 1.34606600  | -0.92940600 |
| H  | 3.25824300  | 2.14734700  | -1.28497300 |
| O  | 5.81415000  | 0.30625600  | 1.35519200  |
| H  | 6.01166800  | 1.23418500  | 1.59208600  |
| H  | 6.36259700  | 0.14448700  | 0.56062700  |
| H  | 1.60859300  | -1.16156900 | 0.93475900  |
| H  | 3.97179500  | -0.83364400 | 2.82025600  |
| C  | 1.40062400  | 1.60633000  | -0.66310200 |
| C  | 0.62523800  | 0.31994200  | -0.99709400 |
| O  | -0.12820800 | -0.13140400 | 0.10793600  |
| H  | 1.30378500  | 1.83240900  | 0.39376900  |
| H  | 1.35455200  | -0.43710000 | -1.31554100 |
| H  | -0.02425600 | 0.50966400  | -1.85555300 |

|    |             |             |             |
|----|-------------|-------------|-------------|
| C  | 1.00619000  | 2.81830900  | -1.48413000 |
| H  | -0.04761400 | 3.04435900  | -1.30349800 |
| H  | 1.59566200  | 3.69953800  | -1.20313700 |
| H  | 1.12412000  | 2.62290700  | -2.55555400 |
| O  | -0.12314300 | 1.54380900  | 2.17523600  |
| H  | -0.15715700 | 0.88459100  | 1.42253600  |
| H  | -0.73434900 | 2.23137000  | 1.87990500  |
| H  | 4.92318900  | 5.00081800  | -0.16071900 |
| H  | 1.61045200  | 6.36192400  | 2.25067500  |
| H  | 6.66367900  | 0.79329500  | -3.32936600 |
| H  | 5.36521600  | -2.98464000 | -4.96603400 |
| C  | 1.38825800  | -3.83383000 | -3.27015800 |
| C  | 1.60519200  | -4.73252200 | -2.20231300 |
| C  | 0.49816900  | -2.78679700 | -3.15633500 |
| H  | 1.92818700  | -3.96978800 | -4.20363700 |
| C  | 0.88555500  | -4.55182400 | -1.03526800 |
| H  | 2.29047400  | -5.56675500 | -2.30963100 |
| C  | -0.25486100 | -2.56815800 | -1.96230600 |
| H  | 0.32334500  | -2.10095900 | -3.97827400 |
| C  | -0.02626700 | -3.48362900 | -0.87842300 |
| H  | 1.00078600  | -5.25376400 | -0.21140100 |
| O  | -1.09548600 | -1.59090800 | -1.93785800 |
| C  | -0.79128400 | -3.41168900 | 0.33475300  |
| Co | -1.84640400 | -0.84799300 | -0.35457300 |
| N  | -1.55877500 | -2.43569000 | 0.67026600  |
| H  | -0.71753300 | -4.27282300 | 1.00153400  |
| N  | -2.55573600 | -0.12546800 | 1.26654400  |
| C  | -2.44998100 | -2.46027200 | 1.83330600  |
| C  | -2.97880200 | 1.07985100  | 1.42209700  |
| C  | -2.41262600 | -1.04016200 | 2.40984700  |
| C  | -2.19720300 | -3.51944300 | 2.90321000  |
| H  | -3.34232800 | 1.37839900  | 2.40526300  |
| C  | -2.96875800 | 2.11060000  | 0.42549000  |
| C  | -3.43437800 | -0.87891100 | 3.53747500  |
| C  | -3.23759700 | -3.36427400 | 4.02255800  |
| H  | -1.18844100 | -3.41243900 | 3.32251100  |
| H  | -2.26660300 | -4.52313300 | 2.47028300  |
| C  | -3.36295400 | 3.41217000  | 0.81459600  |
| C  | -2.57187200 | 1.85713400  | -0.92946500 |
| C  | -3.20848100 | -1.95046700 | 4.61385700  |
| H  | -3.34908900 | 0.11126100  | 3.99721300  |
| H  | -4.43376000 | -0.96883400 | 3.10089300  |
| H  | -3.05649800 | -4.10962100 | 4.80478400  |
| H  | -4.23488000 | -3.56479100 | 3.61238300  |
| C  | -3.35450100 | 4.47059000  | -0.07141400 |
| H  | -3.67877300 | 3.56541200  | 1.84456900  |
| C  | -2.58822000 | 2.96839600  | -1.82328600 |
| O  | -2.21030100 | 0.70435200  | -1.38826400 |
| H  | -2.23542300 | -1.78178900 | 5.09782600  |
| H  | -3.96833300 | -1.85117200 | 5.39640800  |
| C  | -2.95335900 | 4.23129400  | -1.40151300 |
| H  | -3.65122200 | 5.46417000  | 0.24640700  |
| H  | -2.30338600 | 2.77448300  | -2.85140700 |
| H  | -2.93681400 | 5.05336300  | -2.11259600 |
| H  | -3.45871500 | -2.60046500 | 1.43367000  |
| H  | -1.40171500 | -0.86025200 | 2.80842500  |
| S  | -4.99771000 | -1.46476800 | -0.56029600 |
| O  | -5.81729600 | -2.46222300 | -1.26169700 |
| O  | -5.21649600 | -1.33658100 | 0.90172100  |
| O  | -3.52102500 | -1.71071800 | -0.91479600 |
| C  | -5.36796300 | 0.13429900  | -1.26745100 |
| C  | -5.05532400 | 0.37363800  | -2.60600800 |
| C  | -5.98458200 | 1.11260700  | -0.49360600 |
| C  | -5.35825100 | 1.61174400  | -3.16094300 |
| H  | -4.55747600 | -0.39412200 | -3.18665800 |
| C  | -6.28341500 | 2.34932400  | -1.06345900 |
| H  | -6.21424200 | 0.89586400  | 0.54311900  |
| C  | -5.96994700 | 2.61831800  | -2.39900700 |
| H  | -5.10675700 | 1.80950900  | -4.19968800 |

|   |             |            |             |
|---|-------------|------------|-------------|
| H | -6.75303300 | 3.12053800 | -0.45897500 |
| C | -6.23191500 | 3.97902600 | -2.99017600 |
| H | -5.38619500 | 4.64932700 | -2.79209600 |
| H | -6.36646000 | 3.92822600 | -4.07465000 |
| H | -7.12318600 | 4.44158000 | -2.55548800 |

**subsequent hydration**

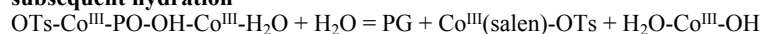

Charge: 0

Spin Multiplicity: 1

Sum of electronic and thermal Free Energies (a.u.): -3674.737225

Thermal correction to Gibbs Free Energy (a.u.): 0.930804

No imaginary frequency

Calculation of single point energy based on the optimized structure, Ep = -6152.3697757 a.u.

|    |             |             |             |
|----|-------------|-------------|-------------|
| C  | 6.50354600  | -2.26660100 | -4.05002200 |
| C  | 5.76845400  | -3.40719700 | -3.67101300 |
| C  | 6.44891200  | -1.10191100 | -3.30831300 |
| H  | 7.12426200  | -2.29983700 | -4.94138100 |
| C  | 4.97913600  | -3.34009500 | -2.54107200 |
| C  | 5.65031700  | -1.00827000 | -2.13787200 |
| C  | 4.89512600  | -2.16237200 | -1.76110900 |
| H  | 4.39609100  | -4.20117400 | -2.22854900 |
| O  | 5.66639500  | 0.11630000  | -1.46855100 |
| C  | 4.02030100  | -2.17417700 | -0.62468600 |
| Co | 4.64970100  | 0.52288900  | 0.07719400  |
| N  | 3.85894600  | -1.20673400 | 0.21518400  |
| H  | 3.43340900  | -3.08248100 | -0.49386300 |
| N  | 3.74495100  | 0.91417800  | 1.70733900  |
| C  | 2.82795500  | -1.25813300 | 1.26272700  |
| C  | 3.47794500  | 2.10313200  | 2.13154500  |
| C  | 3.29024500  | -0.30657100 | 2.37800300  |
| C  | 2.50668100  | -2.63736500 | 1.84050600  |
| H  | 2.86345300  | 2.21517400  | 3.02598800  |
| C  | 3.92440300  | 3.31889400  | 1.51664700  |
| C  | 2.20532900  | -0.14782600 | 3.44365900  |
| C  | 1.42852700  | -2.50113900 | 2.92526700  |
| H  | 3.42175900  | -3.07757800 | 2.25872100  |
| H  | 2.14464000  | -3.30581000 | 1.05697500  |
| C  | 3.37989100  | 4.54013600  | 1.97236300  |
| C  | 4.92258000  | 3.31572300  | 0.49167300  |
| C  | 1.84260700  | -1.52117400 | 4.02753800  |
| H  | 2.54347800  | 0.51637200  | 4.24603300  |
| H  | 1.31738400  | 0.30684000  | 2.98577600  |
| H  | 1.20475300  | -3.48479400 | 3.35302400  |
| H  | 0.50799100  | -2.13882600 | 2.45559900  |
| C  | 3.77202300  | 5.74842000  | 1.42967400  |
| H  | 2.62575100  | 4.51092000  | 2.75565900  |
| C  | 5.31467900  | 4.57044000  | -0.03746700 |
| O  | 5.51234400  | 2.23069900  | 0.05930600  |
| H  | 2.70756900  | -1.92192800 | 4.57243500  |
| H  | 1.03514700  | -1.40904900 | 4.75954400  |
| C  | 4.75088400  | 5.74916100  | 0.41728500  |
| H  | 5.06907300  | 6.69248400  | -0.01834600 |
| O  | 3.21541500  | 1.11894300  | -0.88249900 |
| H  | 3.59297300  | 1.24162400  | -1.76549100 |
| O  | 6.39862000  | 0.01625000  | 1.11168600  |
| H  | 6.63866400  | 0.96437300  | 1.12549500  |
| H  | 6.86331400  | -0.31913800 | 0.32566200  |
| H  | 1.91388400  | -0.83777000 | 0.82547100  |
| H  | 4.18339400  | -0.75526900 | 2.83673900  |
| C  | 0.47360000  | 2.49810300  | 0.43303000  |
| C  | 0.22668000  | 1.15769900  | -0.25451900 |
| O  | -0.54732300 | 0.33853200  | 0.68388600  |
| H  | 1.19950400  | 2.35781600  | 1.23602300  |
| H  | 1.16638900  | 0.65788400  | -0.48262300 |
| H  | -0.36469100 | 1.27621000  | -1.16202400 |
| C  | 0.98741800  | 3.54578200  | -0.53579700 |
| H  | 0.26315400  | 3.71434000  | -1.34187700 |
| H  | 1.17337500  | 4.48999100  | -0.01871700 |
| H  | 1.92705700  | 3.18745200  | -0.96479200 |

|    |             |             |             |
|----|-------------|-------------|-------------|
| O  | -0.73213100 | 2.89257400  | 1.12483600  |
| H  | -0.97910700 | 1.02448000  | 1.24037000  |
| H  | -1.37451300 | 3.19948100  | 0.46488300  |
| H  | 6.06936300  | 4.56813500  | -0.81671000 |
| H  | 3.33789100  | 6.67921300  | 1.77794700  |
| H  | 7.01273400  | -0.22054600 | -3.59548000 |
| H  | 5.82065300  | -4.31769300 | -4.25792700 |
| C  | 1.53075900  | -3.22642900 | -2.92453000 |
| C  | 1.52803000  | -4.31942600 | -2.02791400 |
| C  | 0.69804700  | -2.14475300 | -2.73495700 |
| H  | 2.20380200  | -3.23688600 | -3.77657100 |
| C  | 0.69361900  | -4.27361000 | -0.93172300 |
| H  | 2.16042400  | -5.18204100 | -2.20792000 |
| C  | -0.20363900 | -2.08421400 | -1.63148800 |
| H  | 0.68699500  | -1.31064300 | -3.42766900 |
| C  | -0.15833500 | -3.16661400 | -0.69245500 |
| H  | 0.67071900  | -5.10118400 | -0.22580900 |
| O  | -1.00451200 | -1.07028000 | -1.55293700 |
| C  | -0.98742600 | -3.19433300 | 0.46987000  |
| Co | -2.12238000 | -0.64058200 | -0.09464200 |
| N  | -1.75766900 | -2.24111400 | 0.87699100  |
| H  | -0.95094000 | -4.11258200 | 1.05732700  |
| N  | -3.08717500 | -0.08905200 | 1.46708900  |
| C  | -2.72614500 | -2.41774000 | 1.96830200  |
| C  | -3.78395100 | 0.99349900  | 1.57969600  |
| C  | -2.92241300 | -1.03134300 | 2.58968800  |
| C  | -2.39095700 | -3.46077800 | 3.03424400  |
| H  | -4.31946800 | 1.16703900  | 2.51216600  |
| C  | -3.88950500 | 2.03280800  | 0.60283100  |
| C  | -4.04534900 | -1.05397600 | 3.62761900  |
| C  | -3.50988700 | -3.49498800 | 4.08608000  |
| H  | -1.43117500 | -3.21694500 | 3.50836500  |
| H  | -2.28950500 | -4.45298900 | 2.58359300  |
| C  | -4.61805400 | 3.19526600  | 0.94447300  |
| C  | -3.22153700 | 1.95336600  | -0.66210400 |
| C  | -3.74672400 | -2.11147700 | 4.70069400  |
| H  | -4.14994500 | -0.07684800 | 4.11068200  |
| H  | -4.98312500 | -1.27604100 | 3.10735900  |
| H  | -3.26207700 | -4.22131100 | 4.86739700  |
| H  | -4.43479400 | -3.84271000 | 3.60944500  |
| C  | -4.68038000 | 4.28450500  | 0.09971600  |
| H  | -5.12499400 | 3.21994400  | 1.90613800  |
| C  | -3.28130400 | 3.10156400  | -1.50126400 |
| O  | -2.55003100 | 0.92478700  | -1.07672100 |
| H  | -2.85493100 | -1.80978800 | 5.26793300  |
| H  | -4.57407000 | -2.15101500 | 5.41681000  |
| C  | -3.98577900 | 4.22984000  | -1.12501800 |
| H  | -5.23623300 | 5.17246200  | 0.37921700  |
| H  | -2.76756300 | 3.04397100  | -2.45425400 |
| H  | -4.00478200 | 5.08850700  | -1.79075600 |
| H  | -3.67805300 | -2.68195500 | 1.49545400  |
| H  | -1.97648900 | -0.75851700 | 3.08600800  |
| S  | -5.04018100 | -1.63289700 | -0.76127200 |
| O  | -5.57473900 | -2.78149100 | -1.50052700 |
| O  | -5.45764900 | -1.48470200 | 0.65124500  |
| O  | -3.49515900 | -1.66689200 | -0.92166600 |
| C  | -5.52590600 | -0.13920600 | -1.60703900 |
| C  | -4.98635000 | 0.13608200  | -2.86373300 |
| C  | -6.44662800 | 0.72223800  | -1.01756800 |
| C  | -5.37143100 | 1.29801000  | -3.52324500 |
| H  | -4.25382700 | -0.53639900 | -3.29433400 |
| C  | -6.82396600 | 1.88170200  | -1.69183800 |
| H  | -6.84321100 | 0.48439000  | -0.03755600 |
| C  | -6.28746700 | 2.18955600  | -2.94640200 |
| H  | -4.94524200 | 1.52720000  | -4.49621300 |
| H  | -7.53054800 | 2.56536300  | -1.22987900 |
| C  | -6.64193300 | 3.48160000  | -3.63525900 |
| H  | -5.98386300 | 4.28961900  | -3.29147000 |
| H  | -6.52943700 | 3.40418700  | -4.72036500 |

H -7.67022200 3.78478500 -3.41727200

PO-Co<sup>III</sup>-OH + H<sub>2</sub>O-Co<sup>III</sup>-OH bimetallic PO ring-opening in the terminal carbon and subsequent hydration

**PO-Co<sup>III</sup>-OH + H<sub>2</sub>O-Co<sup>III</sup>-OH bimetallic PO ring-opening in the terminal carbon**

PO-Co<sup>III</sup>-OH + H<sub>2</sub>O-Co<sup>III</sup>-OH = OH-Co<sup>III</sup>-PO-OH-Co<sup>III</sup>-H<sub>2</sub>O

Charge: 0

Spin Multiplicity: 1

Sum of electronic and thermal Free Energies (a.u.): -2779.357620

Thermal correction to Gibbs Free Energy (a.u.): 0.797713

Imaginary frequencies: -447.72

Calculation of single point energy based on the optimized structure, Et = -5256.5700238 a.u.

|    |             |             |             |
|----|-------------|-------------|-------------|
| C  | 5.26488300  | -3.45387500 | -3.09977400 |
| C  | 4.47624400  | -4.36705900 | -2.37565700 |
| C  | 5.33627800  | -2.12015600 | -2.73585900 |
| H  | 5.82323600  | -3.79741600 | -3.96651800 |
| C  | 3.77717100  | -3.91235000 | -1.27443600 |
| H  | 4.42168800  | -5.40782500 | -2.67559000 |
| C  | 4.61476500  | -1.62255300 | -1.62424400 |
| H  | 5.93584000  | -1.41250600 | -3.29873100 |
| C  | 3.82926800  | -2.55721700 | -0.87689400 |
| H  | 3.16282900  | -4.59564600 | -0.69277400 |
| O  | 4.72568900  | -0.35041500 | -1.32186900 |
| C  | 3.12166300  | -2.17974000 | 0.31017700  |
| Co | 3.43910300  | 0.57388600  | -0.26461400 |
| N  | 3.02380200  | -0.97702700 | 0.77349900  |
| H  | 2.62098500  | -2.98420300 | 0.85417900  |
| N  | 2.33033500  | 1.49715500  | 0.97532400  |
| C  | 2.19408600  | -0.69595500 | 1.95827900  |
| C  | 1.69374100  | 2.59317300  | 0.74656900  |
| C  | 2.33122600  | 0.79751100  | 2.26189000  |
| C  | 2.55456300  | -1.48790700 | 3.21926300  |
| H  | 1.00693700  | 2.97647900  | 1.50050100  |
| C  | 1.83683500  | 3.36930100  | -0.45443100 |
| C  | 1.30459800  | 1.20736300  | 3.31272000  |
| C  | 1.58596600  | -1.10253800 | 4.35034400  |
| H  | 3.58979800  | -1.25550600 | 3.50085700  |
| H  | 2.51070900  | -2.56463800 | 3.03199000  |
| C  | 0.93117600  | 4.42901100  | -0.67814000 |
| C  | 2.89769600  | 3.11846200  | -1.38120900 |
| C  | 1.57200200  | 0.41180400  | 4.60194700  |
| H  | 1.37570800  | 2.27976400  | 3.52575900  |
| H  | 0.29761600  | 0.99857400  | 2.93350800  |
| H  | 1.85385200  | -1.63607000 | 5.26844700  |
| H  | 0.57290000  | -1.42262300 | 4.07873700  |
| C  | 1.03502700  | 5.23255100  | -1.79862000 |
| H  | 0.12959100  | 4.58607000  | 0.03812100  |
| C  | 2.98361100  | 3.96353900  | -2.51323200 |
| O  | 3.80336500  | 2.17334600  | -1.22836500 |
| H  | 2.53986400  | 0.72148500  | 5.01924200  |
| H  | 0.81228400  | 0.65887400  | 5.35051900  |
| C  | 2.07367700  | 4.98991300  | -2.71425800 |
| H  | 0.32343600  | 6.03279900  | -1.96994200 |
| H  | 3.78679100  | 3.77458100  | -3.21781100 |
| H  | 2.16583500  | 5.61293100  | -3.59983000 |
| O  | 2.09865700  | 0.11153900  | -1.44596700 |
| H  | 2.26193800  | 0.65691300  | -2.22836800 |
| O  | 5.12545400  | 1.08579000  | 0.78959400  |
| H  | 5.21042000  | 1.94702000  | 0.33886900  |
| H  | 5.67202300  | 0.48142400  | 0.24853700  |
| C  | -0.62142000 | 1.02941700  | -1.21122200 |
| C  | 0.13698400  | -0.21631900 | -1.26521400 |
| O  | -1.66598900 | 0.07629000  | -1.13803100 |
| H  | -0.48693000 | 1.59849400  | -0.29235000 |
| H  | 0.29306800  | -0.75430800 | -0.34639200 |
| H  | 0.16518100  | -0.76104000 | -2.19721900 |
| C  | -0.69434100 | 1.91137700  | -2.43827600 |
| H  | -1.49587900 | 2.64634700  | -2.31849600 |
| H  | 0.24291400  | 2.45271400  | -2.59080500 |
| H  | -0.90695800 | 1.30277700  | -3.32285600 |

|    |             |             |             |
|----|-------------|-------------|-------------|
| C  | -1.69344900 | 4.56555200  | 2.06647400  |
| C  | -2.58588300 | 5.05320900  | 1.09428200  |
| C  | -1.50977300 | 3.20680400  | 2.25331100  |
| H  | -1.14109300 | 5.26526100  | 2.68895800  |
| C  | -3.32687500 | 4.13637700  | 0.37073700  |
| H  | -2.72051500 | 6.11914300  | 0.94747700  |
| C  | -2.19057000 | 2.23589400  | 1.46064500  |
| H  | -0.84302900 | 2.84164200  | 3.02382200  |
| C  | -3.16744800 | 2.74455800  | 0.53954200  |
| H  | -4.07102200 | 4.48298300  | -0.34335000 |
| O  | -1.90164300 | 0.97823300  | 1.61464700  |
| C  | -4.10247400 | 1.87485600  | -0.12374500 |
| Co | -2.60603600 | -0.45905900 | 0.54114500  |
| N  | -4.05662700 | 0.59171300  | -0.10705400 |
| H  | -4.93449200 | 2.36896200  | -0.62807400 |
| N  | -3.31785200 | -1.84790300 | -0.55914000 |
| C  | -5.10552900 | -0.26428500 | -0.65626900 |
| C  | -2.93361100 | -3.07476000 | -0.55256100 |
| C  | -4.36748500 | -1.35209800 | -1.45469900 |
| C  | -6.18851400 | 0.41527100  | -1.49113900 |
| H  | -3.43800200 | -3.78513300 | -1.20940600 |
| C  | -1.87919400 | -3.62066600 | 0.25132200  |
| C  | -5.34178900 | -2.39274700 | -2.00930600 |
| C  | -7.16932200 | -0.63234100 | -2.03588500 |
| H  | -5.72339000 | 0.95473600  | -2.32772700 |
| H  | -6.72782700 | 1.15298700  | -0.88709100 |
| C  | -1.64928400 | -5.01173200 | 0.16430900  |
| C  | -1.06060800 | -2.80733800 | 1.10184700  |
| C  | -6.43900600 | -1.71269700 | -2.84087300 |
| H  | -4.81387300 | -3.12270500 | -2.63176800 |
| H  | -5.79159800 | -2.94254300 | -1.17216900 |
| H  | -7.92969400 | -0.14433700 | -2.65499000 |
| H  | -7.69885000 | -1.10061100 | -1.19572400 |
| C  | -0.66358400 | -5.64146200 | 0.89967200  |
| H  | -2.28025200 | -5.59271100 | -0.50512900 |
| C  | -0.08581700 | -3.49576800 | 1.87933400  |
| O  | -1.12843200 | -1.51193700 | 1.18359000  |
| H  | -5.98584300 | -1.25585900 | -3.73111300 |
| H  | -7.14875000 | -2.46487700 | -3.20149500 |
| C  | 0.11181800  | -4.86023200 | 1.77560800  |
| H  | -0.50521000 | -6.71127100 | 0.81917800  |
| H  | 0.48713700  | -2.91091200 | 2.58321000  |
| H  | 0.86965000  | -5.33538000 | 2.39437500  |
| H  | -5.55522400 | -0.75340200 | 0.21806700  |
| H  | -3.85130600 | -0.84911900 | -2.28459500 |
| H  | 3.34102500  | 0.95705600  | 2.66582300  |
| H  | 1.14544100  | -0.88902900 | 1.69384200  |
| O  | -3.67435100 | -1.06118200 | 1.91657900  |
| H  | -3.30516100 | -0.60645400 | 2.68613800  |

**PO-Co<sup>III</sup>-OH + H<sub>2</sub>O-Co<sup>III</sup>-OH bimetallic PO ring-opening in the terminal carbon**

PO-Co<sup>III</sup>-OH + H<sub>2</sub>O-Co<sup>III</sup>-OH = OH-Co<sup>III</sup>-PO-OH-Co<sup>III</sup>-H<sub>2</sub>O

Charge: 0

Spin Multiplicity: 1

Sum of electronic and thermal Free Energies (a.u.): -2779.376556

Thermal correction to Gibbs Free Energy (a.u.): 0.794257

No imaginary frequency

Calculation of single point energy based on the optimized structure, Er = -5256.5872523 a.u.

|   |            |             |             |
|---|------------|-------------|-------------|
| C | 5.26861200 | -3.71159600 | -3.10746000 |
| C | 4.41586700 | -4.59350500 | -2.41727900 |
| C | 5.39312100 | -2.38818500 | -2.72406800 |
| H | 5.83582600 | -4.07230000 | -3.96151000 |
| C | 3.70644100 | -4.11547000 | -1.33287900 |
| H | 4.32098700 | -5.62772100 | -2.72986400 |
| C | 4.66434500 | -1.86612900 | -1.62569500 |
| H | 6.04306700 | -1.70367900 | -3.25920900 |
| C | 3.81047700 | -2.76934900 | -0.91488200 |
| H | 3.04480200 | -4.77618400 | -0.77723100 |
| O | 4.82684300 | -0.60513500 | -1.31076300 |
| C | 3.07466900 | -2.37064700 | 0.24911500  |

|    |             |             |             |
|----|-------------|-------------|-------------|
| Co | 3.63464600  | 0.37466400  | -0.19613500 |
| N  | 3.03900100  | -1.17947700 | 0.74500900  |
| H  | 2.49472900  | -3.15516200 | 0.74190100  |
| N  | 2.58220300  | 1.34383100  | 1.05558700  |
| C  | 2.16139000  | -0.87467500 | 1.88732500  |
| C  | 2.05045000  | 2.49750800  | 0.84115500  |
| C  | 2.43297400  | 0.57875900  | 2.29185700  |
| C  | 2.35235500  | -1.76510400 | 3.12080300  |
| H  | 1.35891500  | 2.90925000  | 1.57565900  |
| C  | 2.31882200  | 3.30315100  | -0.31725500 |
| C  | 1.39300200  | 1.03541800  | 3.31084300  |
| C  | 1.36604800  | -1.33832700 | 4.22096200  |
| H  | 3.38754200  | -1.66210700 | 3.47099500  |
| H  | 2.20887700  | -2.82070300 | 2.87240900  |
| C  | 1.51996300  | 4.44544800  | -0.53845400 |
| C  | 3.40283800  | 2.99794500  | -1.20254500 |
| C  | 1.50161000  | 0.15147600  | 4.56422300  |
| H  | 1.55259900  | 2.08419200  | 3.58563600  |
| H  | 0.39277700  | 0.94360500  | 2.87226200  |
| H  | 1.52021200  | -1.94931900 | 5.11679200  |
| H  | 0.34172400  | -1.52720300 | 3.87797700  |
| C  | 1.74420700  | 5.27932700  | -1.61831600 |
| H  | 0.70061300  | 4.64401000  | 0.14685300  |
| C  | 3.61538000  | 3.87843100  | -2.29147100 |
| O  | 4.21841300  | 1.98240900  | -1.04041900 |
| H  | 2.47243000  | 0.32994600  | 5.04604800  |
| H  | 0.73206500  | 0.44006800  | 5.28767300  |
| C  | 2.80496300  | 4.98379900  | -2.49314300 |
| H  | 1.11281500  | 6.14481800  | -1.78809400 |
| H  | 4.43480000  | 3.64887900  | -2.96465400 |
| H  | 2.99322800  | 5.63040300  | -3.34625500 |
| O  | 2.24292200  | 0.19780000  | -1.36127700 |
| H  | 2.68132700  | 0.33900900  | -2.21281100 |
| O  | 5.37430100  | 0.66058300  | 0.93380000  |
| H  | 5.51310900  | 1.53114100  | 0.51482000  |
| H  | 5.86571000  | 0.04627900  | 0.35635000  |
| C  | -0.46645400 | 0.91870900  | -1.20875200 |
| C  | -0.53560700 | -0.46992000 | -1.62927100 |
| O  | -1.76414300 | 0.21451500  | -1.21803400 |
| H  | -0.11326300 | 1.09109400  | -0.19985700 |
| H  | -0.20775900 | -1.23901700 | -0.94341100 |
| H  | -0.52158100 | -0.71243400 | -2.68849300 |
| C  | -0.36432200 | 2.05602700  | -2.17798600 |
| H  | -0.85024700 | 2.95159500  | -1.78112800 |
| H  | 0.69178000  | 2.27861900  | -2.34122100 |
| H  | -0.83029700 | 1.79093800  | -3.13183600 |
| C  | -1.34283300 | 4.60180000  | 1.94117100  |
| C  | -2.22259600 | 5.17170400  | 1.00169800  |
| C  | -1.28101300 | 3.23287700  | 2.12716900  |
| H  | -0.70299900 | 5.24678900  | 2.53836000  |
| C  | -3.07084600 | 4.33052800  | 0.30756900  |
| H  | -2.25966700 | 6.24546200  | 0.85555400  |
| C  | -2.08329300 | 2.33240100  | 1.36869300  |
| H  | -0.62084500 | 2.80556500  | 2.87046200  |
| C  | -3.03669300 | 2.92838200  | 0.47737000  |
| H  | -3.80189400 | 4.74490700  | -0.38331700 |
| O  | -1.91993700 | 1.05158900  | 1.53353400  |
| C  | -4.06354000 | 2.14984600  | -0.15716600 |
| Co | -2.77823600 | -0.31140200 | 0.49221700  |
| N  | -4.13607600 | 0.86589500  | -0.13874800 |
| H  | -4.85751800 | 2.71673400  | -0.64571700 |
| N  | -3.62903500 | -1.62678900 | -0.59944500 |
| C  | -5.27306400 | 0.10990200  | -0.66023700 |
| C  | -3.39625900 | -2.89308500 | -0.54625700 |
| C  | -4.65817400 | -1.04560200 | -1.46862600 |
| C  | -6.30637500 | 0.88271100  | -1.47677300 |
| H  | -4.00429400 | -3.56264100 | -1.15597200 |
| C  | -2.38392200 | -3.52451800 | 0.24394000  |
| C  | -5.73703200 | -1.99709000 | -1.98758100 |



|   |             |             |             |
|---|-------------|-------------|-------------|
| C | -7.39232300 | -0.07293900 | -1.99105500 |
| H | -5.81232300 | 1.37243200  | -2.32718800 |
| H | -6.76137800 | 1.67042200  | -0.86665800 |
| C | -2.31575000 | -4.93659600 | 0.21183400  |
| C | -1.43322200 | -2.77494300 | 1.01086900  |
| C | -6.78550700 | -1.22428600 | -2.80077300 |
| H | -5.29376600 | -2.77889800 | -2.61327600 |
| H | -6.21586900 | -2.49425300 | -1.13391600 |
| H | -8.11654700 | 0.47961500  | -2.59884900 |
| H | -7.94525300 | -0.48245600 | -1.13550300 |
| C | -1.35773200 | -5.63810300 | 0.91538300  |
| H | -3.04852100 | -5.47084800 | -0.38913900 |
| C | -0.47035800 | -3.53047700 | 1.73537400  |
| O | -1.37163600 | -1.47546500 | 1.05353200  |
| H | -6.31355600 | -0.82068700 | -3.70677800 |
| H | -7.57092700 | -1.90984900 | -3.13590200 |
| C | -0.43167900 | -4.91068000 | 1.68670500  |
| H | -1.32276800 | -6.72139500 | 0.88101300  |
| H | 0.22799300  | -2.98031300 | 2.34696000  |
| H | 0.32239800  | -5.44087900 | 2.26345500  |
| H | -5.74921800 | -0.33264100 | 0.22489800  |
| H | -4.13071700 | -0.59500200 | -2.32223300 |
| H | 3.42738700  | 0.60285800  | 2.76023800  |
| H | 1.12131700  | -0.94073600 | 1.53752100  |
| O | -3.85276600 | -0.82296300 | 1.88052300  |
| H | -3.42916400 | -0.40066600 | 2.64118300  |

**PO-Co<sup>III</sup>-OH + H<sub>2</sub>O-Co<sup>III</sup>-OH bimetallic PO ring-opening in the terminal carbon**

PO-Co<sup>III</sup>-OH + H<sub>2</sub>O-Co<sup>III</sup>-OH = OH-Co<sup>III</sup>-PO-OH-Co<sup>III</sup>-H<sub>2</sub>O

Charge: 0

Spin Multiplicity: 1

Sum of electronic and thermal Free Energies (a.u.): -2779.376645

Thermal correction to Gibbs Free Energy (a.u.): 0.802116

No imaginary frequency

Calculation of single point energy based on the optimized structure, Ep = -5256.5966207 a.u.

|    |            |             |             |
|----|------------|-------------|-------------|
| C  | 4.71319100 | -3.66880600 | -3.10917200 |
| C  | 3.89292800 | -4.50540700 | -2.33082800 |
| C  | 4.91978900 | -2.34188100 | -2.76743700 |
| H  | 5.18726700 | -4.06457200 | -4.00316800 |
| C  | 3.30187000 | -3.98872000 | -1.19387200 |
| H  | 3.72924600 | -5.53803200 | -2.61842700 |
| C  | 4.30793000 | -1.78164600 | -1.62394700 |
| H  | 5.54227800 | -1.69245900 | -3.37367900 |
| C  | 3.49737700 | -2.64007000 | -0.81829300 |
| H  | 2.65993000 | -4.60886600 | -0.57290100 |
| O  | 4.53436700 | -0.51437000 | -1.34211800 |
| C  | 2.89718500 | -2.19080000 | 0.40218200  |
| Co | 3.35326900 | 0.51951900  | -0.27038100 |
| N  | 2.89288900 | -0.96930700 | 0.82911800  |
| H  | 2.37907600 | -2.94346000 | 0.99913500  |
| N  | 2.32185400 | 1.53904000  | 0.95592900  |
| C  | 2.13416200 | -0.60421600 | 2.04109100  |
| C  | 1.70543600 | 2.63693700  | 0.67920500  |
| C  | 2.32686800 | 0.89461200  | 2.27212400  |
| C  | 2.52931200 | -1.34652900 | 3.32060800  |
| H  | 1.02884900 | 3.06505700  | 1.41722000  |
| C  | 1.86317800 | 3.35847700  | -0.55449200 |
| C  | 1.32842200 | 1.37534000  | 3.32003200  |
| C  | 1.59008600 | -0.89760800 | 4.45330200  |
| H  | 3.57345500 | -1.11144600 | 3.56562300  |
| H  | 2.46969000 | -2.42913700 | 3.18171300  |
| C  | 0.97650000 | 4.42174700  | -0.82789100 |
| C  | 2.91305800 | 3.04562200  | -1.47062900 |
| C  | 1.60220000 | 0.62735000  | 4.63716300  |
| H  | 1.42864500 | 2.45356900  | 3.48676600  |
| H  | 0.31180700 | 1.17367700  | 2.96361600  |
| H  | 1.86995800 | -1.39218000 | 5.38930200  |
| H  | 0.56853500 | -1.21698000 | 4.21437400  |
| C  | 1.10506700 | 5.17608700  | -1.98003600 |
| H  | 0.17043300 | 4.61873300  | -0.12737500 |

|    |             |             |             |
|----|-------------|-------------|-------------|
| C  | 3.03211000  | 3.84244000  | -2.63000900 |
| O  | 3.78070600  | 2.05939100  | -1.29089800 |
| H  | 2.58037200  | 0.93881400  | 5.02861600  |
| H  | 0.85670400  | 0.91863700  | 5.38380000  |
| C  | 2.14565600  | 4.88140000  | -2.87569200 |
| H  | 0.40756500  | 5.97931300  | -2.18999400 |
| H  | 3.83299000  | 3.60632900  | -3.32273300 |
| H  | 2.25690600  | 5.46787900  | -3.78344400 |
| O  | 1.93811400  | 0.12286000  | -1.49608500 |
| H  | 1.98010500  | 0.76454800  | -2.21998200 |
| O  | 5.03725100  | 0.94101600  | 0.69516900  |
| H  | 5.18550100  | 1.79038800  | 0.23375400  |
| H  | 5.56285500  | 0.29155600  | 0.18325300  |
| C  | -0.48899900 | 0.81755000  | -1.21818100 |
| C  | 0.54181800  | -0.31092700 | -1.27786700 |
| O  | -1.71476300 | 0.21169900  | -1.10502400 |
| H  | -0.24837700 | 1.45717700  | -0.35214100 |
| H  | 0.53559200  | -0.86317500 | -0.34559100 |
| H  | 0.30473800  | -0.98766700 | -2.10398100 |
| C  | -0.47009600 | 1.68615300  | -2.48455600 |
| H  | -1.21423400 | 2.47928900  | -2.37753500 |
| H  | 0.49488300  | 2.17096700  | -2.68151300 |
| H  | -0.74580200 | 1.07182400  | -3.34896500 |
| C  | -1.61486200 | 4.69641500  | 1.84131900  |
| C  | -2.52579700 | 5.12179800  | 0.85908200  |
| C  | -1.42227400 | 3.35025500  | 2.10357000  |
| H  | -1.05633900 | 5.43337200  | 2.41403500  |
| C  | -3.28275600 | 4.15796400  | 0.21311800  |
| H  | -2.66929900 | 6.17639600  | 0.65049500  |
| C  | -2.11180200 | 2.32816000  | 1.38309400  |
| H  | -0.74938100 | 3.03698400  | 2.89157300  |
| C  | -3.11693400 | 2.78131500  | 0.46132700  |
| H  | -4.04783600 | 4.45951800  | -0.49957200 |
| O  | -1.82461100 | 1.08423200  | 1.61270900  |
| C  | -4.07837700 | 1.87390300  | -0.11192900 |
| Co | -2.50849700 | -0.39144600 | 0.56338800  |
| N  | -4.02506400 | 0.59669500  | -0.02133800 |
| H  | -4.93222900 | 2.33849200  | -0.60829600 |
| N  | -3.20206200 | -1.81004800 | -0.51417600 |
| C  | -5.05621100 | -0.30161200 | -0.52725900 |
| C  | -2.75282900 | -3.01112400 | -0.55842700 |
| C  | -4.29759800 | -1.34506600 | -1.36913100 |
| C  | -6.20321000 | 0.33202700  | -1.31076500 |
| H  | -3.22524700 | -3.72699100 | -1.23342500 |
| C  | -1.67383800 | -3.53232500 | 0.23559600  |
| C  | -5.24225700 | -2.42076600 | -1.90833800 |
| C  | -7.15488400 | -0.75575200 | -1.82609700 |
| H  | -5.79962700 | 0.89684700  | -2.16237100 |
| H  | -6.74756200 | 1.04166100  | -0.67781700 |
| C  | -1.39001000 | -4.90892800 | 0.12372800  |
| C  | -0.91504500 | -2.71115300 | 1.13487400  |
| C  | -6.40613200 | -1.78400400 | -2.68109800 |
| H  | -4.70502500 | -3.11207200 | -2.56624600 |
| H  | -5.62999100 | -3.00836900 | -1.06572900 |
| H  | -7.96721500 | -0.29974500 | -2.40250600 |
| H  | -7.61996900 | -1.26343000 | -0.97072700 |
| C  | -0.42588400 | -5.53081600 | 0.89867300  |
| H  | -1.96637000 | -5.49213000 | -0.59172300 |
| C  | -0.00080700 | -3.40120600 | 1.98419000  |
| O  | -0.98474000 | -1.41762100 | 1.19637200  |
| H  | -6.01464000 | -1.28876400 | -3.58011300 |
| H  | -7.09165900 | -2.56545000 | -3.02675600 |
| C  | 0.24727900  | -4.75752700 | 1.86044500  |
| H  | -0.22885300 | -6.59261500 | 0.79831500  |
| H  | 0.47960400  | -2.82567300 | 2.76201900  |
| H  | 0.95965800  | -5.23149300 | 2.53234600  |
| H  | -5.44161000 | -0.81823600 | 0.36144200  |
| H  | -3.82363100 | -0.80463400 | -2.19988800 |
| H  | 3.34726600  | 1.04520100  | 2.65240600  |

|   |             |             |            |
|---|-------------|-------------|------------|
| H | 1.06945000  | -0.77750200 | 1.82765200 |
| O | -3.51581900 | -1.04796100 | 1.98873200 |
| H | -3.21960800 | -0.49973800 | 2.72771600 |

**subsequent hydration**

OH-Co<sup>III</sup>-PO-OH-Co<sup>III</sup>-H<sub>2</sub>O + H<sub>2</sub>O = PG + Co<sup>III</sup>(salen)-OH + H<sub>2</sub>O-Co<sup>III</sup>-OH

Charge: 0

Spin Multiplicity: 1

Sum of electronic and thermal Free Energies (a.u.): -2855.767568

Thermal correction to Gibbs Free Energy (a.u.): 0.822595

Imaginary frequencies: -495.71

Calculation of single point energy based on the optimized structure, Et = -5333.0399412 a.u.

|    |             |             |             |
|----|-------------|-------------|-------------|
| C  | 5.02132700  | -3.72626400 | -3.05810500 |
| C  | 4.17327200  | -4.58667000 | -2.33582500 |
| C  | 5.19289100  | -2.40551600 | -2.68214400 |
| H  | 5.54724100  | -4.10120500 | -3.93189500 |
| C  | 3.51619700  | -4.09260100 | -1.22663400 |
| H  | 4.04052500  | -5.61753400 | -2.64485700 |
| C  | 4.51659800  | -1.86693300 | -1.56018900 |
| H  | 5.84034700  | -1.73820900 | -3.24126700 |
| C  | 3.66856300  | -2.74774100 | -0.81662800 |
| H  | 2.85742400  | -4.73520500 | -0.64731500 |
| O  | 4.71714300  | -0.60562200 | -1.25475300 |
| C  | 2.97877800  | -2.32696900 | 0.36766700  |
| Co | 3.57418600  | 0.41009600  | -0.12215300 |
| N  | 2.95173400  | -1.12280700 | 0.83454500  |
| H  | 2.41625400  | -3.09940600 | 0.89653000  |
| N  | 2.52514900  | 1.40567100  | 1.09975900  |
| C  | 2.11129900  | -0.78720100 | 1.99828200  |
| C  | 1.95834400  | 2.52935400  | 0.81953500  |
| C  | 2.38388700  | 0.67728700  | 2.35870800  |
| C  | 2.33914600  | -1.63921200 | 3.25174100  |
| H  | 1.23910500  | 2.95010300  | 1.51967600  |
| C  | 2.22768900  | 3.28449600  | -0.37241800 |
| C  | 1.34001600  | 1.15318800  | 3.36403400  |
| C  | 1.33784000  | -1.20448400 | 4.33463800  |
| H  | 3.37125400  | -1.49352800 | 3.59599200  |
| H  | 2.22894100  | -2.70626600 | 3.03859300  |
| C  | 1.38285400  | 4.36837400  | -0.68992900 |
| C  | 3.35816900  | 2.98715600  | -1.19616100 |
| C  | 1.44646800  | 0.29710200  | 4.63794800  |
| H  | 1.50001900  | 2.20757900  | 3.61578500  |
| H  | 0.34383500  | 1.05131100  | 2.91940300  |
| H  | 1.49947000  | -1.78663000 | 5.24795800  |
| H  | 0.32153200  | -1.42774800 | 3.98801900  |
| C  | 1.62229300  | 5.15569900  | -1.80218700 |
| H  | 0.52350500  | 4.56141900  | -0.05529500 |
| C  | 3.59055100  | 3.82062900  | -2.31197800 |
| O  | 4.20067300  | 2.00166900  | -0.94960300 |
| H  | 2.40855100  | 0.50037900  | 5.12774100  |
| H  | 0.66426500  | 0.59271800  | 5.34450400  |
| C  | 2.73903600  | 4.87530600  | -2.60680700 |
| H  | 0.95628400  | 5.97544600  | -2.04861300 |
| H  | 4.45058900  | 3.59791300  | -2.93483200 |
| H  | 2.93880100  | 5.48845600  | -3.48153300 |
| O  | 2.18949200  | 0.33663900  | -1.34652400 |
| H  | 2.65667000  | 0.30366800  | -2.19332600 |
| O  | 5.26429000  | 0.64868900  | 0.99318900  |
| H  | 5.43548000  | 1.52819300  | 0.60081600  |
| H  | 5.79113500  | 0.03770100  | 0.44424300  |
| C  | -0.38662800 | 0.56060000  | -1.32797000 |
| C  | 0.50457800  | -0.66827800 | -1.64936100 |
| O  | -1.73660600 | 0.18091900  | -1.23791100 |
| H  | -0.03454500 | 0.93368100  | -0.36193200 |
| H  | 0.75908900  | -1.35670700 | -0.86177600 |
| H  | 0.88339800  | -0.86283100 | -2.63917600 |
| C  | -0.25211900 | 1.64658800  | -2.39514300 |
| H  | -0.86427900 | 2.50307100  | -2.10195500 |
| H  | 0.78071200  | 1.97821200  | -2.51027100 |
| H  | -0.62687200 | 1.27054000  | -3.35384300 |

|    |             |             |             |
|----|-------------|-------------|-------------|
| C  | -1.24490300 | 4.75077100  | 1.90630500  |
| C  | -2.09476500 | 5.29625500  | 0.92767300  |
| C  | -1.15809100 | 3.38284300  | 2.09805300  |
| H  | -0.64844400 | 5.41157700  | 2.53060200  |
| C  | -2.90712000 | 4.43059400  | 0.21770300  |
| H  | -2.15019300 | 6.36801600  | 0.77246700  |
| C  | -1.89680100 | 2.45710300  | 1.30298500  |
| H  | -0.53077100 | 2.97938000  | 2.88149500  |
| C  | -2.85287800 | 3.03255200  | 0.40027300  |
| H  | -3.63487400 | 4.82557200  | -0.48802200 |
| O  | -1.69422800 | 1.18231600  | 1.45607800  |
| C  | -3.90267600 | 2.24200100  | -0.18121700 |
| Co | -2.61598900 | -0.20874400 | 0.48579900  |
| N  | -4.00303700 | 0.96523900  | -0.08930900 |
| H  | -4.70284000 | 2.80275000  | -0.66645300 |
| N  | -3.59659000 | -1.56010900 | -0.45391400 |
| C  | -5.18371300 | 0.22082400  | -0.52133000 |
| C  | -3.42720900 | -2.82719900 | -0.32263100 |
| C  | -4.64209900 | -0.98581600 | -1.30396000 |
| C  | -6.23307600 | 0.98739700  | -1.32408900 |
| H  | -4.11041900 | -3.50644700 | -0.83365900 |
| C  | -2.37217400 | -3.45407400 | 0.42189900  |
| C  | -5.76625200 | -1.92450200 | -1.74174800 |
| C  | -7.36527300 | 0.04367200  | -1.75311000 |
| H  | -5.76397600 | 1.42802600  | -2.21439900 |
| H  | -6.64023900 | 1.81163600  | -0.72848900 |
| C  | -2.36721400 | -4.86711700 | 0.47317500  |
| C  | -1.32262700 | -2.70344800 | 1.05513000  |
| C  | -6.82421700 | -1.15298000 | -2.54317800 |
| H  | -5.36787100 | -2.74211300 | -2.35190100 |
| H  | -6.22711900 | -2.37354800 | -0.85194100 |
| H  | -8.10108600 | 0.59307000  | -2.35000700 |
| H  | -7.89057800 | -0.31853600 | -0.85947200 |
| C  | -1.38619100 | -5.57608300 | 1.13749300  |
| H  | -3.17240800 | -5.39770200 | -0.03043600 |
| C  | -0.34337900 | -3.47071200 | 1.75025400  |
| O  | -1.19209500 | -1.41349900 | 1.00212300  |
| H  | -6.37707400 | -0.79606000 | -3.48067400 |
| H  | -7.64104300 | -1.82721200 | -2.82191600 |
| C  | -0.37030800 | -4.85153100 | 1.78747700  |
| H  | -1.40382200 | -6.65986100 | 1.16666500  |
| H  | 0.41965700  | -2.92426600 | 2.28096200  |
| H  | 0.40146600  | -5.38254900 | 2.33994800  |
| O  | -1.00791600 | -1.85948100 | -2.21547700 |
| H  | -1.04848400 | -2.53768100 | -1.52573100 |
| H  | -1.58335000 | -1.03182900 | -1.82343700 |
| H  | -4.12994500 | -0.58957800 | -2.19249500 |
| H  | -5.62811700 | -0.16824300 | 0.40459600  |
| H  | 1.06156200  | -0.86362400 | 1.67897100  |
| H  | 3.37864500  | 0.72053700  | 2.82446200  |
| O  | -3.60533000 | -0.66032500 | 1.98360700  |
| H  | -3.19339000 | -0.12609900 | 2.67626400  |

**subsequent hydration**

OH-Co<sup>III</sup>-PO-OH-Co<sup>III</sup>-H<sub>2</sub>O + H<sub>2</sub>O = PG + Co<sup>III</sup>(salen)-OH + H<sub>2</sub>O-Co<sup>III</sup>-OH

Charge: 0

Spin Multiplicity: 1

Sum of electronic and thermal Free Energies (a.u.): -2855.804994

Thermal correction to Gibbs Free Energy (a.u.): 0.824016

No imaginary frequency

Calculation of single point energy based on the optimized structure, Er = -5333.0871495 a.u.

|   |            |             |             |
|---|------------|-------------|-------------|
| C | 4.49346100 | -3.89609900 | -3.06632700 |
| C | 3.67134800 | -4.68111400 | -2.23811500 |
| C | 4.76221500 | -2.57057200 | -2.76521200 |
| H | 4.91944900 | -4.33075900 | -3.96622800 |
| C | 3.14151500 | -4.11382400 | -1.09566700 |
| H | 3.45753800 | -5.71293700 | -2.49331500 |
| C | 4.21330300 | -1.95898100 | -1.61543800 |
| H | 5.38702500 | -1.96042300 | -3.40887200 |
| C | 3.40045200 | -2.76464700 | -0.75971500 |

|    |             |             |             |
|----|-------------|-------------|-------------|
| H  | 2.49952600  | -4.69366800 | -0.43713900 |
| O  | 4.48656300  | -0.68691600 | -1.38999500 |
| C  | 2.84857900  | -2.26449700 | 0.46493400  |
| Co | 3.46329400  | 0.41843400  | -0.23672900 |
| N  | 2.91304500  | -1.03880300 | 0.87136400  |
| H  | 2.30348400  | -2.98230700 | 1.08007200  |
| N  | 2.50271600  | 1.49936300  | 0.98775900  |
| C  | 2.18772400  | -0.61936600 | 2.08673500  |
| C  | 1.91169000  | 2.60254900  | 0.67315700  |
| C  | 2.47107000  | 0.86817200  | 2.30752500  |
| C  | 2.54238900  | -1.37438000 | 3.37084200  |
| H  | 1.23904000  | 3.06631800  | 1.39309500  |
| C  | 2.09406100  | 3.27734200  | -0.58171900 |
| C  | 1.50149800  | 1.41203100  | 3.35172600  |
| C  | 1.62802800  | -0.86636500 | 4.49884900  |
| H  | 3.59773800  | -1.19463400 | 3.61402500  |
| H  | 2.42552100  | -2.45368600 | 3.24185200  |
| C  | 1.22688900  | 4.34204400  | -0.90645400 |
| C  | 3.15743500  | 2.92038800  | -1.46627000 |
| C  | 1.72781300  | 0.65681000  | 4.67382900  |
| H  | 1.66182000  | 2.48433400  | 3.50947900  |
| H  | 0.47594600  | 1.26472200  | 2.99507000  |
| H  | 1.87792900  | -1.37024100 | 5.43825700  |
| H  | 0.59088300  | -1.13062400 | 4.25896900  |
| C  | 1.38739900  | 5.05390700  | -2.08155500 |
| H  | 0.41297700  | 4.57686100  | -0.22730600 |
| C  | 3.31010600  | 3.67510000  | -2.64763600 |
| O  | 4.01445200  | 1.94007500  | -1.22211600 |
| H  | 2.72118000  | 0.91317400  | 5.06672100  |
| H  | 0.99843500  | 0.99487700  | 5.41661400  |
| C  | 2.44144600  | 4.71571700  | -2.94564300 |
| H  | 0.70476200  | 5.85804100  | -2.33289200 |
| H  | 4.12067600  | 3.40654400  | -3.31680700 |
| H  | 2.57700400  | 5.26919100  | -3.87069500 |
| O  | 1.97880300  | 0.27071700  | -1.41937800 |
| H  | 2.33211800  | 0.06132200  | -2.29429200 |
| O  | 5.18701200  | 0.70979100  | 0.70431100  |
| H  | 5.36081000  | 1.55915100  | 0.24791500  |
| H  | 5.69064900  | 0.04920800  | 0.19003600  |
| C  | -0.43967800 | 0.80196400  | -1.24305700 |
| C  | 0.62919600  | -0.29294100 | -1.22413400 |
| O  | -1.65867300 | 0.15696500  | -1.09299700 |
| H  | -0.23499700 | 1.48429000  | -0.40549200 |
| H  | 0.61118500  | -0.79896400 | -0.26470700 |
| H  | 0.45178700  | -1.01079600 | -2.02722500 |
| C  | -0.42278800 | 1.60211800  | -2.54782800 |
| H  | -1.18830900 | 2.38134200  | -2.49960400 |
| H  | 0.54414700  | 2.08291700  | -2.72715500 |
| H  | -0.65888800 | 0.93963300  | -3.38801200 |
| C  | -1.27473100 | 4.83357100  | 1.81168100  |
| C  | -2.15444400 | 5.29913500  | 0.81924100  |
| C  | -1.15456700 | 3.48104300  | 2.08403800  |
| H  | -0.68233500 | 5.54408500  | 2.38344600  |
| C  | -2.95837800 | 4.37255300  | 0.17637600  |
| H  | -2.23963700 | 6.35813900  | 0.60166500  |
| C  | -1.88947700 | 2.49215000  | 1.36293800  |
| H  | -0.50445800 | 3.13888900  | 2.87892200  |
| C  | -2.86859600 | 2.99086600  | 0.43801900  |
| H  | -3.70431100 | 4.70870900  | -0.54090000 |
| O  | -1.65718300 | 1.23520200  | 1.58917800  |
| C  | -3.89242600 | 2.13637600  | -0.10671400 |
| Co | -2.49890700 | -0.22834900 | 0.63874700  |
| N  | -3.93513300 | 0.86189600  | 0.02597500  |
| H  | -4.71620700 | 2.64624000  | -0.60881800 |
| N  | -3.37718400 | -1.64116400 | -0.29974000 |
| C  | -5.06702300 | 0.04229400  | -0.39952000 |
| C  | -3.04614700 | -2.88047800 | -0.27388900 |
| C  | -4.44797800 | -1.13790700 | -1.16364500 |
| C  | -6.15684800 | 0.73314600  | -1.21564000 |

|   |             |             |             |
|---|-------------|-------------|-------------|
| H | -3.62622000 | -3.59157300 | -0.86287200 |
| C | -1.95175000 | -3.44141900 | 0.46955900  |
| C | -5.50837600 | -2.15084500 | -1.59537700 |
| C | -7.22933800 | -0.28499300 | -1.62734700 |
| H | -5.71307600 | 1.18299300  | -2.11430000 |
| H | -6.61222500 | 1.54321600  | -0.63519800 |
| C | -1.77968000 | -4.84153300 | 0.41362100  |
| C | -1.05733400 | -2.63635700 | 1.25339400  |
| C | -6.61503100 | -1.45643400 | -2.40172800 |
| H | -5.05446500 | -2.93666000 | -2.20724100 |
| H | -5.93548100 | -2.62865400 | -0.70358500 |
| H | -7.99972600 | 0.20834700  | -2.22994600 |
| H | -7.72841700 | -0.66587900 | -0.72635900 |
| C | -0.79430200 | -5.49493900 | 1.13178600  |
| H | -2.46089600 | -5.41359100 | -0.21297200 |
| C | -0.11297300 | -3.35217500 | 2.04749100  |
| O | -1.03951900 | -1.34110500 | 1.26749900  |
| H | -6.19195600 | -1.08440800 | -3.34437400 |
| H | -7.38891500 | -2.18370900 | -2.67027100 |
| C | 0.02466200  | -4.72707600 | 1.97868600  |
| H | -0.68341300 | -6.57217200 | 1.07428700  |
| H | 0.48065500  | -2.77615300 | 2.74203900  |
| H | 0.76451100  | -5.21964000 | 2.60608300  |
| O | -1.60314300 | -1.87461000 | -2.84942400 |
| H | -1.36036000 | -2.60069300 | -2.26163100 |
| H | -1.69491400 | -1.10889900 | -2.21922400 |
| H | -3.94898100 | -0.73566200 | -2.05510900 |
| H | -5.48928200 | -0.35740700 | 0.53196000  |
| H | 1.11302600  | -0.73014500 | 1.88051300  |
| H | 3.49836300  | 0.95869100  | 2.68808800  |
| O | -3.50202800 | -0.68768200 | 2.13328200  |
| H | -3.11603300 | -0.13180000 | 2.82378300  |

#### subsequent hydration

OH-Co<sup>III</sup>-PO-OH-Co<sup>III</sup>-H<sub>2</sub>O + H<sub>2</sub>O = PG + Co<sup>III</sup>(salen)-OH + H<sub>2</sub>O-Co<sup>III</sup>-OH

Charge: 0

Spin Multiplicity: 1

Sum of electronic and thermal Free Energies (a.u.): -2855.820250

Thermal correction to Gibbs Free Energy (a.u.): 0.821582

No imaginary frequency

Calculation of single point energy based on the optimized structure, Ep = -5333.0935943 a.u.

|    |            |             |             |
|----|------------|-------------|-------------|
| C  | 6.60913300 | -3.21928500 | -2.34973100 |
| C  | 5.92933100 | -4.21506000 | -1.62184700 |
| C  | 6.35611300 | -1.87731200 | -2.13520800 |
| H  | 7.34256100 | -3.50838300 | -3.09781400 |
| C  | 5.00101000 | -3.82573800 | -0.67748300 |
| H  | 6.13195300 | -5.26533700 | -1.80090100 |
| C  | 5.40079200 | -1.44855200 | -1.17715800 |
| H  | 6.87296900 | -1.10720600 | -2.69828100 |
| C  | 4.71702000 | -2.46208100 | -0.43243600 |
| H  | 4.46362800 | -4.57442400 | -0.09954700 |
| O  | 5.21683400 | -0.16412100 | -1.01435800 |
| C  | 3.75077500 | -2.15221600 | 0.58017000  |
| Co | 3.79563600 | 0.63072600  | -0.02558500 |
| N  | 3.36362400 | -0.97086000 | 0.92561000  |
| H  | 3.30927300 | -3.01221200 | 1.08817200  |
| N  | 2.50221900 | 1.46362100  | 1.08310300  |
| C  | 2.25792800 | -0.77811000 | 1.87858300  |
| C  | 1.81697600 | 2.50458100  | 0.75190100  |
| C  | 2.29517600 | 0.69281300  | 2.30947800  |
| C  | 2.26559200 | -1.68087100 | 3.11638400  |
| H  | 0.98819400 | 2.81761800  | 1.38416600  |
| C  | 2.07965800 | 3.31186600  | -0.40584700 |
| C  | 1.07413400 | 1.03317000  | 3.15827400  |
| C  | 1.05288400 | -1.35572200 | 4.00247600  |
| H  | 3.20137400 | -1.51668700 | 3.66649600  |
| H  | 2.24542800 | -2.73953900 | 2.83945900  |
| C  | 1.14479500 | 4.31125000  | -0.75205000 |
| C  | 3.28288800 | 3.15785800  | -1.16463200 |
| C  | 1.02973200 | 0.12558200  | 4.39649300  |

|    |             |             |             |
|----|-------------|-------------|-------------|
| H  | 1.11651400  | 2.08223600  | 3.47231600  |
| H  | 0.16322300  | 0.88996400  | 2.56546400  |
| H  | 1.06693200  | -1.98889800 | 4.89593800  |
| H  | 0.13309700  | -1.59255400 | 3.45426000  |
| C  | 1.35634800  | 5.14552100  | -1.83416500 |
| H  | 0.23988900  | 4.40211100  | -0.15850200 |
| C  | 3.47918500  | 4.03642900  | -2.25708200 |
| O  | 4.21732400  | 2.28051300  | -0.87983900 |
| H  | 1.88932700  | 0.34710700  | 5.04386100  |
| H  | 0.12920900  | 0.34586100  | 4.97903400  |
| C  | 2.53784400  | 4.99917500  | -2.58269100 |
| H  | 0.62367000  | 5.89989100  | -2.10013600 |
| H  | 4.39123400  | 3.92020400  | -2.83322700 |
| H  | 2.71717300  | 5.64889000  | -3.43540800 |
| O  | 2.52994500  | 0.21397700  | -1.27102400 |
| H  | 3.02332200  | 0.31370300  | -2.09803700 |
| O  | 5.36015300  | 1.22183600  | 1.23374900  |
| H  | 5.37259600  | 2.09714400  | 0.80037900  |
| H  | 6.00498100  | 0.70511900  | 0.71587800  |
| C  | -0.56702800 | 0.36553000  | -1.41345100 |
| C  | 0.01210800  | -0.99720300 | -1.89893000 |
| O  | -2.01144200 | 0.21425200  | -1.31172500 |
| H  | -0.20607300 | 0.58842200  | -0.41146400 |
| H  | 0.49777600  | -1.52440600 | -1.08007300 |
| H  | 0.75443500  | -0.83115500 | -2.67825900 |
| C  | -0.26928500 | 1.50987000  | -2.36514900 |
| H  | -0.74611400 | 2.43081400  | -2.02102800 |
| H  | 0.81077600  | 1.66426800  | -2.39852700 |
| H  | -0.63555600 | 1.27940000  | -3.37232300 |
| C  | -1.59574000 | 4.63228800  | 1.78576700  |
| C  | -2.53049100 | 5.15817100  | 0.87458500  |
| C  | -1.47057600 | 3.26841500  | 1.97841200  |
| H  | -0.96206200 | 5.30694400  | 2.35565400  |
| C  | -3.37541300 | 4.27766100  | 0.22746000  |
| H  | -2.61507900 | 6.22809700  | 0.72077100  |
| C  | -2.25219300 | 2.32907800  | 1.24683400  |
| H  | -0.77501500 | 2.87720700  | 2.70801000  |
| C  | -3.27662400 | 2.87986200  | 0.40718200  |
| H  | -4.15802400 | 4.65548400  | -0.42682100 |
| O  | -2.02188100 | 1.05674400  | 1.40470700  |
| C  | -4.33481200 | 2.05949100  | -0.10560000 |
| Co | -2.90798500 | -0.34074900 | 0.44535100  |
| N  | -4.36961400 | 0.77500100  | -0.03555100 |
| H  | -5.19589000 | 2.58874100  | -0.51635100 |
| N  | -3.84840100 | -1.69672700 | -0.54091200 |
| C  | -5.55123400 | -0.02343800 | -0.35199100 |
| C  | -3.55063200 | -2.95123300 | -0.53382500 |
| C  | -5.04337500 | -1.18024400 | -1.22429600 |
| C  | -6.73048200 | 0.69584800  | -1.00179600 |
| H  | -4.22281800 | -3.65148200 | -1.03093300 |
| C  | -2.37225200 | -3.53027100 | 0.03632300  |
| C  | -6.15817100 | -2.18430000 | -1.52081000 |
| C  | -7.85610600 | -0.30769800 | -1.29130700 |
| H  | -6.40663800 | 1.16931700  | -1.93891400 |
| H  | -7.09855000 | 1.49128300  | -0.34499800 |
| C  | -2.20528300 | -4.93155800 | -0.10416100 |
| C  | -1.35401300 | -2.74181200 | 0.67808600  |
| C  | -7.36013600 | -1.47059600 | -2.15804800 |
| H  | -5.80396400 | -2.97036700 | -2.19580700 |
| H  | -6.45983000 | -2.66830600 | -0.58293900 |
| H  | -8.69214000 | 0.20159300  | -1.78192700 |
| H  | -8.23944900 | -0.70047400 | -0.34050400 |
| C  | -1.07695300 | -5.58163900 | 0.34567000  |
| H  | -2.99976600 | -5.49358500 | -0.58999900 |
| C  | -0.19518700 | -3.45055400 | 1.11286300  |
| O  | -1.39956900 | -1.45828300 | 0.84408800  |
| H  | -7.06894800 | -1.08788800 | -3.14554400 |
| H  | -8.16733400 | -2.19076300 | -2.32769800 |
| C  | -0.06351200 | -4.81423400 | 0.95475000  |

|   |             |             |             |
|---|-------------|-------------|-------------|
| H | -0.96648700 | -6.65364800 | 0.22746300  |
| H | 0.58545300  | -2.87243800 | 1.58202500  |
| H | 0.84050700  | -5.30362300 | 1.30859900  |
| O | -1.05111900 | -1.79926100 | -2.45860600 |
| H | -1.21312800 | -2.53551500 | -1.85196800 |
| H | -2.16891300 | -0.56510700 | -1.89415400 |
| H | -4.70209600 | -0.74015500 | -2.17471600 |
| H | -5.85848000 | -0.45637100 | 0.60915000  |
| H | 1.32212700  | -0.91928900 | 1.32061900  |
| H | 3.20692300  | 0.83540700  | 2.90724500  |
| O | -3.81111400 | -0.89537200 | 1.93890500  |
| H | -3.37617600 | -0.39430900 | 2.64322900  |

PO-Co<sup>III</sup>-OH + H<sub>2</sub>O-Co<sup>III</sup>-OH bimetallic PO ring-opening in the middle carbon and subsequent hydration

**PO-Co<sup>III</sup>-OH + H<sub>2</sub>O-Co<sup>III</sup>-OH bimetallic PO ring-opening in the middle carbon**

PO-Co<sup>III</sup>-OH + H<sub>2</sub>O-Co<sup>III</sup>-OH = OH-Co<sup>III</sup>-PO-OH-Co<sup>III</sup>-H<sub>2</sub>O

Charge: 0

Spin Multiplicity: 1

Sum of electronic and thermal Free Energies (a.u.): -2779.354743

Thermal correction to Gibbs Free Energy (a.u.): 0.795676

Imaginary frequencies: -342.79

Calculation of single point energy based on the optimized structure, Et = -5256.5666315 a.u.

|    |             |             |             |
|----|-------------|-------------|-------------|
| C  | 6.93448500  | -1.87191900 | 3.16688700  |
| C  | 6.56812000  | -0.88906300 | 4.10718400  |
| C  | 6.39368100  | -1.88307400 | 1.89490800  |
| H  | 7.65223800  | -2.63886100 | 3.44519600  |
| C  | 5.65339100  | 0.07433100  | 3.73463500  |
| H  | 6.99674700  | -0.89142500 | 5.10328700  |
| C  | 5.44706600  | -0.90824900 | 1.48667000  |
| H  | 6.67058800  | -2.64014900 | 1.16882800  |
| C  | 5.07739300  | 0.09130900  | 2.44206400  |
| H  | 5.35484300  | 0.84543500  | 4.44125100  |
| O  | 4.99025200  | -0.96144200 | 0.26198900  |
| C  | 4.14349600  | 1.13498900  | 2.14051300  |
| Co | 3.51359100  | 0.03560800  | -0.41671900 |
| N  | 3.50527900  | 1.29091800  | 1.02902600  |
| H  | 3.96459800  | 1.85217700  | 2.94424700  |
| N  | 2.16640800  | 1.11597600  | -1.17803800 |
| C  | 2.46434200  | 2.32197200  | 0.87458400  |
| C  | 1.26530300  | 0.69225900  | -2.00061000 |
| C  | 2.22058300  | 2.47588200  | -0.63360600 |
| C  | 2.74765600  | 3.68626400  | 1.50845900  |
| H  | 0.44667700  | 1.35235000  | -2.26784400 |
| C  | 1.28594800  | -0.60250900 | -2.62579900 |
| C  | 1.03292700  | 3.39240600  | -0.90991400 |
| C  | 1.57198600  | 4.63940100  | 1.23498100  |
| H  | 3.67614400  | 4.09118000  | 1.08524900  |
| H  | 2.89801000  | 3.59419900  | 2.58880100  |
| C  | 0.15065700  | -1.01722800 | -3.35756700 |
| C  | 2.45783000  | -1.42028700 | -2.59591000 |
| C  | 1.27118200  | 4.76371700  | -0.26395000 |
| H  | 0.87247100  | 3.50835800  | -1.98409700 |
| H  | 0.11611500  | 2.95061400  | -0.50585400 |
| H  | 1.78743900  | 5.62330500  | 1.66495800  |
| H  | 0.67972200  | 4.25922800  | 1.75055900  |
| C  | 0.16903300  | -2.19013500 | -4.09072300 |
| H  | -0.75366600 | -0.42501100 | -3.27803700 |
| C  | 2.44958900  | -2.60988900 | -3.35830100 |
| O  | 3.55027200  | -1.10543700 | -1.92891600 |
| H  | 2.11461200  | 5.26005200  | -0.76275900 |
| H  | 0.39035900  | 5.39237200  | -0.42696900 |
| C  | 1.33336700  | -2.97729700 | -4.09382600 |
| H  | -0.71229900 | -2.50660900 | -4.63756500 |
| H  | 3.34548300  | -3.22173600 | -3.34394000 |
| H  | 1.35684400  | -3.90048700 | -4.66694900 |
| O  | 2.29753600  | -1.01925700 | 0.49151800  |
| H  | 2.64397500  | -1.90859900 | 0.32886900  |
| O  | 4.98418700  | 1.01005800  | -1.48133800 |
| H  | 4.80642100  | 0.44883700  | -2.26243600 |



|    |             |             |             |
|----|-------------|-------------|-------------|
| H  | 5.70397600  | 0.53739800  | -1.02307300 |
| C  | 0.19822600  | -1.28950000 | 0.60648000  |
| C  | -0.27900300 | 0.00285400  | 1.09929400  |
| O  | -1.53886200 | -0.61432000 | 1.09205900  |
| H  | 0.05740000  | -1.45397100 | -0.45338200 |
| H  | -0.18569500 | 0.83144000  | 0.39440600  |
| H  | 0.06682800  | 0.28512900  | 2.10348700  |
| C  | 0.34144200  | -2.48035100 | 1.49888900  |
| H  | 0.98817900  | -3.22845100 | 1.03435600  |
| H  | 0.74967700  | -2.19863100 | 2.47236600  |
| H  | -0.63706400 | -2.94674400 | 1.63273700  |
| C  | -1.32553900 | -5.24212400 | -0.87558600 |
| C  | -2.07888700 | -5.65991700 | 0.23897200  |
| C  | -1.42747800 | -3.95606800 | -1.37067100 |
| H  | -0.64692100 | -5.94197000 | -1.35713600 |
| C  | -2.93287200 | -4.75108000 | 0.83318800  |
| H  | -1.99371500 | -6.67268300 | 0.61792300  |
| C  | -2.28646400 | -2.99222200 | -0.77110800 |
| H  | -0.84266000 | -3.63334600 | -2.22354200 |
| C  | -3.04807000 | -3.42217700 | 0.36606700  |
| H  | -3.53217600 | -5.04739800 | 1.69187000  |
| O  | -2.32965100 | -1.79516700 | -1.27868100 |
| C  | -3.95756900 | -2.54368900 | 1.04757300  |
| Co | -2.91576700 | -0.27199500 | -0.30212300 |
| N  | -4.04946500 | -1.27727000 | 0.84404800  |
| H  | -4.60831400 | -3.00934100 | 1.78993600  |
| N  | -3.46956300 | 1.25013600  | 0.71619500  |
| C  | -4.99667900 | -0.40107100 | 1.52620100  |
| C  | -3.34838100 | 2.47564600  | 0.34281200  |
| C  | -4.17696300 | 0.84352700  | 1.93279900  |
| C  | -5.74587100 | -0.99365000 | 2.71818400  |
| H  | -3.76778000 | 3.26418600  | 0.97047600  |
| C  | -2.72739200 | 2.91401000  | -0.87696100 |
| C  | -5.05737200 | 1.90075100  | 2.59881000  |
| C  | -6.63171800 | 0.07280900  | 3.37659100  |
| H  | -5.02227400 | -1.37585300 | 3.45118600  |
| H  | -6.35981100 | -1.84155500 | 2.39575800  |
| C  | -2.80368300 | 4.28423900  | -1.20324600 |
| C  | -2.05753000 | 2.00226200  | -1.75868500 |
| C  | -5.81160700 | 1.29894300  | 3.79280700  |
| H  | -4.45106900 | 2.74930600  | 2.93486100  |
| H  | -5.77529000 | 2.28538900  | 1.86244000  |
| H  | -7.14572300 | -0.35402200 | 4.24450800  |
| H  | -7.41166100 | 0.38169600  | 2.66812900  |
| C  | -2.29507800 | 4.78193000  | -2.39035400 |
| H  | -3.29554700 | 4.95386700  | -0.50047300 |
| C  | -1.61304700 | 2.53151600  | -3.00406700 |
| O  | -1.78437800 | 0.76885800  | -1.45676800 |
| H  | -5.08932100 | 1.00589300  | 4.56681500  |
| H  | -6.46101100 | 2.05856100  | 4.24110000  |
| C  | -1.71929100 | 3.87873200  | -3.30223400 |
| H  | -2.37127900 | 5.83731400  | -2.62840900 |
| H  | -1.18479200 | 1.83964400  | -3.72176500 |
| H  | -1.35713900 | 4.24092500  | -4.26110100 |
| H  | -5.70718400 | -0.07921900 | 0.75361700  |
| H  | -3.40856400 | 0.50058500  | 2.63961600  |
| H  | 3.12768300  | 2.92965000  | -1.05794000 |
| H  | 1.54750200  | 1.91162800  | 1.31542800  |
| O  | -4.35005400 | 0.03064700  | -1.42430500 |
| H  | -4.20108800 | -0.61155900 | -2.13196000 |

**PO-Co<sup>III</sup>-OH + H<sub>2</sub>O-Co<sup>III</sup>-OH bimetallic PO ring-opening in the middle carbon**

PO-Co<sup>III</sup>-OH + H<sub>2</sub>O-Co<sup>III</sup>-OH = OH-Co<sup>III</sup>-PO-OH-Co<sup>III</sup>-H<sub>2</sub>O

Charge: 0

Spin Multiplicity: 1

Sum of electronic and thermal Free Energies (a.u.): -2779.379965

Thermal correction to Gibbs Free Energy (a.u.): 0.792769

No imaginary frequency

Calculation of single point energy based on the optimized structure, Er = -5256.590821 a.u.

|   |            |             |            |
|---|------------|-------------|------------|
| C | 7.46998100 | -1.49365100 | 3.36704100 |
|---|------------|-------------|------------|

|    |             |             |             |
|----|-------------|-------------|-------------|
| C  | 7.46104700  | -0.15099500 | 3.79452000  |
| C  | 6.64088400  | -1.92668100 | 2.35028200  |
| H  | 8.13768000  | -2.20447800 | 3.84660300  |
| C  | 6.60099500  | 0.73317900  | 3.17642600  |
| H  | 8.11387300  | 0.17777500  | 4.59567000  |
| C  | 5.74854600  | -1.03792700 | 1.69265600  |
| H  | 6.64154100  | -2.96040500 | 2.02070000  |
| C  | 5.73984800  | 0.32550500  | 2.13008200  |
| H  | 6.56991200  | 1.77398600  | 3.49133300  |
| O  | 5.01020600  | -1.50837900 | 0.72305400  |
| C  | 4.86215400  | 1.30818100  | 1.56486200  |
| Co | 3.70069800  | -0.54929000 | -0.27159700 |
| N  | 4.03088700  | 1.11625700  | 0.59716400  |
| H  | 4.90854700  | 2.29753900  | 2.02292300  |
| N  | 2.51381900  | 0.42725300  | -1.39415000 |
| C  | 3.04682900  | 2.12950400  | 0.19125600  |
| C  | 1.53674200  | -0.08573300 | -2.06526600 |
| C  | 2.76395100  | 1.86866400  | -1.29713700 |
| C  | 3.42178400  | 3.59130200  | 0.44136800  |
| H  | 0.83711300  | 0.57960300  | -2.57087300 |
| C  | 1.29503700  | -1.49346400 | -2.20886300 |
| C  | 1.68172000  | 2.79623100  | -1.84021500 |
| C  | 2.33289300  | 4.52364300  | -0.11124100 |
| H  | 4.38227300  | 3.80431900  | -0.04665000 |
| H  | 3.55374300  | 3.77878100  | 1.51200500  |
| C  | 0.09143200  | -1.90645600 | -2.82342000 |
| C  | 2.24812800  | -2.46653500 | -1.77300900 |
| C  | 2.06549500  | 4.26044900  | -1.59650700 |
| H  | 1.52596200  | 2.62387700  | -2.90794600 |
| H  | 0.72524000  | 2.58521800  | -1.34842100 |
| H  | 2.62535400  | 5.56690400  | 0.04886900  |
| H  | 1.40405300  | 4.36618400  | 0.45384700  |
| C  | -0.19692500 | -3.24647200 | -3.00412100 |
| H  | -0.64126800 | -1.15192400 | -3.09043400 |
| C  | 1.92571000  | -3.83137500 | -1.97312400 |
| O  | 3.40726100  | -2.16439300 | -1.23839700 |
| H  | 2.96490000  | 4.50676900  | -2.17722800 |
| H  | 1.26113000  | 4.90477500  | -1.96226900 |
| C  | 0.73525400  | -4.20737700 | -2.57279200 |
| H  | -1.13088400 | -3.54834500 | -3.46470900 |
| H  | 2.64749800  | -4.56828300 | -1.63674000 |
| H  | 0.51715400  | -5.26403400 | -2.70355900 |
| O  | 2.35870000  | -0.87436800 | 0.92100500  |
| H  | 2.62600700  | -1.72346300 | 1.30134700  |
| O  | 5.24869000  | -0.36549700 | -1.67766800 |
| H  | 4.87247100  | -1.12931900 | -2.15825900 |
| H  | 5.90746300  | -0.77863100 | -1.09209600 |
| C  | -0.80932600 | -1.57736500 | 0.39692400  |
| C  | -0.39291400 | -0.23522500 | 0.77502900  |
| O  | -1.78543700 | -0.63877400 | 0.98393600  |
| H  | -1.02579300 | -1.74824500 | -0.64924600 |
| H  | -0.27115800 | 0.51235700  | 0.00128500  |
| H  | 0.16598700  | -0.09166100 | 1.69161700  |
| C  | -0.48642800 | -2.78834500 | 1.21649200  |
| H  | 0.43068700  | -3.23431600 | 0.81931400  |
| H  | -0.32538700 | -2.52597900 | 2.26573900  |
| H  | -1.29045600 | -3.52618600 | 1.14642800  |
| C  | -3.75534900 | -5.16126900 | -0.28246600 |
| C  | -4.39791900 | -5.15406800 | 0.97189700  |
| C  | -3.44860500 | -3.98401600 | -0.93683700 |
| H  | -3.49278900 | -6.10941300 | -0.74457100 |
| C  | -4.72118300 | -3.93854700 | 1.54107000  |
| H  | -4.63621600 | -6.08429600 | 1.47599500  |
| C  | -3.75490600 | -2.71638100 | -0.36886000 |
| H  | -2.94383500 | -3.98446300 | -1.89620200 |
| C  | -4.40731200 | -2.71423500 | 0.90782500  |
| H  | -5.22423600 | -3.90472800 | 2.50520700  |
| O  | -3.42875900 | -1.64599400 | -1.03383200 |
| C  | -4.79247100 | -1.49523000 | 1.56002600  |

|    |             |             |             |
|----|-------------|-------------|-------------|
| Co | -3.27104000 | 0.07108000  | -0.25725500 |
| N  | -4.45209900 | -0.31298400 | 1.17791600  |
| H  | -5.42524000 | -1.60258800 | 2.44264400  |
| N  | -3.06602300 | 1.78834800  | 0.55233100  |
| C  | -4.90291400 | 0.92085300  | 1.81753000  |
| C  | -2.62423600 | 2.83321800  | -0.05940200 |
| C  | -3.65212500 | 1.82307200  | 1.89528500  |
| C  | -5.57941500 | 0.78383500  | 3.18030500  |
| H  | -2.66102500 | 3.79749600  | 0.45040100  |
| C  | -2.08789200 | 2.85177200  | -1.39098500 |
| C  | -3.99136600 | 3.20087100  | 2.46288500  |
| C  | -5.91877600 | 2.16926600  | 3.74807500  |
| H  | -4.90785100 | 0.25468900  | 3.87010200  |
| H  | -6.49195400 | 0.18470500  | 3.09197400  |
| C  | -1.77849400 | 4.10569700  | -1.96255000 |
| C  | -1.86033600 | 1.64702100  | -2.13784300 |
| C  | -4.67495700 | 3.06131100  | 3.83067300  |
| H  | -3.08538200 | 3.80896100  | 2.56211500  |
| H  | -4.65938200 | 3.72227800  | 1.76483700  |
| H  | -6.37700100 | 2.06338900  | 4.73706500  |
| H  | -6.66695600 | 2.64914200  | 3.10351700  |
| C  | -1.28547100 | 4.21806000  | -3.24931000 |
| H  | -1.95238100 | 4.99984600  | -1.36746800 |
| C  | -1.37107100 | 1.79812800  | -3.46660400 |
| O  | -2.02795100 | 0.45259700  | -1.66002000 |
| H  | -3.96444600 | 2.62783100  | 4.54737300  |
| H  | -4.94119000 | 4.05220000  | 4.21353400  |
| C  | -1.09391200 | 3.04278700  | -4.00114600 |
| H  | -1.06839700 | 5.19040900  | -3.67787000 |
| H  | -1.24089400 | 0.89643000  | -4.05572400 |
| H  | -0.72863300 | 3.11321200  | -5.02246100 |
| H  | -5.59072500 | 1.38850800  | 1.10063600  |
| H  | -2.93769500 | 1.32109500  | 2.56400500  |
| H  | 3.70280100  | 2.05534600  | -1.83860400 |
| H  | 2.12494400  | 1.88976800  | 0.73998000  |
| O  | -4.66186600 | 0.75517500  | -1.22988500 |
| H  | -4.82351800 | 0.05677900  | -1.87996000 |

**PO-Co<sup>III</sup>-OH + H<sub>2</sub>O-Co<sup>III</sup>-OH bimetallic PO ring-opening in the middle carbon**

PO-Co<sup>III</sup>-OH + H<sub>2</sub>O-Co<sup>III</sup>-OH = OH-Co<sup>III</sup>-PO-OH-Co<sup>III</sup>-H<sub>2</sub>O

Charge: 0

Spin Multiplicity: 1

Sum of electronic and thermal Free Energies (a.u.): -2779.373971

Thermal correction to Gibbs Free Energy (a.u.): 0.799552

No imaginary frequency

Calculation of single point energy based on the optimized structure, E<sub>p</sub> = -5256.5948158 a.u.

|    |            |             |             |
|----|------------|-------------|-------------|
| C  | 6.81433000 | -1.78150600 | 3.15588500  |
| C  | 6.50377400 | -0.75116300 | 4.06320200  |
| C  | 6.21720500 | -1.84240500 | 1.90948200  |
| H  | 7.53293500 | -2.54609500 | 3.43731500  |
| C  | 5.58581500 | 0.20828500  | 3.68779400  |
| H  | 6.97551100 | -0.71471500 | 5.03873700  |
| C  | 5.26969500 | -0.87216800 | 1.50239400  |
| H  | 6.45116200 | -2.63621600 | 1.20807600  |
| C  | 4.95514800 | 0.17510700  | 2.42122700  |
| H  | 5.32731200 | 1.01370600  | 4.37091600  |
| O  | 4.75080000 | -0.98216100 | 0.29851300  |
| C  | 4.01316800 | 1.21255000  | 2.11665300  |
| Co | 3.34197700 | 0.07664300  | -0.42037500 |
| N  | 3.33716900 | 1.33725200  | 1.02433100  |
| H  | 3.86302800 | 1.95642400  | 2.90051400  |
| N  | 2.03328300 | 1.17990300  | -1.20742900 |
| C  | 2.30106200 | 2.37490800  | 0.86002000  |
| C  | 1.16016100 | 0.78440600  | -2.07574800 |
| C  | 2.08756800 | 2.53933600  | -0.64981700 |
| C  | 2.57248100 | 3.73044700  | 1.51497100  |
| H  | 0.36822400 | 1.46587900  | -2.36253600 |
| C  | 1.18038200 | -0.49898400 | -2.72156200 |
| C  | 0.89876000 | 3.45157200  | -0.93258400 |
| C  | 1.39716400 | 4.68154000  | 1.23057600  |

|    |             |             |             |
|----|-------------|-------------|-------------|
| H  | 3.50791300  | 4.14491700  | 1.11609400  |
| H  | 2.69808300  | 3.62538900  | 2.59734600  |
| C  | 0.06518000  | -0.88360800 | -3.49767200 |
| C  | 2.32811000  | -1.34148700 | -2.65552500 |
| C  | 1.12098900  | 4.81808700  | -0.27155400 |
| H  | 0.74848700  | 3.57846500  | -2.00687800 |
| H  | -0.01460700 | 2.99445900  | -0.54101800 |
| H  | 1.60294800  | 5.66148400  | 1.67379000  |
| H  | 0.49892400  | 4.29200700  | 1.72723800  |
| C  | 0.09668600  | -2.04148000 | -4.25339000 |
| H  | -0.83230600 | -0.28068700 | -3.43311300 |
| C  | 2.33638700  | -2.51712300 | -3.43225700 |
| O  | 3.40048600  | -1.05644200 | -1.92807700 |
| H  | 1.96819200  | 5.32567800  | -0.75277700 |
| H  | 0.23750300  | 5.44057100  | -0.44225100 |
| C  | 1.24611000  | -2.84758100 | -4.22515000 |
| H  | -0.76892300 | -2.33814300 | -4.83473900 |
| H  | 3.21803700  | -3.14766000 | -3.38869900 |
| H  | 1.27699800  | -3.76114000 | -4.81258300 |
| O  | 2.15967700  | -1.06971600 | 0.56699000  |
| H  | 2.65537400  | -1.90321000 | 0.52405400  |
| O  | 4.78793200  | 1.01181000  | -1.42827400 |
| H  | 4.63440600  | 0.44921000  | -2.21840400 |
| H  | 5.54235600  | 0.58275300  | -0.98386000 |
| C  | 0.69404800  | -1.39484100 | 0.51200200  |
| C  | -0.11161300 | -0.18680400 | 1.02019000  |
| O  | -1.42640100 | -0.52400300 | 1.19121500  |
| H  | 0.43399200  | -1.60805100 | -0.52410400 |
| H  | 0.02200400  | 0.64464300  | 0.31185700  |
| H  | 0.35758400  | 0.12060100  | 1.98277000  |
| C  | 0.51789800  | -2.61729000 | 1.38901400  |
| H  | 0.99667100  | -3.50409500 | 0.95924700  |
| H  | 0.92139900  | -2.42618300 | 2.38982300  |
| H  | -0.55071300 | -2.81192900 | 1.47531600  |
| C  | -1.11387400 | -5.24231500 | -1.02720800 |
| C  | -1.89564900 | -5.71730800 | 0.04352500  |
| C  | -1.18673900 | -3.92573000 | -1.43963200 |
| H  | -0.43736700 | -5.92172500 | -1.54085000 |
| C  | -2.74860800 | -4.83234600 | 0.67558500  |
| H  | -1.83444100 | -6.75324600 | 0.35965100  |
| C  | -2.04414600 | -2.98470500 | -0.79818700 |
| H  | -0.58181800 | -3.56083100 | -2.26030100 |
| C  | -2.83867400 | -3.47635100 | 0.29164000  |
| H  | -3.36891100 | -5.17268400 | 1.50268100  |
| O  | -2.05164400 | -1.75960900 | -1.22418000 |
| C  | -3.74926300 | -2.63289300 | 1.01775600  |
| Co | -2.74814200 | -0.28475600 | -0.23116900 |
| N  | -3.85283100 | -1.36030000 | 0.87960700  |
| H  | -4.39499500 | -3.14193300 | 1.73587600  |
| N  | -3.40521900 | 1.19706600  | 0.77634000  |
| C  | -4.81073500 | -0.53728800 | 1.61338100  |
| C  | -3.37817900 | 2.42625500  | 0.40670900  |
| C  | -4.03069200 | 0.73450100  | 2.01363300  |
| C  | -5.48343700 | -1.18610800 | 2.82278600  |
| H  | -3.83321000 | 3.18524500  | 1.04652900  |
| C  | -2.81718400 | 2.90469200  | -0.83064100 |
| C  | -4.92071900 | 1.73556200  | 2.74833600  |
| C  | -6.37684500 | -0.17334700 | 3.55164200  |
| H  | -4.71099800 | -1.55882900 | 3.50908500  |
| H  | -6.08154300 | -2.04819700 | 2.50830400  |
| C  | -3.00738000 | 4.26000700  | -1.16244800 |
| C  | -2.09094100 | 2.04128400  | -1.71801000 |
| C  | -5.58629400 | 1.07366600  | 3.96250000  |
| H  | -4.33401000 | 2.60243300  | 3.07294200  |
| H  | -5.69345100 | 2.10570300  | 2.06110900  |
| H  | -6.83202000 | -0.64328400 | 4.43042000  |
| H  | -7.20159100 | 0.12314500  | 2.88983600  |
| C  | -2.56450800 | 4.79154600  | -2.36352900 |
| H  | -3.53641400 | 4.89311100  | -0.45251400 |

|   |             |             |             |
|---|-------------|-------------|-------------|
| C | -1.72616200 | 2.59666800  | -2.97937100 |
| O | -1.69635000 | 0.84494500  | -1.40549200 |
| H | -4.81293900 | 0.78908100  | 4.68881800  |
| H | -6.24171600 | 1.79294700  | 4.46589100  |
| C | -1.94362800 | 3.93025500  | -3.28381500 |
| H | -2.72937000 | 5.83640300  | -2.60374500 |
| H | -1.26942100 | 1.93722500  | -3.71046200 |
| H | -1.63607200 | 4.31113500  | -4.25472700 |
| H | -5.56715400 | -0.23380400 | 0.87727400  |
| H | -3.20318300 | 0.41047000  | 2.65831900  |
| H | 3.00035000  | 2.99524000  | -1.05958300 |
| H | 1.37815400  | 1.95604900  | 1.27747200  |
| O | -4.19794500 | -0.06410900 | -1.38597100 |
| H | -4.00428000 | -0.70086700 | -2.08703200 |

#### subsequent hydration

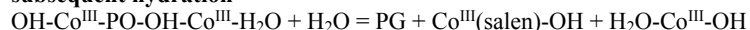

Charge: 0

Spin Multiplicity: 1

Sum of electronic and thermal Free Energies (a.u.): -2855.766279

Thermal correction to Gibbs Free Energy (a.u.): 0.819327

Imaginary frequencies: -429.18

Calculation of single point energy based on the optimized structure, Et = -5333.0400512 a.u.

|    |             |             |             |
|----|-------------|-------------|-------------|
| C  | 5.79580300  | -3.20407300 | -2.56368400 |
| C  | 4.83455700  | -4.17376800 | -2.22046500 |
| C  | 5.75270800  | -1.93223300 | -2.02263400 |
| H  | 6.58669600  | -3.45568300 | -3.26510200 |
| C  | 3.83276100  | -3.83117400 | -1.33501100 |
| C  | 4.73865800  | -1.55812600 | -1.10465700 |
| C  | 3.75416300  | -2.53710300 | -0.76832400 |
| H  | 3.07353400  | -4.55390400 | -1.05679300 |
| O  | 4.77389600  | -0.34281600 | -0.60983500 |
| C  | 2.67238500  | -2.26799500 | 0.13640900  |
| Co | 3.52491700  | 0.42693600  | 0.58022600  |
| N  | 2.47998500  | -1.16152200 | 0.77697900  |
| H  | 1.95640900  | -3.07964600 | 0.26807500  |
| N  | 2.35404600  | 1.18918700  | 1.87660200  |
| C  | 1.28891700  | -0.95288500 | 1.61997900  |
| C  | 2.12915900  | 2.45583300  | 1.99723900  |
| C  | 1.64305900  | 0.15141000  | 2.62948600  |
| C  | 0.75713400  | -2.18086600 | 2.36000000  |
| H  | 1.34093800  | 2.78701100  | 2.67401500  |
| C  | 2.83049600  | 3.47799600  | 1.27635400  |
| C  | 0.39738400  | 0.59038800  | 3.39892100  |
| C  | -0.49095100 | -1.77444600 | 3.15646100  |
| H  | 1.53523100  | -2.58109000 | 3.02446200  |
| H  | 0.48489700  | -2.96597900 | 1.65221900  |
| C  | 2.31466300  | 4.79313800  | 1.29419700  |
| C  | 4.05154100  | 3.19331300  | 0.58572000  |
| C  | -0.21300100 | -0.61916600 | 4.12403900  |
| H  | 0.64573000  | 1.36958900  | 4.12786600  |
| H  | -0.32932700 | 1.01157000  | 2.69272900  |
| H  | -0.88441500 | -2.63947300 | 3.70200000  |
| H  | -1.25810600 | -1.46595100 | 2.43966800  |
| C  | 2.96025700  | 5.82290500  | 0.63746000  |
| H  | 1.38347600  | 4.97798800  | 1.82413600  |
| C  | 4.70268700  | 4.27227100  | -0.05836900 |
| O  | 4.60468800  | 2.00578200  | 0.56218500  |
| H  | 0.47805300  | -0.95367400 | 4.90927500  |
| H  | -1.13758300 | -0.31662000 | 4.62831100  |
| C  | 4.16649100  | 5.54800900  | -0.03525400 |
| H  | 4.68509700  | 6.35094800  | -0.55204100 |
| O  | 2.49122100  | 1.05923800  | -0.81065600 |
| H  | 2.83204800  | 0.63578700  | -1.61109900 |
| O  | 4.87369100  | -0.08891400 | 2.04441100  |
| H  | 5.24811200  | 0.81544600  | 2.02264800  |
| H  | 5.46634200  | -0.59437100 | 1.46050700  |
| H  | 0.48105600  | -0.57988200 | 0.97638800  |
| H  | 2.37713700  | -0.26574700 | 3.33393000  |
| C  | 0.46790000  | 1.69333000  | -0.83990500 |

|    |             |             |             |
|----|-------------|-------------|-------------|
| C  | -0.21197900 | 0.38162700  | -1.19348800 |
| O  | -1.17223500 | 0.05436700  | -0.21617200 |
| H  | 0.75707000  | 1.86606300  | 0.17460300  |
| H  | 0.57393800  | -0.37986300 | -1.25768800 |
| H  | -0.66554500 | 0.47413500  | -2.18563400 |
| C  | 0.74658200  | 2.72466200  | -1.88549700 |
| H  | -0.19668700 | 3.05663600  | -2.32850900 |
| H  | 1.29258200  | 3.57647300  | -1.48058000 |
| H  | 1.33371200  | 2.27710900  | -2.69233000 |
| O  | -1.27857900 | 2.48160000  | -0.02147300 |
| H  | -1.47301300 | 1.45737800  | 0.06185100  |
| H  | -1.89972200 | 2.79425200  | -0.69741800 |
| H  | 5.62886600  | 4.05658500  | -0.58001900 |
| H  | 2.54883200  | 6.82624000  | 0.64241700  |
| H  | 6.49110700  | -1.18059900 | -2.28119300 |
| H  | 4.87965000  | -5.17010500 | -2.64649000 |
| C  | 0.57146300  | -4.30528200 | -2.34375800 |
| C  | 0.38976000  | -4.98890400 | -1.12224300 |
| C  | -0.19183700 | -3.20205200 | -2.66552400 |
| H  | 1.32737900  | -4.64999500 | -3.04388000 |
| C  | -0.57041900 | -4.52329000 | -0.24316200 |
| H  | 0.97199400  | -5.87470800 | -0.89008800 |
| C  | -1.20091500 | -2.70327900 | -1.78743500 |
| H  | -0.06333400 | -2.68300000 | -3.60951200 |
| C  | -1.35536300 | -3.38440700 | -0.53094900 |
| H  | -0.74444000 | -5.04265400 | 0.69759500  |
| O  | -1.91871900 | -1.70164800 | -2.17751600 |
| C  | -2.35934500 | -2.99456500 | 0.41938900  |
| Co | -2.90690200 | -0.58067000 | -0.99569000 |
| N  | -3.05628100 | -1.91615400 | 0.35025700  |
| H  | -2.53212000 | -3.68517600 | 1.24731400  |
| N  | -3.86547400 | 0.54328200  | 0.22194100  |
| C  | -4.15723300 | -1.59385900 | 1.25650400  |
| C  | -4.42109100 | 1.66428700  | -0.08801500 |
| C  | -4.01771600 | -0.08484800 | 1.53709400  |
| C  | -4.26445400 | -2.41335900 | 2.54152000  |
| H  | -5.03765800 | 2.16957500  | 0.65687000  |
| C  | -4.27443900 | 2.35601700  | -1.33637700 |
| C  | -5.15641000 | 0.42906800  | 2.41829200  |
| C  | -5.41418100 | -1.88811300 | 3.41220200  |
| H  | -3.32366700 | -2.35258900 | 3.10285000  |
| H  | -4.43118000 | -3.46923900 | 2.30261900  |
| C  | -4.93328300 | 3.60095700  | -1.48220000 |
| C  | -3.45028800 | 1.85378300  | -2.40227600 |
| C  | -5.24785800 | -0.39414600 | 3.71061200  |
| H  | -5.00535000 | 1.48573100  | 2.66390200  |
| H  | -6.09989200 | 0.35494100  | 1.86213600  |
| H  | -5.46616100 | -2.46018100 | 4.34483800  |
| H  | -6.36604000 | -2.04877700 | 2.88937000  |
| C  | -4.80507800 | 4.36464700  | -2.62343400 |
| H  | -5.55122400 | 3.95254200  | -0.65853700 |
| C  | -3.33217400 | 2.67379000  | -3.56459500 |
| O  | -2.78814000 | 0.74577800  | -2.36154600 |
| H  | -4.33415500 | -0.24219700 | 4.30229900  |
| H  | -6.08065300 | -0.03143400 | 4.32247700  |
| C  | -3.98733200 | 3.88376400  | -3.66773300 |
| H  | -5.31773400 | 5.31582300  | -2.71628400 |
| H  | -2.71023200 | 2.29543600  | -4.36925000 |
| H  | -3.87249800 | 4.47441200  | -4.57304600 |
| H  | -5.06428400 | -1.72178500 | 0.65161500  |
| H  | -3.06342000 | 0.06112700  | 2.06646700  |
| O  | -4.54675000 | -1.14610900 | -1.64039100 |
| H  | -4.31545200 | -1.50896400 | -2.50629000 |

**subsequent hydration**

$\text{OH-Co}^{\text{III}}\text{-PO-OH-Co}^{\text{III}}\text{-H}_2\text{O} + \text{H}_2\text{O} = \text{PG} + \text{Co}^{\text{III}}(\text{salen})\text{-OH} + \text{H}_2\text{O-Co}^{\text{III}}\text{-OH}$

Charge: 0

Spin Multiplicity: 1

Sum of electronic and thermal Free Energies (a.u.): -2855.809526

Thermal correction to Gibbs Free Energy (a.u.): 0.824196

No imaginary frequency

Calculation of single point energy based on the optimized structure, Er = -5333.0872546 a.u.

|    |             |             |             |
|----|-------------|-------------|-------------|
| C  | 5.91371500  | -2.80446800 | -2.33269100 |
| C  | 5.00041700  | -3.84600900 | -2.09116700 |
| C  | 5.75923100  | -1.56528700 | -1.73455900 |
| H  | 6.75522800  | -2.96972400 | -2.99971700 |
| C  | 3.93436000  | -3.61398600 | -1.24450900 |
| C  | 4.67530000  | -1.30505000 | -0.86379700 |
| C  | 3.74480100  | -2.35841200 | -0.62183700 |
| H  | 3.20702700  | -4.39364300 | -1.04632100 |
| O  | 4.59516000  | -0.10232000 | -0.32333700 |
| C  | 2.60985500  | -2.20977300 | 0.24733800  |
| Co | 3.21762300  | 0.53420700  | 0.80443400  |
| N  | 2.29883300  | -1.14548000 | 0.91014500  |
| H  | 1.95720800  | -3.07980900 | 0.32501500  |
| N  | 1.89452300  | 1.16132900  | 2.00698100  |
| C  | 1.06624100  | -1.06540300 | 1.72298000  |
| C  | 1.48344900  | 2.38229400  | 2.06449500  |
| C  | 1.30600000  | 0.04605400  | 2.75413000  |
| C  | 0.65294900  | -2.35393200 | 2.43177900  |
| H  | 0.60458000  | 2.61303400  | 2.65854200  |
| C  | 2.10995500  | 3.46366000  | 1.35097700  |
| C  | 0.04777400  | 0.34592300  | 3.56554200  |
| C  | -0.61467000 | -2.08183800 | 3.25406900  |
| H  | 1.47031900  | -2.70043800 | 3.07986900  |
| H  | 0.44623900  | -3.14142000 | 1.70473500  |
| C  | 1.41934800  | 4.68677500  | 1.23291200  |
| C  | 3.41911900  | 3.32194700  | 0.79976000  |
| C  | -0.42392100 | -0.94104500 | 4.25940800  |
| H  | 0.26044700  | 1.11616700  | 4.31615600  |
| H  | -0.73047700 | 0.74021400  | 2.90399400  |
| H  | -0.92942000 | -2.99641700 | 3.76887300  |
| H  | -1.41457400 | -1.81227100 | 2.55832700  |
| C  | 1.99034500  | 5.76649900  | 0.58314500  |
| H  | 0.41565500  | 4.75244900  | 1.64307800  |
| C  | 3.98898600  | 4.44377000  | 0.16155300  |
| O  | 4.12147200  | 2.20582400  | 0.88926000  |
| H  | 0.31318000  | -1.23968000 | 5.01720500  |
| H  | -1.36118500 | -0.74741700 | 4.79251500  |
| C  | 3.28670900  | 5.63523600  | 0.05616600  |
| H  | 3.74595900  | 6.47770000  | -0.45341600 |
| O  | 2.32985000  | 1.12560300  | -0.78730700 |
| H  | 2.78962600  | 0.70416600  | -1.52848100 |
| O  | 4.45201500  | 0.12461700  | 2.30520100  |
| H  | 4.74372800  | 1.05975300  | 2.36826700  |
| H  | 5.15048400  | -0.30516600 | 1.77730600  |
| H  | 0.25371000  | -0.74675400 | 1.04535700  |
| H  | 2.09528800  | -0.30224600 | 3.43606500  |
| C  | 0.91707400  | 1.41413600  | -1.12249100 |
| C  | 0.10095700  | 0.12761600  | -1.34684900 |
| O  | -0.91711600 | -0.03305800 | -0.39175900 |
| H  | 0.54672600  | 1.93672200  | -0.24653300 |
| H  | 0.80330700  | -0.72369900 | -1.33007300 |
| H  | -0.32128200 | 0.15795900  | -2.35568700 |
| C  | 0.94292700  | 2.35816200  | -2.31101700 |
| H  | -0.08012600 | 2.67260800  | -2.53563700 |
| H  | 1.55138100  | 3.24129800  | -2.09729500 |
| H  | 1.33419200  | 1.85834500  | -3.20609100 |
| O  | -1.24310400 | 2.09833500  | 1.11063400  |
| H  | -1.16097400 | 1.26757800  | 0.54236600  |
| H  | -1.74775300 | 2.69581700  | 0.54370800  |
| H  | 4.98557300  | 4.33564100  | -0.25270300 |
| H  | 1.44689900  | 6.69927100  | 0.48038300  |
| H  | 6.45961300  | -0.75702600 | -1.91664700 |
| H  | 5.12967800  | -4.81332100 | -2.56399800 |
| C  | 0.77680000  | -4.41430300 | -2.42342500 |
| C  | 0.56719400  | -5.07350100 | -1.19311800 |
| C  | 0.02509800  | -3.31449000 | -2.78279400 |
| H  | 1.54342100  | -4.77750000 | -3.10277100 |

|    |             |             |             |
|----|-------------|-------------|-------------|
| C  | -0.41633000 | -4.59063600 | -0.34778100 |
| H  | 1.13993500  | -5.95752600 | -0.93176800 |
| C  | -0.99877200 | -2.79055900 | -1.93525600 |
| H  | 0.17650000  | -2.81380200 | -3.73334600 |
| C  | -1.18739900 | -3.45354500 | -0.67258200 |
| H  | -0.62130000 | -5.09856900 | 0.59320200  |
| O  | -1.69632900 | -1.78799300 | -2.35271900 |
| C  | -2.23261700 | -3.05462500 | 0.23139300  |
| Co | -2.65563300 | -0.60840900 | -1.18563900 |
| N  | -2.90444400 | -1.96391100 | 0.13183500  |
| H  | -2.46761600 | -3.75229500 | 1.03839700  |
| N  | -3.61238800 | 0.51912100  | 0.02451900  |
| C  | -4.06617900 | -1.63638800 | 0.95623700  |
| C  | -3.98429000 | 1.72624300  | -0.22381800 |
| C  | -3.90332000 | -0.14496400 | 1.29733000  |
| C  | -4.32260400 | -2.49664900 | 2.19175400  |
| H  | -4.57631700 | 2.25716600  | 0.52350500  |
| C  | -3.64796700 | 2.48400100  | -1.39319700 |
| C  | -5.10386100 | 0.38173200  | 2.08504900  |
| C  | -5.53873100 | -1.95969800 | 2.95926300  |
| H  | -3.44577900 | -2.48872200 | 2.85103300  |
| H  | -4.49569900 | -3.53751000 | 1.89692800  |
| C  | -4.07424600 | 3.83343700  | -1.44754700 |
| C  | -2.89055000 | 1.92745200  | -2.48243800 |
| C  | -5.35330600 | -0.48366800 | 3.32826800  |
| H  | -4.93721900 | 1.41966400  | 2.39099300  |
| H  | -5.98848700 | 0.36925100  | 1.43545300  |
| H  | -5.70685900 | -2.56038500 | 3.85983100  |
| H  | -6.43530600 | -2.06700400 | 2.33495400  |
| C  | -3.77719700 | 4.65218800  | -2.51717800 |
| H  | -4.65164300 | 4.22093900  | -0.61010400 |
| C  | -2.61224400 | 2.80042100  | -3.57939100 |
| O  | -2.44251700 | 0.72054700  | -2.53287800 |
| H  | -4.49887200 | -0.38694800 | 4.01298100  |
| H  | -6.23064200 | -0.11187700 | 3.86852200  |
| C  | -3.03627400 | 4.11297600  | -3.59027700 |
| H  | -4.10983400 | 5.68435100  | -2.53759400 |
| H  | -2.05338900 | 2.37927300  | -4.40880200 |
| H  | -2.79842700 | 4.74078100  | -4.44547500 |
| H  | -4.91574000 | -1.71298400 | 0.26545400  |
| H  | -2.99859900 | -0.03516800 | 1.91483100  |
| O  | -4.30197300 | -1.10777200 | -1.88656900 |
| H  | -4.06220400 | -1.42855900 | -2.76640300 |

#### subsequent hydration

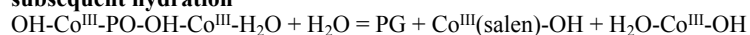

Charge: 0

Spin Multiplicity: 1

Sum of electronic and thermal Free Energies (a.u.): -2855.824873

Thermal correction to Gibbs Free Energy (a.u.): 0.822440

No imaginary frequency

Calculation of single point energy based on the optimized structure,  $E_p = -5333.1009234$  a.u.

|    |            |             |             |
|----|------------|-------------|-------------|
| C  | 6.41594300 | -2.50435700 | -2.95229700 |
| C  | 5.56398700 | -3.60136200 | -2.71749200 |
| C  | 6.25807100 | -1.31615200 | -2.26414100 |
| H  | 7.21040200 | -2.58990100 | -3.68885600 |
| C  | 4.55747300 | -3.46883500 | -1.78237800 |
| C  | 5.23100800 | -1.15311500 | -1.29770100 |
| C  | 4.36396100 | -2.26560400 | -1.06377800 |
| H  | 3.88439500 | -4.29741300 | -1.58137700 |
| O  | 5.15056700 | -0.00963300 | -0.66659800 |
| C  | 3.28009300 | -2.21476900 | -0.12660400 |
| Co | 3.76466000 | 0.52430100  | 0.51478600  |
| N  | 2.96894700 | -1.20793900 | 0.61920700  |
| H  | 2.66199900 | -3.11024800 | -0.07508600 |
| N  | 2.47476200 | 1.04173800  | 1.81479500  |
| C  | 1.73824800 | -1.21341300 | 1.42573500  |
| C  | 2.09312500 | 2.25565200  | 2.02661300  |
| C  | 1.90193500 | -0.12208500 | 2.49484100  |
| C  | 1.35810400 | -2.54030500 | 2.08592400  |



|    |             |             |             |
|----|-------------|-------------|-------------|
| H  | 1.27001600  | 2.43276900  | 2.72015600  |
| C  | 2.67432300  | 3.41909700  | 1.42217400  |
| C  | 0.59323700  | 0.09027700  | 3.25642800  |
| C  | 0.05536200  | -2.35729500 | 2.87785300  |
| H  | 2.17312300  | -2.86391300 | 2.74670700  |
| H  | 1.21275200  | -3.31713100 | 1.33202100  |
| C  | 2.02726900  | 4.66243100  | 1.59843700  |
| C  | 3.90374700  | 3.34805600  | 0.69352100  |
| C  | 0.15846600  | -1.22999300 | 3.91082800  |
| H  | 0.71354100  | 0.85944200  | 4.02686300  |
| H  | -0.17842000 | 0.43096400  | 2.55469500  |
| H  | -0.22140800 | -3.29892600 | 3.36546300  |
| H  | -0.74406100 | -2.11266900 | 2.17127400  |
| C  | 2.54038000  | 5.82407000  | 1.05520300  |
| H  | 1.09788600  | 4.68758000  | 2.16288400  |
| C  | 4.41353600  | 4.55724400  | 0.15882700  |
| O  | 4.59222700  | 2.24578900  | 0.53817800  |
| H  | 0.88456600  | -1.50591500 | 4.68703900  |
| H  | -0.80375600 | -1.09146800 | 4.41695600  |
| C  | 3.74649800  | 5.75689200  | 0.33199200  |
| H  | 4.16167400  | 6.66273200  | -0.10159800 |
| O  | 2.62119200  | 0.98514400  | -0.82955200 |
| H  | 3.21939000  | 1.13305100  | -1.57599200 |
| O  | 5.20830200  | 0.16155100  | 1.99352500  |
| H  | 5.43222400  | 1.11298000  | 1.98631500  |
| H  | 5.83638700  | -0.21779100 | 1.35305300  |
| H  | 0.92197200  | -0.91179100 | 0.75836200  |
| H  | 2.67433000  | -0.47159400 | 3.19559800  |
| C  | -0.48711400 | 2.64868800  | -0.28602200 |
| C  | -0.45007200 | 1.15130000  | -0.57337400 |
| O  | -1.47178300 | 0.51499900  | 0.25806000  |
| H  | -0.07541400 | 2.84383800  | 0.70873400  |
| H  | 0.52591500  | 0.72487200  | -0.35607200 |
| H  | -0.69476600 | 0.95341100  | -1.61705400 |
| C  | 0.30226400  | 3.43324400  | -1.32005800 |
| H  | -0.13786400 | 3.30200300  | -2.31502600 |
| H  | 0.30992300  | 4.49752000  | -1.07318600 |
| H  | 1.33041700  | 3.05967000  | -1.33696500 |
| O  | -1.86585000 | 3.04797300  | -0.18124700 |
| H  | -2.02938000 | 1.28279500  | 0.51227100  |
| H  | -2.30396500 | 2.73061100  | -0.99303700 |
| H  | 5.34367900  | 4.50233900  | -0.39676800 |
| H  | 2.02615300  | 6.77006800  | 1.18441800  |
| H  | 6.91009400  | -0.46753300 | -2.44276900 |
| H  | 5.69681000  | -4.52990900 | -3.26196500 |
| C  | 1.12623900  | -3.30982800 | -2.70173200 |
| C  | 0.93371400  | -4.32117000 | -1.73404800 |
| C  | 0.27961700  | -2.22400300 | -2.77680200 |
| H  | 1.95830700  | -3.38527100 | -3.39552700 |
| C  | -0.10494300 | -4.18802500 | -0.83588300 |
| H  | 1.58337800  | -5.18957400 | -1.70567500 |
| C  | -0.82430400 | -2.07507100 | -1.88676800 |
| H  | 0.41846500  | -1.45029600 | -3.52377900 |
| C  | -0.97802300 | -3.07350100 | -0.86812700 |
| H  | -0.27521100 | -4.95169100 | -0.07957700 |
| O  | -1.62203600 | -1.06664100 | -2.05703300 |
| C  | -2.02342600 | -3.01051200 | 0.10799600  |
| Co | -2.95158500 | -0.48361800 | -0.84566800 |
| N  | -2.84160500 | -2.02661900 | 0.27007200  |
| H  | -2.10974500 | -3.87766500 | 0.76484100  |
| N  | -4.24759900 | 0.15052800  | 0.40973800  |
| C  | -3.96215600 | -2.07611300 | 1.21638900  |
| C  | -5.20792200 | 0.95995500  | 0.10424900  |
| C  | -4.20151800 | -0.61818900 | 1.65502600  |
| C  | -3.79823300 | -3.00236000 | 2.42365600  |
| H  | -6.00607700 | 1.12508900  | 0.82916200  |
| C  | -5.32239300 | 1.67921100  | -1.12792000 |
| C  | -5.40490200 | -0.50092200 | 2.58816700  |
| C  | -5.00024400 | -2.87314900 | 3.37009500  |

|   |             |             |             |
|---|-------------|-------------|-------------|
| H | -2.87539000 | -2.74239800 | 2.95749700  |
| H | -3.70129000 | -4.04332500 | 2.09904100  |
| C | -6.50106000 | 2.42196000  | -1.36240100 |
| C | -4.26314100 | 1.69844900  | -2.08960300 |
| C | -5.22227800 | -1.42006100 | 3.80364500  |
| H | -5.53402300 | 0.53696600  | 2.91420400  |
| H | -6.31485500 | -0.78814100 | 2.04531900  |
| H | -4.85115600 | -3.51416700 | 4.24540400  |
| H | -5.90125000 | -3.23994900 | 2.86105500  |
| C | -6.66940600 | 3.16138200  | -2.51653800 |
| H | -7.28720500 | 2.39558700  | -0.61098100 |
| C | -4.45813500 | 2.47324400  | -3.25977200 |
| O | -3.10878100 | 1.10685100  | -1.90855100 |
| H | -4.35872400 | -1.07862900 | 4.39064000  |
| H | -6.09608100 | -1.34661700 | 4.45936400  |
| C | -5.62921700 | 3.18041200  | -3.46516500 |
| H | -7.58310600 | 3.71962100  | -2.68899100 |
| H | -3.65372100 | 2.48628900  | -3.98766300 |
| H | -5.74706300 | 3.75913400  | -4.37742500 |
| H | -4.83921800 | -2.37940700 | 0.62860000  |
| H | -3.29983800 | -0.29440700 | 2.19640400  |
| O | -4.30493300 | -1.30333100 | -1.76108500 |
| H | -3.90929300 | -1.45383700 | -2.63137600 |

PO + H<sub>2</sub>O-Co<sup>III</sup>-OH PO ring-opening in the terminal carbon and subsequent hydration

**PO + H<sub>2</sub>O-Co<sup>III</sup>-OH PO ring-opening in the terminal carbon**

PO + H<sub>2</sub>O-Co<sup>III</sup>-OH = PO-OH-Co<sup>III</sup>-H<sub>2</sub>O

Charge: 0

Spin Multiplicity: 1

Sum of electronic and thermal Free Energies (a.u.): -1524.367487

Thermal correction to Gibbs Free Energy (a.u.): 0.435066

Imaginary frequencies: -453.18

Calculation of single point energy based on the optimized structure, Et = -2763.0959824 a.u.

|    |             |             |             |
|----|-------------|-------------|-------------|
| C  | 4.65984800  | -2.91413000 | -0.12585600 |
| C  | 5.26541800  | -1.71796800 | 0.30530000  |
| C  | 3.34461300  | -2.93878800 | -0.55207900 |
| H  | 5.23213200  | -3.83771600 | -0.11779600 |
| C  | 4.52183500  | -0.55610700 | 0.28966700  |
| H  | 6.29521800  | -1.71239600 | 0.64467000  |
| C  | 2.55491600  | -1.76231600 | -0.56716300 |
| H  | 2.87240300  | -3.85976000 | -0.87718000 |
| C  | 3.17368300  | -0.54527400 | -0.14134400 |
| H  | 4.96505100  | 0.38105200  | 0.61746000  |
| O  | 1.31715500  | -1.85081400 | -0.98954600 |
| C  | 2.48330500  | 0.70841400  | -0.14346600 |
| Co | -0.00587200 | -0.51214500 | -0.78159800 |
| N  | 1.25286500  | 0.90024000  | -0.49114200 |
| H  | 3.06641800  | 1.56864700  | 0.18898500  |
| N  | -1.32436800 | 0.86094100  | -0.75072600 |
| C  | 0.60722700  | 2.20988700  | -0.29931000 |
| C  | -2.56351700 | 0.68669000  | -0.43407700 |
| C  | -0.72513800 | 2.16222800  | -1.06120700 |
| C  | 1.41891900  | 3.43569900  | -0.72499500 |
| H  | -3.20965800 | 1.55955800  | -0.33386600 |
| C  | -3.17230100 | -0.59255800 | -0.20857100 |
| C  | -1.56253200 | 3.40777900  | -0.77858500 |
| C  | 0.60058100  | 4.71166200  | -0.47296700 |
| H  | 1.67350100  | 3.34409300  | -1.78889600 |
| H  | 2.35994500  | 3.49169200  | -0.16991600 |
| C  | -4.48227500 | -0.63229100 | 0.32028600  |
| C  | -2.51028600 | -1.80915300 | -0.56989000 |
| C  | -0.76519100 | 4.66270500  | -1.16977700 |
| H  | -2.50161500 | 3.37548600  | -1.34149900 |
| H  | -1.81971100 | 3.44292700  | 0.28806800  |
| H  | 1.16547500  | 5.58650600  | -0.81089400 |
| H  | 0.45207600  | 4.83111400  | 0.60807300  |
| C  | -5.14283100 | -1.82942100 | 0.51368600  |
| H  | -4.96219700 | 0.30659500  | 0.58518500  |
| C  | -3.21802800 | -3.01988300 | -0.37833800 |

|   |             |             |             |
|---|-------------|-------------|-------------|
| O | -1.30745900 | -1.85848800 | -1.09678400 |
| H | -0.61833500 | 4.66693200  | -2.25801100 |
| H | -1.34587600 | 5.55856700  | -0.92793100 |
| C | -4.49616500 | -3.02624400 | 0.15298100  |
| H | -6.14194400 | -1.84815700 | 0.93441800  |
| H | -2.71644900 | -3.94056300 | -0.65699500 |
| H | -5.00582000 | -3.97486500 | 0.29719700  |
| O | -0.05410300 | -0.78405900 | 1.07756500  |
| H | -0.17125600 | -1.73672900 | 1.21381100  |
| O | 0.08442100  | -0.46169000 | -2.85081700 |
| H | -0.68157600 | -1.06141300 | -2.93167100 |
| H | 0.85025300  | -1.06618000 | -2.87301500 |
| C | 0.10399800  | 0.21320100  | 3.60330600  |
| C | -0.78115500 | 0.06229200  | 2.40202200  |
| O | -0.84930400 | 0.94581400  | 4.22210700  |
| H | 0.33529500  | -0.77957100 | 4.05943400  |
| H | -1.67795400 | -0.52490100 | 2.56279100  |
| H | -0.95617000 | 1.00491500  | 1.90302100  |
| C | 1.43512100  | 0.92262800  | 3.31831500  |
| H | 1.93842800  | 1.15280500  | 4.26314900  |
| H | 2.10236100  | 0.30845500  | 2.70118700  |
| H | 1.24147300  | 1.87663800  | 2.81075300  |
| H | -0.48374800 | 2.13027100  | -2.13313200 |
| H | 0.37538500  | 2.29522900  | 0.77099200  |

**PO + H<sub>2</sub>O-Co<sup>III</sup>-OH PO ring-opening in the terminal carbon**

PO + H<sub>2</sub>O-Co<sup>III</sup>-OH = PO-OH-Co<sup>III</sup>-H<sub>2</sub>O

Charge: 0

Spin Multiplicity: 1

Sum of electronic and thermal Free Energies (a.u.): -1524.419943

Thermal correction to Gibbs Free Energy (a.u.): 0.431804

No imaginary frequency

Calculation of single point energy based on the optimized structure, Er = -2763.1287379 a.u.

|    |             |             |             |
|----|-------------|-------------|-------------|
| C  | 5.51936900  | -1.79015500 | 1.00752100  |
| C  | 5.84939800  | -0.42462200 | 1.11914600  |
| C  | 4.25706700  | -2.19199000 | 0.61563200  |
| H  | 6.26854900  | -2.54306700 | 1.23730900  |
| C  | 4.88190500  | 0.51479600  | 0.82924100  |
| H  | 6.84241100  | -0.12057300 | 1.43136200  |
| C  | 3.24212400  | -1.24714600 | 0.30759300  |
| H  | 3.99712600  | -3.24210100 | 0.53321500  |
| C  | 3.57911800  | 0.13967100  | 0.42200800  |
| H  | 5.10885300  | 1.57530900  | 0.91313000  |
| O  | 2.07690500  | -1.69549000 | -0.07806300 |
| C  | 2.63316700  | 1.18397800  | 0.16218400  |
| Co | 0.54063800  | -0.65298500 | -0.47797600 |
| N  | 1.41549600  | 1.02456200  | -0.23575500 |
| H  | 2.99495100  | 2.19831400  | 0.33768400  |
| N  | -0.96275700 | 0.37087700  | -1.03751100 |
| C  | 0.46402500  | 2.14243500  | -0.31289700 |
| C  | -2.18407000 | -0.04099400 | -0.98731700 |
| C  | -0.57786200 | 1.74334300  | -1.37180800 |
| C  | 1.05128600  | 3.52391700  | -0.60832400 |
| H  | -2.98567900 | 0.66561900  | -1.20214300 |
| C  | -2.58695500 | -1.38177300 | -0.67954200 |
| C  | -1.70103600 | 2.77461700  | -1.46424000 |
| C  | -0.07099400 | 4.56649400  | -0.72167800 |
| H  | 1.62337700  | 3.47916700  | -1.54456700 |
| H  | 1.74557300  | 3.82658000  | 0.18173300  |
| C  | -3.96166900 | -1.64378300 | -0.48650400 |
| C  | -1.63893200 | -2.45202200 | -0.62311700 |
| C  | -1.11804300 | 4.16244000  | -1.76550000 |
| H  | -2.41695300 | 2.49250400  | -2.24371000 |
| H  | -2.24566600 | 2.80028300  | -0.51230800 |
| H  | 0.35644500  | 5.54376500  | -0.96905700 |
| H  | -0.55872800 | 4.67490800  | 0.25618000  |
| C  | -4.42039700 | -2.91960000 | -0.22258000 |
| H  | -4.66100700 | -0.81262600 | -0.54109800 |
| C  | -2.13910100 | -3.75198100 | -0.36742100 |
| O  | -0.35590700 | -2.29715300 | -0.83874900 |

|   |             |             |             |
|---|-------------|-------------|-------------|
| H | -0.65512200 | 4.15190600  | -2.76123300 |
| H | -1.92397100 | 4.90274300  | -1.80189900 |
| C | -3.49049200 | -3.97488600 | -0.16918800 |
| H | -5.47636000 | -3.10585600 | -0.06089500 |
| H | -1.42003100 | -4.56320700 | -0.32589500 |
| H | -3.83758700 | -4.98409400 | 0.03555700  |
| O | -0.04277800 | -0.58196700 | 1.24718400  |
| H | 0.33497600  | -1.38610800 | 1.63186600  |
| O | 1.15780500  | -0.92533600 | -2.46728400 |
| H | 0.52495700  | -1.66703300 | -2.53873300 |
| H | 1.98720900  | -1.36753900 | -2.21460600 |
| C | -2.64214800 | 0.86294000  | 2.43594800  |
| C | -3.57008600 | 1.73791500  | 1.70161600  |
| O | -3.96041000 | 1.15090700  | 2.94247800  |
| H | -2.50896800 | -0.15334800 | 2.06844300  |
| H | -4.10015400 | 1.36786900  | 0.82283800  |
| H | -3.41796000 | 2.81944400  | 1.71966400  |
| C | -1.48495700 | 1.40926900  | 3.22913100  |
| H | -1.42071500 | 0.89645000  | 4.19507700  |
| H | -0.55628600 | 1.20896300  | 2.68821800  |
| H | -1.60229900 | 2.48065000  | 3.42217000  |
| H | -0.05555300 | 1.69299200  | -2.33805700 |
| H | -0.05700900 | 2.16575000  | 0.65402900  |

**PO + H<sub>2</sub>O-Co<sup>III</sup>-OH PO ring-opening in the terminal carbon**

PO + H<sub>2</sub>O-Co<sup>III</sup>-OH = PO-OH-Co<sup>III</sup>-H<sub>2</sub>O

Charge: 0

Spin Multiplicity: 1

Sum of electronic and thermal Free Energies (a.u.): -1524.371697

Thermal correction to Gibbs Free Energy (a.u.): 0.435079

No imaginary frequency

Calculation of single point energy based on the optimized structure, Ep = -2763.1072112 a.u.

|    |             |             |             |
|----|-------------|-------------|-------------|
| C  | 4.72288500  | -2.85020900 | -0.24830200 |
| C  | 5.34122900  | -1.64692900 | 0.14360800  |
| C  | 3.38546700  | -2.88813700 | -0.59643300 |
| H  | 5.30342800  | -3.76830700 | -0.27229900 |
| C  | 4.58652400  | -0.49285600 | 0.17034400  |
| H  | 6.38913100  | -1.63047800 | 0.42156100  |
| C  | 2.58455300  | -1.71889000 | -0.56819000 |
| H  | 2.90355500  | -3.81443800 | -0.89091200 |
| C  | 3.21525700  | -0.49459300 | -0.18241000 |
| H  | 5.03915000  | 0.44895900  | 0.47083200  |
| O  | 1.32227500  | -1.82513300 | -0.90765100 |
| C  | 2.51341300  | 0.75255900  | -0.13525300 |
| Co | 0.00931300  | -0.46714700 | -0.75891700 |
| N  | 1.26959300  | 0.93993800  | -0.43496000 |
| H  | 3.10208600  | 1.61045700  | 0.19270200  |
| N  | -1.30518200 | 0.91056000  | -0.74196700 |
| C  | 0.61653400  | 2.23910700  | -0.19785500 |
| C  | -2.56139700 | 0.73726400  | -0.49488800 |
| C  | -0.69413200 | 2.21983900  | -0.99828600 |
| C  | 1.43621100  | 3.48571000  | -0.53966700 |
| H  | -3.20731300 | 1.61199500  | -0.41383400 |
| C  | -3.19087000 | -0.53900300 | -0.31760100 |
| C  | -1.54032100 | 3.45662500  | -0.70227500 |
| C  | 0.60467500  | 4.74858700  | -0.26730100 |
| H  | 1.73229200  | 3.44007300  | -1.59584300 |
| H  | 2.35428400  | 3.52275400  | 0.05393400  |
| C  | -4.53060200 | -0.57123400 | 0.13331400  |
| C  | -2.51692900 | -1.75964100 | -0.64152800 |
| C  | -0.73206000 | 4.72494700  | -1.01836600 |
| H  | -2.45853600 | 3.44565800  | -1.29922000 |
| H  | -1.83603600 | 3.45327500  | 0.35500400  |
| H  | 1.18012200  | 5.63700000  | -0.54684200 |
| H  | 0.41373000  | 4.82379200  | 0.81107000  |
| C  | -5.20867700 | -1.76375300 | 0.28613200  |
| H  | -5.01932000 | 0.37044100  | 0.37085500  |
| C  | -3.24173200 | -2.96641400 | -0.49028800 |
| O  | -1.28636700 | -1.81647100 | -1.09738400 |
| H  | -0.54300500 | 4.76831900  | -2.09920100 |

|   |             |             |             |
|---|-------------|-------------|-------------|
| H | -1.32375000 | 5.61102100  | -0.76735500 |
| C | -4.54847600 | -2.96489900 | -0.03507100 |
| H | -6.23104800 | -1.77658400 | 0.64682900  |
| H | -2.73037400 | -3.89018400 | -0.73936500 |
| H | -5.07135600 | -3.91035500 | 0.07920100  |
| O | -0.02991100 | -0.78729200 | 1.16156500  |
| H | -0.00099600 | -1.75021800 | 1.27048900  |
| O | 0.13450000  | -0.43144200 | -2.85006600 |
| H | -0.62864200 | -1.03696200 | -2.91642600 |
| H | 0.90038800  | -1.03385800 | -2.86303200 |
| C | -0.06408200 | -0.10339500 | 3.62526100  |
| C | -0.81683000 | -0.17525400 | 2.25701500  |
| O | -0.93580700 | 0.52492900  | 4.40036500  |
| H | 0.18009200  | -1.16801800 | 3.91008000  |
| H | -1.76282800 | -0.70859800 | 2.36155800  |
| H | -1.00066100 | 0.84694600  | 1.93622300  |
| C | 1.28863200  | 0.62150600  | 3.42278400  |
| H | 1.79516000  | 0.71204100  | 4.38842300  |
| H | 1.94912000  | 0.09232900  | 2.72326300  |
| H | 1.10316800  | 1.63914000  | 3.05258800  |
| H | -0.42166100 | 2.21989800  | -2.06340400 |
| H | 0.35435100  | 2.27102700  | 0.86928100  |

**subsequent hydration**

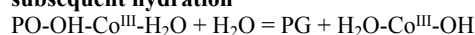

Charge: 0

Spin Multiplicity: 1

Sum of electronic and thermal Free Energies (a.u.): -1600.781865

Thermal correction to Gibbs Free Energy (a.u.): 0.461524

Imaginary frequencies: -506.04

Calculation of single point energy based on the optimized structure, Et = -2839.5668362 a.u.

|    |             |             |             |
|----|-------------|-------------|-------------|
| C  | 4.98746600  | -2.54258900 | 0.40999100  |
| C  | 5.46185800  | -1.24826100 | 0.69709200  |
| C  | 3.71121000  | -2.74615200 | -0.08314400 |
| H  | 5.63143300  | -3.40008900 | 0.58454200  |
| C  | 4.62919300  | -0.17147100 | 0.47130300  |
| H  | 6.46200300  | -1.10235200 | 1.08959900  |
| C  | 2.83350900  | -1.65945000 | -0.31387100 |
| H  | 3.34023300  | -3.74220800 | -0.29963900 |
| C  | 3.31747100  | -0.34477900 | -0.03037700 |
| H  | 4.97097100  | 0.83850100  | 0.68397200  |
| O  | 1.64362800  | -1.91234800 | -0.80443300 |
| C  | 2.52498500  | 0.82558200  | -0.25407000 |
| Co | 0.18617100  | -0.70032400 | -0.77692000 |
| N  | 1.29742600  | 0.85371000  | -0.65948500 |
| H  | 3.01742600  | 1.77750800  | -0.04748600 |
| N  | -1.25846500 | 0.53070100  | -0.98877200 |
| C  | 0.54483200  | 2.12267100  | -0.69050000 |
| C  | -2.49806600 | 0.26804300  | -0.75020500 |
| C  | -0.78619400 | 1.86017600  | -1.40885900 |
| C  | 1.23499100  | 3.33375100  | -1.32099800 |
| H  | -3.22127500 | 1.08058000  | -0.79307300 |
| C  | -3.00664100 | -1.03105300 | -0.40896900 |
| C  | -1.73525000 | 3.03634300  | -1.17052700 |
| C  | 0.32286600  | 4.55887200  | -1.13525700 |
| H  | 1.42178300  | 3.13911400  | -2.38507100 |
| H  | 2.20411800  | 3.52490400  | -0.85000500 |
| C  | -4.34925400 | -1.13694800 | 0.01758400  |
| C  | -2.20553600 | -2.20740900 | -0.53835300 |
| C  | -1.08300500 | 4.32374900  | -1.70543000 |
| H  | -2.68269400 | 2.87977700  | -1.69844200 |
| H  | -1.94982000 | 3.09682600  | -0.09173200 |
| H  | 0.77827500  | 5.43594200  | -1.60696100 |
| H  | 0.24534800  | 4.77803600  | -0.06310100 |
| C  | -4.90986400 | -2.36097500 | 0.32853400  |
| H  | -4.93666500 | -0.22651900 | 0.10601400  |
| C  | -2.80700700 | -3.44910000 | -0.22753500 |
| O  | -0.95690700 | -2.20046500 | -0.95884800 |
| H  | -1.01912600 | 4.26291600  | -2.80074000 |
| H  | -1.72511200 | 5.18015000  | -1.47639300 |

|   |             |             |             |
|---|-------------|-------------|-------------|
| C | -4.12360000 | -3.51965000 | 0.19687400  |
| H | -5.93772800 | -2.42814100 | 0.66706600  |
| H | -2.19696200 | -4.34022700 | -0.33046300 |
| H | -4.55236400 | -4.48879300 | 0.43595300  |
| O | 0.12122200  | -0.78046000 | 1.10021600  |
| H | -0.19158000 | -1.67299500 | 1.31372600  |
| O | 0.36116400  | -0.86554900 | -2.79540100 |
| H | -0.33679500 | -1.54476100 | -2.86481200 |
| H | 1.18540700  | -1.38711200 | -2.73174100 |
| C | -0.17863900 | 0.60625100  | 3.27437100  |
| C | -0.89237800 | 0.46571600  | 1.93393700  |
| O | -1.03820400 | 1.19642100  | 4.20847800  |
| H | 0.06688600  | -0.40920200 | 3.62234000  |
| H | -1.83361600 | -0.06317000 | 1.91193100  |
| H | -0.71421000 | 1.16302300  | 1.15619400  |
| C | 1.12606500  | 1.39558500  | 3.11036500  |
| H | 1.61141200  | 1.50649900  | 4.08360300  |
| H | 1.81649600  | 0.89184000  | 2.42565900  |
| H | 0.89817600  | 2.39874100  | 2.73217200  |
| O | -2.07677300 | 2.29092300  | 2.20242700  |
| H | -1.56002500 | 1.83691100  | 3.60642600  |
| H | -2.99286000 | 1.97824700  | 2.23640000  |
| H | 0.31838300  | 2.38474300  | 0.34928100  |
| H | -0.56396200 | 1.76758900  | -2.48180900 |

**subsequent hydration**

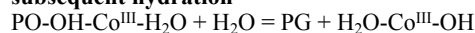

Charge: 0

Spin Multiplicity: 1

Sum of electronic and thermal Free Energies (a.u.): -1600.815536

Thermal correction to Gibbs Free Energy (a.u.): 0.460915

No imaginary frequency

Calculation of single point energy based on the optimized structure, Er = -2839.6016454 a.u.

|    |             |             |             |
|----|-------------|-------------|-------------|
| C  | 4.85887700  | -2.74228700 | 0.17709800  |
| C  | 5.39521600  | -1.46659200 | 0.42855400  |
| C  | 3.54360200  | -2.89922300 | -0.22526200 |
| H  | 5.48270800  | -3.62237200 | 0.30604300  |
| C  | 4.58508400  | -0.36089700 | 0.26083600  |
| H  | 6.42448800  | -1.35457400 | 0.75059400  |
| C  | 2.69266600  | -1.78218200 | -0.39473300 |
| H  | 3.12357500  | -3.88132400 | -0.41496600 |
| C  | 3.23800600  | -0.48677500 | -0.14951200 |
| H  | 4.97456200  | 0.63601800  | 0.45089700  |
| O  | 1.45595000  | -1.99858400 | -0.79190000 |
| C  | 2.47083100  | 0.71547400  | -0.30875200 |
| Co | 0.06138600  | -0.72150300 | -0.76525500 |
| N  | 1.22585300  | 0.79109600  | -0.64095600 |
| H  | 3.00595600  | 1.64572300  | -0.11551600 |
| N  | -1.33668600 | 0.56256600  | -0.92574900 |
| C  | 0.50215600  | 2.07827400  | -0.62361700 |
| C  | -2.57313000 | 0.35120300  | -0.62672100 |
| C  | -0.81290500 | 1.86026500  | -1.38149000 |
| C  | 1.24792700  | 3.28381400  | -1.19889800 |
| H  | -3.26553600 | 1.19212800  | -0.64938500 |
| C  | -3.11627400 | -0.92578300 | -0.25467700 |
| C  | -1.72740500 | 3.07311300  | -1.21468000 |
| C  | 0.35148700  | 4.52673400  | -1.07514400 |
| H  | 1.51092100  | 3.09260100  | -2.24857800 |
| H  | 2.18157600  | 3.45937500  | -0.65534500 |
| C  | -4.43751800 | -0.97785400 | 0.24151500  |
| C  | -2.37296900 | -2.13347400 | -0.43008400 |
| C  | -1.00730000 | 4.31943600  | -1.75613000 |
| H  | -2.66711100 | 2.92824800  | -1.75992400 |
| H  | -1.94324900 | 3.20490200  | -0.14700300 |
| H  | 0.86176900  | 5.39740700  | -1.50056900 |
| H  | 0.18699500  | 4.72556600  | -0.01055500 |
| C  | -5.03100800 | -2.17960600 | 0.57778500  |
| H  | -4.98038800 | -0.04449800 | 0.36601700  |
| C  | -3.00797600 | -3.35076800 | -0.09371300 |
| O  | -1.14690800 | -2.17490000 | -0.91451900 |

|   |             |             |             |
|---|-------------|-------------|-------------|
| H | -0.86209700 | 4.21625900  | -2.84065600 |
| H | -1.64037800 | 5.20001400  | -1.60610200 |
| C | -4.30231900 | -3.36896900 | 0.40001300  |
| H | -6.04109000 | -2.20587500 | 0.97094500  |
| H | -2.44293500 | -4.26625600 | -0.23362400 |
| H | -4.75811100 | -4.32090700 | 0.65748000  |
| O | 0.05278500  | -0.82892200 | 1.15141900  |
| H | -0.05015600 | -1.76359100 | 1.38411500  |
| O | 0.18597500  | -0.89785300 | -2.77257800 |
| H | -0.54778900 | -1.54060900 | -2.82802700 |
| H | 0.98398100  | -1.46115900 | -2.73345400 |
| C | 0.02546700  | 0.52358600  | 3.34235700  |
| C | -0.72070300 | 0.05261400  | 2.07335200  |
| O | -0.79831400 | 1.48828100  | 3.83619200  |
| H | 0.12502400  | -0.34946900 | 4.02756100  |
| H | -1.65464500 | -0.45188200 | 2.32643500  |
| H | -0.93275700 | 0.93234000  | 1.48163900  |
| C | 1.45296400  | 1.00826100  | 3.01793200  |
| H | 1.92882000  | 1.34067300  | 3.94567800  |
| H | 2.07430100  | 0.22687700  | 2.56396200  |
| H | 1.40040400  | 1.87138300  | 2.34606000  |
| O | -0.88553900 | 3.15864000  | 1.98254500  |
| H | -0.87994200 | 2.48415800  | 2.82480300  |
| H | -0.58491200 | 3.99793700  | 2.35069200  |
| H | 0.23706300  | 2.31180200  | 0.42005900  |
| H | -0.57288000 | 1.72056500  | -2.44590800 |

**subsequent hydration**

PO-OH-Co<sup>III</sup>-H<sub>2</sub>O + H<sub>2</sub>O = PG + H<sub>2</sub>O-Co<sup>III</sup>-OH

Charge: 0

Spin Multiplicity: 1

Sum of electronic and thermal Free Energies (a.u.): -1600.869509

Thermal correction to Gibbs Free Energy (a.u.): 0.461115

No imaginary frequency

Calculation of single point energy based on the optimized structure, Ep = -2839.6394141 a.u.

|    |             |             |             |
|----|-------------|-------------|-------------|
| C  | 5.17079000  | -2.22989300 | 0.88929800  |
| C  | 5.58006700  | -0.88516600 | 0.80275600  |
| C  | 3.88579400  | -2.60976800 | 0.54979600  |
| H  | 5.87414600  | -2.98369400 | 1.23303800  |
| C  | 4.66972900  | 0.05611400  | 0.36604800  |
| H  | 6.58947300  | -0.59649700 | 1.07474600  |
| C  | 2.92812700  | -1.66241500 | 0.10297200  |
| H  | 3.56453900  | -3.64378500 | 0.61924900  |
| C  | 3.34696300  | -0.29721700 | 0.01132100  |
| H  | 4.96057300  | 1.10148600  | 0.28937900  |
| O  | 1.73578500  | -2.09113600 | -0.22127000 |
| C  | 2.47235300  | 0.74923600  | -0.43357400 |
| Co | 0.22462000  | -0.99523700 | -0.58391300 |
| N  | 1.23661300  | 0.61420400  | -0.77776500 |
| H  | 2.91250600  | 1.74763900  | -0.46265300 |
| N  | -1.26552600 | 0.05217300  | -1.12599600 |
| C  | 0.37942400  | 1.77969200  | -1.05538600 |
| C  | -2.48627600 | -0.18879900 | -0.79047100 |
| C  | -0.82990300 | 1.25284200  | -1.84261900 |
| C  | 1.03642700  | 2.95042600  | -1.78869400 |
| H  | -3.25070500 | 0.55512200  | -1.01728100 |
| C  | -2.93053200 | -1.39515900 | -0.15126100 |
| C  | -1.87235500 | 2.34779300  | -2.06088600 |
| C  | -0.00086800 | 4.05894300  | -2.02652200 |
| H  | 1.44887000  | 2.59802800  | -2.74376800 |
| H  | 1.87010900  | 3.35620000  | -1.20648900 |
| C  | -4.26411500 | -1.46438000 | 0.30524900  |
| C  | -2.07886300 | -2.54070900 | -0.04925100 |
| C  | -1.22517400 | 3.53613600  | -2.78794900 |
| H  | -2.71017800 | 1.96128100  | -2.65247800 |
| H  | -2.25685700 | 2.67355600  | -1.08818800 |
| H  | 0.46141100  | 4.88880500  | -2.57191900 |
| H  | -0.32475600 | 4.45150900  | -1.05478900 |
| C  | -4.77355500 | -2.61839500 | 0.87039500  |
| H  | -4.89024400 | -0.58039400 | 0.20759800  |

|   |             |             |             |
|---|-------------|-------------|-------------|
| C | -2.63181500 | -3.71485900 | 0.51716100  |
| O | -0.84204000 | -2.57107600 | -0.48570300 |
| H | -0.92070500 | 3.22610100  | -3.79703800 |
| H | -1.96152800 | 4.33687100  | -2.91449500 |
| C | -3.94072800 | -3.74815300 | 0.96686100  |
| H | -5.79701400 | -2.65527400 | 1.22751700  |
| H | -1.98645600 | -4.58388000 | 0.59112100  |
| H | -4.32853300 | -4.66414400 | 1.40467300  |
| O | -0.05672200 | -0.58232400 | 1.17389100  |
| H | 0.13675500  | -1.41913800 | 1.62046000  |
| O | 0.52904000  | -1.67443000 | -2.53824900 |
| H | -0.15904800 | -2.35522200 | -2.40825000 |
| H | 1.35037700  | -2.13467800 | -2.28488000 |
| C | -0.57998800 | 2.23628200  | 3.24112300  |
| C | -1.66449100 | 1.97297400  | 2.20098100  |
| O | -0.86089200 | 3.55934600  | 3.73535900  |
| H | -0.70049900 | 1.49966900  | 4.05055000  |
| H | -2.64360500 | 1.94722600  | 2.70150500  |
| H | -1.47268000 | 1.01381600  | 1.71516100  |
| C | 0.83181600  | 2.13380600  | 2.67339800  |
| H | 1.58205900  | 2.30201100  | 3.45598900  |
| H | 0.97798200  | 1.13981500  | 2.23892500  |
| H | 0.97564300  | 2.88760900  | 1.89241900  |
| O | -1.65259100 | 2.99566900  | 1.20006700  |
| H | -0.07806800 | 3.87417900  | 4.20335000  |
| H | -1.57637800 | 3.82249700  | 1.70159400  |
| H | -0.00549500 | 2.13370700  | -0.09263100 |
| H | -0.46163700 | 0.90195800  | -2.81766100 |

PO + H<sub>2</sub>O-Co<sup>III</sup>-OH PO ring-opening in the middle carbon and subsequent hydration

**PO + H<sub>2</sub>O-Co<sup>III</sup>-OH PO ring-opening in the middle carbon**

PO + H<sub>2</sub>O-Co<sup>III</sup>-OH = PO-OH-Co<sup>III</sup>-H<sub>2</sub>O

Charge: 0

Spin Multiplicity: 1

Sum of electronic and thermal Free Energies (a.u.): -1524.366163

Thermal correction to Gibbs Free Energy (a.u.): 0.436482

Imaginary frequencies: -359.17

Calculation of single point energy based on the optimized structure, Et = -2763.0858754 a.u.

|    |             |             |             |
|----|-------------|-------------|-------------|
| C  | 4.78214000  | -2.96192800 | 0.27186700  |
| C  | 5.43404300  | -1.71680100 | 0.35620800  |
| C  | 3.42042400  | -3.04335500 | 0.04496600  |
| H  | 5.35587800  | -3.87713900 | 0.38931500  |
| C  | 4.68651200  | -0.56599700 | 0.20937000  |
| C  | 2.63093600  | -1.87625900 | -0.11215800 |
| C  | 3.29169400  | -0.61261500 | -0.02390900 |
| H  | 5.16434800  | 0.40837900  | 0.27692400  |
| O  | 1.34829400  | -2.02511000 | -0.34753700 |
| C  | 2.59048400  | 0.63289800  | -0.14488400 |
| Co | 0.06253900  | -0.64993800 | -0.52316200 |
| N  | 1.32143000  | 0.78346700  | -0.33001800 |
| H  | 3.20480700  | 1.52782100  | -0.04629300 |
| N  | -1.22036700 | 0.72873100  | -0.82347000 |
| C  | 0.68888800  | 2.11662100  | -0.31538700 |
| C  | -2.49213600 | 0.57984500  | -0.65332500 |
| C  | -0.58190300 | 2.00794900  | -1.17314400 |
| C  | 1.54129400  | 3.29949500  | -0.77643500 |
| H  | -3.13446800 | 1.45818800  | -0.72290800 |
| C  | -3.13983600 | -0.66823400 | -0.37129200 |
| C  | -1.43289600 | 3.26792000  | -1.01474800 |
| C  | 0.70817700  | 4.58265900  | -0.62596000 |
| H  | 1.86496800  | 3.15595600  | -1.81684100 |
| H  | 2.43935000  | 3.39103900  | -0.15845700 |
| C  | -4.50042300 | -0.65359000 | 0.00907700  |
| C  | -2.45589100 | -1.91371600 | -0.53412900 |
| C  | -0.60585500 | 4.50163800  | -1.41208100 |
| H  | -2.33229200 | 3.21222800  | -1.63790100 |
| H  | -1.74915900 | 3.35482200  | 0.03240000  |
| H  | 1.29260400  | 5.44793800  | -0.95591000 |
| H  | 0.48876900  | 4.72215500  | 0.43963300  |



|   |             |             |             |
|---|-------------|-------------|-------------|
| C | -5.18944900 | -1.82651100 | 0.24955900  |
| H | -4.99828400 | 0.30691400  | 0.11868800  |
| C | -3.18982900 | -3.09955000 | -0.29886700 |
| O | -1.21009200 | -2.00525600 | -0.93687300 |
| H | -0.38776300 | 4.45589400  | -2.48793000 |
| H | -1.20041400 | 5.40664900  | -1.25025500 |
| C | -4.51853100 | -3.05310200 | 0.08635900  |
| H | -5.05066100 | -3.98246500 | 0.26996400  |
| O | -0.37467700 | -0.77477900 | 1.28958200  |
| H | 0.32703600  | -1.30464000 | 1.69526400  |
| O | 0.40317500  | -0.81173500 | -2.53768600 |
| H | -0.36989900 | -1.40796000 | -2.62132000 |
| H | 1.15773400  | -1.42363200 | -2.48112800 |
| C | -0.68862800 | 0.78141200  | 2.31347500  |
| C | 0.54187300  | 1.41429400  | 2.87388600  |
| O | -0.02740800 | 2.65521400  | 2.86138600  |
| H | -1.04382800 | 1.27061100  | 1.42863600  |
| H | 1.45287400  | 1.25620200  | 2.25463900  |
| H | 0.77793200  | 0.99737000  | 3.87903900  |
| C | -1.75017100 | 0.30018500  | 3.25813100  |
| H | -1.36954000 | -0.49831700 | 3.90362300  |
| H | -2.03565900 | 1.14499700  | 3.89078000  |
| H | -2.62753100 | -0.06506300 | 2.72046700  |
| H | 0.39171800  | 2.34187800  | 0.72120500  |
| H | -0.26978500 | 1.90789800  | -2.22281700 |
| H | -6.22984200 | -1.80427900 | 0.55461400  |
| H | -2.66882700 | -4.04261200 | -0.42361000 |
| H | 2.91235300  | -3.99978300 | -0.01840800 |
| H | 6.50174800  | -1.66429600 | 0.53794500  |

**PO + H<sub>2</sub>O-Co<sup>III</sup>-OH PO ring-opening in the middle carbon**

PO + H<sub>2</sub>O-Co<sup>III</sup>-OH = PO-OH-Co<sup>III</sup>-H<sub>2</sub>O

Charge: 0

Spin Multiplicity: 1

Sum of electronic and thermal Free Energies (a.u.): -1524.427133

Thermal correction to Gibbs Free Energy (a.u.): 0.433827

No imaginary frequency

Calculation of single point energy based on the optimized structure, Er = -2763.1299989 a.u.

|    |             |             |             |
|----|-------------|-------------|-------------|
| C  | 5.43508800  | -2.02812800 | 0.92181300  |
| C  | 5.82170700  | -0.68016100 | 1.05335400  |
| C  | 4.15180400  | -2.37026100 | 0.53952400  |
| H  | 6.15548000  | -2.81538000 | 1.12762300  |
| C  | 4.88879900  | 0.30318300  | 0.79325100  |
| C  | 3.17312300  | -1.37950200 | 0.26197900  |
| C  | 3.56743600  | -0.01062300 | 0.39771300  |
| H  | 5.15991900  | 1.35193800  | 0.89291700  |
| O  | 1.98572400  | -1.77289000 | -0.11975800 |
| C  | 2.66036300  | 1.07782800  | 0.17092500  |
| Co | 0.48739000  | -0.65702900 | -0.47020800 |
| N  | 1.43140400  | 0.97618700  | -0.20543500 |
| H  | 3.06629300  | 2.07335200  | 0.35720400  |
| N  | -0.97480600 | 0.44091500  | -1.00445200 |
| C  | 0.52075000  | 2.13119900  | -0.24817500 |
| C  | -2.21326000 | 0.09209800  | -0.94547700 |
| C  | -0.52815100 | 1.80040700  | -1.32257100 |
| C  | 1.16218400  | 3.49670600  | -0.49494900 |
| H  | -2.98017700 | 0.84480500  | -1.12805800 |
| C  | -2.67745200 | -1.23577500 | -0.65689400 |
| C  | -1.60660500 | 2.87867500  | -1.41110100 |
| C  | 0.07884200  | 4.58106400  | -0.59340900 |
| H  | 1.74731400  | 3.46085500  | -1.42411300 |
| H  | 1.85466300  | 3.75012300  | 0.31449800  |
| C  | -4.06207300 | -1.43631100 | -0.46759600 |
| C  | -1.78073400 | -2.34976400 | -0.61589000 |
| C  | -0.95802100 | 4.24567100  | -1.67129400 |
| H  | -2.31298400 | 2.64251700  | -2.21519000 |
| H  | -2.15982600 | 2.90400400  | -0.46639300 |
| H  | 0.54509700  | 5.55046200  | -0.79973800 |
| H  | -0.42714500 | 4.66958800  | 0.37631500  |
| C  | -4.58138800 | -2.69225300 | -0.21592400 |

|   |             |             |             |
|---|-------------|-------------|-------------|
| H | -4.72091100 | -0.57250800 | -0.52097800 |
| C | -2.34162800 | -3.62735200 | -0.37010300 |
| O | -0.49215500 | -2.25511200 | -0.83415500 |
| H | -0.47151100 | 4.24098500  | -2.65639300 |
| H | -1.73161100 | 5.01998000  | -1.70667900 |
| C | -3.70187900 | -3.78980400 | -0.17193700 |
| H | -4.09509300 | -4.78409800 | 0.02259000  |
| O | -0.04876900 | -0.59745500 | 1.27435100  |
| H | 0.24170100  | -1.45945600 | 1.60610400  |
| O | 1.06518000  | -0.92548400 | -2.46801400 |
| H | 0.39460700  | -1.63115600 | -2.55218700 |
| H | 1.87018000  | -1.41560100 | -2.22265800 |
| C | -2.54580300 | 0.81004700  | 2.34262200  |
| C | -1.62877000 | 1.71534300  | 3.04292300  |
| O | -2.14795500 | 2.07142400  | 1.74792700  |
| H | -2.07492500 | -0.04570400 | 1.86213000  |
| H | -0.56985700 | 1.46365800  | 3.05745600  |
| H | -1.99348200 | 2.33080000  | 3.86575200  |
| C | -3.99869200 | 0.69560200  | 2.71556700  |
| H | -4.14600500 | -0.13170300 | 3.41844300  |
| H | -4.36111200 | 1.61911000  | 3.17697400  |
| H | -4.60866000 | 0.48601900  | 1.83073600  |
| H | -0.01734200 | 2.13649100  | 0.70737100  |
| H | -0.00180700 | 1.73178900  | -2.28583900 |
| H | -5.64586200 | -2.83110800 | -0.06123300 |
| H | -1.66113600 | -4.47176500 | -0.33878200 |
| H | 3.84818400  | -3.40724900 | 0.44090700  |
| H | 6.83025900  | -0.42187600 | 1.35711800  |

**PO + H<sub>2</sub>O-Co<sup>III</sup>-OH PO ring-opening in the middle carbon**

PO + H<sub>2</sub>O-Co<sup>III</sup>-OH = PO-OH-Co<sup>III</sup>-H<sub>2</sub>O

Charge: 0

Spin Multiplicity: 1

Sum of electronic and thermal Free Energies (a.u.): -1524.396433

Thermal correction to Gibbs Free Energy (a.u.): 0.438753

No imaginary frequency

Calculation of single point energy based on the optimized structure, Ep = -2763.1109192 a.u.

|    |             |             |             |
|----|-------------|-------------|-------------|
| C  | 5.00910800  | -2.69269600 | 0.10309400  |
| C  | 5.63347400  | -1.46863400 | -0.18716200 |
| C  | 3.63687900  | -2.76626200 | 0.28666800  |
| H  | 5.60567900  | -3.59699600 | 0.18398200  |
| C  | 4.85636000  | -0.32722400 | -0.27971800 |
| C  | 2.82128700  | -1.61476900 | 0.19149700  |
| C  | 3.45644100  | -0.36920500 | -0.10487900 |
| H  | 5.32050400  | 0.63329300  | -0.49019300 |
| O  | 1.52183700  | -1.74859600 | 0.38716800  |
| C  | 2.71478700  | 0.86911200  | -0.16343700 |
| Co | 0.24383500  | -0.51895300 | -0.26860200 |
| N  | 1.42765200  | 0.95976800  | -0.17785200 |
| H  | 3.29773900  | 1.78981800  | -0.18654300 |
| N  | -1.03726300 | 0.73758300  | -0.91699000 |
| C  | 0.66819000  | 2.18272600  | -0.07835400 |
| C  | -2.29129300 | 0.49802400  | -1.08669700 |
| C  | -0.44888100 | 2.07965800  | -1.12673500 |
| C  | 1.43239300  | 3.49401400  | -0.15920200 |
| H  | -2.93462900 | 1.32369900  | -1.38802600 |
| C  | -2.94576300 | -0.76678000 | -0.88056700 |
| C  | -1.42802700 | 3.24688200  | -0.98612800 |
| C  | 0.43185800  | 4.64636500  | 0.02023500  |
| H  | 1.96127100  | 3.58975500  | -1.12200900 |
| H  | 2.18815700  | 3.53380000  | 0.63404200  |
| C  | -4.35387800 | -0.80987900 | -0.98642000 |
| C  | -2.22267800 | -1.95813500 | -0.57137500 |
| C  | -0.67112300 | 4.58269800  | -1.04297800 |
| H  | -2.18131500 | 3.22194400  | -1.78276200 |
| H  | -1.91049100 | 3.13176000  | -0.00744400 |
| H  | 0.95322400  | 5.60878600  | -0.02768700 |
| H  | -0.02323300 | 4.54774700  | 1.01211500  |
| C  | -5.05691100 | -1.98289400 | -0.78817800 |
| H  | -4.88175300 | 0.11109200  | -1.22101000 |

|   |             |             |             |
|---|-------------|-------------|-------------|
| C | -2.96399000 | -3.14666100 | -0.37271000 |
| O | -0.91104600 | -2.01629000 | -0.48073800 |
| H | -0.22930000 | 4.71938300  | -2.04114500 |
| H | -1.38194400 | 5.40369100  | -0.90013600 |
| C | -4.34438400 | -3.15551700 | -0.48025200 |
| H | -4.88347100 | -4.08492600 | -0.31886600 |
| O | -0.15944200 | -0.24664300 | 1.58494700  |
| H | 0.27884500  | -1.02367000 | 1.96976900  |
| O | 0.77246400  | -1.00090100 | -2.13383900 |
| H | 0.22822400  | -1.81595000 | -2.11269600 |
| H | 1.69735700  | -1.29422600 | -2.08386900 |
| C | -1.45986000 | 0.02549600  | 2.24678400  |
| C | -1.34977700 | 1.43919500  | 2.85097800  |
| O | -1.16344600 | 2.40187800  | 1.92303400  |
| H | -2.19893500 | 0.04829900  | 1.44746700  |
| H | -0.54770500 | 1.36568400  | 3.63179900  |
| H | -2.29799900 | 1.55553300  | 3.43678500  |
| C | -1.74927300 | -1.11132200 | 3.20972200  |
| H | -0.99570000 | -1.15324500 | 4.00554300  |
| H | -2.72167800 | -0.95144500 | 3.68334100  |
| H | -1.78026400 | -2.07628200 | 2.69280900  |
| H | 0.08385000  | 2.16348100  | 0.91760800  |
| H | -0.00256800 | 2.06905200  | -2.13425800 |
| H | -6.13831600 | -1.99923500 | -0.86664600 |
| H | -2.40888300 | -4.04751100 | -0.13343900 |
| H | 3.14705200  | -3.70656100 | 0.51749400  |
| H | 6.70743800  | -1.41720600 | -0.32955700 |

**subsequent hydration**

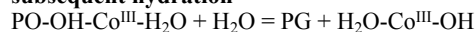

Charge: 0

Spin Multiplicity: 1

Sum of electronic and thermal Free Energies (a.u.): -1600.784884

Thermal correction to Gibbs Free Energy (a.u.): 0.461408

Imaginary frequencies: -468.74

Calculation of single point energy based on the optimized structure, Et = -2839.563534 a.u.

|    |             |             |             |
|----|-------------|-------------|-------------|
| C  | 4.86163200  | -2.85248200 | 0.38694700  |
| C  | 5.46033800  | -1.57931600 | 0.44161400  |
| C  | 3.51756700  | -3.00020600 | 0.09660300  |
| H  | 5.46284300  | -3.73677600 | 0.57944500  |
| C  | 4.67911300  | -0.46828900 | 0.19757100  |
| C  | 2.69332500  | -1.87510300 | -0.15535600 |
| C  | 3.30076500  | -0.58317900 | -0.10131400 |
| H  | 5.11596900  | 0.52653500  | 0.23748000  |
| O  | 1.42925500  | -2.08593000 | -0.44138900 |
| C  | 2.56339100  | 0.62435900  | -0.33591500 |
| Co | 0.08409700  | -0.77013000 | -0.64240400 |
| N  | 1.29891600  | 0.71561400  | -0.58302700 |
| H  | 3.14336000  | 1.54637100  | -0.28231000 |
| N  | -1.25633000 | 0.54393300  | -0.97113500 |
| C  | 0.62828400  | 2.02864100  | -0.67536100 |
| C  | -2.51336600 | 0.36556800  | -0.73407700 |
| C  | -0.68418200 | 1.81532200  | -1.44631300 |
| C  | 1.41509200  | 3.18821400  | -1.28769000 |
| H  | -3.18602300 | 1.21804800  | -0.82833000 |
| C  | -3.10426400 | -0.88395500 | -0.35116000 |
| C  | -1.56353600 | 3.05881900  | -1.30779000 |
| C  | 0.55147800  | 4.45741600  | -1.17926600 |
| H  | 1.66835300  | 2.96691200  | -2.33364900 |
| H  | 2.35343600  | 3.35126200  | -0.74882100 |
| C  | -4.44800200 | -0.89165400 | 0.08371100  |
| C  | -2.38427600 | -2.11348600 | -0.47049100 |
| C  | -0.80875000 | 4.27695900  | -1.86473900 |
| H  | -2.50786400 | 2.93390000  | -1.84927100 |
| H  | -1.77143600 | 3.21010000  | -0.23994500 |
| H  | 1.08590700  | 5.30981100  | -1.61177200 |
| H  | 0.38515400  | 4.66983100  | -0.11637800 |
| C  | -5.08529100 | -2.07019500 | 0.42076300  |
| H  | -4.97493300 | 0.05678600  | 0.15656800  |
| C  | -3.06494900 | -3.30658900 | -0.13499400 |

|   |             |             |             |
|---|-------------|-------------|-------------|
| O | -1.15296000 | -2.18853300 | -0.92145300 |
| H | -0.66398000 | 4.15379000  | -2.94725000 |
| H | -1.41876500 | 5.17602700  | -1.72901500 |
| C | -4.37838700 | -3.28126100 | 0.30222400  |
| H | -4.86937400 | -4.21515000 | 0.56172900  |
| O | -0.28244000 | -0.80543900 | 1.19194400  |
| H | 0.40649700  | -1.35356200 | 1.59677300  |
| O | 0.36316500  | -1.04271300 | -2.64659500 |
| H | -0.39385700 | -1.66349900 | -2.67953300 |
| H | 1.13645400  | -1.62929600 | -2.56608100 |
| H | 0.35901500  | 2.33964800  | 0.34087700  |
| H | -0.43136100 | 1.64898000  | -2.50350700 |
| C | -0.60959700 | 0.84679100  | 2.09917700  |
| C | 0.73887800  | 1.02659800  | 2.78974100  |
| O | 0.68773300  | 2.04707700  | 3.74032600  |
| H | -0.80840100 | 1.22602400  | 1.13118000  |
| H | 1.51460100  | 1.18876500  | 2.02388300  |
| H | 0.98554200  | 0.08291500  | 3.29864500  |
| C | -1.77641000 | 0.48619900  | 2.96792600  |
| H | -2.72645200 | 0.60459800  | 2.44433200  |
| H | -1.69032100 | -0.55625500 | 3.28881300  |
| H | -1.75523500 | 1.11726900  | 3.85927000  |
| O | -0.83196100 | 3.06746900  | 2.04613000  |
| H | 0.13200900  | 2.73254400  | 3.22748200  |
| H | -1.69014100 | 3.27606700  | 2.43984700  |
| H | -2.51655100 | -4.23788700 | -0.22652400 |
| H | -6.11316700 | -2.06411400 | 0.76632800  |
| H | 3.05044000  | -3.97849200 | 0.05648900  |
| H | 6.51409900  | -1.47492500 | 0.67471900  |

**subsequent hydration**

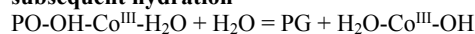

Charge: 0

Spin Multiplicity: 1

Sum of electronic and thermal Free Energies (a.u.): -1600.819542

Thermal correction to Gibbs Free Energy (a.u.): 0.462465

No imaginary frequency

Calculation of single point energy based on the optimized structure,  $E_r = -2839.6010196$  a.u.

|    |             |             |             |
|----|-------------|-------------|-------------|
| C  | 4.86102800  | -2.84227600 | 0.18087100  |
| C  | 5.46095100  | -1.58852700 | 0.38962700  |
| C  | 3.51722400  | -2.94610100 | -0.13847400 |
| H  | 5.45633300  | -3.74640000 | 0.27216000  |
| C  | 4.68449800  | -0.45158200 | 0.27129500  |
| C  | 2.70465200  | -1.79581300 | -0.26287300 |
| C  | 3.31036600  | -0.52305800 | -0.05173700 |
| H  | 5.12462000  | 0.52927800  | 0.43257100  |
| O  | 1.43312500  | -1.96867400 | -0.57943100 |
| C  | 2.57704500  | 0.71097400  | -0.14585700 |
| Co | 0.12195400  | -0.61685700 | -0.73617100 |
| N  | 1.31829600  | 0.83983000  | -0.40226700 |
| H  | 3.15479100  | 1.61698500  | 0.03534900  |
| N  | -1.19698300 | 0.72631000  | -0.96500900 |
| C  | 0.63301500  | 2.13908700  | -0.36292300 |
| C  | -2.45169000 | 0.54829200  | -0.73023400 |
| C  | -0.58524300 | 2.02323300  | -1.28841400 |
| C  | 1.47162000  | 3.36388900  | -0.72519900 |
| H  | -3.10590500 | 1.41891200  | -0.72035600 |
| C  | -3.05417700 | -0.73434400 | -0.48545900 |
| C  | -1.48249200 | 3.24971300  | -1.14735300 |
| C  | 0.58653700  | 4.61650400  | -0.61827300 |
| H  | 1.88605000  | 3.25945700  | -1.73939400 |
| H  | 2.31503600  | 3.47189900  | -0.03515700 |
| C  | -4.38361100 | -0.78438600 | -0.01668200 |
| C  | -2.35131300 | -1.94434100 | -0.77087300 |
| C  | -0.66782100 | 4.50600300  | -1.49388700 |
| H  | -2.35182000 | 3.17297900  | -1.81146500 |
| H  | -1.80524100 | 3.29109700  | -0.09808500 |
| H  | 1.16518700  | 5.50632700  | -0.88881300 |
| H  | 0.28020700  | 4.71571100  | 0.42814100  |
| C  | -5.02341700 | -1.99319600 | 0.19041900  |

|   |             |             |             |
|---|-------------|-------------|-------------|
| H | -4.89568800 | 0.15125400  | 0.19248000  |
| C | -3.03248900 | -3.16435400 | -0.57226500 |
| O | -1.11828000 | -1.96908500 | -1.24069600 |
| H | -0.37611300 | 4.47727800  | -2.55370800 |
| H | -1.29468700 | 5.39498900  | -1.36576700 |
| C | -4.33527300 | -3.18424700 | -0.09907500 |
| H | -4.82876700 | -4.13960200 | 0.05596400  |
| O | -0.31049300 | -0.95729700 | 1.09463100  |
| H | 0.31234600  | -1.63542700 | 1.39855900  |
| O | 0.50494100  | -0.64792200 | -2.68539900 |
| H | -0.26186400 | -1.23270800 | -2.86636500 |
| H | 1.26506100  | -1.25773500 | -2.66076600 |
| H | 0.20747000  | 2.31965000  | 0.66305300  |
| H | -0.23314800 | 1.93061700  | -2.32718800 |
| C | -0.74116600 | -0.05984300 | 2.18745400  |
| C | 0.45722400  | 0.47796500  | 2.98086600  |
| O | 0.03400300  | 1.52417300  | 3.78862900  |
| H | -1.21041200 | 0.78700100  | 1.68943600  |
| H | 1.24427200  | 0.77080200  | 2.26131000  |
| H | 0.87982500  | -0.33153300 | 3.60168700  |
| C | -1.74088600 | -0.80783900 | 3.04548100  |
| H | -2.63275300 | -1.08546100 | 2.47843900  |
| H | -1.29434400 | -1.71464300 | 3.47249000  |
| H | -2.01787400 | -0.14547900 | 3.86926100  |
| O | -0.94465800 | 2.86820400  | 1.91005500  |
| H | -0.38218400 | 2.20228600  | 3.09860100  |
| H | -1.04164700 | 3.80401200  | 2.12865600  |
| H | -2.49663600 | -4.08124600 | -0.79295500 |
| H | -6.04033000 | -2.02225600 | 0.56575200  |
| H | 3.04680400  | -3.91040200 | -0.29962200 |
| H | 6.51287200  | -1.51520100 | 0.64235700  |

#### subsequent hydration

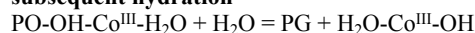

Charge: 0

Spin Multiplicity: 1

Sum of electronic and thermal Free Energies (a.u.): -1600.868186

Thermal correction to Gibbs Free Energy (a.u.): 0.458598

No imaginary frequency

Calculation of single point energy based on the optimized structure,  $E_p = -2839.6393154$  a.u.

|    |             |             |             |
|----|-------------|-------------|-------------|
| C  | 5.75486700  | -1.37096600 | 1.35298800  |
| C  | 6.00622500  | 0.01518600  | 1.32553700  |
| C  | 4.53015400  | -1.88431100 | 0.97153300  |
| H  | 6.53538600  | -2.05080800 | 1.68405000  |
| C  | 4.99879900  | 0.86116200  | 0.90998100  |
| C  | 3.47719600  | -1.03793200 | 0.53280900  |
| C  | 3.73389400  | 0.37015100  | 0.50798500  |
| H  | 5.16351200  | 1.93613300  | 0.88783700  |
| O  | 2.35316700  | -1.59224200 | 0.16148600  |
| C  | 2.73555700  | 1.32462600  | 0.12495100  |
| Co | 0.79296300  | -0.68984100 | -0.43939000 |
| N  | 1.54749300  | 1.05068300  | -0.29701000 |
| H  | 3.02220500  | 2.37230400  | 0.22669500  |
| N  | -0.71279500 | 0.18016300  | -1.22610300 |
| C  | 0.51465400  | 2.07998900  | -0.47509400 |
| C  | -1.89711500 | -0.31933600 | -1.31752600 |
| C  | -0.40305300 | 1.56641700  | -1.59666500 |
| C  | 0.99582000  | 3.50423400  | -0.75014000 |
| H  | -2.70414600 | 0.30896200  | -1.68776600 |
| C  | -2.25644800 | -1.65736100 | -0.93977400 |
| C  | -1.59912600 | 2.49232100  | -1.82010300 |
| C  | -0.20817800 | 4.43371100  | -0.96251200 |
| H  | 1.63784000  | 3.50627900  | -1.64139900 |
| H  | 1.59771100  | 3.87524900  | 0.08558400  |
| C  | -3.62677400 | -2.00301300 | -0.92903500 |
| C  | -1.27091000 | -2.63631000 | -0.60245000 |
| C  | -1.11979300 | 3.92654400  | -2.08498000 |
| H  | -2.19314900 | 2.14255100  | -2.67172500 |
| H  | -2.25019100 | 2.45955200  | -0.93826500 |
| H  | 0.14216100  | 5.44716200  | -1.18449700 |

|   |             |             |             |
|---|-------------|-------------|-------------|
| H | -0.78231700 | 4.49583100  | -0.02888300 |
| C | -4.05198100 | -3.26359800 | -0.55334800 |
| H | -4.35237900 | -1.25381300 | -1.24183800 |
| C | -1.73421500 | -3.92395300 | -0.23018300 |
| O | 0.01858200  | -2.42134100 | -0.66337000 |
| H | -0.57269900 | 3.95648100  | -3.03708900 |
| H | -1.98491900 | 4.58777600  | -2.19947800 |
| C | -3.08450400 | -4.22348000 | -0.20024700 |
| H | -3.40172300 | -5.21889800 | 0.09833700  |
| O | 0.09659700  | -0.47464300 | 1.23307800  |
| H | 0.39087000  | -1.27724300 | 1.68758200  |
| O | 1.57108700  | -1.12019700 | -2.34039400 |
| H | 0.99668900  | -1.90897400 | -2.38428600 |
| H | 2.40553300  | -1.47677100 | -1.98813400 |
| H | -0.07393100 | 2.06680600  | 0.45215200  |
| H | 0.20122500  | 1.52051100  | -2.51435700 |
| C | -2.81460100 | 0.67211100  | 1.89657900  |
| C | -2.53313100 | 2.08270000  | 2.40267500  |
| O | -3.72934200 | 2.77348200  | 2.72198400  |
| H | -1.87745500 | 0.21219500  | 1.55962500  |
| H | -1.95784500 | 2.62682900  | 1.63370200  |
| H | -1.91758000 | 2.04072000  | 3.30657600  |
| C | -3.47835900 | -0.21167300 | 2.94597300  |
| H | -3.74628700 | -1.18400000 | 2.51595000  |
| H | -2.78911600 | -0.39869000 | 3.77553300  |
| H | -4.37847400 | 0.26697600  | 3.34176900  |
| O | -3.70737900 | 0.87518500  | 0.77126500  |
| H | -4.33118100 | 2.55987900  | 1.99257600  |
| H | -4.07562200 | 0.01058500  | 0.54958300  |
| H | -0.98567800 | -4.66383800 | 0.03293600  |
| H | -5.10749100 | -3.51238200 | -0.54086300 |
| H | 4.33076100  | -2.95051600 | 0.99619300  |
| H | 6.96985700  | 0.40768400  | 1.63111100  |

coordinates of transient states, corresponding reactant complexes and product complexes where  $\text{Co}^{\text{III}}(\text{salen})\text{-Cl}$  are unsimplified were listed in the following:

**II-t (PO + H<sub>2</sub>O-Co<sup>III</sup>-Cl)**

PO + H<sub>2</sub>O-Co<sup>III</sup>-Cl = PG + Co<sup>III</sup>(salen)-Cl

transient state

Charge: 0

Spin Multiplicity: 1

Sum of electronic and thermal Free Energies (a.u.): -2537.504701

Thermal correction to Gibbs Free Energy (a.u.): 0.851824

Imaginary frequencies: -473.61

|    |             |             |             |
|----|-------------|-------------|-------------|
| C  | -2.78868900 | -0.60172400 | 2.62711500  |
| C  | -1.50992900 | -1.26570700 | 2.35412200  |
| O  | -2.06870400 | 0.38458800  | 3.39203400  |
| H  | -3.24967800 | -0.16988300 | 1.73933900  |
| H  | -1.02237600 | -1.24247000 | 1.38873600  |
| H  | -1.03028200 | -1.76126100 | 3.19304900  |
| C  | -3.79792300 | -1.32780000 | 3.48876700  |
| H  | -4.55248600 | -0.61330400 | 3.82837800  |
| H  | -4.29422200 | -2.10691400 | 2.90432600  |
| H  | -3.32072600 | -1.77551100 | 4.36482600  |
| O  | -0.29899600 | 0.81115000  | 1.72465500  |
| H  | -1.40695100 | 0.82310700  | 2.72957800  |
| H  | 0.51831600  | 0.52896300  | 2.15961900  |
| C  | -4.53452100 | -1.45708300 | -0.60720900 |
| C  | -5.18379800 | -0.21039900 | -0.43789200 |
| C  | -3.16392500 | -1.62436600 | -0.73350900 |
| H  | -5.15986600 | -2.33928200 | -0.65614900 |
| C  | -4.37937900 | 0.91133600  | -0.46394800 |
| C  | -2.32429800 | -0.45692200 | -0.61104000 |
| C  | -2.97112300 | 0.81831000  | -0.55085300 |
| H  | -4.81200400 | 1.90444400  | -0.39891100 |
| O  | -1.03766400 | -0.60981600 | -0.52423000 |
| C  | -2.23757300 | 2.05394400  | -0.58953700 |
| Co | 0.24294500  | 0.75662400  | -0.13979200 |

|    |             |             |             |
|----|-------------|-------------|-------------|
| N  | -0.95922100 | 2.17663800  | -0.51412700 |
| H  | -2.84224800 | 2.95420000  | -0.70990300 |
| N  | 1.51758300  | 2.11279200  | 0.24738200  |
| Cl | 0.90967500  | 0.74385500  | -2.31302800 |
| C  | -0.25147800 | 3.45101000  | -0.66010500 |
| C  | 2.79372200  | 1.92380200  | 0.31406200  |
| C  | 0.87740800  | 3.42317400  | 0.38761000  |
| C  | -1.08829600 | 4.72364900  | -0.54572100 |
| H  | 3.43905200  | 2.79268800  | 0.44916000  |
| C  | 3.46091400  | 0.66084100  | 0.22393500  |
| C  | 1.78162200  | 4.64855100  | 0.25861900  |
| C  | -0.18441600 | 5.95920500  | -0.66916000 |
| H  | -1.60750000 | 4.73561800  | 0.42244300  |
| H  | -1.85476700 | 4.74896000  | -1.32744900 |
| C  | 4.87438000  | 0.67762200  | 0.16844000  |
| C  | 2.74150700  | -0.57265000 | 0.22824400  |
| C  | 0.94842900  | 5.93447500  | 0.36315800  |
| H  | 2.54925800  | 4.64314000  | 1.03972500  |
| H  | 2.29934200  | 4.61412600  | -0.70877200 |
| H  | -0.78277800 | 6.86935500  | -0.55560900 |
| H  | 0.24568600  | 5.98859200  | -1.67883200 |
| C  | 5.60968600  | -0.48600800 | 0.09349400  |
| H  | 5.36543000  | 1.64535600  | 0.17708800  |
| C  | 3.49779900  | -1.78994100 | 0.13762100  |
| O  | 1.44168300  | -0.62771200 | 0.35626400  |
| H  | 0.52094400  | 6.00523000  | 1.37248800  |
| H  | 1.59764300  | 6.80712700  | 0.23598400  |
| C  | 4.87897400  | -1.69886800 | 0.07770100  |
| H  | 5.44500500  | -2.61898100 | 0.00458100  |
| H  | 0.39656600  | 3.42860200  | 1.37632600  |
| H  | 0.22503500  | 3.40908700  | -1.64848000 |
| C  | -2.54847200 | -2.99947800 | -1.04171700 |
| C  | -3.62766400 | -4.08119000 | -1.22791300 |
| H  | -3.14491000 | -5.02602800 | -1.49465400 |
| H  | -4.20404600 | -4.25384200 | -0.31184300 |
| H  | -4.32578000 | -3.82844200 | -2.03207400 |
| C  | -1.74358300 | -2.89794100 | -2.35950600 |
| H  | -2.41107500 | -2.65165400 | -3.19172400 |
| H  | -0.97129100 | -2.13141400 | -2.29545200 |
| H  | -1.26459500 | -3.85809700 | -2.58075800 |
| C  | -1.61154800 | -3.47375600 | 0.09122400  |
| H  | -0.72662000 | -2.84560600 | 0.15438400  |
| H  | -2.13943000 | -3.47475300 | 1.05622000  |
| H  | -1.27907200 | -4.50046800 | -0.09664900 |
| C  | -6.70549500 | -0.16560800 | -0.26603500 |
| C  | -7.22447100 | 1.27233100  | -0.10689700 |
| H  | -6.78550100 | 1.76540200  | 0.76666900  |
| H  | -7.00523700 | 1.88014400  | -0.99053700 |
| H  | -8.31054800 | 1.26260900  | 0.02740300  |
| C  | -7.09486000 | -0.96287100 | 0.99845000  |
| H  | -8.18135400 | -0.95829500 | 1.13965000  |
| H  | -6.77135400 | -2.00598100 | 0.93238200  |
| H  | -6.63314300 | -0.52401900 | 1.88935700  |
| C  | -7.39084100 | -0.79452100 | -1.49859100 |
| H  | -7.09194600 | -1.83689100 | -1.64112900 |
| H  | -8.48040200 | -0.77267000 | -1.38510900 |
| H  | -7.12913300 | -0.24504600 | -2.40808400 |
| C  | 7.13979800  | -0.52357600 | 0.01804000  |
| C  | 7.75247400  | 0.88576700  | 0.05029300  |
| H  | 7.49746800  | 1.41526700  | 0.97421100  |
| H  | 8.84362800  | 0.81772000  | -0.00329000 |
| H  | 7.41517300  | 1.49108200  | -0.79718100 |
| C  | 7.57371900  | -1.20922400 | -1.29594900 |
| H  | 8.66668100  | -1.24982400 | -1.36593100 |
| H  | 7.19680600  | -2.23397000 | -1.36018000 |
| H  | 7.19319000  | -0.65953800 | -2.16238800 |
| C  | 7.69601800  | -1.31985800 | 1.21860700  |
| H  | 7.40849700  | -0.84714400 | 2.16327100  |
| H  | 7.31950600  | -2.34674800 | 1.23128600  |

|   |            |             |             |
|---|------------|-------------|-------------|
| H | 8.79014800 | -1.36559800 | 1.17648900  |
| C | 2.77265600 | -3.14194500 | 0.07361500  |
| C | 3.75120000 | -4.32218200 | -0.05570800 |
| H | 4.35311000 | -4.25484100 | -0.96769100 |
| H | 4.42944300 | -4.39269400 | 0.80172400  |
| H | 3.18270100 | -5.25632300 | -0.10499500 |
| C | 1.84726000 | -3.15969100 | -1.16459700 |
| H | 1.13809800 | -2.33411700 | -1.14401400 |
| H | 2.44077900 | -3.07186000 | -2.08017200 |
| H | 1.29421900 | -4.10515900 | -1.20764800 |
| C | 1.95344000 | -3.36252500 | 1.36620400  |
| H | 2.61728200 | -3.40391800 | 2.23727300  |
| H | 1.23982500 | -2.55243100 | 1.51183100  |
| H | 1.40707100 | -4.31102300 | 1.31047100  |

**II-t (PO + H<sub>2</sub>O-Co<sup>III</sup>-Cl)**

PO + H<sub>2</sub>O-Co<sup>III</sup>-Cl = PG + Co<sup>III</sup>(salen)-Cl

reactant complex

Charge: 0

Spin Multiplicity: 1

Sum of electronic and thermal Free Energies (a.u.): -2537.579402

Thermal correction to Gibbs Free Energy (a.u.): 0.851717

No imaginary frequency

|    |             |             |             |
|----|-------------|-------------|-------------|
| C  | -3.62858200 | -0.50201000 | 2.69013800  |
| C  | -2.61904700 | -1.03429300 | 3.61391100  |
| O  | -2.41823400 | 0.24553200  | 2.97369100  |
| H  | -3.65261800 | -0.92082600 | 1.68912700  |
| H  | -1.95000600 | -1.82380300 | 3.27664600  |
| H  | -2.78328500 | -0.97672500 | 4.68850800  |
| C  | -4.90092500 | 0.13604300  | 3.17064300  |
| H  | -5.20594600 | 0.92763200  | 2.48002600  |
| H  | -5.70329700 | -0.60799700 | 3.20512200  |
| H  | -4.77318600 | 0.56483400  | 4.16845700  |
| O  | -0.03239100 | 0.76208800  | 1.90683400  |
| H  | -0.95939900 | 0.50948800  | 2.14843500  |
| H  | 0.53573600  | -0.00778300 | 2.08676500  |
| C  | -4.42186800 | -1.58463500 | -0.75538100 |
| C  | -5.11345800 | -0.34669700 | -0.73554000 |
| C  | -3.04970500 | -1.72591200 | -0.63358300 |
| H  | -5.01332800 | -2.48244000 | -0.88229300 |
| C  | -4.33915100 | 0.78817000  | -0.62591000 |
| C  | -2.25279800 | -0.53518500 | -0.45489500 |
| C  | -2.92931700 | 0.72445700  | -0.50092800 |
| H  | -4.79446200 | 1.77319900  | -0.64457300 |
| O  | -0.97806500 | -0.65393000 | -0.24636100 |
| C  | -2.22264800 | 1.96889900  | -0.49097700 |
| Co | 0.30331000  | 0.72962200  | -0.06895300 |
| N  | -0.94636000 | 2.12589300  | -0.37130900 |
| H  | -2.83918200 | 2.85777600  | -0.63097400 |
| N  | 1.57965600  | 2.10892800  | 0.20486800  |
| Cl | 0.78838800  | 0.65775400  | -2.25720300 |
| C  | -0.27628200 | 3.41961100  | -0.55327900 |
| C  | 2.85917100  | 1.94070600  | 0.19283800  |
| C  | 0.92954600  | 3.40704200  | 0.40038900  |
| C  | -1.12878200 | 4.67213400  | -0.35159900 |
| H  | 3.49732900  | 2.82191000  | 0.26819200  |
| C  | 3.54121500  | 0.68464700  | 0.10578500  |
| C  | 1.79863700  | 4.65039000  | 0.21498400  |
| C  | -0.26468000 | 5.93039900  | -0.52488700 |
| H  | -1.57134800 | 4.65335300  | 0.65357100  |
| H  | -1.95390900 | 4.69669400  | -1.07060000 |
| C  | 4.94741600  | 0.72275000  | -0.03971200 |
| C  | 2.84990900  | -0.55610900 | 0.23579800  |
| C  | 0.95128800  | 5.91661900  | 0.40820600  |
| H  | 2.62733700  | 4.64986700  | 0.93076000  |
| H  | 2.23573000  | 4.63960600  | -0.79201400 |
| H  | -0.87190300 | 6.82385000  | -0.34524300 |
| H  | 0.07857300  | 5.98724700  | -1.56623600 |
| C  | 5.70138800  | -0.43091400 | -0.07337500 |
| H  | 5.41689600  | 1.69685000  | -0.12986400 |



|   |             |             |             |
|---|-------------|-------------|-------------|
| C | 3.62535700  | -1.76268300 | 0.21675100  |
| O | 1.55197100  | -0.62137900 | 0.41688200  |
| H | 0.60937800  | 5.96424000  | 1.45083700  |
| H | 1.56926000  | 6.80485800  | 0.24014900  |
| C | 4.99896600  | -1.65160800 | 0.06301500  |
| H | 5.58107500  | -2.56389000 | 0.04014300  |
| H | 0.53069300  | 3.39869700  | 1.42530100  |
| H | 0.12069400  | 3.40680800  | -1.57762200 |
| C | -2.36828900 | -3.09841000 | -0.72530000 |
| C | -3.38488500 | -4.23979900 | -0.90315700 |
| H | -2.84698900 | -5.19029100 | -0.97095400 |
| H | -4.07697100 | -4.31110700 | -0.05646400 |
| H | -3.97164900 | -4.12907800 | -1.82082700 |
| C | -1.43746900 | -3.09907300 | -1.96021500 |
| H | -2.02963400 | -2.98661900 | -2.87463800 |
| H | -0.71520500 | -2.28474300 | -1.91751900 |
| H | -0.89283800 | -4.04733300 | -2.02248400 |
| C | -1.56509100 | -3.39464700 | 0.56219400  |
| H | -0.79698700 | -2.64202900 | 0.72836300  |
| H | -2.23666500 | -3.42400400 | 1.42930700  |
| H | -1.08039200 | -4.37372600 | 0.48391000  |
| C | -6.63833700 | -0.32895700 | -0.88708700 |
| C | -7.20790400 | 1.09610800  | -0.80336200 |
| H | -6.96868300 | 1.57010600  | 0.15459000  |
| H | -6.82376100 | 1.73287400  | -1.60651800 |
| H | -8.29791900 | 1.06698500  | -0.89714700 |
| C | -7.28592300 | -1.17217500 | 0.23254900  |
| H | -8.37497900 | -1.19408100 | 0.11515400  |
| H | -6.92935300 | -2.20603000 | 0.22060000  |
| H | -7.05871200 | -0.74991900 | 1.21618400  |
| C | -7.02115800 | -0.92591200 | -2.25932800 |
| H | -6.67221300 | -1.95759300 | -2.36076500 |
| H | -8.10917500 | -0.92574400 | -2.38973600 |
| H | -6.57682900 | -0.34250000 | -3.07159200 |
| C | 7.22391200  | -0.44907300 | -0.24647400 |
| C | 7.80560800  | 0.96799300  | -0.37372900 |
| H | 7.60189100  | 1.56946100  | 0.51831000  |
| H | 8.89189400  | 0.91358200  | -0.49630100 |
| H | 7.39876800  | 1.49386900  | -1.24341500 |
| C | 7.58541800  | -1.23708000 | -1.52444900 |
| H | 8.67208200  | -1.26687300 | -1.66307600 |
| H | 7.22629700  | -2.26914900 | -1.47741200 |
| H | 7.13838700  | -0.76867400 | -2.40675000 |
| C | 7.87430800  | -1.13102500 | 0.97693400  |
| H | 7.63797900  | -0.58494100 | 1.89583700  |
| H | 7.52322400  | -2.15957000 | 1.10038700  |
| H | 8.96407600  | -1.16110700 | 0.86593100  |
| C | 2.93894400  | -3.13144500 | 0.34029400  |
| C | 3.94585800  | -4.29361300 | 0.28122600  |
| H | 4.49393600  | -4.31179000 | -0.66640000 |
| H | 4.67225800  | -4.25406800 | 1.10035600  |
| H | 3.40426500  | -5.24092800 | 0.36547500  |
| C | 1.94251600  | -3.30687600 | -0.82540200 |
| H | 1.20207600  | -2.51040400 | -0.82892800 |
| H | 2.46960000  | -3.29099600 | -1.78490200 |
| H | 1.42590000  | -4.26929900 | -0.73623000 |
| C | 2.19605900  | -3.23326300 | 1.69198800  |
| H | 2.89645100  | -3.11946300 | 2.52705100  |
| H | 1.42696500  | -2.46572800 | 1.77166000  |
| H | 1.71545100  | -4.21383300 | 1.78279300  |

**II-t (PO + H<sub>2</sub>O-Co<sup>III</sup>-Cl)**

PO + H<sub>2</sub>O-Co<sup>III</sup>-Cl = PG + Co<sup>III</sup>(salen)-Cl

product complex

Charge: 0

Spin Multiplicity: 1

Sum of electronic and thermal Free Energies (a.u.): -2537.599019

Thermal correction to Gibbs Free Energy (a.u.): 0.855412

No imaginary frequency

|   |             |            |            |
|---|-------------|------------|------------|
| C | -2.08331700 | 1.64640900 | 2.67234500 |
|---|-------------|------------|------------|

|    |             |             |             |
|----|-------------|-------------|-------------|
| C  | -1.34024700 | 0.32446000  | 2.54662700  |
| O  | -1.22385700 | 2.63091400  | 3.24514700  |
| H  | -2.38242600 | 1.96016400  | 1.66506200  |
| H  | -1.92680300 | -0.42634400 | 2.01550500  |
| H  | -1.07322800 | -0.04926100 | 3.54154900  |
| C  | -3.32590500 | 1.51035000  | 3.53688200  |
| H  | -3.81080700 | 2.48385900  | 3.64494100  |
| H  | -4.03756400 | 0.81807400  | 3.07589000  |
| H  | -3.06677200 | 1.14621600  | 4.53595900  |
| O  | -0.11348500 | 0.60536700  | 1.83471800  |
| H  | -0.33603800 | 2.42780100  | 2.91664900  |
| H  | 0.52184200  | -0.14000400 | 1.89146200  |
| C  | -4.52492900 | -1.90030000 | -0.35458700 |
| C  | -5.23850200 | -0.68871600 | -0.54202600 |
| C  | -3.14627900 | -2.01081400 | -0.31375700 |
| H  | -5.10751500 | -2.80580800 | -0.24333000 |
| C  | -4.48423400 | 0.44925200  | -0.71279100 |
| C  | -2.36523900 | -0.80576800 | -0.43604900 |
| C  | -3.06743400 | 0.41959400  | -0.65958300 |
| H  | -4.95812900 | 1.41049200  | -0.88307900 |
| O  | -1.07111100 | -0.87630500 | -0.32026900 |
| C  | -2.38762400 | 1.66230400  | -0.83797500 |
| Co | 0.15714000  | 0.54984400  | -0.22773500 |
| N  | -1.12155100 | 1.87460200  | -0.68053300 |
| H  | -3.01892200 | 2.50797200  | -1.11232300 |
| N  | 1.36929500  | 1.99879200  | -0.00094000 |
| Cl | 0.71497600  | 0.34569500  | -2.37526300 |
| C  | -0.48879200 | 3.17099500  | -0.95501400 |
| C  | 2.65509400  | 1.88305400  | 0.02684700  |
| C  | 0.66610300  | 3.28455800  | 0.05401000  |
| C  | -1.39467400 | 4.40071900  | -0.88776500 |
| H  | 3.25578600  | 2.79268400  | 0.05701700  |
| C  | 3.38958200  | 0.65276700  | 0.02569900  |
| C  | 1.49917200  | 4.54204700  | -0.18625000 |
| C  | -0.57064400 | 5.67615200  | -1.11901900 |
| H  | -1.88057500 | 4.43867200  | 0.09647500  |
| H  | -2.18569100 | 4.33856200  | -1.64184400 |
| C  | 4.79417900  | 0.74242200  | -0.11055200 |
| C  | 2.75099700  | -0.60820800 | 0.20649300  |
| C  | 0.59713000  | 5.78395900  | -0.13186600 |
| H  | 2.29046500  | 4.62847900  | 0.56596900  |
| H  | 1.98596300  | 4.47183300  | -1.16767300 |
| H  | -1.21933700 | 6.55437000  | -1.03666300 |
| H  | -0.17931200 | 5.66859800  | -2.14484400 |
| C  | 5.59319900  | -0.38149800 | -0.09192600 |
| H  | 5.22565600  | 1.72941200  | -0.23992300 |
| C  | 3.56869100  | -1.78248000 | 0.23564500  |
| O  | 1.45048300  | -0.71262800 | 0.39071900  |
| H  | 0.20255500  | 5.89686700  | 0.88654600  |
| H  | 1.19007600  | 6.68041000  | -0.34070400 |
| C  | 4.93911100  | -1.62257800 | 0.08596000  |
| H  | 5.55653700  | -2.51128900 | 0.10099400  |
| H  | 0.20410000  | 3.35179400  | 1.05000900  |
| H  | -0.04371700 | 3.09099600  | -1.95575200 |
| C  | -2.44879800 | -3.37242300 | -0.17848800 |
| C  | -3.45620700 | -4.52649600 | -0.03324600 |
| H  | -2.90896900 | -5.47036100 | 0.05040300  |
| H  | -4.07494800 | -4.42213800 | 0.86490400  |
| H  | -4.11803900 | -4.60709300 | -0.90170800 |
| C  | -1.61954400 | -3.62726300 | -1.45820800 |
| H  | -2.28080700 | -3.69580200 | -2.32851900 |
| H  | -0.90179300 | -2.82642000 | -1.63226100 |
| H  | -1.07243000 | -4.57239600 | -1.37163900 |
| C  | -1.53416400 | -3.39802400 | 1.06726500  |
| H  | -0.75063500 | -2.64719800 | 0.99330900  |
| H  | -2.11971000 | -3.21754700 | 1.97682300  |
| H  | -1.06223500 | -4.38190900 | 1.16318600  |
| C  | -6.77023100 | -0.70745500 | -0.55443500 |
| C  | -7.36046500 | 0.69442400  | -0.77492300 |

|   |             |             |             |
|---|-------------|-------------|-------------|
| H | -7.05997800 | 1.38786500  | 0.01742400  |
| H | -7.05044000 | 1.11574000  | -1.73665100 |
| H | -8.45357800 | 0.64154400  | -0.77280200 |
| C | -7.28508200 | -1.24229200 | 0.79985600  |
| H | -8.38027200 | -1.27340800 | 0.81017000  |
| H | -6.92054100 | -2.25405600 | 0.99972000  |
| H | -6.95298200 | -0.59902200 | 1.62132400  |
| C | -7.26776400 | -1.62695100 | -1.69098500 |
| H | -6.90848700 | -2.65273200 | -1.56859700 |
| H | -8.36290000 | -1.65693100 | -1.70873900 |
| H | -6.91809000 | -1.26462700 | -2.66271200 |
| C | 7.11683200  | -0.34503000 | -0.25278800 |
| C | 7.64251400  | 1.08829100  | -0.43135100 |
| H | 7.40654000  | 1.71582000  | 0.43440500  |
| H | 8.73115400  | 1.07258700  | -0.54246200 |
| H | 7.22437000  | 1.56277700  | -1.32492900 |
| C | 7.52050300  | -1.16753500 | -1.49589600 |
| H | 8.60855700  | -1.15817200 | -1.62496500 |
| H | 7.20348100  | -2.21083800 | -1.41057900 |
| H | 7.06312200  | -0.75287500 | -2.39953300 |
| C | 7.78178300  | -0.95192200 | 1.00191400  |
| H | 7.51502700  | -0.38069800 | 1.89686200  |
| H | 7.47199200  | -1.98849800 | 1.16266100  |
| H | 8.87270400  | -0.94143400 | 0.90063400  |
| C | 2.93663800  | -3.17095700 | 0.41605200  |
| C | 3.98680500  | -4.29528400 | 0.37553400  |
| H | 4.52232300  | -4.31982200 | -0.57912200 |
| H | 4.72170600  | -4.20583900 | 1.18299500  |
| H | 3.48268200  | -5.25921300 | 0.49447500  |
| C | 1.92532700  | -3.42867900 | -0.72198900 |
| H | 1.15111000  | -2.66508800 | -0.74324400 |
| H | 2.43400000  | -3.42889800 | -1.69149800 |
| H | 1.45184400  | -4.40733700 | -0.58576700 |
| C | 2.22950200  | -3.25083100 | 1.78794700  |
| H | 2.94485400  | -3.08432200 | 2.60105400  |
| H | 1.43424500  | -2.51027700 | 1.86352800  |
| H | 1.78465000  | -4.24258500 | 1.92441700  |

### II-m (PO + H<sub>2</sub>O-Co<sup>III</sup>-Cl)

PO + H<sub>2</sub>O-Co<sup>III</sup>-Cl = PG + Co<sup>III</sup>(salen)-Cl

transition state

Charge: 0

Spin Multiplicity: 1

Sum of electronic and thermal Free Energies (a.u.): -2537.513809

Thermal correction to Gibbs Free Energy (a.u.): 0.846725

Imaginary frequencies: -326.02

|    |             |             |             |
|----|-------------|-------------|-------------|
| C  | -4.48510800 | -1.86194900 | -0.46177300 |
| C  | -5.19061400 | -0.64315900 | -0.68671800 |
| C  | -3.11834400 | -1.97199700 | -0.32298800 |
| H  | -5.07331400 | -2.76928900 | -0.40980500 |
| C  | -4.43813200 | 0.50256700  | -0.75652400 |
| C  | -2.31972900 | -0.76110200 | -0.38137400 |
| C  | -3.02651700 | 0.48528500  | -0.56451900 |
| H  | -4.90405200 | 1.46708100  | -0.92875400 |
| O  | -1.05087500 | -0.83607500 | -0.23741300 |
| C  | -2.33843700 | 1.74292400  | -0.67568200 |
| Co | 0.21457200  | 0.59228200  | -0.10828100 |
| N  | -1.07407600 | 1.93346000  | -0.53142300 |
| H  | -2.97097300 | 2.59850300  | -0.91313300 |
| N  | 1.45380300  | 2.02135700  | 0.04388500  |
| C  | -0.44026900 | 3.23494600  | -0.78294400 |
| C  | 2.73847900  | 1.89054500  | -0.01215600 |
| C  | 0.77184700  | 3.31060500  | 0.16053000  |
| C  | -1.32981800 | 4.46914600  | -0.63298300 |
| H  | 3.34908500  | 2.79407600  | -0.02678400 |
| C  | 3.45533800  | 0.65496300  | -0.03655800 |
| C  | 1.60239400  | 4.56440900  | -0.11128700 |
| C  | -0.50891400 | 5.74340400  | -0.88151000 |
| H  | -1.75694400 | 4.47802100  | 0.37842800  |

|   |             |             |             |
|---|-------------|-------------|-------------|
| H | -2.16304800 | 4.43605500  | -1.34236200 |
| C | 4.85794200  | 0.72087300  | -0.21582600 |
| C | 2.79985500  | -0.59415100 | 0.19025900  |
| C | 0.72166500  | 5.81470500  | 0.02951800  |
| H | 2.44284900  | 4.62562900  | 0.58812100  |
| H | 2.02292600  | 4.51056200  | -1.12386500 |
| H | -1.14174100 | 6.62517700  | -0.73486700 |
| H | -0.18369800 | 5.76035200  | -1.93012800 |
| C | 5.64440700  | -0.40953000 | -0.18568100 |
| H | 5.29637500  | 1.69929000  | -0.38425400 |
| C | 3.61717700  | -1.77615800 | 0.25209700  |
| O | 1.51525500  | -0.69151300 | 0.39267300  |
| H | 0.39477000  | 5.90692700  | 1.07386500  |
| H | 1.31005100  | 6.71033000  | -0.19626500 |
| C | 4.98110500  | -1.63779900 | 0.05870800  |
| H | 5.59034600  | -2.53216800 | 0.09310300  |
| C | -2.42534100 | -3.32963600 | -0.15232300 |
| C | -1.54576900 | -3.58855700 | -1.39752200 |
| H | -2.17353400 | -3.66656800 | -2.29157200 |
| H | -0.82551600 | -2.78603500 | -1.55058000 |
| H | -0.99835900 | -4.53004200 | -1.28233900 |
| C | -1.56224800 | -3.34093400 | 1.13123100  |
| H | -0.78427000 | -2.58139400 | 1.09352200  |
| H | -2.19030500 | -3.16704400 | 2.01489200  |
| H | -1.08799500 | -4.32090300 | 1.25022000  |
| C | -3.43667400 | -4.48377300 | -0.04019800 |
| H | -4.10078600 | -4.36705200 | 0.82391200  |
| H | -4.05363700 | -4.58115200 | -0.93950700 |
| H | -2.89261800 | -5.42453400 | 0.08589100  |
| C | 2.97271800  | -3.14514900 | 0.51294300  |
| C | 4.00908500  | -4.28203200 | 0.53105100  |
| H | 4.53279100  | -4.37320000 | -0.42626600 |
| H | 4.75547300  | -4.14846600 | 1.32184300  |
| H | 3.49676700  | -5.23125500 | 0.71727900  |
| C | 2.26628500  | -3.13705700 | 1.88840300  |
| H | 2.99061000  | -2.95290000 | 2.69023100  |
| H | 1.49746400  | -2.36580900 | 1.92481300  |
| H | 1.79539700  | -4.10928200 | 2.07416900  |
| C | 1.95158700  | -3.45175000 | -0.60352000 |
| H | 1.46371200  | -4.41441100 | -0.41149300 |
| H | 1.19149800  | -2.67564500 | -0.65838200 |
| H | 2.45304300  | -3.51182900 | -1.57505100 |
| C | 7.16238100  | -0.39851200 | -0.39424900 |
| C | 7.69876700  | 1.02025100  | -0.64333100 |
| H | 7.25479700  | 1.46674600  | -1.53881700 |
| H | 7.49856900  | 1.68188200  | 0.20592900  |
| H | 8.78302800  | 0.98725000  | -0.79018200 |
| C | 7.86137400  | -0.96591200 | 0.86048000  |
| H | 7.54340300  | -1.99104800 | 1.07112200  |
| H | 8.94888500  | -0.97458700 | 0.72487500  |
| H | 7.63008100  | -0.35727700 | 1.74061700  |
| C | 7.51906100  | -1.27143900 | -1.61723700 |
| H | 7.19089500  | -2.30621000 | -1.48359200 |
| H | 7.03881800  | -0.88407900 | -2.52112500 |
| H | 8.60292000  | -1.28225300 | -1.77976100 |
| C | -6.71398100 | -0.67372100 | -0.83523000 |
| C | -7.29587900 | 0.72682600  | -1.08342500 |
| H | -7.07840900 | 1.40774800  | -0.25379600 |
| H | -6.90151000 | 1.16945100  | -2.00355700 |
| H | -8.38370100 | 0.66431200  | -1.18437100 |
| C | -7.34082800 | -1.23684600 | 0.45949000  |
| H | -8.43193200 | -1.27973700 | 0.37161200  |
| H | -6.98402800 | -2.24793000 | 0.67602100  |
| H | -7.09246500 | -0.60230000 | 1.31704400  |
| C | -7.09967900 | -1.57770400 | -2.02655400 |
| H | -6.74301100 | -2.60255700 | -1.89057500 |
| H | -8.18851600 | -1.61574100 | -2.14132700 |
| H | -6.66893700 | -1.19511100 | -2.95684500 |
| H | 0.37749900  | 3.36689500  | 1.18535200  |

|    |             |             |             |
|----|-------------|-------------|-------------|
| H  | -0.04801100 | 3.17475000  | -1.80725700 |
| Cl | 0.68179700  | 0.40208000  | -2.33245800 |
| O  | -0.18875900 | 0.74777000  | 1.75500100  |
| H  | 0.64707900  | 0.50329700  | 2.17340500  |
| H  | -0.96171400 | 1.79156800  | 2.21716000  |
| C  | -2.48155500 | 0.44081000  | 3.25475900  |
| C  | -2.13934600 | 1.76801000  | 3.82809500  |
| O  | -1.75774400 | 2.39077300  | 2.61176100  |
| H  | -1.69925800 | -0.31237500 | 3.21113500  |
| H  | -1.33448100 | 1.72401000  | 4.57276200  |
| H  | -3.00603000 | 2.28479400  | 4.25184100  |
| C  | -3.66830100 | 0.20183400  | 2.48887700  |
| H  | -3.35043000 | 0.36679600  | 1.41389900  |
| H  | -3.97418700 | -0.84769100 | 2.47185700  |
| H  | -4.49275700 | 0.88863900  | 2.68769100  |

**II-m (PO + H<sub>2</sub>O-Co<sup>III</sup>-Cl)**

PO + H<sub>2</sub>O-Co<sup>III</sup>-Cl = PG + Co<sup>III</sup>(salen)-Cl

reactant complex

Charge: 0

Spin Multiplicity: 1

Sum of electronic and thermal Free Energies (a.u.): -2537.571950

Thermal correction to Gibbs Free Energy (a.u.): 0.851748

No imaginary frequency

|    |             |             |             |
|----|-------------|-------------|-------------|
| C  | -4.37292600 | -2.14299900 | -0.25550000 |
| C  | -5.13222600 | -0.94973900 | -0.38321400 |
| C  | -2.99410100 | -2.21678000 | -0.32178800 |
| H  | -4.92077600 | -3.06360400 | -0.09878100 |
| C  | -4.42401100 | 0.20760100  | -0.60740600 |
| C  | -2.25123300 | -0.99172400 | -0.50489700 |
| C  | -3.00627400 | 0.21642300  | -0.66092700 |
| H  | -4.93511100 | 1.15569900  | -0.74230200 |
| O  | -0.95687700 | -1.03411500 | -0.54297700 |
| C  | -2.37606000 | 1.47417200  | -0.90276100 |
| Co | 0.19487100  | 0.44464100  | -0.29435700 |
| N  | -1.11129600 | 1.72075600  | -0.80733400 |
| H  | -3.04118000 | 2.29364400  | -1.17881600 |
| N  | 1.32558700  | 1.95993300  | 0.01215700  |
| C  | -0.50858200 | 3.01963200  | -1.11430500 |
| C  | 2.61436500  | 1.89716100  | 0.10537700  |
| C  | 0.58486000  | 3.22660600  | -0.04917300 |
| C  | -1.45080000 | 4.22089300  | -1.17261500 |
| H  | 3.17585600  | 2.83131300  | 0.14158000  |
| C  | 3.39885800  | 0.70232500  | 0.15340400  |
| C  | 1.39628000  | 4.49079400  | -0.33104700 |
| C  | -0.64886700 | 5.50136000  | -1.44839400 |
| H  | -1.98460200 | 4.31300300  | -0.21699500 |
| H  | -2.20187700 | 4.08193400  | -1.95719400 |
| C  | 4.80455400  | 0.85140000  | 0.09205700  |
| C  | 2.80202800  | -0.58686600 | 0.28464000  |
| C  | 0.46119400  | 5.70697300  | -0.41125900 |
| H  | 2.14224300  | 4.65377700  | 0.45411500  |
| H  | 1.93837000  | 4.36811600  | -1.27755500 |
| H  | -1.32171300 | 6.36533800  | -1.46058200 |
| H  | -0.20281000 | 5.43509500  | -2.44924500 |
| C  | 5.64695500  | -0.23872800 | 0.13358000  |
| H  | 5.20029700  | 1.85737800  | -0.00215100 |
| C  | 3.66827600  | -1.72842100 | 0.32735700  |
| O  | 1.50594700  | -0.74518500 | 0.41343700  |
| H  | 0.00875400  | 5.87707200  | 0.57498300  |
| H  | 1.04195900  | 6.60430600  | -0.64914400 |
| C  | 5.03547300  | -1.50998400 | 0.25114600  |
| H  | 5.68755500  | -2.37363900 | 0.27655800  |
| C  | -2.25014800 | -3.55512400 | -0.21532500 |
| C  | -1.47060400 | -3.80640200 | -1.52697800 |
| H  | -2.16519900 | -3.89190700 | -2.36977800 |
| H  | -0.77145200 | -2.99748800 | -1.73468900 |
| H  | -0.90808900 | -4.74389600 | -1.45454600 |
| C  | -1.28057900 | -3.52651400 | 0.98749900  |
| H  | -0.55279500 | -2.72503000 | 0.88365300  |

|    |             |             |             |
|----|-------------|-------------|-------------|
| H  | -1.83589300 | -3.38303300 | 1.92188100  |
| H  | -0.74324800 | -4.47869000 | 1.05711600  |
| C  | -3.21185700 | -4.73840900 | -0.00942500 |
| H  | -3.78664100 | -4.64550400 | 0.91870400  |
| H  | -3.91485200 | -4.84759500 | -0.84210900 |
| H  | -2.63124700 | -5.66384300 | 0.05402000  |
| C  | 3.08335800  | -3.14318200 | 0.44594400  |
| C  | 4.17574800  | -4.22660500 | 0.41271400  |
| H  | 4.74653100  | -4.20239400 | -0.52143900 |
| H  | 4.87683900  | -4.13496300 | 1.24959500  |
| H  | 3.70417300  | -5.21149800 | 0.48514300  |
| C  | 2.33539900  | -3.28113300 | 1.79118800  |
| H  | 3.02437100  | -3.12929900 | 2.62995400  |
| H  | 1.52653800  | -2.55557800 | 1.86504400  |
| H  | 1.90527500  | -4.28455700 | 1.88245600  |
| C  | 2.12284100  | -3.40829900 | -0.73498800 |
| H  | 1.68115700  | -4.40645700 | -0.63841000 |
| H  | 1.32194900  | -2.67313200 | -0.77100200 |
| H  | 2.66758400  | -3.36776600 | -1.68391900 |
| C  | 7.17394500  | -0.13855300 | 0.05258800  |
| C  | 7.64965000  | 1.31817600  | -0.06683500 |
| H  | 7.26000200  | 1.79648900  | -0.97117400 |
| H  | 7.34220400  | 1.91526200  | 0.79806200  |
| H  | 8.74246500  | 1.34846300  | -0.11959200 |
| C  | 7.79884700  | -0.74864500 | 1.32620000  |
| H  | 7.52209100  | -1.79970400 | 1.44854200  |
| H  | 8.89237100  | -0.69413400 | 1.28149500  |
| H  | 7.46473900  | -0.20924800 | 2.21835400  |
| C  | 7.67419400  | -0.91409300 | -1.18562400 |
| H  | 7.39585900  | -1.97079300 | -1.13989500 |
| H  | 7.24640900  | -0.49629000 | -2.10220000 |
| H  | 8.76624000  | -0.85853300 | -1.25816700 |
| C  | -6.65898000 | -1.00807900 | -0.27647200 |
| C  | -7.30026300 | 0.37907600  | -0.44115800 |
| H  | -6.95481500 | 1.07684500  | 0.32946500  |
| H  | -7.07713900 | 0.81319300  | -1.42102700 |
| H  | -8.38824400 | 0.29934500  | -0.35279400 |
| C  | -7.05480400 | -1.56121700 | 1.11006500  |
| H  | -8.14486300 | -1.62149200 | 1.20484800  |
| H  | -6.64893500 | -2.56314500 | 1.27589600  |
| H  | -6.67671300 | -0.91254200 | 1.90726800  |
| C  | -7.22115200 | -1.93478400 | -1.37639200 |
| H  | -6.82453900 | -2.95030100 | -1.28986800 |
| H  | -8.31319900 | -1.99531800 | -1.30814700 |
| H  | -6.95885000 | -1.55812400 | -2.36991000 |
| H  | 0.06985400  | 3.34926300  | 0.91501100  |
| H  | -0.00271200 | 2.89918700  | -2.08103500 |
| Cl | 0.93887900  | 0.29929800  | -2.40585300 |
| O  | -0.43037100 | 0.42016600  | 1.61307000  |
| H  | 0.37038800  | 0.01363700  | 1.98423300  |
| H  | -0.60656600 | 1.30048500  | 2.02080900  |
| C  | -2.96681300 | 1.97802200  | 2.43514900  |
| C  | -2.34455800 | 2.04206400  | 3.76173500  |
| O  | -1.63881900 | 2.55926000  | 2.60782200  |
| H  | -2.93889600 | 1.02297100  | 1.91481200  |
| H  | -1.91120600 | 1.14376600  | 4.19722400  |
| H  | -2.65974400 | 2.80577600  | 4.46973400  |
| C  | -4.04799200 | 2.92944100  | 2.00897600  |
| H  | -3.95536400 | 3.16195600  | 0.94460200  |
| H  | -5.02899500 | 2.46914400  | 2.16489400  |
| H  | -3.99930700 | 3.86278700  | 2.57617100  |

**H-m (PO + H<sub>2</sub>O-Co<sup>III</sup>-Cl)**

PO + H<sub>2</sub>O-Co<sup>III</sup>-Cl = PG + Co<sup>III</sup>(salen)-Cl

product complex

Charge: 0

Spin Multiplicity: 1

Sum of electronic and thermal Free Energies (a.u.): -2537.596812

Thermal correction to Gibbs Free Energy (a.u.): 0.854896

No imaginary frequency

|    |             |             |             |
|----|-------------|-------------|-------------|
| C  | -4.65401300 | -1.69550100 | -0.45054600 |
| C  | -5.34892000 | -0.46402300 | -0.56289200 |
| C  | -3.27814900 | -1.82707400 | -0.38675200 |
| H  | -5.24961500 | -2.59895900 | -0.42565200 |
| C  | -4.57830500 | 0.67361800  | -0.62720500 |
| C  | -2.48175500 | -0.62672500 | -0.40059000 |
| C  | -3.16335700 | 0.62146700  | -0.54572900 |
| H  | -5.03724400 | 1.65086200  | -0.73638200 |
| O  | -1.19060300 | -0.72336600 | -0.26778900 |
| C  | -2.46508900 | 1.86304800  | -0.62875400 |
| Co | 0.07138700  | 0.66761900  | -0.17418800 |
| N  | -1.19316300 | 2.04427000  | -0.47320400 |
| H  | -3.08495400 | 2.73656500  | -0.83350300 |
| N  | 1.34112200  | 2.06641000  | 0.05180600  |
| C  | -0.54160900 | 3.34191300  | -0.69629300 |
| C  | 2.62184800  | 1.91943100  | -0.01424400 |
| C  | 0.67839100  | 3.36016000  | 0.23868700  |
| C  | -1.40796500 | 4.58555500  | -0.49324200 |
| H  | 3.24791500  | 2.81161900  | 0.02201300  |
| C  | 3.32184900  | 0.67270400  | -0.11754800 |
| C  | 1.52768000  | 4.61228800  | 0.02660300  |
| C  | -0.56543200 | 5.85440100  | -0.69211900 |
| H  | -1.83460200 | 4.56898300  | 0.51874600  |
| H  | -2.24461000 | 4.59286700  | -1.19875200 |
| C  | 4.71791900  | 0.73240900  | -0.33252600 |
| C  | 2.66235300  | -0.57721900 | 0.05881900  |
| C  | 0.66535300  | 5.86828500  | 0.22130200  |
| H  | 2.36856400  | 4.62995900  | 0.72801600  |
| H  | 1.94748200  | 4.59816900  | -0.98766100 |
| H  | -1.18314500 | 6.74016000  | -0.51096800 |
| H  | -0.23985700 | 5.90664300  | -1.73934900 |
| C  | 5.48743500  | -0.41087300 | -0.39122700 |
| H  | 5.16702500  | 1.71216100  | -0.45684500 |
| C  | 3.45044000  | -1.77056000 | 0.02064100  |
| O  | 1.36918900  | -0.65669700 | 0.30431400  |
| H  | 0.34001700  | 5.92196400  | 1.26890000  |
| H  | 1.26782400  | 6.76316000  | 0.03413000  |
| C  | 4.81401700  | -1.63998700 | -0.20363000 |
| H  | 5.40917500  | -2.54311100 | -0.24147000 |
| C  | -2.60033200 | -3.20559500 | -0.36287800 |
| C  | -1.77689200 | -3.36132700 | -1.66237000 |
| H  | -2.44148500 | -3.34891800 | -2.53268100 |
| H  | -1.05170400 | -2.55549400 | -1.77179500 |
| H  | -1.23944100 | -4.31588900 | -1.65828200 |
| C  | -1.68422200 | -3.35504800 | 0.87312200  |
| H  | -0.87772900 | -2.62553200 | 0.85504600  |
| H  | -2.26186500 | -3.22892300 | 1.79684400  |
| H  | -1.24266700 | -4.35741300 | 0.89009000  |
| C  | -3.62505800 | -4.35281200 | -0.31441100 |
| H  | -4.24619600 | -4.31164600 | 0.58722600  |
| H  | -4.28411100 | -4.35411000 | -1.18857500 |
| H  | -3.09190100 | -5.30833600 | -0.30567400 |
| C  | 2.79471100  | -3.14670700 | 0.21162800  |
| C  | 3.81713000  | -4.29312900 | 0.11837300  |
| H  | 4.31086900  | -4.32184700 | -0.85840400 |
| H  | 4.58746500  | -4.22516300 | 0.89426400  |
| H  | 3.29772600  | -5.24696900 | 0.25177100  |
| C  | 2.13699100  | -3.22922900 | 1.60844200  |
| H  | 2.88219900  | -3.07575600 | 2.39687100  |
| H  | 1.35213600  | -2.48145700 | 1.71675000  |
| H  | 1.68762600  | -4.21766400 | 1.75345700  |
| C  | 1.73444000  | -3.36618900 | -0.88858800 |
| H  | 1.23938200  | -4.33285300 | -0.74374200 |
| H  | 0.98126700  | -2.58179400 | -0.87070700 |
| H  | 2.20480200  | -3.36958600 | -1.87725600 |
| C  | 6.99955900  | -0.40651500 | -0.64083900 |
| C  | 7.54971900  | 1.01800600  | -0.81614400 |
| H  | 7.09077400  | 1.52517000  | -1.67090000 |
| H  | 7.38233300  | 1.62849400  | 0.07734300  |

|    |             |             |             |
|----|-------------|-------------|-------------|
| H  | 8.62896900  | 0.97919800  | -0.99340800 |
| C  | 7.72167600  | -1.06051600 | 0.55730600  |
| H  | 7.39636400  | -2.09334500 | 0.71128500  |
| H  | 8.80467300  | -1.07294500 | 0.39178000  |
| H  | 7.52223800  | -0.50619000 | 1.47997900  |
| C  | 7.30844300  | -1.20661800 | -1.92502900 |
| H  | 6.97068500  | -2.24387900 | -1.84585800 |
| H  | 6.80934500  | -0.75843700 | -2.78974000 |
| H  | 8.38688300  | -1.21993500 | -2.11828900 |
| C  | -6.87973000 | -0.46313900 | -0.62404600 |
| C  | -7.44938300 | 0.95920100  | -0.74569900 |
| H  | -7.16648500 | 1.58150800  | 0.10966800  |
| H  | -7.10618600 | 1.45431500  | -1.65984700 |
| H  | -8.54252500 | 0.91949100  | -0.78054500 |
| C  | -7.44449300 | -1.10268900 | 0.66313100  |
| H  | -8.53965900 | -1.12127400 | 0.63455100  |
| H  | -7.09675400 | -2.13210300 | 0.78913900  |
| H  | -7.13410400 | -0.53466100 | 1.54601700  |
| C  | -7.34781300 | -1.27862900 | -1.84918100 |
| H  | -7.00217600 | -2.31524700 | -1.80138900 |
| H  | -8.44201900 | -1.29385800 | -1.90491900 |
| H  | -6.96249500 | -0.84086800 | -2.77532100 |
| H  | 0.29353200  | 3.36035800  | 1.26920900  |
| H  | -0.16208900 | 3.32227300  | -1.72700800 |
| Cl | 0.49008600  | 0.56515200  | -2.36022200 |
| O  | -0.05603000 | 0.63231100  | 1.92111000  |
| H  | 0.61792800  | -0.08042300 | 1.82243400  |
| H  | 0.65881200  | 0.96033100  | 4.18861000  |
| C  | -1.18628900 | 0.11777100  | 2.68367300  |
| C  | -0.62194300 | -0.46590900 | 3.97810800  |
| O  | 0.03416100  | 0.50675700  | 4.77174400  |
| H  | -1.66143400 | -0.67715600 | 2.10420100  |
| H  | 0.04989400  | -1.30516700 | 3.72902800  |
| H  | -1.44097100 | -0.87139800 | 4.58048300  |
| C  | -2.14547300 | 1.26903800  | 2.91985500  |
| H  | -1.67676900 | 2.02570200  | 3.55363900  |
| H  | -2.44807500 | 1.71773600  | 1.97442000  |
| H  | -3.04179300 | 0.90084500  | 3.42737900  |

### III-t (PO-Co<sup>III</sup>-Cl + H<sub>2</sub>O)

PO-Co<sup>III</sup>-Cl + H<sub>2</sub>O = PG + Co<sup>III</sup>(salen)-Cl

transition state

Charge: 0

Spin Multiplicity: 1

Sum of electronic and thermal Free Energies (a.u.): -2537.511870

Thermal correction to Gibbs Free Energy (a.u.): 0.850505

Imaginary frequencies: -379.16

|    |             |             |             |
|----|-------------|-------------|-------------|
| C  | -4.75536000 | -1.60882200 | -0.26942800 |
| C  | -5.41779500 | -0.35962600 | -0.17227500 |
| C  | -3.38555200 | -1.77104700 | -0.38662500 |
| H  | -5.37257400 | -2.49799600 | -0.26688700 |
| C  | -4.62454400 | 0.76479400  | -0.24031400 |
| C  | -2.55745200 | -0.59145800 | -0.35470800 |
| C  | -3.21447200 | 0.67928400  | -0.33579500 |
| H  | -5.06493200 | 1.75654100  | -0.22205400 |
| O  | -1.26419400 | -0.72770400 | -0.34558900 |
| C  | -2.49944300 | 1.91053600  | -0.48707400 |
| Co | 0.02687800  | 0.65710100  | -0.17811800 |
| N  | -1.21722400 | 2.04968200  | -0.51484000 |
| H  | -3.11845900 | 2.79963000  | -0.61597200 |
| N  | 1.30523100  | 2.05085200  | 0.05533900  |
| C  | -0.54040100 | 3.31462100  | -0.80834000 |
| C  | 2.58425000  | 1.87481300  | 0.07547500  |
| C  | 0.67264900  | 3.37170100  | 0.13671600  |
| C  | -1.37658600 | 4.58937700  | -0.71578500 |
| H  | 3.22589800  | 2.75411400  | 0.13733200  |
| C  | 3.26612800  | 0.61782300  | 0.01099700  |
| C  | 1.55622900  | 4.58081700  | -0.16983000 |
| C  | -0.49827700 | 5.81255300  | -1.01810100 |



|   |             |             |             |
|---|-------------|-------------|-------------|
| H | -1.80687600 | 4.67559900  | 0.29161200  |
| H | -2.21085700 | 4.55199200  | -1.42385100 |
| C | 4.67628000  | 0.65905600  | -0.09739500 |
| C | 2.57207000  | -0.62867100 | 0.07498900  |
| C | 0.72624000  | 5.87138900  | -0.09753200 |
| H | 2.38682200  | 4.63982000  | 0.54096600  |
| H | 1.98869400  | 4.46480300  | -1.17189400 |
| H | -1.09068500 | 6.72854200  | -0.92125900 |
| H | -0.16410600 | 5.76233400  | -2.06256400 |
| C | 5.43227100  | -0.49148800 | -0.16556300 |
| H | 5.14751300  | 1.63581400  | -0.13470100 |
| C | 3.35019500  | -1.83412700 | -0.00415600 |
| O | 1.27948500  | -0.70649500 | 0.25008700  |
| H | 0.39387200  | 6.02673600  | 0.93800400  |
| H | 1.35505000  | 6.72989400  | -0.35582500 |
| C | 4.72642000  | -1.71753400 | -0.11736700 |
| H | 5.30839700  | -2.62813300 | -0.18147400 |
| C | -0.67609200 | -0.39029400 | 2.40688300  |
| C | 0.58564300  | -0.29346900 | 3.13752400  |
| O | -0.46940400 | 0.82582800  | 1.69507800  |
| H | -0.65535800 | -1.23134300 | 1.70404500  |
| H | 1.49380300  | -0.41921100 | 2.56173400  |
| H | 0.66402400  | -0.18266000 | 4.21321500  |
| C | -1.96837100 | -0.38106200 | 3.20197400  |
| H | -2.81236700 | -0.32005200 | 2.51124100  |
| H | -2.06417600 | -1.30010200 | 3.79004400  |
| H | -2.00758400 | 0.47943000  | 3.87820100  |
| C | -2.75510300 | -3.15662700 | -0.60138100 |
| C | -2.02486600 | -3.16128700 | -1.96505700 |
| H | -2.74105400 | -3.00727000 | -2.77910100 |
| H | -1.27092900 | -2.37551100 | -2.01441700 |
| H | -1.53236800 | -4.12723300 | -2.12401800 |
| C | -1.75406000 | -3.49642000 | 0.52447200  |
| H | -0.89135400 | -2.83657500 | 0.48452900  |
| H | -2.23006600 | -3.41242200 | 1.50875800  |
| H | -1.39839800 | -4.52641700 | 0.41052300  |
| C | -3.81458500 | -4.27261200 | -0.62897100 |
| H | -4.35244600 | -4.35431900 | 0.32222600  |
| H | -4.54735500 | -4.12382100 | -1.42857000 |
| H | -3.31945500 | -5.23117500 | -0.81156000 |
| C | 2.65762000  | -3.20475300 | 0.02338000  |
| C | 3.65769600  | -4.36431700 | -0.12970600 |
| H | 4.20355600  | -4.30840200 | -1.07699200 |
| H | 4.38619700  | -4.39469500 | 0.68799900  |
| H | 3.11112200  | -5.31246100 | -0.11981200 |
| C | 1.93588500  | -3.39653600 | 1.37678500  |
| H | 2.65351900  | -3.35401800 | 2.20448900  |
| H | 1.18141800  | -2.62508800 | 1.52254900  |
| H | 1.43864700  | -4.37224100 | 1.40827700  |
| C | 1.64641300  | -3.29793000 | -1.14154900 |
| H | 1.12205500  | -4.25968800 | -1.10615300 |
| H | 0.91360100  | -2.49487600 | -1.09811900 |
| H | 2.16833400  | -3.23023000 | -2.10141900 |
| C | 6.95916200  | -0.50182100 | -0.29489100 |
| C | 7.54349700  | 0.91945400  | -0.32799200 |
| H | 7.16458100  | 1.49096500  | -1.18132800 |
| H | 7.31008800  | 1.47293500  | 0.58752300  |
| H | 8.63324700  | 0.87085300  | -0.41816500 |
| C | 7.57328500  | -1.24912800 | 0.90898000  |
| H | 7.21830600  | -2.28216000 | 0.96685700  |
| H | 8.66588600  | -1.27543900 | 0.82895700  |
| H | 7.31005500  | -0.75220100 | 1.84832000  |
| C | 7.35994900  | -1.22028300 | -1.60182500 |
| H | 7.00123000  | -2.25337300 | -1.62114100 |
| H | 6.93869200  | -0.70520800 | -2.47067300 |
| H | 8.45033100  | -1.24274900 | -1.70939900 |
| C | -6.94315500 | -0.32088600 | -0.03492400 |
| C | -7.47696400 | 1.11788600  | 0.05161400  |
| H | -7.06247800 | 1.65030100  | 0.91398300  |

|    |             |             |             |
|----|-------------|-------------|-------------|
| H  | -7.24129900 | 1.69049400  | -0.85121700 |
| H  | -8.56596000 | 1.10423300  | 0.16055300  |
| C  | -7.36009800 | -1.06966000 | 1.24982300  |
| H  | -8.45011600 | -1.06423500 | 1.36242900  |
| H  | -7.03116100 | -2.11273900 | 1.23341400  |
| H  | -6.92177800 | -0.59498100 | 2.13373300  |
| C  | -7.59178600 | -1.00457600 | -1.25846900 |
| H  | -7.27827400 | -2.04820100 | -1.35214600 |
| H  | -8.68417300 | -0.99040700 | -1.17261900 |
| H  | -7.31280000 | -0.48846300 | -2.18238300 |
| H  | 0.28242900  | 3.47920300  | 1.15998000  |
| H  | -0.14744700 | 3.20694600  | -1.82810700 |
| Cl | 0.51347700  | 0.54701500  | -2.38462100 |
| O  | 1.04819200  | 1.98802200  | 3.37965400  |
| H  | 0.49325200  | 2.35729900  | 4.08110900  |
| H  | 0.43127100  | 1.82766600  | 2.61429000  |

### III-t (PO-Co<sup>III</sup>-Cl + H<sub>2</sub>O)

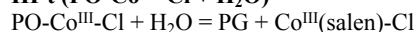

reactant complex

Charge: 0

Spin Multiplicity: 1

Sum of electronic and thermal Free Energies (a.u.): -2537.574122

Thermal correction to Gibbs Free Energy (a.u.): 0.852805

No imaginary frequency

|    |             |             |             |
|----|-------------|-------------|-------------|
| C  | -4.57375800 | -1.75367200 | -0.28524800 |
| C  | -5.26288400 | -0.51616300 | -0.22025400 |
| C  | -3.20512300 | -1.89269500 | -0.44438000 |
| H  | -5.16908900 | -2.65528000 | -0.21979000 |
| C  | -4.49939900 | 0.62009000  | -0.37305400 |
| C  | -2.40192000 | -0.69549900 | -0.48633700 |
| C  | -3.08951900 | 0.55886400  | -0.50752900 |
| H  | -4.96253300 | 1.60194900  | -0.39623400 |
| O  | -1.10605400 | -0.80069700 | -0.50470500 |
| C  | -2.40353000 | 1.80067500  | -0.70139000 |
| Co | 0.13147300  | 0.61386500  | -0.26334400 |
| N  | -1.12511300 | 1.96974600  | -0.69090900 |
| H  | -3.03887600 | 2.67208500  | -0.85668900 |
| N  | 1.32939700  | 2.04264200  | 0.10639600  |
| C  | -0.48021000 | 3.27154800  | -0.88392900 |
| C  | 2.61345300  | 1.91539400  | 0.19531200  |
| C  | 0.63291000  | 3.33209800  | 0.17947600  |
| C  | -1.38529800 | 4.49949900  | -0.79341600 |
| H  | 3.21559400  | 2.81786600  | 0.30607600  |
| C  | 3.33807900  | 0.68338400  | 0.15222000  |
| C  | 1.48214500  | 4.59213900  | 0.02332100  |
| C  | -0.54831800 | 5.77945800  | -0.93546100 |
| H  | -1.90788300 | 4.48457900  | 0.17178700  |
| H  | -2.14458100 | 4.47088400  | -1.58234300 |
| C  | 4.74988000  | 0.76556500  | 0.09628600  |
| C  | 2.67614800  | -0.58164100 | 0.19002800  |
| C  | 0.58369000  | 5.83619900  | 0.09692500  |
| H  | 2.24519800  | 4.64304600  | 0.80749500  |
| H  | 2.00509400  | 4.55858900  | -0.94129400 |
| H  | -1.19545600 | 6.65698700  | -0.83483300 |
| H  | -0.11948200 | 5.81843500  | -1.94558700 |
| C  | 5.53654500  | -0.36482800 | 0.05024100  |
| H  | 5.19558900  | 1.75471500  | 0.07770800  |
| C  | 3.48611700  | -1.76507500 | 0.13367100  |
| O  | 1.37695600  | -0.68593200 | 0.31950200  |
| H  | 0.15204300  | 5.90702900  | 1.10404000  |
| H  | 1.18843000  | 6.73710200  | -0.05052000 |
| C  | 4.86180300  | -1.60966000 | 0.06857100  |
| H  | 5.46987600  | -2.50387300 | 0.02026400  |
| C  | -0.79809200 | -0.47369700 | 2.43509500  |
| C  | 0.25673800  | 0.46621600  | 2.83082100  |
| O  | -0.56734600 | 0.75872900  | 1.66338400  |
| H  | -0.47235500 | -1.33855300 | 1.87016900  |
| H  | 1.28461900  | 0.23112700  | 2.57760500  |
| H  | 0.08517200  | 1.16454200  | 3.64591200  |

|    |             |             |             |
|----|-------------|-------------|-------------|
| C  | -2.14038800 | -0.55447900 | 3.10015400  |
| H  | -2.89499600 | -0.86861600 | 2.37302200  |
| H  | -2.10837900 | -1.30123400 | 3.90012400  |
| H  | -2.43129900 | 0.41179200  | 3.51960000  |
| C  | -2.55004000 | -3.27311100 | -0.61092900 |
| C  | -1.83224200 | -3.32156900 | -1.98028900 |
| H  | -2.55674700 | -3.20658100 | -2.79344700 |
| H  | -1.08617400 | -2.53158500 | -2.06531700 |
| H  | -1.33143400 | -4.28798000 | -2.10602200 |
| C  | -1.53190200 | -3.54188100 | 0.51812600  |
| H  | -0.70435000 | -2.83943000 | 0.46353700  |
| H  | -2.01139000 | -3.46518700 | 1.50122200  |
| H  | -1.12553700 | -4.55459100 | 0.42253200  |
| C  | -3.58680200 | -4.40987400 | -0.58126500 |
| H  | -4.10984800 | -4.46650100 | 0.37986400  |
| H  | -4.33322200 | -4.30597800 | -1.37545000 |
| H  | -3.07468000 | -5.36469300 | -0.73365500 |
| C  | 2.83142600  | -3.15411900 | 0.13357500  |
| C  | 3.86691200  | -4.28463400 | -0.00107000 |
| H  | 4.43422700  | -4.20899200 | -0.93443600 |
| H  | 4.57508600  | -4.30034600 | 0.83454400  |
| H  | 3.34626600  | -5.24722500 | -0.00893100 |
| C  | 2.08418800  | -3.37067700 | 1.46873200  |
| H  | 2.78798300  | -3.35280200 | 2.30854000  |
| H  | 1.33741200  | -2.59437300 | 1.62669700  |
| H  | 1.57929400  | -4.34286400 | 1.46852800  |
| C  | 1.85685100  | -3.26808700 | -1.06071100 |
| H  | 1.36479700  | -4.24718000 | -1.04840000 |
| H  | 1.09567500  | -2.49142400 | -1.03352900 |
| H  | 2.40347800  | -3.17440000 | -2.00459400 |
| C  | 7.06668100  | -0.33515300 | -0.02707500 |
| C  | 7.61473400  | 1.10087500  | -0.03248300 |
| H  | 7.25119300  | 1.66784000  | -0.89550500 |
| H  | 7.33626500  | 1.64262400  | 0.87747600  |
| H  | 8.70772900  | 1.08059200  | -0.08518500 |
| C  | 7.65831400  | -1.07446900 | 1.19283400  |
| H  | 7.32889200  | -2.11670700 | 1.23278600  |
| H  | 8.75316600  | -1.07180000 | 1.14952100  |
| H  | 7.35092100  | -0.59086900 | 2.12565800  |
| C  | 7.52894800  | -1.03466400 | -1.32395800 |
| H  | 7.19858000  | -2.07663500 | -1.36104900 |
| H  | 7.12388500  | -0.52505500 | -2.20367000 |
| H  | 8.62242400  | -1.02793400 | -1.39472100 |
| C  | -6.78157700 | -0.50419900 | -0.02059600 |
| C  | -7.34464300 | 0.92536000  | 0.01983200  |
| H  | -6.90808000 | 1.50818300  | 0.83769900  |
| H  | -7.16071500 | 1.45859000  | -0.91842300 |
| H  | -8.42731800 | 0.89393100  | 0.17607600  |
| C  | -7.12466300 | -1.19789100 | 1.31596200  |
| H  | -8.20845300 | -1.21050100 | 1.47622300  |
| H  | -6.77208200 | -2.23318900 | 1.33544900  |
| H  | -6.66066200 | -0.67078100 | 2.15606900  |
| C  | -7.46432300 | -1.26136100 | -1.18052500 |
| H  | -7.13071700 | -2.30144800 | -1.23704400 |
| H  | -8.55194500 | -1.26660900 | -1.04796700 |
| H  | -7.23732000 | -0.78546400 | -2.13956300 |
| H  | 0.13124000  | 3.36740600  | 1.15801600  |
| H  | 0.00694600  | 3.23114200  | -1.86680800 |
| Cl | 0.80601000  | 0.51592500  | -2.38619100 |
| O  | -2.63397200 | 2.67223100  | 2.22388100  |
| H  | -3.40440400 | 2.21886000  | 1.85778700  |
| H  | -1.90124400 | 2.09075100  | 1.96191000  |

**III-t (PO-Co<sup>III</sup>-Cl + H<sub>2</sub>O)**

PO-Co<sup>III</sup>-Cl + H<sub>2</sub>O = PG + Co<sup>III</sup>(salen)-Cl

product complex

Charge: 0

Spin Multiplicity: 1

Sum of electronic and thermal Free Energies (a.u.): -2537.596742

Thermal correction to Gibbs Free Energy (a.u.): 0.856777

No imaginary frequency

|    |             |             |             |
|----|-------------|-------------|-------------|
| C  | -4.73642200 | -1.56672300 | -0.29720800 |
| C  | -5.39614800 | -0.32507900 | -0.11387400 |
| C  | -3.37454700 | -1.71978100 | -0.49095800 |
| H  | -5.35075200 | -2.45797900 | -0.29884400 |
| C  | -4.60984800 | 0.80346900  | -0.17544400 |
| C  | -2.54678300 | -0.53980700 | -0.45164000 |
| C  | -3.20526800 | 0.72621800  | -0.34519000 |
| H  | -5.04956400 | 1.79229800  | -0.09265500 |
| O  | -1.25517100 | -0.67208100 | -0.52269000 |
| C  | -2.49840100 | 1.96187300  | -0.48415700 |
| Co | 0.02355900  | 0.69595100  | -0.25603200 |
| N  | -1.21639600 | 2.10067500  | -0.54624700 |
| H  | -3.11949000 | 2.85532900  | -0.56437700 |
| N  | 1.27830700  | 2.08544700  | 0.11336500  |
| C  | -0.53718100 | 3.37272800  | -0.79030300 |
| C  | 2.56095900  | 1.91116600  | 0.16769500  |
| C  | 0.64261400  | 3.40778500  | 0.19879200  |
| C  | -1.37810200 | 4.64367200  | -0.69524200 |
| H  | 3.19506800  | 2.79037900  | 0.28573700  |
| C  | 3.24974600  | 0.66524000  | 0.06952600  |
| C  | 1.53585400  | 4.62288000  | -0.05187900 |
| C  | -0.49097700 | 5.87250300  | -0.94477300 |
| H  | -1.83882300 | 4.71039000  | 0.30009700  |
| H  | -2.19061300 | 4.61767100  | -1.42880300 |
| C  | 4.66496700  | 0.71777100  | 0.02414800  |
| C  | 2.55943400  | -0.58650300 | 0.02913600  |
| C  | 0.70306400  | 5.91233900  | 0.01628600  |
| H  | 2.34280900  | 4.66990400  | 0.68677700  |
| H  | 2.00205900  | 4.52427600  | -1.04047900 |
| H  | -1.08590400 | 6.78672300  | -0.84789500 |
| H  | -0.12358500 | 5.84354400  | -1.97877000 |
| C  | 5.42760300  | -0.42318000 | -0.08401600 |
| H  | 5.13190100  | 1.69636200  | 0.06742200  |
| C  | 3.34756100  | -1.78214700 | -0.10339700 |
| O  | 1.26411300  | -0.67866200 | 0.14791900  |
| H  | 0.33721900  | 6.04953500  | 1.04301600  |
| H  | 1.34080400  | 6.77437000  | -0.20543000 |
| C  | 4.72537200  | -1.65248700 | -0.14947200 |
| H  | 5.31505500  | -2.55445400 | -0.25203100 |
| C  | -0.62225400 | -0.51784900 | 2.42622900  |
| C  | 0.63041600  | -0.57062300 | 3.30339700  |
| O  | -0.55409100 | 0.72932900  | 1.68529900  |
| H  | -0.59003600 | -1.31351900 | 1.68599600  |
| H  | 1.50278400  | -0.74972900 | 2.67569900  |
| H  | 0.55457900  | -1.37199100 | 4.04812600  |
| C  | -1.94053800 | -0.55308700 | 3.18514000  |
| H  | -2.77241100 | -0.42908700 | 2.48827300  |
| H  | -2.05661300 | -1.51354900 | 3.69768700  |
| H  | -1.99863000 | 0.24917700  | 3.93084600  |
| C  | -2.75230900 | -3.09465900 | -0.78266300 |
| C  | -2.07048200 | -3.05098700 | -2.17040500 |
| H  | -2.81282200 | -2.86109500 | -2.95294000 |
| H  | -1.31185700 | -2.26953700 | -2.21438000 |
| H  | -1.59168200 | -4.01354200 | -2.38296300 |
| C  | -1.71016000 | -3.46776900 | 0.29346000  |
| H  | -0.86587200 | -2.78434100 | 0.26066000  |
| H  | -2.15744500 | -3.44355700 | 1.29430900  |
| H  | -1.33532900 | -4.48203700 | 0.11712500  |
| C  | -3.81053800 | -4.21150500 | -0.81156900 |
| H  | -4.31153400 | -4.33006200 | 0.15567500  |
| H  | -4.57371400 | -4.03486200 | -1.57647400 |
| H  | -3.32150800 | -5.16141600 | -1.04798500 |
| C  | 2.66464600  | -3.15457200 | -0.20284100 |
| C  | 3.67864600  | -4.29187200 | -0.41931600 |
| H  | 4.25252700  | -4.15606800 | -1.34177000 |
| H  | 4.38192200  | -4.38558100 | 0.41544000  |
| H  | 3.13937400  | -5.24048000 | -0.50296900 |
| C  | 1.90998100  | -3.45363500 | 1.11163000  |

|    |             |             |             |
|----|-------------|-------------|-------------|
| H  | 2.60559700  | -3.47401200 | 1.95838600  |
| H  | 1.15026000  | -2.69786800 | 1.30025800  |
| H  | 1.41651200  | -4.42993400 | 1.05275700  |
| C  | 1.68608900  | -3.16532300 | -1.39951500 |
| H  | 1.17672300  | -4.13409700 | -1.45546200 |
| H  | 0.93855900  | -2.37949400 | -1.31341900 |
| H  | 2.23223100  | -3.01397200 | -2.33618800 |
| C  | 6.95852400  | -0.42310500 | -0.14712900 |
| C  | 7.53772400  | 0.99788000  | -0.05861400 |
| H  | 7.19550000  | 1.62495800  | -0.88816900 |
| H  | 7.26109500  | 1.48833300  | 0.88048900  |
| H  | 8.63057700  | 0.95666500  | -0.10256600 |
| C  | 7.52230500  | -1.24929600 | 1.02949100  |
| H  | 7.16968500  | -2.28434100 | 1.00202900  |
| H  | 8.61741000  | -1.26860400 | 0.99562600  |
| H  | 7.21618700  | -0.81737800 | 1.98771100  |
| C  | 7.41854300  | -1.05112600 | -1.48086000 |
| H  | 7.06527000  | -2.08091900 | -1.58579800 |
| H  | 7.03386600  | -0.47870700 | -2.33060900 |
| H  | 8.51260700  | -1.06530400 | -1.54165900 |
| C  | -6.91217300 | -0.29915200 | 0.10571300  |
| C  | -7.44393300 | 1.13259300  | 0.27841800  |
| H  | -6.98579300 | 1.63145300  | 1.13876300  |
| H  | -7.25723700 | 1.74219500  | -0.61159700 |
| H  | -8.52567100 | 1.10999200  | 0.44374300  |
| C  | -7.25774900 | -1.10048200 | 1.37984700  |
| H  | -8.34013000 | -1.10496900 | 1.55097800  |
| H  | -6.92724500 | -2.14044900 | 1.30402700  |
| H  | -6.77364600 | -0.65932800 | 2.25721200  |
| C  | -7.62404100 | -0.93613600 | -1.10773400 |
| H  | -7.31352500 | -1.97368300 | -1.26023600 |
| H  | -8.71026700 | -0.93062300 | -0.96294900 |
| H  | -7.39654300 | -0.38197200 | -2.02371400 |
| H  | 0.20777900  | 3.50007100  | 1.20786000  |
| H  | -0.10869600 | 3.29315900  | -1.79782000 |
| Cl | 0.59191900  | 0.69974700  | -2.42385400 |
| O  | 0.85308400  | 0.70710900  | 3.92028900  |
| H  | 0.20507500  | 0.81771500  | 4.62883400  |
| H  | 0.03315500  | 1.30184100  | 2.21514800  |

### III-m (PO-Co<sup>III</sup>-Cl + H<sub>2</sub>O)

PO-Co<sup>III</sup>-Cl + H<sub>2</sub>O = PG + Co<sup>III</sup>(salen)-Cl

transition state

Charge: 0

Spin Multiplicity: 1

Sum of electronic and thermal Free Energies (a.u.): -2537.518112

Thermal correction to Gibbs Free Energy (a.u.): 0.849196

Imaginary frequencies: -269.22

|    |             |             |             |
|----|-------------|-------------|-------------|
| C  | -4.77079500 | -1.69983100 | -0.20308400 |
| C  | -5.44853500 | -0.45522600 | -0.20573400 |
| C  | -3.39710800 | -1.85263100 | -0.27408600 |
| H  | -5.37836200 | -2.59455200 | -0.15822600 |
| C  | -4.66484400 | 0.67239900  | -0.31813800 |
| C  | -2.58044100 | -0.66379300 | -0.30759500 |
| C  | -3.25218200 | 0.59916500  | -0.37317600 |
| H  | -5.11631300 | 1.65805100  | -0.37033600 |
| O  | -1.28733700 | -0.78551300 | -0.28833900 |
| C  | -2.55054800 | 1.83185200  | -0.56880800 |
| Co | -0.01823100 | 0.62040200  | -0.18659400 |
| N  | -1.27021300 | 1.98815600  | -0.58542700 |
| H  | -3.17981600 | 2.70667900  | -0.73974500 |
| N  | 1.24822100  | 2.03075000  | 0.00145800  |
| C  | -0.60584300 | 3.25676000  | -0.89101300 |
| C  | 2.52827200  | 1.87108700  | -0.00982100 |
| C  | 0.59697900  | 3.34280500  | 0.06754200  |
| C  | -1.46060700 | 4.52096400  | -0.82133100 |
| H  | 3.16202400  | 2.75851500  | 0.01264600  |
| C  | 3.22134500  | 0.61731700  | -0.06140900 |
| C  | 1.46473000  | 4.56186500  | -0.24399000 |

|   |             |             |             |
|---|-------------|-------------|-------------|
| C | -0.59767800 | 5.75501500  | -1.12311500 |
| H | -1.90353500 | 4.60910700  | 0.18032900  |
| H | -2.28586900 | 4.46526100  | -1.53871000 |
| C | 4.62528500  | 0.66863100  | -0.22384300 |
| C | 2.54080800  | -0.63259200 | 0.06595500  |
| C | 0.61465300  | 5.83998500  | -0.18854700 |
| H | 2.28971000  | 4.63946100  | 0.47204200  |
| H | 1.90635700  | 4.44553500  | -1.24216900 |
| H | -1.20547100 | 6.66230500  | -1.04045800 |
| H | -0.25045700 | 5.70211500  | -2.16324600 |
| C | 5.38975300  | -0.47709700 | -0.28456300 |
| H | 5.08465100  | 1.64794400  | -0.31096700 |
| C | 3.32876000  | -1.83240200 | -0.00065300 |
| O | 1.25569800  | -0.70919500 | 0.29569700  |
| H | 0.26834500  | 5.99569700  | 0.84209400  |
| H | 1.23264400  | 6.70664900  | -0.44588100 |
| C | 4.69858300  | -1.70676500 | -0.16971200 |
| H | 5.28701900  | -2.61366200 | -0.22572300 |
| C | -2.74860700 | -3.24192900 | -0.38196800 |
| C | -2.01732800 | -3.33738600 | -1.74177900 |
| H | -2.73633600 | -3.25646800 | -2.56389700 |
| H | -1.27702600 | -2.54510500 | -1.85121100 |
| H | -1.50875400 | -4.30409800 | -1.82895100 |
| C | -1.74835400 | -3.48185600 | 0.76990700  |
| H | -0.91356900 | -2.78914000 | 0.70578000  |
| H | -2.24133600 | -3.36354700 | 1.74228100  |
| H | -1.35333800 | -4.50229100 | 0.71491200  |
| C | -3.79201200 | -4.37211800 | -0.32862300 |
| H | -4.33966200 | -4.38302500 | 0.62043300  |
| H | -4.51768600 | -4.30122900 | -1.14527300 |
| H | -3.28132400 | -5.33496500 | -0.42671900 |
| C | 2.65620300  | -3.20892200 | 0.10486200  |
| C | 3.66096000  | -4.36250500 | -0.06228000 |
| H | 4.15843800  | -4.33084500 | -1.03699300 |
| H | 4.42933700  | -4.36085300 | 0.71867400  |
| H | 3.12612700  | -5.31507000 | 0.00420100  |
| C | 2.00811400  | -3.36154500 | 1.49931400  |
| H | 2.77075400  | -3.30739100 | 2.28500100  |
| H | 1.27334000  | -2.57690500 | 1.67128400  |
| H | 1.50378900  | -4.33069900 | 1.58053700  |
| C | 1.58959300  | -3.35101600 | -1.00350900 |
| H | 1.08401500  | -4.31916200 | -0.91386200 |
| H | 0.84689900  | -2.55866000 | -0.94525700 |
| H | 2.06060100  | -3.30280300 | -1.99051300 |
| C | 6.91034000  | -0.47811600 | -0.47375800 |
| C | 7.47907100  | 0.94633800  | -0.57414800 |
| H | 7.06154300  | 1.48743600  | -1.42925000 |
| H | 7.27638200  | 1.52660600  | 0.33212000  |
| H | 8.56487300  | 0.90419800  | -0.70558600 |
| C | 7.57890600  | -1.18219600 | 0.72719800  |
| H | 7.23621700  | -2.21570400 | 0.83147400  |
| H | 8.66763600  | -1.20200100 | 0.60429700  |
| H | 7.34891000  | -0.65801600 | 1.66051600  |
| C | 7.26590400  | -1.23377200 | -1.77279900 |
| H | 6.91648300  | -2.26984300 | -1.74565700 |
| H | 6.80540700  | -0.74967900 | -2.63950400 |
| H | 8.35131800  | -1.25038200 | -1.92312000 |
| C | -6.97790400 | -0.42634500 | -0.11951400 |
| C | -7.52906100 | 1.00836300  | -0.14073500 |
| H | -7.14969500 | 1.59824600  | 0.70017300  |
| H | -7.26847000 | 1.52678400  | -1.06907800 |
| H | -8.62097800 | 0.98820000  | -0.06754300 |
| C | -7.43049800 | -1.09882100 | 1.19498600  |
| H | -8.52374100 | -1.09978900 | 1.27073100  |
| H | -7.09063300 | -2.13675000 | 1.25481600  |
| H | -7.02729000 | -0.56481200 | 2.06158600  |
| C | -7.57868900 | -1.19250500 | -1.31845700 |
| H | -7.25152900 | -2.23596100 | -1.33639200 |
| H | -8.67345500 | -1.18633800 | -1.26936100 |

|    |             |             |             |
|----|-------------|-------------|-------------|
| H  | -7.27416300 | -0.73145900 | -2.26317900 |
| H  | 0.19980100  | 3.44793500  | 1.08739100  |
| H  | -0.20045800 | 3.14236400  | -1.90533600 |
| Cl | 0.47503700  | 0.42970600  | -2.38756700 |
| O  | -0.40570700 | 2.55177600  | 3.56482200  |
| H  | -1.28599400 | 2.79320600  | 3.88230100  |
| H  | -0.55562100 | 2.11793700  | 2.67933600  |
| C  | 0.16614400  | 0.12952800  | 3.55987900  |
| C  | -0.70504700 | -0.28077900 | 2.44731200  |
| O  | -0.57360700 | 0.86892700  | 1.65021600  |
| H  | -0.24190500 | 0.30388800  | 4.55272600  |
| H  | -1.74438500 | -0.47589300 | 2.73949000  |
| H  | -0.30629400 | -1.16683900 | 1.93362200  |
| C  | 1.61431500  | 0.29381600  | 3.39712000  |
| H  | 1.91499800  | 1.29499600  | 3.72628200  |
| H  | 2.10020100  | -0.40807800 | 4.09502800  |
| H  | 1.93797800  | 0.10228900  | 2.37801100  |

### III-m (PO-Co<sup>III</sup>-Cl + H<sub>2</sub>O)

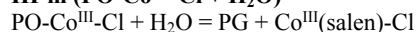

reactant complex

Charge: 0

Spin Multiplicity: 1

Sum of electronic and thermal Free Energies (a.u.): -2537.569216

Thermal correction to Gibbs Free Energy (a.u.): 0.850765

No imaginary frequency

|    |             |             |             |
|----|-------------|-------------|-------------|
| C  | -4.65449400 | -1.80168900 | -0.19800100 |
| C  | -5.35282800 | -0.56823800 | -0.24300200 |
| C  | -3.27941600 | -1.93808200 | -0.27616500 |
| H  | -5.24747800 | -2.70298600 | -0.11023400 |
| C  | -4.58807700 | 0.56435700  | -0.41110200 |
| C  | -2.48091400 | -0.73996600 | -0.35885900 |
| C  | -3.17232100 | 0.50679200  | -0.47348400 |
| H  | -5.05326800 | 1.54078400  | -0.50567600 |
| O  | -1.18449800 | -0.83910200 | -0.33059400 |
| C  | -2.48696000 | 1.74379500  | -0.68910600 |
| Co | 0.05943400  | 0.57987800  | -0.21510500 |
| N  | -1.20924400 | 1.92263300  | -0.65699900 |
| H  | -3.12352200 | 2.60654000  | -0.88137900 |
| N  | 1.27320400  | 2.01619700  | 0.04537400  |
| C  | -0.57503200 | 3.22376500  | -0.89114600 |
| C  | 2.56030100  | 1.89247900  | 0.05247000  |
| C  | 0.57586400  | 3.30247100  | 0.12901800  |
| C  | -1.48276900 | 4.44909800  | -0.78260800 |
| H  | 3.16706500  | 2.79763300  | 0.09669000  |
| C  | 3.28055200  | 0.65863200  | 0.01095900  |
| C  | 1.41168000  | 4.56530700  | -0.06723900 |
| C  | -0.65891900 | 5.73340300  | -0.95810300 |
| H  | -1.98038100 | 4.43592900  | 0.19583100  |
| H  | -2.26392900 | 4.41298600  | -1.54926300 |
| C  | 4.68691600  | 0.73733300  | -0.12770100 |
| C  | 2.62248500  | -0.60372200 | 0.13998800  |
| C  | 0.50837200  | 5.80385700  | 0.03336900  |
| H  | 2.20459700  | 4.62353300  | 0.68646000  |
| H  | 1.89730600  | 4.53035200  | -1.05111800 |
| H  | -1.30811500 | 6.60721700  | -0.83995300 |
| H  | -0.26515300 | 5.77014500  | -1.98251600 |
| C  | 5.47235300  | -0.39377800 | -0.16526600 |
| H  | 5.12862200  | 1.72462600  | -0.21475400 |
| C  | 3.43291000  | -1.78856000 | 0.09675600  |
| O  | 1.33351600  | -0.70247700 | 0.34641900  |
| H  | 0.11245800  | 5.87659600  | 1.05500900  |
| H  | 1.10074300  | 6.70837400  | -0.13978300 |
| C  | 4.80227100  | -1.63611800 | -0.05115400 |
| H  | 5.40922400  | -2.53149000 | -0.09002300 |
| C  | -2.60945300 | -3.32004300 | -0.32655300 |
| C  | -1.87085700 | -3.45871900 | -1.67852500 |
| H  | -2.58643100 | -3.41899100 | -2.50662800 |
| H  | -1.13914300 | -2.66269800 | -1.81448600 |
| H  | -1.34991200 | -4.42149400 | -1.72542400 |

|    |             |             |             |
|----|-------------|-------------|-------------|
| C  | -1.61000300 | -3.49392700 | 0.83789400  |
| H  | -0.79723800 | -2.77687200 | 0.75760600  |
| H  | -2.11399100 | -3.36283100 | 1.80301700  |
| H  | -1.18388100 | -4.50289500 | 0.81678300  |
| C  | -3.63516200 | -4.46325800 | -0.23106800 |
| H  | -4.18412300 | -4.44624300 | 0.71703000  |
| H  | -4.36028900 | -4.43511300 | -1.05085900 |
| H  | -3.10939900 | -5.42103200 | -0.29081300 |
| C  | 2.78588800  | -3.17758100 | 0.19870100  |
| C  | 3.81808400  | -4.31111300 | 0.06470600  |
| H  | 4.33584200  | -4.27939100 | -0.89947500 |
| H  | 4.56873000  | -4.28530400 | 0.86216600  |
| H  | 3.30186000  | -5.27386600 | 0.12995300  |
| C  | 2.10810100  | -3.33168800 | 1.57832100  |
| H  | 2.84863500  | -3.25283300 | 2.38223500  |
| H  | 1.35267300  | -2.56168700 | 1.72454500  |
| H  | 1.62296400  | -4.31075000 | 1.65620900  |
| C  | 1.74883700  | -3.35026600 | -0.93330900 |
| H  | 1.26358200  | -4.32907900 | -0.84850600 |
| H  | 0.98601300  | -2.57584200 | -0.89661300 |
| H  | 2.24096100  | -3.29788300 | -1.90984400 |
| C  | 6.99578800  | -0.36849500 | -0.32757700 |
| C  | 7.53968400  | 1.06539000  | -0.43079100 |
| H  | 7.12773700  | 1.59135300  | -1.29801500 |
| H  | 7.31075100  | 1.64947000  | 0.46671700  |
| H  | 8.62813500  | 1.04211000  | -0.54281300 |
| C  | 7.65477300  | -1.04962000 | 0.89173000  |
| H  | 7.33015500  | -2.08862200 | 0.99888200  |
| H  | 8.74562200  | -1.04954500 | 0.78852400  |
| H  | 7.39784800  | -0.52222400 | 1.81606200  |
| C  | 7.38776200  | -1.12891500 | -1.61328300 |
| H  | 7.05741600  | -2.17113700 | -1.58302900 |
| H  | 6.93449900  | -0.66098200 | -2.49263000 |
| H  | 8.47574000  | -1.12663400 | -1.74384500 |
| C  | -6.88114800 | -0.55836600 | -0.13764200 |
| C  | -7.45304900 | 0.86656100  | -0.20832600 |
| H  | -7.07181100 | 1.49532900  | 0.60317400  |
| H  | -7.21303300 | 1.35129700  | -1.16010500 |
| H  | -8.54328200 | 0.83422100  | -0.11870600 |
| C  | -7.30586000 | -1.18427200 | 1.20870600  |
| H  | -8.39770300 | -1.19801700 | 1.29922800  |
| H  | -6.94989600 | -2.21399200 | 1.30548900  |
| H  | -6.90023700 | -0.61014600 | 2.04815000  |
| C  | -7.48523900 | -1.38043100 | -1.29713000 |
| H  | -7.14321900 | -2.41910700 | -1.27775400 |
| H  | -8.57909600 | -1.38787900 | -1.23343400 |
| H  | -7.20004800 | -0.95317200 | -2.26350700 |
| H  | 0.11025400  | 3.34391000  | 1.12556300  |
| H  | -0.12317300 | 3.17486900  | -1.89076100 |
| Cl | 0.63098000  | 0.39227500  | -2.35811100 |
| O  | -2.81496600 | 2.55115100  | 2.22240600  |
| H  | -3.62363000 | 2.10077500  | 1.94738900  |
| H  | -2.11457200 | 1.97104000  | 1.88106100  |
| C  | -0.06565900 | 0.81987000  | 3.08447100  |
| C  | -0.79116900 | -0.36104600 | 2.59748800  |
| O  | -0.65193700 | 0.79774600  | 1.73543700  |
| H  | -0.62603500 | 1.51573500  | 3.70734300  |
| H  | -1.81758600 | -0.54673100 | 2.90017800  |
| H  | -0.22410100 | -1.21411800 | 2.24489000  |
| C  | 1.42852500  | 0.86181600  | 3.20718600  |
| H  | 1.80700000  | 1.86444400  | 2.99084900  |
| H  | 1.70416700  | 0.61239700  | 4.23745000  |
| H  | 1.89614500  | 0.15197500  | 2.52747400  |

### III-m (PO-Co<sup>III</sup>-Cl + H<sub>2</sub>O)

PO-Co<sup>III</sup>-Cl + H<sub>2</sub>O = PG + Co<sup>III</sup>(salen)-Cl

product complex

Charge: 0

Spin Multiplicity: 1

Sum of electronic and thermal Free Energies (a.u.): -2537.592768



Thermal correction to Gibbs Free Energy (a.u.): 0.856872

No imaginary frequency

|    |             |             |             |
|----|-------------|-------------|-------------|
| C  | -4.80464400 | -1.62796100 | -0.21139900 |
| C  | -5.47855900 | -0.38244100 | -0.13214100 |
| C  | -3.43594800 | -1.78194400 | -0.34029300 |
| H  | -5.41354200 | -2.52256900 | -0.18280200 |
| C  | -4.69579600 | 0.74585800  | -0.21896900 |
| C  | -2.61555600 | -0.59544400 | -0.35282900 |
| C  | -3.28435200 | 0.67015300  | -0.33001400 |
| H  | -5.14319200 | 1.73468500  | -0.20585900 |
| O  | -1.32350400 | -0.72357400 | -0.40093500 |
| C  | -2.58325300 | 1.90313200  | -0.49798500 |
| Co | -0.05067000 | 0.66046000  | -0.22975200 |
| N  | -1.30007400 | 2.05351200  | -0.53761100 |
| H  | -3.20910900 | 2.78821500  | -0.62212000 |
| N  | 1.21321700  | 2.06441100  | 0.04557500  |
| C  | -0.63279100 | 3.32229600  | -0.83103700 |
| C  | 2.49786000  | 1.89849300  | 0.03133300  |
| C  | 0.57589800  | 3.38499900  | 0.12086900  |
| C  | -1.47714500 | 4.59173400  | -0.73860900 |
| H  | 3.13231200  | 2.78364200  | 0.08596600  |
| C  | 3.18683100  | 0.65205400  | -0.05992400 |
| C  | 1.45417500  | 4.59947800  | -0.17980900 |
| C  | -0.60482400 | 5.82077300  | -1.03458500 |
| H  | -1.91285800 | 4.67371300  | 0.26683600  |
| H  | -2.30807700 | 4.54938500  | -1.45021100 |
| C  | 4.59772900  | 0.70899300  | -0.17580900 |
| C  | 2.50097700  | -0.60256800 | -0.01399200 |
| C  | 0.61611500  | 5.88525300  | -0.10939000 |
| H  | 2.28336400  | 4.66322000  | 0.53255600  |
| H  | 1.88987400  | 4.48609600  | -1.18066300 |
| H  | -1.20272100 | 6.73298600  | -0.93715300 |
| H  | -0.26683300 | 5.77552000  | -2.07799800 |
| C  | 5.36112800  | -0.43216000 | -0.27291800 |
| H  | 5.06009900  | 1.69056500  | -0.19418300 |
| C  | 3.28937600  | -1.79891300 | -0.14205400 |
| O  | 1.21527100  | -0.69134700 | 0.18288700  |
| H  | 0.27977000  | 6.03853700  | 0.92508300  |
| H  | 1.24160500  | 6.74684200  | -0.36500900 |
| C  | 4.66282300  | -1.66517300 | -0.25850900 |
| H  | 5.25199400  | -2.56796900 | -0.35594600 |
| C  | -2.79537600 | -3.16733500 | -0.51770100 |
| C  | -2.10439900 | -3.22031500 | -1.90043200 |
| H  | -2.84567300 | -3.10637100 | -2.69862700 |
| H  | -1.36113000 | -2.43002300 | -2.00278300 |
| H  | -1.60592200 | -4.18685400 | -2.03522300 |
| C  | -1.76168100 | -3.44144200 | 0.59623200  |
| H  | -0.94212600 | -2.72990500 | 0.54126200  |
| H  | -2.23115300 | -3.37375400 | 1.58482300  |
| H  | -1.35163900 | -4.45144600 | 0.48612000  |
| C  | -3.83868300 | -4.29750400 | -0.46967300 |
| H  | -4.35761400 | -4.33830900 | 0.49450500  |
| H  | -4.58846200 | -4.19965300 | -1.26155000 |
| H  | -3.33300100 | -5.25726200 | -0.61356200 |
| C  | 2.61441100  | -3.17877700 | -0.16479100 |
| C  | 3.62345500  | -4.31483000 | -0.40983200 |
| H  | 4.14378000  | -4.19816000 | -1.36602700 |
| H  | 4.37291900  | -4.38446000 | 0.38619800  |
| H  | 3.08714300  | -5.26830700 | -0.44002400 |
| C  | 1.93828500  | -3.44895200 | 1.19697800  |
| H  | 2.68262900  | -3.45632900 | 2.00169900  |
| H  | 1.19324000  | -2.68649700 | 1.41496500  |
| H  | 1.43865300  | -4.42379700 | 1.18767100  |
| C  | 1.56878000  | -3.22811900 | -1.30132100 |
| H  | 1.06782300  | -4.20271600 | -1.30424300 |
| H  | 0.81925200  | -2.44815200 | -1.18842000 |
| H  | 2.05686900  | -3.09346000 | -2.27195300 |
| C  | 6.88745300  | -0.42913000 | -0.40596800 |
| C  | 7.46250400  | 0.99624100  | -0.39716100 |

|    |             |             |             |
|----|-------------|-------------|-------------|
| H  | 7.08010100  | 1.59022900  | -1.23347000 |
| H  | 7.22552200  | 1.52086900  | 0.53431200  |
| H  | 8.55249400  | 0.95748700  | -0.48856100 |
| C  | 7.50814800  | -1.20848500 | 0.77395400  |
| H  | 7.15966600  | -2.24492900 | 0.80153900  |
| H  | 8.60065800  | -1.22561300 | 0.69109700  |
| H  | 7.24371700  | -0.74165200 | 1.72823700  |
| C  | 7.28980700  | -1.10541700 | -1.73474900 |
| H  | 6.93787300  | -2.13978800 | -1.78456700 |
| H  | 6.86367600  | -0.56708100 | -2.58699000 |
| H  | 8.38003600  | -1.11758800 | -1.84486600 |
| C  | -7.00368700 | -0.35577600 | 0.01132200  |
| C  | -7.55053200 | 1.07922400  | 0.07587900  |
| H  | -7.13925000 | 1.62911200  | 0.92878800  |
| H  | -7.32150100 | 1.63931100  | -0.83649500 |
| H  | -8.63918900 | 1.05764600  | 0.18723900  |
| C  | -7.41009500 | -1.08707000 | 1.30936900  |
| H  | -8.49984100 | -1.08997300 | 1.42509300  |
| H  | -7.07155300 | -2.12719000 | 1.30924900  |
| H  | -6.97365000 | -0.59393600 | 2.18401100  |
| C  | -7.65009300 | -1.06538700 | -1.19856600 |
| H  | -7.32589400 | -2.10703000 | -1.27689000 |
| H  | -8.74229000 | -1.06130100 | -1.10879000 |
| H  | -7.37987700 | -0.56123800 | -2.13168100 |
| H  | 0.17369400  | 3.49856000  | 1.14178800  |
| H  | -0.23298700 | 3.22327200  | -1.84887100 |
| Cl | 0.44363700  | 0.58620700  | -2.41151300 |
| O  | 0.12701500  | 1.26542700  | 4.19517100  |
| H  | -0.72300200 | 1.23728200  | 4.65608000  |
| H  | -0.32695900 | 1.50262700  | 2.24482300  |
| C  | 0.43216300  | -0.06753100 | 3.72955100  |
| C  | -0.53487400 | -0.39869900 | 2.58897600  |
| O  | -0.62527500 | 0.74019500  | 1.71682400  |
| H  | 0.28026200  | -0.79434100 | 4.53939500  |
| H  | -1.54154700 | -0.60499900 | 2.97319000  |
| H  | -0.19979500 | -1.24373400 | 1.99302800  |
| C  | 1.89429200  | -0.05330600 | 3.31687000  |
| H  | 2.51663600  | 0.22743500  | 4.17002400  |
| H  | 2.20029300  | -1.03664600 | 2.95558700  |
| H  | 2.06109200  | 0.66280700  | 2.51084800  |

**PO + H<sub>2</sub>O-Co<sup>III</sup>-OH terminal carbon**

PO + H<sub>2</sub>O-Co<sup>III</sup>-OH = PO-OH-Co<sup>III</sup>-H<sub>2</sub>O

transition state

Charge: 0

Spin Multiplicity: 1

Sum of electronic and thermal Free Energies (a.u.): -2153.099432

Thermal correction to Gibbs Free Energy (a.u.): 0.862267

Imaginary frequencies: -482.08

|    |             |             |             |
|----|-------------|-------------|-------------|
| C  | 4.70849400  | -1.60823400 | -0.33529400 |
| C  | 5.38935300  | -0.36673900 | -0.30058600 |
| C  | 3.33136400  | -1.75911700 | -0.33446800 |
| H  | 5.31443100  | -2.50467600 | -0.35065600 |
| C  | 4.60602000  | 0.76377200  | -0.25050100 |
| C  | 2.52329300  | -0.57099800 | -0.32607900 |
| C  | 3.19029200  | 0.69081100  | -0.26405400 |
| H  | 5.05595900  | 1.74925500  | -0.19380100 |
| O  | 1.21763300  | -0.68477500 | -0.37828300 |
| C  | 2.48241100  | 1.92807400  | -0.14931800 |
| Co | -0.06858000 | 0.70742100  | -0.48690700 |
| N  | 1.19917800  | 2.08741100  | -0.19131200 |
| H  | 3.10509100  | 2.80956900  | 0.00466400  |
| N  | -1.33457800 | 2.10837700  | -0.71595100 |
| C  | 0.54017900  | 3.37403200  | 0.06139300  |
| C  | -2.61397500 | 1.96275800  | -0.62060300 |
| C  | -0.67681900 | 3.41037000  | -0.87915300 |
| C  | 1.39880900  | 4.63002000  | -0.08502300 |
| H  | -3.24150900 | 2.85409500  | -0.64872800 |
| C  | -3.31104600 | 0.71710800  | -0.48276900 |

|   |             |             |             |
|---|-------------|-------------|-------------|
| C | -1.53241500 | 4.65325400  | -0.63843500 |
| C | 0.54337700  | 5.88444700  | 0.14595000  |
| H | 1.83887400  | 4.65362900  | -1.09104300 |
| H | 2.22483700  | 4.61411600  | 0.63296400  |
| C | -4.70223300 | 0.78053300  | -0.23728400 |
| C | -2.64995700 | -0.53718300 | -0.62429300 |
| C | -0.67433500 | 5.91897200  | -0.78423100 |
| H | -2.36658100 | 4.68817700  | -1.34725500 |
| H | -1.96193200 | 4.60759400  | 0.37095800  |
| H | 1.15660000  | 6.77997600  | 0.00296800  |
| H | 0.20385300  | 5.89975200  | 1.18982000  |
| C | -5.46438600 | -0.36183800 | -0.10722900 |
| H | -5.15307300 | 1.76291700  | -0.14463900 |
| C | -3.42843600 | -1.73149300 | -0.49494700 |
| O | -1.36154300 | -0.62354900 | -0.89661900 |
| H | -0.33546500 | 6.00648900  | -1.82517400 |
| H | -1.28531500 | 6.80369400  | -0.57815200 |
| C | -4.78713000 | -1.59540000 | -0.24384600 |
| H | -5.37456200 | -2.49804200 | -0.13844900 |
| O | 0.27289800  | 0.61538700  | -2.54145400 |
| H | 1.01843200  | -0.00805300 | -2.51544600 |
| H | -0.50667900 | 0.03800500  | -2.65249800 |
| C | -2.76851600 | -3.11439600 | -0.61564300 |
| C | -3.77579100 | -4.25691400 | -0.39616900 |
| H | -3.25475900 | -5.21484100 | -0.48512900 |
| H | -4.22698700 | -4.21886000 | 0.60072000  |
| H | -4.57881100 | -4.24855800 | -1.14079400 |
| C | -2.16753700 | -3.28776000 | -2.02861300 |
| H | -2.95109600 | -3.22039600 | -2.79121700 |
| H | -1.41566400 | -2.52522700 | -2.23005100 |
| H | -1.69119800 | -4.27020600 | -2.11665100 |
| C | -1.65969900 | -3.25577200 | 0.45014200  |
| H | -0.87674700 | -2.51536500 | 0.30079000  |
| H | -2.07284400 | -3.13783700 | 1.45768500  |
| H | -1.20346600 | -4.24947900 | 0.38880100  |
| C | -6.97049400 | -0.35218100 | 0.17628600  |
| C | -7.71386900 | -1.07321900 | -0.96923400 |
| H | -7.38567400 | -2.11123800 | -1.07495500 |
| H | -8.79266100 | -1.08243400 | -0.77895200 |
| H | -7.53859600 | -0.56798400 | -1.92438500 |
| C | -7.24545700 | -1.08443800 | 1.50784200  |
| H | -8.31915700 | -1.09290800 | 1.72519100  |
| H | -6.90362500 | -2.12295700 | 1.47681100  |
| H | -6.73119100 | -0.58814600 | 2.33666400  |
| C | -7.52547600 | 1.07688000  | 0.28760000  |
| H | -7.05362900 | 1.63078000  | 1.10556800  |
| H | -7.37985600 | 1.64042000  | -0.63988600 |
| H | -8.60057000 | 1.04175700  | 0.48840200  |
| C | 2.67556400  | -3.14801100 | -0.28432000 |
| C | 3.71539100  | -4.28125700 | -0.34322000 |
| H | 4.29688200  | -4.25757500 | -1.27132600 |
| H | 4.41003900  | -4.24736700 | 0.50200500  |
| H | 3.19729200  | -5.24409700 | -0.30175900 |
| C | 1.91474900  | -3.27933200 | 1.05473000  |
| H | 2.61243600  | -3.22042100 | 1.89606800  |
| H | 1.17572800  | -2.48797700 | 1.16912600  |
| H | 1.39787200  | -4.24369200 | 1.10647000  |
| C | 1.71014700  | -3.34745900 | -1.47501300 |
| H | 0.89479000  | -2.62749800 | -1.44816900 |
| H | 2.24774800  | -3.24497900 | -2.42521400 |
| H | 1.28090500  | -4.35472400 | -1.44153000 |
| C | 6.92134300  | -0.34381300 | -0.29465500 |
| C | 7.47392600  | 1.08970500  | -0.24891200 |
| H | 8.56794400  | 1.06505000  | -0.25199200 |
| H | 7.15266100  | 1.67438000  | -1.11730600 |
| H | 7.15712900  | 1.61535200  | 0.65755900  |
| C | 7.44141400  | -1.10352300 | 0.94529800  |
| H | 7.07826700  | -0.63698700 | 1.86604800  |
| H | 7.11323100  | -2.14689000 | 0.94833400  |

|   |             |             |             |
|---|-------------|-------------|-------------|
| H | 8.53680800  | -1.09861800 | 0.96506800  |
| C | 7.44924400  | -1.02711200 | -1.57483400 |
| H | 7.10132600  | -0.49908500 | -2.46853600 |
| H | 8.54474000  | -1.03045800 | -1.58326500 |
| H | 7.11269300  | -2.06539400 | -1.64764400 |
| C | 0.24778800  | 0.18895600  | 3.95932400  |
| C | 0.74303500  | 0.69007600  | 2.63285800  |
| O | 1.44268800  | 0.47522500  | 4.52108800  |
| H | -0.62300600 | 0.79279200  | 4.31238200  |
| H | 0.92903900  | 1.75567700  | 2.60898500  |
| H | 1.53040800  | 0.07848700  | 2.21009600  |
| C | -0.16135500 | -1.29104600 | 3.96206900  |
| H | -0.30765000 | -1.62625500 | 4.99406700  |
| H | -1.09917500 | -1.47064000 | 3.41315100  |
| H | 0.63533300  | -1.90035400 | 3.52189100  |
| O | -0.44500400 | 0.61434600  | 1.35198100  |
| H | -0.79931100 | -0.28201700 | 1.46552500  |
| H | -0.28793700 | 3.43617100  | -1.90751900 |
| H | 0.14987300  | 3.32495500  | 1.08837300  |

**PO + H<sub>2</sub>O-Co<sup>III</sup>-OH terminal carbon**

PO + H<sub>2</sub>O-Co<sup>III</sup>-OH = PO-OH-Co<sup>III</sup>-H<sub>2</sub>O

reactant complex

Charge: 0

Spin Multiplicity: 1

Sum of electronic and thermal Free Energies (a.u.): -2153.151190

Thermal correction to Gibbs Free Energy (a.u.): 0.860701

No imaginary frequency

|    |             |             |             |
|----|-------------|-------------|-------------|
| C  | 4.61966700  | -1.50237000 | -0.52447700 |
| C  | 5.29342900  | -0.26024000 | -0.44558600 |
| C  | 3.24398000  | -1.66316200 | -0.46649500 |
| H  | 5.22834100  | -2.39027200 | -0.63603800 |
| C  | 4.50399800  | 0.86153800  | -0.31354900 |
| C  | 2.42917100  | -0.48706500 | -0.31583800 |
| C  | 3.09190800  | 0.77795600  | -0.26025300 |
| H  | 4.94982300  | 1.84850100  | -0.24575000 |
| O  | 1.12840100  | -0.61278300 | -0.22669000 |
| C  | 2.37566700  | 2.00941600  | -0.08502600 |
| Co | -0.16605400 | 0.76987600  | -0.40637400 |
| N  | 1.09392700  | 2.15067200  | -0.10570100 |
| H  | 2.99367700  | 2.89189500  | 0.08689700  |
| N  | -1.43614700 | 2.15878700  | -0.65795600 |
| C  | 0.41183700  | 3.41198400  | 0.19577000  |
| C  | -2.71247700 | 1.99583300  | -0.55444800 |
| C  | -0.79128700 | 3.47058600  | -0.76535600 |
| C  | 1.25305700  | 4.68511300  | 0.12243700  |
| H  | -3.35090500 | 2.88019000  | -0.56186800 |
| C  | -3.39495800 | 0.74160800  | -0.42758500 |
| C  | -1.66427500 | 4.69434700  | -0.48956400 |
| C  | 0.37598700  | 5.91661900  | 0.39110700  |
| H  | 1.71148300  | 4.76287800  | -0.87285900 |
| H  | 2.06758000  | 4.64826000  | 0.85348900  |
| C  | -4.78418600 | 0.78997000  | -0.17170100 |
| C  | -2.72124500 | -0.50433500 | -0.58933900 |
| C  | -0.82098600 | 5.97547600  | -0.56452300 |
| H  | -2.48673400 | 4.74863700  | -1.21081700 |
| H  | -2.11074900 | 4.60083500  | 0.50905200  |
| H  | 0.97870800  | 6.82657500  | 0.30315300  |
| H  | 0.01179100  | 5.87882000  | 1.42619700  |
| C  | -5.53568300 | -0.35993700 | -0.04367700 |
| H  | -5.24316600 | 1.76778500  | -0.06833100 |
| C  | -3.48978500 | -1.70557400 | -0.45244000 |
| O  | -1.44440200 | -0.57043500 | -0.89464200 |
| H  | -0.45924600 | 6.11045500  | -1.59272200 |
| H  | -1.44753100 | 6.84401100  | -0.33633200 |
| C  | -4.84728500 | -1.58613800 | -0.19015500 |
| H  | -5.42467000 | -2.49543200 | -0.08328800 |
| O  | 0.18606000  | 0.65606000  | -2.48149900 |
| H  | 0.95309000  | 0.06292900  | -2.50431800 |
| H  | -0.58338800 | 0.05154700  | -2.52405200 |

|   |             |             |             |
|---|-------------|-------------|-------------|
| C | -2.81605000 | -3.08016100 | -0.57911200 |
| C | -3.80242400 | -4.23669800 | -0.33911400 |
| H | -3.26737900 | -5.18746500 | -0.42587000 |
| H | -4.24363900 | -4.19660500 | 0.66223000  |
| H | -4.61406100 | -4.24749900 | -1.07447100 |
| C | -2.23886700 | -3.25148000 | -2.00202000 |
| H | -3.03920300 | -3.20429600 | -2.74870400 |
| H | -1.50881900 | -2.47413800 | -2.22358600 |
| H | -1.74461500 | -4.22500500 | -2.09483000 |
| C | -1.68973200 | -3.19864100 | 0.47106700  |
| H | -0.94948300 | -2.41236200 | 0.33922900  |
| H | -2.10283500 | -3.12352600 | 1.48283800  |
| H | -1.19148300 | -4.17014200 | 0.38014800  |
| C | -7.04030900 | -0.36596200 | 0.24774600  |
| C | -7.78382000 | -1.08882200 | -0.89655400 |
| H | -7.44471900 | -2.12257500 | -1.00930300 |
| H | -8.86176100 | -1.11030400 | -0.70092600 |
| H | -7.61834500 | -0.57722900 | -1.85008400 |
| C | -7.30299500 | -1.10633800 | 1.57727200  |
| H | -8.37570100 | -1.12695200 | 1.80010500  |
| H | -6.94995400 | -2.14088800 | 1.53994400  |
| H | -6.78915300 | -0.60821300 | 2.40533900  |
| C | -7.60910400 | 1.05695100  | 0.36818900  |
| H | -7.13796700 | 1.61172900  | 1.18598100  |
| H | -7.47222400 | 1.62587600  | -0.55728500 |
| H | -8.68312500 | 1.01094800  | 0.57374800  |
| C | 2.59665000  | -3.05549000 | -0.53868700 |
| C | 3.63198100  | -4.16305500 | -0.80288400 |
| H | 4.16138700  | -4.01182300 | -1.74975100 |
| H | 4.37301300  | -4.23560200 | -0.00025000 |
| H | 3.11774200  | -5.12717500 | -0.86054800 |
| C | 1.91111900  | -3.36512900 | 0.81011500  |
| H | 2.65520500  | -3.40993000 | 1.61291800  |
| H | 1.17305600  | -2.60432100 | 1.05744900  |
| H | 1.40396400  | -4.33500800 | 0.76577600  |
| C | 1.56068700  | -3.10832300 | -1.68518800 |
| H | 0.75131000  | -2.40099600 | -1.51577300 |
| H | 2.04217900  | -2.88569100 | -2.64515600 |
| H | 1.12917000  | -4.11258000 | -1.75396000 |
| C | 6.82418900  | -0.22377300 | -0.50413800 |
| C | 7.36956200  | 1.20939700  | -0.39877700 |
| H | 8.46291100  | 1.19410400  | -0.44319400 |
| H | 7.01291100  | 1.83884100  | -1.22067400 |
| H | 7.08264800  | 1.68161300  | 0.54636100  |
| C | 7.40149900  | -1.04875700 | 0.66686000  |
| H | 7.07742400  | -0.63692000 | 1.62768300  |
| H | 7.07691300  | -2.09242900 | 0.62501000  |
| H | 8.49676900  | -1.03850400 | 0.64001400  |
| C | 7.30335100  | -0.82764700 | -1.84214800 |
| H | 6.91299400  | -0.25341300 | -2.68846500 |
| H | 8.39756400  | -0.81883400 | -1.89707900 |
| H | 6.97241800  | -1.86354000 | -1.96012000 |
| C | 1.11198400  | -0.33812400 | 3.83574200  |
| C | 2.35663600  | -0.19910700 | 3.06372400  |
| O | 2.39024700  | -0.36881700 | 4.48694400  |
| H | 0.54234100  | 0.57379600  | 4.02272800  |
| H | 2.66030900  | 0.78053300  | 2.69626000  |
| H | 2.72773300  | -1.03994900 | 2.48066000  |
| C | 0.31081400  | -1.61534200 | 3.84631400  |
| H | -0.14194300 | -1.77700800 | 4.83022600  |
| H | -0.49614600 | -1.56775500 | 3.10716600  |
| H | 0.94892000  | -2.47195400 | 3.61475800  |
| O | -0.59437200 | 0.75406400  | 1.36409500  |
| H | 0.00781400  | 0.07916300  | 1.70427800  |
| H | -0.38658200 | 3.54154300  | -1.78579600 |
| H | 0.00563100  | 3.28656600  | 1.20836000  |

**PO + H<sub>2</sub>O-Co<sup>III</sup>-OH terminal carbon**

PO + H<sub>2</sub>O-Co<sup>III</sup>-OH = PO-OH-Co<sup>III</sup>-H<sub>2</sub>O

product complex

Charge: 0

Spin Multiplicity: 1

Sum of electronic and thermal Free Energies (a.u.): -2153.104453

Thermal correction to Gibbs Free Energy (a.u.): 0.863028

No imaginary frequency

|    |             |             |             |
|----|-------------|-------------|-------------|
| C  | 4.73947900  | -1.61310400 | -0.27651000 |
| C  | 5.42308600  | -0.37291100 | -0.24093500 |
| C  | 3.36206400  | -1.75997100 | -0.29234900 |
| H  | 5.34325100  | -2.51116300 | -0.27967100 |
| C  | 4.64240200  | 0.76007100  | -0.20550000 |
| C  | 2.55771000  | -0.56954800 | -0.30157100 |
| C  | 3.22644700  | 0.69132300  | -0.23458900 |
| H  | 5.09476200  | 1.74451500  | -0.14913200 |
| O  | 1.25298100  | -0.67957500 | -0.37239400 |
| C  | 2.52091200  | 1.93118300  | -0.13152100 |
| Co | -0.02928200 | 0.71331600  | -0.49088900 |
| N  | 1.23722500  | 2.09328900  | -0.17920800 |
| H  | 3.14592900  | 2.81158100  | 0.01965700  |
| N  | -1.29761400 | 2.11584300  | -0.69582300 |
| C  | 0.58511800  | 3.38821600  | 0.05587300  |
| C  | -2.57784600 | 1.97122600  | -0.60220000 |
| C  | -0.63978500 | 3.41601200  | -0.87432000 |
| C  | 1.44633000  | 4.63930800  | -0.11774300 |
| H  | -3.20534800 | 2.86281800  | -0.62616600 |
| C  | -3.27650000 | 0.72443500  | -0.47647300 |
| C  | -1.49076600 | 4.66326300  | -0.64001400 |
| C  | 0.59717500  | 5.89984400  | 0.10406400  |
| H  | 1.87598100  | 4.64578900  | -1.12843600 |
| H  | 2.27975400  | 4.63228700  | 0.59171500  |
| C  | -4.66842800 | 0.78844500  | -0.23320800 |
| C  | -2.61970200 | -0.53083300 | -0.63490800 |
| C  | -0.63161300 | 5.92503800  | -0.81182300 |
| H  | -2.33215600 | 4.69084100  | -1.34050600 |
| H  | -1.91010000 | 4.63165500  | 0.37425000  |
| H  | 1.21146900  | 6.79109700  | -0.05949800 |
| H  | 0.27025500  | 5.93197600  | 1.15159300  |
| C  | -5.43548500 | -0.35258600 | -0.12477300 |
| H  | -5.11578800 | 1.77084300  | -0.12529700 |
| C  | -3.40579000 | -1.72390200 | -0.53875700 |
| O  | -1.32746300 | -0.62069000 | -0.88798300 |
| H  | -0.30508800 | 5.99819100  | -1.85778600 |
| H  | -1.23789300 | 6.81391000  | -0.60989100 |
| C  | -4.76408400 | -1.58638300 | -0.28724000 |
| H  | -5.35666100 | -2.48795800 | -0.20427900 |
| O  | 0.31144100  | 0.61573800  | -2.57328200 |
| H  | 1.05561300  | -0.00827200 | -2.53432200 |
| H  | -0.46839300 | 0.03722900  | -2.66985500 |
| C  | -2.75489100 | -3.10765300 | -0.69875500 |
| C  | -3.77304200 | -4.24835000 | -0.52432300 |
| H  | -3.25990200 | -5.20714300 | -0.64419400 |
| H  | -4.22899200 | -4.24125900 | 0.47107200  |
| H  | -4.57198900 | -4.20656500 | -1.27213100 |
| C  | -2.14471100 | -3.23965300 | -2.11237700 |
| H  | -2.92102300 | -3.13707200 | -2.87838200 |
| H  | -1.38210900 | -2.47978800 | -2.28158500 |
| H  | -1.67903900 | -4.22408200 | -2.23016800 |
| C  | -1.65447100 | -3.29515500 | 0.36832000  |
| H  | -0.86116800 | -2.56093000 | 0.24471500  |
| H  | -2.07095100 | -3.20326400 | 1.37695800  |
| H  | -1.20921600 | -4.29175300 | 0.27859800  |
| C  | -6.94160300 | -0.34166800 | 0.15853400  |
| C  | -7.68838200 | -1.03533000 | -1.00157500 |
| H  | -7.36563900 | -2.07267700 | -1.12857600 |
| H  | -8.76718900 | -1.04297000 | -0.81144300 |
| H  | -7.51055200 | -0.51150900 | -1.94619100 |
| C  | -7.21977100 | -1.09993800 | 1.47477600  |
| H  | -8.29346400 | -1.10781700 | 1.69206200  |
| H  | -6.88289900 | -2.13922000 | 1.42221100  |
| H  | -6.70311000 | -0.62337800 | 2.31359400  |

|   |             |             |             |
|---|-------------|-------------|-------------|
| C | -7.48969600 | 1.08744300  | 0.29940700  |
| H | -7.01463300 | 1.62226500  | 1.12811800  |
| H | -7.34228700 | 1.66910500  | -0.61655800 |
| H | -8.56477400 | 1.05325400  | 0.50036300  |
| C | 2.70039600  | -3.14639800 | -0.24516700 |
| C | 3.73739200  | -4.28330000 | -0.27808700 |
| H | 4.33476900  | -4.26789400 | -1.19617500 |
| H | 4.41755800  | -4.24543300 | 0.57868900  |
| H | 3.21572800  | -5.24429000 | -0.23893200 |
| C | 1.91430000  | -3.26908700 | 1.08031900  |
| H | 2.59553300  | -3.20636900 | 1.93472300  |
| H | 1.17393300  | -2.47649100 | 1.17659000  |
| H | 1.39502700  | -4.23231200 | 1.12758700  |
| C | 1.75684300  | -3.34970500 | -1.45278700 |
| H | 0.94470300  | -2.62548500 | -1.44721300 |
| H | 2.31319000  | -3.25646900 | -2.39299200 |
| H | 1.32201800  | -4.35461200 | -1.42042400 |
| C | 6.95506400  | -0.35403000 | -0.21951200 |
| C | 7.51123700  | 1.07816700  | -0.17596800 |
| H | 8.60514300  | 1.05046600  | -0.16795700 |
| H | 7.20032500  | 1.65901900  | -1.05064400 |
| H | 7.18698400  | 1.60974200  | 0.72442500  |
| C | 7.46094100  | -1.10861100 | 1.02940000  |
| H | 7.09099000  | -0.63573700 | 1.94424300  |
| H | 7.12934800  | -2.15088000 | 1.03519700  |
| H | 8.55608600  | -1.10716500 | 1.05951400  |
| C | 7.49379100  | -1.04557000 | -1.49075700 |
| H | 7.15594500  | -0.52152200 | -2.39061800 |
| H | 8.58929300  | -1.05167200 | -1.48841200 |
| H | 7.15532100  | -2.08337700 | -1.56127400 |
| C | -0.03969700 | 0.20351200  | 3.90876100  |
| C | 0.52834500  | 0.64070100  | 2.50811700  |
| O | 0.97618600  | 0.41211800  | 4.72845400  |
| H | -0.95387600 | 0.84165900  | 4.07205100  |
| H | 0.80571500  | 1.69154700  | 2.55241600  |
| H | 1.39706000  | 0.02260800  | 2.27597100  |
| C | -0.52407400 | -1.26551600 | 3.82560400  |
| H | -0.85557500 | -1.58558500 | 4.81777500  |
| H | -1.37352000 | -1.40653100 | 3.13476300  |
| H | 0.30281900  | -1.91796700 | 3.52183200  |
| O | -0.44667000 | 0.52882500  | 1.41088700  |
| H | -0.79551200 | -0.37798700 | 1.44373600  |
| H | -0.25930200 | 3.43075300  | -1.90607500 |
| H | 0.20302100  | 3.36275300  | 1.08754900  |

**PO + H<sub>2</sub>O-Co<sup>III</sup>-OH middle carbon**

PO + H<sub>2</sub>O-Co<sup>III</sup>-OH = PO-OH-Co<sup>III</sup>-H<sub>2</sub>O

transition state

Charge: 0

Spin Multiplicity: 1

Sum of electronic and thermal Free Energies (a.u.): -2153.097875

Thermal correction to Gibbs Free Energy (a.u.): 0.865434

Imaginary frequencies: -357.72

|    |             |             |             |
|----|-------------|-------------|-------------|
| C  | 4.83322800  | -1.73402600 | 0.12147000  |
| C  | 5.49380000  | -0.48965800 | -0.00290200 |
| C  | 3.45689100  | -1.89948900 | 0.17065500  |
| H  | 5.45118200  | -2.62031300 | 0.18281500  |
| C  | 4.69194200  | 0.62903800  | -0.08004500 |
| C  | 2.63271700  | -0.72697900 | 0.08281800  |
| C  | 3.27970600  | 0.53734500  | -0.04751400 |
| H  | 5.12701900  | 1.61866200  | -0.17057500 |
| O  | 1.32375000  | -0.85521400 | 0.12400700  |
| C  | 2.55213500  | 1.77298300  | -0.12335700 |
| Co | 0.04728200  | 0.45354600  | -0.37101300 |
| N  | 1.27017100  | 1.91093400  | -0.18640500 |
| H  | 3.16443600  | 2.67447500  | -0.12844400 |
| N  | -1.20023200 | 1.78298800  | -0.91996500 |
| C  | 0.61655800  | 3.22677800  | -0.25925900 |
| C  | -2.47991100 | 1.60748800  | -0.91751400 |

|   |             |             |             |
|---|-------------|-------------|-------------|
| C | -0.55319700 | 3.06596100  | -1.24609400 |
| C | 1.48505700  | 4.42530600  | -0.63610200 |
| H | -3.11972500 | 2.46413200  | -1.13076000 |
| C | -3.15292500 | 0.37341200  | -0.63505200 |
| C | -1.44226700 | 4.30980000  | -1.20911400 |
| C | 0.60555500  | 5.68519100  | -0.59500300 |
| H | 1.92898600  | 4.28534200  | -1.63213600 |
| H | 2.30367700  | 4.54062500  | 0.08140100  |
| C | -4.55058500 | 0.43378400  | -0.43277600 |
| C | -2.45719500 | -0.87024100 | -0.60355200 |
| C | -0.60384500 | 5.55800200  | -1.52923900 |
| H | -2.26353100 | 4.22491800  | -1.92918800 |
| H | -1.87618500 | 4.40495400  | -0.20586800 |
| H | 1.19972200  | 6.56498300  | -0.86340600 |
| H | 0.25878200  | 5.82210500  | 0.43649300  |
| C | -5.28908200 | -0.70265700 | -0.17393700 |
| H | -5.02475400 | 1.40853200  | -0.47529400 |
| C | -3.21408600 | -2.05756000 | -0.35020900 |
| O | -1.16290600 | -0.94608700 | -0.84458500 |
| H | -0.25937700 | 5.50298100  | -2.57126000 |
| H | -1.23580600 | 6.44891300  | -1.45390700 |
| C | -4.58127100 | -1.92598100 | -0.14577700 |
| H | -5.15081600 | -2.82368100 | 0.05647200  |
| O | -0.59205700 | 0.43277700  | 1.38406000  |
| H | 0.12471500  | 0.02371400  | 1.89133700  |
| O | 0.60448800  | 0.16065200  | -2.32543000 |
| H | -0.11564700 | -0.49817800 | -2.41865800 |
| H | 1.41574700  | -0.36559200 | -2.24180400 |
| C | -1.08228200 | 2.05662000  | 2.25495500  |
| C | 0.07208800  | 2.73818500  | 2.90296800  |
| O | -0.51650100 | 3.96257300  | 2.75150600  |
| H | -1.33745600 | 2.46749700  | 1.29877900  |
| H | 1.04534300  | 2.56338200  | 2.38955100  |
| H | 0.20818500  | 2.39024500  | 3.95108800  |
| C | -2.23619700 | 1.60010800  | 3.09683200  |
| H | -1.91619800 | 0.85128500  | 3.82881400  |
| H | -2.61684300 | 2.46963100  | 3.63969800  |
| H | -3.03397600 | 1.17828400  | 2.48175400  |
| C | 2.82135400  | -3.28921700 | 0.33034500  |
| C | 2.05442800  | -3.34410400 | 1.67083500  |
| H | 1.28441100  | -2.57534400 | 1.71647000  |
| H | 1.57332400  | -4.32053700 | 1.79244600  |
| H | 2.74537400  | -3.19918900 | 2.50813500  |
| C | 3.87546800  | -4.41040200 | 0.35232700  |
| H | 3.36952800  | -5.37453500 | 0.46060000  |
| H | 4.45800100  | -4.44500400 | -0.57452300 |
| H | 4.56913300  | -4.30792500 | 1.19317700  |
| C | 1.86655800  | -3.57667500 | -0.85120600 |
| H | 1.05907500  | -2.84846900 | -0.89272500 |
| H | 2.41837000  | -3.55798300 | -1.79869200 |
| H | 1.42376700  | -4.57248200 | -0.74279900 |
| C | 7.02521100  | -0.44437100 | -0.04062000 |
| C | 7.55498600  | 0.99240400  | -0.17308100 |
| H | 7.20792300  | 1.46762500  | -1.09640300 |
| H | 7.24657000  | 1.61610300  | 0.67210600  |
| H | 8.64899300  | 0.98307800  | -0.19623100 |
| C | 7.58905300  | -1.05054000 | 1.26303900  |
| H | 7.27477200  | -2.08986100 | 1.39537800  |
| H | 8.68438800  | -1.03202200 | 1.25158800  |
| H | 7.24535000  | -0.48390500 | 2.13403500  |
| C | 7.53360000  | -1.26212200 | -1.24790600 |
| H | 8.62838900  | -1.24858000 | -1.28636500 |
| H | 7.21514700  | -2.30711600 | -1.19202000 |
| H | 7.15285200  | -0.84589500 | -2.18608400 |
| C | -6.79992200 | -0.69426400 | 0.08215100  |
| C | -7.08148500 | -1.25483200 | 1.49332900  |
| H | -6.59277600 | -0.64256600 | 2.25764400  |
| H | -8.15831800 | -1.26156500 | 1.69500200  |
| H | -6.71504800 | -2.27970700 | 1.60177900  |



|   |             |             |             |
|---|-------------|-------------|-------------|
| C | -7.50633700 | -1.57555500 | -0.97083700 |
| H | -7.32519700 | -1.19394300 | -1.98069100 |
| H | -7.15319100 | -2.61017500 | -0.93614200 |
| H | -8.58794400 | -1.58639500 | -0.79711500 |
| C | -7.38908700 | 0.72300500  | -0.00072900 |
| H | -7.23884400 | 1.16571600  | -0.99083800 |
| H | -8.46670300 | 0.68760500  | 0.18625500  |
| H | -6.94494200 | 1.38944300  | 0.74560700  |
| C | -2.52277900 | -3.42745200 | -0.28497700 |
| C | -3.51210200 | -4.56488100 | 0.02453200  |
| H | -4.00540400 | -4.42709300 | 0.99223300  |
| H | -4.28361600 | -4.66324000 | -0.74666700 |
| H | -2.96570700 | -5.51207700 | 0.06650200  |
| C | -1.46185400 | -3.40792400 | 0.83670200  |
| H | -0.93851100 | -4.36949600 | 0.87583500  |
| H | -0.73116700 | -2.61936000 | 0.67143900  |
| H | -1.93903300 | -3.24178600 | 1.80840700  |
| C | -1.86165800 | -3.74861800 | -1.64419200 |
| H | -2.61593100 | -3.79060400 | -2.43760800 |
| H | -1.12013000 | -2.99566100 | -1.90798800 |
| H | -1.36232100 | -4.72263300 | -1.59872100 |
| H | 0.19732100  | 3.46478500  | 0.72755700  |
| H | -0.12939000 | 2.94591800  | -2.25376500 |

**PO + H<sub>2</sub>O-Co<sup>III</sup>-OH middle carbon**

PO + H<sub>2</sub>O-Co<sup>III</sup>-OH = PO-OH-Co<sup>III</sup>-H<sub>2</sub>O

reactant complex

Charge: 0

Spin Multiplicity: 1

Sum of electronic and thermal Free Energies (a.u.): -2153.158834

Thermal correction to Gibbs Free Energy (a.u.): 0.862457

No imaginary frequency

|    |             |             |             |
|----|-------------|-------------|-------------|
| C  | 5.11807500  | -1.44456600 | 0.23917600  |
| C  | 5.69934500  | -0.15684200 | 0.16307800  |
| C  | 3.75529000  | -1.69876200 | 0.24398000  |
| H  | 5.79105500  | -2.29013100 | 0.30047600  |
| C  | 4.82817500  | 0.90928400  | 0.08951300  |
| C  | 2.85530200  | -0.58073300 | 0.15264300  |
| C  | 3.42523600  | 0.72679600  | 0.07183700  |
| H  | 5.20061100  | 1.92719600  | 0.03705100  |
| O  | 1.56188800  | -0.79685300 | 0.14506600  |
| C  | 2.61691300  | 1.91368000  | 0.01321600  |
| Co | 0.22068900  | 0.44243700  | -0.37974100 |
| N  | 1.33817700  | 1.95027600  | -0.13929000 |
| H  | 3.15657300  | 2.85701200  | 0.10977000  |
| N  | -1.08255100 | 1.68227400  | -0.99632000 |
| C  | 0.54377000  | 3.18266100  | -0.11869300 |
| C  | -2.34982100 | 1.45281300  | -1.01219000 |
| C  | -0.49973100 | 3.00651600  | -1.23815000 |
| C  | 1.30916100  | 4.49621900  | -0.25798600 |
| H  | -3.02536900 | 2.27966300  | -1.22821900 |
| C  | -2.97394600 | 0.18693800  | -0.74645500 |
| C  | -1.47001700 | 4.18548500  | -1.29793300 |
| C  | 0.32641500  | 5.67514800  | -0.31197100 |
| H  | 1.91285100  | 4.47400300  | -1.17588500 |
| H  | 2.00000700  | 4.62616500  | 0.58232200  |
| C  | -4.38002700 | 0.18312900  | -0.61601000 |
| C  | -2.22096500 | -1.01731200 | -0.63127600 |
| C  | -0.69267800 | 5.50135200  | -1.44381700 |
| H  | -2.15810400 | 4.06636600  | -2.14266500 |
| H  | -2.06212800 | 4.19911000  | -0.37691100 |
| H  | 0.87988000  | 6.61215700  | -0.43565500 |
| H  | -0.20596100 | 5.74309600  | 0.64536400  |
| C  | -5.07656300 | -0.97568200 | -0.33658000 |
| H  | -4.89694200 | 1.13052100  | -0.72654700 |
| C  | -2.93315600 | -2.22837600 | -0.35308100 |
| O  | -0.91622700 | -1.04220400 | -0.80565300 |
| H  | -0.16849700 | 5.51578300  | -2.40943600 |
| H  | -1.39344900 | 6.34279300  | -1.45475100 |
| C  | -4.31321800 | -2.15836700 | -0.21318700 |

|   |             |             |             |
|---|-------------|-------------|-------------|
| H | -4.84683800 | -3.07296400 | 0.01117200  |
| O | -0.40637300 | 0.61801900  | 1.32612600  |
| H | 0.03540500  | -0.11229000 | 1.78232800  |
| O | 0.83198300  | 0.07648200  | -2.35259400 |
| H | 0.11257100  | -0.58632700 | -2.40099400 |
| H | 1.63155500  | -0.45052300 | -2.19790000 |
| C | -2.96125400 | 1.96338400  | 2.31119000  |
| C | -2.00470700 | 2.86014900  | 2.96885800  |
| O | -2.52883300 | 3.18751700  | 1.66915100  |
| H | -2.52844300 | 1.07631100  | 1.85431700  |
| H | -0.95625800 | 2.56871100  | 2.97750000  |
| H | -2.33863100 | 3.51513000  | 3.77433900  |
| C | -4.41308100 | 1.90815800  | 2.70221000  |
| H | -4.58079900 | 1.10518800  | 3.42881400  |
| H | -4.74040400 | 2.85495600  | 3.14209800  |
| H | -5.03548300 | 1.69563000  | 1.82726100  |
| C | 3.20626200  | -3.12917100 | 0.36398000  |
| C | 2.42229700  | -3.25706500 | 1.68945000  |
| H | 1.61279000  | -2.53009600 | 1.73741800  |
| H | 1.99155800  | -4.26023500 | 1.78068900  |
| H | 3.09046400  | -3.09466500 | 2.54196600  |
| C | 4.32876100  | -4.18188800 | 0.38297200  |
| H | 3.88381100  | -5.17836700 | 0.46374900  |
| H | 4.92758000  | -4.15981700 | -0.53392000 |
| H | 5.00085500  | -4.05275600 | 1.23759300  |
| C | 2.28680100  | -3.45689400 | -0.83529700 |
| H | 1.42695200  | -2.79061000 | -0.86545600 |
| H | 2.84347300  | -3.37180400 | -1.77649400 |
| H | 1.92060200  | -4.48626700 | -0.75688100 |
| C | 7.22503800  | -0.01246500 | 0.17111700  |
| C | 7.66452500  | 1.45792300  | 0.08498200  |
| H | 7.31174300  | 1.93120300  | -0.83713800 |
| H | 7.29313300  | 2.04046700  | 0.93431200  |
| H | 8.75719800  | 1.51966900  | 0.09280900  |
| C | 7.79221900  | -0.61129800 | 1.47674000  |
| H | 7.54086200  | -1.67098600 | 1.57803800  |
| H | 8.88425700  | -0.52356400 | 1.49702400  |
| H | 7.38941500  | -0.08782400 | 2.34953200  |
| C | 7.81940800  | -0.76685000 | -1.03818600 |
| H | 8.91188400  | -0.68273000 | -1.04462300 |
| H | 7.56707200  | -1.83090600 | -1.01451000 |
| H | 7.43818900  | -0.35380100 | -1.97754600 |
| C | -6.59592600 | -1.02807200 | -0.14296100 |
| C | -6.90836600 | -1.49442300 | 1.29586000  |
| H | -6.48427900 | -0.79925700 | 2.02734900  |
| H | -7.99092800 | -1.54627400 | 1.45785800  |
| H | -6.49156700 | -2.48556700 | 1.49701800  |
| C | -7.21473500 | -2.02119200 | -1.15040800 |
| H | -7.01006500 | -1.70734800 | -2.17893100 |
| H | -6.81348000 | -3.03062900 | -1.02338400 |
| H | -8.30103900 | -2.07508200 | -1.01771400 |
| C | -7.25298600 | 0.34485600  | -0.35864900 |
| H | -7.07029000 | 0.72530000  | -1.36885500 |
| H | -8.33609800 | 0.26228700  | -0.22472100 |
| H | -6.88808000 | 1.08703100  | 0.35864700  |
| C | -2.17921800 | -3.55817000 | -0.20048700 |
| C | -3.12125500 | -4.72637900 | 0.14006100  |
| H | -3.64928700 | -4.56432500 | 1.08560000  |
| H | -3.86445900 | -4.90029400 | -0.64540400 |
| H | -2.53211000 | -5.64273600 | 0.24473800  |
| C | -1.14706600 | -3.43847200 | 0.94204800  |
| H | -0.59577100 | -4.37902100 | 1.05101400  |
| H | -0.43611700 | -2.63966400 | 0.74197200  |
| H | -1.65200400 | -3.22987700 | 1.89162800  |
| C | -1.46636200 | -3.90879000 | -1.52586400 |
| H | -2.19625300 | -4.03030900 | -2.33376700 |
| H | -0.76072200 | -3.12822900 | -1.80751900 |
| H | -0.91580400 | -4.85034800 | -1.42079700 |
| H | -0.01333500 | 3.16850900  | 0.82548100  |

H 0.05165900 2.93767000 -2.18749300  
**PO + H<sub>2</sub>O-Co<sup>III</sup>-OH middle carbon**  
 PO + H<sub>2</sub>O-Co<sup>III</sup>-OH = PO-OH-Co<sup>III</sup>-H<sub>2</sub>O  
 product complex  
 Charge: 0  
 Spin Multiplicity: 1  
 Sum of electronic and thermal Free Energies (a.u.): -2153.185342  
 Thermal correction to Gibbs Free Energy (a.u.): 0.868406  
 No imaginary frequency

|    |             |             |             |
|----|-------------|-------------|-------------|
| C  | 4.79933600  | -1.73652000 | -0.00585900 |
| C  | 5.49166900  | -0.49995900 | -0.02974100 |
| C  | 3.42451000  | -1.87524300 | -0.09595500 |
| H  | 5.39223200  | -2.63509100 | 0.10770400  |
| C  | 4.72057000  | 0.63718800  | -0.11979600 |
| C  | 2.63586700  | -0.68600200 | -0.26893700 |
| C  | 3.30850400  | 0.57315400  | -0.22809100 |
| H  | 5.17739400  | 1.62124200  | -0.10323400 |
| O  | 1.35082200  | -0.79685500 | -0.47931100 |
| C  | 2.60443400  | 1.81810900  | -0.24421800 |
| Co | 0.04029700  | 0.58569900  | -0.45475900 |
| N  | 1.32192800  | 1.98216800  | -0.30193400 |
| H  | 3.23038400  | 2.70737100  | -0.16462600 |
| N  | -1.23549500 | 1.97641400  | -0.70335800 |
| C  | 0.68263300  | 3.29600700  | -0.13702100 |
| C  | -2.51989500 | 1.83261600  | -0.66327600 |
| C  | -0.58325100 | 3.25981600  | -1.00209000 |
| C  | 1.53676400  | 4.52296500  | -0.45428800 |
| H  | -3.14385000 | 2.72030700  | -0.77260800 |
| C  | -3.22102000 | 0.59884000  | -0.47770700 |
| C  | -1.42397900 | 4.52166000  | -0.80744200 |
| C  | 0.70335600  | 5.80025100  | -0.27255400 |
| H  | 1.90999300  | 4.45578900  | -1.48541800 |
| H  | 2.40653100  | 4.56444000  | 0.20836900  |
| C  | -4.61180500 | 0.67316800  | -0.22783400 |
| C  | -2.55740700 | -0.66098800 | -0.57987500 |
| C  | -0.57793700 | 5.76676600  | -1.11287500 |
| H  | -2.30204600 | 4.50798700  | -1.46159000 |
| H  | -1.78652500 | 4.55725200  | 0.22830600  |
| H  | 1.30600200  | 6.67622600  | -0.53438700 |
| H  | 0.43958900  | 5.90428900  | 0.78785200  |
| C  | -5.37346500 | -0.46225100 | -0.05457400 |
| H  | -5.05969800 | 1.65932300  | -0.16319200 |
| C  | -3.34573100 | -1.85009200 | -0.42519200 |
| O  | -1.27669300 | -0.75489100 | -0.83945900 |
| H  | -0.31404300 | 5.76739200  | -2.17901300 |
| H  | -1.17277800 | 6.66912100  | -0.93688900 |
| C  | -4.70000700 | -1.70281000 | -0.16724600 |
| H  | -5.28995500 | -2.60070800 | -0.03604000 |
| O  | -0.04403500 | 0.38400600  | 1.38043900  |
| H  | 1.25940000  | 1.66487200  | 2.16154800  |
| O  | 0.27924700  | 0.45167700  | -2.53607100 |
| H  | -0.50106700 | -0.13504400 | -2.57919600 |
| H  | 1.02079300  | -0.17535600 | -2.45261500 |
| C  | -0.96974600 | 0.98037500  | 2.25409300  |
| C  | -0.14273600 | 1.61008500  | 3.39679100  |
| O  | 0.98079300  | 2.28937700  | 2.85867200  |
| H  | -1.52108000 | 1.79430800  | 1.76111400  |
| H  | 0.17863900  | 0.81430900  | 4.08871700  |
| H  | -0.74202700 | 2.33057000  | 3.96452600  |
| C  | -1.96708600 | -0.03958000 | 2.80470500  |
| H  | -1.42276500 | -0.87511100 | 3.25627800  |
| H  | -2.60744800 | 0.41390100  | 3.57204500  |
| H  | -2.60730200 | -0.43749400 | 2.01676100  |
| C  | 2.73678500  | -3.23938400 | 0.06511500  |
| C  | 1.87877400  | -3.18601100 | 1.35132600  |
| H  | 1.16778500  | -2.36020900 | 1.32080600  |
| H  | 1.32306600  | -4.12189200 | 1.47564500  |
| H  | 2.52328600  | -3.05485000 | 2.22721900  |
| C  | 3.75375500  | -4.38355600 | 0.22309100  |

|   |             |             |             |
|---|-------------|-------------|-------------|
| H | 3.21406700  | -5.32701800 | 0.34985000  |
| H | 4.39744800  | -4.48564700 | -0.65762800 |
| H | 4.39085800  | -4.25027200 | 1.10338800  |
| C | 1.85191400  | -3.57462300 | -1.15700000 |
| H | 1.04158900  | -2.85707200 | -1.26398300 |
| H | 2.45034500  | -3.57754400 | -2.07570600 |
| H | 1.41758200  | -4.57335200 | -1.03710300 |
| C | 7.02031900  | -0.48707300 | 0.07559100  |
| C | 7.58771900  | 0.94077400  | 0.03288700  |
| H | 7.32657300  | 1.45058700  | -0.90025900 |
| H | 7.22253100  | 1.54543600  | 0.86928500  |
| H | 8.67964500  | 0.90824000  | 0.09969400  |
| C | 7.45192100  | -1.13975800 | 1.40706300  |
| H | 7.10836800  | -2.17558600 | 1.48012500  |
| H | 8.54401300  | -1.14332100 | 1.49638400  |
| H | 7.03920900  | -0.59027800 | 2.25887900  |
| C | 7.62169000  | -1.28268200 | -1.10337900 |
| H | 8.71553800  | -1.29452700 | -1.04041800 |
| H | 7.27656400  | -2.32060900 | -1.10823400 |
| H | 7.33803900  | -0.83184600 | -2.05975100 |
| C | -6.87493100 | -0.44220300 | 0.25027300  |
| C | -7.12957300 | -1.13622600 | 1.60623700  |
| H | -6.60018000 | -0.61752600 | 2.41161000  |
| H | -8.19957200 | -1.13700400 | 1.84203100  |
| H | -6.78873300 | -2.17549000 | 1.59868800  |
| C | -7.63801100 | -1.19359700 | -0.86222600 |
| H | -7.47762000 | -0.71496100 | -1.83354200 |
| H | -7.31201200 | -2.23435900 | -0.94486700 |
| H | -8.71375400 | -1.19643500 | -0.65445800 |
| C | -7.42642000 | 0.99022600  | 0.33062100  |
| H | -7.29463300 | 1.52729400  | -0.61442000 |
| H | -8.49826400 | 0.96304200  | 0.54983000  |
| H | -6.93979200 | 1.56586400  | 1.12462100  |
| C | -2.68720900 | -3.23470500 | -0.51150500 |
| C | -3.70166900 | -4.37282400 | -0.30463600 |
| H | -4.17524900 | -4.32488500 | 0.68147900  |
| H | -4.48814800 | -4.36957200 | -1.06721900 |
| H | -3.18057100 | -5.33266300 | -0.37182400 |
| C | -1.60849300 | -3.35375200 | 0.58656200  |
| H | -1.10941100 | -4.32654500 | 0.51679600  |
| H | -0.86066900 | -2.57011400 | 0.48816600  |
| H | -2.06291900 | -3.27567600 | 1.57990500  |
| C | -2.04804100 | -3.43014800 | -1.90500800 |
| H | -2.80778100 | -3.36079600 | -2.69158800 |
| H | -1.28005600 | -2.68015800 | -2.09038300 |
| H | -1.58343200 | -4.42014400 | -1.96814200 |
| H | 0.38003700  | 3.34282700  | 0.91824700  |
| H | -0.26089200 | 3.20464400  | -2.05231900 |

**PO-Co<sup>III</sup>-Cl + H<sub>2</sub>O-Co<sup>III</sup>-OH terminal carbon**

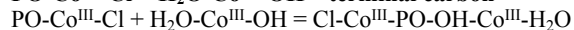

transition state

Charge: 0

Spin Multiplicity: 1

Sum of electronic and thermal Free Energies (a.u.): -4421.254940

Thermal correction to Gibbs Free Energy (a.u.): 1.644661

Imaginary frequencies: -432.09

|    |             |            |             |
|----|-------------|------------|-------------|
| C  | -1.24633900 | 6.54250500 | -0.85658400 |
| C  | -1.19657300 | 6.91032400 | 0.51099300  |
| C  | -0.50098500 | 5.52663600 | -1.42973500 |
| H  | -1.91024100 | 7.10797800 | -1.49832200 |
| C  | -0.31140500 | 6.21223200 | 1.30309200  |
| C  | 0.36132900  | 4.74600100 | -0.57564200 |
| C  | 0.46737900  | 5.14539800 | 0.79478100  |
| H  | -0.19155500 | 6.46090900 | 2.35291500  |
| O  | 1.00601400  | 3.73837800 | -1.07872700 |
| C  | 1.38290100  | 4.52335800 | 1.70381400  |
| Co | 1.91804500  | 2.40853300 | -0.08760500 |
| N  | 2.09905900  | 3.47829500 | 1.46706400  |

|    |             |             |             |
|----|-------------|-------------|-------------|
| H  | 1.46974800  | 4.99998900  | 2.68141500  |
| N  | 2.77479700  | 1.03842700  | 0.92042100  |
| Cl | 3.94482100  | 3.13194800  | -0.84078000 |
| C  | 3.02143500  | 2.87947700  | 2.43136000  |
| C  | 3.33651500  | -0.00839600 | 0.42544300  |
| C  | 2.77392400  | 1.35966200  | 2.34667000  |
| C  | 2.92065500  | 3.36683000  | 3.87649100  |
| H  | 3.85778900  | -0.68896100 | 1.09631700  |
| C  | 3.34093600  | -0.37141200 | -0.96501000 |
| C  | 3.74815800  | 0.57986000  | 3.22557500  |
| C  | 3.89368100  | 2.58496700  | 4.77197800  |
| H  | 1.89201300  | 3.22747900  | 4.23587000  |
| H  | 3.14348900  | 4.43744600  | 3.93489900  |
| C  | 4.19870200  | -1.42452000 | -1.35208500 |
| C  | 2.51651600  | 0.29706500  | -1.92188100 |
| C  | 3.65869000  | 1.07260000  | 4.67587600  |
| H  | 3.52254700  | -0.48846400 | 3.18315100  |
| H  | 4.76914500  | 0.72007900  | 2.84580700  |
| H  | 3.79403600  | 2.92128300  | 5.80967900  |
| H  | 4.92363900  | 2.80988600  | 4.46511100  |
| C  | 4.28969200  | -1.84851500 | -2.66307600 |
| H  | 4.81340500  | -1.87295000 | -0.58086400 |
| C  | 2.60171000  | -0.13981500 | -3.29375000 |
| O  | 1.68938200  | 1.24457000  | -1.59445800 |
| H  | 2.66376900  | 0.83352800  | 5.07579300  |
| H  | 4.38301800  | 0.53388300  | 5.29736500  |
| C  | 3.47396700  | -1.17140400 | -3.60429900 |
| H  | 3.55008600  | -1.47662100 | -4.64085000 |
| C  | 1.77964200  | 0.57640200  | -4.37405000 |
| C  | 2.04654700  | 0.01218100  | -5.78050000 |
| H  | 1.43208600  | 0.55387400  | -6.50636200 |
| H  | 3.09299600  | 0.13519900  | -6.07784100 |
| H  | 1.78963300  | -1.05045600 | -5.85906100 |
| C  | 0.27068300  | 0.40761800  | -4.08546800 |
| H  | -0.02739800 | -0.63994100 | -4.20721400 |
| H  | 0.02575100  | 0.72295200  | -3.07294000 |
| H  | -0.31944300 | 1.00526400  | -4.78838800 |
| C  | 2.15690900  | 2.07593700  | -4.39123800 |
| H  | 1.98771900  | 2.54134400  | -3.42286100 |
| H  | 3.21489100  | 2.19609000  | -4.64518000 |
| H  | 1.56140500  | 2.60064600  | -5.14678100 |
| C  | 5.25069700  | -2.94569200 | -3.13456300 |
| C  | 4.47202400  | -4.06353500 | -3.86144800 |
| H  | 3.90343900  | -3.67539300 | -4.71150700 |
| H  | 5.16020600  | -4.82639200 | -4.24207000 |
| H  | 3.76740700  | -4.55316200 | -3.18125000 |
| C  | 6.28147600  | -2.33107900 | -4.10699500 |
| H  | 6.98497400  | -3.09402800 | -4.45965200 |
| H  | 5.79312100  | -1.89348900 | -4.98236800 |
| H  | 6.85026000  | -1.53772400 | -3.61300600 |
| C  | 6.01316300  | -3.58521600 | -1.96255100 |
| H  | 6.62495900  | -2.85158800 | -1.42898500 |
| H  | 5.32930400  | -4.04989400 | -1.24298200 |
| H  | 6.68177300  | -4.36776600 | -2.33467500 |
| C  | -0.54732000 | 5.24935100  | -2.94042400 |
| C  | -1.51806400 | 6.19263800  | -3.67252800 |
| H  | -2.55059700 | 6.06940600  | -3.32693800 |
| H  | -1.23781300 | 7.24440000  | -3.55349500 |
| H  | -1.49858000 | 5.96604200  | -4.74323300 |
| C  | 0.86453500  | 5.47215100  | -3.53116200 |
| H  | 1.16498700  | 6.51851900  | -3.41000200 |
| H  | 1.60260900  | 4.84031100  | -3.03742700 |
| H  | 0.86575400  | 5.24031800  | -4.60258700 |
| C  | -1.00739900 | 3.80184700  | -3.21923800 |
| H  | -0.29415200 | 3.08871800  | -2.81465000 |
| H  | -1.99157100 | 3.61535000  | -2.77366200 |
| H  | -1.08919700 | 3.63644600  | -4.29972700 |
| C  | -2.08782500 | 8.04684700  | 1.02198600  |
| C  | -3.56974200 | 7.68221400  | 0.78481800  |

|    |             |             |             |
|----|-------------|-------------|-------------|
| H  | -4.22704100 | 8.48721900  | 1.13346300  |
| H  | -3.77820900 | 7.51586000  | -0.27604700 |
| H  | -3.83247000 | 6.76617800  | 1.32380600  |
| C  | -1.89074900 | 8.30200500  | 2.52487600  |
| H  | -2.13182700 | 7.41420500  | 3.11859000  |
| H  | -0.86105400 | 8.59672500  | 2.75167000  |
| H  | -2.54869900 | 9.11262100  | 2.85437600  |
| C  | -1.75533700 | 9.35037100  | 0.26353400  |
| H  | -1.91167800 | 9.24173000  | -0.81352700 |
| H  | -2.39028000 | 10.17301300 | 0.61237800  |
| H  | -0.70955600 | 9.63219200  | 0.42127100  |
| C  | 2.38032100  | -2.79870200 | 3.65994900  |
| C  | 3.33731600  | -3.19538700 | 2.70169300  |
| C  | 1.05209500  | -2.49548200 | 3.37806000  |
| H  | 2.70253200  | -2.72106300 | 4.68731900  |
| C  | 2.89948100  | -3.26976100 | 1.39208900  |
| C  | 0.60274700  | -2.60711100 | 2.01978600  |
| C  | 1.56551200  | -2.98433200 | 1.03181900  |
| H  | 3.58156700  | -3.55432000 | 0.59749000  |
| O  | -0.65612000 | -2.36637700 | 1.72911300  |
| C  | 1.24287800  | -3.06947600 | -0.36750000 |
| Co | -1.55473500 | -2.85609100 | 0.11745800  |
| N  | 0.05479300  | -3.02103400 | -0.86694000 |
| H  | 2.08972600  | -3.18041000 | -1.04368000 |
| N  | -2.42920900 | -3.47053900 | -1.45834200 |
| C  | -0.22103100 | -3.09470300 | -2.30606800 |
| C  | -3.68148300 | -3.29756100 | -1.71251400 |
| C  | -1.46512200 | -3.99255600 | -2.43493900 |
| C  | 0.92015000  | -3.59549600 | -3.18402800 |
| H  | -4.05327500 | -3.57136000 | -2.70014700 |
| C  | -4.65364300 | -2.74437400 | -0.81034000 |
| C  | -1.93315100 | -4.08560500 | -3.88632000 |
| C  | 0.46037100  | -3.71673500 | -4.64234200 |
| H  | 1.25519700  | -4.57565000 | -2.81760600 |
| H  | 1.76702000  | -2.90986800 | -3.12365000 |
| C  | -5.93057200 | -2.44988800 | -1.33919200 |
| C  | -4.35738100 | -2.50174200 | 0.56184100  |
| C  | -0.78800600 | -4.59574500 | -4.77515900 |
| H  | -2.79459900 | -4.75711800 | -3.97069900 |
| H  | -2.25473400 | -3.09241000 | -4.22605700 |
| H  | 1.27761500  | -4.12020300 | -5.24902900 |
| H  | 0.24423000  | -2.71603200 | -5.03531800 |
| C  | -6.92316400 | -1.89193400 | -0.55839500 |
| H  | -6.10378700 | -2.66445900 | -2.38830500 |
| C  | -5.36945900 | -1.90753500 | 1.37894900  |
| O  | -3.18912100 | -2.82521800 | 1.08988300  |
| H  | -0.54218000 | -5.62673800 | -4.48718500 |
| H  | -1.12167500 | -4.63208200 | -5.81727000 |
| C  | -6.59859700 | -1.63322100 | 0.79224900  |
| H  | -7.36373100 | -1.18070000 | 1.40928800  |
| O  | -1.48511200 | -4.77846900 | 0.84909400  |
| H  | -0.87402700 | -4.68750400 | 1.59819500  |
| H  | -2.37339800 | -4.67274600 | 1.24361200  |
| C  | -5.08682600 | -1.56951500 | 2.85084400  |
| C  | -6.28112600 | -0.87105300 | 3.52446000  |
| H  | -6.02231100 | -0.64148600 | 4.56242500  |
| H  | -6.53475200 | 0.07309800  | 3.03140100  |
| H  | -7.17432300 | -1.50432900 | 3.54109100  |
| C  | -4.79985400 | -2.86719300 | 3.63810000  |
| H  | -5.67210800 | -3.52942000 | 3.61625500  |
| H  | -3.94666000 | -3.39931900 | 3.21912300  |
| H  | -4.57808500 | -2.63211900 | 4.68473000  |
| C  | -3.87603300 | -0.61264600 | 2.93763100  |
| H  | -2.98194300 | -1.07069900 | 2.51892500  |
| H  | -4.08403100 | 0.31794800  | 2.39815800  |
| H  | -3.67458600 | -0.35623100 | 3.98304700  |
| C  | -8.31879000 | -1.53760500 | -1.08366300 |
| C  | -9.38250200 | -2.31405700 | -0.27725800 |
| H  | -9.33949100 | -2.07204900 | 0.78857200  |

|   |              |             |             |
|---|--------------|-------------|-------------|
| H | -10.38802800 | -2.06725600 | -0.63478900 |
| H | -9.23723300  | -3.39398300 | -0.38146900 |
| C | -8.55702000  | -0.02043000 | -0.92101300 |
| H | -9.55305900  | 0.25134600  | -1.28691900 |
| H | -8.49058300  | 0.29031500  | 0.12559200  |
| H | -7.81584600  | 0.55183800  | -1.48760500 |
| C | -8.48207500  | -1.89592500 | -2.56942900 |
| H | -7.77158400  | -1.34915200 | -3.19774200 |
| H | -8.34386600  | -2.96794000 | -2.74433400 |
| H | -9.48991400  | -1.63301900 | -2.90453700 |
| C | 0.08771200   | -2.05755300 | 4.49282300  |
| C | 0.76256700   | -2.05339600 | 5.87637700  |
| H | 1.12338000   | -3.04691000 | 6.16245000  |
| H | 1.60399300   | -1.35419900 | 5.92227600  |
| H | 0.03323600   | -1.73808300 | 6.62846800  |
| C | -0.40627800  | -0.62120400 | 4.21588000  |
| H | 0.43543900   | 0.07800700  | 4.19331800  |
| H | -0.93106500  | -0.56191500 | 3.26512200  |
| H | -1.09399900  | -0.29821200 | 5.00498800  |
| C | -1.11720600  | -3.02329500 | 4.56492700  |
| H | -1.67915400  | -3.01548600 | 3.63270900  |
| H | -0.77692000  | -4.04455300 | 4.77391400  |
| H | -1.79126900  | -2.72399900 | 5.37464500  |
| C | 4.78097400   | -3.56304800 | 3.07581600  |
| C | 4.97437200   | -5.08140400 | 2.86939500  |
| H | 5.99613500   | -5.38094900 | 3.12786900  |
| H | 4.28107800   | -5.65024900 | 3.49719300  |
| H | 4.79265700   | -5.36424300 | 1.82789900  |
| C | 5.78053400   | -2.80281900 | 2.17893500  |
| H | 5.65211200   | -3.05066800 | 1.12232400  |
| H | 5.66848800   | -1.72010600 | 2.29097200  |
| H | 6.80850100   | -3.06464700 | 2.45058100  |
| C | 5.10478700   | -3.22200900 | 4.54051600  |
| H | 4.48637000   | -3.79218300 | 5.24059100  |
| H | 6.14984600   | -3.46718700 | 4.75231600  |
| H | 4.96381500   | -2.15596200 | 4.74763500  |
| C | -0.85509400  | 1.57068600  | -0.15992400 |
| C | -0.46682800  | 0.23509100  | 0.29058300  |
| O | 0.23879700   | 1.87729500  | 0.69574400  |
| H | -0.63780900  | 1.77316300  | -1.20664800 |
| H | 0.36708000   | -0.23268400 | -0.20377900 |
| H | -0.72340800  | -0.07730000 | 1.28718800  |
| C | -2.15984800  | 2.18285400  | 0.29692200  |
| H | -2.11675500  | 3.26843100  | 0.17088500  |
| H | -2.99608500  | 1.80017400  | -0.30024200 |
| H | -2.34421600  | 1.96052000  | 1.35268100  |
| O | -1.72834800  | -1.11555600 | -0.49824400 |
| H | -2.57191400  | -0.80139200 | -0.14102800 |
| H | 4.03232000   | 3.06631600  | 2.04532000  |
| H | 1.74736300   | 1.18271700  | 2.69559700  |
| H | -1.17815500  | -4.99423100 | -2.08378500 |
| H | -0.51021200  | -2.08151000 | -2.61093900 |

**PO-Co<sup>III</sup>-Cl + H<sub>2</sub>O-Co<sup>III</sup>-OH terminal carbon**

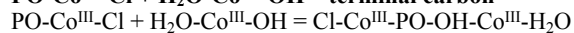

reactant complex

Charge: 0

Spin Multiplicity: 1

Sum of electronic and thermal Free Energies (a.u.): -4421.271076

Thermal correction to Gibbs Free Energy (a.u.): 1.641958

No imaginary frequency

|   |            |            |             |
|---|------------|------------|-------------|
| C | 3.69991800 | 5.64708000 | -0.99342200 |
| C | 3.87510400 | 5.94364200 | 0.38181300  |
| C | 3.61816100 | 4.37118100 | -1.52377500 |
| H | 3.63691800 | 6.48442200 | -1.67680900 |
| C | 4.00622000 | 4.86750800 | 1.23122500  |
| C | 3.66492000 | 3.25281700 | -0.61473200 |
| C | 3.91068300 | 3.53303700 | 0.76649400  |
| H | 4.18304200 | 5.01548300 | 2.29180400  |
| O | 3.48940100 | 2.05257000 | -1.08060300 |

|    |             |             |             |
|----|-------------|-------------|-------------|
| C  | 4.11798900  | 2.49420600  | 1.72919100  |
| Co | 3.24148900  | 0.48339500  | -0.05588200 |
| N  | 3.97566700  | 1.22813500  | 1.52631000  |
| H  | 4.43426200  | 2.82635600  | 2.71896300  |
| N  | 2.89508100  | -1.06090400 | 0.99638900  |
| Cl | 5.24874600  | -0.33068100 | -0.65779800 |
| C  | 4.22812100  | 0.20139300  | 2.53819800  |
| C  | 2.60806300  | -2.22624800 | 0.52567300  |
| C  | 3.05040100  | -0.78460100 | 2.42651600  |
| C  | 4.40551500  | 0.67794000  | 3.97914600  |
| H  | 2.49611600  | -3.05415500 | 1.22230800  |
| C  | 2.40727000  | -2.54184400 | -0.85861300 |
| C  | 3.24155900  | -1.99116300 | 3.34135300  |
| C  | 4.59064000  | -0.52630500 | 4.91543500  |
| H  | 3.52107000  | 1.25347400  | 4.28456800  |
| H  | 5.27110000  | 1.34415300  | 4.05770400  |
| C  | 2.28608600  | -3.90962300 | -1.19426000 |
| C  | 2.30304800  | -1.52717600 | -1.85777500 |
| C  | 3.43165300  | -1.52231100 | 4.78999200  |
| H  | 2.37353800  | -2.65089800 | 3.27973100  |
| H  | 4.12067400  | -2.56007700 | 3.01055400  |
| H  | 4.68521000  | -0.17943300 | 5.94995300  |
| H  | 5.53179800  | -1.03336000 | 4.66541300  |
| C  | 2.06977900  | -4.32459300 | -2.49204700 |
| H  | 2.39313100  | -4.62950200 | -0.39208700 |
| C  | 2.06660900  | -1.94860700 | -3.21504300 |
| O  | 2.37493000  | -0.25713900 | -1.57971700 |
| H  | 2.50436900  | -1.04572300 | 5.13536700  |
| H  | 3.59998100  | -2.38699200 | 5.44147700  |
| C  | 1.96982900  | -3.30688100 | -3.47346100 |
| H  | 1.81181900  | -3.61736300 | -4.49880900 |
| C  | 1.95327300  | -0.90373400 | -4.33342900 |
| C  | 1.73779900  | -1.54928900 | -5.71356600 |
| H  | 1.66270900  | -0.76126300 | -6.46923600 |
| H  | 2.57283500  | -2.19842600 | -5.99666700 |
| H  | 0.81377000  | -2.13673300 | -5.75779800 |
| C  | 0.74227800  | 0.01730900  | -4.06052800 |
| H  | -0.19132000 | -0.55343400 | -4.10958000 |
| H  | 0.81012800  | 0.47817600  | -3.07730100 |
| H  | 0.69107900  | 0.81020500  | -4.81434600 |
| C  | 3.25781000  | -0.07667900 | -4.39972700 |
| H  | 3.47202100  | 0.40762700  | -3.44946400 |
| H  | 4.10350900  | -0.72513400 | -4.65080900 |
| H  | 3.17367700  | 0.69066600  | -5.17739400 |
| C  | 1.97410200  | -5.79648200 | -2.90752100 |
| C  | 0.62566300  | -6.06120200 | -3.61151900 |
| H  | 0.49049500  | -5.41803700 | -4.48586500 |
| H  | 0.56647600  | -7.10139000 | -3.95035500 |
| H  | -0.21055400 | -5.87894000 | -2.92885500 |
| C  | 3.12898000  | -6.12587300 | -3.87867900 |
| H  | 3.08354600  | -7.17513600 | -4.19171300 |
| H  | 3.08552300  | -5.50501500 | -4.77811400 |
| H  | 4.09681800  | -5.94989000 | -3.39964200 |
| C  | 2.07224000  | -6.74238400 | -1.69961100 |
| H  | 3.02510300  | -6.63028600 | -1.17337400 |
| H  | 1.26170800  | -6.56584800 | -0.98354000 |
| H  | 1.99674800  | -7.78205600 | -2.03297500 |
| C  | 3.51327300  | 4.13282600  | -3.03833800 |
| C  | 3.50821800  | 5.45196500  | -3.83065900 |
| H  | 2.64302700  | 6.07737000  | -3.58400200 |
| H  | 4.41753000  | 6.03742900  | -3.65955900 |
| H  | 3.45786800  | 5.22663200  | -4.90041300 |
| C  | 4.73578400  | 3.30661900  | -3.50234700 |
| H  | 5.66041700  | 3.86850000  | -3.33189700 |
| H  | 4.80094500  | 2.36052800  | -2.96507400 |
| H  | 4.66020200  | 3.09489100  | -4.57505200 |
| C  | 2.21214100  | 3.37687900  | -3.38482700 |
| H  | 2.21835000  | 2.38217700  | -2.94674700 |
| H  | 1.33537500  | 3.92560900  | -3.02146300 |



|    |             |             |             |
|----|-------------|-------------|-------------|
| H  | 2.11692200  | 3.27273400  | -4.47150200 |
| C  | 3.93212000  | 7.40467700  | 0.83927300  |
| C  | 2.60821300  | 8.10842600  | 0.46886500  |
| H  | 2.63012400  | 9.15973200  | 0.77777400  |
| H  | 2.42499400  | 8.08052400  | -0.60917200 |
| H  | 1.76100800  | 7.62285300  | 0.96397500  |
| C  | 4.13176900  | 7.52455100  | 2.35856800  |
| H  | 3.31538500  | 7.04772900  | 2.91081900  |
| H  | 5.07452100  | 7.06895900  | 2.67833600  |
| H  | 4.15808700  | 8.57986400  | 2.64807900  |
| C  | 5.10625900  | 8.12323400  | 0.13932300  |
| H  | 5.00161500  | 8.10268200  | -0.94920300 |
| H  | 5.15597000  | 9.17294000  | 0.45041900  |
| H  | 6.05756300  | 7.64439700  | 0.39167500  |
| C  | -0.12578000 | -3.31963500 | 3.72796100  |
| C  | 0.30534300  | -4.31566100 | 2.82563700  |
| C  | -0.88265700 | -2.20635700 | 3.37717900  |
| H  | 0.14861000  | -3.43027900 | 4.76643800  |
| C  | -0.04003500 | -4.13155300 | 1.49766800  |
| C  | -1.28631100 | -2.05691300 | 2.00636500  |
| C  | -0.81526100 | -3.03397500 | 1.07078600  |
| H  | 0.27242200  | -4.84594100 | 0.74249000  |
| O  | -2.05602500 | -1.05514800 | 1.65705900  |
| C  | -1.09207200 | -2.94049000 | -0.34191400 |
| Co | -3.14731300 | -1.02142000 | 0.07737500  |
| N  | -1.97079000 | -2.16214200 | -0.87095700 |
| H  | -0.50033500 | -3.58894900 | -0.98835800 |
| N  | -4.25613800 | -1.09941700 | -1.46558300 |
| C  | -2.23971900 | -2.08511200 | -2.30775100 |
| C  | -5.18595000 | -0.24686400 | -1.72976800 |
| C  | -3.77764200 | -2.09982800 | -2.42706800 |
| C  | -1.60172900 | -3.16227900 | -3.17652600 |
| H  | -5.67310300 | -0.29421100 | -2.70425700 |
| C  | -5.63794700 | 0.80483300  | -0.86156200 |
| C  | -4.21833800 | -1.92693500 | -3.88044100 |
| C  | -2.04702500 | -3.00308700 | -4.63567700 |
| H  | -1.90259400 | -4.15193700 | -2.80702900 |
| H  | -0.51317800 | -3.10473500 | -3.11068800 |
| C  | -6.53618500 | 1.74684700  | -1.41014800 |
| C  | -5.19971200 | 0.91537600  | 0.48900200  |
| C  | -3.57454500 | -3.00749600 | -4.76311500 |
| H  | -5.30915100 | -1.98629100 | -3.96142900 |
| H  | -3.91670800 | -0.93097500 | -4.23009700 |
| H  | -1.61133900 | -3.80497400 | -5.24110000 |
| H  | -1.65112000 | -2.06023900 | -5.03338700 |
| C  | -6.99552500 | 2.82195600  | -0.67516900 |
| H  | -6.84542600 | 1.60682300  | -2.44060600 |
| C  | -5.64719300 | 2.03750500  | 1.25504000  |
| O  | -4.41922800 | 0.00856200  | 1.04606900  |
| H  | -3.96168000 | -3.99171700 | -4.46672500 |
| H  | -3.87229900 | -2.85457400 | -5.80568600 |
| C  | -6.52022000 | 2.93304400  | 0.65040200  |
| H  | -6.85771000 | 3.78242800  | 1.23009700  |
| O  | -4.22112000 | -2.59671300 | 0.94452100  |
| H  | -3.65477500 | -2.88745000 | 1.67617100  |
| H  | -4.82520400 | -1.93784900 | 1.33990200  |
| C  | -5.16310100 | 2.23906500  | 2.69957000  |
| C  | -5.67990400 | 3.55571800  | 3.30614300  |
| H  | -5.29219900 | 3.65792000  | 4.32434300  |
| H  | -5.34516100 | 4.42804300  | 2.73511100  |
| H  | -6.77283200 | 3.58148700  | 3.36760300  |
| C  | -5.68308400 | 1.08316100  | 3.58237000  |
| H  | -6.77820700 | 1.08359100  | 3.60460800  |
| H  | -5.34283200 | 0.11970900  | 3.20493200  |
| H  | -5.32215100 | 1.19767100  | 4.61045800  |
| C  | -3.61764000 | 2.28755600  | 2.73507900  |
| H  | -3.18485000 | 1.35712000  | 2.37214600  |
| H  | -3.24824100 | 3.11603200  | 2.11970900  |
| H  | -3.27138500 | 2.45221300  | 3.76131900  |

|   |             |             |             |
|---|-------------|-------------|-------------|
| C | -7.96092400 | 3.87769600  | -1.22557000 |
| C | -9.24108600 | 3.90205400  | -0.36227900 |
| H | -9.02000600 | 4.14059300  | 0.68206100  |
| H | -9.94144900 | 4.65702400  | -0.73623000 |
| H | -9.74198100 | 2.92898300  | -0.38397900 |
| C | -7.28525900 | 5.26556200  | -1.18023500 |
| H | -7.96359200 | 6.03489200  | -1.56538700 |
| H | -7.00678700 | 5.54701600  | -0.16060600 |
| H | -6.37593500 | 5.27363400  | -1.78933700 |
| C | -8.36520400 | 3.58556500  | -2.67951700 |
| H | -7.49801800 | 3.58605200  | -3.34774200 |
| H | -8.87054300 | 2.61862600  | -2.77161700 |
| H | -9.05672100 | 4.35624100  | -3.03367300 |
| C | -1.31461500 | -1.17652100 | 4.43358600  |
| C | -0.79191600 | -1.52766100 | 5.83788500  |
| H | -1.17834900 | -2.48841500 | 6.19360500  |
| H | 0.30203900  | -1.56277000 | 5.87399500  |
| H | -1.12014700 | -0.75943200 | 6.54445600  |
| C | -0.75924300 | 0.21771200  | 4.06801100  |
| H | 0.33552700  | 0.20063700  | 4.03652000  |
| H | -1.13124200 | 0.54668600  | 3.09978900  |
| H | -1.06330500 | 0.95408500  | 4.81998700  |
| C | -2.85735700 | -1.12230400 | 4.50895800  |
| H | -3.28241000 | -0.82742000 | 3.55140000  |
| H | -3.25959400 | -2.10073200 | 4.79735900  |
| H | -3.17385100 | -0.39518400 | 5.26442300  |
| C | 1.06419500  | -5.57161800 | 3.28162000  |
| C | 0.12238200  | -6.78882100 | 3.14742400  |
| H | 0.62615500  | -7.70783400 | 3.46754600  |
| H | -0.77286900 | -6.65601200 | 3.76315800  |
| H | -0.20121900 | -6.92319100 | 2.11063900  |
| C | 2.31143500  | -5.80723800 | 2.40458000  |
| H | 2.05066100  | -5.95209000 | 1.35329100  |
| H | 3.00864300  | -4.96642900 | 2.47106800  |
| H | 2.84098300  | -6.70765900 | 2.73310700  |
| C | 1.52732300  | -5.47133100 | 4.74543800  |
| H | 0.68335700  | -5.39566700 | 5.43771200  |
| H | 2.09175800  | -6.36921700 | 5.01476400  |
| H | 2.17993700  | -4.60673100 | 4.90549700  |
| C | 0.59632200  | 1.91509700  | -0.31122500 |
| C | 0.22279800  | 0.61914100  | 0.24253200  |
| O | 1.51545700  | 1.22761600  | 0.60398000  |
| H | 0.97852900  | 1.91575900  | -1.32499400 |
| H | 0.31372900  | -0.25763000 | -0.38132500 |
| H | -0.45082900 | 0.54539800  | 1.08286900  |
| C | 0.06839600  | 3.21994700  | 0.20651200  |
| H | 0.84194600  | 3.99169100  | 0.14918000  |
| H | -0.78161300 | 3.53704800  | -0.40708500 |
| H | -0.26448600 | 3.12467200  | 1.24405200  |
| O | -2.31787000 | 0.43817400  | -0.64955600 |
| H | -2.48822900 | 1.14014800  | -0.00650800 |
| H | 5.13060300  | -0.33195400 | 2.21147600  |
| H | 2.14521900  | -0.24358000 | 2.73709800  |
| H | -4.11825100 | -3.07931100 | -2.06072600 |
| H | -1.89499400 | -1.09140500 | -2.62064500 |

**PO-Co<sup>III</sup>-Cl + H<sub>2</sub>O-Co<sup>III</sup>-OH terminal carbon**

PO-Co<sup>III</sup>-Cl + H<sub>2</sub>O-Co<sup>III</sup>-OH = Cl-Co<sup>III</sup>-PO-OH-Co<sup>III</sup>-H<sub>2</sub>O

product complex

Charge: 0

Spin Multiplicity: 1

Sum of electronic and thermal Free Energies (a.u.): -4421.273812

Thermal correction to Gibbs Free Energy (a.u.): 1.647098

No imaginary frequency

|   |             |            |             |
|---|-------------|------------|-------------|
| C | -5.77957400 | 3.29202100 | -0.59788700 |
| C | -5.95678000 | 3.67994100 | 0.75256200  |
| C | -4.55251800 | 3.11700500 | -1.21415900 |
| H | -6.67247400 | 3.12847900 | -1.18864200 |
| C | -4.80906800 | 3.90852000 | 1.48147000  |
| C | -3.35444600 | 3.31124500 | -0.43221300 |

|    |             |             |             |
|----|-------------|-------------|-------------|
| C  | -3.52055800 | 3.72993200  | 0.92744700  |
| H  | -4.86574900 | 4.22759500  | 2.51769600  |
| O  | -2.19745000 | 3.12929400  | -0.98647000 |
| C  | -2.40724100 | 4.00787900  | 1.78582900  |
| Co | -0.57867500 | 2.88241800  | -0.03595000 |
| N  | -1.16600700 | 3.80077100  | 1.51260900  |
| H  | -2.66090800 | 4.43073400  | 2.75943000  |
| N  | 1.04597400  | 2.58176200  | 0.92225100  |
| Cl | 0.29585800  | 4.86207700  | -0.86178400 |
| C  | -0.06652500 | 4.05480900  | 2.44141000  |
| C  | 2.18643700  | 2.30696700  | 0.39612300  |
| C  | 0.84137500  | 2.80803900  | 2.34964800  |
| C  | -0.44646100 | 4.34387500  | 3.89371900  |
| H  | 3.06347800  | 2.24308000  | 1.03932300  |
| C  | 2.41761000  | 2.08003300  | -1.00686000 |
| C  | 2.09549600  | 2.95206600  | 3.20742400  |
| C  | 0.81331500  | 4.49033400  | 4.75993400  |
| H  | -1.06526000 | 3.52115300  | 4.27673600  |
| H  | -1.04657400 | 5.25785400  | 3.95577500  |
| C  | 3.75900600  | 2.06886400  | -1.44518500 |
| C  | 1.33761300  | 1.90895100  | -1.93042000 |
| C  | 1.71186000  | 3.25126000  | 4.66242000  |
| H  | 2.69455600  | 2.03805600  | 3.15876000  |
| H  | 2.71199000  | 3.77126800  | 2.81303000  |
| H  | 0.52853400  | 4.67358500  | 5.80183000  |
| H  | 1.37832000  | 5.37140000  | 4.42781800  |
| C  | 4.09563300  | 1.90017100  | -2.77518200 |
| H  | 4.52531000  | 2.24377300  | -0.69915000 |
| C  | 1.67987100  | 1.71889900  | -3.32115900 |
| O  | 0.09583400  | 1.89665900  | -1.56027700 |
| H  | 1.18150500  | 2.38510200  | 5.08177800  |
| H  | 2.61657100  | 3.38695800  | 5.26652300  |
| C  | 3.01832800  | 1.72866800  | -3.68164100 |
| H  | 3.26214900  | 1.62258700  | -4.73202800 |
| C  | 0.56111300  | 1.60697300  | -4.36687700 |
| C  | 1.10776300  | 1.49312300  | -5.80059800 |
| H  | 0.26891700  | 1.40727000  | -6.49839200 |
| H  | 1.68494400  | 2.37819200  | -6.08661700 |
| H  | 1.74369400  | 0.61126300  | -5.94002700 |
| C  | -0.29989100 | 0.35288200  | -4.09223100 |
| H  | 0.27737000  | -0.56042800 | -4.28303200 |
| H  | -0.65331200 | 0.34211000  | -3.06200800 |
| H  | -1.17068800 | 0.33716200  | -4.75633800 |
| C  | -0.32070600 | 2.87591900  | -4.30529800 |
| H  | -0.75800600 | 3.01077600  | -3.31892000 |
| H  | 0.27832400  | 3.76304200  | -4.53283400 |
| H  | -1.12506000 | 2.80407100  | -5.04606300 |
| C  | 5.53365600  | 1.99008500  | -3.30097700 |
| C  | 5.89600300  | 0.73654900  | -4.12615900 |
| H  | 5.19708000  | 0.57766300  | -4.95244600 |
| H  | 6.89911500  | 0.83695400  | -4.55516200 |
| H  | 5.88760100  | -0.16135900 | -3.49927700 |
| C  | 5.65735100  | 3.23916500  | -4.20195000 |
| H  | 6.67835400  | 3.34119700  | -4.58783000 |
| H  | 4.97751600  | 3.18138100  | -5.05679500 |
| H  | 5.40654200  | 4.14353400  | -3.63993000 |
| C  | 6.55701500  | 2.11480400  | -2.15995900 |
| H  | 6.39758500  | 3.02235400  | -1.57020600 |
| H  | 6.51236000  | 1.25329700  | -1.48329800 |
| H  | 7.57077400  | 2.15978900  | -2.57022900 |
| C  | -4.44739500 | 2.76068800  | -2.70464400 |
| C  | -5.82759000 | 2.55866100  | -3.35438000 |
| H  | -6.38432000 | 1.73757600  | -2.88877800 |
| H  | -6.44271300 | 3.46316700  | -3.30423300 |
| H  | -5.69354300 | 2.31087500  | -4.41242700 |
| C  | -3.74211000 | 3.92010500  | -3.44540800 |
| H  | -4.34528100 | 4.83220600  | -3.38005000 |
| H  | -2.76212400 | 4.12127200  | -3.01404200 |
| H  | -3.61537400 | 3.67174900  | -4.50591600 |

|    |             |             |             |
|----|-------------|-------------|-------------|
| C  | -3.64903200 | 1.45203800  | -2.89454000 |
| H  | -2.63587400 | 1.56400200  | -2.51659400 |
| H  | -4.13574400 | 0.62463300  | -2.36428000 |
| H  | -3.60278700 | 1.19181900  | -3.95876300 |
| C  | -7.37272100 | 3.83393000  | 1.31720200  |
| C  | -8.11730800 | 2.48457200  | 1.21612000  |
| H  | -9.13858500 | 2.57463900  | 1.60482600  |
| H  | -8.18243200 | 2.13855500  | 0.18043700  |
| H  | -7.59638100 | 1.71339100  | 1.79286100  |
| C  | -7.36143900 | 4.26579400  | 2.79236900  |
| H  | -6.84740500 | 3.53236800  | 3.42217000  |
| H  | -6.86869500 | 5.23451900  | 2.92372200  |
| H  | -8.38810200 | 4.36147200  | 3.16089700  |
| C  | -8.14193800 | 4.90173100  | 0.50894700  |
| H  | -8.21308500 | 4.63228600  | -0.54872400 |
| H  | -9.16167200 | 5.01946700  | 0.89420500  |
| H  | -7.63619300 | 5.87037000  | 0.57180000  |
| C  | 4.01350700  | -0.25078500 | 3.55196600  |
| C  | 4.86708700  | 0.27242500  | 2.55869600  |
| C  | 2.93320500  | -1.09561000 | 3.31131300  |
| H  | 4.20469000  | 0.03280900  | 4.57555100  |
| C  | 4.58306600  | -0.08804400 | 1.25555000  |
| C  | 2.67147300  | -1.48462600 | 1.95866200  |
| C  | 3.50636700  | -0.94338300 | 0.93551500  |
| H  | 5.18252300  | 0.29017000  | 0.43442900  |
| O  | 1.68256500  | -2.32210300 | 1.70177500  |
| C  | 3.28338100  | -1.19188000 | -0.45925400 |
| Co | 1.22731700  | -3.10094200 | 0.03554600  |
| N  | 2.41809100  | -2.01138800 | -0.95841100 |
| H  | 3.89850200  | -0.61279400 | -1.14584800 |
| N  | 0.83273200  | -3.94815100 | -1.62411900 |
| C  | 2.21152200  | -2.15821300 | -2.40789600 |
| C  | -0.28220700 | -4.54450100 | -1.88133700 |
| C  | 1.85271500  | -3.63593600 | -2.63156200 |
| C  | 3.38147700  | -1.73972700 | -3.29287500 |
| H  | -0.48148400 | -4.85255200 | -2.90774800 |
| C  | -1.31145500 | -4.83514400 | -0.92123300 |
| C  | 1.49398900  | -3.90539400 | -4.09084600 |
| C  | 3.06845200  | -2.03413600 | -4.76549500 |
| H  | 4.28247400  | -2.28511000 | -2.97948100 |
| H  | 3.57340800  | -0.67282700 | -3.17611500 |
| C  | -2.55518200 | -5.28638800 | -1.41984900 |
| C  | -1.08351300 | -4.71278500 | 0.48144700  |
| C  | 2.67020700  | -3.49670200 | -4.99226000 |
| H  | 1.25902800  | -4.96526300 | -4.23930500 |
| H  | 0.60100500  | -3.32658000 | -4.36012800 |
| H  | 3.93770300  | -1.77617700 | -5.37863600 |
| H  | 2.25199200  | -1.37995400 | -5.09092600 |
| C  | -3.59552700 | -5.60454800 | -0.57083700 |
| H  | -2.67177000 | -5.36061200 | -2.49547700 |
| C  | -2.14513000 | -5.05972700 | 1.37359800  |
| O  | 0.08263300  | -4.30625900 | 0.96187700  |
| H  | 3.52745500  | -4.14958900 | -4.78011100 |
| H  | 2.40185700  | -3.66102300 | -6.04066900 |
| C  | -3.34495600 | -5.48318400 | 0.81476200  |
| H  | -4.15433000 | -5.73143500 | 1.48823800  |
| O  | 2.61525400  | -4.47637500 | 0.48174400  |
| H  | 2.97306400  | -4.07117400 | 1.29199700  |
| H  | 1.95684500  | -5.12221400 | 0.80766800  |
| C  | -1.96662200 | -4.93634000 | 2.89439200  |
| C  | -3.23219000 | -5.35725900 | 3.66164600  |
| H  | -3.05048300 | -5.25020200 | 4.73502400  |
| H  | -4.09232500 | -4.72814000 | 3.41110000  |
| H  | -3.49964700 | -6.40266300 | 3.47481000  |
| C  | -0.81014500 | -5.84502800 | 3.36814300  |
| H  | -1.02063000 | -6.89357900 | 3.13140500  |
| H  | 0.13095300  | -5.56183500 | 2.89732900  |
| H  | -0.69007000 | -5.76009400 | 4.45334700  |
| C  | -1.66428000 | -3.46549400 | 3.25124900  |

|   |             |             |             |
|---|-------------|-------------|-------------|
| H | -0.75521200 | -3.12354500 | 2.76103600  |
| H | -2.49311300 | -2.81678600 | 2.95008000  |
| H | -1.52997300 | -3.36073300 | 4.33276700  |
| C | -4.97633000 | -6.06066900 | -1.05384600 |
| C | -5.28508900 | -7.46036700 | -0.47947700 |
| H | -5.28352000 | -7.46048300 | 0.61432200  |
| H | -6.27314600 | -7.79728100 | -0.81033600 |
| H | -4.54351900 | -8.19180100 | -0.81614200 |
| C | -6.04202200 | -5.05545300 | -0.56448900 |
| H | -7.03830400 | -5.36493200 | -0.89756000 |
| H | -6.06280600 | -4.98524300 | 0.52685800  |
| H | -5.84401400 | -4.05467400 | -0.96044900 |
| C | -5.05135700 | -6.13840700 | -2.58708500 |
| H | -4.87026900 | -5.16362100 | -3.05120000 |
| H | -4.32891100 | -6.85473300 | -2.99219100 |
| H | -6.04915700 | -6.46793300 | -2.89116600 |
| C | 2.02445600  | -1.55564000 | 4.46386500  |
| C | 2.54052900  | -1.07927600 | 5.83439000  |
| H | 3.54095800  | -1.46586900 | 6.05566000  |
| H | 2.56630100  | 0.01259500  | 5.90861300  |
| H | 1.86525700  | -1.44254400 | 6.61465800  |
| C | 0.62086100  | -0.94379200 | 4.26340200  |
| H | 0.67593700  | 0.14903900  | 4.26919700  |
| H | 0.18189400  | -1.25789900 | 3.31911900  |
| H | -0.05027300 | -1.25506400 | 5.07093300  |
| C | 1.93731600  | -3.09826900 | 4.51674200  |
| H | 1.50216500  | -3.50365100 | 3.60518600  |
| H | 2.93382100  | -3.53199700 | 4.66194500  |
| H | 1.31312400  | -3.40737100 | 5.36194400  |
| C | 6.05930100  | 1.18373500  | 2.88394700  |
| C | 7.36601500  | 0.42543100  | 2.56432600  |
| H | 8.23871400  | 1.05052700  | 2.78287800  |
| H | 7.44155800  | -0.48932400 | 3.16097100  |
| H | 7.41059700  | 0.14212900  | 1.50815100  |
| C | 5.99738800  | 2.46677300  | 2.02831300  |
| H | 6.05004600  | 2.24792900  | 0.95878800  |
| H | 5.07372300  | 3.02210400  | 2.21642400  |
| H | 6.84104400  | 3.12246500  | 2.26755500  |
| C | 6.08145700  | 1.60071000  | 4.36424100  |
| H | 6.19830400  | 0.74065500  | 5.03108100  |
| H | 6.92672800  | 2.27163900  | 4.54381900  |
| H | 5.16742900  | 2.13361800  | 4.64672300  |
| C | -1.50704300 | 0.21571400  | 0.08451000  |
| C | -0.20570700 | -0.55013700 | 0.32379100  |
| O | -1.34541800 | 1.37598500  | 0.81250800  |
| H | -1.62104000 | 0.39847400  | -0.99172500 |
| H | 0.62878000  | -0.02073300 | -0.12241400 |
| H | -0.05215200 | -0.68449500 | 1.39159100  |
| C | -2.74117200 | -0.53924000 | 0.59068700  |
| H | -3.62229200 | 0.08640400  | 0.42795900  |
| H | -2.91180700 | -1.49227200 | 0.06466100  |
| H | -2.65353100 | -0.73605900 | 1.66482300  |
| O | -0.20420100 | -1.88084500 | -0.31636600 |
| H | -1.03254200 | -2.32274800 | -0.06499700 |
| H | 0.49953900  | 4.90010300  | 2.02780800  |
| H | 0.24331900  | 1.95590800  | 2.70000600  |
| H | 2.73824600  | -4.22935300 | -2.36367600 |
| H | 1.33095500  | -1.55404300 | -2.66040100 |

**Isolated molecular and some intermediates of structure, energy etc.**

A~B means that the chemical entity, A~B, is formed by A weakly interacting with B via intermolecular forces and/or hydrogen bonds.

**H<sub>2</sub>O**

Charge: 0

Spin Multiplicity: 1

Sum of electronic and thermal Free Energies (a.u.): -76.416603

Thermal correction to Gibbs Free Energy (a.u.): 0.003709

No imaginary frequency

Calculation of single point energy based on the optimized structure, E = -76.4711362 a.u.

|   |            |             |             |
|---|------------|-------------|-------------|
| O | 0.00000000 | 0.00000000  | 0.11919600  |
| H | 0.00000000 | 0.75933400  | -0.47678200 |
| H | 0.00000000 | -0.75933400 | -0.47678200 |

### PO

Charge: 0

Spin Multiplicity: 1

Sum of electronic and thermal Free Energies (a.u.): -193.066994

Thermal correction to Gibbs Free Energy (a.u.): 0.059302

No imaginary frequency

Calculation of single point energy based on the optimized structure, E = -193.2056507 a.u.

|   |             |             |             |
|---|-------------|-------------|-------------|
| C | -0.15201300 | -0.03917900 | 0.49087800  |
| C | 1.04225200  | 0.61600300  | -0.06065700 |
| O | 0.82637400  | -0.78932400 | -0.24349500 |
| H | -0.15457600 | -0.25524000 | 1.56158900  |
| H | 1.87095300  | 0.88338100  | 0.59481000  |
| H | 0.94782200  | 1.22394600  | -0.96079800 |
| C | -1.50818000 | 0.10018800  | -0.14891400 |
| H | -2.07762600 | -0.82981400 | -0.05252800 |
| H | -2.08280100 | 0.90031900  | 0.33021300  |
| H | -1.40712400 | 0.32992900  | -1.21316500 |

### PG

Charge: 0

Spin Multiplicity: 1

Sum of electronic and thermal Free Energies (a.u.): -269.509601

Thermal correction to Gibbs Free Energy (a.u.): 0.085173

No imaginary frequency

Calculation of single point energy based on the optimized structure, E = -269.7152886 a.u.

|   |             |             |             |
|---|-------------|-------------|-------------|
| C | 0.46407200  | 0.05096800  | 0.34340900  |
| C | -0.70807200 | -0.74715600 | -0.22646300 |
| O | 0.41162200  | 1.37779600  | -0.15683700 |
| H | 0.36386900  | 0.05724700  | 1.44687500  |
| H | -0.73239200 | -1.76458300 | 0.18912100  |
| H | -0.60404000 | -0.82052600 | -1.31340000 |
| C | 1.81179000  | -0.54837500 | -0.02526600 |
| H | 2.61902500  | 0.07118700  | 0.37312100  |
| H | 1.91724700  | -1.55936800 | 0.38122300  |
| H | 1.92096000  | -0.59065200 | -1.11335400 |
| O | -1.93954000 | -0.05540800 | -0.00255800 |
| H | -2.13603400 | -0.10766700 | 0.94292100  |
| H | -0.53202200 | 1.60264000  | -0.18142200 |

### CH<sub>3</sub>CHCICH<sub>2</sub>OH

Charge: 0

Spin Multiplicity: 1

Sum of electronic and thermal Free Energies (a.u.): -653.908688

Thermal correction to Gibbs Free Energy (a.u.): 0.070477

No imaginary frequency

Calculation of single point energy based on the optimized structure, E = -654.0946971 a.u.

|    |             |             |             |
|----|-------------|-------------|-------------|
| Cl | 0.81054400  | -1.23911000 | 0.06595800  |
| C  | 0.24266000  | 0.45919100  | -0.37506100 |
| C  | -1.11150000 | 0.69281300  | 0.28751900  |
| O  | -2.11219500 | -0.19559900 | -0.15398900 |
| H  | 0.11576200  | 0.42212500  | -1.45870800 |
| H  | -1.44643800 | 1.69955600  | 0.01147700  |
| H  | -0.98361500 | 0.67074900  | 1.38104100  |
| C  | 1.29798100  | 1.46986800  | 0.03588600  |
| H  | 2.25702100  | 1.25392300  | -0.43867900 |
| H  | 0.97883800  | 2.47212500  | -0.27156100 |
| H  | 1.43956700  | 1.46853800  | 1.12018700  |
| H  | -1.81766500 | -1.08858900 | 0.07680100  |

### Co<sup>III</sup>(salen)-Cl

Charge: 0

Spin Multiplicity: 1

Sum of electronic and thermal Free Energies (a.u.): -1639.339142

Thermal correction to Gibbs Free Energy (a.u.): 0.318787

No imaginary frequency

Calculation of single point energy based on the optimized structure, E = -2877.8318294 a.u.

|    |             |             |             |
|----|-------------|-------------|-------------|
| C  | 4.71828000  | -2.85691000 | -0.28450700 |
| C  | 5.40577200  | -1.64253300 | -0.06581200 |
| C  | 3.34370100  | -2.89308800 | -0.39219000 |
| H  | 5.28240100  | -3.78214900 | -0.36368400 |
| C  | 4.68107000  | -0.47531800 | 0.03692800  |
| C  | 2.56883000  | -1.70580300 | -0.28635400 |
| C  | 3.26858600  | -0.47402100 | -0.07077500 |
| H  | 5.18778100  | 0.47202300  | 0.20580400  |
| O  | 1.27970300  | -1.79553100 | -0.41938600 |
| C  | 2.57812500  | 0.76752900  | 0.03090300  |
| Co | 0.00841400  | -0.46857200 | -0.16405600 |
| N  | 1.29234300  | 0.92723100  | -0.04827200 |
| H  | 3.20049500  | 1.64811000  | 0.19198400  |
| N  | -1.27111300 | 0.92042800  | -0.37653500 |
| C  | 0.65045200  | 2.22173000  | 0.23528600  |
| C  | -2.55598900 | 0.76565300  | -0.27770900 |
| C  | -0.64502200 | 2.23608800  | -0.58653400 |
| C  | 1.47998900  | 3.48015800  | -0.02145600 |
| H  | -3.19241900 | 1.65007400  | -0.30921500 |
| C  | -3.22343900 | -0.48718700 | -0.15701100 |
| C  | -1.49134400 | 3.46824800  | -0.26634200 |
| C  | 0.64245200  | 4.73139300  | 0.28416200  |
| H  | 1.81215500  | 3.49126300  | -1.06818100 |
| H  | 2.37761900  | 3.48664500  | 0.60449500  |
| C  | -4.62479600 | -0.49935600 | 0.04375800  |
| C  | -2.51382800 | -1.72207900 | -0.31965700 |
| C  | -0.67047800 | 4.74424300  | -0.50662400 |
| H  | -2.39142200 | 3.49203500  | -0.88915300 |
| H  | -1.81839600 | 3.41900200  | 0.78031300  |
| H  | 1.22732000  | 5.63041300  | 0.06392700  |
| H  | 0.41861800  | 4.75696100  | 1.35864600  |
| C  | -5.32888200 | -1.68291000 | 0.09456800  |
| H  | -5.14002700 | 0.45128800  | 0.16013800  |
| C  | -3.26931600 | -2.92496300 | -0.27950100 |
| O  | -1.23555200 | -1.79620200 | -0.54274500 |
| H  | -0.44810500 | 4.83110300  | -1.57856500 |
| H  | -1.26688500 | 5.62244100  | -0.23873100 |
| C  | -4.63316400 | -2.90049900 | -0.07350100 |
| H  | -5.18213500 | -3.83743900 | -0.03605600 |
| H  | 0.36268500  | 2.18569700  | 1.29529400  |
| H  | -0.35368800 | 2.27901600  | -1.64756700 |
| Cl | -0.19158900 | -0.54441900 | 2.02500800  |
| H  | 6.48668200  | -1.63252600 | 0.02196000  |
| H  | 2.80752900  | -3.82145300 | -0.55467300 |
| H  | -2.72704400 | -3.85551200 | -0.40485600 |
| H  | -6.40114100 | -1.68241600 | 0.25740100  |

## H<sub>2</sub>O-Co<sup>III</sup>-Cl

Charge: 0

Spin Multiplicity: 1

Sum of electronic and thermal Free Energies (a.u.): -1715.775582

Thermal correction to Gibbs Free Energy (a.u.): 0.343606

No imaginary frequency

Calculation of single point energy based on the optimized structure, E = -2954.3231536 a.u.

|    |            |             |             |
|----|------------|-------------|-------------|
| C  | 4.74102300 | -2.78048200 | 0.03670300  |
| C  | 5.37513600 | -1.57527800 | 0.40140700  |
| C  | 3.39341400 | -2.81972400 | -0.26421400 |
| H  | 5.32025800 | -3.69907400 | -0.00270300 |
| C  | 4.62244800 | -0.42125000 | 0.45444000  |
| C  | 2.59492000 | -1.64763600 | -0.21761100 |
| C  | 3.23888300 | -0.42483100 | 0.15357500  |
| H  | 5.08584400 | 0.52118400  | 0.73743300  |
| O  | 1.33569200 | -1.74140700 | -0.55084400 |
| C  | 2.53124800 | 0.81416700  | 0.23978000  |
| Co | 0.00811600 | -0.40725000 | -0.29584200 |
| N  | 1.26805300 | 0.99039100  | 0.02554100  |

|    |             |             |             |
|----|-------------|-------------|-------------|
| H  | 3.12952900  | 1.67811800  | 0.53290200  |
| N  | -1.31415000 | 0.96088500  | -0.27607600 |
| C  | 0.60161500  | 2.26701100  | 0.33089100  |
| C  | -2.57114100 | 0.77355300  | -0.04389300 |
| C  | -0.70450800 | 2.27743500  | -0.47856300 |
| C  | 1.41233700  | 3.53765900  | 0.06622800  |
| H  | -3.21940800 | 1.64465700  | 0.05751500  |
| C  | -3.20124500 | -0.50630100 | 0.07524600  |
| C  | -1.55893700 | 3.49777400  | -0.13977000 |
| C  | 0.56747600  | 4.78054700  | 0.38459000  |
| H  | 1.72672000  | 3.54959000  | -0.98568200 |
| H  | 2.32084200  | 3.55436200  | 0.67572300  |
| C  | -4.55215000 | -0.56039700 | 0.48674700  |
| C  | -2.51446400 | -1.70903200 | -0.28298100 |
| C  | -0.75584700 | 4.78298700  | -0.38944100 |
| H  | -2.47066700 | 3.50740900  | -0.74652200 |
| H  | -1.86657400 | 3.44577100  | 0.91281600  |
| H  | 1.14128300  | 5.68529800  | 0.15842800  |
| H  | 0.35673100  | 4.80284300  | 1.46192800  |
| C  | -5.22905700 | -1.76055400 | 0.56966900  |
| H  | -5.05244300 | 0.36975400  | 0.74651400  |
| C  | -3.23565200 | -2.92457800 | -0.20001500 |
| O  | -1.28286000 | -1.73491700 | -0.72913600 |
| H  | -0.54823400 | 4.87322400  | -1.46396200 |
| H  | -1.35701800 | 5.65498400  | -0.11188200 |
| C  | -4.55369500 | -2.94567100 | 0.21827200  |
| H  | -5.07531100 | -3.89690000 | 0.28065500  |
| Cl | -0.15490000 | -0.70009100 | 1.91022100  |
| O  | 0.13752700  | -0.29749700 | -2.34132200 |
| H  | -0.63862000 | -0.88503400 | -2.43949100 |
| H  | 0.89036700  | -0.91964900 | -2.36906000 |
| H  | 0.32440100  | 2.21943200  | 1.39338700  |
| H  | -0.42471000 | 2.32300600  | -1.54111100 |
| H  | 6.43285900  | -1.55932800 | 0.64010700  |
| H  | 2.89927100  | -3.74581500 | -0.53716800 |
| H  | -2.70977100 | -3.83496300 | -0.46601600 |
| H  | -6.26220800 | -1.79234400 | 0.89796500  |

### PO-Co<sup>III</sup>-Cl

Charge: 0

Spin Multiplicity: 1

Sum of electronic and thermal Free Energies (a.u.): -1832.422024

Thermal correction to Gibbs Free Energy (a.u.): 0.401570

No imaginary frequency

Calculation of single point energy based on the optimized structure, E = -3071.0652169 a.u.

|    |             |             |             |
|----|-------------|-------------|-------------|
| C  | -4.84127500 | -2.28938200 | -0.63609500 |
| C  | -5.42652400 | -1.00967300 | -0.53157100 |
| C  | -3.47104100 | -2.45120600 | -0.66816000 |
| H  | -5.48028700 | -3.16645300 | -0.69766900 |
| C  | -4.59815600 | 0.09030400  | -0.46438700 |
| C  | -2.58830000 | -1.33523900 | -0.58813000 |
| C  | -3.18816100 | -0.03664100 | -0.48230300 |
| H  | -5.02264700 | 1.08949400  | -0.39321000 |
| O  | -1.31252000 | -1.56455000 | -0.60427000 |
| C  | -2.40461500 | 1.15824000  | -0.42542100 |
| Co | 0.04042600  | -0.29678600 | -0.24744100 |
| N  | -1.11673500 | 1.21243100  | -0.35136700 |
| H  | -2.96320200 | 2.09471100  | -0.45415400 |
| N  | 1.39160500  | 0.95753800  | 0.25234300  |
| C  | -0.35802600 | 2.46590200  | -0.39451000 |
| C  | 2.66283200  | 0.72199400  | 0.21798300  |
| C  | 0.82208400  | 2.27084700  | 0.57462200  |
| C  | -1.12663500 | 3.74923800  | -0.08217200 |
| H  | 3.35106700  | 1.54449800  | 0.41614300  |
| C  | 3.26457300  | -0.54623400 | -0.05293600 |
| C  | 1.77548500  | 3.46491500  | 0.53696800  |
| C  | -0.17493700 | 4.95415500  | -0.11162100 |
| H  | -1.59526800 | 3.66419400  | 0.90776400  |
| H  | -1.92985200 | 3.90043300  | -0.81049000 |



|    |             |             |             |
|----|-------------|-------------|-------------|
| C  | 4.67471900  | -0.61097800 | -0.15501800 |
| C  | 2.48392100  | -1.74273900 | -0.16946500 |
| C  | 1.01055000  | 4.76166500  | 0.84072700  |
| H  | 2.58383600  | 3.33603600  | 1.26469500  |
| H  | 2.23703500  | 3.52512100  | -0.45709800 |
| H  | -0.72384100 | 5.86638400  | 0.14464000  |
| H  | 0.20024400  | 5.08909800  | -1.13444000 |
| C  | 5.32687000  | -1.80558200 | -0.37610600 |
| H  | 5.24185500  | 0.31245200  | -0.06009400 |
| C  | 3.18402800  | -2.95879700 | -0.38953500 |
| O  | 1.18977300  | -1.78414800 | -0.03474500 |
| H  | 0.64355700  | 4.72929600  | 1.87552300  |
| H  | 1.69256900  | 5.61595900  | 0.77716700  |
| C  | 4.56088800  | -2.98441100 | -0.49089300 |
| H  | 5.06227000  | -3.93212000 | -0.66856800 |
| C  | -0.74440600 | -1.82013400 | 2.21184400  |
| C  | 0.39041400  | -1.03575000 | 2.71212800  |
| O  | -0.49866200 | -0.46318900 | 1.71238400  |
| H  | -0.51203100 | -2.55750700 | 1.44924800  |
| H  | 1.38424600  | -1.25891500 | 2.33991000  |
| H  | 0.32273700  | -0.52922000 | 3.67190500  |
| C  | -2.03604500 | -1.98088500 | 2.95715300  |
| H  | -2.87027800 | -2.00873900 | 2.25021700  |
| H  | -2.02845600 | -2.92426400 | 3.51326300  |
| H  | -2.19339400 | -1.15891800 | 3.66097500  |
| H  | 0.39474100  | 2.18878400  | 1.58578700  |
| H  | 0.06354300  | 2.52694700  | -1.40657000 |
| Cl | 0.55481600  | -0.04568200 | -2.40987900 |
| H  | -6.50480600 | -0.89574400 | -0.51273100 |
| H  | -3.01702400 | -3.43227500 | -0.75881000 |
| H  | 2.59026100  | -3.86130100 | -0.48579200 |
| H  | 6.40748000  | -1.84046600 | -0.46117000 |

**H<sub>2</sub>O-Co<sup>III</sup>-Cl-PO** one intermediate structure in the formation of H<sub>2</sub>O-Co<sup>III</sup>-OH

Charge: 0

Spin Multiplicity: 1

Sum of electronic and thermal Free Energies (a.u.): -1908.838734

Thermal correction to Gibbs Free Energy (a.u.): 0.422398

No imaginary frequency

Calculation of single point energy based on the optimized structure, E = -3147.5358591 a.u.

|    |             |             |             |
|----|-------------|-------------|-------------|
| C  | -1.82611100 | 4.86683000  | -0.12089900 |
| C  | -0.58101600 | 5.40939200  | -0.49627100 |
| C  | -1.95334400 | 3.53409800  | 0.22306300  |
| H  | -2.70550700 | 5.50499600  | -0.10655800 |
| C  | 0.52413200  | 4.58358200  | -0.51683800 |
| C  | -0.83356200 | 2.66463800  | 0.20794900  |
| C  | 0.43055400  | 3.21364500  | -0.17430300 |
| H  | 1.49526900  | 4.97798300  | -0.80700400 |
| O  | -1.00609700 | 1.42356100  | 0.57993800  |
| C  | 1.62208000  | 2.42211400  | -0.23320500 |
| Co | 0.21933100  | 0.00003900  | 0.30363100  |
| N  | 1.70969000  | 1.15376900  | 0.00258700  |
| H  | 2.52731100  | 2.95570400  | -0.52759000 |
| N  | 1.47336800  | -1.42505500 | 0.27476200  |
| C  | 2.93627200  | 0.39182400  | -0.28692200 |
| C  | 1.18229900  | -2.66070700 | 0.03178100  |
| C  | 2.83057100  | -0.92305900 | 0.50257700  |
| C  | 4.26038600  | 1.09735200  | 0.01416200  |
| H  | 1.99702300  | -3.37966700 | -0.06299700 |
| C  | -0.14513300 | -3.17729500 | -0.11582900 |
| C  | 3.98504200  | -1.86545000 | 0.16621500  |
| C  | 5.43900700  | 0.16358800  | -0.30094200 |
| H  | 4.27778800  | 1.38991400  | 1.07224000  |
| H  | 4.35742100  | 2.01337100  | -0.57637800 |
| C  | -0.30940200 | -4.50935700 | -0.56025100 |
| C  | -1.29236900 | -2.39717800 | 0.22644800  |
| C  | 5.32537000  | -1.16947200 | 0.44773400  |
| H  | 3.91394600  | -2.78417300 | 0.75800700  |
| H  | 3.92458000  | -2.15184600 | -0.89187600 |

|    |             |             |             |
|----|-------------|-------------|-------------|
| H  | 6.38182000  | 0.66055800  | -0.04984300 |
| H  | 5.46303100  | -0.02891000 | -1.38166100 |
| C  | -1.56509500 | -5.06666100 | -0.69391900 |
| H  | 0.57772500  | -5.08816300 | -0.80703000 |
| C  | -2.56969300 | -2.98663500 | 0.08493000  |
| O  | -1.21064300 | -1.17594400 | 0.71098200  |
| H  | 5.41545900  | -0.98882900 | 1.52713400  |
| H  | 6.15174500  | -1.83220000 | 0.17088300  |
| C  | -2.69355200 | -4.28881600 | -0.36775000 |
| H  | -3.68654100 | -4.71615600 | -0.47805800 |
| Cl | -0.06521900 | -0.10907100 | -1.90832700 |
| O  | 0.33884600  | 0.09041700  | 2.35029500  |
| H  | -0.31030400 | -0.63580500 | 2.44111100  |
| H  | -0.21426200 | 0.89422500  | 2.39303400  |
| H  | 2.88870000  | 0.13387000  | -1.35426700 |
| H  | 2.88363900  | -0.66296800 | 1.56977400  |
| H  | -0.49572500 | 6.45571300  | -0.76806900 |
| H  | -2.90945000 | 3.10745100  | 0.50587500  |
| H  | -3.43703600 | -2.37690000 | 0.32080700  |
| H  | -1.68258100 | -6.08540000 | -1.04739000 |
| C  | -4.62310700 | 0.59569200  | -0.08993000 |
| C  | -4.09892400 | 0.43191500  | 1.27406300  |
| O  | -4.88399700 | -0.60666700 | 0.65990900  |
| H  | -5.51554000 | 1.21489100  | -0.21289900 |
| H  | -4.58529600 | 0.94001200  | 2.10820600  |
| H  | -3.04404500 | 0.20038100  | 1.38811400  |
| C  | -3.73528700 | 0.47397700  | -1.29876100 |
| H  | -4.26732100 | -0.01514800 | -2.12201600 |
| H  | -3.42264200 | 1.46683300  | -1.63920200 |
| H  | -2.83340200 | -0.09261800 | -1.06786500 |

### CH<sub>3</sub>CHOAcCH<sub>2</sub>OH

Charge: 0

Spin Multiplicity: 1

Sum of electronic and thermal Free Energies (a.u.): -422.156326

Thermal correction to Gibbs Free Energy (a.u.): 0.117498

No imaginary frequency

Calculation of single point energy based on the optimized structure, E = -422.4504619 a.u.

|   |             |             |             |
|---|-------------|-------------|-------------|
| H | -0.19410800 | 1.93459200  | 0.43385000  |
| C | -1.02363600 | -0.39496600 | 0.30452800  |
| C | -1.60311600 | 0.85470600  | -0.35780300 |
| O | -0.71885200 | 1.95507100  | -0.38093000 |
| H | -0.82982600 | -0.19078100 | 1.36240200  |
| H | -2.54633500 | 1.09379200  | 0.16259100  |
| H | -1.85412000 | 0.62693500  | -1.40065600 |
| C | -1.91906800 | -1.61163900 | 0.14498200  |
| H | -2.06085100 | -1.85059200 | -0.91308600 |
| H | -1.47864800 | -2.48056600 | 0.63959900  |
| H | -2.89903700 | -1.42026600 | 0.59174100  |
| C | 2.57968200  | -0.54569300 | -0.57740600 |
| H | 2.58842900  | -1.62690600 | -0.73161600 |
| H | 3.46769700  | -0.22579300 | -0.03378100 |
| H | 2.56824000  | -0.06996400 | -1.56326200 |
| C | 1.34766500  | -0.12343700 | 0.17898900  |
| O | 0.24852300  | -0.72690700 | -0.31467200 |
| O | 1.33900400  | 0.66380100  | 1.10716200  |

### Co<sup>III</sup>(salen)-OAc

Charge: 0

Spin Multiplicity: 1

Sum of electronic and thermal Free Energies (a.u.): -1407.569499

Thermal correction to Gibbs Free Energy (a.u.): 0.365073

No imaginary frequency

Calculation of single point energy based on the optimized structure, E = -2646.1700493 a.u.

|   |            |             |             |
|---|------------|-------------|-------------|
| C | 4.71980500 | -2.74575300 | -0.67220400 |
| C | 5.42578400 | -1.55430900 | -0.40168600 |
| C | 3.34141200 | -2.76088300 | -0.74688000 |
| H | 5.27000600 | -3.67087000 | -0.82017600 |
| C | 4.71573800 | -0.38817000 | -0.21226700 |

|    |             |             |             |
|----|-------------|-------------|-------------|
| H  | 6.50848900  | -1.55939700 | -0.34067900 |
| C  | 2.58439900  | -1.57520800 | -0.55375000 |
| H  | 2.79248800  | -3.67323700 | -0.95289700 |
| C  | 3.30179000  | -0.36673600 | -0.28533500 |
| H  | 5.23643900  | 0.54255400  | 0.00034200  |
| O  | 1.28607100  | -1.64877000 | -0.64963100 |
| C  | 2.62598900  | 0.87300700  | -0.07834900 |
| Co | 0.02672900  | -0.30538700 | -0.37402400 |
| N  | 1.34383300  | 1.05069400  | -0.13595000 |
| H  | 3.25989800  | 1.72993500  | 0.15134600  |
| N  | -1.21105300 | 1.13702600  | -0.55761800 |
| C  | 0.70666400  | 2.31362500  | 0.26562600  |
| C  | -2.49763400 | 1.01050100  | -0.48049900 |
| C  | -0.54365900 | 2.44786300  | -0.61610100 |
| C  | 1.56922700  | 3.57420000  | 0.20978400  |
| H  | -3.11220900 | 1.91049600  | -0.45362000 |
| C  | -3.20144000 | -0.23158200 | -0.45253600 |
| C  | -1.37935200 | 3.66477800  | -0.21885800 |
| C  | 0.73446100  | 4.80291100  | 0.60081700  |
| H  | 1.97057600  | 3.69837700  | -0.80522900 |
| H  | 2.42276200  | 3.48574700  | 0.88923100  |
| C  | -4.60495700 | -0.21603600 | -0.27544400 |
| C  | -2.52423100 | -1.47271600 | -0.67624200 |
| C  | -0.51875900 | 4.93569900  | -0.27077600 |
| H  | -2.23911000 | 3.77699300  | -0.88764900 |
| H  | -1.77005800 | 3.51655700  | 0.79616100  |
| H  | 1.34868300  | 5.70602700  | 0.52438900  |
| H  | 0.43644100  | 4.71236600  | 1.65339300  |
| C  | -5.34378600 | -1.38034400 | -0.30573600 |
| H  | -5.09573200 | 0.74032200  | -0.11086700 |
| C  | -3.31224400 | -2.65293300 | -0.72279400 |
| O  | -1.23909300 | -1.57397400 | -0.86457500 |
| H  | -0.22091800 | 5.12747600  | -1.31035100 |
| H  | -1.11472500 | 5.79695200  | 0.04811500  |
| C  | -4.68004900 | -2.60325400 | -0.53636600 |
| H  | -6.41798200 | -1.35798300 | -0.15886100 |
| H  | -2.79536600 | -3.58938900 | -0.90169900 |
| H  | -5.25402300 | -3.52531300 | -0.56540600 |
| O  | -0.23960100 | -0.27333100 | 1.44162400  |
| C  | -0.30845400 | -1.28403300 | 2.30769800  |
| O  | -0.35930200 | -1.01168400 | 3.49676900  |
| C  | -0.37443300 | -2.71137800 | 1.80519500  |
| H  | -0.13567500 | -3.37689400 | 2.63559400  |
| H  | -1.39435800 | -2.92142400 | 1.46912500  |
| H  | 0.28833000  | -2.88026600 | 0.95764000  |
| H  | -0.19747400 | 2.58181100  | -1.65262700 |
| H  | 0.36013000  | 2.14715700  | 1.29507600  |

### H<sub>2</sub>O-Co<sup>III</sup>-OAc

Charge: 0

Spin Multiplicity: 1

Sum of electronic and thermal Free Energies (a.u.): -1484.005932

Thermal correction to Gibbs Free Energy (a.u.): 0.389430

No imaginary frequency

Calculation of single point energy based on the optimized structure, E = -2722.6625802 a.u.

|    |             |             |             |
|----|-------------|-------------|-------------|
| C  | 4.74089900  | -2.62222600 | -0.35182800 |
| C  | 5.37409400  | -1.45805700 | 0.12477500  |
| C  | 3.39368800  | -2.62910400 | -0.66251000 |
| H  | 5.31780900  | -3.53504200 | -0.47244800 |
| C  | 4.62272800  | -0.31119900 | 0.27982600  |
| C  | 2.59975200  | -1.46497800 | -0.51098200 |
| C  | 3.24218700  | -0.28352100 | -0.02859000 |
| H  | 5.08627200  | 0.59955300  | 0.65168300  |
| O  | 1.33451800  | -1.52786700 | -0.84531900 |
| C  | 2.53311700  | 0.94463800  | 0.17218000  |
| Co | 0.00430900  | -0.21149900 | -0.50518300 |
| N  | 1.27734900  | 1.14609100  | -0.04987000 |
| H  | 3.12827400  | 1.76992800  | 0.56580400  |
| N  | -1.30498400 | 1.17014300  | -0.39583600 |

|   |             |             |             |
|---|-------------|-------------|-------------|
| C | 0.60475700  | 2.38134000  | 0.38509400  |
| C | -2.55198500 | 0.97101900  | -0.13428500 |
| C | -0.67835600 | 2.49247100  | -0.45435000 |
| C | 1.42911300  | 3.66792700  | 0.29628800  |
| H | -3.19062600 | 1.83148400  | 0.06874800  |
| C | -3.19087800 | -0.31288300 | -0.11396200 |
| C | -1.53203800 | 3.68130100  | -0.01657300 |
| C | 0.57936100  | 4.87694500  | 0.71540500  |
| H | 1.78638000  | 3.79364600  | -0.73444800 |
| H | 2.31165300  | 3.60868800  | 0.94029100  |
| C | -4.53180800 | -0.39379800 | 0.32180600  |
| C | -2.52673600 | -1.48180100 | -0.59959500 |
| C | -0.71127800 | 4.97608800  | -0.10518800 |
| H | -2.42567800 | 3.76118400  | -0.64503100 |
| H | -1.87010600 | 3.52597900  | 1.01632900  |
| H | 1.16754800  | 5.79466600  | 0.61173500  |
| H | 0.32552400  | 4.78422900  | 1.77950000  |
| C | -5.22253600 | -1.59003000 | 0.30455300  |
| H | -5.01525700 | 0.51175000  | 0.68086500  |
| C | -3.26303500 | -2.69083100 | -0.62528200 |
| O | -1.29568400 | -1.48268600 | -1.05204100 |
| H | -0.46120500 | 5.17326500  | -1.15614500 |
| H | -1.31622000 | 5.82183900  | 0.23758600  |
| C | -4.57271000 | -2.74032500 | -0.17973000 |
| H | -5.10492100 | -3.68733900 | -0.20136300 |
| O | -0.18890600 | -0.42855800 | 1.32553800  |
| C | -0.09000300 | -1.50477300 | 2.09619500  |
| O | 0.03955900  | -1.36261200 | 3.30339400  |
| C | -0.22483500 | -2.88440800 | 1.47586600  |
| H | 0.19827200  | -3.61670500 | 2.16491500  |
| H | -1.29060300 | -3.10365800 | 1.35172000  |
| H | 0.24310400  | -2.94654900 | 0.49519300  |
| H | -0.37079900 | 2.63915000  | -1.49973600 |
| H | 0.29703100  | 2.20392200  | 1.42472800  |
| O | 0.17283800  | 0.06352700  | -2.54829000 |
| H | -0.61556800 | -0.48880600 | -2.71310100 |
| H | 0.91074000  | -0.57203100 | -2.61358700 |
| H | -6.24769000 | -1.64240300 | 0.65416700  |
| H | -2.75693900 | -3.57571800 | -0.99563900 |
| H | 2.90037500  | -3.52516500 | -1.02356200 |
| H | 6.43015700  | -1.46622600 | 0.37074300  |

### PO-Co<sup>III</sup>-OAc

Charge: 0

Spin Multiplicity: 1

Sum of electronic and thermal Free Energies (a.u.): -1600.652466

Thermal correction to Gibbs Free Energy (a.u.): 0.447883

No imaginary frequency

Calculation of single point energy based on the optimized structure, E = -2839.4045331 a.u.

|    |             |             |             |
|----|-------------|-------------|-------------|
| C  | 4.82779100  | -2.29748200 | 0.41210600  |
| C  | 5.43519800  | -1.02689700 | 0.35485600  |
| C  | 3.45329600  | -2.43391200 | 0.44617000  |
| H  | 5.44984000  | -3.18839600 | 0.43334200  |
| C  | 4.62672000  | 0.09133600  | 0.34022500  |
| C  | 2.59456000  | -1.29990300 | 0.41638100  |
| C  | 3.21635000  | -0.01089600 | 0.36099200  |
| H  | 5.06967500  | 1.08442400  | 0.31012100  |
| O  | 1.30954600  | -1.50306700 | 0.43758500  |
| C  | 2.44843400  | 1.19928700  | 0.37617000  |
| Co | -0.01290100 | -0.21271800 | 0.03281600  |
| N  | 1.16459200  | 1.26757500  | 0.28506200  |
| H  | 3.01575200  | 2.12483700  | 0.48423800  |
| N  | -1.30636300 | 1.09815000  | -0.50072700 |
| C  | 0.40223600  | 2.51024900  | 0.41542700  |
| C  | -2.58012700 | 0.88965800  | -0.52160300 |
| C  | -0.70530000 | 2.42862000  | -0.65373200 |
| C  | 1.18904100  | 3.81509000  | 0.30923600  |
| H  | -3.24747500 | 1.73733000  | -0.68154900 |
| C  | -3.21770400 | -0.38337300 | -0.36240100 |

|   |             |             |             |
|---|-------------|-------------|-------------|
| C | -1.65353600 | 3.62414100  | -0.56335300 |
| C | 0.23651900  | 5.01589700  | 0.39782100  |
| H | 1.73281100  | 3.84011300  | -0.64531400 |
| H | 1.93327000  | 3.87506700  | 1.11013000  |
| C | -4.63113500 | -0.42354700 | -0.33529100 |
| C | -2.46849900 | -1.60086800 | -0.28065500 |
| C | -0.86530400 | 4.93813300  | -0.66480000 |
| H | -2.40391300 | 3.58111800  | -1.36033600 |
| H | -2.18938500 | 3.58436100  | 0.39374700  |
| H | 0.80274300  | 5.94703700  | 0.29109500  |
| H | -0.22172400 | 5.03730000  | 1.39495600  |
| C | -5.31793900 | -1.61535200 | -0.22353900 |
| H | -5.17507200 | 0.51613500  | -0.39996100 |
| C | -3.20127200 | -2.81267400 | -0.17864600 |
| O | -1.16695400 | -1.66246100 | -0.32805400 |
| H | -0.41379000 | 5.01304000  | -1.66339300 |
| H | -1.55029300 | 5.78666500  | -0.56637500 |
| C | -4.58324100 | -2.81500200 | -0.14821600 |
| H | -5.11037800 | -3.76102000 | -0.05881000 |
| O | -0.59886600 | 0.09783600  | 1.76931600  |
| C | -0.74898500 | -0.69115300 | 2.82400900  |
| O | -0.96055500 | -0.18485100 | 3.91749600  |
| C | -0.72146900 | -2.19786700 | 2.64436200  |
| H | -0.59569500 | -2.65907000 | 3.62497800  |
| H | -1.67929500 | -2.52245100 | 2.22574400  |
| H | 0.06338400  | -2.50799000 | 1.95628500  |
| H | -0.20645500 | 2.43980200  | -1.63478600 |
| H | -0.09046700 | 2.44703900  | 1.39428300  |
| C | 0.92547800  | -1.63423200 | -2.46087900 |
| C | -0.16653700 | -0.80593900 | -2.98494900 |
| O | 0.66780400  | -0.30270700 | -1.90533000 |
| H | 0.63980400  | -2.40829500 | -1.75477100 |
| H | -1.18473400 | -1.02982500 | -2.68663100 |
| H | -0.03275700 | -0.25408200 | -3.91221800 |
| C | 2.25398400  | -1.77746400 | -3.14317600 |
| H | 3.04932700  | -1.85727900 | -2.39685700 |
| H | 2.26242100  | -2.68898700 | -3.75012900 |
| H | 2.45973900  | -0.92157200 | -3.79188000 |
| H | 6.51520100  | -0.93180200 | 0.33318800  |
| H | 2.98211600  | -3.40989700 | 0.49692200  |
| H | -2.63127100 | -3.73337900 | -0.11537100 |
| H | -6.40182500 | -1.63001100 | -0.19421700 |

**H<sub>2</sub>O-Co<sup>III</sup>-OAc~PO** one intermediate structure in the formation of H<sub>2</sub>O-Co<sup>III</sup>-OH

Charge: 0

Spin Multiplicity: 1

Sum of electronic and thermal Free Energies (a.u.): -1677.065877

Thermal correction to Gibbs Free Energy (a.u.): 0.466541

No imaginary frequency

Calculation of single point energy based on the optimized structure, E = -2915.8744208 a.u.

|    |             |             |             |
|----|-------------|-------------|-------------|
| C  | -0.78738500 | -5.17102100 | 0.06105500  |
| C  | 0.56094400  | -5.50106200 | 0.29685900  |
| C  | -1.17305800 | -3.86507700 | -0.17947400 |
| H  | -1.54112900 | -5.95351100 | 0.07353500  |
| C  | 1.50260800  | -4.49205000 | 0.28645300  |
| C  | -0.22499200 | -2.81205400 | -0.19681000 |
| C  | 1.14316700  | -3.14565300 | 0.04305000  |
| H  | 2.54927200  | -4.72043700 | 0.47327200  |
| O  | -0.65001100 | -1.59962300 | -0.45622800 |
| C  | 2.18138900  | -2.15677100 | 0.07162500  |
| Co | 0.35886600  | 0.01019700  | -0.34011500 |
| N  | 2.03431100  | -0.89027600 | -0.12751400 |
| H  | 3.17902400  | -2.53246000 | 0.30365200  |
| N  | 1.37802200  | 1.61476500  | -0.44229600 |
| C  | 3.11825400  | 0.07140100  | 0.13271700  |
| C  | 0.91676600  | 2.78182700  | -0.14113900 |
| C  | 2.79163800  | 1.32608900  | -0.69483000 |
| C  | 4.54049800  | -0.41678900 | -0.15053900 |
| H  | 1.61527700  | 3.61490300  | -0.05488300 |

|   |             |             |             |
|---|-------------|-------------|-------------|
| C | -0.46891800 | 3.09549000  | 0.05660800  |
| C | 3.78587200  | 2.45184800  | -0.41567800 |
| C | 5.55215600  | 0.71023300  | 0.10619400  |
| H | 4.60354100  | -0.75316500 | -1.19404200 |
| H | 4.78952800  | -1.27382300 | 0.48254100  |
| C | -0.81476400 | 4.39612300  | 0.48799200  |
| C | -1.49814400 | 2.16126700  | -0.27133600 |
| C | 5.21600700  | 1.97010200  | -0.69936900 |
| H | 3.55615900  | 3.32571300  | -1.03485500 |
| H | 3.69926600  | 2.76119100  | 0.63408600  |
| H | 6.56147700  | 0.36175300  | -0.13610700 |
| H | 5.55170600  | 0.95402600  | 1.17662800  |
| C | -2.13492800 | 4.78493600  | 0.60284900  |
| H | -0.01516900 | 5.09171100  | 0.73175500  |
| C | -2.84372800 | 2.59187800  | -0.18659200 |
| O | -1.25473400 | 0.93800800  | -0.68574900 |
| H | 5.31833100  | 1.75578900  | -1.77154800 |
| H | 5.92797300  | 2.76952400  | -0.46977100 |
| C | -3.14580300 | 3.87144500  | 0.24800700  |
| H | -4.18734800 | 4.17386100  | 0.31418500  |
| O | 0.42091100  | 0.21385000  | 1.50438600  |
| C | -0.44656800 | -0.07111400 | 2.46495900  |
| O | -0.06947700 | -0.08685500 | 3.62757700  |
| C | -1.90144900 | -0.30068100 | 2.10137000  |
| H | -2.41811000 | -0.71744200 | 2.96649600  |
| H | -2.35669600 | 0.66111700  | 1.84579300  |
| H | -1.99940100 | -0.95267000 | 1.23475700  |
| H | 2.86127400  | 1.04295200  | -1.75515600 |
| H | 3.01926900  | 0.34751000  | 1.19127300  |
| O | 0.34339700  | -0.15835500 | -2.40181500 |
| H | -0.40399300 | 0.46791600  | -2.46874700 |
| H | -0.09471900 | -1.02907500 | -2.38619600 |
| H | -2.38945100 | 5.78141200  | 0.94699600  |
| H | -3.61863200 | 1.89360900  | -0.48855100 |
| H | -2.21147400 | -3.60449800 | -0.35567600 |
| H | 0.85144000  | -6.52778500 | 0.48976800  |
| C | -5.12788500 | -0.97772100 | -0.81047400 |
| C | -3.82534300 | -0.94612100 | -1.49124100 |
| O | -4.76650200 | 0.13650600  | -1.64149200 |
| H | -5.90717300 | -1.60576600 | -1.24934200 |
| H | -3.68180000 | -1.55026100 | -2.38885300 |
| H | -2.92135300 | -0.69993100 | -0.94199200 |
| C | -5.27552100 | -0.70226100 | 0.66264800  |
| H | -6.22045800 | -0.18740700 | 0.86678600  |
| H | -5.27042100 | -1.63799300 | 1.23236100  |
| H | -4.45547800 | -0.07733000 | 1.02075600  |

### CH<sub>3</sub>CHOTsCH<sub>2</sub>OH

Charge: 0

Spin Multiplicity: 1

Sum of electronic and thermal Free Energies (a.u.): -1088.406997

Thermal correction to Gibbs Free Energy (a.u.): 0.187996

No imaginary frequency

Calculation of single point energy based on the optimized structure, E = -1088.9507578 a.u.

|   |             |             |             |
|---|-------------|-------------|-------------|
| H | -2.95601300 | 1.65618700  | -0.41734000 |
| C | -2.68301200 | -1.01501000 | -0.06148300 |
| C | -3.63610200 | -0.11919500 | -0.85166600 |
| O | -3.79188300 | 1.17129300  | -0.31201200 |
| H | -2.86774300 | -0.89261800 | 1.00976900  |
| H | -4.62688000 | -0.58726700 | -0.82883000 |
| H | -3.30101500 | -0.10406800 | -1.90120500 |
| C | -2.75220000 | -2.47518100 | -0.47190200 |
| H | -2.56093000 | -2.58637700 | -1.54349300 |
| H | -2.01067600 | -3.06114400 | 0.07517700  |
| H | -3.74561400 | -2.87670300 | -0.25251900 |
| O | -1.03037100 | 1.88316500  | -0.12662100 |
| O | -1.28684400 | -0.61523400 | -0.32506200 |
| S | -0.65981000 | 0.62214000  | 0.53468700  |
| O | -0.95955900 | 0.42703500  | 1.95178500  |

|   |            |             |             |
|---|------------|-------------|-------------|
| C | 1.05605700 | 0.30326100  | 0.22065500  |
| C | 1.77401800 | -0.47660900 | 1.12602900  |
| C | 1.65564200 | 0.84146000  | -0.91714200 |
| C | 3.11921500 | -0.72679100 | 0.87343100  |
| H | 1.28529500 | -0.86088200 | 2.01382000  |
| C | 3.00137500 | 0.57736400  | -1.15180700 |
| H | 1.07773200 | 1.46472500  | -1.58930600 |
| C | 3.74998800 | -0.21137500 | -0.26725400 |
| H | 3.69158800 | -1.32616500 | 1.57516900  |
| H | 3.48165600 | 0.99552200  | -2.03146400 |
| C | 5.19943900 | -0.51485500 | -0.54755300 |
| H | 5.67879900 | 0.29931500  | -1.09762800 |
| H | 5.75884500 | -0.68132400 | 0.37678000  |
| H | 5.29466400 | -1.42194800 | -1.15648400 |

### Co<sup>III</sup>(salen)-OTs

Charge: 0

Spin Multiplicity: 1

Sum of electronic and thermal Free Energies (a.u.): -2073.832422

Thermal correction to Gibbs Free Energy (a.u.): 0.436437

No imaginary frequency

Calculation of single point energy based on the optimized structure, E = -3312.6846426 a.u.

|   |             |             |             |
|---|-------------|-------------|-------------|
| S | 0.61899800  | -0.29270700 | -1.41761100 |
| O | -0.23773300 | -1.21315000 | -2.18205500 |
| O | 0.58308700  | 1.12651700  | -1.82718400 |
| O | 0.41749400  | -0.45296900 | 0.12924800  |
| C | 2.30860800  | -0.85446900 | -1.49116800 |
| C | 2.63078400  | -1.96136900 | -2.26799400 |
| C | 3.28541600  | -0.15616100 | -0.77558500 |
| C | 3.96248300  | -2.37399700 | -2.33364900 |
| H | 1.84635400  | -2.48250000 | -2.80479200 |
| C | 4.60422500  | -0.58499800 | -0.85029300 |
| H | 3.01395800  | 0.70003300  | -0.16913400 |
| C | 4.96342300  | -1.69829500 | -1.62804200 |
| H | 4.22571700  | -3.23618600 | -2.93997000 |
| H | 5.36959300  | -0.05078000 | -0.29365600 |
| C | 6.39926700  | -2.15677000 | -1.68256200 |
| H | 6.72253000  | -2.55280800 | -0.71274800 |
| H | 6.54005000  | -2.94390900 | -2.42769100 |
| H | 7.07133100  | -1.32877900 | -1.93217600 |
| N | -2.35672700 | -0.00133200 | -0.15152800 |
| N | -0.88156100 | 1.99999100  | 0.54111800  |
| C | -2.88869900 | -1.14495600 | -0.46314900 |
| H | -3.51837000 | -1.19566700 | -1.35136100 |
| C | 0.19069000  | 2.71715600  | 0.62954600  |
| H | 0.23863800  | 3.66266600  | 0.09122400  |
| C | -2.73701300 | -2.35787600 | 0.26776300  |
| C | -3.37680700 | -3.52414200 | -0.21652600 |
| C | -1.99838500 | -2.40896200 | 1.49434100  |
| C | -3.31379000 | -4.71448200 | 0.47544000  |
| H | -3.92217200 | -3.46254800 | -1.15491200 |
| C | -1.96617300 | -3.64352900 | 2.19518000  |
| C | -2.60343600 | -4.76057300 | 1.69449400  |
| H | -3.80230500 | -5.60351700 | 0.09185500  |
| H | -1.41083200 | -3.67188300 | 3.12611500  |
| H | -2.55061200 | -5.69504800 | 2.24634100  |
| C | 1.33600500  | 2.35256400  | 1.40522200  |
| C | 2.52727900  | 3.09881300  | 1.26288700  |
| C | 1.26742800  | 1.28342100  | 2.35885200  |
| C | 3.64613500  | 2.80935600  | 2.01904600  |
| H | 2.55193100  | 3.90123300  | 0.52979100  |
| C | 2.42124400  | 1.03357300  | 3.14631900  |
| C | 3.57684600  | 1.77001000  | 2.97023600  |
| H | 4.56174100  | 3.37641800  | 1.89075400  |
| H | 2.36434500  | 0.22689600  | 3.86869300  |
| H | 4.45105900  | 1.53888200  | 3.57279200  |
| O | -1.38135900 | -1.38545100 | 2.01049400  |
| O | 0.20038200  | 0.56013200  | 2.55217800  |
| C | -2.49332800 | 1.16668500  | -1.04476700 |

|    |             |            |             |
|----|-------------|------------|-------------|
| C  | -3.87254500 | 1.40147400 | -1.66268100 |
| C  | -2.06959300 | 2.39428900 | -0.22619900 |
| C  | -3.81558900 | 2.64589400 | -2.56429400 |
| H  | -4.61493200 | 1.53486000 | -0.86455900 |
| H  | -4.18705500 | 0.53931900 | -2.25823100 |
| C  | -1.94934300 | 3.62035200 | -1.12795700 |
| C  | -3.30164600 | 3.88088300 | -1.81210800 |
| H  | -4.80699500 | 2.84613000 | -2.98403400 |
| H  | -3.14994800 | 2.43594700 | -3.41126400 |
| H  | -1.65698600 | 4.50191900 | -0.54706300 |
| H  | -1.16701900 | 3.43531600 | -1.87354100 |
| H  | -4.03635800 | 4.17194500 | -1.04932900 |
| H  | -3.21099800 | 4.72919000 | -2.49840800 |
| Co | -0.98493400 | 0.20787300 | 1.14986900  |
| H  | -2.86130300 | 2.58008600 | 0.51618000  |
| H  | -1.76001100 | 1.03894600 | -1.84825600 |

### H<sub>2</sub>O-Co<sup>III</sup>-OTs

Charge: 0

Spin Multiplicity: 1

Sum of electronic and thermal Free Energies (a.u.): -2150.274119

Thermal correction to Gibbs Free Energy (a.u.): 0.462327

No imaginary frequency

Calculation of single point energy based on the optimized structure, E = -3389.1814283 a.u.

|   |             |             |             |
|---|-------------|-------------|-------------|
| S | -0.69864000 | 0.31915800  | -1.40001300 |
| O | -0.00579900 | 1.40841100  | -2.11179200 |
| O | -0.48999300 | -1.04020900 | -1.94563500 |
| O | -0.45388500 | 0.36909000  | 0.13708200  |
| C | -2.44964300 | 0.65897600  | -1.40003500 |
| C | -2.93282700 | 1.77149100  | -2.07932900 |
| C | -3.31104300 | -0.21035500 | -0.72582000 |
| C | -4.30719900 | 2.01569400  | -2.08533400 |
| H | -2.23584300 | 2.42832900  | -2.58701600 |
| C | -4.67511700 | 0.05099000  | -0.73929500 |
| H | -2.91879700 | -1.07018600 | -0.19752700 |
| C | -5.19457000 | 1.16591400  | -1.41715100 |
| H | -4.69409200 | 2.88209900  | -2.61470800 |
| H | -5.34946900 | -0.61941200 | -0.21284200 |
| C | -6.67778600 | 1.44066600  | -1.40691400 |
| H | -7.02076000 | 1.71476800  | -0.40228200 |
| H | -6.93757800 | 2.25983100  | -2.08244000 |
| H | -7.24805800 | 0.55641100  | -1.71126100 |
| N | 2.27542700  | 0.35959400  | -0.24189900 |
| N | 1.15010800  | -1.90971000 | 0.30480300  |
| C | 2.46910700  | 1.60098200  | -0.55213500 |
| H | 2.99059000  | 1.82067900  | -1.48437900 |
| C | 0.17407900  | -2.74922500 | 0.28875300  |
| H | 0.24411400  | -3.62689500 | -0.35282700 |
| C | 2.05761600  | 2.73536800  | 0.21535500  |
| C | 2.32793400  | 4.02161600  | -0.30544800 |
| C | 1.41094600  | 2.60357700  | 1.48309000  |
| C | 1.98748000  | 5.16555500  | 0.38741000  |
| H | 2.80818500  | 4.09276500  | -1.27810100 |
| C | 1.08348700  | 3.79213200  | 2.17980000  |
| C | 1.36350100  | 5.03565000  | 1.64302300  |
| H | 2.19333000  | 6.14635800  | -0.02695200 |
| H | 0.59209000  | 3.68711100  | 3.14105200  |
| H | 1.08735200  | 5.92761700  | 2.19897000  |
| C | -1.02125800 | -2.60754000 | 1.07330800  |
| C | -2.11636800 | -3.45357900 | 0.80052400  |
| C | -1.09884700 | -1.65377600 | 2.13671600  |
| C | -3.28857300 | -3.36658200 | 1.53011400  |
| H | -2.02996600 | -4.16609600 | -0.01591000 |
| C | -2.30098900 | -1.59954700 | 2.87981600  |
| C | -3.36690900 | -2.43050900 | 2.57778500  |
| H | -4.13139900 | -4.00941500 | 1.30071300  |
| H | -2.36077500 | -0.86941000 | 3.67943500  |
| H | -4.28239200 | -2.35107200 | 3.15772700  |
| O | 1.13649800  | 1.45312800  | 2.04726300  |



|    |             |             |             |
|----|-------------|-------------|-------------|
| O  | -0.10518100 | -0.86249300 | 2.46902200  |
| C  | 2.60640700  | -0.71567600 | -1.19469400 |
| C  | 4.01471400  | -0.67842200 | -1.79045700 |
| C  | 2.38778200  | -2.04880000 | -0.46253300 |
| C  | 4.17820500  | -1.85014300 | -2.77241800 |
| H  | 4.75361800  | -0.74517000 | -0.98112000 |
| H  | 4.19164900  | 0.26623600  | -2.31372000 |
| C  | 2.47925100  | -3.21270600 | -1.44548900 |
| C  | 3.86426900  | -3.20147900 | -2.11445000 |
| H  | 5.19509000  | -1.85741700 | -3.17888100 |
| H  | 3.49945400  | -1.69547200 | -3.62100100 |
| H  | 2.32569800  | -4.16733500 | -0.92989000 |
| H  | 1.68775400  | -3.10777300 | -2.19730700 |
| H  | 4.62707300  | -3.41955200 | -1.35495500 |
| H  | 3.92322200  | -4.00436200 | -2.85666600 |
| Co | 1.05378900  | -0.19745000 | 1.11457800  |
| H  | 3.18868900  | -2.14562100 | 0.28425700  |
| H  | 1.86910800  | -0.66248200 | -2.00419700 |
| O  | 2.47443400  | -0.69557000 | 2.45759300  |
| H  | 1.83339200  | -1.14597200 | 3.04310800  |
| H  | 2.51542400  | 0.21638900  | 2.81159700  |

### PO-Co<sup>III</sup>-OTs

Charge: 0

Spin Multiplicity: 1

Sum of electronic and thermal Free Energies (a.u.): -2266.919573

Thermal correction to Gibbs Free Energy (a.u.): 0.518947

No imaginary frequency

Calculation of single point energy based on the optimized structure, E = -3505.922625 a.u.

|    |             |             |             |
|----|-------------|-------------|-------------|
| C  | 2.18752000  | 4.92328000  | 1.18601500  |
| C  | 2.69412000  | 4.98430600  | -0.12870000 |
| C  | 1.69149500  | 3.74606300  | 1.70924800  |
| H  | 2.17940800  | 5.82094500  | 1.79882800  |
| C  | 2.69338900  | 3.83517000  | -0.89041700 |
| C  | 1.66864300  | 2.54754600  | 0.94333100  |
| C  | 2.19911100  | 2.60827700  | -0.38589000 |
| H  | 3.07770000  | 3.85356100  | -1.90756200 |
| O  | 1.18807000  | 1.47611800  | 1.49908800  |
| C  | 2.27209900  | 1.46058200  | -1.23269300 |
| Co | 0.94360500  | -0.19172700 | 0.65810800  |
| N  | 1.90585700  | 0.25894300  | -0.92645900 |
| H  | 2.68638700  | 1.63250700  | -2.22654600 |
| N  | 0.77858000  | -1.92331700 | -0.10898200 |
| C  | 1.92955300  | -0.83032900 | -1.91710700 |
| C  | -0.23631400 | -2.69280300 | 0.09051400  |
| C  | 1.79904100  | -2.14671500 | -1.13264800 |
| C  | 3.15212000  | -0.89051100 | -2.83475600 |
| H  | -0.35973400 | -3.57441300 | -0.53731000 |
| C  | -1.23494300 | -2.47042900 | 1.09656100  |
| C  | 1.58837500  | -3.31771500 | -2.08873500 |
| C  | 3.00562000  | -2.07704300 | -3.80121800 |
| H  | 4.06061500  | -0.99585700 | -2.22668600 |
| H  | 3.25269000  | 0.03363500  | -3.41151600 |
| C  | -2.40247900 | -3.26347200 | 1.07712900  |
| C  | -1.05137100 | -1.48664400 | 2.12159900  |
| C  | 2.77734900  | -3.40100000 | -3.05951200 |
| H  | 1.49640100  | -4.25829700 | -1.53373900 |
| H  | 0.65320800  | -3.16189200 | -2.63968600 |
| H  | 3.89358100  | -2.15022300 | -4.43817200 |
| H  | 2.15405100  | -1.88554300 | -4.46651900 |
| C  | -3.39725000 | -3.10086500 | 2.02336500  |
| H  | -2.51623800 | -3.99682700 | 0.28257700  |
| C  | -2.07737700 | -1.35701800 | 3.09056600  |
| O  | 0.01870300  | -0.74334600 | 2.22393000  |
| H  | 3.68267800  | -3.66000500 | -2.49365900 |
| H  | 2.61412000  | -4.21209500 | -3.77689000 |
| C  | -3.21780700 | -2.13849100 | 3.03585300  |
| H  | -3.99282600 | -1.99894400 | 3.78480100  |
| C  | 2.86896800  | -0.33082000 | 2.90630400  |

|   |             |             |             |
|---|-------------|-------------|-------------|
| C | 2.73839200  | -1.75071200 | 2.55836100  |
| O | 2.67659000  | -0.73868300 | 1.50929300  |
| H | 1.97541700  | 0.14686300  | 3.29521600  |
| H | 1.78819900  | -2.24019400 | 2.74104600  |
| H | 3.62206600  | -2.37860400 | 2.47657600  |
| C | 4.17909200  | 0.34774200  | 3.17177200  |
| H | 4.14332900  | 1.37256000  | 2.79072200  |
| H | 4.36492100  | 0.39003100  | 4.25008800  |
| H | 5.00708000  | -0.18105500 | 2.69187900  |
| H | 2.74406300  | -2.29526800 | -0.58940100 |
| H | 1.02702600  | -0.72775100 | -2.52964300 |
| S | -1.25252500 | 0.37942700  | -1.47164500 |
| O | -0.64060500 | 1.41548400  | -2.32213800 |
| O | -1.24881500 | -0.99348200 | -2.02694500 |
| O | -0.71515600 | 0.41448900  | -0.01414400 |
| C | -2.94605400 | 0.83360700  | -1.13894900 |
| C | -3.48570400 | 1.96133800  | -1.74652200 |
| C | -3.70960400 | 0.03544700  | -0.28302900 |
| C | -4.81777800 | 2.29411400  | -1.49383500 |
| H | -2.86316800 | 2.56159800  | -2.40015900 |
| C | -5.03196800 | 0.38427900  | -0.04019800 |
| H | -3.27318700 | -0.83693100 | 0.18714400  |
| C | -5.60656700 | 1.51684500  | -0.63986500 |
| H | -5.24811100 | 3.17346900  | -1.96526800 |
| H | -5.62926500 | -0.23025700 | 0.62843800  |
| C | -7.04059600 | 1.88629900  | -0.35195700 |
| H | -7.16812600 | 2.18622900  | 0.69485600  |
| H | -7.37318600 | 2.71730700  | -0.97944300 |
| H | -7.71250900 | 1.03916500  | -0.52772300 |
| H | 3.07348800  | 5.91719100  | -0.53101900 |
| H | 1.28733200  | 3.69785800  | 2.71488100  |
| H | -1.94193400 | -0.60538600 | 3.86062700  |
| H | -4.29821400 | -3.70357200 | 1.98855200  |

**H<sub>2</sub>O-Co<sup>III</sup>-OTs~PO** one intermediate structure in the formation of H<sub>2</sub>O-Co<sup>III</sup>-OH

Charge: 0

Spin Multiplicity: 1

Sum of electronic and thermal Free Energies (a.u.): -2343.337427

Thermal correction to Gibbs Free Energy (a.u.): 0.542421

No imaginary frequency

Calculation of single point energy based on the optimized structure, E = -3582.3961885 a.u.

|   |             |             |             |
|---|-------------|-------------|-------------|
| S | 0.09122100  | -0.22951500 | 1.73171700  |
| O | -0.47041900 | 0.85280500  | 2.55779600  |
| O | -0.47592900 | -1.57825500 | 1.94263500  |
| O | 0.12739600  | 0.15246500  | 0.22225400  |
| C | 1.85084100  | -0.31784300 | 2.01310800  |
| C | 2.48709200  | 0.67850900  | 2.74452200  |
| C | 2.56753100  | -1.38229200 | 1.46076700  |
| C | 3.86866800  | 0.60159800  | 2.93116400  |
| H | 1.90181200  | 1.49186800  | 3.15814400  |
| C | 3.94091300  | -1.44264500 | 1.65696900  |
| H | 2.05696000  | -2.14525000 | 0.88650700  |
| C | 4.61291100  | -0.45341400 | 2.39299100  |
| H | 4.37462200  | 1.37401400  | 3.50370400  |
| H | 4.50381100  | -2.26530200 | 1.22414400  |
| C | 6.10813100  | -0.52692100 | 2.57596300  |
| H | 6.62620700  | -0.41348700 | 1.61641700  |
| H | 6.46897800  | 0.25796900  | 3.24557300  |
| H | 6.41067400  | -1.49367500 | 2.99253900  |
| N | -2.59285100 | 0.57885800  | 0.18099700  |
| N | -1.74561100 | -1.70612100 | -0.70274700 |
| C | -2.64605800 | 1.74500500  | 0.73922400  |
| H | -3.28610100 | 1.86649100  | 1.61403700  |
| C | -0.94213600 | -2.71138000 | -0.75856000 |
| H | -1.27794600 | -3.67474100 | -0.37567700 |
| C | -1.93989900 | 2.91486300  | 0.31465000  |
| C | -2.10356500 | 4.09951200  | 1.06819500  |
| C | -1.11674400 | 2.92480000  | -0.85347700 |
| C | -1.49442700 | 5.28105400  | 0.69575200  |

|    |             |             |             |
|----|-------------|-------------|-------------|
| H  | -2.72247700 | 4.06034900  | 1.96100200  |
| C  | -0.52464000 | 4.15567100  | -1.22999700 |
| C  | -0.70681700 | 5.29798500  | -0.47091300 |
| H  | -1.62210200 | 6.18060900  | 1.28773800  |
| H  | 0.08315400  | 4.16250700  | -2.12843800 |
| H  | -0.22668500 | 6.22230200  | -0.78063600 |
| C  | 0.39022700  | -2.64706700 | -1.29035900 |
| C  | 1.26189200  | -3.73630900 | -1.07516100 |
| C  | 0.83282200  | -1.51457400 | -2.04277100 |
| C  | 2.56272100  | -3.71348300 | -1.54466000 |
| H  | 0.89692500  | -4.58947500 | -0.50844100 |
| C  | 2.16641300  | -1.51305200 | -2.51441300 |
| C  | 3.00564600  | -2.58615400 | -2.26219600 |
| H  | 3.23091800  | -4.54795400 | -1.36072000 |
| H  | 2.51638600  | -0.62433200 | -3.02924700 |
| H  | 4.03089700  | -2.54873200 | -2.62060800 |
| O  | -0.90487400 | 1.87513200  | -1.60796200 |
| O  | 0.05303400  | -0.49657800 | -2.33453500 |
| C  | -3.26219200 | -0.58363100 | 0.79323400  |
| C  | -4.73580200 | -0.39569700 | 1.15759500  |
| C  | -3.11553000 | -1.75473200 | -0.19100500 |
| C  | -5.26669900 | -1.68924500 | 1.79682600  |
| H  | -5.30534200 | -0.14918300 | 0.25186400  |
| H  | -4.86128700 | 0.43754500  | 1.85585200  |
| C  | -3.57738500 | -3.05526800 | 0.46076200  |
| C  | -5.04652900 | -2.91055500 | 0.89280600  |
| H  | -6.33133800 | -1.58098300 | 2.02932700  |
| H  | -4.74909500 | -1.84856600 | 2.75154700  |
| H  | -3.47934300 | -3.89385400 | -0.23762200 |
| H  | -2.94002400 | -3.26657700 | 1.32793200  |
| H  | -5.67223800 | -2.81341900 | -0.00455100 |
| H  | -5.37295800 | -3.82179400 | 1.40467000  |
| Co | -1.23822900 | 0.08330600  | -1.07218700 |
| H  | -3.76094500 | -1.53747000 | -1.05402000 |
| H  | -2.69411600 | -0.84234400 | 1.69434600  |
| O  | -2.42774300 | 0.12855500  | -2.69775800 |
| H  | -1.75794800 | -0.30665600 | -3.26271300 |
| H  | -2.27102500 | 1.08374500  | -2.84394800 |
| C  | 3.91516300  | 1.90908300  | -1.49866700 |
| C  | 2.45559500  | 1.82664100  | -1.36781600 |
| O  | 3.09415400  | 1.64559300  | -2.64819500 |
| H  | 4.36775900  | 2.90393300  | -1.51100300 |
| H  | 1.86579400  | 2.73533300  | -1.27144600 |
| H  | 1.99437200  | 0.94005400  | -0.94480300 |
| C  | 4.82189600  | 0.79602700  | -1.04253300 |
| H  | 5.67709700  | 0.68718800  | -1.71921900 |
| H  | 5.20275800  | 1.00743600  | -0.03817100 |
| H  | 4.27856800  | -0.15037500 | -1.00614600 |

### Co<sup>III</sup>(salen)-OH

Charge: 0

Spin Multiplicity: 1

Sum of electronic and thermal Free Energies (a.u.): -1254.924656

Thermal correction to Gibbs Free Energy (a.u.): 0.330682

No imaginary frequency

Calculation of single point energy based on the optimized structure, E = -2493.426736 a.u.

|    |            |             |             |
|----|------------|-------------|-------------|
| C  | 4.74225300 | -2.85189200 | -0.17013600 |
| C  | 5.42373100 | -1.61735200 | -0.09779900 |
| C  | 3.36403200 | -2.91101800 | -0.17161500 |
| H  | 5.31355800 | -3.77485300 | -0.22220500 |
| C  | 4.68598600 | -0.45582000 | -0.02937000 |
| H  | 6.50783500 | -1.58716200 | -0.09287000 |
| C  | 2.57472500 | -1.72937400 | -0.10363600 |
| H  | 2.83509300 | -3.85638000 | -0.22558900 |
| C  | 3.26931200 | -0.47752300 | -0.03439300 |
| H  | 5.18624800 | 0.50818500  | 0.03116500  |
| O  | 1.28016300 | -1.85164600 | -0.12091400 |
| C  | 2.57079400 | 0.76309300  | 0.05497600  |
| Co | 0.00182900 | -0.49357800 | -0.05517000 |

|   |             |             |             |
|---|-------------|-------------|-------------|
| N | 1.28304800  | 0.90629000  | 0.02238400  |
| H | 3.19151000  | 1.65273000  | 0.16916300  |
| N | -1.27552500 | 0.88955200  | -0.34116600 |
| C | 0.62638100  | 2.18705800  | 0.31430700  |
| C | -2.55851700 | 0.73345500  | -0.24309100 |
| C | -0.65068400 | 2.20621000  | -0.53904600 |
| C | 1.45299400  | 3.45681600  | 0.111105900 |
| H | -3.19888300 | 1.61447000  | -0.29741600 |
| C | -3.22799900 | -0.51699600 | -0.09354400 |
| C | -1.50792900 | 3.43420000  | -0.23127500 |
| C | 0.59816900  | 4.69742800  | 0.40978700  |
| H | 1.81969700  | 3.49178000  | -0.92377800 |
| H | 2.32996600  | 3.45441200  | 0.76620400  |
| C | -4.63395700 | -0.51661400 | 0.07338800  |
| C | -2.51947500 | -1.75952600 | -0.18632900 |
| C | -0.68520600 | 4.71599500  | -0.42788100 |
| H | -2.38932900 | 3.46248300  | -0.88032200 |
| H | -1.86665500 | 3.37139200  | 0.80431800  |
| H | 1.18470000  | 5.60391700  | 0.22726400  |
| H | 0.33506900  | 4.70209500  | 1.47570800  |
| C | -5.34777500 | -1.69276400 | 0.15680700  |
| H | -5.14645400 | 0.44079200  | 0.13605300  |
| C | -3.28530200 | -2.95537500 | -0.11375200 |
| O | -1.23558200 | -1.85317800 | -0.36597500 |
| H | -0.42435700 | 4.81692700  | -1.48996300 |
| H | -1.29449500 | 5.58884000  | -0.17121300 |
| C | -4.65412800 | -2.91819200 | 0.05682000  |
| H | -6.42383200 | -1.67988000 | 0.29195100  |
| H | -2.74689700 | -3.89373800 | -0.19140900 |
| H | -5.20784900 | -3.85133900 | 0.11733400  |
| O | -0.22806700 | -0.43130300 | 1.73802300  |
| H | -0.03956000 | -1.34411500 | 2.00365300  |
| H | -0.33433200 | 2.25493500  | -1.59274700 |
| H | 0.31037800  | 2.11837100  | 1.36504200  |

### H<sub>2</sub>O-Co<sup>III</sup>-OH

Charge: 0

Spin Multiplicity: 1

Sum of electronic and thermal Free Energies (a.u.): -1331.359753

Thermal correction to Gibbs Free Energy (a.u.): 0.355388

No imaginary frequency

Calculation of single point energy based on the optimized structure, E = -2569.9169091 a.u.

|    |             |             |             |
|----|-------------|-------------|-------------|
| C  | -4.78468700 | -2.76198600 | -0.11713900 |
| C  | -5.42885400 | -1.52013700 | -0.28788400 |
| C  | -3.41231400 | -2.84435000 | 0.01661600  |
| H  | -5.37590700 | -3.67358700 | -0.09379600 |
| C  | -4.65895500 | -0.37600000 | -0.32245700 |
| C  | -2.59447500 | -1.68243300 | -0.00881000 |
| C  | -3.25115400 | -0.42204400 | -0.18463000 |
| H  | -5.13022600 | 0.59458800  | -0.46122100 |
| O  | -1.30636600 | -1.82938600 | 0.14732400  |
| C  | -2.52939000 | 0.81358000  | -0.26449700 |
| Co | 0.00128600  | -0.45032500 | 0.13833300  |
| N  | -1.25392800 | 0.95676500  | -0.13016900 |
| H  | -3.13389700 | 1.69692400  | -0.47606400 |
| N  | 1.31001100  | 0.92468500  | 0.27982200  |
| C  | -0.57159700 | 2.22776400  | -0.40697900 |
| C  | 2.57046500  | 0.75419200  | 0.06286400  |
| C  | 0.68798200  | 2.23530700  | 0.47711500  |
| C  | -1.39313000 | 3.50342700  | -0.21173700 |
| H  | 3.21850100  | 1.63048700  | 0.01563400  |
| C  | 3.21606900  | -0.51500700 | -0.10174400 |
| C  | 1.55584200  | 3.46291400  | 0.20427900  |
| C  | -0.52491300 | 4.74436400  | -0.46677600 |
| H  | -1.78850600 | 3.52338900  | 0.81269300  |
| H  | -2.25152700 | 3.51805600  | -0.89070900 |
| C  | 4.58316400  | -0.53124400 | -0.45651700 |
| C  | 2.52968900  | -1.74400200 | 0.15392200  |
| C  | 0.73500000  | 4.74445200  | 0.40607200  |

|   |             |             |             |
|---|-------------|-------------|-------------|
| H | 2.42723700  | 3.46985800  | 0.86791600  |
| H | 1.93075000  | 3.42025600  | -0.82680700 |
| H | -1.11338000 | 5.65011600  | -0.28643000 |
| H | -0.23176000 | 4.76527100  | -1.52475300 |
| C | 5.28176700  | -1.71634100 | -0.58105400 |
| H | 5.08189900  | 0.41847000  | -0.63725900 |
| C | 3.27333700  | -2.94379700 | 0.03054400  |
| O | 1.27936700  | -1.81223900 | 0.53521100  |
| H | 0.44623500  | 4.82562900  | 1.46251500  |
| H | 1.35324100  | 5.61997400  | 0.18176200  |
| C | 4.60903100  | -2.92705900 | -0.32933700 |
| H | 5.14602700  | -3.86739200 | -0.42180700 |
| O | -0.22751700 | -0.52968500 | 2.23391300  |
| O | 0.28744200  | -0.51482800 | -1.65842300 |
| H | 0.01447900  | -1.41715000 | -1.87917100 |
| H | 0.34843700  | 2.26305600  | 1.52284800  |
| H | -0.23102900 | 2.16008000  | -1.44967300 |
| H | -0.97237200 | -1.15408700 | 2.19837600  |
| H | 0.55229900  | -1.11929600 | 2.25992800  |
| H | 6.32885200  | -1.71556300 | -0.86382900 |
| H | 2.75122400  | -3.87485400 | 0.22408600  |
| H | -2.91186600 | -3.79858600 | 0.14356300  |
| H | -6.50668700 | -1.46751600 | -0.39567400 |

### PO-Co<sup>III</sup>-OH

Charge: 0

Spin Multiplicity: 1

Sum of electronic and thermal Free Energies (a.u.): -1448.006408

Thermal correction to Gibbs Free Energy (a.u.): 0.414285

No imaginary frequency

Calculation of single point energy based on the optimized structure, E = -2686.6581627 a.u.

|    |             |             |             |
|----|-------------|-------------|-------------|
| C  | -4.83987400 | -2.18324000 | -0.69303800 |
| C  | -5.40100500 | -0.91614300 | -0.43584300 |
| C  | -3.47662800 | -2.34453500 | -0.84951500 |
| H  | -5.48961000 | -3.05102400 | -0.77234400 |
| C  | -4.55780100 | 0.17349000  | -0.34979100 |
| C  | -2.57934200 | -1.24386000 | -0.74587000 |
| C  | -3.15705000 | 0.04387900  | -0.48974400 |
| H  | -4.96615200 | 1.16524100  | -0.16666300 |
| O  | -1.30686800 | -1.46998300 | -0.88841300 |
| C  | -2.35650900 | 1.23332500  | -0.42904900 |
| Co | 0.06412300  | -0.26772400 | -0.36778200 |
| N  | -1.06835400 | 1.25824200  | -0.41756000 |
| H  | -2.90274400 | 2.17794700  | -0.40549900 |
| N  | 1.42290000  | 0.93581500  | 0.21911000  |
| C  | -0.27212800 | 2.48318400  | -0.46843700 |
| C  | 2.68765100  | 0.67631300  | 0.17457500  |
| C  | 0.88428200  | 2.26424800  | 0.52775200  |
| C  | -1.00400000 | 3.79679800  | -0.20014900 |
| H  | 3.39486800  | 1.47880600  | 0.38969500  |
| C  | 3.26758100  | -0.59799600 | -0.12268000 |
| C  | 1.86973800  | 3.43269900  | 0.50001300  |
| C  | -0.01385700 | 4.97001500  | -0.22569100 |
| H  | -1.49734100 | 3.74794300  | 0.78036800  |
| H  | -1.78663500 | 3.95602100  | -0.94953000 |
| C  | 4.67801500  | -0.68641700 | -0.18975200 |
| C  | 2.46829800  | -1.77543100 | -0.30115800 |
| C  | 1.13637100  | 4.75565600  | 0.76457700  |
| H  | 2.65620200  | 3.29072800  | 1.24913600  |
| H  | 2.35776800  | 3.46638200  | -0.48270100 |
| H  | -0.53901200 | 5.90468200  | -0.00217100 |
| H  | 0.39505400  | 5.07270400  | -1.23939100 |
| C  | 5.31792400  | -1.88415300 | -0.43269800 |
| H  | 5.25811400  | 0.22303400  | -0.04763400 |
| C  | 3.15726100  | -2.99563100 | -0.54251800 |
| O  | 1.17172400  | -1.79893500 | -0.21261000 |
| H  | 0.73745800  | 4.74920100  | 1.78803600  |
| H  | 1.84562800  | 5.58830800  | 0.71052000  |
| C  | 4.53581100  | -3.04442000 | -0.60647200 |

|   |             |             |             |
|---|-------------|-------------|-------------|
| H | 5.02531300  | -3.99558100 | -0.79922800 |
| C | -0.82389300 | -1.92993100 | 2.00805200  |
| C | 0.31446500  | -1.19876200 | 2.57608400  |
| O | -0.55180400 | -0.54911700 | 1.60824600  |
| H | -0.59297200 | -2.61879100 | 1.20041600  |
| H | 1.31176700  | -1.40700500 | 2.20394500  |
| H | 0.23861400  | -0.76694100 | 3.57139800  |
| C | -2.12245400 | -2.12569700 | 2.73470900  |
| H | -2.95495600 | -2.09050500 | 2.02636700  |
| H | -2.13137100 | -3.10579200 | 3.22350800  |
| H | -2.27026700 | -1.35305900 | 3.49441700  |
| O | 0.58788600  | 0.05862400  | -2.08511000 |
| H | 0.16985500  | -0.66777000 | -2.56928600 |
| H | 0.43419100  | 2.20068200  | 1.53041900  |
| H | 0.17042800  | 2.49754400  | -1.47336500 |
| H | 2.55202600  | -3.88544100 | -0.68038900 |
| H | 6.39993000  | -1.93460700 | -0.48799900 |
| H | -3.04107100 | -3.31758900 | -1.05160400 |
| H | -6.47286000 | -0.80002100 | -0.31817600 |

The basis set for Sb is Lanl2DZ.

**CH<sub>3</sub>CHSbF<sub>6</sub>CH<sub>2</sub>OH**

Charge: 0

Spin Multiplicity: 1

Sum of electronic and thermal Free Energies (a.u.): -798.235181

Thermal correction to Gibbs Free Energy (a.u.): 0.074753

No imaginary frequency

Calculation of single point energy based on the optimized structure, E = -1033.6376489 a.u.

|    |             |             |             |
|----|-------------|-------------|-------------|
| C  | 2.35630200  | 0.56374600  | 0.43197000  |
| C  | 2.69088600  | -0.57840400 | -0.50707800 |
| O  | 2.64432200  | -1.82286200 | 0.14387100  |
| H  | 2.93700600  | 0.49202800  | 1.35186500  |
| H  | 3.72085200  | -0.40663100 | -0.84406600 |
| H  | 2.03838700  | -0.53342200 | -1.38496800 |
| C  | 2.28629100  | 1.94952000  | -0.14519400 |
| H  | 1.95408100  | 2.66589100  | 0.60856900  |
| H  | 3.28766700  | 2.23890600  | -0.47966300 |
| H  | 1.60456200  | 1.97901000  | -0.99556700 |
| H  | 1.71145000  | -2.08458200 | 0.17520900  |
| Sb | -0.88938400 | -0.02118000 | -0.02956600 |
| F  | 0.01897300  | 0.42555800  | -1.58674500 |
| F  | -1.04604700 | 1.77909700  | 0.32071800  |
| F  | 0.97672000  | 0.26152200  | 0.99107700  |
| F  | -1.38910900 | -0.44104300 | 1.68673600  |
| F  | -0.17450000 | -1.73197900 | -0.22152000 |
| F  | -2.50280300 | -0.32618900 | -0.82945000 |

Salen ligand structure is unsimplified and represented by aCo<sup>III</sup>.

**H<sub>2</sub>O-aCo<sup>III</sup>-SbF<sub>6</sub>**

Charge: 0

Spin Multiplicity: 1

Sum of electronic and thermal Free Energies (a.u.): -2488.886482

Thermal correction to Gibbs Free Energy (a.u.): 0.775762

No imaginary frequency

Calculation of single point energy based on the optimized structure, E = -3963.2503729 a.u.

|    |             |             |             |
|----|-------------|-------------|-------------|
| C  | -5.03016300 | 1.66026800  | 0.21289100  |
| C  | -5.61928900 | 0.37380600  | 0.20218000  |
| C  | -3.68970600 | 1.92398800  | -0.02437700 |
| H  | -5.67605100 | 2.49912700  | 0.43646000  |
| C  | -4.77752700 | -0.68458000 | -0.05587400 |
| C  | -2.83160600 | 0.81577600  | -0.33301400 |
| C  | -3.40038800 | -0.49036800 | -0.32686800 |
| H  | -5.14965700 | -1.70342500 | -0.06020500 |
| O  | -1.56557500 | 1.04353400  | -0.61647700 |
| C  | -2.62535400 | -1.66591900 | -0.57261400 |
| Co | -0.25127600 | -0.20609100 | -1.14629300 |
| N  | -1.38005100 | -1.71743000 | -0.91074800 |
| H  | -3.15950600 | -2.60890800 | -0.46037800 |

|    |             |             |             |
|----|-------------|-------------|-------------|
| N  | 1.03534100  | -1.45180500 | -1.76812500 |
| C  | -0.65123800 | -2.98772700 | -1.06099500 |
| C  | 2.30582000  | -1.27352900 | -1.62355300 |
| C  | 0.42162800  | -2.73241300 | -2.13078700 |
| C  | -1.48610300 | -4.22001100 | -1.40570900 |
| H  | 2.97112200  | -2.11512000 | -1.80699100 |
| C  | 2.92303800  | -0.05062900 | -1.21205500 |
| C  | 1.35859500  | -3.93125900 | -2.25709700 |
| C  | -0.56364600 | -5.43828200 | -1.57046200 |
| H  | -2.04892800 | -4.03754300 | -2.33139800 |
| H  | -2.21223300 | -4.42576000 | -0.61333800 |
| C  | 4.27109600  | -0.11624300 | -0.80408000 |
| C  | 2.20402500  | 1.17681300  | -1.19775200 |
| C  | 0.54190000  | -5.18551300 | -2.60241800 |
| H  | 2.11246700  | -3.75015000 | -3.03129500 |
| H  | 1.88145000  | -4.07227200 | -1.30397700 |
| H  | -1.15670900 | -6.31330700 | -1.85577900 |
| H  | -0.10592800 | -5.66885300 | -0.60014400 |
| C  | 4.93606600  | 1.00825800  | -0.36186700 |
| H  | 4.75231500  | -1.08758200 | -0.80345100 |
| C  | 2.90168700  | 2.36065700  | -0.81858200 |
| O  | 0.92592200  | 1.23012100  | -1.55625700 |
| H  | 0.09253500  | -5.06216100 | -3.59708000 |
| H  | 1.20698500  | -6.05292100 | -2.66408100 |
| C  | 4.22420400  | 2.22589100  | -0.41010200 |
| H  | 4.74224900  | 3.11670000  | -0.08058000 |
| H  | -0.13609900 | -3.15808300 | -0.11264900 |
| H  | -0.09429300 | -2.57177600 | -3.08825700 |
| Sb | 1.07737200  | -1.38084800 | 2.10438300  |
| F  | 1.79328500  | -2.54668000 | 0.81815300  |
| F  | -0.53762600 | -2.29849300 | 1.92401200  |
| F  | 0.41865000  | -0.24299000 | 0.62506300  |
| F  | 0.27194200  | -0.12782500 | 3.19446100  |
| F  | 2.62912300  | -0.37724800 | 1.98867600  |
| F  | 1.66729400  | -2.43920600 | 3.49231800  |
| C  | 2.19532300  | 3.72299900  | -0.79934600 |
| C  | 3.14488800  | 4.86674800  | -0.40207200 |
| H  | 2.59317100  | 5.81155100  | -0.42137100 |
| H  | 3.53885800  | 4.73985100  | 0.61121100  |
| H  | 3.98924300  | 4.96081800  | -1.09352700 |
| C  | 1.05239200  | 3.66926200  | 0.23374400  |
| H  | 0.34915300  | 2.87574000  | -0.00695900 |
| H  | 1.44883600  | 3.48334500  | 1.23709700  |
| H  | 0.51273300  | 4.62229600  | 0.25052900  |
| C  | 1.63223600  | 4.05485200  | -2.19932500 |
| H  | 2.43830000  | 4.10189900  | -2.93986400 |
| H  | 0.90846400  | 3.30569500  | -2.51945600 |
| H  | 1.13300800  | 5.02974100  | -2.17952200 |
| C  | 6.34544000  | 0.97409100  | 0.23511100  |
| C  | 6.97428400  | -0.42545400 | 0.14129500  |
| H  | 6.39542600  | -1.16585800 | 0.70194000  |
| H  | 7.05554400  | -0.76314900 | -0.89750200 |
| H  | 7.98319300  | -0.40581100 | 0.56454700  |
| C  | 6.24031500  | 1.36199100  | 1.72749900  |
| H  | 7.22204500  | 1.30489700  | 2.21082100  |
| H  | 5.86438000  | 2.38230100  | 1.84911500  |
| H  | 5.55107200  | 0.69053300  | 2.24832600  |
| C  | 7.26481300  | 1.96994700  | -0.50188500 |
| H  | 6.88867000  | 2.99521400  | -0.44216200 |
| H  | 8.26722400  | 1.95971600  | -0.06048100 |
| H  | 7.35519900  | 1.70703400  | -1.56092100 |
| C  | -3.11845500 | 3.34249900  | 0.11900300  |
| C  | -2.17321400 | 3.34568000  | 1.34280400  |
| H  | -1.69291000 | 4.32352800  | 1.45255900  |
| H  | -2.74325700 | 3.14225200  | 2.25504300  |
| H  | -1.39586900 | 2.58792300  | 1.25217500  |
| C  | -2.37174400 | 3.78008800  | -1.16250000 |
| H  | -1.51907300 | 3.13779800  | -1.37104700 |
| H  | -3.05209000 | 3.76301400  | -2.02264200 |

|   |             |             |             |
|---|-------------|-------------|-------------|
| H | -2.00691400 | 4.80622200  | -1.04733500 |
| C | -4.21906800 | 4.38783000  | 0.37653600  |
| H | -4.94314100 | 4.43311700  | -0.44436300 |
| H | -4.76182200 | 4.19606100  | 1.30742100  |
| H | -3.75785800 | 5.37582600  | 0.46703300  |
| C | -7.11673700 | 0.22294600  | 0.48925100  |
| C | -7.56653700 | -1.24580500 | 0.43501600  |
| H | -7.38937300 | -1.68636500 | -0.55165900 |
| H | -7.04814200 | -1.85468100 | 1.18266500  |
| H | -8.63936400 | -1.31228400 | 0.64006200  |
| C | -7.42790600 | 0.77382900  | 1.89801100  |
| H | -7.16358800 | 1.83146300  | 1.98691900  |
| H | -8.49661300 | 0.67753400  | 2.11883100  |
| H | -6.86836900 | 0.22439400  | 2.66130600  |
| C | -7.92249700 | 1.01687700  | -0.56187500 |
| H | -8.99693000 | 0.92882900  | -0.36706200 |
| H | -7.66775000 | 2.08058200  | -0.54848900 |
| H | -7.72492100 | 0.63802400  | -1.56977800 |
| O | -0.85731500 | 0.16291100  | -2.97651500 |
| H | -0.09508400 | 0.75960400  | -3.14753600 |
| H | -1.58743700 | 0.77100200  | -2.75323400 |

**(salen)aCo<sup>III</sup>(S,S)-OTs**

Charge: 0

Spin Multiplicity: 3

Sum of electronic and thermal Free Energies (a.u.): -2702.579765

No imaginary frequency

|   |             |             |             |
|---|-------------|-------------|-------------|
| S | -0.73545600 | 1.38121100  | 2.28437700  |
| O | 0.02429500  | 1.70384300  | 3.50103700  |
| O | -1.36241800 | 2.51960900  | 1.56897800  |
| O | 0.10580600  | 0.51023300  | 1.33365600  |
| C | -2.05229600 | 0.25584900  | 2.73517100  |
| C | -1.83656600 | -0.66288100 | 3.76250300  |
| C | -3.24242200 | 0.24965100  | 2.01213100  |
| C | -2.82064300 | -1.60386800 | 4.05342600  |
| H | -0.91007000 | -0.62617800 | 4.32449600  |
| C | -4.21701700 | -0.69923100 | 2.31329300  |
| H | -3.39869000 | 0.97717900  | 1.22591200  |
| C | -4.01878100 | -1.64470600 | 3.32616300  |
| H | -2.65604000 | -2.32179200 | 4.85257900  |
| H | -5.14067500 | -0.71210600 | 1.74472800  |
| C | -5.05340400 | -2.70755400 | 3.60026900  |
| H | -4.82531600 | -3.62558200 | 3.04397000  |
| H | -5.08768400 | -2.97191800 | 4.66138800  |
| H | -6.05225200 | -2.38096100 | 3.29682500  |
| N | 1.87092200  | 2.01610500  | -0.25969800 |
| N | -0.51803800 | 2.12171200  | -1.19691600 |
| C | 3.12686000  | 1.80384700  | -0.02210500 |
| H | 3.74217200  | 2.65813400  | 0.25886600  |
| C | -1.78922300 | 2.02618100  | -1.44303700 |
| H | -2.33257500 | 2.93773600  | -1.68546000 |
| C | 3.80510600  | 0.55139400  | -0.11029100 |
| C | 5.19066900  | 0.53116200  | 0.17811800  |
| C | 3.12972100  | -0.63155100 | -0.52772900 |
| C | 5.92906300  | -0.62667000 | 0.06348400  |
| H | 5.65343100  | 1.45910300  | 0.49588200  |
| C | 3.88981600  | -1.83843900 | -0.67703300 |
| C | 5.24009200  | -1.78657500 | -0.37066800 |
| H | 5.81522100  | -2.69829600 | -0.46556300 |
| C | -2.56647700 | 0.83556300  | -1.39769200 |
| C | -3.96821900 | 0.95791600  | -1.56653700 |
| C | -1.96533200 | -0.44061900 | -1.18552500 |
| C | -4.79570400 | -0.14015400 | -1.49295900 |
| H | -4.36942200 | 1.94966400  | -1.74357500 |
| C | -2.82079900 | -1.58625700 | -1.05849600 |
| C | -4.18104100 | -1.39018900 | -1.22095100 |
| H | -4.83043300 | -2.24999700 | -1.12089800 |
| O | 1.84725700  | -0.64771400 | -0.79356000 |
| O | -0.66956500 | -0.59614400 | -1.11975200 |



|    |             |             |             |
|----|-------------|-------------|-------------|
| C  | 1.23640600  | 3.33484400  | -0.10792200 |
| C  | 2.15373400  | 4.55474000  | -0.10644500 |
| C  | 0.19253600  | 3.41506700  | -1.22907300 |
| C  | 1.30308500  | 5.82654200  | 0.03978800  |
| H  | 2.73450000  | 4.58852300  | -1.03869800 |
| H  | 2.86545300  | 4.49858100  | 0.72338500  |
| C  | -0.66988300 | 4.66732500  | -1.07028300 |
| C  | 0.22539200  | 5.91606400  | -1.04648900 |
| H  | 1.94989800  | 6.70941700  | 0.00683100  |
| H  | 0.82369300  | 5.81956700  | 1.02650500  |
| H  | -1.38604700 | 4.75558600  | -1.89402500 |
| H  | -1.23644500 | 4.57642400  | -0.13645500 |
| H  | 0.70665100  | 6.03420200  | -2.02709500 |
| H  | -0.39314600 | 6.80622300  | -0.89243100 |
| Co | 0.57329100  | 0.68192900  | -0.61951600 |
| H  | 0.73237700  | 3.46174500  | -2.18735100 |
| H  | 0.67623700  | 3.30294600  | 0.83344200  |
| C  | 3.21055600  | -3.13682900 | -1.13675600 |
| C  | 4.20903300  | -4.30342500 | -1.23618300 |
| H  | 4.66596200  | -4.53712500 | -0.26882000 |
| H  | 3.67881700  | -5.19904200 | -1.57343200 |
| H  | 5.00815300  | -4.10174400 | -1.95763300 |
| C  | 2.58628700  | -2.93480200 | -2.53671400 |
| H  | 1.84246600  | -2.13882800 | -2.52650700 |
| H  | 3.36098500  | -2.68315900 | -3.26955300 |
| H  | 2.09932000  | -3.86003200 | -2.86326000 |
| C  | 2.11782600  | -3.53580200 | -0.11966800 |
| H  | 2.55760100  | -3.70544800 | 0.86895700  |
| H  | 1.35689000  | -2.76311100 | -0.03249900 |
| H  | 1.63258000  | -4.46446200 | -0.43938400 |
| C  | 7.42656300  | -0.71305600 | 0.37636700  |
| C  | 7.99965600  | 0.64044600  | 0.82580800  |
| H  | 7.89034900  | 1.40384000  | 0.04852900  |
| H  | 7.51221100  | 1.00296200  | 1.73649100  |
| H  | 9.06768200  | 0.53693700  | 1.04022000  |
| C  | 8.18978300  | -1.16832300 | -0.88667500 |
| H  | 9.26260400  | -1.24292400 | -0.67807500 |
| H  | 7.84960200  | -2.14754700 | -1.23555000 |
| H  | 8.04839000  | -0.45420500 | -1.70414700 |
| C  | 7.65294100  | -1.73663400 | 1.51053400  |
| H  | 7.29677500  | -2.73309300 | 1.23398600  |
| H  | 8.72004000  | -1.81661600 | 1.74504200  |
| H  | 7.12347800  | -1.43237800 | 2.41869600  |
| C  | -2.23201800 | -2.95697100 | -0.69838300 |
| C  | -3.32677100 | -4.02904100 | -0.55648000 |
| H  | -4.04402300 | -3.77594000 | 0.23180500  |
| H  | -3.87702400 | -4.18695900 | -1.49057200 |
| H  | -2.86067800 | -4.98057200 | -0.28381300 |
| C  | -1.25625900 | -3.42072100 | -1.80278500 |
| H  | -1.77467600 | -3.50502700 | -2.76458000 |
| H  | -0.42624900 | -2.72530400 | -1.91279300 |
| H  | -0.85092100 | -4.40643700 | -1.54951500 |
| C  | -1.50431800 | -2.85629000 | 0.66297400  |
| H  | -1.03111300 | -3.81589700 | 0.89874900  |
| H  | -0.73773100 | -2.08307900 | 0.66035000  |
| H  | -2.21570500 | -2.62202400 | 1.45824200  |
| C  | -6.31434200 | -0.07187200 | -1.68828300 |
| C  | -6.79083300 | 1.35602900  | -1.99898700 |
| H  | -6.55760500 | 2.04646600  | -1.18204100 |
| H  | -6.33644200 | 1.74192200  | -2.91719000 |
| H  | -7.87625100 | 1.36214200  | -2.13761700 |
| C  | -6.71402400 | -0.98496100 | -2.86829400 |
| H  | -6.43740600 | -2.02728900 | -2.68614600 |
| H  | -7.79712300 | -0.94965700 | -3.02836100 |
| H  | -6.22007700 | -0.66426700 | -3.79081300 |
| C  | -7.02998900 | -0.55042500 | -0.40665600 |
| H  | -8.11562200 | -0.55055500 | -0.55269900 |
| H  | -6.73151200 | -1.56547200 | -0.12863300 |
| H  | -6.80192400 | 0.11227100  | 0.43405700  |

**(salen)aCo<sup>III</sup>(R,S)-OTs**

Charge: 0

Spin Multiplicity: 3

Sum of electronic and thermal Free Energies (a.u.): -2702.578609

No imaginary frequency

|    |             |             |             |
|----|-------------|-------------|-------------|
| S  | 0.28364700  | 0.77604400  | 2.86287000  |
| O  | 1.13467100  | 0.34492600  | 3.97835700  |
| O  | -0.18339500 | 2.18285100  | 2.86568000  |
| O  | 0.94437300  | 0.39462700  | 1.52844900  |
| C  | -1.19276100 | -0.23965800 | 2.88441700  |
| C  | -1.07531700 | -1.60660300 | 3.13596200  |
| C  | -2.43541500 | 0.32426300  | 2.60771700  |
| C  | -2.21031900 | -2.40974500 | 3.07766700  |
| H  | -0.10488900 | -2.02460900 | 3.37959700  |
| C  | -3.56164600 | -0.49296200 | 2.53807400  |
| H  | -2.50454000 | 1.39435900  | 2.45602500  |
| C  | -3.46363700 | -1.87188000 | 2.75312500  |
| H  | -2.12196900 | -3.47572400 | 3.26919900  |
| H  | -4.52645100 | -0.05555000 | 2.29871000  |
| C  | -4.66821900 | -2.76336400 | 2.59214600  |
| H  | -4.81226100 | -3.02324200 | 1.53574000  |
| H  | -4.55611800 | -3.69722000 | 3.15008400  |
| H  | -5.58435800 | -2.26991200 | 2.92997500  |
| N  | 1.74162100  | 2.26164500  | -0.41964500 |
| N  | -0.79833400 | 2.26383100  | -0.20092500 |
| C  | 3.01565700  | 2.08627500  | -0.25007500 |
| H  | 3.63589200  | 2.97745000  | -0.12301200 |
| C  | -2.08646000 | 2.12422900  | -0.29101600 |
| H  | -2.70168200 | 3.00763400  | -0.12555000 |
| C  | 3.68046900  | 0.82939700  | -0.26269800 |
| C  | 5.05911300  | 0.80089000  | 0.05374300  |
| C  | 3.00237100  | -0.34640200 | -0.71214000 |
| C  | 5.79108700  | -0.36070100 | -0.05091600 |
| H  | 5.51821600  | 1.72329200  | 0.39147900  |
| C  | 3.77016500  | -1.54715700 | -0.88222800 |
| C  | 5.10920800  | -1.50715100 | -0.53208200 |
| H  | 5.68318700  | -2.41918600 | -0.62903100 |
| C  | -2.80060400 | 0.93025700  | -0.58411900 |
| C  | -4.21425800 | 1.01331500  | -0.62916100 |
| C  | -2.12990900 | -0.30866300 | -0.80770700 |
| C  | -4.98730500 | -0.09232000 | -0.89795400 |
| H  | -4.66806400 | 1.97893600  | -0.43438600 |
| C  | -2.92432700 | -1.46018600 | -1.14033400 |
| C  | -4.29968100 | -1.30593300 | -1.15749400 |
| H  | -4.90151500 | -2.17436400 | -1.39082400 |
| O  | 1.72686700  | -0.34504700 | -1.01056500 |
| O  | -0.83097400 | -0.42228000 | -0.72308500 |
| C  | 1.15995400  | 3.59577800  | -0.55845200 |
| C  | 0.97563500  | 3.93438500  | -2.04706500 |
| C  | -0.17431600 | 3.55137700  | 0.19649400  |
| C  | 0.18312300  | 5.23238100  | -2.23687200 |
| H  | 0.44214200  | 3.10318300  | -2.52522800 |
| H  | 1.95968700  | 3.99482500  | -2.52462600 |
| C  | -0.99868800 | 4.81878600  | -0.04909500 |
| C  | -1.17907000 | 5.14899000  | -1.53606800 |
| H  | 0.05447400  | 5.43468700  | -3.30527600 |
| H  | 0.75324700  | 6.07570200  | -1.82327900 |
| H  | -1.95754100 | 4.76469500  | 0.47602200  |
| H  | -0.45288400 | 5.63725700  | 0.43652800  |
| H  | -1.78840700 | 4.37787800  | -2.02417300 |
| H  | -1.72281600 | 6.09345400  | -1.64329300 |
| Co | 0.46632500  | 0.86774800  | -0.39073500 |
| H  | 1.81763900  | 4.33845700  | -0.08882600 |
| C  | 3.11199600  | -2.82877700 | -1.40953700 |
| C  | 4.11112100  | -3.99506300 | -1.50538900 |
| H  | 4.52618400  | -4.26144000 | -0.52778600 |
| H  | 3.59250600  | -4.87710500 | -1.89292600 |
| H  | 4.94007800  | -3.77423200 | -2.18640300 |

|   |             |             |             |
|---|-------------|-------------|-------------|
| C | 2.55404600  | -2.57458600 | -2.82854900 |
| H | 1.82531800  | -1.76483200 | -2.82870100 |
| H | 3.36521900  | -2.31591100 | -3.51810200 |
| H | 2.06479500  | -3.47935100 | -3.20519200 |
| C | 1.97738800  | -3.25693000 | -0.45425400 |
| H | 2.37666700  | -3.47307100 | 0.54222400  |
| H | 1.22490400  | -2.47764800 | -0.36087900 |
| H | 1.49526700  | -4.16483800 | -0.83244500 |
| C | 7.27456900  | -0.46569300 | 0.31544100  |
| C | 7.84155100  | 0.87553200  | 0.80729900  |
| H | 7.77081800  | 1.65115700  | 0.03756500  |
| H | 7.32134400  | 1.22913800  | 1.70305800  |
| H | 8.89916300  | 0.75825500  | 1.06227000  |
| C | 8.08126700  | -0.90964300 | -0.92440900 |
| H | 9.14439400  | -0.99703200 | -0.67544400 |
| H | 7.74701800  | -1.88074400 | -1.30067100 |
| H | 7.97818100  | -0.18238700 | -1.73608800 |
| C | 7.44589400  | -1.50827500 | 1.44209300  |
| H | 7.09323800  | -2.49727200 | 1.13577600  |
| H | 8.50206500  | -1.60078800 | 1.71775500  |
| H | 6.88216900  | -1.21319900 | 2.33224500  |
| C | -2.26346400 | -2.81230700 | -1.44396300 |
| C | -3.28984400 | -3.86690900 | -1.89514400 |
| H | -4.02704700 | -4.08673200 | -1.11565300 |
| H | -3.82362600 | -3.56075200 | -2.80129800 |
| H | -2.76565500 | -4.80098200 | -2.11805000 |
| C | -1.23042500 | -2.65535400 | -2.58275600 |
| H | -1.71476700 | -2.28467800 | -3.49320600 |
| H | -0.43457600 | -1.96814600 | -2.30442000 |
| H | -0.78276500 | -3.62840500 | -2.81141600 |
| C | -1.58004500 | -3.34116500 | -0.16570800 |
| H | -1.02980500 | -4.26184900 | -0.38706600 |
| H | -0.88612500 | -2.61227700 | 0.24957000  |
| H | -2.32900700 | -3.56511400 | 0.59788700  |
| C | -6.51835200 | -0.06776200 | -0.94365800 |
| C | -7.08028800 | 1.32741000  | -0.62745800 |
| H | -6.78803900 | 1.66284700  | 0.37297400  |
| H | -6.74213200 | 2.07373800  | -1.35356800 |
| H | -8.17362800 | 1.30309800  | -0.66266800 |
| C | -6.99587600 | -0.47689300 | -2.35421100 |
| H | -6.65645000 | -1.48173100 | -2.62126500 |
| H | -8.09013700 | -0.46983100 | -2.40417200 |
| H | -6.61356000 | 0.21718600  | -3.10926900 |
| C | -7.07970500 | -1.06162600 | 0.09603800  |
| H | -8.17464400 | -1.06758100 | 0.06624800  |
| H | -6.73555400 | -2.08275700 | -0.09007100 |
| H | -6.76674700 | -0.78416600 | 1.10715400  |
| H | 0.03138600  | 3.43523700  | 1.26521300  |

**(salen)Co<sup>III</sup>(S,R)-OTs**

Charge: 0

Spin Multiplicity: 3

Sum of electronic and thermal Free Energies (a.u.): -2702.571131

No imaginary frequency

|   |             |             |            |
|---|-------------|-------------|------------|
| S | -0.76331200 | 1.40755800  | 2.14904200 |
| O | -0.01904500 | 1.84071400  | 3.34107800 |
| O | -1.52920000 | 2.45384800  | 1.43009500 |
| O | 0.15179300  | 0.61341300  | 1.20164100 |
| C | -1.95393000 | 0.17316500  | 2.66435500 |
| C | -1.60971900 | -0.72393300 | 3.67580200 |
| C | -3.18812500 | 0.08662100  | 2.02507700 |
| C | -2.51027600 | -1.72189000 | 4.03775000 |
| H | -0.65224700 | -0.62419800 | 4.17482300 |
| C | -4.07921600 | -0.91781700 | 2.39796300 |
| H | -3.44312100 | 0.79939200  | 1.25088300 |
| C | -3.75304800 | -1.84026400 | 3.39884200 |
| H | -2.24602400 | -2.42240700 | 4.82553500 |
| H | -5.03898700 | -0.99097000 | 1.89696200 |
| C | -4.69930300 | -2.96054000 | 3.75199200 |

|    |             |             |             |
|----|-------------|-------------|-------------|
| H  | -4.46202800 | -3.86591500 | 3.17906800  |
| H  | -4.63539500 | -3.22199800 | 4.81242800  |
| H  | -5.73614800 | -2.69399100 | 3.52757300  |
| N  | 1.89265000  | 2.10220200  | -0.61177700 |
| N  | -0.55718100 | 2.17557300  | -1.29861400 |
| C  | 3.15131400  | 1.89386600  | -0.35214800 |
| H  | 3.77648600  | 2.77829500  | -0.20545200 |
| C  | -1.83308500 | 2.03983300  | -1.50352900 |
| H  | -2.40328200 | 2.93360300  | -1.75156200 |
| C  | 3.81348100  | 0.64129100  | -0.27276200 |
| C  | 5.19724200  | 0.64024200  | 0.03620600  |
| C  | 3.12896100  | -0.57216200 | -0.58551700 |
| C  | 5.92597600  | -0.52641800 | 0.03910200  |
| H  | 5.66168000  | 1.59124000  | 0.27281300  |
| C  | 3.89255800  | -1.78912300 | -0.63838700 |
| C  | 5.23558800  | -1.71576100 | -0.31398700 |
| H  | 5.80914000  | -2.63318500 | -0.33033700 |
| C  | -2.58512800 | 0.83631000  | -1.41726500 |
| C  | -3.99369100 | 0.93262200  | -1.53187100 |
| C  | -1.95157100 | -0.42695300 | -1.23112300 |
| C  | -4.79636400 | -0.18177600 | -1.43016600 |
| H  | -4.42043600 | 1.91724400  | -1.68672300 |
| C  | -2.77794000 | -1.59229200 | -1.08990900 |
| C  | -4.14727800 | -1.42169500 | -1.19703300 |
| H  | -4.77500800 | -2.29544700 | -1.08161200 |
| O  | 1.85155000  | -0.59925900 | -0.84940200 |
| O  | -0.65031300 | -0.54872700 | -1.20596100 |
| C  | 1.41412200  | 3.49376700  | -0.67218000 |
| C  | 1.28662600  | 4.13021900  | 0.71719400  |
| C  | 0.07355100  | 3.50954700  | -1.44008700 |
| C  | 0.94864200  | 5.62791500  | 0.57928700  |
| H  | 2.21888200  | 3.99186900  | 1.27278400  |
| H  | 0.50400500  | 3.61720000  | 1.27475600  |
| C  | -0.82690200 | 4.66644600  | -0.96134500 |
| C  | 0.02291900  | 5.89901100  | -0.62954200 |
| H  | 1.86615900  | 6.21866000  | 0.47654200  |
| H  | 0.46341600  | 5.95820900  | 1.50262900  |
| H  | -1.56460700 | 4.91568100  | -1.73052300 |
| H  | -1.36455600 | 4.33111200  | -0.06881500 |
| H  | 0.61835700  | 6.17270600  | -1.51060000 |
| H  | -0.62870500 | 6.75415700  | -0.42689700 |
| Co | 0.58018700  | 0.76422500  | -0.77133400 |
| H  | 0.30223300  | 3.64018200  | -2.50641200 |
| C  | 3.22541200  | -3.11491200 | -1.02937200 |
| C  | 4.22771500  | -4.28221500 | -1.04579400 |
| H  | 4.66817500  | -4.45996000 | -0.05907500 |
| H  | 3.70449100  | -5.19675100 | -1.34055500 |
| H  | 5.03880000  | -4.11986300 | -1.76381500 |
| C  | 2.62525100  | -2.99340900 | -2.44903000 |
| H  | 1.88504800  | -2.19549800 | -2.49782600 |
| H  | 3.41320900  | -2.78757000 | -3.18199200 |
| H  | 2.13905900  | -3.93393200 | -2.72933300 |
| C  | 2.11769100  | -3.45568500 | -0.00972600 |
| H  | 2.54191100  | -3.57483300 | 0.99297500  |
| H  | 1.36178200  | -2.67507500 | 0.02461400  |
| H  | 1.63123300  | -4.39721400 | -0.28714200 |
| C  | 7.41606500  | -0.59732700 | 0.38730300  |
| C  | 7.99077800  | 0.78429100  | 0.73815600  |
| H  | 7.90593200  | 1.48232300  | -0.10114000 |
| H  | 7.48588400  | 1.22330900  | 1.60456600  |
| H  | 9.05273800  | 0.69124700  | 0.98490800  |
| C  | 8.20036800  | -1.15769800 | -0.81934100 |
| H  | 9.26814700  | -1.22178300 | -0.58338500 |
| H  | 7.86004600  | -2.15985700 | -1.09530500 |
| H  | 8.08095100  | -0.51080500 | -1.69423900 |
| C  | 7.61101200  | -1.52788500 | 1.60444100  |
| H  | 7.25153800  | -2.54085300 | 1.40193000  |
| H  | 8.67260600  | -1.59636400 | 1.86586500  |
| H  | 7.06681600  | -1.14757100 | 2.47440100  |

|   |             |             |             |
|---|-------------|-------------|-------------|
| C | -2.15227200 | -2.95527600 | -0.76559800 |
| C | -3.21813200 | -4.05647700 | -0.62705700 |
| H | -3.92483600 | -3.83983500 | 0.18119500  |
| H | -3.78320400 | -4.20609100 | -1.55365200 |
| H | -2.72361600 | -5.00214100 | -0.38571900 |
| C | -1.18143500 | -3.37703500 | -1.89050600 |
| H | -1.71015400 | -3.45549600 | -2.84720200 |
| H | -0.36865000 | -2.66162300 | -1.99774800 |
| H | -0.75157400 | -4.35802400 | -1.66042500 |
| C | -1.40979400 | -2.85739900 | 0.58709000  |
| H | -0.89692400 | -3.80229000 | 0.79640100  |
| H | -0.67388400 | -2.05482400 | 0.59040400  |
| H | -2.11834100 | -2.66730500 | 1.39548500  |
| C | -6.32343100 | -0.13941800 | -1.55045000 |
| C | -6.83954000 | 1.28180900  | -1.82658800 |
| H | -6.57860100 | 1.97066000  | -1.01677900 |
| H | -6.43769400 | 1.68201800  | -2.76301000 |
| H | -7.93037900 | 1.26933000  | -1.91191800 |
| C | -6.76715700 | -1.05258900 | -2.71433300 |
| H | -6.46225200 | -2.09069000 | -2.55452200 |
| H | -7.85760200 | -1.03675200 | -2.81729400 |
| H | -6.32846500 | -0.71686800 | -3.65919300 |
| C | -6.96255800 | -0.63761000 | -0.23616200 |
| H | -8.05470400 | -0.64373200 | -0.32048200 |
| H | -6.64236800 | -1.65396300 | 0.01124100  |
| H | -6.69010500 | 0.01621700  | 0.59827600  |
| H | 2.14428800  | 4.07332800  | -1.25238500 |

**(salen)aCo<sup>III</sup>(R,R)-OTs**

Charge: 0

Spin Multiplicity: 3

Sum of electronic and thermal Free Energies (a.u.): -2702.570789

No imaginary frequency

|   |             |             |             |
|---|-------------|-------------|-------------|
| S | 0.55844000  | 1.72089200  | 2.17086600  |
| O | 1.04489900  | 1.48548400  | 3.53403100  |
| O | 0.95943500  | 2.99907000  | 1.52861500  |
| O | 0.85179100  | 0.50742900  | 1.27880800  |
| C | -1.23864600 | 1.73492800  | 2.20117200  |
| C | -1.92625700 | 0.52844500  | 2.35140900  |
| C | -1.93652800 | 2.93111800  | 2.05790600  |
| C | -3.31613700 | 0.52341900  | 2.32967900  |
| H | -1.37022800 | -0.39551500 | 2.45090400  |
| C | -3.33247100 | 2.91259700  | 2.03299700  |
| H | -1.38402300 | 3.85920200  | 1.96064800  |
| C | -4.04066700 | 1.71260300  | 2.16302900  |
| H | -3.84841800 | -0.42005800 | 2.41362700  |
| H | -3.87942700 | 3.84494800  | 1.91688600  |
| C | -5.54581900 | 1.68491800  | 2.09255300  |
| H | -5.87743700 | 1.25036400  | 1.14308600  |
| H | -5.97209600 | 1.07088500  | 2.89256300  |
| H | -5.97240500 | 2.68852500  | 2.17117300  |
| N | 1.55411700  | 1.69428000  | -1.20070400 |
| N | -0.99792500 | 1.54244100  | -1.06023100 |
| C | 2.83385000  | 1.64773300  | -1.00224600 |
| H | 3.41119900  | 2.55534000  | -1.17340400 |
| C | -2.27089000 | 1.27456500  | -1.13226200 |
| H | -2.94633200 | 2.10003300  | -1.35020400 |
| C | 3.57615700  | 0.49556900  | -0.61314100 |
| C | 4.95345400  | 0.66152100  | -0.34017400 |
| C | 2.97979100  | -0.80034500 | -0.61593900 |
| C | 5.76105600  | -0.41824200 | -0.05592600 |
| H | 5.35163400  | 1.66990300  | -0.35144500 |
| C | 3.81754800  | -1.93641900 | -0.36287200 |
| C | 5.15381600  | -1.69796700 | -0.08520500 |
| H | 5.78377100  | -2.55014000 | 0.13297100  |
| C | -2.88807900 | 0.01452300  | -0.92114800 |
| C | -4.29887400 | -0.05548800 | -1.04396200 |
| C | -2.12672500 | -1.12861100 | -0.53627700 |
| C | -4.98285400 | -1.21922200 | -0.77914000 |

|    |             |             |             |
|----|-------------|-------------|-------------|
| H  | -4.82239500 | 0.84487800  | -1.34664300 |
| C  | -2.83440100 | -2.33965400 | -0.21859700 |
| C  | -4.21108200 | -2.33266700 | -0.35377200 |
| H  | -4.74549600 | -3.24347500 | -0.11793200 |
| O  | 1.70676300  | -0.97579200 | -0.87915600 |
| O  | -0.82545000 | -1.10503600 | -0.44930900 |
| C  | 0.89484800  | 2.89934200  | -1.72743700 |
| C  | 1.60262700  | 4.23175700  | -1.41841100 |
| C  | -0.51909400 | 2.93067300  | -1.15291900 |
| C  | 0.59645500  | 5.40830900  | -1.43643200 |
| H  | 2.40066100  | 4.40647600  | -2.14785000 |
| H  | 2.04908000  | 4.15863800  | -0.42376800 |
| C  | -1.39932900 | 3.90932100  | -1.94261000 |
| C  | -0.57326000 | 5.14070800  | -2.39163200 |
| H  | 1.11294900  | 6.33190600  | -1.71433000 |
| H  | 0.20791600  | 5.56289600  | -0.42361400 |
| H  | -1.82466100 | 3.40805300  | -2.82039800 |
| H  | -2.23687600 | 4.22905700  | -1.31362400 |
| H  | -0.17889500 | 4.97062400  | -3.40084100 |
| H  | -1.22390100 | 6.01770300  | -2.46061400 |
| Co | 0.37878500  | 0.29446900  | -0.70226900 |
| C  | 3.23267400  | -3.35490500 | -0.35086300 |
| C  | 4.30553400  | -4.42100500 | -0.06766300 |
| H  | 4.76589400  | -4.28971100 | 0.91699000  |
| H  | 3.83707600  | -5.40971800 | -0.08078600 |
| H  | 5.09741900  | -4.42040000 | -0.82444400 |
| C  | 2.60654900  | -3.67936100 | -1.72626900 |
| H  | 1.81969500  | -2.97063900 | -1.98158900 |
| H  | 3.37099000  | -3.65062700 | -2.51069300 |
| H  | 2.17542400  | -4.68619200 | -1.71102200 |
| C  | 2.16832700  | -3.44780000 | 0.76415000  |
| H  | 2.62137300  | -3.25666400 | 1.74229200  |
| H  | 1.37224300  | -2.72342100 | 0.60911400  |
| H  | 1.72943500  | -4.45124600 | 0.78105600  |
| C  | 7.24998200  | -0.29797200 | 0.28305500  |
| C  | 7.72913500  | 1.16226300  | 0.25870300  |
| H  | 7.60163400  | 1.61320700  | -0.73097100 |
| H  | 7.19226200  | 1.77533800  | 0.98939800  |
| H  | 8.79385100  | 1.20570600  | 0.50739500  |
| C  | 8.07824300  | -1.09894100 | -0.74521700 |
| H  | 9.14609900  | -1.02901200 | -0.51128500 |
| H  | 7.80714400  | -2.15857100 | -0.74848400 |
| H  | 7.92297200  | -0.71032300 | -1.75675700 |
| C  | 7.49616100  | -0.86644100 | 1.69795100  |
| H  | 7.20947400  | -1.91971000 | 1.76683000  |
| H  | 8.55741100  | -0.79117500 | 1.95909500  |
| H  | 6.91785000  | -0.31307800 | 2.44398600  |
| C  | -2.07623300 | -3.57772100 | 0.27794800  |
| C  | -3.02285100 | -4.75554300 | 0.56903300  |
| H  | -3.75308600 | -4.51485200 | 1.34896200  |
| H  | -3.56488100 | -5.07890500 | -0.32607300 |
| H  | -2.43395600 | -5.60695100 | 0.92272800  |
| C  | -1.06970600 | -4.04194500 | -0.79850700 |
| H  | -1.59675600 | -4.31336600 | -1.71990800 |
| H  | -0.34502100 | -3.26325900 | -1.02641200 |
| H  | -0.52810300 | -4.92622100 | -0.44642600 |
| C  | -1.34553900 | -3.23061000 | 1.59585700  |
| H  | -0.78322600 | -4.09921600 | 1.95382500  |
| H  | -0.64829000 | -2.40443100 | 1.46352300  |
| H  | -2.07075800 | -2.95754700 | 2.37058900  |
| C  | -6.50160800 | -1.36855100 | -0.91708300 |
| C  | -7.16686700 | -0.07540000 | -1.41514000 |
| H  | -7.01829500 | 0.75625600  | -0.71913100 |
| H  | -6.78092500 | 0.22418500  | -2.39478200 |
| H  | -8.24540600 | -0.22990000 | -1.51562600 |
| C  | -6.81141500 | -2.48933900 | -1.93412700 |
| H  | -6.39490500 | -3.45013000 | -1.61892700 |
| H  | -7.89390900 | -2.61522600 | -2.04469900 |
| H  | -6.39191600 | -2.24872500 | -2.91600300 |

|   |             |             |             |
|---|-------------|-------------|-------------|
| C | -7.11190600 | -1.73854000 | 0.45258400  |
| H | -8.19690400 | -1.86172100 | 0.36629500  |
| H | -6.70056100 | -2.67545900 | 0.83890900  |
| H | -6.91467000 | -0.95681600 | 1.19210200  |
| H | -0.41676300 | 3.27071100  | -0.11921500 |
| H | 0.81657500  | 2.75659300  | -2.81535300 |

**PO(R)-aCo<sup>III</sup>(S,S)-OTs**

Charge: 0

Spin Multiplicity: 1

Sum of electronic and thermal Free Energies (a.u.): -2895.653423

No imaginary frequency

|    |             |             |             |
|----|-------------|-------------|-------------|
| C  | 4.94989400  | -1.90070800 | 0.06007300  |
| C  | 5.67475700  | -0.73505600 | 0.39198400  |
| C  | 3.57572800  | -1.94843900 | -0.14100200 |
| H  | 5.50040300  | -2.82542000 | -0.03047900 |
| C  | 4.93497400  | 0.41902700  | 0.55991300  |
| C  | 2.83161600  | -0.72122000 | -0.06215700 |
| C  | 3.53990100  | 0.45328300  | 0.34637800  |
| H  | 5.42063300  | 1.34358300  | 0.86256900  |
| O  | 1.56068900  | -0.72002200 | -0.35434400 |
| C  | 2.87635400  | 1.69522900  | 0.60636200  |
| Co | 0.44776600  | 0.80227000  | -0.54584100 |
| N  | 1.63560800  | 1.96434000  | 0.37975800  |
| H  | 3.49910200  | 2.47591000  | 1.04353900  |
| N  | -0.62587900 | 2.34973400  | -0.79871000 |
| C  | 1.02140400  | 3.25922800  | 0.69290900  |
| C  | -1.90080200 | 2.30406100  | -0.98869800 |
| C  | 0.10502400  | 3.58619200  | -0.50105300 |
| C  | 1.96497600  | 4.42178800  | 0.99292900  |
| H  | -2.46516700 | 3.23436700  | -0.94866400 |
| C  | -2.66505800 | 1.11416700  | -1.21778300 |
| C  | -0.73446600 | 4.82849900  | -0.21009300 |
| C  | 1.14259500  | 5.68966400  | 1.27052200  |
| H  | 2.63958300  | 4.58547000  | 0.14090600  |
| H  | 2.58544300  | 4.19202100  | 1.86510300  |
| C  | -4.07106400 | 1.23603900  | -1.15365800 |
| C  | -2.04054300 | -0.14406000 | -1.46695000 |
| C  | 0.18763800  | 6.01345400  | 0.11520900  |
| H  | -1.36544000 | 5.07884000  | -1.07036000 |
| H  | -1.39376100 | 4.61241100  | 0.63875700  |
| H  | 1.81470600  | 6.53437600  | 1.45513400  |
| H  | 0.56121800  | 5.54003900  | 2.18895100  |
| C  | -4.89619300 | 0.13928300  | -1.29836000 |
| H  | -4.48150900 | 2.22003500  | -0.95506000 |
| C  | -2.88901000 | -1.29171400 | -1.60667700 |
| O  | -0.73794100 | -0.25809000 | -1.59169300 |
| H  | 0.77266600  | 6.27150600  | -0.77837300 |
| H  | -0.41605000 | 6.89391500  | 0.35897300  |
| C  | -4.26177600 | -1.10446200 | -1.52359300 |
| H  | -4.89675900 | -1.97591900 | -1.61741900 |
| C  | 1.82490200  | 0.18182200  | -3.12499900 |
| C  | 0.87723200  | 1.22715600  | -3.52797600 |
| O  | 1.47981900  | 1.26935800  | -2.20103800 |
| H  | 1.38581100  | -0.75482400 | -2.80257200 |
| H  | -0.18213200 | 0.99592600  | -3.51192800 |
| H  | 1.20589300  | 2.04967300  | -4.15799100 |
| C  | 3.26781100  | 0.14897400  | -3.53024700 |
| H  | 3.87261800  | -0.24454300 | -2.70829500 |
| H  | 3.39285600  | -0.51240000 | -4.39390200 |
| H  | 3.63000500  | 1.14637300  | -3.79393600 |
| H  | 0.75693100  | 3.78233500  | -1.36575800 |
| H  | 0.37662900  | 3.10337000  | 1.56298800  |
| S  | -0.99057300 | 0.93239600  | 2.23415800  |
| O  | 0.09940100  | 1.11372100  | 3.20712000  |
| O  | -1.78249900 | 2.14192700  | 1.91680700  |
| O  | -0.51669000 | 0.19588400  | 0.95333000  |
| C  | -2.10680500 | -0.32894100 | 2.82763300  |
| C  | -1.82363500 | -0.99964200 | 4.01159300  |

|   |             |             |             |
|---|-------------|-------------|-------------|
| C | -3.22431700 | -0.65894200 | 2.05621100  |
| C | -2.67853200 | -2.01997000 | 4.43258200  |
| H | -0.94125400 | -0.72603200 | 4.57895100  |
| C | -4.05894600 | -1.68336100 | 2.48578000  |
| H | -3.42711600 | -0.13242700 | 1.13213600  |
| C | -3.80062600 | -2.37840500 | 3.67859800  |
| H | -2.46387300 | -2.55094100 | 5.35598500  |
| H | -4.92095700 | -1.95443200 | 1.88300000  |
| C | -4.72706500 | -3.47798400 | 4.13460300  |
| H | -4.95956300 | -4.16628100 | 3.31529400  |
| H | -4.28851400 | -4.05785100 | 4.95095800  |
| H | -5.67971000 | -3.06854400 | 4.49174300  |
| C | -2.28150300 | -2.69117500 | -1.76824900 |
| C | -3.35770200 | -3.78677400 | -1.86460600 |
| H | -4.01572500 | -3.64753200 | -2.72942400 |
| H | -2.86798600 | -4.75919000 | -1.97523300 |
| H | -3.97580100 | -3.83202500 | -0.96185400 |
| C | -1.41210700 | -2.99586700 | -0.52821600 |
| H | -0.62877000 | -2.25256900 | -0.40016500 |
| H | -2.02882700 | -2.99639700 | 0.37618800  |
| H | -0.94903200 | -3.98348000 | -0.62896100 |
| C | -1.43583400 | -2.75812600 | -3.05922500 |
| H | -2.06714700 | -2.59354100 | -3.93991400 |
| H | -0.65059400 | -2.00385700 | -3.04979800 |
| H | -0.97067600 | -3.74536800 | -3.15473900 |
| C | -6.42372000 | 0.20650900  | -1.19802800 |
| C | -6.92146400 | 1.64135800  | -0.96128800 |
| H | -6.53406900 | 2.05309300  | -0.02398300 |
| H | -6.62843400 | 2.30918200  | -1.77795000 |
| H | -8.01421900 | 1.64962200  | -0.90106900 |
| C | -6.89739200 | -0.66903300 | -0.01705700 |
| H | -7.98934700 | -0.64159600 | 0.06924400  |
| H | -6.60009700 | -1.71415100 | -0.14641100 |
| H | -6.46990300 | -0.31082500 | 0.92459300  |
| C | -7.05149900 | -0.31595000 | -2.50819200 |
| H | -6.75918700 | -1.34986900 | -2.71296200 |
| H | -8.14510300 | -0.28326100 | -2.44944100 |
| H | -6.73564500 | 0.29538000  | -3.35955000 |
| C | 7.19675900  | -0.72615300 | 0.59271100  |
| C | 7.52565000  | -0.27388900 | 2.03181800  |
| H | 7.14271200  | 0.73023900  | 2.23623200  |
| H | 7.07993700  | -0.95535700 | 2.76299000  |
| H | 8.60953400  | -0.25748800 | 2.19288400  |
| C | 7.82231600  | -2.11329500 | 0.37080300  |
| H | 7.64045800  | -2.48278300 | -0.64356800 |
| H | 8.90593500  | -2.05601700 | 0.51408500  |
| H | 7.43322200  | -2.85178000 | 1.07886000  |
| C | 7.83759900  | 0.25714200  | -0.41068900 |
| H | 8.92559100  | 0.28692100  | -0.28250500 |
| H | 7.62247200  | -0.04541300 | -1.44070800 |
| H | 7.45640500  | 1.27364900  | -0.27501900 |
| C | 2.85173700  | -3.28339900 | -0.37714500 |
| C | 1.87383300  | -3.51763300 | 0.79831300  |
| H | 1.17077600  | -2.69123800 | 0.89941600  |
| H | 1.30491900  | -4.44061600 | 0.64030900  |
| H | 2.43001900  | -3.61748100 | 1.73636700  |
| C | 2.08051800  | -3.27307500 | -1.71500200 |
| H | 1.28696300  | -2.53087700 | -1.69951800 |
| H | 2.75901900  | -3.06017600 | -2.54976800 |
| H | 1.62737400  | -4.25423000 | -1.89439200 |
| C | 3.82722000  | -4.47323700 | -0.41980000 |
| H | 4.54342300  | -4.38953800 | -1.24472900 |
| H | 4.38758900  | -4.58039300 | 0.51442400  |
| H | 3.25837500  | -5.39614000 | -0.56888100 |

**PO(S)-aCo<sup>III</sup>(S,S)-OTs**

Charge: 0

Spin Multiplicity: 1

Sum of electronic and thermal Free Energies (a.u.): -2895.652709



No imaginary frequency

|    |             |             |             |
|----|-------------|-------------|-------------|
| Co | 0.46376600  | 0.87224800  | -0.49814700 |
| N  | 1.67726400  | 1.91161400  | 0.53212100  |
| N  | -0.64950300 | 2.41234000  | -0.45956100 |
| C  | -1.93308300 | 2.36341500  | -0.57299800 |
| H  | -2.50782000 | 3.26391800  | -0.36196500 |
| C  | 2.91642400  | 1.60356200  | 0.72416500  |
| H  | 3.54071800  | 2.31434800  | 1.26573900  |
| C  | -2.69180600 | 1.20244700  | -0.93165000 |
| C  | -2.06592800 | 0.01329500  | -1.41185600 |
| C  | -4.09296400 | 1.27998400  | -0.76678900 |
| C  | -2.90899900 | -1.11092700 | -1.70062000 |
| C  | -4.91105200 | 0.20275600  | -1.03911600 |
| H  | -4.50317900 | 2.20980800  | -0.38818900 |
| C  | -4.27614700 | -0.97093600 | -1.50777000 |
| H  | -4.90508200 | -1.82769700 | -1.71249800 |
| C  | 3.57408300  | 0.40423800  | 0.30973300  |
| C  | 2.86908200  | -0.68660100 | -0.28524300 |
| C  | 4.96441500  | 0.31868900  | 0.56948100  |
| C  | 3.60191700  | -1.90572900 | -0.51467400 |
| C  | 5.68990100  | -0.81230700 | 0.27066400  |
| H  | 5.44252500  | 1.18342900  | 1.01790600  |
| C  | 4.96201700  | -1.90800200 | -0.25546800 |
| H  | 5.51221100  | -2.81934100 | -0.45138600 |
| O  | -0.77057000 | -0.05683200 | -1.61571300 |
| O  | 1.60941600  | -0.62821800 | -0.61592000 |
| O  | 1.36392900  | 1.63748900  | -2.12698500 |
| C  | 0.64304600  | 1.74909200  | -3.39885600 |
| C  | 1.70776400  | 0.75329600  | -3.23419700 |
| H  | -0.37037600 | 1.37063900  | -3.30814100 |
| H  | 1.44621900  | -0.28163100 | -3.05229900 |
| C  | 0.08364100  | 3.61122200  | -0.04177100 |
| C  | 1.06994700  | 3.14625400  | 1.04420500  |
| H  | 0.68264700  | 3.92926300  | -0.90826800 |
| H  | 0.47731300  | 2.87037000  | 1.92217200  |
| C  | 2.02043800  | 4.27624800  | 1.43590100  |
| H  | 2.69141400  | 3.95020200  | 2.23679700  |
| H  | 2.64432300  | 4.55333100  | 0.57472400  |
| C  | -0.74914100 | 4.79128700  | 0.45364000  |
| H  | -1.43392100 | 5.13715000  | -0.32903500 |
| H  | -1.35404300 | 4.46000000  | 1.30593700  |
| C  | 1.20685000  | 5.48755700  | 1.91762700  |
| C  | 0.18125000  | 5.94025200  | 0.87141100  |
| H  | -0.41308900 | 6.77378000  | 1.26012900  |
| H  | 0.70896900  | 6.31755800  | -0.01545400 |
| H  | 1.88277000  | 6.31224100  | 2.16746200  |
| H  | 0.68281500  | 5.21584400  | 2.84260900  |
| H  | 2.70216200  | 0.94867400  | -3.62634800 |
| C  | 0.84234400  | 3.05616200  | -4.10820200 |
| H  | 0.51648000  | 2.96661500  | -5.14971300 |
| H  | 0.24498400  | 3.84158300  | -3.63469300 |
| H  | 1.89332200  | 3.35693600  | -4.09423100 |
| C  | -2.29722800 | -2.44850000 | -2.13635200 |
| C  | -3.36638200 | -3.52745900 | -2.38177500 |
| H  | -2.87350800 | -4.45460600 | -2.69013500 |
| H  | -3.94040100 | -3.74788800 | -1.47573000 |
| H  | -4.06633700 | -3.24448000 | -3.17570200 |
| C  | -1.36975400 | -2.95115800 | -1.00901500 |
| H  | -0.59007500 | -2.22605900 | -0.78812100 |
| H  | -1.94319100 | -3.12215600 | -0.09225100 |
| H  | -0.90025300 | -3.89631800 | -1.30227900 |
| C  | -1.50686500 | -2.27249000 | -3.45211300 |
| H  | -2.17437200 | -1.95471200 | -4.26133500 |
| H  | -0.72041100 | -1.52822800 | -3.33714800 |
| H  | -1.04769700 | -3.22309700 | -3.74492200 |
| C  | -6.42939100 | 0.21550200  | -0.83395300 |
| C  | -6.93037800 | 1.58031500  | -0.33513700 |
| H  | -6.48719200 | 1.84429400  | 0.63026400  |
| H  | -6.70175000 | 2.37863500  | -1.04875900 |

|   |             |             |             |
|---|-------------|-------------|-------------|
| H | -8.01670800 | 1.55172200  | -0.20521900 |
| C | -6.81047500 | -0.85136600 | 0.21604100  |
| H | -7.89450600 | -0.86581600 | 0.37504700  |
| H | -6.50707900 | -1.85383600 | -0.10088200 |
| H | -6.32597100 | -0.63969700 | 1.17428300  |
| C | -7.13559100 | -0.10333300 | -2.16929100 |
| H | -6.84367000 | -1.08316100 | -2.55795700 |
| H | -8.22320200 | -0.10711300 | -2.03679500 |
| H | -6.88542000 | 0.64508500  | -2.92798000 |
| C | 2.86905400  | -3.18404700 | -0.94999300 |
| C | 1.88720200  | -3.57493000 | 0.17971900  |
| H | 2.44259700  | -3.81832900 | 1.09157500  |
| H | 1.19659800  | -2.76227500 | 0.40363100  |
| H | 1.30456400  | -4.45643800 | -0.10962100 |
| C | 2.10522800  | -2.97579600 | -2.27640900 |
| H | 1.64968400  | -3.91899500 | -2.59753300 |
| H | 1.31527300  | -2.23832300 | -2.16032600 |
| H | 2.79086900  | -2.64883700 | -3.06736300 |
| C | 3.83564100  | -4.36329900 | -1.16069400 |
| H | 4.56366900  | -4.16115500 | -1.95416400 |
| H | 4.38218300  | -4.61714800 | -0.24686700 |
| H | 3.26198000  | -5.24754600 | -1.45491900 |
| C | 7.19755600  | -0.94776700 | 0.50732800  |
| C | 7.80674100  | 0.33975700  | 1.08501900  |
| H | 7.66244500  | 1.19115500  | 0.41179900  |
| H | 7.36967600  | 0.59201400  | 2.05650400  |
| H | 8.88368800  | 0.20868200  | 1.22993800  |
| C | 7.46410200  | -2.09779900 | 1.50308000  |
| H | 7.08584700  | -3.05320400 | 1.12826300  |
| H | 8.53950200  | -2.21110800 | 1.68071900  |
| H | 6.97610800  | -1.89905000 | 2.46231900  |
| C | 7.90063900  | -1.25770500 | -0.83214100 |
| H | 8.98036200  | -1.37114500 | -0.68324200 |
| H | 7.52624100  | -2.18305300 | -1.27950600 |
| H | 7.73684000  | -0.44876200 | -1.55144400 |
| S | -0.78867500 | 0.55513100  | 2.35028600  |
| O | 0.35973100  | 0.61146200  | 3.26957200  |
| O | -1.61120000 | 1.78270700  | 2.26546800  |
| O | -0.39222300 | 0.02420900  | 0.94668200  |
| C | -1.85167000 | -0.80185000 | 2.81803400  |
| C | -1.50591800 | -1.60974700 | 3.89473800  |
| C | -2.99656500 | -1.05685900 | 2.05803800  |
| C | -2.32462100 | -2.69352100 | 4.21830300  |
| H | -0.60402300 | -1.39064800 | 4.45504800  |
| C | -3.79457700 | -2.14499500 | 2.38886200  |
| H | -3.24836700 | -0.42335400 | 1.21697000  |
| C | -3.47283300 | -2.97859700 | 3.47262100  |
| H | -2.06077200 | -3.33151400 | 5.05736400  |
| H | -4.67772500 | -2.35686500 | 1.79286300  |
| C | -4.35983200 | -4.14722300 | 3.82312300  |
| H | -4.59947400 | -4.74342200 | 2.93634900  |
| H | -3.88449800 | -4.80484700 | 4.55563000  |
| H | -5.31125400 | -3.80677700 | 4.24914100  |

**(salen)aCo<sup>III</sup>-Cl**

Charge: 0

Spin Multiplicity: 1

Sum of electronic and thermal Free Energies (a.u.): -2268.072187

No imaginary frequency

|   |            |             |             |
|---|------------|-------------|-------------|
| C | 4.74077300 | -1.62706400 | -0.02318700 |
| C | 5.44460400 | -0.39541800 | -0.06469300 |
| C | 3.36320700 | -1.75345400 | -0.01332200 |
| H | 5.33138800 | -2.53302000 | 0.01816500  |
| C | 4.68527200 | 0.75214600  | -0.07589200 |
| C | 2.57748100 | -0.54928300 | -0.08286500 |
| C | 3.26877700 | 0.70203200  | -0.08010400 |
| H | 5.15354700 | 1.73085000  | -0.07842600 |
| O | 1.28012700 | -0.63337400 | -0.16618400 |
| C | 2.57029800 | 1.94175200  | -0.04767900 |

|    |             |             |             |
|----|-------------|-------------|-------------|
| Co | -0.00418900 | 0.71292900  | -0.08004900 |
| N  | 1.28125700  | 2.09819000  | -0.05004000 |
| H  | 3.19465700  | 2.83418600  | -0.00165600 |
| N  | -1.26594300 | 2.08881600  | -0.40666100 |
| C  | 0.64981600  | 3.40718800  | 0.17687000  |
| C  | -2.55338900 | 1.93834800  | -0.33880100 |
| C  | -0.63729600 | 3.39686300  | -0.65607900 |
| C  | 1.48798300  | 4.65126400  | -0.11480200 |
| H  | -3.18298600 | 2.82417400  | -0.42203000 |
| C  | -3.24106100 | 0.69969000  | -0.19426400 |
| C  | -1.48318300 | 4.64074700  | -0.38317600 |
| C  | 0.65209600  | 5.91420600  | 0.14415000  |
| H  | 1.82770700  | 4.62922300  | -1.15907000 |
| H  | 2.38076400  | 4.67216100  | 0.51804000  |
| C  | -4.64707200 | 0.74457500  | -0.03261900 |
| C  | -2.55097000 | -0.54741600 | -0.30330700 |
| C  | -0.65513100 | 5.90570600  | -0.65648600 |
| H  | -2.37736200 | 4.64871300  | -1.01471300 |
| H  | -1.81992000 | 4.62514500  | 0.66141100  |
| H  | 1.24113900  | 6.80421900  | -0.10029000 |
| H  | 0.42047100  | 5.97460500  | 1.21556800  |
| C  | -5.39888600 | -0.40730000 | 0.02573400  |
| H  | -5.11411200 | 1.72059400  | 0.04626300  |
| C  | -3.33281500 | -1.75446300 | -0.28377600 |
| O  | -1.25788600 | -0.61269100 | -0.46352800 |
| H  | -0.42426100 | 5.95803500  | -1.72894400 |
| H  | -1.25029700 | 6.79405500  | -0.42119500 |
| C  | -4.70093000 | -1.63445300 | -0.11313600 |
| H  | -5.28765000 | -2.54330200 | -0.08166600 |
| C  | -2.65733800 | -3.12267500 | -0.44651400 |
| C  | -3.66977900 | -4.27986600 | -0.38778400 |
| H  | -3.13578500 | -5.22710800 | -0.51009600 |
| H  | -4.19294700 | -4.31916500 | 0.57353400  |
| H  | -4.41652600 | -4.21702500 | -1.18674200 |
| C  | -1.63362300 | -3.33296900 | 0.68965000  |
| H  | -0.87983000 | -2.54960600 | 0.68860900  |
| H  | -2.13572600 | -3.33046700 | 1.66294500  |
| H  | -1.13372000 | -4.30009100 | 0.56727000  |
| C  | -1.95439500 | -3.18682200 | -1.82185100 |
| H  | -2.68638300 | -3.08217100 | -2.63047700 |
| H  | -1.21007700 | -2.39760000 | -1.92103000 |
| H  | -1.45264900 | -4.15321900 | -1.94132600 |
| C  | 2.67906100  | -3.12024600 | 0.12656900  |
| C  | 1.73467300  | -3.38359100 | -1.06706500 |
| H  | 0.95244800  | -2.63059700 | -1.12521900 |
| H  | 2.29677300  | -3.38124700 | -2.00788000 |
| H  | 1.26465000  | -4.36713600 | -0.95780700 |
| C  | 1.89004700  | -3.13274100 | 1.45671200  |
| H  | 1.16929500  | -2.31689600 | 1.50179200  |
| H  | 1.35049800  | -4.07959400 | 1.56587600  |
| H  | 2.57681000  | -3.03314300 | 2.30412600  |
| C  | 3.69632800  | -4.27402300 | 0.17461400  |
| H  | 4.29125700  | -4.33600300 | -0.74319800 |
| H  | 4.37980300  | -4.18748400 | 1.02581600  |
| H  | 3.15709800  | -5.21997400 | 0.28269300  |
| C  | 6.97650900  | -0.40280300 | -0.06996800 |
| C  | 7.55875100  | 1.01887100  | -0.11743300 |
| H  | 7.24049800  | 1.55521800  | -1.01734900 |
| H  | 7.26123900  | 1.60641200  | 0.75717400  |
| H  | 8.65203600  | 0.97140500  | -0.12811300 |
| C  | 7.48040900  | -1.17469800 | -1.30901600 |
| H  | 8.57563000  | -1.19939800 | -1.32522900 |
| H  | 7.12331600  | -2.20844500 | -1.31462400 |
| H  | 7.13423800  | -0.69658900 | -2.23082500 |
| C  | 7.49231100  | -1.09527900 | 1.21060000  |
| H  | 7.14062600  | -2.12837300 | 1.28230000  |
| H  | 8.58773800  | -1.11413900 | 1.22065600  |
| H  | 7.14961100  | -0.56309000 | 2.10347200  |
| C  | -6.91840400 | -0.42296800 | 0.21964100  |

|    |             |             |             |
|----|-------------|-------------|-------------|
| C  | -7.49746900 | 0.99530200  | 0.34466900  |
| H  | -7.07702800 | 1.52820700  | 1.20356400  |
| H  | -7.30873700 | 1.58936100  | -0.55555300 |
| H  | -8.58148300 | 0.94180700  | 0.48505900  |
| C  | -7.26074000 | -1.20195600 | 1.50853900  |
| H  | -8.34527300 | -1.23066800 | 1.66161600  |
| H  | -6.90239900 | -2.23435500 | 1.46441100  |
| H  | -6.80262400 | -0.72664500 | 2.38143100  |
| C  | -7.58520500 | -1.11392800 | -0.98999400 |
| H  | -7.23839400 | -2.14419800 | -1.11019300 |
| H  | -8.67314600 | -1.14069900 | -0.86332700 |
| H  | -7.36083400 | -0.57548600 | -1.91626500 |
| H  | 0.35279600  | 3.41228200  | 1.23499900  |
| H  | -0.33668600 | 3.40480000  | -1.71555500 |
| Cl | -0.26326300 | 0.74001400  | 2.10319600  |

**(salen)aCo<sup>III</sup>-Cl**

Charge: 0

Spin Multiplicity: 3

Sum of electronic and thermal Free Energies (a.u.): -2268.079933

No imaginary frequency

|    |             |             |             |
|----|-------------|-------------|-------------|
| C  | 4.75261700  | -1.62201700 | -0.05363900 |
| C  | 5.44943100  | -0.38769000 | -0.12215600 |
| C  | 3.37680600  | -1.75492900 | 0.01022400  |
| H  | 5.34769000  | -2.52576300 | -0.03992200 |
| C  | 4.68663200  | 0.75709700  | -0.10587500 |
| C  | 2.58771300  | -0.55284700 | -0.01059300 |
| C  | 3.27127600  | 0.69977900  | -0.04599000 |
| H  | 5.14996200  | 1.73750500  | -0.13456600 |
| O  | 1.28498000  | -0.64108000 | 0.00059300  |
| C  | 2.56404900  | 1.93321700  | -0.00413100 |
| Co | -0.00922000 | 0.69330200  | 0.02982600  |
| N  | 1.27435700  | 2.08217100  | 0.03336000  |
| H  | 3.18031900  | 2.83170700  | 0.01091900  |
| N  | -1.24890700 | 2.07071800  | -0.43481100 |
| C  | 0.63309500  | 3.39392400  | 0.21178400  |
| C  | -2.53697600 | 1.92207900  | -0.40688400 |
| C  | -0.60476800 | 3.36764900  | -0.69354200 |
| C  | 1.48798900  | 4.63301300  | -0.04545200 |
| H  | -3.16259000 | 2.80383400  | -0.54296100 |
| C  | -3.22810400 | 0.68824100  | -0.23961800 |
| C  | -1.46310100 | 4.61702300  | -0.49515000 |
| C  | 0.63584800  | 5.89724200  | 0.14679200  |
| H  | 1.88898400  | 4.60200900  | -1.06780500 |
| H  | 2.34088100  | 4.66035900  | 0.64031300  |
| C  | -4.63880000 | 0.73444800  | -0.13112000 |
| C  | -2.53585600 | -0.55860400 | -0.29157500 |
| C  | -0.61693300 | 5.87652500  | -0.73628500 |
| H  | -2.31670000 | 4.61434700  | -1.18083600 |
| H  | -1.86203100 | 4.61856900  | 0.52724600  |
| H  | 1.23833900  | 6.78536300  | -0.06996000 |
| H  | 0.33637400  | 5.96849700  | 1.20035100  |
| C  | -5.38912200 | -0.41794300 | -0.06151900 |
| H  | -5.10978500 | 1.71082800  | -0.09631300 |
| C  | -3.31181500 | -1.76638300 | -0.27506300 |
| O  | -1.23199300 | -0.62886700 | -0.39483400 |
| H  | -0.31763300 | 5.91169500  | -1.79246600 |
| H  | -1.22502300 | 6.76847100  | -0.55374900 |
| C  | -4.68529100 | -1.64560900 | -0.14573700 |
| H  | -5.27001600 | -2.55519400 | -0.10537000 |
| C  | -2.63014300 | -3.13626800 | -0.39259500 |
| C  | -3.64293900 | -4.29337800 | -0.33326700 |
| H  | -3.10539800 | -5.24189000 | -0.42593900 |
| H  | -4.18597700 | -4.31484900 | 0.61744700  |
| H  | -4.37243100 | -4.24730200 | -1.14907700 |
| C  | -1.63104700 | -3.32664100 | 0.76936700  |
| H  | -0.87233000 | -2.54790900 | 0.77213500  |
| H  | -2.15371100 | -3.30191000 | 1.73118400  |
| H  | -1.13424500 | -4.29865500 | 0.67682700  |

|    |             |             |             |
|----|-------------|-------------|-------------|
| C  | -1.90220500 | -3.22354700 | -1.75351900 |
| H  | -2.62099400 | -3.14359700 | -2.57659700 |
| H  | -1.16346300 | -2.42982900 | -1.85845300 |
| H  | -1.38905200 | -4.18697700 | -1.84339900 |
| C  | 2.70295200  | -3.12647500 | 0.15273800  |
| C  | 1.72480700  | -3.36794100 | -1.01770200 |
| H  | 0.94508400  | -2.61054100 | -1.04206900 |
| H  | 2.25991800  | -3.35459900 | -1.97396300 |
| H  | 1.25161700  | -4.34990200 | -0.90952000 |
| C  | 1.95261200  | -3.17092800 | 1.50438600  |
| H  | 1.22099500  | -2.36760500 | 1.58465000  |
| H  | 1.43027700  | -4.12764100 | 1.61176400  |
| H  | 2.66103100  | -3.07585100 | 2.33419900  |
| C  | 3.72602200  | -4.27603000 | 0.14752200  |
| H  | 4.29263300  | -4.31836100 | -0.78910500 |
| H  | 4.43480100  | -4.20213200 | 0.97899400  |
| H  | 3.19416800  | -5.22621800 | 0.25425100  |
| C  | 6.97993400  | -0.38977300 | -0.18982700 |
| C  | 7.55467200  | 1.03403100  | -0.25906800 |
| H  | 7.20021500  | 1.56971400  | -1.14577500 |
| H  | 7.28940300  | 1.62007300  | 0.62682000  |
| H  | 8.64680100  | 0.99029700  | -0.31223800 |
| C  | 7.43559400  | -1.15892600 | -1.44907800 |
| H  | 8.52927200  | -1.17934400 | -1.50956700 |
| H  | 7.08279500  | -2.19415300 | -1.44118500 |
| H  | 7.05072900  | -0.68145800 | -2.35575400 |
| C  | 7.54860300  | -1.08178600 | 1.06837500  |
| H  | 7.20365900  | -2.11619600 | 1.15295200  |
| H  | 8.64351700  | -1.09690200 | 1.03421400  |
| H  | 7.24042600  | -0.55169500 | 1.97492500  |
| C  | -6.91350700 | -0.43222400 | 0.08977400  |
| C  | -7.49818600 | 0.98761700  | 0.15749400  |
| H  | -7.10286600 | 1.54615800  | 1.01194500  |
| H  | -7.28611300 | 1.55585000  | -0.75417600 |
| H  | -8.58549300 | 0.93511600  | 0.26934200  |
| C  | -7.28928800 | -1.17456700 | 1.39091600  |
| H  | -8.37750600 | -1.20031800 | 1.51511600  |
| H  | -6.92936700 | -2.20734900 | 1.38601000  |
| H  | -6.85523200 | -0.67391300 | 2.26181900  |
| C  | -7.54413500 | -1.15989700 | -1.11765200 |
| H  | -7.19256400 | -2.19245900 | -1.19790500 |
| H  | -8.63504600 | -1.18573900 | -1.02065800 |
| H  | -7.29505100 | -0.64809100 | -2.05268700 |
| H  | 0.27648800  | 3.40049500  | 1.25053800  |
| H  | -0.24850100 | 3.34459300  | -1.73492100 |
| Cl | -0.46888200 | 0.92024500  | 2.33986700  |

**(salen)aCo<sup>III</sup>-Cl**

Charge: 0

Spin Multiplicity: 5

Sum of electronic and thermal Free Energies (a.u.): -2268.075405

No imaginary frequency

|    |             |             |             |
|----|-------------|-------------|-------------|
| C  | 4.85278300  | -1.60103500 | -0.35388800 |
| C  | 5.53462800  | -0.36123300 | -0.29519200 |
| C  | 3.47653600  | -1.74635600 | -0.27606700 |
| H  | 5.45302100  | -2.49438600 | -0.46720300 |
| C  | 4.76266600  | 0.77614500  | -0.15292000 |
| C  | 2.69280600  | -0.55614500 | -0.12157000 |
| C  | 3.35631400  | 0.70532700  | -0.06018100 |
| H  | 5.22323200  | 1.75702000  | -0.10237300 |
| O  | 1.39231800  | -0.64719000 | -0.05063100 |
| C  | 2.63326000  | 1.93834600  | 0.09222500  |
| Co | -0.00798700 | 0.49857500  | 0.45002400  |
| N  | 1.35500300  | 2.04848600  | 0.23795300  |
| H  | 3.25231000  | 2.83934100  | 0.09053000  |
| N  | -1.20072400 | 2.00420100  | -0.35011000 |
| C  | 0.67937000  | 3.33488500  | 0.38737600  |
| C  | -2.47583300 | 1.87400300  | -0.54741000 |
| C  | -0.52331000 | 3.29070400  | -0.57984500 |

|   |             |             |             |
|---|-------------|-------------|-------------|
| C | 1.51884700  | 4.59605400  | 0.18267500  |
| H | -3.05096200 | 2.74983000  | -0.85649900 |
| C | -3.25807300 | 0.68173800  | -0.39312200 |
| C | -1.38785700 | 4.54854000  | -0.43801100 |
| C | 0.64710000  | 5.84838500  | 0.34156000  |
| H | 1.96681900  | 4.58287300  | -0.82060500 |
| H | 2.34192500  | 4.62105300  | 0.90487400  |
| C | -4.65681300 | 0.79103600  | -0.57099600 |
| C | -2.66915900 | -0.58110300 | -0.09118900 |
| C | -0.54423200 | 5.81790000  | -0.62045300 |
| H | -2.19638400 | 4.54788900  | -1.17577300 |
| H | -1.85536800 | 4.54504800  | 0.55536100  |
| H | 1.25065400  | 6.74647300  | 0.17318200  |
| H | 0.28035800  | 5.90377400  | 1.37483900  |
| C | -5.48802900 | -0.30194700 | -0.43339500 |
| H | -5.06007600 | 1.76847400  | -0.81361500 |
| C | -3.51702300 | -1.72410000 | 0.07106500  |
| O | -1.37473300 | -0.70700000 | 0.01710000  |
| H | -0.17590100 | 5.86058900  | -1.65445500 |
| H | -1.17493200 | 6.70149800  | -0.47664800 |
| C | -4.87873300 | -1.53886500 | -0.10620800 |
| H | -5.52782700 | -2.39649700 | 0.01470700  |
| C | -2.91557400 | -3.08491000 | 0.45191700  |
| C | -3.99703700 | -4.17182600 | 0.58033300  |
| H | -3.52263000 | -5.11829100 | 0.85640200  |
| H | -4.72983800 | -3.93233900 | 1.35807300  |
| H | -4.53180000 | -4.33309400 | -0.36199600 |
| C | -2.19888900 | -2.96624500 | 1.81736500  |
| H | -1.40997000 | -2.21489800 | 1.79547800  |
| H | -2.91084400 | -2.69036100 | 2.60216800  |
| H | -1.75326800 | -3.93030600 | 2.08688400  |
| C | -1.91209200 | -3.54419500 | -0.63037700 |
| H | -2.40873700 | -3.64211800 | -1.60205000 |
| H | -1.08848100 | -2.83917400 | -0.72896300 |
| H | -1.49964100 | -4.52295400 | -0.36102000 |
| C | 2.79174600  | -3.11855500 | -0.36711700 |
| C | 1.86959800  | -3.15141700 | -1.60795700 |
| H | 1.10511900  | -2.37687100 | -1.55096900 |
| H | 2.45194000  | -3.00306700 | -2.52400500 |
| H | 1.37142900  | -4.12460300 | -1.67649100 |
| C | 1.96473100  | -3.38976400 | 0.91134200  |
| H | 1.17947300  | -2.64759000 | 1.04554800  |
| H | 1.49813900  | -4.37884400 | 0.84503100  |
| H | 2.60929700  | -3.37813900 | 1.79661500  |
| C | 3.81464400  | -4.25888500 | -0.51282200 |
| H | 4.41576400  | -4.15955600 | -1.42295600 |
| H | 4.49228400  | -4.31378700 | 0.34578100  |
| H | 3.28168100  | -5.21240500 | -0.57348300 |
| C | 7.06402300  | -0.33873900 | -0.38862900 |
| C | 7.62653900  | 1.08945100  | -0.30742800 |
| H | 7.25800600  | 1.71631000  | -1.12595300 |
| H | 7.36771900  | 1.57240700  | 0.64031400  |
| H | 8.71818700  | 1.06115900  | -0.37763900 |
| C | 7.50484200  | -0.95762100 | -1.73332600 |
| H | 8.59735900  | -0.95627100 | -1.81393200 |
| H | 7.16446000  | -1.99201000 | -1.83454700 |
| H | 7.09822000  | -0.38767200 | -2.57471400 |
| C | 7.65976000  | -1.16122700 | 0.77507700  |
| H | 7.32480900  | -2.20196500 | 0.74892100  |
| H | 8.75395200  | -1.16091700 | 0.72132000  |
| H | 7.36325800  | -0.73876300 | 1.74015100  |
| C | -7.00932700 | -0.23613800 | -0.60706200 |
| C | -7.48910500 | 1.18102800  | -0.95937400 |
| H | -7.23831800 | 1.89971100  | -0.17251700 |
| H | -7.05281700 | 1.53312500  | -1.89983900 |
| H | -8.57709200 | 1.18460400  | -1.07681100 |
| C | -7.69451600 | -0.66655300 | 0.70847100  |
| H | -8.78424000 | -0.63113900 | 0.60106400  |
| H | -7.42052800 | -1.68632900 | 0.99324200  |

|    |             |             |             |
|----|-------------|-------------|-------------|
| H  | -7.40846200 | -0.00218300 | 1.52980800  |
| C  | -7.43704300 | -1.18922000 | -1.74456900 |
| H  | -7.15323400 | -2.22425200 | -1.53410900 |
| H  | -8.52410000 | -1.16154800 | -1.87789200 |
| H  | -6.96795900 | -0.89959000 | -2.69019900 |
| H  | 0.27110500  | 3.33675900  | 1.40809200  |
| H  | -0.10893400 | 3.25767200  | -1.59952700 |
| Cl | -0.19696900 | 0.68262900  | 2.69995900  |

**H<sub>2</sub>O-aCo<sup>III</sup>-Cl**

Charge: 0

Spin Multiplicity: 1

Sum of electronic and thermal Free Energies (a.u.): -2344.508164

No imaginary frequency

|    |             |             |             |
|----|-------------|-------------|-------------|
| C  | 4.76466300  | -1.62350400 | 0.07840300  |
| C  | 5.44840400  | -0.38296600 | 0.11798000  |
| C  | 3.38839100  | -1.76895800 | 0.02755100  |
| H  | 5.36708800  | -2.52240700 | 0.10262600  |
| C  | 4.66747400  | 0.75078000  | 0.12485500  |
| C  | 2.58550100  | -0.57722200 | -0.02333600 |
| C  | 3.25327700  | 0.68189400  | 0.05844000  |
| H  | 5.11848200  | 1.73595800  | 0.18363000  |
| O  | 1.28939300  | -0.68851800 | -0.16360800 |
| C  | 2.54275800  | 1.92106700  | 0.12241700  |
| Co | -0.00606700 | 0.69551800  | -0.20143500 |
| N  | 1.26240800  | 2.08261600  | 0.04956800  |
| H  | 3.16277100  | 2.80677000  | 0.26483600  |
| N  | -1.28340900 | 2.08562700  | -0.42524000 |
| C  | 0.60648700  | 3.37664400  | 0.27844400  |
| C  | -2.56284100 | 1.93336800  | -0.32629700 |
| C  | -0.63322700 | 3.38430600  | -0.63080600 |
| C  | 1.45767800  | 4.62807300  | 0.06334900  |
| H  | -3.19292500 | 2.82267300  | -0.35817200 |
| C  | -3.25189500 | 0.68663500  | -0.18676100 |
| C  | -1.48784400 | 4.62956500  | -0.39819300 |
| C  | 0.60757900  | 5.88835200  | 0.28354400  |
| H  | 1.86504900  | 4.62058300  | -0.95663400 |
| H  | 2.30732000  | 4.63890200  | 0.75333700  |
| C  | -4.64220200 | 0.73935300  | 0.06635400  |
| C  | -2.58399600 | -0.56061500 | -0.35887300 |
| C  | -0.64066400 | 5.89361600  | -0.60602000 |
| H  | -2.34284800 | 4.64235100  | -1.08236700 |
| H  | -1.88671100 | 4.60875800  | 0.62436100  |
| H  | 1.21348400  | 6.78044100  | 0.09371900  |
| H  | 0.30185100  | 5.93387900  | 1.33703300  |
| C  | -5.39831900 | -0.40882800 | 0.17182100  |
| H  | -5.09629300 | 1.71776700  | 0.18336400  |
| C  | -3.35978700 | -1.76067700 | -0.26319300 |
| O  | -1.30291400 | -0.63026200 | -0.64969000 |
| H  | -0.33620000 | 5.95339200  | -1.65952000 |
| H  | -1.24757900 | 6.78236200  | -0.40439500 |
| C  | -4.71694800 | -1.63634600 | -0.00322100 |
| H  | -5.30125200 | -2.54381500 | 0.07748900  |
| Cl | -0.37725400 | 0.60704200  | 1.99475800  |
| O  | 0.29197300  | 0.61257600  | -2.23811000 |
| H  | -0.49367900 | 0.03467700  | -2.32561800 |
| H  | 1.03228300  | -0.01903500 | -2.20160600 |
| H  | 0.24673700  | 3.35164500  | 1.31619200  |
| H  | -0.27102300 | 3.38908900  | -1.66948200 |
| C  | -2.69454700 | -3.13557500 | -0.42603900 |
| C  | -3.69929400 | -4.28915900 | -0.25997600 |
| H  | -4.49377700 | -4.25811600 | -1.01360100 |
| H  | -3.17241500 | -5.24130400 | -0.37532200 |
| H  | -4.16265700 | -4.28799900 | 0.73203100  |
| C  | -1.59919100 | -3.30251400 | 0.64871300  |
| H  | -0.85522500 | -2.51253700 | 0.57688000  |
| H  | -2.03821300 | -3.27096300 | 1.65118400  |
| H  | -1.09878900 | -4.26949500 | 0.52593700  |
| C  | -2.07692700 | -3.25989200 | -1.83728700 |

|   |             |             |             |
|---|-------------|-------------|-------------|
| H | -2.84926600 | -3.15624200 | -2.60764700 |
| H | -1.31568700 | -2.49755500 | -1.99911100 |
| H | -1.60832100 | -4.24296700 | -1.95628300 |
| C | 2.72106400  | -3.15153300 | 0.08645100  |
| C | 1.90314000  | -3.23564700 | 1.39600900  |
| H | 2.57090500  | -3.17051400 | 2.26155500  |
| H | 1.17442300  | -2.42829000 | 1.46315300  |
| H | 1.37003000  | -4.19115900 | 1.44880900  |
| C | 1.80409000  | -3.38132400 | -1.13675400 |
| H | 0.98540900  | -2.66538500 | -1.15635800 |
| H | 2.37729700  | -3.29628900 | -2.06774400 |
| H | 1.37847800  | -4.38996200 | -1.09704700 |
| C | 3.75492600  | -4.29156900 | 0.10314800  |
| H | 4.37242800  | -4.30027300 | -0.80186000 |
| H | 4.41702600  | -4.23512100 | 0.97322300  |
| H | 3.22924600  | -5.24988000 | 0.15437500  |
| C | 6.97958900  | -0.36465100 | 0.17340400  |
| C | 7.53651100  | 1.06738600  | 0.21356300  |
| H | 7.24419800  | 1.63884300  | -0.67350600 |
| H | 7.19292000  | 1.60922500  | 1.10068400  |
| H | 8.63012200  | 1.03942400  | 0.24529700  |
| C | 7.45908800  | -1.10615400 | 1.44041300  |
| H | 7.12409500  | -2.14726300 | 1.45125500  |
| H | 8.55354200  | -1.10713100 | 1.49330800  |
| H | 7.07181000  | -0.62166500 | 2.34215300  |
| C | 7.54636400  | -1.06989200 | -1.07802100 |
| H | 8.64173100  | -1.07704800 | -1.05189100 |
| H | 7.20759800  | -2.10775600 | -1.14511200 |
| H | 7.22839300  | -0.55503300 | -1.99026900 |
| C | -6.90282700 | -0.41340800 | 0.46338300  |
| C | -7.46336700 | 1.00955100  | 0.61715000  |
| H | -6.98742800 | 1.54297500  | 1.44624400  |
| H | -7.32578000 | 1.59855000  | -0.29563800 |
| H | -8.53712900 | 0.96465000  | 0.82403600  |
| C | -7.16794900 | -1.18289500 | 1.77577700  |
| H | -8.24052700 | -1.20221200 | 1.99907000  |
| H | -6.82116000 | -2.21835600 | 1.71408800  |
| H | -6.65022600 | -0.70729400 | 2.61448900  |
| C | -7.65071600 | -1.10556500 | -0.69692900 |
| H | -7.31808200 | -2.13849700 | -0.83366100 |
| H | -8.72853500 | -1.12519100 | -0.50084000 |
| H | -7.48314700 | -0.57309500 | -1.63862300 |

**H<sub>2</sub>O-aCo<sup>III</sup>-Cl**

Charge: 0

Spin Multiplicity: 3

Sum of electronic and thermal Free Energies (a.u.): -2344.504465

No imaginary frequency

|    |             |             |             |
|----|-------------|-------------|-------------|
| C  | 4.75720900  | -1.61918400 | 0.03464300  |
| C  | 5.44400500  | -0.37881200 | -0.00079400 |
| C  | 3.38176900  | -1.76177000 | 0.09328800  |
| H  | 5.35829000  | -2.51904000 | 0.02292200  |
| C  | 4.67115700  | 0.75950000  | 0.03741200  |
| C  | 2.58353100  | -0.56591700 | 0.10222900  |
| C  | 3.25623500  | 0.69315400  | 0.08782900  |
| H  | 5.12795500  | 1.74332800  | 0.03007700  |
| O  | 1.28072600  | -0.66934300 | 0.11522900  |
| C  | 2.54425700  | 1.92720300  | 0.15229500  |
| Co | -0.01307800 | 0.68234600  | 0.02661700  |
| N  | 1.25715400  | 2.07603600  | 0.16276300  |
| H  | 3.16152100  | 2.82337700  | 0.21105800  |
| N  | -1.25692300 | 2.07455000  | -0.39375800 |
| C  | 0.60188400  | 3.37996600  | 0.33774900  |
| C  | -2.54153000 | 1.92591600  | -0.38301500 |
| C  | -0.59379200 | 3.36344800  | -0.62667800 |
| C  | 1.46695000  | 4.62255500  | 0.13703400  |
| H  | -3.16680100 | 2.80938400  | -0.51206200 |
| C  | -3.23597700 | 0.68658400  | -0.22858100 |
| C  | -1.45482800 | 4.61653600  | -0.47172300 |



|    |             |             |             |
|----|-------------|-------------|-------------|
| C  | 0.60673000  | 5.88618300  | 0.29104200  |
| H  | 1.92027900  | 4.59829900  | -0.86327700 |
| H  | 2.28294300  | 4.64336400  | 0.86678300  |
| C  | -4.64137200 | 0.73892100  | -0.08223400 |
| C  | -2.55456100 | -0.56223100 | -0.30795700 |
| C  | -0.59230700 | 5.87310200  | -0.66351500 |
| H  | -2.27100000 | 4.61588100  | -1.20182100 |
| H  | -1.90753500 | 4.62042900  | 0.52826300  |
| H  | 1.22196800  | 6.77488100  | 0.11638000  |
| H  | 0.24662700  | 5.95001600  | 1.32604300  |
| C  | -5.39587200 | -0.41089200 | 0.01150600  |
| H  | -5.10713300 | 1.71716900  | -0.03309900 |
| C  | -3.32832600 | -1.76490100 | -0.24274700 |
| O  | -1.25128700 | -0.63301400 | -0.48381800 |
| H  | -0.23208400 | 5.90784500  | -1.70038700 |
| H  | -1.20635100 | 6.76730100  | -0.51483300 |
| C  | -4.69969300 | -1.63989000 | -0.07763600 |
| H  | -5.28481200 | -2.54734900 | -0.00674700 |
| Cl | -0.59606700 | 0.78488200  | 2.32895500  |
| O  | 0.42411500  | 0.36381200  | -2.45248600 |
| H  | -0.35617500 | -0.18890300 | -2.27725400 |
| H  | 1.15959600  | -0.22967000 | -2.24439700 |
| H  | 0.19846400  | 3.36804600  | 1.35909500  |
| H  | -0.18888100 | 3.32556000  | -1.64824700 |
| C  | -2.65027600 | -3.13968600 | -0.33356000 |
| C  | -3.66136900 | -4.29258300 | -0.20257800 |
| H  | -4.41089700 | -4.27916000 | -1.00126300 |
| H  | -3.12677100 | -5.24498500 | -0.26871300 |
| H  | -4.18055700 | -4.27327700 | 0.76114200  |
| C  | -1.61958400 | -3.28600100 | 0.80719100  |
| H  | -0.86595600 | -2.50312000 | 0.76586100  |
| H  | -2.11685800 | -3.22962600 | 1.78071200  |
| H  | -1.12018400 | -4.25852300 | 0.73509000  |
| C  | -1.95904500 | -3.28663700 | -1.70798500 |
| H  | -2.69303400 | -3.21369300 | -2.51801000 |
| H  | -1.20177500 | -2.51740900 | -1.85397800 |
| H  | -1.46958900 | -4.26386100 | -1.77992300 |
| C  | 2.71335900  | -3.14084300 | 0.18585000  |
| C  | 1.96250100  | -3.24076900 | 1.53398700  |
| H  | 2.67094700  | -3.17525900 | 2.36648500  |
| H  | 1.22789900  | -2.44379200 | 1.64449100  |
| H  | 1.44417800  | -4.20318900 | 1.60440700  |
| C  | 1.73435800  | -3.34402400 | -0.99256800 |
| H  | 0.93431800  | -2.60747800 | -0.96988200 |
| H  | 2.26406300  | -3.27055700 | -1.94976000 |
| H  | 1.28292100  | -4.34017600 | -0.93527900 |
| C  | 3.74155300  | -4.28458000 | 0.13439800  |
| H  | 4.30712500  | -4.28817200 | -0.80385000 |
| H  | 4.45133800  | -4.23785100 | 0.96674800  |
| H  | 3.21527900  | -5.24108400 | 0.20653900  |
| C  | 6.97482000  | -0.36634400 | -0.06408000 |
| C  | 7.53773600  | 1.06354500  | -0.09411300 |
| H  | 7.18282600  | 1.61893800  | -0.96840800 |
| H  | 7.26358400  | 1.62434100  | 0.80529100  |
| H  | 8.63041100  | 1.03031500  | -0.14337700 |
| C  | 7.54594500  | -1.08649500 | 1.17704300  |
| H  | 7.20933900  | -2.12559500 | 1.23342500  |
| H  | 8.64102100  | -1.09180800 | 1.14565300  |
| H  | 7.23101400  | -0.58302500 | 2.09634400  |
| C  | 7.44070300  | -1.09805200 | -1.34178500 |
| H  | 8.53464900  | -1.10720500 | -1.39985400 |
| H  | 7.09736600  | -2.13633200 | -1.36203000 |
| H  | 7.05405700  | -0.60028000 | -2.23674500 |
| C  | -6.91612100 | -0.41645500 | 0.20291100  |
| C  | -7.49260200 | 1.00677200  | 0.27066200  |
| H  | -7.07523300 | 1.57142100  | 1.11047900  |
| H  | -7.29907000 | 1.56546700  | -0.65097500 |
| H  | -8.57724500 | 0.96046100  | 0.40825300  |
| C  | -7.26154200 | -1.14316200 | 1.52112900  |

|   |             |             |             |
|---|-------------|-------------|-------------|
| H | -8.34621300 | -1.16137800 | 1.67446800  |
| H | -6.90757900 | -2.17803000 | 1.51740900  |
| H | -6.80151600 | -0.63623600 | 2.37487900  |
| C | -7.58109300 | -1.15363200 | -0.97998100 |
| H | -7.23577500 | -2.18849000 | -1.05841200 |
| H | -8.66923000 | -1.17382700 | -0.85452900 |
| H | -7.35439500 | -0.65267100 | -1.92653400 |

### H<sub>2</sub>O-aCo<sup>III</sup>-Cl

Charge: 0

Spin Multiplicity: 5

Sum of electronic and thermal Free Energies (a.u.): -2344.496738

No imaginary frequency

|    |             |             |             |
|----|-------------|-------------|-------------|
| C  | 4.95372000  | -1.54038500 | 0.01887400  |
| C  | 5.58286600  | -0.27513400 | 0.07846800  |
| C  | 3.58020000  | -1.73252600 | -0.01371000 |
| H  | 5.59108000  | -2.41490100 | 0.00200600  |
| C  | 4.75986200  | 0.83545300  | 0.11689700  |
| C  | 2.74918800  | -0.56846600 | -0.00127400 |
| C  | 3.35400500  | 0.71798400  | 0.08274200  |
| H  | 5.18025300  | 1.83356200  | 0.17807100  |
| O  | 1.44919000  | -0.70697000 | -0.08414100 |
| C  | 2.58545800  | 1.93604600  | 0.16881400  |
| Co | -0.03261000 | 0.43625600  | 0.02664900  |
| N  | 1.30006200  | 2.03145700  | 0.16512300  |
| H  | 3.18878900  | 2.84172800  | 0.26944300  |
| N  | -1.27732100 | 2.02188800  | -0.47006600 |
| C  | 0.60315800  | 3.30886400  | 0.32769300  |
| C  | -2.56399700 | 1.92309500  | -0.42859500 |
| C  | -0.58043700 | 3.29337500  | -0.66897900 |
| C  | 1.44879600  | 4.57516600  | 0.17311700  |
| H  | -3.17117200 | 2.82778600  | -0.50903700 |
| C  | -3.31877900 | 0.70497000  | -0.27533900 |
| C  | -1.43100900 | 4.56057200  | -0.54956200 |
| C  | 0.58137600  | 5.83387700  | 0.29896500  |
| H  | 1.94238100  | 4.56361600  | -0.80841800 |
| H  | 2.23804700  | 4.59621800  | 0.93201400  |
| C  | -4.71189400 | 0.82433800  | -0.08218200 |
| C  | -2.71449100 | -0.58224500 | -0.35838600 |
| C  | -0.56792500 | 5.81791300  | -0.71245700 |
| H  | -2.22352700 | 4.55606100  | -1.30563600 |
| H  | -1.92001700 | 4.57443400  | 0.43371600  |
| H  | 1.20143800  | 6.72593500  | 0.16076200  |
| H  | 0.17035800  | 5.89016500  | 1.31561100  |
| C  | -5.51842000 | -0.28802200 | 0.06484700  |
| H  | -5.13186800 | 1.82356200  | -0.03952100 |
| C  | -3.52986200 | -1.74523200 | -0.21100100 |
| O  | -1.42656800 | -0.70286900 | -0.60068300 |
| H  | -0.15760200 | 5.84767600  | -1.73079600 |
| H  | -1.19104400 | 6.71126600  | -0.59881200 |
| C  | -4.88834600 | -1.55239600 | -0.00222500 |
| H  | -5.51305200 | -2.42748200 | 0.12139000  |
| Cl | -0.54355500 | 0.40037300  | 2.26930500  |
| O  | 0.30711500  | 0.34967000  | -2.41055100 |
| H  | -0.50930200 | -0.17380000 | -2.34087400 |
| H  | 1.01130300  | -0.30155500 | -2.27629100 |
| H  | 0.16861500  | 3.28079100  | 1.33711600  |
| H  | -0.14397000 | 3.24644900  | -1.67716700 |
| C  | -2.90133900 | -3.14695900 | -0.25651000 |
| C  | -3.95288600 | -4.25243300 | -0.05623700 |
| H  | -4.71844100 | -4.24004700 | -0.83957700 |
| H  | -3.45911600 | -5.22816600 | -0.09275300 |
| H  | -4.45033800 | -4.17167900 | 0.91570800  |
| C  | -1.85178900 | -3.28304100 | 0.87026200  |
| H  | -1.05938500 | -2.54345900 | 0.77037700  |
| H  | -2.31860700 | -3.14768600 | 1.85071400  |
| H  | -1.40220100 | -4.28209600 | 0.84006600  |
| C  | -2.23129900 | -3.38361600 | -1.62926000 |
| H  | -2.96444800 | -3.29884100 | -2.43888400 |

|   |             |             |             |
|---|-------------|-------------|-------------|
| H | -1.43192200 | -2.66420400 | -1.80534300 |
| H | -1.80134000 | -4.39066600 | -1.66528100 |
| C | 2.94712500  | -3.13278200 | -0.03672700 |
| C | 2.09972600  | -3.32834000 | 1.24214200  |
| H | 2.73375000  | -3.27361400 | 2.13313200  |
| H | 1.32196700  | -2.56956400 | 1.32717400  |
| H | 1.62129800  | -4.31393000 | 1.22584800  |
| C | 2.05343300  | -3.30782800 | -1.28747700 |
| H | 1.20095200  | -2.62986200 | -1.26179400 |
| H | 2.62748800  | -3.12726100 | -2.20353500 |
| H | 1.66989400  | -4.33297600 | -1.32809400 |
| C | 4.01461400  | -4.24047900 | -0.07206200 |
| H | 4.63988000  | -4.18035200 | -0.96950800 |
| H | 4.66678600  | -4.20913300 | 0.80671000  |
| H | 3.51974900  | -5.21616900 | -0.07831200 |
| C | 7.11323200  | -0.19510800 | 0.10880500  |
| C | 7.61441000  | 1.25656100  | 0.17453000  |
| H | 7.28861900  | 1.83645800  | -0.69511200 |
| H | 7.26392400  | 1.76463700  | 1.07869100  |
| H | 8.70850000  | 1.26939300  | 0.19056100  |
| C | 7.64195100  | -0.94674000 | 1.35014100  |
| H | 7.35020900  | -2.00073500 | 1.34048100  |
| H | 8.73605800  | -0.90346100 | 1.38550600  |
| H | 7.25072600  | -0.50012100 | 2.26951300  |
| C | 7.68528100  | -0.84780700 | -1.16871300 |
| H | 8.78002800  | -0.80744500 | -1.16111100 |
| H | 7.39093700  | -1.89776100 | -1.25365100 |
| H | 7.32920700  | -0.32705000 | -2.06324800 |
| C | -7.03134300 | -0.21132100 | 0.29836700  |
| C | -7.53610100 | 1.24003200  | 0.33760900  |
| H | -7.06997900 | 1.80770000  | 1.14929800  |
| H | -7.34016500 | 1.76178000  | -0.60487500 |
| H | -8.61769200 | 1.25098300  | 0.50380300  |
| C | -7.37524300 | -0.88032300 | 1.64725600  |
| H | -8.45459400 | -0.83802300 | 1.83066700  |
| H | -7.07451900 | -1.93168200 | 1.66591400  |
| H | -6.86582000 | -0.37287100 | 2.47222800  |
| C | -7.76554200 | -0.94885500 | -0.84270400 |
| H | -7.47343600 | -2.00137500 | -0.89856000 |
| H | -8.84937500 | -0.91100000 | -0.68723700 |
| H | -7.54168000 | -0.48781700 | -1.80997500 |

**PO-aCo<sup>III</sup>-Cl**

Charge: 0

Spin Multiplicity: 1

Sum of electronic and thermal Free Energies (a.u.): -2461.155374

No imaginary frequency

|    |             |             |             |
|----|-------------|-------------|-------------|
| C  | -4.69003300 | -1.58258100 | -0.25508500 |
| C  | -5.35754000 | -0.33983200 | -0.11297200 |
| C  | -3.32277900 | -1.73484300 | -0.41013200 |
| H  | -5.30157800 | -2.47572800 | -0.25511200 |
| C  | -4.57265000 | 0.78994200  | -0.17436200 |
| C  | -2.50002200 | -0.55141800 | -0.37220800 |
| C  | -3.16413300 | 0.71388500  | -0.30569600 |
| H  | -5.01681800 | 1.77865600  | -0.11923300 |
| O  | -1.20606300 | -0.67967000 | -0.39885500 |
| C  | -2.45552000 | 1.95078900  | -0.43065600 |
| Co | 0.06687200  | 0.69537300  | -0.13517000 |
| N  | -1.17300100 | 2.09303800  | -0.45840800 |
| H  | -3.07674400 | 2.84248900  | -0.52574200 |
| N  | 1.31715300  | 2.08226600  | 0.23262800  |
| C  | -0.49370800 | 3.37210000  | -0.66777700 |
| C  | 2.59888900  | 1.91627500  | 0.28157700  |
| C  | 0.66581900  | 3.39245800  | 0.34611700  |
| C  | -1.34476700 | 4.63597900  | -0.56383000 |
| H  | 3.23024300  | 2.79806300  | 0.39682900  |
| C  | 3.28937300  | 0.66805800  | 0.18657000  |
| C  | 1.55133800  | 4.62288900  | 0.15011100  |
| C  | -0.46209300 | 5.87768500  | -0.75867600 |

|   |             |             |             |
|---|-------------|-------------|-------------|
| H | -1.83042500 | 4.67378400  | 0.42092500  |
| H | -2.13834700 | 4.62345800  | -1.31821500 |
| C | 4.70206600  | 0.71730200  | 0.10838400  |
| C | 2.59692900  | -0.58136500 | 0.19397700  |
| C | 0.70464700  | 5.90186700  | 0.23546100  |
| H | 2.34160200  | 4.65507600  | 0.90770500  |
| H | 2.04085800  | 4.55994600  | -0.83029400 |
| H | -1.06785400 | 6.78400400  | -0.65487700 |
| H | -0.06637400 | 5.87866300  | -1.78265900 |
| C | 5.46022600  | -0.42908900 | 0.01415600  |
| H | 5.17152800  | 1.69565200  | 0.11326100  |
| C | 3.37811600  | -1.78189400 | 0.08891400  |
| O | 1.29935500  | -0.66166200 | 0.33804100  |
| H | 0.30958700  | 6.00422700  | 1.25532100  |
| H | 1.33878000  | 6.77645200  | 0.05655000  |
| C | 4.75555600  | -1.65775400 | 0.00596100  |
| H | 5.34071100  | -2.56449400 | -0.07928700 |
| C | -0.85917100 | -0.44827300 | 2.50889300  |
| C | 0.29186300  | 0.36542900  | 2.91626600  |
| O | -0.54729200 | 0.79939100  | 1.80968000  |
| H | -0.63708500 | -1.30824400 | 1.88826600  |
| H | 1.28440000  | 0.05138800  | 2.61235900  |
| H | 0.21709000  | 1.02082900  | 3.78051600  |
| C | -2.18018800 | -0.45258500 | 3.21898500  |
| H | -2.99068200 | -0.55903600 | 2.49224000  |
| H | -2.22643500 | -1.30152400 | 3.90900000  |
| H | -2.32964500 | 0.47078300  | 3.78537400  |
| C | -2.68900600 | -3.11337600 | -0.65608100 |
| C | -1.96878400 | -3.09438100 | -2.02476300 |
| H | -2.69059900 | -2.92575800 | -2.83098800 |
| H | -1.21410800 | -2.30901300 | -2.06482500 |
| H | -1.47860700 | -4.05791300 | -2.20392900 |
| C | -1.67897000 | -3.46306500 | 0.45825700  |
| H | -0.83578100 | -2.77743900 | 0.44148300  |
| H | -2.15867400 | -3.42565900 | 1.44359600  |
| H | -1.29483000 | -4.47840800 | 0.31110700  |
| C | -3.74329900 | -4.23377700 | -0.69346800 |
| H | -4.27108600 | -4.33558500 | 0.26134800  |
| H | -4.48486700 | -4.07403600 | -1.48291900 |
| H | -3.24533500 | -5.18648400 | -0.89771900 |
| C | 2.68889300  | -3.15364900 | 0.05736000  |
| C | 3.69430300  | -4.30510600 | -0.11993100 |
| H | 4.25348600  | -4.21774400 | -1.05720900 |
| H | 4.41072900  | -4.36113400 | 0.70694500  |
| H | 3.14976400  | -5.25400500 | -0.14832800 |
| C | 1.94836400  | -3.38971600 | 1.39311500  |
| H | 2.65959100  | -3.40836500 | 2.22674400  |
| H | 1.21832400  | -2.60336200 | 1.57747800  |
| H | 1.42433000  | -4.35151600 | 1.37170000  |
| C | 1.70028500  | -3.20845000 | -1.12945700 |
| H | 1.18227200  | -4.17406700 | -1.13955300 |
| H | 0.96028700  | -2.41314700 | -1.07169600 |
| H | 2.24003300  | -3.10248700 | -2.07606200 |
| C | 6.98914500  | -0.43349300 | -0.08818500 |
| C | 7.57180500  | 0.98856100  | -0.05939300 |
| H | 7.20770600  | 1.59029700  | -0.89830700 |
| H | 7.32145500  | 1.50840600  | 0.87129200  |
| H | 8.66301500  | 0.94411700  | -0.13155400 |
| C | 7.58281300  | -1.22360900 | 1.09844600  |
| H | 7.22894500  | -2.25845700 | 1.11246000  |
| H | 8.67662300  | -1.24551600 | 1.03668000  |
| H | 7.30229300  | -0.76171000 | 2.05054600  |
| C | 7.41344900  | -1.10360500 | -1.41325400 |
| H | 7.05684400  | -2.13562100 | -1.47636400 |
| H | 7.00682700  | -0.55760400 | -2.27011900 |
| H | 8.50552200  | -1.12111100 | -1.50226900 |
| C | -6.87866400 | -0.31460700 | 0.06792900  |
| C | -7.41882400 | 1.11855400  | 0.19714000  |
| H | -6.98476500 | 1.63673100  | 1.05854700  |

|    |             |             |             |
|----|-------------|-------------|-------------|
| H  | -7.21090100 | 1.71027000  | -0.70019800 |
| H  | -8.50438000 | 1.09555800  | 0.33491200  |
| C  | -7.25324200 | -1.09033600 | 1.34973300  |
| H  | -8.33948000 | -1.09514200 | 1.49415900  |
| H  | -6.91776300 | -2.13049200 | 1.30407200  |
| H  | -6.79256900 | -0.62899600 | 2.22936500  |
| C  | -7.55794300 | -0.97955000 | -1.14918900 |
| H  | -7.24071100 | -2.01902900 | -1.27194000 |
| H  | -8.64742700 | -0.97477100 | -1.03160600 |
| H  | -7.30935200 | -0.44401600 | -2.07074100 |
| H  | 0.21177300  | 3.43568700  | 1.34799300  |
| H  | -0.04614200 | 3.31370100  | -1.66867200 |
| Cl | 0.66217000  | 0.66648300  | -2.29133400 |

**PO-aCo<sup>III</sup>-Cl**

Charge: 0

Spin Multiplicity: 3

Sum of electronic and thermal Free Energies (a.u.): -2461.151444

No imaginary frequency

|    |             |             |             |
|----|-------------|-------------|-------------|
| C  | -4.65791300 | -1.57698700 | -0.28080700 |
| C  | -5.31930100 | -0.34261000 | -0.05284600 |
| C  | -3.30005300 | -1.71841600 | -0.50729200 |
| H  | -5.26739500 | -2.47123900 | -0.28703700 |
| C  | -4.54404200 | 0.79393400  | -0.10527100 |
| C  | -2.48458000 | -0.53235800 | -0.46204400 |
| C  | -3.14392300 | 0.72681200  | -0.31102000 |
| H  | -4.98708600 | 1.77671700  | 0.01628500  |
| O  | -1.19077600 | -0.64456000 | -0.56155900 |
| C  | -2.43437400 | 1.96078500  | -0.41146700 |
| Co | 0.10020900  | 0.69289500  | -0.30038500 |
| N  | -1.15066400 | 2.09711200  | -0.50303400 |
| H  | -3.04956300 | 2.86059900  | -0.43021000 |
| N  | 1.32645800  | 2.08254800  | 0.19137800  |
| C  | -0.47713800 | 3.38634800  | -0.68147600 |
| C  | 2.60451000  | 1.91669700  | 0.29613100  |
| C  | 0.66815100  | 3.38624400  | 0.34520400  |
| C  | -1.33543800 | 4.64297200  | -0.56323000 |
| H  | 3.22941200  | 2.79205300  | 0.47489500  |
| C  | 3.29294500  | 0.66870400  | 0.19794300  |
| C  | 1.55264500  | 4.62336400  | 0.18898100  |
| C  | -0.45184400 | 5.88884700  | -0.72685600 |
| H  | -1.82890100 | 4.66520300  | 0.41818300  |
| H  | -2.12155300 | 4.64003000  | -1.32570100 |
| C  | 4.70688200  | 0.70331400  | 0.18367500  |
| C  | 2.59089400  | -0.57229200 | 0.17858800  |
| C  | 0.69961600  | 5.89765100  | 0.28515200  |
| H  | 2.32926000  | 4.64426700  | 0.96084600  |
| H  | 2.05787000  | 4.58015600  | -0.78435000 |
| H  | -1.06053100 | 6.79237900  | -0.61674500 |
| H  | -0.04177700 | 5.90605600  | -1.74483700 |
| C  | 5.45366900  | -0.45334300 | 0.12199700  |
| H  | 5.18685100  | 1.67576500  | 0.20773600  |
| C  | 3.35633400  | -1.78343400 | 0.12594600  |
| O  | 1.28178700  | -0.63547400 | 0.25024300  |
| H  | 0.28886800  | 5.97993900  | 1.30058000  |
| H  | 1.33381900  | 6.77697400  | 0.13185000  |
| C  | 4.73756700  | -1.67455200 | 0.09424100  |
| H  | 5.31547000  | -2.58778400 | 0.03722000  |
| C  | -1.09176600 | -0.49087400 | 2.52505600  |
| C  | 0.09470400  | 0.19770600  | 3.04520400  |
| O  | -0.69528600 | 0.80056600  | 1.99644700  |
| H  | -0.91197700 | -1.29109800 | 1.81460300  |
| H  | 1.07996900  | -0.13126300 | 2.72576000  |
| H  | 0.04034500  | 0.72071800  | 3.99841400  |
| C  | -2.41653200 | -0.52058000 | 3.23333500  |
| H  | -3.23114000 | -0.48413300 | 2.50327600  |
| H  | -2.51700200 | -1.44759700 | 3.80775400  |
| H  | -2.51741100 | 0.32845500  | 3.91546400  |
| C  | -2.67188300 | -3.08505400 | -0.82008200 |

|    |             |             |             |
|----|-------------|-------------|-------------|
| C  | -1.97305000 | -3.02007200 | -2.19851300 |
| H  | -2.70434100 | -2.81066400 | -2.98638700 |
| H  | -1.20672400 | -2.24563500 | -2.22367800 |
| H  | -1.50115500 | -3.98332700 | -2.42172300 |
| C  | -1.64742300 | -3.46819800 | 0.26862800  |
| H  | -0.82051200 | -2.76290100 | 0.28638000  |
| H  | -2.12154900 | -3.49428200 | 1.25672000  |
| H  | -1.23937600 | -4.46426300 | 0.06584600  |
| C  | -3.72804200 | -4.20258300 | -0.88054400 |
| H  | -4.23514700 | -4.34446300 | 0.08022000  |
| H  | -4.48587100 | -4.01016500 | -1.64706400 |
| H  | -3.23508400 | -5.14589200 | -1.13392000 |
| C  | 2.65288000  | -3.14692000 | 0.08082300  |
| C  | 3.65344800  | -4.31195800 | -0.01967400 |
| H  | 4.25917200  | -4.25313800 | -0.92980200 |
| H  | 4.32683400  | -4.35550200 | 0.84328300  |
| H  | 3.10014900  | -5.25545300 | -0.05341200 |
| C  | 1.83938600  | -3.34865900 | 1.37943700  |
| H  | 2.50597000  | -3.35865000 | 2.24926200  |
| H  | 1.10767300  | -2.55360100 | 1.51305300  |
| H  | 1.30846100  | -4.30618000 | 1.34802900  |
| C  | 1.73387600  | -3.21210400 | -1.16060000 |
| H  | 1.21015300  | -4.17413300 | -1.18658600 |
| H  | 0.99650800  | -2.41214700 | -1.16032800 |
| H  | 2.32823400  | -3.12322700 | -2.07545100 |
| C  | 6.98504900  | -0.47472400 | 0.07582300  |
| C  | 7.58199500  | 0.94092300  | 0.12192500  |
| H  | 7.25558200  | 1.54413200  | -0.73123500 |
| H  | 7.30493800  | 1.46634200  | 1.04184400  |
| H  | 8.67437300  | 0.88343000  | 0.08912800  |
| C  | 7.52543800  | -1.26822800 | 1.28543000  |
| H  | 7.16127100  | -2.29955300 | 1.28870800  |
| H  | 8.62032200  | -1.30107000 | 1.26323800  |
| H  | 7.21556600  | -0.80105600 | 2.22575100  |
| C  | 7.44759600  | -1.15359400 | -1.23194500 |
| H  | 7.08359600  | -2.18239300 | -1.30424800 |
| H  | 7.07667100  | -0.60657300 | -2.10409500 |
| H  | 8.54177000  | -1.18170700 | -1.28212400 |
| C  | -6.82838500 | -0.33292700 | 0.21034800  |
| C  | -7.36485600 | 1.09054200  | 0.42998300  |
| H  | -6.88695700 | 1.57351600  | 1.28857300  |
| H  | -7.20829400 | 1.72133100  | -0.45100700 |
| H  | -8.44113500 | 1.05524300  | 0.62492100  |
| C  | -7.12830500 | -1.16460500 | 1.47671700  |
| H  | -8.20468600 | -1.17950700 | 1.68050900  |
| H  | -6.79466400 | -2.20059400 | 1.36818900  |
| H  | -6.62034700 | -0.73922800 | 2.34837200  |
| C  | -7.56938000 | -0.94964200 | -0.99604700 |
| H  | -7.25705200 | -1.98155300 | -1.17961500 |
| H  | -8.65061500 | -0.95491900 | -0.81924300 |
| H  | -7.37299700 | -0.37437700 | -1.90615100 |
| H  | 0.20719200  | 3.39226000  | 1.34377800  |
| H  | -0.02067600 | 3.33922700  | -1.67894400 |
| Cl | 0.86100300  | 0.81786200  | -2.56993900 |

**PO-aCo<sup>III</sup>-Cl**

Charge: 0

Spin Multiplicity: 5

Sum of electronic and thermal Free Energies (a.u.): -2461.143048

No imaginary frequency

|   |             |             |             |
|---|-------------|-------------|-------------|
| C | -4.83223800 | -1.49387000 | -0.18951200 |
| C | -5.42661700 | -0.23715300 | 0.07514200  |
| C | -3.49262900 | -1.67900600 | -0.49828500 |
| H | -5.47243200 | -2.36589300 | -0.15511100 |
| C | -4.61098200 | 0.87534700  | -0.01876700 |
| C | -2.64795500 | -0.52161200 | -0.50255800 |
| C | -3.23434700 | 0.76343300  | -0.30675200 |
| H | -5.01326700 | 1.87118700  | 0.13423700  |
| O | -1.36348600 | -0.66508400 | -0.68342800 |

|    |             |             |             |
|----|-------------|-------------|-------------|
| C  | -2.47867700 | 1.98570800  | -0.43473700 |
| Co | 0.11112600  | 0.47016100  | -0.48058100 |
| N  | -1.20640200 | 2.06955100  | -0.61689400 |
| H  | -3.07799400 | 2.89885900  | -0.38584100 |
| N  | 1.30677300  | 2.03075500  | 0.20843400  |
| C  | -0.49611800 | 3.33767500  | -0.74500200 |
| C  | 2.58674200  | 1.90706000  | 0.33440900  |
| C  | 0.62310900  | 3.32125100  | 0.32596800  |
| C  | -1.33232200 | 4.61446600  | -0.65216400 |
| H  | 3.19306200  | 2.79969100  | 0.50630400  |
| C  | 3.33875800  | 0.68198200  | 0.25860300  |
| C  | 1.50430300  | 4.56998700  | 0.22157300  |
| C  | -0.43760400 | 5.85326900  | -0.78155400 |
| H  | -1.85513000 | 4.64495000  | 0.31380400  |
| H  | -2.09835600 | 4.61631100  | -1.43537800 |
| C  | 4.74755600  | 0.78412900  | 0.28470100  |
| C  | 2.71343700  | -0.59798800 | 0.19446400  |
| C  | 0.66033600  | 5.84993500  | 0.28654000  |
| H  | 2.24574900  | 4.58192700  | 1.02765300  |
| H  | 2.05663500  | 4.53623200  | -0.72670500 |
| H  | -1.04400900 | 6.76185800  | -0.70279200 |
| H  | 0.02240300  | 5.86576800  | -1.77832100 |
| C  | 5.55556600  | -0.33391000 | 0.22059000  |
| H  | 5.17954600  | 1.77748500  | 0.34476300  |
| C  | 3.53404600  | -1.76816200 | 0.12872600  |
| O  | 1.40887800  | -0.71019800 | 0.22981500  |
| H  | 0.19865200  | 5.92927000  | 1.28021700  |
| H  | 1.30922000  | 6.72475700  | 0.17223200  |
| C  | 4.90909100  | -1.59045600 | 0.14059100  |
| H  | 5.53631600  | -2.47062800 | 0.08109400  |
| C  | -1.00842000 | -0.64785800 | 2.42232600  |
| C  | 0.12920800  | 0.15193300  | 2.89213800  |
| O  | -0.68636400 | 0.61768200  | 1.79608500  |
| H  | -0.77446500 | -1.49166100 | 1.78047700  |
| H  | 1.13557000  | -0.13666900 | 2.60328600  |
| H  | 0.03113700  | 0.74436300  | 3.80014800  |
| C  | -2.33441400 | -0.70164200 | 3.12789000  |
| H  | -3.14610900 | -0.77487800 | 2.39785400  |
| H  | -2.38105100 | -1.58145400 | 3.77853700  |
| H  | -2.49019800 | 0.19373000  | 3.73631000  |
| C  | -2.91673000 | -3.06032200 | -0.85066200 |
| C  | -2.32573000 | -3.01282800 | -2.27953200 |
| H  | -3.10452600 | -2.76749800 | -3.00918500 |
| H  | -1.53103800 | -2.27002600 | -2.35683000 |
| H  | -1.91111200 | -3.99230900 | -2.54258700 |
| C  | -1.81003400 | -3.47174200 | 0.14643100  |
| H  | -0.95592300 | -2.79951400 | 0.08382500  |
| H  | -2.19156800 | -3.47416700 | 1.17384700  |
| H  | -1.46152800 | -4.48450500 | -0.08342900 |
| C  | -4.00043500 | -4.15229800 | -0.82139500 |
| H  | -4.43660700 | -4.27279100 | 0.17633400  |
| H  | -4.80938400 | -3.94541300 | -1.52956200 |
| H  | -3.55283300 | -5.11002700 | -1.10295400 |
| C  | 2.88918700  | -3.15884600 | 0.02694600  |
| C  | 3.94401400  | -4.27580200 | -0.05922300 |
| H  | 4.58035000  | -4.16917800 | -0.94377900 |
| H  | 4.58613100  | -4.30572800 | 0.82774700  |
| H  | 3.43767600  | -5.24309500 | -0.13270800 |
| C  | 2.02596300  | -3.42864400 | 1.28062500  |
| H  | 2.64366600  | -3.41096600 | 2.18551600  |
| H  | 1.23951900  | -2.68199500 | 1.38215500  |
| H  | 1.55849700  | -4.41694100 | 1.20827100  |
| C  | 2.01505900  | -3.23774800 | -1.24632600 |
| H  | 1.54611600  | -4.22609700 | -1.31369600 |
| H  | 1.23267700  | -2.48054200 | -1.24695500 |
| H  | 2.62779900  | -3.08914000 | -2.14090000 |
| C  | 7.08709700  | -0.27380100 | 0.22513700  |
| C  | 7.60762600  | 1.16948200  | 0.31861900  |
| H  | 7.27756800  | 1.77331700  | -0.53270600 |

|    |             |             |             |
|----|-------------|-------------|-------------|
| H  | 7.27455200  | 1.66036600  | 1.23897300  |
| H  | 8.70202600  | 1.16878000  | 0.32051800  |
| C  | 7.62927500  | -1.06330500 | 1.43665500  |
| H  | 7.32006600  | -2.11202400 | 1.40769100  |
| H  | 8.72454900  | -1.03842600 | 1.45093000  |
| H  | 7.26437500  | -0.63286300 | 2.37473700  |
| C  | 7.62792600  | -0.89976700 | -1.07905500 |
| H  | 7.32145600  | -1.94440500 | -1.18384900 |
| H  | 7.25761900  | -0.35438200 | -1.95255200 |
| H  | 8.72313200  | -0.86964100 | -1.09265300 |
| C  | -6.91642800 | -0.16753800 | 0.42762000  |
| C  | -7.38428800 | 1.27562600  | 0.67468700  |
| H  | -6.84023100 | 1.74010300  | 1.50351800  |
| H  | -7.25480000 | 1.90028300  | -0.21497600 |
| H  | -8.44814700 | 1.28106400  | 0.93113100  |
| C  | -7.17254700 | -0.98615500 | 1.71214600  |
| H  | -8.23420200 | -0.95623000 | 1.98105700  |
| H  | -6.88934400 | -2.03504900 | 1.58600800  |
| H  | -6.59518500 | -0.58220800 | 2.55006700  |
| C  | -7.75121700 | -0.75589800 | -0.73079500 |
| H  | -7.49073200 | -1.79940000 | -0.92917500 |
| H  | -8.81935200 | -0.71858200 | -0.48997200 |
| H  | -7.58726100 | -0.18955800 | -1.65285000 |
| H  | 0.11805500  | 3.31746400  | 1.30355000  |
| H  | -0.00055100 | 3.29688900  | -1.72469200 |
| Cl | 0.90803400  | 0.58964400  | -2.64616100 |

**(salen)aCo<sup>III</sup>-OAc**

Charge: 0

Spin Multiplicity: 1

Sum of electronic and thermal Free Energies (a.u.): -2036.298120

No imaginary frequency

|    |             |             |             |
|----|-------------|-------------|-------------|
| C  | 4.79727700  | -1.62570000 | -0.07356100 |
| C  | 5.49890100  | -0.39412000 | -0.07142800 |
| C  | 3.41910800  | -1.75683100 | -0.05137500 |
| H  | 5.38964800  | -2.53101500 | -0.09288900 |
| C  | 4.73511400  | 0.75041000  | -0.06616000 |
| C  | 2.62873300  | -0.55392200 | -0.01771900 |
| C  | 3.31906300  | 0.69681700  | -0.05412800 |
| H  | 5.19984100  | 1.73070700  | -0.07658900 |
| O  | 1.32444700  | -0.63798600 | 0.02099900  |
| C  | 2.62375700  | 1.94088200  | -0.09393800 |
| Co | 0.04276800  | 0.72165300  | -0.09348600 |
| N  | 1.33999300  | 2.09971200  | -0.16992000 |
| H  | 3.25043500  | 2.83286500  | -0.06951700 |
| N  | -1.19962100 | 2.05724700  | -0.62554000 |
| C  | 0.69426900  | 3.41371100  | -0.04596800 |
| C  | -2.48297700 | 1.92006700  | -0.52030600 |
| C  | -0.55631700 | 3.34442900  | -0.93403900 |
| C  | 1.54150700  | 4.64177600  | -0.37530400 |
| H  | -3.11254000 | 2.80145700  | -0.64286300 |
| C  | -3.17619300 | 0.68823500  | -0.31154100 |
| C  | -1.41329800 | 4.60090200  | -0.78373500 |
| C  | 0.69104200  | 5.91417000  | -0.23885700 |
| H  | 1.93252900  | 4.55608800  | -1.39836200 |
| H  | 2.40166500  | 4.70727900  | 0.29843700  |
| C  | -4.58154900 | 0.74253400  | -0.15464100 |
| C  | -2.49344200 | -0.56361700 | -0.39315000 |
| C  | -0.57380500 | 5.84737300  | -1.10214600 |
| H  | -2.27878400 | 4.56157400  | -1.45349700 |
| H  | -1.79468300 | 4.65521700  | 0.24406000  |
| H  | 1.28967400  | 6.79003800  | -0.50969000 |
| H  | 0.40537800  | 6.04032600  | 0.81345800  |
| C  | -5.34081400 | -0.40570200 | -0.09817400 |
| H  | -5.04292700 | 1.72143300  | -0.07965300 |
| C  | -3.28653100 | -1.76068700 | -0.45715900 |
| O  | -1.18920900 | -0.63907500 | -0.44157500 |
| H  | -0.28961500 | 5.82805400  | -2.16289700 |
| H  | -1.18061500 | 6.74707700  | -0.95712500 |



|   |             |             |             |
|---|-------------|-------------|-------------|
| C | -4.65518800 | -1.63262200 | -0.28063500 |
| H | -5.25218100 | -2.53505300 | -0.29088300 |
| O | -0.23630900 | 1.25655700  | 1.65045300  |
| C | -0.69003000 | 0.60590300  | 2.71459200  |
| O | -0.87927300 | 1.23756100  | 3.74306500  |
| C | -0.96468600 | -0.87690400 | 2.61845700  |
| H | -0.95455500 | -1.30141300 | 3.62292400  |
| H | -1.95445000 | -1.03793000 | 2.18250300  |
| H | -0.23916100 | -1.37460000 | 1.97974300  |
| H | -0.21046500 | 3.27803400  | -1.97746400 |
| H | 0.35018900  | 3.46975000  | 0.99545500  |
| C | -2.63938400 | -3.12170700 | -0.76131700 |
| C | -1.61190300 | -3.50310600 | 0.32385300  |
| H | -0.80566900 | -2.77672500 | 0.36745300  |
| H | -2.08793600 | -3.55965300 | 1.30832900  |
| H | -1.18246800 | -4.48559600 | 0.09892900  |
| C | -1.93731700 | -3.03875200 | -2.13673100 |
| H | -2.66447300 | -2.82132800 | -2.92659200 |
| H | -1.17349200 | -2.26101100 | -2.14161000 |
| H | -1.45646800 | -3.99479200 | -2.37076900 |
| C | -3.68203400 | -4.25110600 | -0.83610800 |
| H | -4.19904800 | -4.39630500 | 0.11838800  |
| H | -4.43245100 | -4.06995300 | -1.61275600 |
| H | -3.17459900 | -5.18919000 | -1.08031700 |
| C | -6.85795600 | -0.41323600 | 0.11496200  |
| C | -7.42100100 | 1.00655100  | 0.28727600  |
| H | -6.97698200 | 1.51428600  | 1.14945000  |
| H | -7.24718200 | 1.62120200  | -0.60208900 |
| H | -8.50212600 | 0.95886800  | 0.44977600  |
| C | -7.18748200 | -1.22361500 | 1.38767300  |
| H | -8.26976000 | -1.24846300 | 1.55593800  |
| H | -6.83786500 | -2.25718700 | 1.31051700  |
| H | -6.71347300 | -0.77508900 | 2.26623600  |
| C | -7.54944000 | -1.06505100 | -1.10241500 |
| H | -7.21771000 | -2.09620400 | -1.25398500 |
| H | -8.63566200 | -1.08212000 | -0.96097300 |
| H | -7.33163300 | -0.50555600 | -2.01771000 |
| C | 2.75011800  | -3.13992900 | -0.05786800 |
| C | 1.98861400  | -3.34228700 | 1.26967700  |
| H | 2.68438300  | -3.33001900 | 2.11530000  |
| H | 1.25222400  | -2.55623400 | 1.42047400  |
| H | 1.46964100  | -4.30687500 | 1.26780200  |
| C | 3.77567900  | -4.28110400 | -0.18247700 |
| H | 4.35705000  | -4.21142900 | -1.10801200 |
| H | 4.47123700  | -4.30689800 | 0.66284700  |
| H | 3.24388700  | -5.23729700 | -0.19725900 |
| C | 1.78405500  | -3.25417700 | -1.25878800 |
| H | 1.00427400  | -2.49687900 | -1.21384200 |
| H | 2.33201600  | -3.13884200 | -2.20062400 |
| H | 1.30982800  | -4.24160600 | -1.26319700 |
| C | 7.60857200  | 1.02708100  | -0.07718500 |
| H | 7.29606500  | 1.59254700  | -0.96117500 |
| H | 7.30177200  | 1.58377800  | 0.81417600  |
| H | 8.70204100  | 0.98353400  | -0.08124800 |
| C | 7.03089300  | -0.39722200 | -0.08196400 |
| C | 7.55037700  | -1.13528800 | 1.17120900  |
| H | 7.19919100  | -2.17054700 | 1.20583500  |
| H | 8.64579900  | -1.15390200 | 1.17794200  |
| H | 7.20974000  | -0.63631300 | 2.08381300  |
| C | 7.53539600  | -1.12099800 | -1.34947400 |
| H | 8.63065100  | -1.13920400 | -1.36952500 |
| H | 7.18432600  | -2.15600800 | -1.39188000 |
| H | 7.18413100  | -0.61161600 | -2.25242800 |

(salen)Co<sup>III</sup>-OAc

Charge: 0

Spin Multiplicity: 3

Sum of electronic and thermal Free Energies (a.u.): -2036.315681

No imaginary frequency

|    |             |             |             |
|----|-------------|-------------|-------------|
| C  | 4.87004100  | -1.61951900 | 0.04515700  |
| C  | 5.54754100  | -0.37472200 | -0.03437400 |
| C  | 3.49587900  | -1.77511700 | 0.07354400  |
| H  | 5.47981200  | -2.51229100 | 0.09310500  |
| C  | 4.76501500  | 0.75547900  | -0.07760100 |
| C  | 2.68587200  | -0.58760700 | 0.00735600  |
| C  | 3.34910700  | 0.67495300  | -0.05814200 |
| H  | 5.21179500  | 1.74272200  | -0.12728100 |
| O  | 1.38566000  | -0.69658900 | 0.01194500  |
| C  | 2.61985600  | 1.89573600  | -0.09043800 |
| Co | 0.06815200  | 0.61599200  | -0.15550600 |
| N  | 1.32695800  | 2.02865500  | -0.11254100 |
| H  | 3.22087000  | 2.80470800  | -0.08852400 |
| N  | -1.16116600 | 1.96107800  | -0.72783200 |
| C  | 0.66465800  | 3.34194200  | -0.03997300 |
| C  | -2.44320400 | 1.79635400  | -0.70374300 |
| C  | -0.52383100 | 3.25615100  | -1.00604600 |
| C  | 1.51861700  | 4.57577100  | -0.31630000 |
| H  | -3.08231200 | 2.66284000  | -0.86603000 |
| C  | -3.10831400 | 0.54981200  | -0.49328500 |
| C  | -1.41141600 | 4.49358000  | -0.88171200 |
| C  | 0.64152000  | 5.83416600  | -0.21138300 |
| H  | 1.96628400  | 4.50940700  | -1.31816400 |
| H  | 2.33989400  | 4.64641200  | 0.40477500  |
| C  | -4.51179900 | 0.57306100  | -0.32352400 |
| C  | -2.39494800 | -0.68382700 | -0.56055000 |
| C  | -0.57689800 | 5.75755500  | -1.13877300 |
| H  | -2.23871400 | 4.45232700  | -1.59854400 |
| H  | -1.83718300 | 4.50923800  | 0.12812800  |
| H  | 1.23932200  | 6.72199400  | -0.44307100 |
| H  | 0.30012600  | 5.94175500  | 0.82568300  |
| C  | -5.23761200 | -0.59257100 | -0.20231100 |
| H  | -4.99742200 | 1.54165000  | -0.27781300 |
| C  | -3.14699600 | -1.90350800 | -0.49701400 |
| O  | -1.09129400 | -0.72742200 | -0.70752300 |
| H  | -0.23852200 | 5.76072000  | -2.18404600 |
| H  | -1.20524300 | 6.64515300  | -1.01097100 |
| C  | -4.51659500 | -1.80701000 | -0.30595900 |
| H  | -5.08060300 | -2.72697700 | -0.22486700 |
| O  | -0.60763500 | 0.57897000  | 1.71277700  |
| C  | -1.34738500 | 1.45565300  | 2.32180400  |
| O  | -1.38554000 | 2.67296900  | 2.09536400  |
| C  | -2.25742800 | 0.83993800  | 3.37903800  |
| H  | -2.71303000 | 1.61725900  | 3.99437100  |
| H  | -3.04350000 | 0.27043300  | 2.87086700  |
| H  | -1.69865300 | 0.13745400  | 4.00249500  |
| H  | -0.12326100 | 3.19716600  | -2.03012400 |
| H  | 0.22457000  | 3.39344700  | 0.96402400  |
| C  | 2.84103500  | -3.15674200 | 0.20497300  |
| C  | 1.91139200  | -3.41888800 | -1.00091500 |
| H  | 1.12585200  | -2.66949100 | -1.06643800 |
| H  | 2.48576900  | -3.40945000 | -1.93407200 |
| H  | 1.44326700  | -4.40433200 | -0.90321000 |
| C  | 3.88230600  | -4.28920900 | 0.24196700  |
| H  | 4.56061200  | -4.19893200 | 1.09697300  |
| H  | 3.36304900  | -5.24779000 | 0.33533600  |
| H  | 4.48177600  | -4.32654200 | -0.67404300 |
| C  | 2.04474200  | -3.20924300 | 1.52950400  |
| H  | 2.72220600  | -3.09394700 | 2.38252600  |
| H  | 1.29386500  | -2.42137500 | 1.57612000  |
| H  | 1.53952500  | -4.17627800 | 1.62587300  |
| C  | 7.07926500  | -0.35141000 | -0.05718400 |
| C  | 7.63162600  | 1.08030300  | -0.14322500 |
| H  | 7.29728100  | 1.58792100  | -1.05387600 |
| H  | 7.32739600  | 1.68291100  | 0.71871200  |
| H  | 8.72551000  | 1.05484900  | -0.16016700 |
| C  | 7.62217000  | -1.00390100 | 1.23305900  |
| H  | 7.29163700  | -2.04172700 | 1.33254900  |
| H  | 8.71772200  | -1.00143500 | 1.23097900  |

|   |             |             |             |
|---|-------------|-------------|-------------|
| H | 7.27924900  | -0.45772700 | 2.11737100  |
| C | 7.58538700  | -1.14129000 | -1.28393900 |
| H | 8.68057300  | -1.14308400 | -1.31242300 |
| H | 7.25084700  | -2.18237200 | -1.26163300 |
| H | 7.21878400  | -0.69217300 | -2.21238800 |
| C | -2.44214800 | -3.26255300 | -0.60076300 |
| C | -1.71097200 | -3.36398000 | -1.95874900 |
| H | -2.42939100 | -3.30721500 | -2.78403500 |
| H | -0.98183200 | -2.56341400 | -2.07677400 |
| H | -1.18729300 | -4.32336200 | -2.03074900 |
| C | -1.44083800 | -3.40831700 | 0.56567000  |
| H | -0.70564000 | -2.60710900 | 0.55735000  |
| H | -1.96763500 | -3.38456700 | 1.52560200  |
| H | -0.91496500 | -4.36627300 | 0.49040900  |
| C | -3.43274500 | -4.43732400 | -0.51966300 |
| H | -3.96441500 | -4.46195400 | 0.43737100  |
| H | -4.17254900 | -4.40971700 | -1.32694900 |
| H | -2.87937700 | -5.37686900 | -0.61100600 |
| C | -6.75130100 | -0.63034300 | 0.03087700  |
| C | -7.35730200 | 0.78026500  | 0.10449900  |
| H | -6.92749500 | 1.36181200  | 0.92631100  |
| H | -7.20402400 | 1.33487200  | -0.82702800 |
| H | -8.43600900 | 0.71114800  | 0.27520900  |
| C | -7.43349600 | -1.39240900 | -1.12606400 |
| H | -7.06842200 | -2.42031300 | -1.20602500 |
| H | -8.51690500 | -1.43460800 | -0.96920000 |
| H | -7.24472200 | -0.89503400 | -2.08269900 |
| C | -7.04165000 | -1.35332900 | 1.36444000  |
| H | -6.66209300 | -2.37912800 | 1.35941100  |
| H | -6.57084400 | -0.82678900 | 2.20054300  |
| H | -8.12064800 | -1.39666700 | 1.54928800  |

**(salen)aCo<sup>III</sup>-OAc**

Charge: 0

Spin Multiplicity: 5

Sum of electronic and thermal Free Energies (a.u.): -2036.311726

No imaginary frequency

|    |             |             |             |
|----|-------------|-------------|-------------|
| C  | 4.90002700  | -1.63021600 | -0.44825700 |
| C  | 5.58176800  | -0.39331100 | -0.33703800 |
| C  | 3.52175100  | -1.77141000 | -0.44118200 |
| H  | 5.50306300  | -2.52367700 | -0.54532500 |
| C  | 4.80710600  | 0.74315100  | -0.20608200 |
| C  | 2.73177900  | -0.58108200 | -0.30740100 |
| C  | 3.39742600  | 0.67604700  | -0.17606800 |
| H  | 5.26737900  | 1.72130700  | -0.11476600 |
| O  | 1.43078300  | -0.67253600 | -0.32473800 |
| C  | 2.67225400  | 1.91017100  | -0.04184000 |
| Co | 0.04830100  | 0.46516300  | 0.29109500  |
| N  | 1.39226900  | 2.01629500  | 0.09330900  |
| H  | 3.28688800  | 2.81453300  | -0.05588400 |
| N  | -1.11661500 | 1.89818600  | -0.63632300 |
| C  | 0.69214000  | 3.29689700  | 0.15956500  |
| C  | -2.38769600 | 1.75108300  | -0.84763500 |
| C  | -0.45290200 | 3.19177400  | -0.87317900 |
| C  | 1.52331600  | 4.56063500  | -0.05227500 |
| H  | -2.96097300 | 2.61180900  | -1.19775800 |
| C  | -3.17212900 | 0.56704800  | -0.64921800 |
| C  | -1.34698900 | 4.43478100  | -0.81378000 |
| C  | 0.62401100  | 5.80133900  | 0.02150100  |
| H  | 2.01835400  | 4.52112300  | -1.03281000 |
| H  | 2.31190900  | 4.62438600  | 0.70586600  |
| C  | -4.56698400 | 0.66415300  | -0.86366200 |
| C  | -2.59391000 | -0.66970400 | -0.24022400 |
| C  | -0.51874300 | 5.71474500  | -0.99517100 |
| H  | -2.11668100 | 4.39657000  | -1.59137900 |
| H  | -1.86069200 | 4.44793800  | 0.15573700  |
| H  | 1.21857400  | 6.70513600  | -0.14926100 |
| H  | 0.20603300  | 5.88286200  | 1.03316500  |
| C  | -5.40570400 | -0.41246500 | -0.65861500 |

|   |             |             |             |
|---|-------------|-------------|-------------|
| H | -4.96155900 | 1.62119200  | -1.18823700 |
| C | -3.45237900 | -1.78914300 | 0.00838700  |
| O | -1.30300000 | -0.79620400 | -0.10343700 |
| H | -0.10093000 | 5.73350200  | -2.01108300 |
| H | -1.17232200 | 6.58938300  | -0.91010200 |
| C | -4.80946600 | -1.61835000 | -0.21281700 |
| H | -5.46479500 | -2.46060000 | -0.03028300 |
| O | 0.08220500  | 0.26085700  | 2.18223100  |
| C | -0.67614400 | 1.05606000  | 2.90310100  |
| O | -1.21689500 | 2.07439400  | 2.47090700  |
| C | -0.84443000 | 0.59149400  | 4.33726000  |
| H | -1.39387300 | 1.33509700  | 4.91521000  |
| H | -1.38912000 | -0.35802900 | 4.34271000  |
| H | 0.13377000  | 0.40492000  | 4.78911100  |
| H | 0.01668100  | 3.13446600  | -1.86775100 |
| H | 0.21419700  | 3.32651300  | 1.14707500  |
| C | 2.83816000  | -3.14196900 | -0.56396700 |
| C | 1.95206200  | -3.17550200 | -1.83086500 |
| H | 1.17751700  | -2.41022100 | -1.78987500 |
| H | 2.55874400  | -3.01426400 | -2.72881600 |
| H | 1.46910900  | -4.15484900 | -1.91994100 |
| C | 3.86398400  | -4.28316400 | -0.67947700 |
| H | 4.51226200  | -4.34318700 | 0.20122400  |
| H | 3.33238200  | -5.23579400 | -0.76260900 |
| H | 4.49589500  | -4.18003300 | -1.56813000 |
| C | 1.97298100  | -3.41255000 | 0.68964500  |
| H | 2.59289300  | -3.40767400 | 1.59268400  |
| H | 1.18902300  | -2.66520900 | 0.80269700  |
| H | 1.50140700  | -4.39807100 | 0.60739500  |
| C | 7.11383400  | -0.37435600 | -0.36233400 |
| C | 7.67612200  | 1.05059300  | -0.23565900 |
| H | 7.34406700  | 1.69076400  | -1.05943500 |
| H | 7.37830200  | 1.52023200  | 0.70732500  |
| H | 8.76973100  | 1.01997300  | -0.25975900 |
| C | 7.65578700  | -1.21558600 | 0.81423000  |
| H | 7.31871300  | -2.25449900 | 0.75849200  |
| H | 8.75133000  | -1.21883200 | 0.80853000  |
| H | 7.31871700  | -0.80562400 | 1.77142200  |
| C | 7.61223600  | -0.97511100 | -1.69511000 |
| H | 8.70729400  | -0.97635800 | -1.72744500 |
| H | 7.27360900  | -2.00667300 | -1.82659900 |
| H | 7.24466200  | -0.39152100 | -2.54504300 |
| C | -2.86097600 | -3.10577100 | 0.53290600  |
| C | -1.84037400 | -3.67492300 | -0.47931600 |
| H | -2.32468500 | -3.87545900 | -1.44133700 |
| H | -1.01648300 | -2.98196300 | -0.64172800 |
| H | -1.43196700 | -4.61966400 | -0.10293900 |
| C | -2.16819800 | -2.84876700 | 1.89301900  |
| H | -1.37651700 | -2.10404400 | 1.80885600  |
| H | -2.89821800 | -2.49787200 | 2.63120900  |
| H | -1.72941500 | -3.77990100 | 2.26887000  |
| C | -3.94721500 | -4.17255600 | 0.75423300  |
| H | -4.69390900 | -3.85228800 | 1.48861700  |
| H | -4.46533400 | -4.42902800 | -0.17607400 |
| H | -3.48150100 | -5.08660400 | 1.13498800  |
| C | -6.92245400 | -0.35734600 | -0.87267400 |
| C | -7.38643100 | 1.02515000  | -1.35865500 |
| H | -7.15218100 | 1.80864500  | -0.63081200 |
| H | -6.92393900 | 1.29324300  | -2.31414000 |
| H | -8.47109300 | 1.02152000  | -1.50428800 |
| C | -7.32952900 | -1.40454000 | -1.93226800 |
| H | -7.05558300 | -2.41811800 | -1.62588000 |
| H | -8.41318500 | -1.38549500 | -2.09288800 |
| H | -6.83730500 | -1.20004600 | -2.88830900 |
| C | -7.64099200 | -0.66851400 | 0.45852500  |
| H | -7.37934600 | -1.66056400 | 0.83746000  |
| H | -7.37005700 | 0.06417600  | 1.22513000  |
| H | -8.72785600 | -0.63870100 | 0.32310000  |

**H<sub>2</sub>O-aCo<sup>III</sup>-OAc**

Charge: 0

Spin Multiplicity: 1

Sum of electronic and thermal Free Energies (a.u.): -2112.732725

No imaginary frequency

|    |             |             |             |
|----|-------------|-------------|-------------|
| C  | 4.79952100  | -1.61866800 | 0.01744100  |
| C  | 5.49161200  | -0.38488000 | 0.04680700  |
| C  | 3.42088300  | -1.75712800 | 0.06524600  |
| H  | 5.39562200  | -2.51920700 | -0.05277600 |
| C  | 4.71703100  | 0.75373900  | 0.09791100  |
| C  | 2.62293900  | -0.56401300 | 0.16990800  |
| C  | 3.30353600  | 0.69226700  | 0.13677100  |
| H  | 5.17553600  | 1.73714300  | 0.10130400  |
| O  | 1.32056200  | -0.66460000 | 0.27643500  |
| C  | 2.60245500  | 1.94329900  | 0.14116800  |
| Co | 0.06086700  | 0.69668800  | -0.13674800 |
| N  | 1.32867000  | 2.10011400  | 0.01861700  |
| H  | 3.22563400  | 2.83327400  | 0.23781000  |
| N  | -1.17320900 | 2.04718400  | -0.66851300 |
| C  | 0.65250200  | 3.39827400  | 0.10419900  |
| C  | -2.45067500 | 1.91334100  | -0.55071200 |
| C  | -0.50362300 | 3.32846700  | -0.91315900 |
| C  | 1.51732000  | 4.63741400  | -0.12049600 |
| H  | -3.07799800 | 2.79921600  | -0.65418300 |
| C  | -3.15520800 | 0.68171200  | -0.33174200 |
| C  | -1.37316800 | 4.58301100  | -0.84877900 |
| C  | 0.64834000  | 5.90303200  | -0.07175200 |
| H  | 2.01816400  | 4.56310100  | -1.09556400 |
| H  | 2.29859300  | 4.70131800  | 0.64386700  |
| C  | -4.55119100 | 0.76693600  | -0.12781800 |
| C  | -2.50515700 | -0.58400300 | -0.42554900 |
| C  | -0.51013200 | 5.83324000  | -1.07335300 |
| H  | -2.16733200 | 4.53773500  | -1.60196900 |
| H  | -1.85598800 | 4.63728900  | 0.13553500  |
| H  | 1.26774900  | 6.78447100  | -0.26762600 |
| H  | 0.24413300  | 6.02015600  | 0.94205000  |
| C  | -5.33523600 | -0.36341000 | -0.02669600 |
| H  | -4.98867400 | 1.75638600  | -0.04782000 |
| C  | -3.32195600 | -1.76247900 | -0.43662900 |
| O  | -1.19863500 | -0.68682500 | -0.54190900 |
| H  | -0.10810900 | 5.81599500  | -2.09531800 |
| H  | -1.13320600 | 6.73030500  | -0.99669200 |
| C  | -4.68358900 | -1.60388200 | -0.21350200 |
| H  | -5.29828600 | -2.49386100 | -0.18645000 |
| O  | -0.42448500 | 1.17137600  | 1.59911600  |
| C  | -0.80112500 | 0.50519600  | 2.67653800  |
| O  | -1.03210100 | 1.11703000  | 3.71051600  |
| C  | -0.97420700 | -0.99468700 | 2.58396400  |
| H  | -0.92028900 | -1.42327900 | 3.58557200  |
| H  | -1.95971300 | -1.21586100 | 2.16413500  |
| H  | -0.22726700 | -1.43577400 | 1.92924000  |
| H  | -0.05172000 | 3.25597700  | -1.91331500 |
| H  | 0.20141800  | 3.42901300  | 1.10384800  |
| O  | 0.55234200  | 0.33630800  | -2.11552900 |
| H  | -0.19280000 | -0.29546400 | -2.17570300 |
| H  | 1.34046000  | -0.22495200 | -2.03831800 |
| C  | 2.75530900  | -3.14117800 | -0.00599400 |
| C  | 1.75944700  | -3.18394100 | -1.18885900 |
| H  | 0.95574700  | -2.46294900 | -1.05120600 |
| H  | 2.27864000  | -2.97605900 | -2.13264000 |
| H  | 1.31044500  | -4.17950400 | -1.26853100 |
| C  | 3.78053900  | -4.26677200 | -0.23301700 |
| H  | 4.49725800  | -4.34317200 | 0.59090500  |
| H  | 3.25289800  | -5.22328600 | -0.29631100 |
| H  | 4.33873800  | -4.13293000 | -1.16583400 |
| C  | 2.02266900  | -3.43665900 | 1.32006800  |
| H  | 2.73768300  | -3.47857900 | 2.14828600  |
| H  | 1.28683100  | -2.66709700 | 1.54236600  |
| H  | 1.50879200  | -4.40261800 | 1.26356700  |

|   |             |             |             |
|---|-------------|-------------|-------------|
| C | 7.02344100  | -0.37354000 | 0.00621100  |
| C | 7.58899200  | 1.05502000  | 0.05012700  |
| H | 7.25734800  | 1.64761700  | -0.80880700 |
| H | 7.29196000  | 1.57823000  | 0.96474700  |
| H | 8.68259900  | 1.02170200  | 0.02683500  |
| C | 7.57381000  | -1.14981200 | 1.22247800  |
| H | 7.23180500  | -2.18875300 | 1.22742800  |
| H | 8.66932100  | -1.15882800 | 1.20800000  |
| H | 7.24637100  | -0.68622200 | 2.15824200  |
| C | 7.51045600  | -1.04780700 | -1.29492900 |
| H | 8.60525800  | -1.05549800 | -1.33658700 |
| H | 7.16746700  | -2.08399400 | -1.36687100 |
| H | 7.13790200  | -0.51034600 | -2.17285300 |
| C | -2.72076800 | -3.14809500 | -0.73718400 |
| C | -2.07118400 | -3.12208200 | -2.13988700 |
| H | -2.81026700 | -2.86316500 | -2.90542500 |
| H | -1.25717300 | -2.39819100 | -2.18103100 |
| H | -1.65897900 | -4.10751700 | -2.38271000 |
| C | -1.66304000 | -3.54113900 | 0.31401000  |
| H | -0.85168800 | -2.81935800 | 0.34238700  |
| H | -2.11016300 | -3.59979800 | 1.31117100  |
| H | -1.24727400 | -4.52576300 | 0.07184700  |
| C | -3.79457000 | -4.25125400 | -0.75136100 |
| H | -4.28345900 | -4.35847300 | 0.22237200  |
| H | -4.56515800 | -4.06903700 | -1.50770100 |
| H | -3.32003900 | -5.20865900 | -0.98684900 |
| C | -6.84354000 | -0.33230500 | 0.24253700  |
| C | -7.36699500 | 1.10293900  | 0.41205400  |
| H | -6.88000000 | 1.61307500  | 1.24918600  |
| H | -7.21163100 | 1.69959700  | -0.49290900 |
| H | -8.44230600 | 1.08342800  | 0.61439600  |
| C | -7.59510000 | -0.98636800 | -0.93731100 |
| H | -7.29243600 | -2.02718900 | -1.08411500 |
| H | -8.67548000 | -0.97637300 | -0.75572500 |
| H | -7.39919500 | -0.44637000 | -1.86919700 |
| C | -7.14415900 | -1.11431500 | 1.53975900  |
| H | -6.82223100 | -2.15716900 | 1.46624600  |
| H | -6.62610300 | -0.66419100 | 2.39215300  |
| H | -8.21958300 | -1.11035000 | 1.74919700  |

**H<sub>2</sub>O-aCo<sup>III</sup>-OAc**

Charge: 0

Spin Multiplicity: 3

Sum of electronic and thermal Free Energies (a.u.): -2112.740367

No imaginary frequency

|    |             |             |             |
|----|-------------|-------------|-------------|
| C  | 4.86613200  | -1.60092600 | 0.13142900  |
| C  | 5.53166400  | -0.34998000 | 0.08599900  |
| C  | 3.49221600  | -1.76601700 | 0.16923400  |
| H  | 5.48232900  | -2.49056600 | 0.13981900  |
| C  | 4.73766500  | 0.77477800  | 0.08016600  |
| C  | 2.67181100  | -0.58471200 | 0.15247500  |
| C  | 3.32385600  | 0.68458000  | 0.10502500  |
| H  | 5.17682700  | 1.76624100  | 0.05235200  |
| O  | 1.37062900  | -0.70760200 | 0.18157100  |
| C  | 2.58835500  | 1.90825600  | 0.11039900  |
| Co | 0.07261400  | 0.60660900  | -0.14884200 |
| N  | 1.30042600  | 2.03482500  | 0.05957300  |
| H  | 3.18704000  | 2.81721600  | 0.16769500  |
| N  | -1.15022900 | 1.96536600  | -0.71453600 |
| C  | 0.61438400  | 3.33255800  | 0.13090500  |
| C  | -2.42899600 | 1.79806400  | -0.73544000 |
| C  | -0.49723700 | 3.26276900  | -0.92846600 |
| C  | 1.47295200  | 4.58177200  | -0.04013800 |
| H  | -3.06497500 | 2.66557200  | -0.90559600 |
| C  | -3.10251400 | 0.54848700  | -0.53929900 |
| C  | -1.39735200 | 4.49466400  | -0.85017600 |
| C  | 0.57847400  | 5.82976000  | 0.02438400  |
| H  | 1.99990800  | 4.54700200  | -1.00428200 |
| H  | 2.23289500  | 4.63616800  | 0.74695000  |

|   |             |             |             |
|---|-------------|-------------|-------------|
| C | -4.50073400 | 0.58695700  | -0.34498100 |
| C | -2.40104400 | -0.69037300 | -0.59229400 |
| C | -0.55323700 | 5.76841200  | -1.00796900 |
| H | -2.16393300 | 4.46413300  | -1.63234200 |
| H | -1.90424600 | 4.48944000  | 0.12196200  |
| H | 1.18521000  | 6.72825000  | -0.13039200 |
| H | 0.14695400  | 5.90582900  | 1.03023400  |
| C | -5.23273300 | -0.57003400 | -0.17213600 |
| H | -4.97832900 | 1.55996200  | -0.31205900 |
| C | -3.15338000 | -1.89940700 | -0.45544500 |
| O | -1.09752500 | -0.73869800 | -0.78958600 |
| H | -0.12494400 | 5.79574200  | -2.01926300 |
| H | -1.19686400 | 6.64957800  | -0.91649700 |
| C | -4.52087000 | -1.78962500 | -0.24232700 |
| H | -5.08646200 | -2.70268000 | -0.11044800 |
| O | -0.73823300 | 0.46544100  | 1.68265700  |
| C | -1.52388800 | 1.30724100  | 2.27802700  |
| O | -1.54477300 | 2.53718800  | 2.11904800  |
| C | -2.51943400 | 0.63902000  | 3.22160200  |
| H | -3.03460800 | 1.38367600  | 3.83045900  |
| H | -3.25230900 | 0.08869300  | 2.62104900  |
| H | -2.01028600 | -0.08809500 | 3.85948000  |
| H | -0.01948100 | 3.21254900  | -1.91766400 |
| H | 0.09862900  | 3.34038800  | 1.10017500  |
| O | 0.77602800  | 0.24360800  | -2.50000400 |
| H | -0.00315700 | -0.33389300 | -2.41788600 |
| H | 1.51643100  | -0.34317200 | -2.29191100 |
| C | 2.84635800  | -3.15650200 | 0.24340000  |
| C | 1.90428800  | -3.36497200 | -0.96444300 |
| H | 1.10222600  | -2.62982200 | -0.97123500 |
| H | 2.46617700  | -3.29352200 | -1.90341100 |
| H | 1.45225600  | -4.36142300 | -0.92075200 |
| C | 3.89363700  | -4.28345500 | 0.21133400  |
| H | 4.58127100  | -4.23060000 | 1.06176300  |
| H | 3.38119600  | -5.24876500 | 0.26388600  |
| H | 4.48298800  | -4.27190300 | -0.71194500 |
| C | 2.06351300  | -3.27954700 | 1.57080600  |
| H | 2.74919500  | -3.19951900 | 2.42111400  |
| H | 1.30718500  | -2.50098800 | 1.66166700  |
| H | 1.56747800  | -4.25460700 | 1.62593200  |
| C | 7.06303100  | -0.31101400 | 0.05112300  |
| C | 7.60112800  | 1.12802600  | 0.00609600  |
| H | 7.25603500  | 1.66058700  | -0.88610500 |
| H | 7.29706600  | 1.70053300  | 0.88834000  |
| H | 8.69504800  | 1.11366900  | -0.01873500 |
| C | 7.62265800  | -0.99873300 | 1.31561200  |
| H | 7.30224800  | -2.04221100 | 1.38480700  |
| H | 8.71806900  | -0.98602900 | 1.30484300  |
| H | 7.28216000  | -0.48403800 | 2.21950300  |
| C | 7.56670000  | -1.05663000 | -1.20401000 |
| H | 8.66153000  | -1.04607900 | -1.24168700 |
| H | 7.24328200  | -2.10147500 | -1.21168100 |
| H | 7.18783000  | -0.58231700 | -2.11488900 |
| C | -2.45486900 | -3.26579600 | -0.49469600 |
| C | -1.75509700 | -3.45899300 | -1.85864000 |
| H | -2.48764400 | -3.43602500 | -2.67288000 |
| H | -1.01390400 | -2.68121200 | -2.03658600 |
| H | -1.24746000 | -4.42925200 | -1.88610600 |
| C | -1.42892900 | -3.34256500 | 0.65695500  |
| H | -0.69946200 | -2.53848400 | 0.59350100  |
| H | -1.93704600 | -3.26737200 | 1.62394500  |
| H | -0.90002000 | -4.30139100 | 0.62453400  |
| C | -3.44583300 | -4.43015900 | -0.31948300 |
| H | -3.95903100 | -4.39011400 | 0.64681100  |
| H | -4.20090200 | -4.45313000 | -1.11267400 |
| H | -2.89609800 | -5.37546000 | -0.35922800 |
| C | -6.74114500 | -0.58809100 | 0.09602100  |
| C | -7.33709500 | 0.82842500  | 0.12430700  |
| H | -6.88860700 | 1.43929000  | 0.91420400  |

|   |             |             |             |
|---|-------------|-------------|-------------|
| H | -7.19778700 | 1.34431500  | -0.83136600 |
| H | -8.41279300 | 0.77344900  | 0.31768300  |
| C | -7.45391000 | -1.39311800 | -1.01218600 |
| H | -7.09615400 | -2.42573400 | -1.05745600 |
| H | -8.53362800 | -1.42210100 | -0.82908700 |
| H | -7.28473500 | -0.93716400 | -1.99285500 |
| C | -7.00460300 | -1.25256900 | 1.46516900  |
| H | -6.63244000 | -2.28072200 | 1.49386400  |
| H | -6.50958800 | -0.69552400 | 2.26683400  |
| H | -8.07908500 | -1.27945300 | 1.67758900  |

### H<sub>2</sub>O-aCo<sup>III</sup>-OAc

Charge: 0

Spin Multiplicity: 5

Sum of electronic and thermal Free Energies (a.u.): -2112.731673

No imaginary frequency

|    |             |             |             |
|----|-------------|-------------|-------------|
| C  | 5.03476600  | -1.53887000 | 0.13675200  |
| C  | 5.64782900  | -0.26502600 | 0.17355600  |
| C  | 3.66351200  | -1.74775200 | 0.10573100  |
| H  | 5.68269700  | -2.40583300 | 0.13332400  |
| C  | 4.81137600  | 0.83637700  | 0.17692000  |
| C  | 2.81898300  | -0.59373500 | 0.10371700  |
| C  | 3.40733800  | 0.70135100  | 0.13955500  |
| H  | 5.21930200  | 1.84104900  | 0.20680600  |
| O  | 1.51838900  | -0.74552000 | 0.05815100  |
| C  | 2.61964600  | 1.91115600  | 0.15506700  |
| Co | 0.04217700  | 0.37451000  | -0.17470500 |
| N  | 1.33434400  | 1.99003600  | 0.09392200  |
| H  | 3.20693900  | 2.82914600  | 0.23405700  |
| N  | -1.15266300 | 1.93671700  | -0.82356100 |
| C  | 0.62115600  | 3.26923200  | 0.13745300  |
| C  | -2.43723800 | 1.82908100  | -0.79255900 |
| C  | -0.45887800 | 3.21633200  | -0.97116400 |
| C  | 1.47139300  | 4.53445800  | 0.02119300  |
| H  | -3.05231400 | 2.72706500  | -0.87399800 |
| C  | -3.17389800 | 0.60013100  | -0.61216600 |
| C  | -1.33699300 | 4.46876500  | -0.93299100 |
| C  | 0.58482900  | 5.78635700  | 0.04891600  |
| H  | 2.04698300  | 4.51034300  | -0.91520700 |
| H  | 2.19352800  | 4.58037300  | 0.84387100  |
| C  | -4.55046700 | 0.70649500  | -0.32435500 |
| C  | -2.55361600 | -0.67801700 | -0.70476100 |
| C  | -0.48137200 | 5.73642700  | -1.04948500 |
| H  | -2.07195000 | 4.44115400  | -1.74541500 |
| H  | -1.89032300 | 4.48171000  | 0.01447000  |
| H  | 1.20472300  | 6.68285600  | -0.05995600 |
| H  | 0.09347300  | 5.85678600  | 1.02780100  |
| C  | -5.32601800 | -0.41347100 | -0.08708100 |
| H  | -4.97859000 | 1.70126900  | -0.26622600 |
| C  | -3.33935000 | -1.84704800 | -0.47988400 |
| O  | -1.27109600 | -0.77490100 | -0.99929500 |
| H  | 0.00700200  | 5.75726500  | -2.03333000 |
| H  | -1.12366000 | 6.62214500  | -0.99912400 |
| C  | -4.68324200 | -1.66903700 | -0.17521200 |
| H  | -5.28186400 | -2.55000500 | 0.01709700  |
| O  | -0.80375100 | 0.13555800  | 1.55453800  |
| C  | -1.52949200 | 0.98684500  | 2.22973900  |
| O  | -1.45640200 | 2.21603500  | 2.16453600  |
| C  | -2.56164500 | 0.30526000  | 3.11759200  |
| H  | -3.04159100 | 1.03090200  | 3.77567900  |
| H  | -3.31568300 | -0.16511800 | 2.47714900  |
| H  | -2.09188000 | -0.48843100 | 3.70453600  |
| H  | 0.06596500  | 3.16884400  | -1.93655800 |
| H  | 0.07183500  | 3.25713600  | 1.08735500  |
| O  | 0.69397000  | 0.22875800  | -2.46535800 |
| H  | -0.14524800 | -0.26228800 | -2.52912200 |
| H  | 1.36547000  | -0.45826300 | -2.34736600 |
| C  | 3.04622400  | -3.15478600 | 0.08124600  |
| C  | 2.16179900  | -3.33278500 | -1.17633700 |



|   |             |             |             |
|---|-------------|-------------|-------------|
| H | 1.31003200  | -2.65314000 | -1.16323100 |
| H | 2.74692600  | -3.15955100 | -2.08716700 |
| H | 1.77433500  | -4.35639200 | -1.21745100 |
| C | 4.12522900  | -4.25109200 | 0.04692900  |
| H | 4.77197800  | -4.21651300 | 0.92959900  |
| H | 3.64116600  | -5.23215800 | 0.03298900  |
| H | 4.75522300  | -4.17959400 | -0.84622500 |
| C | 2.19473200  | -3.36521200 | 1.35460500  |
| H | 2.82314400  | -3.29781600 | 2.24889500  |
| H | 1.40231600  | -2.62095500 | 1.43119300  |
| H | 1.73497800  | -4.35959300 | 1.33699200  |
| C | 7.17710700  | -0.16547500 | 0.20946400  |
| C | 7.66007300  | 1.29332300  | 0.24835600  |
| H | 7.33448000  | 1.85073000  | -0.63589100 |
| H | 7.29577100  | 1.81602400  | 1.13859700  |
| H | 8.75377000  | 1.32003100  | 0.27277200  |
| C | 7.70847500  | -0.88523300 | 1.46837700  |
| H | 7.42824200  | -1.94238200 | 1.47931800  |
| H | 8.80186500  | -0.82916900 | 1.50781700  |
| H | 7.30821000  | -0.42391400 | 2.37658000  |
| C | 7.76429800  | -0.83659900 | -1.05151900 |
| H | 8.85836100  | -0.78123600 | -1.03981600 |
| H | 7.48467900  | -1.89203500 | -1.11617100 |
| H | 7.40560800  | -0.33920200 | -1.95822100 |
| C | -2.69286600 | -3.24025900 | -0.52682200 |
| C | -2.08489300 | -3.49617000 | -1.92423000 |
| H | -2.85942300 | -3.45238800 | -2.69761100 |
| H | -1.31765200 | -2.75859700 | -2.15874300 |
| H | -1.62904700 | -4.49202900 | -1.95661600 |
| C | -1.58906100 | -3.33482200 | 0.55121300  |
| H | -0.81111200 | -2.59128400 | 0.39137200  |
| H | -2.01011100 | -3.17451900 | 1.54868900  |
| H | -1.13111600 | -4.33033400 | 0.52896100  |
| C | -3.71483100 | -4.35750700 | -0.25273900 |
| H | -4.15882500 | -4.27055000 | 0.74432200  |
| H | -4.52310800 | -4.36641000 | -0.99184700 |
| H | -3.20960100 | -5.32679800 | -0.30348400 |
| C | -6.81312500 | -0.35013500 | 0.27889100  |
| C | -7.33637300 | 1.09468900  | 0.31566200  |
| H | -6.80987800 | 1.69595000  | 1.06368300  |
| H | -7.23241000 | 1.58660500  | -0.65695500 |
| H | -8.39914900 | 1.09669200  | 0.57671100  |
| C | -7.63659500 | -1.13771200 | -0.76310100 |
| H | -7.33386000 | -2.18769700 | -0.80955800 |
| H | -8.70213000 | -1.10862700 | -0.50993100 |
| H | -7.50987800 | -0.70860700 | -1.76211700 |
| C | -7.01874000 | -0.97519600 | 1.67629300  |
| H | -6.69769200 | -2.02048200 | 1.70269900  |
| H | -6.44405700 | -0.42996400 | 2.43167900  |
| H | -8.07670600 | -0.94272900 | 1.95934800  |

**PO-aCo<sup>III</sup>-OAc**

Charge: 0

Spin Multiplicity: 1

Sum of electronic and thermal Free Energies (a.u.): -2229.378271

No imaginary frequency

|    |             |             |             |
|----|-------------|-------------|-------------|
| C  | -4.72305300 | -1.54598200 | -0.22134100 |
| C  | -5.37562800 | -0.32115600 | 0.05480300  |
| C  | -3.37313800 | -1.68286100 | -0.50690100 |
| H  | -5.33056500 | -2.44148000 | -0.21527300 |
| C  | -4.59548400 | 0.81370000  | -0.00039600 |
| C  | -2.54818300 | -0.50028400 | -0.47945100 |
| C  | -3.20591500 | 0.74998600  | -0.25524000 |
| H  | -5.02966200 | 1.79465800  | 0.16357700  |
| O  | -1.25709800 | -0.60171500 | -0.65926300 |
| C  | -2.50406100 | 1.99950800  | -0.31621600 |
| Co | 0.01754300  | 0.71935800  | -0.14538500 |
| N  | -1.22509000 | 2.14001300  | -0.34603000 |
| H  | -3.12674200 | 2.89512400  | -0.34014500 |

|   |             |             |             |
|---|-------------|-------------|-------------|
| N | 1.23705400  | 2.06496400  | 0.43553100  |
| C | -0.53129300 | 3.42014800  | -0.46597700 |
| C | 2.51717800  | 1.90218300  | 0.42500700  |
| C | 0.58949700  | 3.37298700  | 0.59225600  |
| C | -1.37728500 | 4.68280800  | -0.32684200 |
| H | 3.15167300  | 2.77880800  | 0.55948800  |
| C | 3.21538000  | 0.65931600  | 0.28747500  |
| C | 1.48904500  | 4.60466300  | 0.49349800  |
| C | -0.47843900 | 5.92429700  | -0.42310900 |
| H | -1.89879600 | 4.67586100  | 0.64048600  |
| H | -2.14201100 | 4.71430500  | -1.11015500 |
| C | 4.62820600  | 0.73455000  | 0.25160600  |
| C | 2.54038700  | -0.60249300 | 0.27992800  |
| C | 0.64820000  | 5.88452700  | 0.61617300  |
| H | 2.25348800  | 4.58848700  | 1.27803800  |
| H | 2.00952000  | 4.59125200  | -0.47268600 |
| H | -1.08033100 | 6.83012000  | -0.29545600 |
| H | -0.04275200 | 5.97321700  | -1.42929600 |
| C | 5.41306700  | -0.39673800 | 0.23131300  |
| H | 5.07664200  | 1.72246700  | 0.23850400  |
| C | 3.35532200  | -1.78797300 | 0.36765900  |
| O | 1.23554900  | -0.69866500 | 0.23750800  |
| H | 0.21438800  | 5.93579400  | 1.62414700  |
| H | 1.29522400  | 6.76137000  | 0.50913300  |
| C | 4.73295600  | -1.63380200 | 0.31593900  |
| H | 5.34150100  | -2.52761800 | 0.34940000  |
| O | 0.59477700  | 1.18181900  | -1.85992200 |
| C | 0.93307500  | 0.51809100  | -2.94960500 |
| O | 1.13421500  | 1.13010200  | -3.99042400 |
| C | 1.12305200  | -0.97939200 | -2.85865400 |
| H | 1.06783400  | -1.41267400 | -3.85821000 |
| H | 2.11369300  | -1.18503000 | -2.44244200 |
| H | 0.38766500  | -1.42732400 | -2.19588000 |
| H | 0.09944700  | 3.36576700  | 1.57788700  |
| H | -0.04755900 | 3.39746700  | -1.45006800 |
| C | -2.77874900 | -3.05433700 | -0.86708200 |
| C | -1.66163700 | -3.44285300 | 0.12380100  |
| H | -0.84841900 | -2.72173100 | 0.09344800  |
| H | -2.05667700 | -3.49959300 | 1.14503600  |
| H | -1.25604000 | -4.42759900 | -0.13153100 |
| C | -3.83222900 | -4.17616700 | -0.83084200 |
| H | -4.64837600 | -3.99825200 | -1.53838300 |
| H | -3.35600000 | -5.12106400 | -1.10982100 |
| H | -4.26230400 | -4.30619600 | 0.16827200  |
| C | -2.21462000 | -2.99194200 | -2.30396200 |
| H | -3.02260600 | -2.81833900 | -3.02229800 |
| H | -1.48734300 | -2.18892600 | -2.40735000 |
| H | -1.72693300 | -3.93867600 | -2.56198700 |
| C | -6.87390600 | -0.31422200 | 0.37426300  |
| C | -7.39876700 | 1.10632200  | 0.63687100  |
| H | -6.88994700 | 1.57360300  | 1.48639200  |
| H | -7.27033800 | 1.75178200  | -0.23800400 |
| H | -8.46783000 | 1.07042600  | 0.86838300  |
| C | -7.66124400 | -0.90965900 | -0.81322700 |
| H | -7.35666700 | -1.93843700 | -1.02568600 |
| H | -8.73531900 | -0.91765300 | -0.59665200 |
| H | -7.49810200 | -0.31934100 | -1.72025900 |
| C | -7.12963600 | -1.16619000 | 1.63677600  |
| H | -8.19780100 | -1.18368300 | 1.88035700  |
| H | -6.80165400 | -2.20056000 | 1.49866000  |
| H | -6.58910400 | -0.75589900 | 2.49611500  |
| C | 2.73203000  | -3.18503700 | 0.54482700  |
| C | 1.84312600  | -3.19513500 | 1.80809700  |
| H | 2.43488900  | -2.95644600 | 2.69900000  |
| H | 1.03785500  | -2.46965100 | 1.71832700  |
| H | 1.40015200  | -4.18690800 | 1.95045100  |
| C | 1.88921000  | -3.56742000 | -0.68748400 |
| H | 1.08654100  | -2.85378100 | -0.84727400 |
| H | 2.51204100  | -3.59418900 | -1.58719700 |

|   |             |             |             |
|---|-------------|-------------|-------------|
| H | 1.45017800  | -4.56175400 | -0.54845200 |
| C | 3.80025200  | -4.27845100 | 0.73209500  |
| H | 4.44125400  | -4.38321800 | -0.14914900 |
| H | 4.43666600  | -4.08960500 | 1.60305900  |
| H | 3.30119800  | -5.23975600 | 0.88808600  |
| C | 6.94293500  | -0.37499000 | 0.15272600  |
| C | 7.49301000  | 1.05800000  | 0.07246300  |
| H | 7.11757100  | 1.58447200  | -0.81078200 |
| H | 7.22890800  | 1.64256500  | 0.95997200  |
| H | 8.58510700  | 1.03284900  | 0.00591000  |
| C | 7.53671100  | -1.05287900 | 1.40680000  |
| H | 7.20908300  | -2.09247000 | 1.49899800  |
| H | 8.63144700  | -1.05147700 | 1.36169400  |
| H | 7.23037600  | -0.52390300 | 2.31501900  |
| C | 7.39913800  | -1.14063400 | -1.10840500 |
| H | 7.06268500  | -2.18137800 | -1.09244100 |
| H | 6.99565700  | -0.67332600 | -2.01198100 |
| H | 8.49244500  | -1.14368700 | -1.18115400 |
| C | -1.07909700 | -0.64500600 | 2.39705100  |
| C | 0.08735800  | 0.09749000  | 2.88943400  |
| O | -0.69541000 | 0.62516300  | 1.78505100  |
| H | -0.87320100 | -1.47741300 | 1.73529100  |
| H | 1.08064700  | -0.23157000 | 2.60648100  |
| H | 0.00253900  | 0.69944800  | 3.79081500  |
| C | -2.41607600 | -0.64049700 | 3.07821200  |
| H | -3.21705100 | -0.68401600 | 2.33554800  |
| H | -2.50142800 | -1.51953600 | 3.72574500  |
| H | -2.54459900 | 0.25832200  | 3.68755600  |

**PO-aCo<sup>III</sup>-OAc**

Charge: 0

Spin Multiplicity: 3

Sum of electronic and thermal Free Energies (a.u.): -2229.387936

No imaginary frequency

|    |             |             |             |
|----|-------------|-------------|-------------|
| C  | 4.76444200  | -1.53771500 | 0.42248200  |
| C  | 5.41162600  | -0.29283100 | 0.21724100  |
| C  | 3.39826300  | -1.70552200 | 0.57102500  |
| H  | 5.39070800  | -2.41881000 | 0.47342400  |
| C  | 4.60977300  | 0.82690200  | 0.20667500  |
| C  | 2.56177600  | -0.53854400 | 0.46377700  |
| C  | 3.20235000  | 0.73155200  | 0.32966600  |
| H  | 5.03772200  | 1.81746400  | 0.09485900  |
| O  | 1.26515700  | -0.67328000 | 0.49882300  |
| C  | 2.46164700  | 1.95271300  | 0.36191400  |
| Co | -0.02427300 | 0.62550700  | 0.06453400  |
| N  | 1.17294200  | 2.06539600  | 0.36356900  |
| H  | 3.05614000  | 2.86566000  | 0.40368500  |
| N  | -1.23490300 | 1.98349600  | -0.53301300 |
| C  | 0.46481900  | 3.34612600  | 0.45000100  |
| C  | -2.50658600 | 1.79637500  | -0.64630100 |
| C  | -0.59614900 | 3.29944700  | -0.66367300 |
| C  | 1.30706000  | 4.61447300  | 0.36702100  |
| H  | -3.14454800 | 2.65666400  | -0.84440400 |
| C  | -3.17161400 | 0.53593700  | -0.50725300 |
| C  | -1.52160000 | 4.51218200  | -0.57522000 |
| C  | 0.38709800  | 5.84238500  | 0.44903000  |
| H  | 1.87026400  | 4.63336300  | -0.57708800 |
| H  | 2.03659500  | 4.64260700  | 1.18394600  |
| C  | -4.58200500 | 0.55146500  | -0.42339800 |
| C  | -2.44673200 | -0.69194700 | -0.48349000 |
| C  | -0.69654200 | 5.80683600  | -0.63525900 |
| H  | -2.24948900 | 4.50568600  | -1.39424700 |
| H  | -2.07337900 | 4.45160600  | 0.36991500  |
| H  | 0.98119100  | 6.75832300  | 0.36139500  |
| H  | -0.08964600 | 5.86426900  | 1.43682800  |
| C  | -5.30641800 | -0.61388800 | -0.28225700 |
| H  | -5.07674200 | 1.51625000  | -0.44752000 |
| C  | -3.18958400 | -1.91046900 | -0.35535900 |
| O  | -1.13839200 | -0.72872200 | -0.60154000 |

|   |             |             |             |
|---|-------------|-------------|-------------|
| H | -0.22330500 | 5.88917800  | -1.62354700 |
| H | -1.36158600 | 6.67094100  | -0.53391900 |
| C | -4.57018700 | -1.82187700 | -0.25492400 |
| H | -5.12824300 | -2.74132000 | -0.13433400 |
| O | -0.92686200 | 0.46076900  | 1.87116500  |
| C | -1.77468200 | 1.27028400  | 2.41863900  |
| O | -1.81979500 | 2.50315800  | 2.27575600  |
| C | -2.81810700 | 0.56297100  | 3.28034200  |
| H | -3.39047300 | 1.28354400  | 3.86695500  |
| H | -3.49648300 | 0.01009300  | 2.62080800  |
| H | -2.33793700 | -0.16678400 | 3.93747500  |
| H | -0.06931400 | 3.30102300  | -1.62935100 |
| H | -0.09873600 | 3.31059600  | 1.39187200  |
| C | 2.78345000  | -3.08405400 | 0.85710000  |
| C | 1.83743000  | -3.49741800 | -0.29003200 |
| H | 1.00305700  | -2.80538400 | -0.37285300 |
| H | 2.37700200  | -3.52855700 | -1.24367100 |
| H | 1.43191800  | -4.49728900 | -0.10150700 |
| C | 3.85782400  | -4.17770100 | 0.99128100  |
| H | 4.56318700  | -3.96335000 | 1.80085800  |
| H | 3.37078900  | -5.13002000 | 1.22161800  |
| H | 4.42564100  | -4.31485100 | 0.06452900  |
| C | 2.00251500  | -3.02545300 | 2.19070100  |
| H | 2.68116900  | -2.79217800 | 3.01812400  |
| H | 1.21884800  | -2.26906000 | 2.16026600  |
| H | 1.54011500  | -3.99735600 | 2.39543600  |
| C | 6.93297900  | -0.25282600 | 0.04163500  |
| C | 7.45084100  | 1.17967600  | -0.16357400 |
| H | 7.01437300  | 1.64252000  | -1.05465500 |
| H | 7.22884900  | 1.81659900  | 0.69873700  |
| H | 8.53727600  | 1.16607800  | -0.29438200 |
| C | 7.61583300  | -0.84014600 | 1.29602400  |
| H | 7.31562700  | -1.87673800 | 1.47351900  |
| H | 8.70537100  | -0.82337100 | 1.18210100  |
| H | 7.35482000  | -0.25958700 | 2.18634800  |
| C | 7.32359900  | -1.09120400 | -1.19524900 |
| H | 8.41006000  | -1.08466000 | -1.33644600 |
| H | 7.00631900  | -2.13306500 | -1.09380900 |
| H | 6.85802800  | -0.68637000 | -2.09972400 |
| C | -2.46113300 | -3.25807500 | -0.26750000 |
| C | -1.63668000 | -3.49626400 | -1.55263500 |
| H | -2.29799500 | -3.55079500 | -2.42479300 |
| H | -0.91720700 | -2.69520800 | -1.71335400 |
| H | -1.09248500 | -4.44418600 | -1.48069300 |
| C | -1.54850600 | -3.24963700 | 0.98018000  |
| H | -0.83952100 | -2.42475300 | 0.95410200  |
| H | -2.15338400 | -3.14769100 | 1.88717400  |
| H | -0.99288900 | -4.19147900 | 1.04617200  |
| C | -3.43744400 | -4.43902000 | -0.12462300 |
| H | -4.03490500 | -4.36928800 | 0.79018400  |
| H | -4.11896400 | -4.51701500 | -0.97872300 |
| H | -2.86559600 | -5.37056600 | -0.07186400 |
| C | -6.83126200 | -0.65346300 | -0.13843000 |
| C | -7.45173900 | 0.75122500  | -0.20464000 |
| H | -7.08273100 | 1.39377600  | 0.60106200  |
| H | -7.23979400 | 1.24137100  | -1.16055700 |
| H | -8.53899100 | 0.68102100  | -0.10154600 |
| C | -7.43595600 | -1.50514200 | -1.27561800 |
| H | -7.05739800 | -2.53115600 | -1.25905100 |
| H | -8.52652500 | -1.55043600 | -1.18119700 |
| H | -7.19418400 | -1.07513300 | -2.25285600 |
| C | -7.19703300 | -1.28130800 | 1.22447400  |
| H | -6.81222500 | -2.30106800 | 1.31586900  |
| H | -6.77882800 | -0.69156900 | 2.04618600  |
| H | -8.28491600 | -1.32166500 | 1.34850100  |
| C | 1.41561100  | -0.58884500 | -2.61295200 |
| C | 0.28036900  | 0.09941900  | -3.23741700 |
| O | 0.96645200  | 0.69785300  | -2.11440000 |
| H | 1.17200400  | -1.39490800 | -1.92864700 |

|   |             |             |             |
|---|-------------|-------------|-------------|
| H | -0.72817000 | -0.23552800 | -3.01089800 |
| H | 0.42214600  | 0.63109800  | -4.17651500 |
| C | 2.80091600  | -0.60920800 | -3.19440400 |
| H | 3.54445300  | -0.57860000 | -2.39208400 |
| H | 2.95599700  | -1.53024300 | -3.76640300 |
| H | 2.96195000  | 0.24667200  | -3.85606100 |

**PO-aCo<sup>III</sup>-OAc**

Charge: 0

Spin Multiplicity: 5

Sum of electronic and thermal Free Energies (a.u.): -2229.375092

No imaginary frequency

|    |             |             |             |
|----|-------------|-------------|-------------|
| C  | -4.91323600 | -1.49115600 | 0.02728900  |
| C  | -5.48923100 | -0.23421800 | 0.33273700  |
| C  | -3.59173000 | -1.67830600 | -0.34613700 |
| H  | -5.55543200 | -2.36064100 | 0.08426800  |
| C  | -4.67494500 | 0.87460600  | 0.20411700  |
| C  | -2.73420400 | -0.52614100 | -0.37904900 |
| C  | -3.31391300 | 0.76158300  | -0.15389800 |
| H  | -5.06555100 | 1.87110000  | 0.38204300  |
| O  | -1.46384600 | -0.68427700 | -0.61118700 |
| C  | -2.57454200 | 1.98656900  | -0.32322100 |
| Co | 0.02273200  | 0.50718400  | -0.54405700 |
| N  | -1.31643800 | 2.07554300  | -0.58699200 |
| H  | -3.17262200 | 2.89826600  | -0.23474900 |
| N  | 1.20499800  | 2.03409900  | 0.19169600  |
| C  | -0.61086900 | 3.33953800  | -0.75107100 |
| C  | 2.44988400  | 1.88829400  | 0.51857200  |
| C  | 0.53492500  | 3.33822300  | 0.28835600  |
| C  | -1.43774700 | 4.62218700  | -0.66135100 |
| H  | 3.02440200  | 2.77142500  | 0.80827500  |
| C  | 3.20160300  | 0.66842200  | 0.52792400  |
| C  | 1.42962200  | 4.57089000  | 0.10983600  |
| C  | -0.53830200 | 5.84792100  | -0.86415800 |
| H  | -1.91997800 | 4.68412500  | 0.32387800  |
| H  | -2.23590900 | 4.60565500  | -1.41179600 |
| C  | 4.58753100  | 0.76723900  | 0.78052300  |
| C  | 2.60645200  | -0.60238400 | 0.26707600  |
| C  | 0.60434300  | 5.86456000  | 0.15622000  |
| H  | 2.19571800  | 4.60907300  | 0.89057500  |
| H  | 1.95298100  | 4.48792900  | -0.85149600 |
| H  | -1.13162900 | 6.76529200  | -0.78706500 |
| H  | -0.12111400 | 5.82616200  | -1.87955200 |
| C  | 5.41045600  | -0.34021100 | 0.74366500  |
| H  | 4.99301700  | 1.75266400  | 0.98396400  |
| C  | 3.44930500  | -1.75818300 | 0.20214300  |
| O  | 1.31443200  | -0.72569300 | 0.12400900  |
| H  | 0.18510600  | 5.98821200  | 1.16415100  |
| H  | 1.25957200  | 6.72486300  | -0.01723200 |
| C  | 4.80246600  | -1.58297700 | 0.44088100  |
| H  | 5.44583700  | -2.45191600 | 0.38901800  |
| O  | 0.34945000  | 0.48797600  | -2.43277500 |
| C  | 1.53772200  | 0.32957600  | -2.97250600 |
| O  | 2.60023300  | 0.63564300  | -2.44116800 |
| C  | 1.48156100  | -0.29825200 | -4.35752700 |
| H  | 2.46335800  | -0.26184400 | -4.83137400 |
| H  | 1.16280100  | -1.34140200 | -4.25887900 |
| H  | 0.73895900  | 0.21039400  | -4.97829900 |
| H  | 0.05691500  | 3.37859800  | 1.27885900  |
| H  | -0.14043100 | 3.28624700  | -1.74326200 |
| C  | -1.00107100 | -0.63407500 | 2.45771900  |
| C  | 0.14576000  | 0.16554800  | 2.90492200  |
| O  | -0.70642200 | 0.64191600  | 1.84336500  |
| H  | -0.78281400 | -1.46598500 | 1.79489900  |
| H  | 1.14651800  | -0.11195000 | 2.58682400  |
| H  | 0.07315600  | 0.74034900  | 3.82690400  |
| C  | -2.30126700 | -0.70896800 | 3.20873700  |
| H  | -3.13847900 | -0.77374800 | 2.50745400  |
| H  | -2.32036000 | -1.60047900 | 3.84486500  |

|   |             |             |             |
|---|-------------|-------------|-------------|
| H | -2.44002600 | 0.17453100  | 3.83846700  |
| C | 2.85048500  | -3.13027700 | -0.13970400 |
| C | 3.93474100  | -4.21570600 | -0.25823300 |
| H | 3.46255100  | -5.16998900 | -0.51100300 |
| H | 4.65827800  | -3.98408100 | -1.04682100 |
| H | 4.48028300  | -4.35804300 | 0.68068800  |
| C | 2.10926300  | -3.06045200 | -1.49621800 |
| H | 1.25986000  | -2.38045900 | -1.45228600 |
| H | 2.78601900  | -2.71403600 | -2.28374700 |
| H | 1.74360700  | -4.05658900 | -1.76999000 |
| C | 1.87267800  | -3.56026100 | 0.97689500  |
| H | 2.40283600  | -3.67453400 | 1.92890600  |
| H | 1.08174400  | -2.82243200 | 1.10531200  |
| H | 1.41152500  | -4.52234700 | 0.72699800  |
| C | 6.92167500  | -0.28204100 | 0.99020500  |
| C | 7.40043200  | 1.14441200  | 1.30435800  |
| H | 7.19972000  | 1.82896600  | 0.47412000  |
| H | 6.91908900  | 1.54296600  | 2.20349500  |
| H | 8.48083200  | 1.14234600  | 1.47924100  |
| C | 7.66537800  | -0.77551000 | -0.27029100 |
| H | 8.74930600  | -0.74283500 | -0.11276300 |
| H | 7.39553300  | -1.80512200 | -0.52188200 |
| H | 7.42258600  | -0.14720600 | -1.13265000 |
| C | 7.28296400  | -1.18848600 | 2.18726800  |
| H | 6.99531000  | -2.22852400 | 2.00866300  |
| H | 8.36285500  | -1.16763400 | 2.37161000  |
| H | 6.77359000  | -0.85210000 | 3.09605000  |
| C | -3.04363900 | -3.05948400 | -0.74056400 |
| C | -2.51759500 | -2.99770000 | -2.19428800 |
| H | -3.32702400 | -2.73874600 | -2.88506400 |
| H | -1.72403100 | -2.25633900 | -2.29420500 |
| H | -2.12074600 | -3.97594300 | -2.48830100 |
| C | -4.13194500 | -4.14533100 | -0.67688000 |
| H | -4.52218300 | -4.27717200 | 0.33821100  |
| H | -4.97171800 | -3.92401500 | -1.34371800 |
| H | -3.70393900 | -5.10184600 | -0.99152900 |
| C | -1.89537300 | -3.48927500 | 0.19922000  |
| H | -1.04441800 | -2.81755300 | 0.10387000  |
| H | -2.22885000 | -3.50042900 | 1.24311400  |
| H | -1.56338700 | -4.50149200 | -0.05688000 |
| C | -6.95863300 | -0.16233900 | 0.76121100  |
| C | -7.40743300 | 1.28024300  | 1.04424700  |
| H | -6.81861800 | 1.73580700  | 1.84699200  |
| H | -7.32207700 | 1.91187200  | 0.15414300  |
| H | -8.45641300 | 1.28738300  | 1.35613400  |
| C | -7.85437600 | -0.73749600 | -0.35766200 |
| H | -7.60852400 | -1.78011100 | -0.57819900 |
| H | -8.90868600 | -0.69859100 | -0.06212500 |
| H | -7.73564400 | -0.16353200 | -1.28199100 |
| C | -7.15225200 | -0.99123200 | 2.05011600  |
| H | -8.19880200 | -0.96064100 | 2.37303400  |
| H | -6.87908900 | -2.03975200 | 1.90073800  |
| H | -6.53151800 | -0.59626000 | 2.86083600  |

**(salen)aCo<sup>III</sup>-OTs**

Charge: 0

Spin Multiplicity: 3

Sum of electronic and thermal Free Energies (a.u.): -2702.579765

No imaginary frequency

|   |             |             |            |
|---|-------------|-------------|------------|
| S | -0.73545600 | 1.38121100  | 2.28437700 |
| O | 0.02429500  | 1.70384300  | 3.50103700 |
| O | -1.36241800 | 2.51960900  | 1.56897800 |
| O | 0.10580600  | 0.51023300  | 1.33365600 |
| C | -2.05229600 | 0.25584900  | 2.73517100 |
| C | -1.83656600 | -0.66288100 | 3.76250300 |
| C | -3.24242200 | 0.24965100  | 2.01213100 |
| C | -2.82064300 | -1.60386800 | 4.05342600 |
| H | -0.91007000 | -0.62617800 | 4.32449600 |
| C | -4.21701700 | -0.69923100 | 2.31329300 |

|    |             |             |             |
|----|-------------|-------------|-------------|
| H  | -3.39869000 | 0.97717900  | 1.22591200  |
| C  | -4.01878100 | -1.64470600 | 3.32616300  |
| H  | -2.65604000 | -2.32179200 | 4.85257900  |
| H  | -5.14067500 | -0.71210600 | 1.74472800  |
| C  | -5.05340400 | -2.70755400 | 3.60026900  |
| H  | -4.82531600 | -3.62558200 | 3.04397000  |
| H  | -5.08768400 | -2.97191800 | 4.66138800  |
| H  | -6.05225200 | -2.38096100 | 3.29682500  |
| N  | 1.87092200  | 2.01610500  | -0.25969800 |
| N  | -0.51803800 | 2.12171200  | -1.19691600 |
| C  | 3.12686000  | 1.80384700  | -0.02210500 |
| H  | 3.74217200  | 2.65813400  | 0.25886600  |
| C  | -1.78922300 | 2.02618100  | -1.44303700 |
| H  | -2.33257500 | 2.93773600  | -1.68546000 |
| C  | 3.80510600  | 0.55139400  | -0.11029100 |
| C  | 5.19066900  | 0.53116200  | 0.17811800  |
| C  | 3.12972100  | -0.63155100 | -0.52772900 |
| C  | 5.92906300  | -0.62667000 | 0.06348400  |
| H  | 5.65343100  | 1.45910300  | 0.49588200  |
| C  | 3.88981600  | -1.83843900 | -0.67703300 |
| C  | 5.24009200  | -1.78657500 | -0.37066800 |
| H  | 5.81522100  | -2.69829600 | -0.46556300 |
| C  | -2.56647700 | 0.83556300  | -1.39769200 |
| C  | -3.96821900 | 0.95791600  | -1.56653700 |
| C  | -1.96533200 | -0.44061900 | -1.18552500 |
| C  | -4.79570400 | -0.14015400 | -1.49295900 |
| H  | -4.36942200 | 1.94966400  | -1.74357500 |
| C  | -2.82079900 | -1.58625700 | -1.05849600 |
| C  | -4.18104100 | -1.39018900 | -1.22095100 |
| H  | -4.83043300 | -2.24999700 | -1.12089800 |
| O  | 1.84725700  | -0.64771400 | -0.79356000 |
| O  | -0.66956500 | -0.59614400 | -1.11975200 |
| C  | 1.23640600  | 3.33484400  | -0.10792200 |
| C  | 2.15373400  | 4.55474000  | -0.10644500 |
| C  | 0.19253600  | 3.41506700  | -1.22907300 |
| C  | 1.30308500  | 5.82654200  | 0.03978800  |
| H  | 2.73450000  | 4.58852300  | -1.03869800 |
| H  | 2.86545300  | 4.49858100  | 0.72338500  |
| C  | -0.66988300 | 4.66732500  | -1.07028300 |
| C  | 0.22539200  | 5.91606400  | -1.04648900 |
| H  | 1.94989800  | 6.70941700  | 0.00683100  |
| H  | 0.82369300  | 5.81956700  | 1.02650500  |
| H  | -1.38604700 | 4.75558600  | -1.89402500 |
| H  | -1.23644500 | 4.57642400  | -0.13645500 |
| H  | 0.70665100  | 6.03420200  | -2.02709500 |
| H  | -0.39314600 | 6.80622300  | -0.89243100 |
| Co | 0.57329100  | 0.68192900  | -0.61951600 |
| H  | 0.73237700  | 3.46174500  | -2.18735100 |
| H  | 0.67623700  | 3.30294600  | 0.83344200  |
| C  | 3.21055600  | -3.13682900 | -1.13675600 |
| C  | 4.20903300  | -4.30342500 | -1.23618300 |
| H  | 4.66596200  | -4.53712500 | -0.26882000 |
| H  | 3.67881700  | -5.19904200 | -1.57343200 |
| H  | 5.00815300  | -4.10174400 | -1.95763300 |
| C  | 2.58628700  | -2.93480200 | -2.53671400 |
| H  | 1.84246600  | -2.13882800 | -2.52650700 |
| H  | 3.36098500  | -2.68315900 | -3.26955300 |
| H  | 2.09932000  | -3.86003200 | -2.86326000 |
| C  | 2.11782600  | -3.53580200 | -0.11966800 |
| H  | 2.55760100  | -3.70544800 | 0.86895700  |
| H  | 1.35689000  | -2.76311100 | -0.03249900 |
| H  | 1.63258000  | -4.46446200 | -0.43938400 |
| C  | 7.42656300  | -0.71305600 | 0.37636700  |
| C  | 7.99965600  | 0.64044600  | 0.82580800  |
| H  | 7.89034900  | 1.40384000  | 0.04852900  |
| H  | 7.51221100  | 1.00296200  | 1.73649100  |
| H  | 9.06768200  | 0.53693700  | 1.04022000  |
| C  | 8.18978300  | -1.16832300 | -0.88667500 |
| H  | 9.26260400  | -1.24292400 | -0.67807500 |

|   |             |             |             |
|---|-------------|-------------|-------------|
| H | 7.84960200  | -2.14754700 | -1.23555000 |
| H | 8.04839000  | -0.45420500 | -1.70414700 |
| C | 7.65294100  | -1.73663400 | 1.51053400  |
| H | 7.29677500  | -2.73309300 | 1.23398600  |
| H | 8.72004000  | -1.81661600 | 1.74504200  |
| H | 7.12347800  | -1.43237800 | 2.41869600  |
| C | -2.23201800 | -2.95697100 | -0.69838300 |
| C | -3.32677100 | -4.02904100 | -0.55648000 |
| H | -4.04402300 | -3.77594000 | 0.23180500  |
| H | -3.87702400 | -4.18695900 | -1.49057200 |
| H | -2.86067800 | -4.98057200 | -0.28381300 |
| C | -1.25625900 | -3.42072100 | -1.80278500 |
| H | -1.77467600 | -3.50502700 | -2.76458000 |
| H | -0.42624900 | -2.72530400 | -1.91279300 |
| H | -0.85092100 | -4.40643700 | -1.54951500 |
| C | -1.50431800 | -2.85629000 | 0.66297400  |
| H | -1.03111300 | -3.81589700 | 0.89874900  |
| H | -0.73773100 | -2.08307900 | 0.66035000  |
| H | -2.21570500 | -2.62202400 | 1.45824200  |
| C | -6.31434200 | -0.07187200 | -1.68828300 |
| C | -6.79083300 | 1.35602900  | -1.99898700 |
| H | -6.55760500 | 2.04646600  | -1.18204100 |
| H | -6.33644200 | 1.74192200  | -2.91719000 |
| H | -7.87625100 | 1.36214200  | -2.13761700 |
| C | -6.71402400 | -0.98496100 | -2.86829400 |
| H | -6.43740600 | -2.02728900 | -2.68614600 |
| H | -7.79712300 | -0.94965700 | -3.02836100 |
| H | -6.22007700 | -0.66426700 | -3.79081300 |
| C | -7.02998900 | -0.55042500 | -0.40665600 |
| H | -8.11562200 | -0.55055500 | -0.55269900 |
| H | -6.73151200 | -1.56547200 | -0.12863300 |
| H | -6.80192400 | 0.11227100  | 0.43405700  |

**(salen)aCo<sup>III</sup>-OTs**

Charge: 0

Spin Multiplicity: 5

Sum of electronic and thermal Free Energies (a.u.): -2702.573385

No imaginary frequency

|   |             |             |             |
|---|-------------|-------------|-------------|
| S | -0.64390100 | 1.33471700  | 2.55551300  |
| O | -0.03957500 | 1.53223900  | 3.87691100  |
| O | -1.05592700 | 2.53716700  | 1.79591600  |
| O | 0.27710600  | 0.42870200  | 1.69419600  |
| C | -2.11063100 | 0.33189000  | 2.76206000  |
| C | -2.12363100 | -0.67299600 | 3.73035600  |
| C | -3.21302300 | 0.54376800  | 1.93916400  |
| C | -3.24993200 | -1.48152500 | 3.85431200  |
| H | -1.26518400 | -0.80263800 | 4.37986500  |
| C | -4.32979400 | -0.27866900 | 2.06915300  |
| H | -3.19238300 | 1.34434600  | 1.21189400  |
| C | -4.36226900 | -1.30694800 | 3.01715100  |
| H | -3.26557200 | -2.26581200 | 4.60643000  |
| H | -5.18206100 | -0.12409500 | 1.41669100  |
| C | -5.54872800 | -2.23345100 | 3.10732500  |
| H | -5.35521400 | -3.16555200 | 2.56123200  |
| H | -5.76992200 | -2.50617300 | 4.14372300  |
| H | -6.44404000 | -1.77930500 | 2.67375300  |
| N | 1.96738300  | 1.97152300  | -0.19933100 |
| N | -0.49473700 | 2.02721700  | -1.12098700 |
| C | 3.24819000  | 1.81807500  | -0.16502400 |
| H | 3.88990100  | 2.69665300  | -0.06152200 |
| C | -1.74679700 | 1.95424800  | -1.43901200 |
| H | -2.26138600 | 2.86293100  | -1.75689800 |
| C | 3.94803800  | 0.56181200  | -0.23900900 |
| C | 5.35303700  | 0.58535600  | -0.13193700 |
| C | 3.26325100  | -0.67722200 | -0.42175000 |
| C | 6.10146100  | -0.57690300 | -0.18751800 |
| H | 5.83345900  | 1.54818800  | 0.00375200  |
| C | 4.02137800  | -1.89239500 | -0.48840600 |
| C | 5.39816400  | -1.79289500 | -0.36673400 |



|    |             |             |             |
|----|-------------|-------------|-------------|
| H  | 5.98105900  | -2.70351200 | -0.41033800 |
| C  | -2.58596100 | 0.78629900  | -1.40376400 |
| C  | -3.95565800 | 0.95866700  | -1.70456300 |
| C  | -2.08558100 | -0.50504000 | -1.07087400 |
| C  | -4.84188300 | -0.10109000 | -1.66638500 |
| H  | -4.29473600 | 1.95673100  | -1.96030200 |
| C  | -2.98466800 | -1.61766300 | -1.03170000 |
| C  | -4.31650100 | -1.37099300 | -1.32399900 |
| H  | -5.00809200 | -2.20259400 | -1.28563900 |
| O  | 1.96515800  | -0.72221100 | -0.53734500 |
| O  | -0.81876200 | -0.68093800 | -0.80568700 |
| C  | 1.32327500  | 3.28056600  | -0.11361400 |
| C  | 2.22291700  | 4.51285200  | -0.19364300 |
| C  | 0.23936100  | 3.30117200  | -1.21375200 |
| C  | 1.37573600  | 5.78730000  | -0.07986200 |
| H  | 2.77552400  | 4.51410000  | -1.14408100 |
| H  | 2.96329500  | 4.49109700  | 0.61334600  |
| C  | -0.60582900 | 4.57444900  | -1.10346000 |
| C  | 0.28358600  | 5.82464900  | -1.15294300 |
| H  | 2.01827900  | 6.67069600  | -0.15881200 |
| H  | 0.91103000  | 5.81918100  | 0.91356300  |
| H  | -1.33647300 | 4.62841400  | -1.91711600 |
| H  | -1.16069600 | 4.53363600  | -0.15851800 |
| H  | 0.75160200  | 5.89643100  | -2.14453000 |
| H  | -0.33637800 | 6.71958900  | -1.03438200 |
| Co | 0.54278100  | 0.46089500  | -0.23937100 |
| H  | 0.76147400  | 3.29435000  | -2.18352000 |
| H  | 0.78368800  | 3.28622200  | 0.84138600  |
| C  | 3.31131500  | -3.23878400 | -0.69458900 |
| C  | 4.30768900  | -4.41123800 | -0.71751900 |
| H  | 4.85872700  | -4.49920100 | 0.22474400  |
| H  | 3.75807500  | -5.34541500 | -0.86613800 |
| H  | 5.03090900  | -4.32137000 | -1.53503300 |
| C  | 2.56426600  | -3.22814500 | -2.04852500 |
| H  | 1.81869500  | -2.43401300 | -2.08139200 |
| H  | 3.26783000  | -3.08352300 | -2.87570800 |
| H  | 2.05532900  | -4.18625000 | -2.19988600 |
| C  | 2.30980100  | -3.49496200 | 0.45610700  |
| H  | 2.82720500  | -3.51125400 | 1.42111400  |
| H  | 1.53602200  | -2.72959800 | 0.49135600  |
| H  | 1.82692400  | -4.46804000 | 0.31387600  |
| C  | 7.62821900  | -0.60373000 | -0.06264200 |
| C  | 8.21797600  | 0.80344300  | 0.12390300  |
| H  | 7.98934700  | 1.45402900  | -0.72647500 |
| H  | 7.84327900  | 1.28139200  | 1.03464500  |
| H  | 9.30702400  | 0.73881900  | 0.20785900  |
| C  | 8.23561800  | -1.21881400 | -1.34282300 |
| H  | 9.32792500  | -1.25185100 | -1.26763200 |
| H  | 7.88197700  | -2.24014700 | -1.50985200 |
| H  | 7.97048300  | -0.62438000 | -2.22284500 |
| C  | 8.02537900  | -1.46220700 | 1.15857500  |
| H  | 7.66583500  | -2.49085000 | 1.06553000  |
| H  | 9.11546700  | -1.49721400 | 1.26059700  |
| H  | 7.60763200  | -1.04365000 | 2.07940700  |
| C  | -2.47009900 | -3.01487500 | -0.65636300 |
| C  | -3.60294900 | -4.05581000 | -0.65440900 |
| H  | -4.38239000 | -3.80749300 | 0.07424200  |
| H  | -4.07037700 | -4.16036900 | -1.63947200 |
| H  | -3.19315900 | -5.03187900 | -0.37833600 |
| C  | -1.40606000 | -3.47067200 | -1.68092200 |
| H  | -1.83047500 | -3.51066000 | -2.69013400 |
| H  | -0.55198800 | -2.79462400 | -1.68743200 |
| H  | -1.04946100 | -4.47409900 | -1.42308600 |
| C  | -1.85715500 | -2.99000000 | 0.76248000  |
| H  | -1.47630900 | -3.98593700 | 1.01531300  |
| H  | -1.03608200 | -2.27856600 | 0.83667200  |
| H  | -2.61083300 | -2.71433000 | 1.50292900  |
| C  | -6.33580900 | 0.03434600  | -1.98341400 |
| C  | -6.71945900 | 1.47638300  | -2.35187700 |

|   |             |             |             |
|---|-------------|-------------|-------------|
| H | -6.51123100 | 2.17166300  | -1.53227900 |
| H | -6.18351800 | 1.82193200  | -3.24169200 |
| H | -7.79077200 | 1.53064300  | -2.56809300 |
| C | -6.68797400 | -0.88144600 | -3.17647600 |
| H | -6.48035900 | -1.93239800 | -2.95642000 |
| H | -7.75195800 | -0.79550600 | -3.42252500 |
| H | -6.10747900 | -0.60411700 | -4.06187700 |
| C | -7.16952400 | -0.38656500 | -0.75321900 |
| H | -8.23932600 | -0.34767700 | -0.98545400 |
| H | -6.93431500 | -1.40492200 | -0.43073500 |
| H | -6.98348800 | 0.28607600  | 0.09022000  |

### H<sub>2</sub>O-aCo<sup>III</sup>-OTs

Charge: 0

Spin Multiplicity: 1

Sum of electronic and thermal Free Energies (a.u.): -2779.006845

No imaginary frequency

|   |             |             |             |
|---|-------------|-------------|-------------|
| S | -0.51846900 | 0.91269200  | 1.98183200  |
| O | 0.71338900  | 1.09296600  | 2.76680800  |
| O | -1.36322200 | 2.11708100  | 1.81897100  |
| O | -0.25073600 | 0.20947400  | 0.62069700  |
| C | -1.50720000 | -0.37397700 | 2.72851000  |
| C | -1.17173000 | -0.85489200 | 3.98871500  |
| C | -2.61248300 | -0.87309100 | 2.03360700  |
| C | -1.96164100 | -1.85180700 | 4.56522100  |
| H | -0.30046500 | -0.45649400 | 4.49623600  |
| C | -3.38116200 | -1.87135200 | 2.61856800  |
| H | -2.85500600 | -0.49787300 | 1.04901300  |
| C | -3.07026300 | -2.37524800 | 3.89231100  |
| H | -1.70664700 | -2.23273500 | 5.55030900  |
| H | -4.23285600 | -2.27218100 | 2.07474000  |
| C | -3.90947900 | -3.46915600 | 4.50395600  |
| H | -3.80187900 | -4.40674500 | 3.94597000  |
| H | -3.62074500 | -3.66312600 | 5.54017500  |
| H | -4.97307800 | -3.20768100 | 4.49151700  |
| N | 1.67646600  | 2.10701200  | -0.16686300 |
| N | -0.72913700 | 2.40103800  | -1.04697500 |
| C | 2.88908700  | 1.80826500  | 0.16327000  |
| H | 3.48883600  | 2.58136500  | 0.64300400  |
| C | -2.01169800 | 2.30139700  | -1.00864900 |
| H | -2.60141700 | 3.20404400  | -0.85712600 |
| C | 3.55058400  | 0.55549100  | -0.02460200 |
| C | 4.90191800  | 0.48678900  | 0.39466600  |
| C | 2.89761800  | -0.58090400 | -0.58571000 |
| C | 5.63653300  | -0.67229900 | 0.28262300  |
| H | 5.34226100  | 1.38621700  | 0.81169000  |
| C | 3.63311600  | -1.81371300 | -0.64292800 |
| C | 4.95696500  | -1.80180900 | -0.23212800 |
| H | 5.51181000  | -2.72905000 | -0.29145900 |
| C | -2.74556500 | 1.07449700  | -1.14139100 |
| C | -4.10581700 | 1.09688500  | -0.78674600 |
| C | -2.12137000 | -0.11941100 | -1.61156400 |
| C | -4.89212400 | -0.04156000 | -0.85835100 |
| H | -4.51826700 | 2.03066100  | -0.41506900 |
| C | -2.93342300 | -1.28524200 | -1.74198600 |
| C | -4.27204900 | -1.20237100 | -1.35837400 |
| H | -4.86938700 | -2.09846200 | -1.43605100 |
| O | 1.67531700  | -0.53586800 | -1.06390300 |
| O | -0.84129800 | -0.14203700 | -1.94158200 |
| C | 1.07373500  | 3.40922000  | 0.16573500  |
| C | 2.02481800  | 4.60193600  | 0.26701500  |
| C | -0.00117500 | 3.66412000  | -0.90184400 |
| C | 1.22305100  | 5.87416400  | 0.58513600  |
| H | 2.57139400  | 4.71819300  | -0.67876300 |
| H | 2.76525600  | 4.44063300  | 1.05624600  |
| C | -0.82618600 | 4.90124000  | -0.55688400 |
| C | 0.10349700  | 6.11824900  | -0.43391300 |
| H | 1.89732900  | 6.73629000  | 0.62116500  |
| H | 0.78417400  | 5.77362000  | 1.58597900  |

|    |             |             |             |
|----|-------------|-------------|-------------|
| H  | -1.58213700 | 5.08762500  | -1.32786300 |
| H  | -1.34956000 | 4.72543900  | 0.39070600  |
| H  | 0.54535800  | 6.33390100  | -1.41616200 |
| H  | -0.47893300 | 7.00138300  | -0.15145000 |
| Co | 0.43954500  | 0.90803000  | -0.97481400 |
| H  | 0.51728000  | 3.82867000  | -1.85739600 |
| H  | 0.55567500  | 3.28402900  | 1.12286900  |
| O  | 1.08536900  | 1.27879000  | -2.85734200 |
| H  | 0.28951100  | 0.85271100  | -3.23798300 |
| H  | 1.75055000  | 0.56442600  | -2.85323900 |
| C  | -2.32936200 | -2.61217000 | -2.22110700 |
| C  | -3.37722000 | -3.73538700 | -2.31057500 |
| H  | -4.18335800 | -3.49480900 | -3.01222500 |
| H  | -2.89072400 | -4.64908000 | -2.66554800 |
| H  | -3.82223300 | -3.96046600 | -1.33583300 |
| C  | -1.70724400 | -2.44474800 | -3.62517200 |
| H  | -2.46931300 | -2.14503400 | -4.35320900 |
| H  | -0.91904400 | -1.69267500 | -3.61456100 |
| H  | -1.27516900 | -3.39489300 | -3.95809900 |
| C  | -1.24819000 | -3.04640600 | -1.21182200 |
| H  | -0.47395800 | -2.28808000 | -1.12652400 |
| H  | -1.68603400 | -3.20032700 | -0.21991200 |
| H  | -0.78663400 | -3.98638000 | -1.53311800 |
| C  | 2.93727200  | -3.12241500 | -1.04651500 |
| C  | 1.88728700  | -3.43576100 | 0.04505100  |
| H  | 1.19267100  | -2.60705100 | 0.17921200  |
| H  | 1.31449400  | -4.33110200 | -0.21878600 |
| H  | 2.38812300  | -3.62091500 | 1.00106700  |
| C  | 2.27322300  | -3.01477700 | -2.43817000 |
| H  | 1.49452000  | -2.25591300 | -2.45296600 |
| H  | 3.02338300  | -2.76952800 | -3.19953800 |
| H  | 1.82466400  | -3.97663300 | -2.70968200 |
| C  | 3.91807400  | -4.30784000 | -1.10650900 |
| H  | 4.70939000  | -4.14879100 | -1.84734400 |
| H  | 4.38623400  | -4.50756800 | -0.13750300 |
| H  | 3.36996000  | -5.20995300 | -1.39494900 |
| C  | 7.10400300  | -0.79709000 | 0.70509700  |
| C  | 7.66308400  | 0.53148500  | 1.23881200  |
| H  | 7.61601200  | 1.32165500  | 0.48229700  |
| H  | 7.11860500  | 0.87121400  | 2.12568900  |
| H  | 8.71255100  | 0.40501300  | 1.52238400  |
| C  | 7.23107400  | -1.85858500 | 1.81960800  |
| H  | 6.88275500  | -2.84004600 | 1.48519300  |
| H  | 8.27614400  | -1.96383900 | 2.13165200  |
| H  | 6.63794200  | -1.57395000 | 2.69418200  |
| C  | 7.95270500  | -1.22684900 | -0.51118900 |
| H  | 9.00549200  | -1.33256900 | -0.22659800 |
| H  | 7.61919300  | -2.18589600 | -0.91802100 |
| H  | 7.88699900  | -0.48322000 | -1.31187600 |
| C  | -6.35166300 | -0.00932100 | -0.38598400 |
| C  | -6.39326500 | 0.41635600  | 1.09840300  |
| H  | -5.82160200 | -0.27861300 | 1.72084900  |
| H  | -5.96659900 | 1.41264100  | 1.24433600  |
| H  | -7.42648200 | 0.43714400  | 1.46264900  |
| C  | -7.03495200 | -1.38087100 | -0.51202000 |
| H  | -8.06805100 | -1.31109000 | -0.15777300 |
| H  | -7.06290000 | -1.72869500 | -1.54960400 |
| H  | -6.52888000 | -2.14237100 | 0.09041200  |
| C  | -7.14502500 | 1.00788400  | -1.23376600 |
| H  | -7.13488200 | 0.72437500  | -2.29106200 |
| H  | -8.18798100 | 1.05575100  | -0.90136100 |
| H  | -6.72256400 | 2.01379300  | -1.15298100 |

**H<sub>2</sub>O-aCo<sup>III</sup>-OTs**

Charge: 0

Spin Multiplicity: 3

Sum of electronic and thermal Free Energies (a.u.): -2779.004576

No imaginary frequency

|   |             |            |            |
|---|-------------|------------|------------|
| S | -0.79035400 | 1.14653500 | 2.24995400 |
|---|-------------|------------|------------|

|    |             |             |             |
|----|-------------|-------------|-------------|
| O  | 0.13080000  | 1.39926600  | 3.37030700  |
| O  | -1.49478400 | 2.33176700  | 1.70256900  |
| O  | -0.11014400 | 0.32251500  | 1.14680600  |
| C  | -2.03951300 | -0.01485600 | 2.78995700  |
| C  | -1.72485900 | -0.93729900 | 3.78626100  |
| C  | -3.26418700 | -0.06909500 | 2.12705500  |
| C  | -2.64613300 | -1.93037800 | 4.11183300  |
| H  | -0.76907500 | -0.86599300 | 4.29328800  |
| C  | -4.17418000 | -1.06820800 | 2.46271900  |
| H  | -3.49423700 | 0.65704400  | 1.35714100  |
| C  | -3.87715000 | -2.01836200 | 3.44829000  |
| H  | -2.40508600 | -2.65165900 | 4.88828900  |
| H  | -5.12546700 | -1.11853100 | 1.94354500  |
| C  | -4.84664900 | -3.13157400 | 3.75922000  |
| H  | -4.65212400 | -4.00672000 | 3.12646700  |
| H  | -4.76330400 | -3.45815700 | 4.79989500  |
| H  | -5.88081800 | -2.82320900 | 3.57966100  |
| N  | 1.80737500  | 2.03513500  | -0.12038900 |
| N  | -0.58142900 | 2.23833400  | -1.06592200 |
| C  | 3.03869500  | 1.78582900  | 0.19692400  |
| H  | 3.63030200  | 2.60219600  | 0.61010600  |
| C  | -1.85683300 | 2.15646700  | -1.25557700 |
| H  | -2.42193700 | 3.08094600  | -1.36129000 |
| C  | 3.72568200  | 0.54329500  | 0.04962300  |
| C  | 5.09506900  | 0.51178900  | 0.40971400  |
| C  | 3.08206600  | -0.61902200 | -0.46917800 |
| C  | 5.85344800  | -0.62757500 | 0.25635800  |
| H  | 5.53009700  | 1.42041600  | 0.81130700  |
| C  | 3.86805500  | -1.80538000 | -0.66203300 |
| C  | 5.20163700  | -1.76104600 | -0.29066600 |
| H  | 5.79403500  | -2.65684200 | -0.42332200 |
| C  | -2.62137000 | 0.94969800  | -1.30130800 |
| C  | -4.02949200 | 1.07573400  | -1.34018800 |
| C  | -2.00216600 | -0.33347600 | -1.29531700 |
| C  | -4.84937800 | -0.03324400 | -1.31956200 |
| H  | -4.44485100 | 2.07682200  | -1.37171500 |
| C  | -2.84028100 | -1.48925000 | -1.18124900 |
| C  | -4.21334500 | -1.29367400 | -1.21394600 |
| H  | -4.84958600 | -2.16564800 | -1.13801600 |
| O  | 1.81342100  | -0.63524400 | -0.78927900 |
| O  | -0.69901700 | -0.47487900 | -1.41336300 |
| C  | 1.16819800  | 3.33853600  | 0.13350700  |
| C  | 2.09344300  | 4.54900400  | 0.24023800  |
| C  | 0.14070400  | 3.51670500  | -0.99312700 |
| C  | 1.25297800  | 5.81615200  | 0.46278900  |
| H  | 2.69002400  | 4.64177300  | -0.67773300 |
| H  | 2.79015400  | 4.42887300  | 1.07579900  |
| C  | -0.71045800 | 4.76368800  | -0.75838400 |
| C  | 0.19708000  | 5.99707200  | -0.63329800 |
| H  | 1.90969600  | 6.69130700  | 0.50633600  |
| H  | 0.75470700  | 5.74344700  | 1.43758700  |
| H  | -1.41403500 | 4.91342200  | -1.58438900 |
| H  | -1.29195700 | 4.61732200  | 0.15946000  |
| H  | 0.69740500  | 6.17645200  | -1.59472000 |
| H  | -0.41349600 | 6.88237300  | -0.42767500 |
| Co | 0.55316700  | 0.75077700  | -0.72471400 |
| H  | 0.69447800  | 3.61727400  | -1.93777900 |
| H  | 0.60129900  | 3.23397600  | 1.06580700  |
| C  | 3.23285300  | -3.07777000 | -1.24429100 |
| C  | 2.64698600  | -2.78656000 | -2.64550300 |
| H  | 1.83924000  | -2.05774100 | -2.58696100 |
| H  | 3.42441000  | -2.41070900 | -3.32056000 |
| H  | 2.23970000  | -3.70584600 | -3.07936200 |
| C  | 2.11518500  | -3.57473900 | -0.30183000 |
| H  | 2.52669600  | -3.82609100 | 0.68129300  |
| H  | 1.34551400  | -2.81730900 | -0.17151400 |
| H  | 1.64878900  | -4.47564100 | -0.71591400 |
| C  | 4.26015300  | -4.21261300 | -1.40214800 |
| H  | 3.76146000  | -5.09026900 | -1.82401600 |

|   |             |             |             |
|---|-------------|-------------|-------------|
| H | 5.07713900  | -3.93861300 | -2.07838400 |
| H | 4.69135500  | -4.51138200 | -0.44126400 |
| C | 7.33461400  | -0.72016600 | 0.63757400  |
| C | 7.86422600  | 0.60320800  | 1.21266100  |
| H | 7.78450000  | 1.41976400  | 0.48758200  |
| H | 7.32496100  | 0.89367700  | 2.11993400  |
| H | 8.92109600  | 0.49574800  | 1.47508000  |
| C | 8.16673700  | -1.07291100 | -0.61461100 |
| H | 9.22889200  | -1.15027700 | -0.35797100 |
| H | 7.85932400  | -2.02794900 | -1.05027500 |
| H | 8.05539800  | -0.30248900 | -1.38421400 |
| C | 7.51974900  | -1.82127200 | 1.70458800  |
| H | 7.19282500  | -2.79896500 | 1.33902400  |
| H | 8.57494800  | -1.90616700 | 1.98647300  |
| H | 6.94126700  | -1.59024500 | 2.60436500  |
| C | -2.22809300 | -2.87822700 | -0.94682300 |
| C | -1.29654800 | -3.27355400 | -2.11351900 |
| H | -1.84542800 | -3.28183900 | -3.06223900 |
| H | -0.46026900 | -2.58258400 | -2.19752700 |
| H | -0.89842600 | -4.28018800 | -1.94505700 |
| C | -3.30876200 | -3.96696300 | -0.82244500 |
| H | -3.98528700 | -3.77437200 | 0.01683000  |
| H | -3.90542500 | -4.06641300 | -1.73601700 |
| H | -2.82394000 | -4.93031400 | -0.63794600 |
| C | -1.44370100 | -2.84694300 | 0.38609200  |
| H | -0.94608900 | -3.80998400 | 0.54502300  |
| H | -0.69291800 | -2.05810900 | 0.39742000  |
| H | -2.12384100 | -2.67144900 | 1.22339300  |
| C | -6.37836100 | 0.04285000  | -1.39753500 |
| C | -6.87583200 | 1.49104800  | -1.53154900 |
| H | -6.58806100 | 2.09867600  | -0.66760000 |
| H | -6.48506800 | 1.96963000  | -2.43528600 |
| H | -7.96820000 | 1.50273400  | -1.59515000 |
| C | -7.00221800 | -0.56414800 | -0.12271600 |
| H | -8.09562100 | -0.55028300 | -0.18843600 |
| H | -6.69135500 | -1.60226500 | 0.02696900  |
| H | -6.70850700 | 0.00916200  | 0.76203100  |
| C | -6.86033000 | -0.75261100 | -2.63071800 |
| H | -6.56901700 | -1.80521700 | -2.57219400 |
| H | -7.95221900 | -0.71130900 | -2.70940600 |
| H | -6.43421700 | -0.33837000 | -3.54985100 |
| O | 1.10073600  | 0.80106300  | -3.09829600 |
| H | 1.83796500  | 0.18576900  | -2.97352900 |
| H | 0.32628600  | 0.21368000  | -3.12784500 |

### H<sub>2</sub>O-aCo<sup>III</sup>-OTs

Charge: 0

Spin Multiplicity: 5

Sum of electronic and thermal Free Energies (a.u.): -2778.995533

No imaginary frequency

|   |             |             |             |
|---|-------------|-------------|-------------|
| S | -0.11392800 | 0.32137700  | 2.01041400  |
| O | 1.11209900  | 0.32312400  | 2.82699500  |
| O | -0.96128900 | 1.53203600  | 2.08135000  |
| O | 0.20274600  | -0.07452400 | 0.55359300  |
| C | -1.12465800 | -1.07443600 | 2.48408600  |
| C | -0.51688600 | -2.20755200 | 3.02034700  |
| C | -2.48744400 | -1.06165000 | 2.19005300  |
| C | -1.28666700 | -3.34440000 | 3.25804000  |
| H | 0.54368800  | -2.18586200 | 3.24511500  |
| C | -3.24233800 | -2.20617600 | 2.43222600  |
| H | -2.94242900 | -0.17180400 | 1.77147100  |
| C | -2.65519000 | -3.36465900 | 2.95851800  |
| H | -0.81864400 | -4.23082200 | 3.67800600  |
| H | -4.30208200 | -2.20431900 | 2.19943100  |
| C | -3.47427600 | -4.61472600 | 3.16441100  |
| H | -3.47730800 | -5.23365900 | 2.25845500  |
| H | -3.07327300 | -5.22826300 | 3.97630200  |
| H | -4.51586600 | -4.37608900 | 3.39893500  |
| N | 1.62976600  | 2.34666600  | -0.05762300 |

|    |             |             |             |
|----|-------------|-------------|-------------|
| N  | -0.91364000 | 2.61717900  | -0.71568700 |
| C  | 2.70523000  | 1.89622200  | 0.49848400  |
| H  | 3.13963200  | 2.44823300  | 1.33632900  |
| C  | -2.17886900 | 2.46955400  | -0.54725000 |
| H  | -2.77861400 | 3.31149700  | -0.19495100 |
| C  | 3.41494800  | 0.69667900  | 0.13518100  |
| C  | 4.55204900  | 0.37022300  | 0.90153600  |
| C  | 3.02489900  | -0.12941100 | -0.95768500 |
| C  | 5.31863800  | -0.74533200 | 0.62156900  |
| H  | 4.80015800  | 1.01999300  | 1.73296500  |
| C  | 3.82094300  | -1.26929700 | -1.28420900 |
| C  | 4.92386700  | -1.53314000 | -0.48227100 |
| H  | 5.52105300  | -2.40633200 | -0.70985300 |
| C  | -2.90910000 | 1.23929900  | -0.75001600 |
| C  | -4.25236900 | 1.21548500  | -0.32698300 |
| C  | -2.31868400 | 0.08513300  | -1.34061800 |
| C  | -5.02162000 | 0.06896300  | -0.42381100 |
| H  | -4.66357200 | 2.12639700  | 0.09361300  |
| C  | -3.07495400 | -1.12645300 | -1.39167200 |
| C  | -4.38906400 | -1.08225700 | -0.94150700 |
| H  | -4.96951000 | -1.99437200 | -0.98216200 |
| O  | 1.95209700  | 0.15449800  | -1.66951800 |
| O  | -1.09910700 | 0.14187900  | -1.84416000 |
| C  | 0.96721400  | 3.54302400  | 0.47775400  |
| C  | 1.87823400  | 4.76608400  | 0.62721800  |
| C  | -0.20811500 | 3.87017400  | -0.46483800 |
| C  | 1.07887200  | 5.96502800  | 1.15511900  |
| H  | 2.31870500  | 5.00187600  | -0.35089300 |
| H  | 2.70683500  | 4.54519900  | 1.30722700  |
| C  | -1.02763600 | 5.03888300  | 0.08185000  |
| C  | -0.13034700 | 6.27236900  | 0.26314400  |
| H  | 1.72824700  | 6.84400400  | 1.22936800  |
| H  | 0.73084600  | 5.74183000  | 2.17218200  |
| H  | -1.85416700 | 5.27657400  | -0.59755300 |
| H  | -1.46658600 | 4.75222000  | 1.04610900  |
| H  | 0.22158200  | 6.60758900  | -0.72185500 |
| H  | -0.71431700 | 7.09737400  | 0.68487200  |
| Co | 0.37597000  | 1.03626900  | -1.08850100 |
| H  | 0.22777200  | 4.15976900  | -1.43234800 |
| H  | 0.53593000  | 3.27120100  | 1.44964000  |
| C  | 3.44726900  | -2.17706100 | -2.46750100 |
| C  | 3.49035200  | -1.36724600 | -3.78288200 |
| H  | 2.77831500  | -0.54165600 | -3.75726500 |
| H  | 4.49092700  | -0.95677800 | -3.95422900 |
| H  | 3.23678900  | -2.01279700 | -4.63098500 |
| C  | 2.03342200  | -2.76277200 | -2.25915400 |
| H  | 1.98668700  | -3.33577100 | -1.32790200 |
| H  | 1.28138300  | -1.97809100 | -2.20900200 |
| H  | 1.78059300  | -3.43586100 | -3.08643600 |
| C  | 4.42485200  | -3.35614100 | -2.61962700 |
| H  | 4.11915500  | -3.96797500 | -3.47373700 |
| H  | 5.45075100  | -3.02040500 | -2.80405300 |
| H  | 4.42578800  | -4.00162800 | -1.73543500 |
| C  | 6.54451900  | -1.15681700 | 1.44412100  |
| C  | 6.82118600  | -0.17634500 | 2.59511400  |
| H  | 7.02326900  | 0.83411800  | 2.22504800  |
| H  | 5.97968700  | -0.12570100 | 3.29304200  |
| H  | 7.70057100  | -0.50533500 | 3.15739400  |
| C  | 7.78907000  | -1.19758000 | 0.53086600  |
| H  | 8.67342900  | -1.49797100 | 1.10352500  |
| H  | 7.66679700  | -1.90959500 | -0.29049800 |
| H  | 7.98223200  | -0.21263500 | 0.09395700  |
| C  | 6.30386500  | -2.55769100 | 2.04840700  |
| H  | 6.13797200  | -3.31006100 | 1.27186700  |
| H  | 7.17058600  | -2.87291100 | 2.63992300  |
| H  | 5.42552500  | -2.55092100 | 2.70103400  |
| C  | -2.42776100 | -2.44071200 | -1.85491500 |
| C  | -1.87062700 | -2.30525600 | -3.28966900 |
| H  | -2.66863600 | -2.03709800 | -3.99124000 |

|   |             |             |             |
|---|-------------|-------------|-------------|
| H | -1.09225600 | -1.54545100 | -3.34122500 |
| H | -1.44384400 | -3.26134000 | -3.61178800 |
| C | -3.43359600 | -3.60602300 | -1.85801900 |
| H | -3.83243000 | -3.80217400 | -0.85744900 |
| H | -4.27288900 | -3.42738300 | -2.53913200 |
| H | -2.92442200 | -4.51560000 | -2.19056900 |
| C | -1.29400800 | -2.80819800 | -0.86936500 |
| H | -0.77553500 | -3.70752200 | -1.22023000 |
| H | -0.56682500 | -2.00520500 | -0.76423500 |
| H | -1.70367800 | -3.01388900 | 0.12314500  |
| C | -6.49421700 | 0.00406700  | -0.00231900 |
| C | -7.00429200 | 1.35652100  | 0.52096700  |
| H | -6.44878500 | 1.68285400  | 1.40597500  |
| H | -6.92881000 | 2.13872600  | -0.24115800 |
| H | -8.05771800 | 1.26980300  | 0.80432900  |
| C | -6.67338600 | -1.04300700 | 1.11774300  |
| H | -7.72759800 | -1.11794700 | 1.40595600  |
| H | -6.34448200 | -2.03669900 | 0.79974700  |
| H | -6.09771000 | -0.76221700 | 2.00517400  |
| C | -7.35189600 | -0.40004200 | -1.22161300 |
| H | -7.05993900 | -1.37792400 | -1.61492300 |
| H | -8.41032000 | -0.45287600 | -0.94388900 |
| H | -7.24532600 | 0.33065800  | -2.02949500 |
| O | 0.61891900  | 1.89787400  | -3.17829000 |
| H | 1.41426200  | 1.35897200  | -3.32382400 |
| H | -0.11511800 | 1.38476300  | -3.55047800 |

#### PO-aCo<sup>III</sup>-OTs

Charge: 0

Spin Multiplicity: 3

Sum of electronic and thermal Free Energies (a.u.): -2895.652497

No imaginary frequency

|    |             |             |             |
|----|-------------|-------------|-------------|
| C  | 5.05925300  | -1.77752000 | 0.66100000  |
| C  | 5.77228100  | -0.55751400 | 0.66146300  |
| C  | 3.68119600  | -1.88838000 | 0.52319200  |
| H  | 5.62424600  | -2.68910500 | 0.78628700  |
| C  | 5.02139800  | 0.59772500  | 0.55862900  |
| C  | 2.92608500  | -0.68645400 | 0.31444100  |
| C  | 3.62123700  | 0.56143800  | 0.38907700  |
| H  | 5.50097000  | 1.57211200  | 0.60010200  |
| O  | 1.64277100  | -0.76200200 | 0.07882200  |
| C  | 2.92709400  | 1.81130300  | 0.36213800  |
| Co | 0.52790800  | 0.60770900  | -0.54287700 |
| N  | 1.67216800  | 1.97819200  | 0.10245900  |
| H  | 3.52390200  | 2.69103800  | 0.60234600  |
| N  | -0.52058200 | 2.04522200  | -1.23041500 |
| C  | 0.99937400  | 3.28201200  | 0.14469500  |
| C  | -1.77786000 | 1.92221600  | -1.49949600 |
| C  | 0.15886400  | 3.34509400  | -1.14281200 |
| C  | 1.88319000  | 4.51707200  | 0.29252900  |
| H  | -2.35610900 | 2.82076400  | -1.70233500 |
| C  | -2.49980100 | 0.68789900  | -1.54602500 |
| C  | -0.73492300 | 4.58434800  | -1.14091000 |
| C  | 0.99848300  | 5.77352300  | 0.28840300  |
| H  | 2.60638700  | 4.56302000  | -0.53388100 |
| H  | 2.45062300  | 4.46791000  | 1.22784700  |
| C  | -3.90551400 | 0.76879800  | -1.64736400 |
| C  | -1.83754900 | -0.57210100 | -1.48441700 |
| C  | 0.12562200  | 5.84578400  | -0.97032900 |
| H  | -1.30252900 | 4.65209700  | -2.07582500 |
| H  | -1.44900000 | 4.48989500  | -0.31508500 |
| H  | 1.62547500  | 6.66785000  | 0.36780200  |
| H  | 0.35429300  | 5.75540200  | 1.17610700  |
| C  | -4.69143000 | -0.36494200 | -1.66745900 |
| H  | -4.35060400 | 1.75672400  | -1.67246400 |
| C  | -2.64118500 | -1.75811800 | -1.51166800 |
| O  | -0.52636900 | -0.66456400 | -1.41966400 |
| H  | 0.76961200  | 5.96837200  | -1.85225600 |
| H  | -0.52178200 | 6.72795000  | -0.93032100 |

|   |             |             |             |
|---|-------------|-------------|-------------|
| C | -4.01823300 | -1.60693100 | -1.60214000 |
| H | -4.62588100 | -2.50236500 | -1.60005400 |
| C | 2.35678700  | -0.55784700 | -2.93016100 |
| C | 1.38576200  | 0.22545000  | -3.70216200 |
| O | 1.87511300  | 0.72048500  | -2.43282200 |
| H | 1.95782700  | -1.38905300 | -2.35810300 |
| H | 0.33993800  | -0.06844200 | -3.68539500 |
| H | 1.71988900  | 0.80778600  | -4.55841100 |
| C | 3.82445400  | -0.61260700 | -3.24485500 |
| H | 4.40338400  | -0.66891100 | -2.31798600 |
| H | 4.04808800  | -1.50410300 | -3.84036200 |
| H | 4.14037700  | 0.27240500  | -3.80426600 |
| H | 0.85982100  | 3.39327400  | -1.98898300 |
| H | 0.30601400  | 3.24427600  | 0.99146200  |
| S | -1.41290300 | 1.45303500  | 1.99139200  |
| O | -0.52069000 | 1.96927100  | 3.04838900  |
| O | -2.09263500 | 2.50648600  | 1.19147400  |
| O | -0.73152200 | 0.40961000  | 1.10978900  |
| C | -2.69325900 | 0.47034700  | 2.76521200  |
| C | -2.94443700 | 0.60989600  | 4.12614700  |
| C | -3.44742400 | -0.40961700 | 1.98475700  |
| C | -3.96629000 | -0.13932000 | 4.71209300  |
| H | -2.33454100 | 1.29026900  | 4.70997100  |
| C | -4.45666400 | -1.15468900 | 2.58466500  |
| H | -3.23395500 | -0.51984900 | 0.92976200  |
| C | -4.73344900 | -1.03106600 | 3.95518000  |
| H | -4.16596700 | -0.03318100 | 5.77519200  |
| H | -5.03767800 | -1.84686600 | 1.98122100  |
| C | -5.81573700 | -1.86526300 | 4.59481200  |
| H | -5.47856200 | -2.89739800 | 4.75081300  |
| H | -6.10708400 | -1.46352200 | 5.56916800  |
| H | -6.70955400 | -1.91017300 | 3.96409200  |
| C | -1.99448900 | -3.14044400 | -1.35387700 |
| C | -3.03224800 | -4.27606000 | -1.39409900 |
| H | -3.58022700 | -4.30217500 | -2.34228000 |
| H | -2.51631600 | -5.23472400 | -1.28368000 |
| H | -3.75660800 | -4.19860700 | -0.57674500 |
| C | -1.28978600 | -3.19787600 | 0.02085400  |
| H | -0.54066100 | -2.41545600 | 0.12058200  |
| H | -2.01998500 | -3.06905600 | 0.82633300  |
| H | -0.80275500 | -4.17004400 | 0.15336900  |
| C | -0.99066900 | -3.39253700 | -2.50094300 |
| H | -1.50895500 | -3.40015400 | -3.46650000 |
| H | -0.22099700 | -2.62288600 | -2.52727300 |
| H | -0.50574800 | -4.36583400 | -2.36938200 |
| C | -6.22228400 | -0.33351300 | -1.72093200 |
| C | -6.76464300 | 1.10279900  | -1.79410000 |
| H | -6.47638800 | 1.68752100  | -0.91500100 |
| H | -6.40699200 | 1.62420100  | -2.68806100 |
| H | -7.85801500 | 1.08332800  | -1.83633300 |
| C | -6.78832900 | -0.99864200 | -0.44699800 |
| H | -7.88377000 | -0.98411300 | -0.46181000 |
| H | -6.47073700 | -2.04251100 | -0.36260400 |
| H | -6.44682800 | -0.47089100 | 0.44817600  |
| C | -6.71175000 | -1.10369500 | -2.96617000 |
| H | -6.38331200 | -2.14701500 | -2.95295600 |
| H | -7.80629200 | -1.09925900 | -3.01251100 |
| H | -6.32831700 | -0.64378600 | -3.88261600 |
| C | 7.30009200  | -0.48610000 | 0.79279300  |
| C | 7.67262400  | 0.32384300  | 2.05330800  |
| H | 7.28138300  | 1.34436900  | 2.00816500  |
| H | 7.26674900  | -0.14969600 | 2.95255000  |
| H | 8.76111200  | 0.38812600  | 2.16035200  |
| C | 7.94184700  | -1.87872000 | 0.90868600  |
| H | 7.73163300  | -2.49708600 | 0.03012100  |
| H | 9.02840900  | -1.77684300 | 0.99007600  |
| H | 7.59224100  | -2.41453100 | 1.79679500  |
| C | 7.88292400  | 0.21155300  | -0.45555400 |
| H | 8.97412300  | 0.28033300  | -0.38456600 |



|   |            |             |             |
|---|------------|-------------|-------------|
| H | 7.63367800 | -0.34689600 | -1.36370800 |
| H | 7.48989400 | 1.22618600  | -0.56912500 |
| C | 2.97450900 | -3.24939800 | 0.61662600  |
| C | 1.96019600 | -3.20993000 | 1.78378800  |
| H | 1.22941600 | -2.41246900 | 1.65296200  |
| H | 1.42541200 | -4.16398500 | 1.84686900  |
| H | 2.48149700 | -3.05026200 | 2.73348300  |
| C | 2.24878900 | -3.57332200 | -0.70651700 |
| H | 1.46948500 | -2.84371200 | -0.91199200 |
| H | 2.95824600 | -3.58916200 | -1.54212200 |
| H | 1.78054900 | -4.56162200 | -0.64613700 |
| C | 3.96313900 | -4.39562000 | 0.89493900  |
| H | 4.69284600 | -4.51763000 | 0.08698600  |
| H | 4.50724000 | -4.25020300 | 1.83376000  |
| H | 3.40641200 | -5.33377800 | 0.97894700  |

### PO-aCo<sup>III</sup>-OTs

Charge: 0

Spin Multiplicity: 5

Sum of electronic and thermal Free Energies (a.u.): -2895.642332

No imaginary frequency

|    |             |             |             |
|----|-------------|-------------|-------------|
| C  | 5.20603500  | -1.79107100 | 0.36203000  |
| C  | 5.87696100  | -0.56674100 | 0.55351500  |
| C  | 3.83091700  | -1.90829600 | 0.17559700  |
| H  | 5.79315700  | -2.69730300 | 0.37017800  |
| C  | 5.09663700  | 0.58122300  | 0.58679500  |
| C  | 3.06285300  | -0.70584900 | 0.13330200  |
| C  | 3.70707000  | 0.54224000  | 0.38629300  |
| H  | 5.55515400  | 1.54892600  | 0.77261100  |
| O  | 1.78249200  | -0.76193500 | -0.12795500 |
| C  | 2.97699700  | 1.78485000  | 0.50733000  |
| Co | 0.46990300  | 0.49025300  | -0.52674100 |
| N  | 1.71638700  | 1.94520100  | 0.30627500  |
| H  | 3.58472000  | 2.63755300  | 0.81970300  |
| N  | -0.54458100 | 2.20951700  | -1.04534200 |
| C  | 1.04382700  | 3.23239200  | 0.47860400  |
| C  | -1.82105900 | 2.16984100  | -1.23566900 |
| C  | 0.17577600  | 3.45800500  | -0.78587400 |
| C  | 1.93047300  | 4.44554000  | 0.76013400  |
| H  | -2.38971000 | 3.10003700  | -1.22783100 |
| C  | -2.61693400 | 0.98211200  | -1.42176000 |
| C  | -0.67992900 | 4.71656400  | -0.62630500 |
| C  | 1.07234700  | 5.70882000  | 0.90856600  |
| H  | 2.65000600  | 4.58021000  | -0.06010300 |
| H  | 2.50699200  | 4.28170900  | 1.67696500  |
| C  | -4.01835000 | 1.14325200  | -1.40470500 |
| C  | -2.04265200 | -0.31349100 | -1.57816000 |
| C  | 0.20084100  | 5.93743500  | -0.33041100 |
| H  | -1.26495400 | 4.89589800  | -1.53566000 |
| H  | -1.38493300 | 4.55438300  | 0.19780500  |
| H  | 1.71581900  | 6.57668500  | 1.08902400  |
| H  | 0.42817500  | 5.60135300  | 1.79036200  |
| C  | -4.87324000 | 0.06116200  | -1.49991600 |
| H  | -4.40695300 | 2.14792200  | -1.28180100 |
| C  | -2.91004900 | -1.44771200 | -1.65302500 |
| O  | -0.73934900 | -0.45819100 | -1.65537600 |
| H  | 0.84570500  | 6.14039600  | -1.19676300 |
| H  | -0.42951400 | 6.82275400  | -0.19474000 |
| C  | -4.27876300 | -1.21689000 | -1.61543100 |
| H  | -4.94015600 | -2.07260000 | -1.66007300 |
| C  | 2.00401000  | -0.27795300 | -3.21185800 |
| C  | 1.12582200  | 0.78166000  | -3.72284300 |
| O  | 1.69565900  | 0.88382300  | -2.39642300 |
| H  | 1.51125200  | -1.17384300 | -2.84652700 |
| H  | 0.05225500  | 0.61870100  | -3.72487800 |
| H  | 1.51711700  | 1.51620700  | -4.42342600 |
| C  | 3.44982800  | -0.42159900 | -3.59172700 |
| H  | 4.02923600  | -0.75756000 | -2.72619900 |
| H  | 3.55993900  | -1.16631600 | -4.38699600 |

|   |             |             |             |
|---|-------------|-------------|-------------|
| H | 3.86070800  | 0.52993600  | -3.94026500 |
| H | 0.87015800  | 3.59454900  | -1.62868500 |
| H | 0.34827600  | 3.09970500  | 1.31487900  |
| S | -1.19911800 | 0.97342600  | 2.17718700  |
| O | -0.14867300 | 1.16410100  | 3.19169700  |
| O | -1.84502400 | 2.21158300  | 1.68047800  |
| O | -0.72843000 | 0.08537300  | 1.01058900  |
| C | -2.47622000 | -0.07045400 | 2.86686500  |
| C | -2.47328700 | -0.35699600 | 4.22713100  |
| C | -3.45932100 | -0.59494500 | 2.02267300  |
| C | -3.47212300 | -1.17990300 | 4.75175500  |
| H | -1.68729400 | 0.05086300  | 4.85272100  |
| C | -4.44010600 | -1.42063200 | 2.55946900  |
| H | -3.44333200 | -0.37564600 | 0.96289000  |
| C | -4.46520200 | -1.72274700 | 3.93072400  |
| H | -3.47281700 | -1.41000500 | 5.81384300  |
| H | -5.19645300 | -1.84342300 | 1.90418700  |
| C | -5.54930700 | -2.60607900 | 4.49672600  |
| H | -5.67274300 | -3.51630300 | 3.90033800  |
| H | -5.32743100 | -2.90253800 | 5.52533400  |
| H | -6.51711500 | -2.09029200 | 4.50068700  |
| C | -2.32479200 | -2.86722700 | -1.69244500 |
| C | -3.42510200 | -3.94157000 | -1.74008100 |
| H | -4.05686500 | -3.84558900 | -2.62975400 |
| H | -2.95961600 | -4.93143000 | -1.77010100 |
| H | -4.06710400 | -3.90732800 | -0.85377500 |
| C | -1.49060900 | -3.10637600 | -0.41195000 |
| H | -0.66832300 | -2.39862700 | -0.33017900 |
| H | -2.11523300 | -2.99632100 | 0.47984600  |
| H | -1.07763700 | -4.12153900 | -0.42058900 |
| C | -1.43996100 | -3.04723000 | -2.94614100 |
| H | -2.03354800 | -2.92268500 | -3.85866500 |
| H | -0.62884900 | -2.32005700 | -2.95920700 |
| H | -1.00729200 | -4.05387400 | -2.95770400 |
| C | -6.40029300 | 0.18488200  | -1.45508600 |
| C | -6.85602500 | 1.64794300  | -1.33462300 |
| H | -6.48638300 | 2.11088300  | -0.41430100 |
| H | -6.51410800 | 2.24823500  | -2.18400700 |
| H | -7.94925300 | 1.69421800  | -1.31372600 |
| C | -6.94133900 | -0.58960600 | -0.23334500 |
| H | -8.03344500 | -0.51580800 | -0.18510000 |
| H | -6.68198700 | -1.65159400 | -0.28243400 |
| H | -6.52730800 | -0.18447100 | 0.69470800  |
| C | -7.00280200 | -0.40747900 | -2.74738600 |
| H | -6.73996500 | -1.46212200 | -2.87041600 |
| H | -8.09589400 | -0.33563500 | -2.72820600 |
| H | -6.63929600 | 0.13249900  | -3.62748900 |
| C | 7.39700200  | -0.47395400 | 0.74482500  |
| C | 7.70434000  | 0.15206700  | 2.12260500  |
| H | 7.28200700  | 1.15691400  | 2.21339200  |
| H | 7.28675000  | -0.45955600 | 2.92830300  |
| H | 8.78651100  | 0.22924600  | 2.27537300  |
| C | 8.07973300  | -1.85019000 | 0.67885200  |
| H | 7.91527100  | -2.33911200 | -0.28672400 |
| H | 9.15956700  | -1.73105700 | 0.81057800  |
| H | 7.72212500  | -2.51938400 | 1.46772600  |
| C | 7.99546100  | 0.41505300  | -0.36720300 |
| H | 9.08120600  | 0.50039600  | -0.24782500 |
| H | 7.79208700  | -0.01005400 | -1.35532100 |
| H | 7.57606500  | 1.42508800  | -0.34514300 |
| C | 3.13812800  | -3.27624700 | 0.06126600  |
| C | 2.12587100  | -3.42554900 | 1.22206600  |
| H | 1.37375100  | -2.63645500 | 1.19978900  |
| H | 1.61507900  | -4.39212800 | 1.14879300  |
| H | 2.64129700  | -3.38605300 | 2.18724100  |
| C | 2.39650500  | -3.41425700 | -1.28756700 |
| H | 1.58149900  | -2.69678300 | -1.36112300 |
| H | 3.08353400  | -3.26445000 | -2.12804000 |
| H | 1.97168700  | -4.41999800 | -1.37614800 |

|   |            |             |             |
|---|------------|-------------|-------------|
| C | 4.14516800 | -4.43574100 | 0.15848700  |
| H | 4.87590900 | -4.41557600 | -0.65741200 |
| H | 4.68827500 | -4.42845900 | 1.10890800  |
| H | 3.60586500 | -5.38552200 | 0.09496800  |

**(salen)aCo<sup>III</sup>-OH**

Charge: 0

Spin Multiplicity: 1

Sum of electronic and thermal Free Energies (a.u.): -1883.656145

No imaginary frequency

|    |             |             |             |
|----|-------------|-------------|-------------|
| C  | 4.76174200  | -1.58797800 | -0.15311000 |
| C  | 5.45113800  | -0.36600900 | 0.05571100  |
| C  | 3.38673800  | -1.71609100 | -0.24293300 |
| H  | 5.36093100  | -2.48452100 | -0.24673300 |
| C  | 4.68108800  | 0.77045500  | 0.15707800  |
| C  | 2.58869800  | -0.52682500 | -0.10230900 |
| C  | 3.26735600  | 0.71814000  | 0.07419600  |
| H  | 5.13968700  | 1.74287800  | 0.30351600  |
| O  | 1.28927000  | -0.61496200 | -0.16245200 |
| C  | 2.56033500  | 1.95416800  | 0.15053500  |
| Co | -0.00192800 | 0.72345100  | 0.01143800  |
| N  | 1.27639100  | 2.10966300  | 0.05620800  |
| H  | 3.17738400  | 2.84199500  | 0.29350000  |
| N  | -1.26626600 | 2.08281800  | -0.37967400 |
| C  | 0.61551300  | 3.39758500  | 0.30327100  |
| C  | -2.55154900 | 1.91889600  | -0.40979700 |
| C  | -0.63398500 | 3.39661500  | -0.58892400 |
| C  | 1.44944500  | 4.66108300  | 0.09326200  |
| H  | -3.18036200 | 2.79159400  | -0.58972700 |
| C  | -3.24983400 | 0.68697500  | -0.23112500 |
| C  | -1.50139100 | 4.62945300  | -0.33122600 |
| C  | 0.58738500  | 5.90757000  | 0.34309600  |
| H  | 1.84317500  | 4.67289900  | -0.93213400 |
| H  | 2.30881800  | 4.67276000  | 0.77102600  |
| C  | -4.66594400 | 0.73937500  | -0.22450600 |
| C  | -2.56207000 | -0.55744100 | -0.09048800 |
| C  | -0.67354500 | 5.90822800  | -0.52826900 |
| H  | -2.36247000 | 4.64752100  | -1.00700100 |
| H  | -1.89168500 | 4.58390500  | 0.69371700  |
| H  | 1.17832800  | 6.81050100  | 0.15708000  |
| H  | 0.29634900  | 5.93424800  | 1.40141600  |
| C  | -5.42929300 | -0.39554300 | -0.06798200 |
| H  | -5.13249300 | 1.71156500  | -0.34538700 |
| C  | -3.35049200 | -1.74589300 | 0.09976400  |
| O  | -1.26176600 | -0.65278300 | -0.14979300 |
| H  | -0.38435400 | 5.98967800  | -1.58473700 |
| H  | -1.29019900 | 6.78501300  | -0.30458000 |
| C  | -4.72871100 | -1.61732400 | 0.09722200  |
| H  | -5.32104300 | -2.51220800 | 0.23818100  |
| O  | -0.20552100 | 0.87744100  | 1.80568400  |
| H  | -0.68286900 | 0.06774300  | 2.03950600  |
| C  | -2.66755400 | -3.10175300 | 0.33591100  |
| C  | -3.68813000 | -4.23898200 | 0.51877800  |
| H  | -3.15130700 | -5.17761400 | 0.68657900  |
| H  | -4.34017900 | -4.07369400 | 1.38301800  |
| H  | -4.31651100 | -4.37237200 | -0.36828300 |
| C  | -1.82278400 | -3.02221000 | 1.62842000  |
| H  | -1.05994500 | -2.24812300 | 1.55130500  |
| H  | -2.46263100 | -2.80434800 | 2.49051600  |
| H  | -1.32031800 | -3.97816000 | 1.81103500  |
| C  | -1.76876700 | -3.46829200 | -0.86579700 |
| H  | -2.36649200 | -3.54497700 | -1.78084100 |
| H  | -0.99204700 | -2.72168800 | -1.01634000 |
| H  | -1.29097200 | -4.43891400 | -0.69177400 |
| C  | 2.71736700  | -3.07521500 | -0.49604700 |
| C  | 1.92507400  | -3.01741200 | -1.82237300 |
| H  | 1.16666100  | -2.23572900 | -1.79214600 |
| H  | 2.60011200  | -2.81986800 | -2.66247400 |
| H  | 1.42817300  | -3.97662700 | -2.00461600 |

|   |             |             |             |
|---|-------------|-------------|-------------|
| C | 1.76908600  | -3.41990900 | 0.67317900  |
| H | 0.99429200  | -2.66435700 | 0.77966800  |
| H | 1.28973800  | -4.38872300 | 0.49326500  |
| H | 2.32752300  | -3.48658300 | 1.61327700  |
| C | 3.74559100  | -4.21352300 | -0.61659800 |
| H | 4.43907800  | -4.05643000 | -1.44966900 |
| H | 4.32994100  | -4.33804000 | 0.30132200  |
| H | 3.21749900  | -5.15411800 | -0.80070400 |
| C | 6.98045300  | -0.36995800 | 0.15021500  |
| C | 7.54704100  | 1.04111600  | 0.37454800  |
| H | 7.29073000  | 1.71465700  | -0.44974800 |
| H | 7.17658300  | 1.48086300  | 1.30618600  |
| H | 8.63866100  | 0.99654700  | 0.43927100  |
| C | 7.57678700  | -0.92839700 | -1.16035900 |
| H | 8.67105400  | -0.94561500 | -1.10686300 |
| H | 7.23672600  | -1.94908100 | -1.35735300 |
| H | 7.28464000  | -0.30841300 | -2.01387000 |
| C | 7.41831700  | -1.26128200 | 1.33298500  |
| H | 7.07141100  | -2.29157400 | 1.21284800  |
| H | 8.51092300  | -1.28353700 | 1.41264600  |
| H | 7.01273300  | -0.88032600 | 2.27549200  |
| C | -6.96151000 | -0.39697000 | -0.05385900 |
| C | -7.54028300 | 1.01370500  | -0.24726200 |
| H | -7.22559900 | 1.69212400  | 0.55235000  |
| H | -7.23569600 | 1.44657300  | -1.20569900 |
| H | -8.63380100 | 0.97087600  | -0.23476300 |
| C | -7.46325100 | -0.94466800 | 1.30022600  |
| H | -8.55856900 | -0.95970900 | 1.32577800  |
| H | -7.11170900 | -1.96477500 | 1.47948700  |
| H | -7.10903900 | -0.31945700 | 2.12587400  |
| C | -7.48477300 | -1.29588800 | -1.19539000 |
| H | -7.13124600 | -2.32590600 | -1.09341700 |
| H | -8.58028300 | -1.31710700 | -1.19553900 |
| H | -7.14852000 | -0.92226600 | -2.16774700 |
| H | 0.26819100  | 3.35421200  | 1.34540900  |
| H | -0.28540500 | 3.42376000  | -1.63345300 |

**(salen)aCo<sup>III</sup>-OH**

Charge: 0

Spin Multiplicity: 3

Sum of electronic and thermal Free Energies (a.u.): -1883.661608

No imaginary frequency

|    |             |             |             |
|----|-------------|-------------|-------------|
| C  | 4.69362400  | -1.63220100 | -0.39572200 |
| C  | 5.42490700  | -0.43832500 | -0.18129600 |
| C  | 3.31077200  | -1.72461600 | -0.39511900 |
| H  | 5.26139000  | -2.53728000 | -0.56969400 |
| C  | 4.69100400  | 0.70484500  | 0.05320900  |
| C  | 2.55686900  | -0.52673100 | -0.15603400 |
| C  | 3.27667400  | 0.68192100  | 0.08167200  |
| H  | 5.18286300  | 1.65604000  | 0.22850700  |
| O  | 1.24913300  | -0.57483100 | -0.17809700 |
| C  | 2.59771800  | 1.92419200  | 0.29073000  |
| Co | 0.02127100  | 0.69344700  | 0.49137400  |
| N  | 1.32294700  | 2.07454000  | 0.43864000  |
| H  | 3.22716900  | 2.81489100  | 0.30843400  |
| N  | -1.12806400 | 2.03658900  | -0.36116600 |
| C  | 0.65305400  | 3.37250400  | 0.52971200  |
| C  | -2.40450900 | 1.88067600  | -0.53493100 |
| C  | -0.45098400 | 3.32853700  | -0.55022800 |
| C  | 1.52294300  | 4.61924600  | 0.39002700  |
| H  | -2.99002600 | 2.73219400  | -0.88764100 |
| C  | -3.15566700 | 0.68956200  | -0.29937600 |
| C  | -1.32741200 | 4.58092800  | -0.48727200 |
| C  | 0.64317500  | 5.87576100  | 0.46366000  |
| H  | 2.05268300  | 4.59725600  | -0.57199900 |
| H  | 2.28118000  | 4.64194300  | 1.18009200  |
| C  | -4.55081100 | 0.75805700  | -0.55137300 |
| C  | -2.55848300 | -0.52561500 | 0.16715200  |
| C  | -0.46349700 | 5.84666600  | -0.59714500 |

|   |             |             |             |
|---|-------------|-------------|-------------|
| H | -2.06946100 | 4.57575200  | -1.29244600 |
| H | -1.87811100 | 4.58153000  | 0.46257700  |
| H | 1.26231700  | 6.77055400  | 0.34131700  |
| H | 0.19004400  | 5.93972600  | 1.46155000  |
| C | -5.37625800 | -0.32595700 | -0.36515300 |
| H | -4.94922900 | 1.70586800  | -0.89810800 |
| C | -3.41213000 | -1.67197600 | 0.34496200  |
| O | -1.28605000 | -0.64800400 | 0.42090800  |
| H | -0.00801600 | 5.88561300  | -1.59585300 |
| H | -1.09849400 | 6.73436500  | -0.50875200 |
| C | -4.76184200 | -1.52440100 | 0.08049900  |
| H | -5.40204500 | -2.38546000 | 0.22216900  |
| O | -0.13803500 | 0.90791500  | 2.29298800  |
| H | -0.75509600 | 0.22020100  | 2.58425000  |
| C | -2.81950600 | -3.01979500 | 0.78642700  |
| C | -3.90312500 | -4.10203600 | 0.94032500  |
| H | -3.43120700 | -5.03843000 | 1.25285700  |
| H | -4.64536200 | -3.83611900 | 1.70073900  |
| H | -4.42689300 | -4.29699800 | -0.00134600 |
| C | -2.10904300 | -2.88080700 | 2.15271700  |
| H | -1.27403000 | -2.18409000 | 2.09576300  |
| H | -2.81127800 | -2.52982300 | 2.91707200  |
| H | -1.72346400 | -3.85551700 | 2.47118100  |
| C | -1.81750900 | -3.50616400 | -0.28491200 |
| H | -2.32707400 | -3.65935800 | -1.24246700 |
| H | -1.01488700 | -2.78507200 | -0.42806300 |
| H | -1.37505100 | -4.46094400 | 0.02015700  |
| C | 2.58784400  | -3.06330000 | -0.60604200 |
| C | 1.67226100  | -2.98113400 | -1.84866700 |
| H | 0.93454900  | -2.18692200 | -1.74127500 |
| H | 2.26688800  | -2.78812600 | -2.74856000 |
| H | 1.14585700  | -3.93188000 | -1.98840400 |
| C | 1.75402200  | -3.39513000 | 0.65334100  |
| H | 1.01342900  | -2.62150600 | 0.85114000  |
| H | 1.23260400  | -4.34881900 | 0.51681400  |
| H | 2.40698900  | -3.48756400 | 1.52803300  |
| C | 3.57390300  | -4.22294100 | -0.83151200 |
| H | 4.19134600  | -4.07031200 | -1.72328500 |
| H | 4.23720500  | -4.37188400 | 0.02712400  |
| H | 3.00984500  | -5.14948400 | -0.97590500 |
| C | 6.95662300  | -0.47466200 | -0.21401600 |
| C | 7.57097600  | 0.91261800  | 0.03210700  |
| H | 7.25892100  | 1.63322300  | -0.73094100 |
| H | 7.29254400  | 1.30876300  | 1.01399800  |
| H | 8.66286900  | 0.84585900  | -0.00130700 |
| C | 7.42992500  | -0.97535800 | -1.59612600 |
| H | 8.52418200  | -1.01638500 | -1.63528000 |
| H | 7.05058600  | -1.97762200 | -1.81487000 |
| H | 7.08290900  | -0.30646900 | -2.39011300 |
| C | 7.47137100  | -1.43342300 | 0.88183000  |
| H | 7.09410800  | -2.45007800 | 0.73909400  |
| H | 8.56613200  | -1.47830400 | 0.86918700  |
| H | 7.15273000  | -1.09522800 | 1.87280300  |
| C | -6.88788500 | -0.30028800 | -0.61398000 |
| C | -7.36877400 | 1.07888900  | -1.09252700 |
| H | -7.16118300 | 1.85781300  | -0.35165300 |
| H | -6.89445500 | 1.36640200  | -2.03652200 |
| H | -8.45042600 | 1.05775000  | -1.25777800 |
| C | -7.62969100 | -0.64426300 | 0.69611100  |
| H | -8.71359900 | -0.63922300 | 0.53595400  |
| H | -7.35258400 | -1.63411900 | 1.06990400  |
| H | -7.39461300 | 0.08550100  | 1.47730800  |
| C | -7.24942700 | -1.34132500 | -1.69592400 |
| H | -6.96202900 | -2.35322200 | -1.39624300 |
| H | -8.32927700 | -1.34234300 | -1.88152900 |
| H | -6.73942700 | -1.11440200 | -2.63745400 |
| H | 0.15361600  | 3.38199600  | 1.50729600  |
| H | 0.05678600  | 3.29440100  | -1.52642000 |

**(salen)aCo<sup>III</sup>-OH**

Charge: 0

Spin Multiplicity: 5

Sum of electronic and thermal Free Energies (a.u.): -1883.658593

No imaginary frequency

|    |             |             |             |
|----|-------------|-------------|-------------|
| C  | 4.77056100  | -1.61089300 | -0.32873600 |
| C  | 5.48720000  | -0.39685000 | -0.17969900 |
| C  | 3.39043400  | -1.71994400 | -0.30434600 |
| H  | 5.34952300  | -2.51399300 | -0.47407900 |
| C  | 4.74168500  | 0.74847800  | 0.00185400  |
| C  | 2.62279100  | -0.52143200 | -0.10215900 |
| C  | 3.32782700  | 0.71434200  | 0.05341800  |
| H  | 5.22487700  | 1.71331500  | 0.11729100  |
| O  | 1.32142200  | -0.59053100 | -0.09379500 |
| C  | 2.64656700  | 1.96436200  | 0.21892900  |
| Co | 0.00810600  | 0.61004500  | 0.65233300  |
| N  | 1.36972800  | 2.11076500  | 0.36923200  |
| H  | 3.28850100  | 2.84995300  | 0.20741800  |
| N  | -1.18139200 | 2.05046100  | -0.21904800 |
| C  | 0.70701700  | 3.40730800  | 0.46688400  |
| C  | -2.45273400 | 1.89918500  | -0.42983400 |
| C  | -0.50439000 | 3.32868800  | -0.49079800 |
| C  | 1.55270100  | 4.65120700  | 0.19252700  |
| H  | -3.03312400 | 2.76039500  | -0.77088300 |
| C  | -3.22002100 | 0.70074100  | -0.26430400 |
| C  | -1.36373300 | 4.59323300  | -0.38711000 |
| C  | 0.69180000  | 5.91673500  | 0.30146600  |
| H  | 1.98758400  | 4.58278000  | -0.81401400 |
| H  | 2.38611300  | 4.70462500  | 0.90127500  |
| C  | -4.62026200 | 0.80496400  | -0.45241600 |
| C  | -2.62116100 | -0.56244100 | 0.03966500  |
| C  | -0.51747200 | 5.84956300  | -0.63711900 |
| H  | -2.18472300 | 4.56514300  | -1.11042500 |
| H  | -1.81577600 | 4.63305400  | 0.61287300  |
| H  | 1.29824600  | 6.80093400  | 0.07845500  |
| H  | 0.34326600  | 6.02732300  | 1.33687300  |
| C  | -5.45184800 | -0.28662300 | -0.32578700 |
| H  | -5.02250100 | 1.78282100  | -0.69651300 |
| C  | -3.47938400 | -1.70726900 | 0.17810700  |
| O  | -1.33303000 | -0.70016400 | 0.16901900  |
| H  | -0.16707200 | 5.84498600  | -1.67810900 |
| H  | -1.14059400 | 6.74269300  | -0.52128300 |
| C  | -4.83953200 | -1.52449600 | -0.00485600 |
| H  | -5.48708800 | -2.38554500 | 0.10089400  |
| O  | -0.12055700 | 0.60237800  | 2.44590700  |
| H  | -0.66531900 | -0.11975100 | 2.78862300  |
| C  | -2.88122000 | -3.07961300 | 0.52455200  |
| C  | -3.96509600 | -4.16448000 | 0.65076300  |
| H  | -3.49095300 | -5.11869700 | 0.89976200  |
| H  | -4.68562400 | -3.93669900 | 1.44368200  |
| H  | -4.51500800 | -4.30482300 | -0.28578600 |
| C  | -2.13961400 | -3.00093300 | 1.87938600  |
| H  | -1.31778200 | -2.28663000 | 1.83217300  |
| H  | -2.82718500 | -2.70159500 | 2.67826000  |
| H  | -1.72612400 | -3.98184300 | 2.13800300  |
| C  | -1.89829000 | -3.51852900 | -0.58454600 |
| H  | -2.41903700 | -3.60942900 | -1.54399400 |
| H  | -1.08626700 | -2.80179300 | -0.69386900 |
| H  | -1.46963300 | -4.49655400 | -0.33806700 |
| C  | 2.67722100  | -3.06796900 | -0.49409700 |
| C  | 1.79496700  | -3.01108000 | -1.76260900 |
| H  | 1.05193200  | -2.21772500 | -1.68561900 |
| H  | 2.41154900  | -2.83098600 | -2.65019300 |
| H  | 1.27438300  | -3.96551600 | -1.89949200 |
| C  | 1.80158900  | -3.38510600 | 0.74031500  |
| H  | 1.03119600  | -2.62851600 | 0.87863500  |
| H  | 1.31395300  | -4.35771500 | 0.60996000  |
| H  | 2.41647700  | -3.43270900 | 1.64577800  |
| C  | 3.67478200  | -4.22649400 | -0.66846800 |

|   |             |             |             |
|---|-------------|-------------|-------------|
| H | 4.30902600  | -4.09421500 | -1.55152900 |
| H | 4.32196900  | -4.34625700 | 0.20705400  |
| H | 3.12019100  | -5.16072100 | -0.79917100 |
| C | 7.01875800  | -0.41566500 | -0.22833000 |
| C | 7.61855500  | 0.98870500  | -0.05368100 |
| H | 7.29149600  | 1.66875900  | -0.84698900 |
| H | 7.34373100  | 1.42769100  | 0.91083300  |
| H | 8.71083500  | 0.93286900  | -0.09397700 |
| C | 7.48369200  | -0.97423600 | -1.59109800 |
| H | 8.57792400  | -1.00289900 | -1.64054900 |
| H | 7.11566300  | -1.99041600 | -1.75894400 |
| H | 7.11935800  | -0.34743300 | -2.41119500 |
| C | 7.55715400  | -1.31636000 | 0.90486400  |
| H | 7.19070500  | -2.34287500 | 0.81409100  |
| H | 8.65216300  | -1.34895300 | 0.88136000  |
| H | 7.24572400  | -0.93595200 | 1.88276000  |
| C | -6.97189400 | -0.22381900 | -0.51081800 |
| C | -7.45259900 | 1.19500700  | -0.85496900 |
| H | -7.20746400 | 1.90799000  | -0.06109900 |
| H | -7.01063500 | 1.55520800  | -1.78964700 |
| H | -8.53991100 | 1.19790900  | -0.97937300 |
| C | -7.66729400 | -0.66694000 | 0.79502500  |
| H | -8.75639300 | -0.63610000 | 0.67909000  |
| H | -7.39066800 | -1.68754800 | 1.07461600  |
| H | -7.39150600 | -0.00714600 | 1.62371600  |
| C | -7.38931000 | -1.16804900 | -1.65943700 |
| H | -7.10399600 | -2.20406700 | -1.45567100 |
| H | -8.47547200 | -1.14251800 | -1.80127700 |
| H | -6.91330700 | -0.86921400 | -2.59868200 |
| H | 0.30332000  | 3.47354900  | 1.48845900  |
| H | -0.09311600 | 3.26178700  | -1.51006700 |

### H<sub>2</sub>O-aCo<sup>III</sup>-OH

Charge: 0

Spin Multiplicity: 1

Sum of electronic and thermal Free Energies (a.u.): -1960.090547

No imaginary frequency

|    |             |             |             |
|----|-------------|-------------|-------------|
| C  | -4.74399700 | -1.59526500 | -0.07089800 |
| C  | -5.42441100 | -0.35428700 | -0.03972300 |
| C  | -3.36930100 | -1.74228500 | -0.16584300 |
| H  | -5.34647700 | -2.49299900 | -0.01850000 |
| C  | -4.64321600 | 0.77902300  | -0.11031900 |
| C  | -2.56127100 | -0.55337100 | -0.22583100 |
| C  | -3.23192300 | 0.70828800  | -0.19197200 |
| H  | -5.09493500 | 1.76570800  | -0.10095400 |
| O  | -1.25881900 | -0.66594400 | -0.30672000 |
| C  | -2.52277300 | 1.95245200  | -0.29311800 |
| Co | 0.01257000  | 0.70802100  | 0.01805800  |
| N  | -1.24222800 | 2.09721400  | -0.25328500 |
| H  | -3.14412500 | 2.84047800  | -0.41883700 |
| N  | 1.25915000  | 2.08689900  | 0.41079000  |
| C  | -0.55714600 | 3.37398500  | -0.46393600 |
| C  | 2.53976900  | 1.93268000  | 0.36807800  |
| C  | 0.60293600  | 3.39001100  | 0.55095100  |
| C  | -1.40775900 | 4.63896800  | -0.36502300 |
| H  | 3.17242300  | 2.81732300  | 0.45237300  |
| C  | 3.23656000  | 0.68779900  | 0.22370100  |
| C  | 1.48072600  | 4.62851800  | 0.37309300  |
| C  | -0.52622700 | 5.88466400  | -0.53736800 |
| H  | -1.90711100 | 4.66846800  | 0.61309600  |
| H  | -2.19143100 | 4.63289800  | -1.13000300 |
| C  | 4.63832700  | 0.75405300  | 0.05581100  |
| C  | 2.56472100  | -0.56776600 | 0.29368700  |
| C  | 0.62786600  | 5.90175200  | 0.47121600  |
| H  | 2.26982500  | 4.65146200  | 1.13230100  |
| H  | 1.97197600  | 4.58391000  | -0.60769600 |
| H  | -1.13649900 | 6.78790600  | -0.43286800 |
| H  | -0.11732800 | 5.89665900  | -1.55625600 |
| C  | 5.40639600  | -0.38534700 | -0.06778300 |

|   |             |             |             |
|---|-------------|-------------|-------------|
| H | 5.09442100  | 1.73794000  | 0.01791800  |
| C | 3.35224500  | -1.75873700 | 0.17176400  |
| O | 1.27038500  | -0.65446400 | 0.50356000  |
| H | 0.22074900  | 5.98641900  | 1.48777800  |
| H | 1.25893700  | 6.78243400  | 0.31225000  |
| C | 4.72203100  | -1.62076900 | -0.00280100 |
| H | 5.31379400  | -2.52174000 | -0.10142500 |
| O | -0.44813400 | 0.47943000  | 2.06446800  |
| O | 0.53203000  | 0.80290200  | -1.72573100 |
| H | 0.06519400  | 0.05459400  | -2.12439500 |
| C | -2.71070300 | -3.12969900 | -0.21633400 |
| C | -1.99035900 | -3.30184400 | -1.57266600 |
| H | -2.71327600 | -3.25627800 | -2.39426600 |
| H | -1.24305200 | -2.52376900 | -1.72168900 |
| H | -1.48918900 | -4.27509900 | -1.61416700 |
| C | -1.70440400 | -3.28401600 | 0.94716800  |
| H | -0.90798800 | -2.54582200 | 0.87699400  |
| H | -2.21595500 | -3.17395200 | 1.91099100  |
| H | -1.25049400 | -4.28052000 | 0.92210700  |
| C | -3.74092900 | -4.26577700 | -0.08856500 |
| H | -4.28532400 | -4.22203700 | 0.86092800  |
| H | -4.46989700 | -4.25453700 | -0.90552200 |
| H | -3.22002400 | -5.22736100 | -0.12690000 |
| C | 2.68717300  | -3.14272100 | 0.22801000  |
| C | 3.69987500  | -4.28351000 | 0.02440500  |
| H | 4.19882100  | -4.21829600 | -0.94810600 |
| H | 4.46684700  | -4.30025700 | 0.80614400  |
| H | 3.17206600  | -5.24157300 | 0.06072500  |
| C | 2.03082300  | -3.34919000 | 1.61157500  |
| H | 2.78552200  | -3.30622300 | 2.40458000  |
| H | 1.27810300  | -2.58596400 | 1.80494500  |
| H | 1.54513400  | -4.33031900 | 1.65715400  |
| C | 1.62539100  | -3.25423000 | -0.88819200 |
| H | 1.13572200  | -4.23355200 | -0.84413700 |
| H | 0.86755700  | -2.48052000 | -0.78566600 |
| H | 2.09580100  | -3.15439900 | -1.87230000 |
| C | 6.92577900  | -0.37049600 | -0.26841400 |
| C | 7.48725900  | 1.05980800  | -0.30871300 |
| H | 7.05927400  | 1.63773600  | -1.13413100 |
| H | 7.29106800  | 1.59673200  | 0.62516700  |
| H | 8.57189700  | 1.02878600  | -0.45212000 |
| C | 7.60688900  | -1.12496300 | 0.89419300  |
| H | 7.27139600  | -2.16437300 | 0.95292100  |
| H | 8.69477800  | -1.13193400 | 0.76286900  |
| H | 7.38000600  | -0.64630300 | 1.85218500  |
| C | 7.27423100  | -1.06478100 | -1.60311900 |
| H | 6.92924800  | -2.10258000 | -1.62040200 |
| H | 6.80574200  | -0.54363800 | -2.44382300 |
| H | 8.35849600  | -1.06993000 | -1.76204600 |
| C | -6.95334100 | -0.33118500 | 0.06242500  |
| C | -7.50750100 | 1.10242300  | 0.07740400  |
| H | -7.12935900 | 1.67235200  | 0.93237700  |
| H | -7.24945400 | 1.64420300  | -0.83832200 |
| H | -8.59913800 | 1.07758400  | 0.15170800  |
| C | -7.39258400 | -1.03349200 | 1.36577500  |
| H | -8.48490800 | -1.03507800 | 1.45220100  |
| H | -7.05405800 | -2.07307900 | 1.39852500  |
| H | -6.98024500 | -0.52006100 | 2.24025400  |
| C | -7.56170500 | -1.07244700 | -1.14808700 |
| H | -7.23026200 | -2.11383200 | -1.19273700 |
| H | -8.65581400 | -1.07244700 | -1.08830900 |
| H | -7.26892400 | -0.58862500 | -2.08521700 |
| H | 0.15288000  | 3.41102600  | 1.55455900  |
| H | -0.10733700 | 3.30012500  | -1.46298200 |
| H | -1.22433900 | -0.09982500 | 2.01613500  |
| H | 0.31102900  | -0.13804500 | 2.10657000  |

**H<sub>2</sub>O-aCo<sup>III</sup>-OH**

Charge: 0



Spin Multiplicity: 3

Sum of electronic and thermal Free Energies (a.u.): -1960.077484

No imaginary frequency

|    |             |             |             |
|----|-------------|-------------|-------------|
| C  | -4.70339900 | -1.62541900 | -0.08654800 |
| C  | -5.40351900 | -0.40049300 | 0.04220200  |
| C  | -3.33433900 | -1.74201900 | -0.25760000 |
| H  | -5.28681000 | -2.53612900 | -0.04642500 |
| C  | -4.64676300 | 0.74845400  | -0.00112500 |
| C  | -2.55121500 | -0.53490500 | -0.31510600 |
| C  | -3.23962400 | 0.71025100  | -0.16574300 |
| H  | -5.11204000 | 1.72398100  | 0.09400100  |
| O  | -1.25950700 | -0.62330400 | -0.49817500 |
| C  | -2.56026700 | 1.96797900  | -0.20889800 |
| Co | 0.03491800  | 0.73488700  | -0.28438800 |
| N  | -1.28017600 | 2.13841400  | -0.25523400 |
| H  | -3.20304200 | 2.84992800  | -0.20728800 |
| N  | 1.26972600  | 2.12076400  | 0.17283600  |
| C  | -0.63877100 | 3.44437800  | -0.42816200 |
| C  | 2.54832400  | 1.95573200  | 0.22416200  |
| C  | 0.61411800  | 3.40420500  | 0.45851700  |
| C  | -1.48838200 | 4.68111400  | -0.13922300 |
| H  | 3.17750900  | 2.83159100  | 0.38772700  |
| C  | 3.24044800  | 0.70441000  | 0.12439900  |
| C  | 1.46418900  | 4.66264200  | 0.27905000  |
| C  | -0.64275700 | 5.95103100  | -0.31701300 |
| H  | -1.87388900 | 4.62701500  | 0.88779600  |
| H  | -2.35272700 | 4.71797400  | -0.81054100 |
| C  | 4.64808500  | 0.75104800  | 0.00992300  |
| C  | 2.55307500  | -0.53749500 | 0.25092100  |
| C  | 0.61837400  | 5.91516000  | 0.55351700  |
| H  | 2.32373700  | 4.64917300  | 0.95687500  |
| H  | 1.85608800  | 4.68656400  | -0.74612100 |
| H  | -1.24472400 | 6.83389000  | -0.07773200 |
| H  | -0.35320000 | 6.04367000  | -1.37205400 |
| C  | 5.40783000  | -0.40003100 | -0.01355700 |
| H  | 5.11470500  | 1.72737200  | -0.06820400 |
| C  | 3.33291200  | -1.73943000 | 0.24873000  |
| O  | 1.24479500  | -0.59981800 | 0.39430900  |
| H  | 0.32806600  | 5.92710200  | 1.61258800  |
| H  | 1.22279700  | 6.81244200  | 0.38436500  |
| C  | 4.70898700  | -1.62257400 | 0.11019900  |
| H  | 5.29465100  | -2.53249100 | 0.09329700  |
| O  | -0.49887500 | 0.34220500  | 2.25599200  |
| O  | 0.52289900  | 0.85077900  | -2.07930400 |
| H  | 0.11085000  | 0.09129200  | -2.51668300 |
| C  | -2.65327800 | -3.11447100 | -0.36667800 |
| C  | -1.94449400 | -3.24366000 | -1.73389900 |
| H  | -2.67522300 | -3.17947200 | -2.54743700 |
| H  | -1.20212300 | -2.45876400 | -1.86957900 |
| H  | -1.44108400 | -4.21391600 | -1.80584500 |
| C  | -1.63599700 | -3.27169900 | 0.78591900  |
| H  | -0.87123700 | -2.49901300 | 0.74163800  |
| H  | -2.14632500 | -3.21652600 | 1.75455200  |
| H  | -1.14010500 | -4.24601000 | 0.72331200  |
| C  | -3.66042800 | -4.27286500 | -0.25676800 |
| H  | -4.18739800 | -4.27071000 | 0.70331200  |
| H  | -4.40440200 | -4.24901200 | -1.05999600 |
| H  | -3.12239300 | -5.22248300 | -0.33494000 |
| C  | 2.65580800  | -3.11261600 | 0.37320900  |
| C  | 3.66972600  | -4.26902600 | 0.31023300  |
| H  | 4.21521400  | -4.28475700 | -0.63904600 |
| H  | 4.39774700  | -4.22532200 | 1.12730600  |
| H  | 3.13373900  | -5.21914200 | 0.39746100  |
| C  | 1.92844700  | -3.21358700 | 1.73265500  |
| H  | 2.64362000  | -3.11648000 | 2.55665000  |
| H  | 1.17282400  | -2.43668500 | 1.83719400  |
| H  | 1.43393500  | -4.18674400 | 1.82508300  |
| C  | 1.65910800  | -3.30249800 | -0.79177000 |
| H  | 1.15907900  | -4.27344700 | -0.70494800 |

|   |             |             |             |
|---|-------------|-------------|-------------|
| H | 0.90219600  | -2.52115600 | -0.79411800 |
| H | 2.18824700  | -3.27864700 | -1.75051400 |
| C | 6.93329500  | -0.41063800 | -0.15974100 |
| C | 7.51032200  | 1.00949600  | -0.27331300 |
| H | 7.11668200  | 1.53597800  | -1.14872100 |
| H | 7.28865500  | 1.60765500  | 0.61661700  |
| H | 8.59873000  | 0.96017000  | -0.37691200 |
| C | 7.56427500  | -1.09263200 | 1.07375900  |
| H | 7.21691400  | -2.12349200 | 1.18790700  |
| H | 8.65591400  | -1.11625500 | 0.98250100  |
| H | 7.30819900  | -0.55058000 | 1.98965400  |
| C | 7.32068500  | -1.19417500 | -1.43285400 |
| H | 6.96590300  | -2.22811800 | -1.39441000 |
| H | 6.88792700  | -0.72567500 | -2.32226300 |
| H | 8.40968900  | -1.21852400 | -1.55182300 |
| C | -6.92520400 | -0.41422400 | 0.22100500  |
| C | -7.50317100 | 1.00502100  | 0.33969300  |
| H | -7.09467400 | 1.53614500  | 1.20558300  |
| H | -7.29934500 | 1.59983100  | -0.55660200 |
| H | -8.58926200 | 0.95388100  | 0.46408300  |
| C | -7.28515200 | -1.19302600 | 1.50507300  |
| H | -8.37146700 | -1.22078000 | 1.64508700  |
| H | -6.92791600 | -2.22610800 | 1.46529900  |
| H | -6.83795200 | -0.71833100 | 2.38418300  |
| C | -7.57909800 | -1.10355000 | -0.99645300 |
| H | -7.23100800 | -2.13388800 | -1.11321000 |
| H | -8.66853000 | -1.13002200 | -0.88281900 |
| H | -7.34316400 | -0.56477300 | -1.91953800 |
| H | 0.26744300  | 3.34757600  | 1.50092000  |
| H | -0.29598300 | 3.47024000  | -1.47225900 |
| H | -1.23548500 | -0.25192800 | 2.05943900  |
| H | 0.28344000  | -0.17249800 | 1.98598600  |

### H<sub>2</sub>O-aCo<sup>III</sup>-OH

Charge: 0

Spin Multiplicity: 5

Sum of electronic and thermal Free Energies (a.u.): -1960.080677

No imaginary frequency

|    |             |             |             |
|----|-------------|-------------|-------------|
| C  | -4.81927800 | -1.57231000 | 0.14550200  |
| C  | -5.50579200 | -0.35536800 | -0.08329500 |
| C  | -3.44150200 | -1.69571600 | 0.24214500  |
| H  | -5.41850300 | -2.46706700 | 0.25400800  |
| C  | -4.73412900 | 0.78024600  | -0.21765300 |
| C  | -2.65239900 | -0.50889400 | 0.08864900  |
| C  | -3.32240500 | 0.72961800  | -0.14803900 |
| H  | -5.19487000 | 1.74755900  | -0.38895200 |
| O  | -1.34814100 | -0.58105400 | 0.20413300  |
| C  | -2.61537100 | 1.97247900  | -0.28113100 |
| Co | 0.01093000  | 0.58075500  | -0.56359600 |
| N  | -1.33213600 | 2.11258900  | -0.35821700 |
| H  | -3.25068200 | 2.86153700  | -0.31795600 |
| N  | 1.23683000  | 2.05826200  | 0.17618900  |
| C  | -0.66835400 | 3.41309700  | -0.44022200 |
| C  | 2.51614200  | 1.91855200  | 0.30722200  |
| C  | 0.55161700  | 3.31508600  | 0.50277600  |
| C  | -1.51823400 | 4.64538100  | -0.12651800 |
| H  | 3.11599400  | 2.78868200  | 0.58499500  |
| C  | 3.26827300  | 0.70612100  | 0.13363500  |
| C  | 1.39861200  | 4.58963800  | 0.45005800  |
| C  | -0.66511200 | 5.91923800  | -0.18661200 |
| H  | -1.95508600 | 4.53660100  | 0.87540000  |
| H  | -2.34952000 | 4.72323500  | -0.83535800 |
| C  | 4.67827400  | 0.81301700  | 0.15850000  |
| C  | 2.64233800  | -0.56982000 | 0.00527400  |
| C  | 0.54096700  | 5.82574600  | 0.75325100  |
| H  | 2.21958000  | 4.53487700  | 1.17207100  |
| H  | 1.84924800  | 4.67924500  | -0.54766800 |
| H  | -1.27955200 | 6.78969200  | 0.06634200  |
| H  | -0.31383000 | 6.07071700  | -1.21605000 |

|   |             |             |             |
|---|-------------|-------------|-------------|
| C | 5.49073400  | -0.29486000 | 0.02861500  |
| H | 5.10566300  | 1.80299200  | 0.27866900  |
| C | 3.47218700  | -1.72925300 | -0.13384300 |
| O | 1.33724400  | -0.70173900 | 0.04744600  |
| H | 0.18781400  | 5.77221800  | 1.79165500  |
| H | 1.15534100  | 6.72909500  | 0.67732100  |
| C | 4.84691900  | -1.54658200 | -0.12020000 |
| H | 5.47707500  | -2.42013500 | -0.22737800 |
| O | 0.04594500  | 0.15088500  | 2.57453100  |
| O | 0.14247800  | 0.41826300  | -2.34492300 |
| H | 0.58974600  | -0.38803400 | -2.63805700 |
| C | -2.76486900 | -3.05017500 | 0.51232000  |
| C | -1.76540500 | -3.38231500 | -0.61880500 |
| H | -2.27621600 | -3.41943100 | -1.58725700 |
| H | -0.97236700 | -2.63921400 | -0.66860600 |
| H | -1.31126100 | -4.36281000 | -0.43707100 |
| C | -2.02400600 | -3.00495200 | 1.86866600  |
| H | -1.25331300 | -2.23547300 | 1.88426200  |
| H | -2.72714200 | -2.80641500 | 2.68470900  |
| H | -1.54482000 | -3.97090100 | 2.06355100  |
| C | -3.78861100 | -4.19754600 | 0.58044500  |
| H | -4.50732100 | -4.06128000 | 1.39539700  |
| H | -4.34468000 | -4.30675700 | -0.35678800 |
| H | -3.26071400 | -5.13836600 | 0.76308100  |
| C | 2.83717200  | -3.11750100 | -0.31281000 |
| C | 3.89965500  | -4.22264000 | -0.44615200 |
| H | 4.54694900  | -4.06927400 | -1.31616300 |
| H | 4.53062000  | -4.29285300 | 0.44608700  |
| H | 3.40011100  | -5.18777100 | -0.57330400 |
| C | 1.95027800  | -3.46259600 | 0.90551300  |
| H | 2.54629100  | -3.46884100 | 1.82442600  |
| H | 1.13958100  | -2.74502200 | 1.01997700  |
| H | 1.51501500  | -4.46007600 | 0.77829300  |
| C | 1.98552600  | -3.12993400 | -1.60329700 |
| H | 1.53043500  | -4.11599400 | -1.74585700 |
| H | 1.18401600  | -2.39351100 | -1.54712200 |
| H | 2.60906500  | -2.91367300 | -2.47780700 |
| C | 7.02210600  | -0.23054100 | 0.03942100  |
| C | 7.53727400  | 1.20735200  | 0.21178700  |
| H | 7.20576800  | 1.85589800  | -0.60561600 |
| H | 7.20179800  | 1.64585900  | 1.15719600  |
| H | 8.63161000  | 1.21059400  | 0.21475800  |
| C | 7.56346600  | -1.08231100 | 1.20837700  |
| H | 7.25876700  | -2.12916500 | 1.12158500  |
| H | 8.65853700  | -1.05378800 | 1.22781500  |
| H | 7.19322100  | -0.70501200 | 2.16677800  |
| C | 7.56877800  | -0.78409800 | -1.29466200 |
| H | 7.26441400  | -1.82199000 | -1.45741900 |
| H | 7.20244000  | -0.19190500 | -2.13917800 |
| H | 8.66390000  | -0.75230400 | -1.30229600 |
| C | -7.03614900 | -0.35708400 | -0.16732000 |
| C | -7.60114400 | 1.05065400  | -0.41572900 |
| H | -7.33606800 | 1.74044100  | 0.39214200  |
| H | -7.23878100 | 1.47031100  | -1.35975400 |
| H | -8.69333800 | 1.00721200  | -0.46952700 |
| C | -7.62368200 | -0.88754900 | 1.15875100  |
| H | -8.71829300 | -0.90224800 | 1.11372200  |
| H | -7.28528100 | -1.90523500 | 1.37321900  |
| H | -7.32322000 | -0.25188200 | 1.99762600  |
| C | -7.48461000 | -1.27084700 | -1.32878200 |
| H | -7.14102800 | -2.29988300 | -1.18979700 |
| H | -8.57772400 | -1.29042800 | -1.40064600 |
| H | -7.08418900 | -0.91079700 | -2.28168500 |
| H | 0.15572400  | 3.18617200  | 1.52089000  |
| H | -0.27700400 | 3.50225300  | -1.46510500 |
| H | -0.73329500 | -0.08541200 | 2.04866800  |
| H | 0.74558300  | -0.25940700 | 2.04455000  |

PO-aCo<sup>III</sup>-OH

Charge: 0

Spin Multiplicity: 1

Sum of electronic and thermal Free Energies (a.u.): -2076.737918

No imaginary frequency

|    |             |             |             |
|----|-------------|-------------|-------------|
| C  | -4.65784500 | -1.55187200 | -0.29126900 |
| C  | -5.31407500 | -0.31316700 | -0.09320900 |
| C  | -3.29917800 | -1.70141700 | -0.52179600 |
| H  | -5.26874300 | -2.44507000 | -0.26801500 |
| C  | -4.53019600 | 0.81805800  | -0.17717900 |
| C  | -2.47425300 | -0.52023300 | -0.51324500 |
| C  | -3.13304700 | 0.74302700  | -0.38267800 |
| H  | -4.96904100 | 1.80585000  | -0.07883000 |
| O  | -1.17944300 | -0.63862100 | -0.63061300 |
| C  | -2.42678100 | 1.98608500  | -0.52141300 |
| Co | 0.08934700  | 0.72281100  | -0.22816900 |
| N  | -1.14616100 | 2.11807700  | -0.55761200 |
| H  | -3.04941900 | 2.87746700  | -0.61754900 |
| N  | 1.32440300  | 2.10036400  | 0.20043300  |
| C  | -0.44655400 | 3.37968400  | -0.78372100 |
| C  | 2.60436900  | 1.92920700  | 0.24057200  |
| C  | 0.68079200  | 3.41573400  | 0.26916800  |
| C  | -1.28480800 | 4.65530500  | -0.75118200 |
| H  | 3.24226900  | 2.80742600  | 0.35135400  |
| C  | 3.29229300  | 0.67739500  | 0.14882200  |
| C  | 1.58008700  | 4.63641900  | 0.07398600  |
| C  | -0.38286400 | 5.88267100  | -0.94669700 |
| H  | -1.80593500 | 4.72865300  | 0.21335300  |
| H  | -2.05148300 | 4.62607700  | -1.53296100 |
| C  | 4.70566700  | 0.72718700  | 0.09772000  |
| C  | 2.59959100  | -0.57299500 | 0.13627400  |
| C  | 0.74249400  | 5.92360400  | 0.09378600  |
| H  | 2.34407900  | 4.68156100  | 0.85760800  |
| H  | 2.10336400  | 4.54528500  | -0.88666800 |
| H  | -0.98238500 | 6.79763300  | -0.89404700 |
| H  | 0.05473100  | 5.84974800  | -1.95308500 |
| C  | 5.46927500  | -0.41683500 | 0.01193300  |
| H  | 5.17365800  | 1.70621400  | 0.11851200  |
| C  | 3.38871000  | -1.77097800 | 0.03825900  |
| O  | 1.30191100  | -0.65747100 | 0.25042200  |
| H  | 0.30666300  | 6.05511300  | 1.09352800  |
| H  | 1.39080300  | 6.78873400  | -0.08094200 |
| C  | 4.76737900  | -1.64613000 | -0.01700700 |
| H  | 5.35564600  | -2.55164100 | -0.09510100 |
| C  | -0.92885300 | -0.49262400 | 2.39503000  |
| C  | 0.21182700  | 0.31053800  | 2.84974600  |
| O  | -0.60702300 | 0.77322600  | 1.74335100  |
| H  | -0.69326200 | -1.33437800 | 1.75455500  |
| H  | 1.21228600  | 0.01194000  | 2.55539100  |
| H  | 0.11704200  | 0.93146600  | 3.73746600  |
| C  | -2.25906900 | -0.52502100 | 3.08908900  |
| H  | -3.06245900 | -0.61093000 | 2.35187300  |
| H  | -2.31044600 | -1.39421700 | 3.75329900  |
| H  | -2.41759900 | 0.38034400  | 3.68164700  |
| O  | 0.68523400  | 0.79831000  | -1.95281000 |
| H  | 0.21050500  | 0.06611100  | -2.37098800 |
| C  | -2.68392800 | -3.08363600 | -0.79778700 |
| C  | -2.01425700 | -3.07369800 | -2.19110700 |
| H  | -2.75790800 | -2.87963400 | -2.97141900 |
| H  | -1.24083400 | -2.30828000 | -2.24641800 |
| H  | -1.55343200 | -4.04676400 | -2.39435300 |
| C  | -1.63506800 | -3.43756000 | 0.27768900  |
| H  | -0.80432600 | -2.73698500 | 0.24888600  |
| H  | -2.08607700 | -3.42503100 | 1.27675900  |
| H  | -1.23927000 | -4.44380500 | 0.10154700  |
| C  | -3.74370300 | -4.19965000 | -0.79808600 |
| H  | -4.23485900 | -4.30139100 | 0.17577000  |
| H  | -4.51458700 | -4.03482200 | -1.55798200 |
| H  | -3.25792300 | -5.15421000 | -1.02233800 |
| C  | 2.70420300  | -3.14493400 | -0.01323300 |

|   |             |             |             |
|---|-------------|-------------|-------------|
| C | 3.71449500  | -4.29418600 | -0.17671800 |
| H | 4.29201300  | -4.20196900 | -1.10242900 |
| H | 4.41506100  | -4.35145400 | 0.66332900  |
| H | 3.17277300  | -5.24433900 | -0.21874000 |
| C | 1.93639100  | -3.38960600 | 1.30540300  |
| H | 2.63180000  | -3.41420400 | 2.15196000  |
| H | 1.20501100  | -2.60247800 | 1.48055600  |
| H | 1.41203300  | -4.35096700 | 1.26823200  |
| C | 1.73993000  | -3.19760800 | -1.22030500 |
| H | 1.22946600  | -4.16678900 | -1.25235700 |
| H | 0.99167800  | -2.40968500 | -1.16181700 |
| H | 2.29878900  | -3.07744200 | -2.15455200 |
| C | 7.00005800  | -0.41709300 | -0.05884100 |
| C | 7.57883300  | 1.00605900  | -0.01071000 |
| H | 7.23010600  | 1.61150200  | -0.85350700 |
| H | 7.30794800  | 1.52033900  | 0.91725400  |
| H | 8.67149000  | 0.96468200  | -0.06083800 |
| C | 7.57171000  | -1.21179300 | 1.13552200  |
| H | 7.21968500  | -2.24738300 | 1.13703400  |
| H | 8.66673500  | -1.23108700 | 1.09645800  |
| H | 7.27022900  | -0.75539500 | 2.08383600  |
| C | 7.45432200  | -1.07918700 | -1.37800300 |
| H | 7.10077100  | -2.11142000 | -1.45414600 |
| H | 7.06491100  | -0.52912000 | -2.24034000 |
| H | 8.54814800  | -1.09452200 | -1.44428500 |
| C | -6.82228000 | -0.28894400 | 0.17590300  |
| C | -7.35174000 | 1.14287000  | 0.35514300  |
| H | -6.86871200 | 1.64862400  | 1.19758300  |
| H | -7.19374900 | 1.74680900  | -0.54426100 |
| H | -8.42781100 | 1.11908300  | 0.55387300  |
| C | -7.12231700 | -1.08076400 | 1.46748300  |
| H | -8.19803000 | -1.08550800 | 1.67644100  |
| H | -6.79266000 | -2.12075600 | 1.38830100  |
| H | -6.60868300 | -0.63184400 | 2.32389200  |
| C | -7.57301200 | -0.93741800 | -1.00754400 |
| H | -7.26494500 | -1.97538500 | -1.16226400 |
| H | -8.65369400 | -0.93359400 | -0.82606900 |
| H | -7.37861600 | -0.38992300 | -1.93514600 |
| H | 0.19409800  | 3.48382800  | 1.25428800  |
| H | 0.03600400  | 3.27042500  | -1.76393400 |

**PO-aCo<sup>III</sup>-OH**

Charge: 0

Spin Multiplicity: 3

Sum of electronic and thermal Free Energies (a.u.): -2076.723971

No imaginary frequency

|    |             |             |             |
|----|-------------|-------------|-------------|
| C  | -4.61717400 | -1.57653900 | -0.28650600 |
| C  | -5.27562500 | -0.35702200 | 0.00701100  |
| C  | -3.27459000 | -1.69717900 | -0.60404800 |
| H  | -5.21449000 | -2.47873900 | -0.26384000 |
| C  | -4.51184200 | 0.78674800  | -0.06668200 |
| C  | -2.46572700 | -0.50395800 | -0.60482700 |
| C  | -3.12861100 | 0.74197400  | -0.36545300 |
| H  | -4.95271300 | 1.76179400  | 0.11318700  |
| O  | -1.18301600 | -0.60248800 | -0.82337300 |
| C  | -2.44603300 | 1.99731500  | -0.45553800 |
| Co | 0.12981000  | 0.73806400  | -0.53143200 |
| N  | -1.17194600 | 2.15239300  | -0.58282300 |
| H  | -3.08117500 | 2.88458100  | -0.42286100 |
| N  | 1.35100600  | 2.11855900  | -0.02280200 |
| C  | -0.50856000 | 3.44042000  | -0.77220700 |
| C  | 2.61979900  | 1.93795800  | 0.12925700  |
| C  | 0.69900900  | 3.41988300  | 0.17912400  |
| C  | -1.35349100 | 4.69741000  | -0.57714600 |
| H  | 3.24625100  | 2.80680700  | 0.33640300  |
| C  | 3.30447300  | 0.68140900  | 0.07471000  |
| C  | 1.57425200  | 4.65972000  | -0.01279500 |
| C  | -0.48185400 | 5.94636500  | -0.77450600 |
| H  | -1.78305400 | 4.69908300  | 0.43393200  |

|   |             |             |             |
|---|-------------|-------------|-------------|
| H | -2.18840800 | 4.70860900  | -1.28599400 |
| C | 4.71808300  | 0.71629000  | 0.10088000  |
| C | 2.59788200  | -0.55891900 | 0.07984600  |
| C | 0.73439100  | 5.93471600  | 0.15865900  |
| H | 2.39833500  | 4.66936200  | 0.70791900  |
| H | 2.01836400  | 4.62956600  | -1.01611900 |
| H | -1.07989500 | 6.84842500  | -0.60742400 |
| H | -0.13954600 | 5.98338200  | -1.81699900 |
| C | 5.47007400  | -0.43901500 | 0.10188200  |
| H | 5.19602800  | 1.69039100  | 0.10991800  |
| C | 3.37310300  | -1.76841000 | 0.08806200  |
| O | 1.28944100  | -0.62312200 | 0.10533300  |
| H | 0.39146300  | 6.00120700  | 1.20006900  |
| H | 1.36035800  | 6.81507700  | -0.02129200 |
| C | 4.75503200  | -1.66003400 | 0.09367300  |
| H | 5.33435700  | -2.57435900 | 0.08752000  |
| C | -1.02995800 | -0.45124600 | 2.35946500  |
| C | 0.16165100  | 0.21918000  | 2.89174900  |
| O | -0.63804300 | 0.85561200  | 1.87357000  |
| H | -0.85730200 | -1.22731800 | 1.62093300  |
| H | 1.14422300  | -0.09818400 | 2.55362800  |
| H | 0.11423700  | 0.70450400  | 3.86557700  |
| C | -2.34428800 | -0.50973000 | 3.08640900  |
| H | -3.17147700 | -0.44993500 | 2.37246500  |
| H | -2.43356800 | -1.45610100 | 3.63065400  |
| H | -2.43548200 | 0.31499000  | 3.79927700  |
| O | 0.67105800  | 0.89067900  | -2.32549100 |
| H | 0.28134800  | 0.13366300  | -2.78624700 |
| C | -2.65555400 | -3.06332800 | -0.94140200 |
| C | -2.01882300 | -3.01587700 | -2.34925500 |
| H | -2.78015400 | -2.79993300 | -3.10657000 |
| H | -1.24511500 | -2.25096600 | -2.40373700 |
| H | -1.56744800 | -3.98517800 | -2.58829000 |
| C | -1.58197200 | -3.42688700 | 0.10515700  |
| H | -0.77370600 | -2.69998200 | 0.09603100  |
| H | -2.01914500 | -3.46579600 | 1.10939400  |
| H | -1.15725200 | -4.41239900 | -0.11492800 |
| C | -3.70436400 | -4.18969500 | -0.94510300 |
| H | -4.16418100 | -4.32863800 | 0.03922900  |
| H | -4.49966800 | -4.00851700 | -1.67575000 |
| H | -3.21612700 | -5.13129000 | -1.21417900 |
| C | 2.67669700  | -3.13669300 | 0.06827500  |
| C | 3.68129400  | -4.30225000 | 0.03626400  |
| H | 4.31475900  | -4.27311200 | -0.85640800 |
| H | 4.32865000  | -4.31405900 | 0.91968000  |
| H | 3.13094400  | -5.24810000 | 0.01894000  |
| C | 1.82311700  | -3.29901200 | 1.34601900  |
| H | 2.46406100  | -3.28344700 | 2.23469000  |
| H | 1.09163300  | -2.49783000 | 1.43313300  |
| H | 1.29047300  | -4.25613400 | 1.32861600  |
| C | 1.79699100  | -3.24759900 | -1.19820900 |
| H | 1.28163800  | -4.21423300 | -1.21554900 |
| H | 1.05203700  | -2.45495800 | -1.23447700 |
| H | 2.42070600  | -3.17972600 | -2.09600500 |
| C | 7.00231000  | -0.45840000 | 0.10844400  |
| C | 7.59570600  | 0.95943900  | 0.12318200  |
| H | 7.29616400  | 1.53096700  | -0.76116400 |
| H | 7.28704600  | 1.51674000  | 1.01374800  |
| H | 8.68880100  | 0.90420400  | 0.12855300  |
| C | 7.50319100  | -1.20563100 | 1.36364500  |
| H | 7.13951800  | -2.23676800 | 1.39230400  |
| H | 8.59838200  | -1.23709600 | 1.38051300  |
| H | 7.16035800  | -0.70513100 | 2.27489300  |
| C | 7.51194500  | -1.18315300 | -1.15642900 |
| H | 7.14978600  | -2.21407900 | -1.20467700 |
| H | 7.17269700  | -0.66781700 | -2.06039000 |
| H | 8.60732200  | -1.21260700 | -1.16723200 |
| C | -6.76421500 | -0.36816800 | 0.36862900  |
| C | -7.29905900 | 1.04580400  | 0.64599400  |

|   |             |             |             |
|---|-------------|-------------|-------------|
| H | -6.77247800 | 1.51922200  | 1.48105100  |
| H | -7.20300300 | 1.69275400  | -0.23200100 |
| H | -8.36072500 | 0.99661100  | 0.90726400  |
| C | -6.97308300 | -1.22242200 | 1.63827400  |
| H | -8.03353100 | -1.25206900 | 1.91263700  |
| H | -6.63709300 | -2.25291100 | 1.49105800  |
| H | -6.41222900 | -0.80553900 | 2.48108700  |
| C | -7.57756200 | -0.97396700 | -0.79585500 |
| H | -7.26599400 | -1.99872100 | -1.01739000 |
| H | -8.64474000 | -0.99588200 | -0.54829900 |
| H | -7.44864300 | -0.38149500 | -1.70709600 |
| H | 0.29755100  | 3.41345800  | 1.20336500  |
| H | -0.11265400 | 3.41680600  | -1.79691500 |

**PO-aCo<sup>III</sup>-OH**

Charge: 0

Spin Multiplicity: 5

Sum of electronic and thermal Free Energies (a.u.): -2076.724621

No imaginary frequency

|    |             |             |             |
|----|-------------|-------------|-------------|
| C  | -4.75817800 | -1.53114800 | -0.13642800 |
| C  | -5.35605400 | -0.27093000 | 0.11166800  |
| C  | -3.43003100 | -1.71748500 | -0.48237200 |
| H  | -5.39009100 | -2.40607100 | -0.05176900 |
| C  | -4.55091800 | 0.83824600  | -0.04139400 |
| C  | -2.58091100 | -0.55827200 | -0.55718000 |
| C  | -3.18069200 | 0.72882800  | -0.37805200 |
| H  | -4.95186600 | 1.83639600  | 0.10228100  |
| O  | -1.30779000 | -0.71384900 | -0.76681400 |
| C  | -2.45683800 | 1.95991600  | -0.53487300 |
| Co | 0.15538700  | 0.55342500  | -0.82118800 |
| N  | -1.19685900 | 2.08630900  | -0.78996500 |
| H  | -3.06818600 | 2.86003800  | -0.42785200 |
| N  | 1.32081300  | 2.07413700  | -0.01846200 |
| C  | -0.52502100 | 3.37949300  | -0.88558200 |
| C  | 2.58459400  | 1.93404300  | 0.20212300  |
| C  | 0.62272500  | 3.35108400  | 0.15241600  |
| C  | -1.38592100 | 4.63187100  | -0.71520000 |
| H  | 3.18130000  | 2.81303200  | 0.46243200  |
| C  | 3.32831100  | 0.70184000  | 0.14238000  |
| C  | 1.48258800  | 4.61552300  | 0.05764900  |
| C  | -0.52088100 | 5.89320200  | -0.83429900 |
| H  | -1.87035300 | 4.61541500  | 0.27049500  |
| H  | -2.18245100 | 4.64461900  | -1.46731900 |
| C  | 4.73508500  | 0.79638000  | 0.24430600  |
| C  | 2.69407400  | -0.57372200 | 0.03623500  |
| C  | 0.61939600  | 5.87810300  | 0.18906100  |
| H  | 2.24872900  | 4.61894400  | 0.84004800  |
| H  | 2.00663400  | 4.61680500  | -0.90743900 |
| H  | -1.14104100 | 6.78590100  | -0.69995900 |
| H  | -0.10144400 | 5.95044800  | -1.84749900 |
| C  | 5.54298700  | -0.32259800 | 0.21423500  |
| H  | 5.16606300  | 1.78790100  | 0.33795800  |
| C  | 3.52107300  | -1.74538600 | 0.01466200  |
| O  | 1.39106700  | -0.69480100 | -0.01109600 |
| H  | 0.19560200  | 5.92029300  | 1.20158700  |
| H  | 1.24744700  | 6.76820700  | 0.07550400  |
| C  | 4.89488000  | -1.57480300 | 0.09647300  |
| H  | 5.51997900  | -2.45830300 | 0.07166000  |
| C  | -0.92566600 | -0.47475200 | 2.30540100  |
| C  | 0.24190100  | 0.28556600  | 2.76700200  |
| O  | -0.61538500 | 0.81750800  | 1.73955300  |
| H  | -0.73266800 | -1.28212000 | 1.60597800  |
| H  | 1.23236700  | 0.00056500  | 2.42239400  |
| H  | 0.19457800  | 0.81987900  | 3.71537700  |
| C  | -2.21608400 | -0.55848700 | 3.07300500  |
| H  | -3.06437900 | -0.57622600 | 2.38190100  |
| H  | -2.24501400 | -1.47714200 | 3.66904000  |
| H  | -2.32897400 | 0.29842000  | 3.74365500  |
| O  | 0.68481600  | 0.53238300  | -2.55585300 |

|   |             |             |             |
|---|-------------|-------------|-------------|
| H | 1.11238700  | -0.30245300 | -2.79566100 |
| C | -2.86209300 | -3.11208300 | -0.79517500 |
| C | -2.31237800 | -3.12421800 | -2.24053600 |
| H | -3.11389900 | -2.91986100 | -2.95829300 |
| H | -1.53255800 | -2.37279600 | -2.36661600 |
| H | -1.89102400 | -4.10892600 | -2.47291300 |
| C | -1.72722500 | -3.47863400 | 0.18694200  |
| H | -0.88585300 | -2.79690000 | 0.07945000  |
| H | -2.08362700 | -3.44555100 | 1.22269500  |
| H | -1.37386700 | -4.49647500 | -0.01349000 |
| C | -3.93881500 | -4.20664100 | -0.69257800 |
| H | -4.34542900 | -4.28917400 | 0.32122600  |
| H | -4.76942700 | -4.03155000 | -1.38424100 |
| H | -3.49428400 | -5.17328900 | -0.94846400 |
| C | 2.88031300  | -3.13879000 | -0.08756400 |
| C | 3.93650200  | -4.25621100 | -0.14943300 |
| H | 4.58928000  | -4.15483300 | -1.02297300 |
| H | 4.56283500  | -4.28065500 | 0.74848600  |
| H | 3.43184000  | -5.22430200 | -0.22426400 |
| C | 2.00154200  | -3.39121000 | 1.15873300  |
| H | 2.61404900  | -3.38065800 | 2.06697100  |
| H | 1.22886400  | -2.62909300 | 1.25072400  |
| H | 1.51632000  | -4.37102800 | 1.08731200  |
| C | 2.01935400  | -3.24086100 | -1.36843300 |
| H | 1.59373200  | -4.24685800 | -1.45324000 |
| H | 1.19988100  | -2.52363400 | -1.35133400 |
| H | 2.63361800  | -3.05932800 | -2.25766100 |
| C | 7.07238300  | -0.26893000 | 0.30165000  |
| C | 7.59257100  | 1.17191300  | 0.42841300  |
| H | 7.30930400  | 1.78077100  | -0.43619400 |
| H | 7.21316000  | 1.66014900  | 1.33200200  |
| H | 8.68539800  | 1.16751900  | 0.48774300  |
| C | 7.54615900  | -1.06459200 | 1.53756400  |
| H | 7.23521100  | -2.11205000 | 1.48790500  |
| H | 8.63918500  | -1.04382700 | 1.61161500  |
| H | 7.13197000  | -0.63638400 | 2.45590900  |
| C | 7.68151100  | -0.89262200 | -0.97311200 |
| H | 7.37475000  | -1.93487200 | -1.09941700 |
| H | 7.36406900  | -0.34085900 | -1.86350400 |
| H | 8.77602300  | -0.86963400 | -0.92646300 |
| C | -6.83290200 | -0.20205400 | 0.51448100  |
| C | -7.30308000 | 1.24452700  | 0.73550700  |
| H | -6.73368300 | 1.73631700  | 1.53088300  |
| H | -7.20776800 | 1.84349300  | -0.17594300 |
| H | -8.35768100 | 1.25141200  | 1.02828200  |
| C | -7.03859100 | -0.98368900 | 1.83061200  |
| H | -8.09071300 | -0.95499400 | 2.13560100  |
| H | -6.74964400 | -2.03342700 | 1.72576500  |
| H | -6.43598800 | -0.55034700 | 2.63540400  |
| C | -7.70414600 | -0.82975000 | -0.59532000 |
| H | -7.44039500 | -1.87610800 | -0.77387700 |
| H | -8.76362700 | -0.79534200 | -0.31770500 |
| H | -7.57846300 | -0.28834900 | -1.53823500 |
| H | 0.14369200  | 3.31006500  | 1.14156000  |
| H | -0.05780300 | 3.40532900  | -1.88067400 |

**LanL2TZ(f) basis set for Co and 6-311G(d,p) for all non-metal C, H, O, N and S**

PO-Co<sup>III</sup>-Cl + H<sub>2</sub>O-Co<sup>III</sup>-OH

Charge: 0

Spin Multiplicity: 1

Sum of electronic and thermal Free Energies (a.u.): -3164.416210

Thermal correction to Gibbs Free Energy (a.u.): 0.777242

No imaginary frequency

Calculation of single point energy based on the optimized structure, Er = -5640.9971787 a.u.

|   |            |             |             |
|---|------------|-------------|-------------|
| C | 5.98768300 | -3.24918500 | -3.03410200 |
|---|------------|-------------|-------------|



|    |             |             |             |
|----|-------------|-------------|-------------|
| C  | 5.29305100  | -4.25086500 | -2.33447700 |
| C  | 5.87089500  | -1.92014000 | -2.68255000 |
| H  | 6.62324600  | -3.52241900 | -3.86975600 |
| C  | 4.49226800  | -3.88194100 | -1.27565800 |
| H  | 5.38782900  | -5.29030000 | -2.62152400 |
| C  | 5.04538400  | -1.51011900 | -1.60671000 |
| H  | 6.39893000  | -1.14453500 | -3.22355600 |
| C  | 4.34875200  | -2.53165700 | -0.88912300 |
| H  | 3.94837300  | -4.63663800 | -0.71609700 |
| O  | 4.98436900  | -0.23942100 | -1.31730300 |
| C  | 3.51952800  | -2.24453200 | 0.24409100  |
| Co | 3.67766000  | 0.56257200  | -0.18309000 |
| N  | 3.25914800  | -1.07693000 | 0.71587800  |
| H  | 3.07333300  | -3.11093100 | 0.73319200  |
| N  | 2.51222600  | 1.37165300  | 1.08374400  |
| C  | 2.29450200  | -0.90140100 | 1.81848800  |
| C  | 1.86318400  | 2.46448400  | 0.90143100  |
| C  | 2.42431700  | 0.54993200  | 2.29108200  |
| C  | 2.47769900  | -1.83805600 | 3.01581000  |
| H  | 1.13434900  | 2.77798600  | 1.64472700  |
| C  | 2.03867300  | 3.32997800  | -0.22996100 |
| C  | 1.33380300  | 0.88095800  | 3.30175900  |
| C  | 1.43463800  | -1.52090600 | 4.09939000  |
| H  | 3.49135800  | -1.70592500 | 3.41138400  |
| H  | 2.39168500  | -2.88414600 | 2.71352900  |
| C  | 1.12084400  | 4.38311000  | -0.41472500 |
| C  | 3.15030800  | 3.17751600  | -1.11675100 |
| C  | 1.47256000  | -0.04735100 | 4.51625300  |
| H  | 1.41752800  | 1.92240400  | 3.62566700  |
| H  | 0.35298500  | 0.74362100  | 2.83579500  |
| H  | 1.59933700  | -2.16556800 | 4.96709700  |
| H  | 0.43397100  | -1.74832700 | 3.72009900  |
| C  | 1.25271900  | 5.27151300  | -1.46238900 |
| H  | 0.28820000  | 4.47063500  | 0.27470900  |
| C  | 3.26350100  | 4.11075000  | -2.17364800 |
| O  | 4.07142300  | 2.25937400  | -0.97753400 |
| H  | 2.41769400  | 0.16713100  | 5.02997200  |
| H  | 0.66977900  | 0.15789700  | 5.22873000  |
| C  | 2.33817800  | 5.12431500  | -2.34044700 |
| H  | 0.53242000  | 6.06732700  | -1.60357400 |
| H  | 4.10261900  | 3.99659400  | -2.84886600 |
| H  | 2.45477600  | 5.81562500  | -3.16848700 |
| O  | 2.30919900  | 0.25161500  | -1.37098100 |
| H  | 2.75161300  | 0.36652600  | -2.22033800 |
| O  | 5.34162200  | 1.02810100  | 0.98182700  |
| H  | 5.39922100  | 1.92375600  | 0.60654300  |
| H  | 5.95505100  | 0.51042300  | 0.43502200  |
| C  | -0.43452600 | 0.91397700  | -1.35684600 |
| C  | -0.38956300 | -0.49207000 | -1.70498300 |
| O  | -1.67818800 | 0.10786500  | -1.32739000 |
| H  | -0.10371800 | 1.15889400  | -0.35917600 |
| H  | -0.00311800 | -1.19166400 | -0.98128000 |
| H  | -0.36221900 | -0.78844000 | -2.74759700 |
| C  | -0.42319300 | 2.00850100  | -2.37411700 |
| H  | -0.99581400 | 2.86964800  | -2.02463900 |
| H  | 0.60855900  | 2.32723600  | -2.52880100 |
| H  | -0.83876400 | 1.66060600  | -3.32256100 |
| C  | -1.59025300 | 4.43788800  | 2.30774400  |
| C  | -2.50922300 | 5.04523800  | 1.43342500  |
| C  | -1.39133000 | 3.07413900  | 2.30271300  |
| H  | -1.03153800 | 5.05086100  | 3.00736800  |
| C  | -3.25749600 | 4.23413000  | 0.60950200  |
| H  | -2.65315000 | 6.11780600  | 1.43937100  |
| C  | -2.08314600 | 2.21624400  | 1.40176200  |
| H  | -0.71031200 | 2.61251400  | 3.00190400  |
| C  | -3.08695700 | 2.83226900  | 0.58618900  |
| H  | -4.01805100 | 4.66761700  | -0.03279100 |
| O  | -1.76868200 | 0.96213800  | 1.36387600  |
| C  | -4.02423300 | 2.06076300  | -0.17061500 |

|    |             |             |             |
|----|-------------|-------------|-------------|
| Co | -2.66202900 | -0.39496300 | 0.34964800  |
| N  | -4.03275100 | 0.78101700  | -0.28042500 |
| H  | -4.82306600 | 2.62765500  | -0.64559100 |
| N  | -3.51198600 | -1.71303500 | -0.74674500 |
| C  | -5.12874700 | 0.04378800  | -0.91965900 |
| C  | -3.30583600 | -2.98033800 | -0.67818300 |
| C  | -4.46518400 | -1.10854400 | -1.68514200 |
| C  | -6.06646400 | 0.84452800  | -1.81899600 |
| H  | -3.90789500 | -3.63921900 | -1.30111400 |
| C  | -2.32439800 | -3.62196600 | 0.13725100  |
| C  | -5.50435000 | -2.03960400 | -2.30428100 |
| C  | -7.11298700 | -0.08469800 | -2.44831800 |
| H  | -5.48542800 | 1.33975100  | -2.60647600 |
| H  | -6.57156500 | 1.62590100  | -1.24569500 |
| C  | -2.29680600 | -5.03409200 | 0.14660500  |
| C  | -1.34467400 | -2.87866700 | 0.86777000  |
| C  | -6.45664300 | -1.24238700 | -3.20562300 |
| H  | -5.01780500 | -2.82290700 | -2.89124100 |
| H  | -6.06999800 | -2.53263900 | -1.50530400 |
| H  | -7.75962300 | 0.48848200  | -3.11798700 |
| H  | -7.75655100 | -0.48724200 | -1.65762500 |
| C  | -1.34472800 | -5.73672600 | 0.84969700  |
| H  | -3.05455900 | -5.56523100 | -0.42117000 |
| C  | -0.37022400 | -3.63499700 | 1.56895000  |
| O  | -1.26515100 | -1.58224300 | 0.88760600  |
| H  | -5.89552400 | -0.84510800 | -4.05989800 |
| H  | -7.21999000 | -1.90913300 | -3.61519800 |
| C  | -0.37297400 | -5.01297200 | 1.56249500  |
| H  | -1.34152300 | -6.81902700 | 0.85306000  |
| H  | 0.36954200  | -3.08720500 | 2.12903000  |
| H  | 0.38630400  | -5.54614300 | 2.12542700  |
| H  | -5.70030100 | -0.39997700 | -0.09579000 |
| H  | -3.86050300 | -0.65819900 | -2.48224400 |
| H  | 3.40585700  | 0.64520800  | 2.77280400  |
| H  | 1.28882800  | -1.02366500 | 1.39744600  |
| Cl | -3.94699700 | -0.96447900 | 2.10151900  |

PO-Co<sup>III</sup>-Cl + H<sub>2</sub>O-Co<sup>III</sup>-OH

Charge: 0

Spin Multiplicity: 1

Sum of electronic and thermal Free Energies (a.u.): -3164.401681

Thermal correction to Gibbs Free Energy (a.u.): 0.780627

Imaginary frequencies: -448.91

Calculation of single point energy based on the optimized structure, Et = -5640.9834404 a.u.

|    |            |             |             |
|----|------------|-------------|-------------|
| C  | 5.80102700 | -3.10154100 | -3.10845700 |
| C  | 5.10943300 | -4.10603900 | -2.41087600 |
| C  | 5.71315000 | -1.77691300 | -2.72956600 |
| H  | 6.41049300 | -3.36783600 | -3.96539600 |
| C  | 4.34306400 | -3.74768300 | -1.32313600 |
| H  | 5.18068700 | -5.14063500 | -2.72096600 |
| C  | 4.92035500 | -1.37787500 | -1.62819000 |
| H  | 6.23890900 | -0.99943700 | -3.26990900 |
| C  | 4.22969700 | -2.40268800 | -0.91001900 |
| H  | 3.80286700 | -4.50463000 | -0.76347800 |
| O  | 4.88643900 | -0.11126600 | -1.30786700 |
| C  | 3.44940800 | -2.12414100 | 0.25814500  |
| Co | 3.52640700 | 0.66958800  | -0.22258000 |
| N  | 3.20170700 | -0.95582000 | 0.73939700  |
| H  | 3.03196200 | -2.99065900 | 0.77192500  |
| N  | 2.33447000 | 1.45651500  | 1.03509300  |
| C  | 2.29819800 | -0.78639100 | 1.89449000  |
| C  | 1.63149600 | 2.51325200  | 0.84231700  |
| C  | 2.34966400 | 0.69135100  | 2.28525100  |
| C  | 2.62154700 | -1.64265200 | 3.12074800  |
| H  | 0.91374400 | 2.81725900  | 1.60016900  |
| C  | 1.73419300 | 3.34966400  | -0.32073700 |
| C  | 1.28238300 | 0.99963500  | 3.32640400  |
| C  | 1.60693000 | -1.34901000 | 4.23789900  |
| H  | 3.63930900 | -1.41050500 | 3.45476200  |
| H  | 2.60412600 | -2.70571700 | 2.87047600  |

|    |             |             |             |
|----|-------------|-------------|-------------|
| C  | 0.76008900  | 4.35042100  | -0.51267900 |
| C  | 2.82494700  | 3.22139300  | -1.23418300 |
| C  | 1.54156200  | 0.14450700  | 4.57575500  |
| H  | 1.31112100  | 2.05827700  | 3.59939100  |
| H  | 0.29477100  | 0.77927000  | 2.90936800  |
| H  | 1.86387900  | -1.92769400 | 5.12921400  |
| H  | 0.61267200  | -1.67817800 | 3.92135300  |
| C  | 0.82300600  | 5.20979300  | -1.59034500 |
| H  | -0.05771900 | 4.42119400  | 0.19602000  |
| C  | 2.86845600  | 4.12438900  | -2.32065900 |
| O  | 3.79144700  | 2.34231500  | -1.10235000 |
| H  | 2.48557300  | 0.45835500  | 5.03807500  |
| H  | 0.75337400  | 0.32385600  | 5.31096100  |
| C  | 1.89165500  | 5.08842500  | -2.49189200 |
| H  | 0.06056200  | 5.96408400  | -1.73648400 |
| H  | 3.69521400  | 4.02977900  | -3.01386600 |
| H  | 1.95404000  | 5.75846000  | -3.34268400 |
| O  | 2.21880900  | 0.17359100  | -1.44125700 |
| H  | 2.44386000  | 0.64184700  | -2.25361500 |
| O  | 5.14329400  | 1.25286700  | 0.89214500  |
| H  | 5.18639900  | 2.14378700  | 0.50468600  |
| H  | 5.77543700  | 0.73602300  | 0.36218900  |
| C  | -0.55530200 | 1.00804700  | -1.33990700 |
| C  | 0.22210700  | -0.22167500 | -1.32010200 |
| O  | -1.56626700 | 0.00550800  | -1.26444100 |
| H  | -0.48324800 | 1.60150000  | -0.43558900 |
| H  | 0.38610900  | -0.70857800 | -0.37768100 |
| H  | 0.32127800  | -0.79254900 | -2.22818100 |
| C  | -0.61850000 | 1.84348500  | -2.59350100 |
| H  | -1.46903800 | 2.52699100  | -2.54289100 |
| H  | 0.28900900  | 2.44148400  | -2.69860500 |
| H  | -0.73263800 | 1.20386600  | -3.47208900 |
| C  | -1.79108000 | 4.41756100  | 2.38632600  |
| C  | -2.71032400 | 4.97330400  | 1.47982500  |
| C  | -1.51662500 | 3.06613800  | 2.38880200  |
| H  | -1.29331500 | 5.05939400  | 3.10590000  |
| C  | -3.38541700 | 4.12022600  | 0.63319300  |
| H  | -2.91505200 | 6.03601700  | 1.47940900  |
| C  | -2.12576100 | 2.17095900  | 1.46310100  |
| H  | -0.83846400 | 2.64313600  | 3.11499300  |
| C  | -3.13703300 | 2.73143200  | 0.61646200  |
| H  | -4.14846400 | 4.51096500  | -0.03329100 |
| O  | -1.73198500 | 0.94059600  | 1.42433300  |
| C  | -4.00941000 | 1.90874300  | -0.16860400 |
| Co | -2.52152600 | -0.46711900 | 0.37903400  |
| N  | -3.94303400 | 0.63260400  | -0.27846000 |
| H  | -4.82650300 | 2.43217000  | -0.66232500 |
| N  | -3.28515600 | -1.83754700 | -0.71533200 |
| C  | -4.97830200 | -0.16325000 | -0.94760100 |
| C  | -2.99308300 | -3.08568200 | -0.66042200 |
| C  | -4.23332700 | -1.28225100 | -1.68674800 |
| C  | -5.92758900 | 0.58650300  | -1.87823400 |
| H  | -3.52968600 | -3.77442900 | -1.31065600 |
| C  | -1.99503800 | -3.67610600 | 0.17733800  |
| C  | -5.20474400 | -2.26464400 | -2.33649100 |
| C  | -6.90552100 | -0.39531600 | -2.53696800 |
| H  | -5.34754600 | 1.10866700  | -2.64893000 |
| H  | -6.48979300 | 1.34250600  | -1.32425100 |
| C  | -1.87808900 | -5.08227600 | 0.16509300  |
| C  | -1.09506300 | -2.88605300 | 0.96003200  |
| C  | -6.16710900 | -1.51842300 | -3.26999700 |
| H  | -4.66084100 | -3.02250800 | -2.90611500 |
| H  | -5.76974900 | -2.78561800 | -1.55484100 |
| H  | -7.55977200 | 0.14331800  | -3.22783000 |
| H  | -7.55165500 | -0.82960700 | -1.76532000 |
| C  | -0.91789300 | -5.74128000 | 0.90101400  |
| H  | -2.57451200 | -5.64794700 | -0.44641400 |
| C  | -0.12018700 | -3.59854000 | 1.70831200  |
| O  | -1.08945500 | -1.58923900 | 0.99658200  |

|    |             |             |             |
|----|-------------|-------------|-------------|
| H  | -5.59950100 | -1.09328300 | -4.10641800 |
| H  | -6.88198300 | -2.22357100 | -3.70249700 |
| C  | -0.03566600 | -4.97432000 | 1.67997000  |
| H  | -0.84787100 | -6.82125400 | 0.88499500  |
| H  | 0.54366000  | -3.02159900 | 2.33128600  |
| H  | 0.71978000  | -5.47063800 | 2.28091900  |
| H  | -5.54949300 | -0.63233100 | -0.13756700 |
| H  | -3.61848900 | -0.80567700 | -2.45962200 |
| H  | 3.34099400  | 0.87833800  | 2.71680600  |
| H  | 1.27737900  | -1.00277700 | 1.55805500  |
| Cl | -3.83680400 | -1.09656900 | 2.11842700  |

PO-Co<sup>III</sup>-OAc + H<sub>2</sub>O-Co<sup>III</sup>-OH

Charge: 0

Spin Multiplicity: 1

Sum of electronic and thermal Free Energies (a.u.): -2932.689039

Thermal correction to Gibbs Free Energy (a.u.): 0.822133

No imaginary frequency

Calculation of single point energy based on the optimized structure, Er = -5409.337591 a.u.

|    |             |             |             |
|----|-------------|-------------|-------------|
| C  | 6.17160100  | -3.28720100 | -3.10695000 |
| C  | 5.41218200  | -4.30905400 | -2.51140900 |
| C  | 6.08501600  | -1.98304100 | -2.66551100 |
| H  | 6.83429200  | -3.52440800 | -3.93245500 |
| C  | 4.57722600  | -3.98582700 | -1.46427000 |
| H  | 5.48411200  | -5.32848900 | -2.86827500 |
| C  | 5.22691900  | -1.61929100 | -1.59837300 |
| H  | 6.66338800  | -1.19148900 | -3.12593200 |
| C  | 4.46267100  | -2.66170400 | -0.98750600 |
| H  | 3.98310800  | -4.75745700 | -0.98453500 |
| O  | 5.19876800  | -0.37115600 | -1.22011700 |
| C  | 3.58998800  | -2.42433800 | 0.12453200  |
| Co | 3.88556800  | 0.39890400  | -0.07203200 |
| N  | 3.34943200  | -1.28506300 | 0.67011200  |
| H  | 3.08970500  | -3.30598100 | 0.52622300  |
| N  | 2.71022700  | 1.16142500  | 1.21357700  |
| C  | 2.33926400  | -1.14865100 | 1.73754900  |
| C  | 2.12561600  | 2.29937800  | 1.10198700  |
| C  | 2.52901100  | 0.24687600  | 2.34079400  |
| C  | 2.40813100  | -2.19595800 | 2.85272900  |
| H  | 1.38308700  | 2.58845500  | 1.84134300  |
| C  | 2.39213100  | 3.24636100  | 0.05741600  |
| C  | 1.42037500  | 0.55636000  | 3.33810900  |
| C  | 1.34827900  | -1.90338400 | 3.92708100  |
| H  | 3.41196100  | -2.17293800 | 3.29241800  |
| H  | 2.26115300  | -3.20279800 | 2.45498200  |
| C  | 1.53864800  | 4.36067200  | -0.06825700 |
| C  | 3.53032600  | 3.10841800  | -0.79746600 |
| C  | 1.46130500  | -0.47661200 | 4.47201500  |
| H  | 1.55011000  | 1.56053200  | 3.75199800  |
| H  | 0.45246100  | 0.51718700  | 2.82843300  |
| H  | 1.44097300  | -2.62972300 | 4.73931300  |
| H  | 0.35027200  | -2.03221000 | 3.49848000  |
| C  | 1.76015800  | 5.32613900  | -1.02895600 |
| H  | 0.68409000  | 4.43525200  | 0.59556900  |
| C  | 3.73549500  | 4.12010400  | -1.76442200 |
| O  | 4.39626000  | 2.13248600  | -0.70418300 |
| H  | 2.39945200  | -0.36615600 | 5.02946800  |
| H  | 0.64883000  | -0.28217300 | 5.17677500  |
| C  | 2.87183500  | 5.19385900  | -1.87609900 |
| H  | 1.08907200  | 6.17003400  | -1.12665500 |
| H  | 4.59465000  | 4.01739700  | -2.41585200 |
| H  | 3.05834400  | 5.94543800  | -2.63602400 |
| O  | 2.55432700  | 0.25758200  | -1.33159800 |
| H  | 3.03910500  | 0.40386000  | -2.15258700 |
| O  | 5.51975800  | 0.68187300  | 1.19184700  |
| H  | 5.63318700  | 1.60110400  | 0.89394600  |
| H  | 6.13137100  | 0.18136500  | 0.62748000  |
| C  | -0.12930500 | 1.05700600  | -1.39885500 |

|    |             |             |             |
|----|-------------|-------------|-------------|
| C  | -0.19264400 | -0.30813700 | -1.88323300 |
| O  | -1.43782000 | 0.36287000  | -1.48131000 |
| H  | 0.18557200  | 1.17517000  | -0.37372100 |
| H  | 0.10430900  | -1.10647700 | -1.22164500 |
| H  | -0.15665200 | -0.50325300 | -2.94944400 |
| C  | 0.00275400  | 2.24014700  | -2.30218100 |
| H  | -0.51828000 | 3.10475000  | -1.88694600 |
| H  | 1.06021500  | 2.49247500  | -2.39124600 |
| H  | -0.40067100 | 2.01905500  | -3.29297800 |
| C  | -1.27428000 | 4.35921900  | 2.59000200  |
| C  | -2.13391500 | 5.09727500  | 1.75795300  |
| C  | -1.12967900 | 2.99635000  | 2.44007300  |
| H  | -0.71769300 | 4.86714800  | 3.37080500  |
| C  | -2.87924800 | 4.41405900  | 0.82198800  |
| H  | -2.23477900 | 6.16826000  | 1.87630500  |
| C  | -1.82106800 | 2.27244600  | 1.42775500  |
| H  | -0.49253100 | 2.43309500  | 3.10534900  |
| C  | -2.76616600 | 3.01709200  | 0.65128000  |
| H  | -3.59234000 | 4.94881300  | 0.20197900  |
| O  | -1.55884500 | 1.01710400  | 1.26048800  |
| C  | -3.68585800 | 2.38145800  | -0.24348400 |
| Co | -2.51126100 | -0.19764100 | 0.11581000  |
| N  | -3.76828500 | 1.12220500  | -0.48335100 |
| H  | -4.40167800 | 3.04608900  | -0.72423600 |
| N  | -3.41313900 | -1.37190800 | -1.07959000 |
| C  | -4.83586100 | 0.54969300  | -1.31940900 |
| C  | -3.40920800 | -2.65120800 | -0.98485800 |
| C  | -4.20917100 | -0.63533900 | -2.06633400 |
| C  | -5.53836200 | 1.49414700  | -2.29013000 |
| H  | -4.07443600 | -3.22418600 | -1.62656600 |
| C  | -2.57154000 | -3.40915400 | -0.10492000 |
| C  | -5.27436200 | -1.42576700 | -2.81875200 |
| C  | -6.60355900 | 0.72079600  | -3.08136700 |
| H  | -4.80523800 | 1.93890000  | -2.97469100 |
| H  | -6.02097800 | 2.31386600  | -1.75187100 |
| C  | -2.77503600 | -4.80302400 | -0.03085400 |
| C  | -1.48215700 | -2.80187900 | 0.59607300  |
| C  | -6.01186900 | -0.49867400 | -3.79493100 |
| H  | -4.82148600 | -2.25243900 | -3.37329400 |
| H  | -5.97686800 | -1.85315300 | -2.09562100 |
| H  | -7.08249400 | 1.38662100  | -3.80453000 |
| H  | -7.38597600 | 0.38878600  | -2.38981500 |
| C  | -1.94431500 | -5.61908500 | 0.70598900  |
| H  | -3.61231600 | -5.22828200 | -0.57529900 |
| C  | -0.62364500 | -3.67617600 | 1.30974300  |
| O  | -1.21143500 | -1.53007900 | 0.57087800  |
| H  | -5.31153500 | -0.16159300 | -4.56881000 |
| H  | -6.80091900 | -1.05532100 | -4.30761900 |
| C  | -0.85217500 | -5.03514400 | 1.36877100  |
| H  | -2.11987500 | -6.68563500 | 0.76218500  |
| H  | 0.21624300  | -3.23532000 | 1.82190800  |
| H  | -0.17580500 | -5.66087900 | 1.94201800  |
| C  | -4.95099500 | -1.68873800 | 3.17345900  |
| H  | -4.39423000 | -2.61421000 | 3.34354100  |
| H  | -6.01546700 | -1.87797000 | 3.30491600  |
| H  | -4.59734300 | -0.95272700 | 3.89640000  |
| C  | -4.67900200 | -1.21444200 | 1.75109100  |
| O  | -3.48641300 | -0.71201000 | 1.64060700  |
| O  | -5.52349500 | -1.34621300 | 0.86966300  |
| H  | -5.55492800 | 0.12062900  | -0.61659600 |
| H  | -3.48616500 | -0.22574600 | -2.78243800 |
| H  | 3.49427400  | 0.24264400  | 2.86320600  |
| H  | 1.35153400  | -1.17246100 | 1.26001500  |

PO-Co<sup>III</sup>-OAc + H<sub>2</sub>O-Co<sup>III</sup>-OH

Charge: 0

Spin Multiplicity: 1

Sum of electronic and thermal Free Energies (a.u.): -2932.674315

Thermal correction to Gibbs Free Energy (a.u.): 0.825531

Imaginary frequencies: -447.88

Calculation of single point energy based on the optimized structure, Et = -5409.3236578 a.u.

|    |             |             |             |
|----|-------------|-------------|-------------|
| C  | 6.00044000  | -3.11991800 | -3.20881900 |
| C  | 5.23209600  | -4.15163900 | -2.64365100 |
| C  | 5.94704000  | -1.83341600 | -2.71139400 |
| H  | 6.64319900  | -3.33392600 | -4.05600300 |
| C  | 4.42364900  | -3.85975200 | -1.56679100 |
| H  | 5.27757000  | -5.15562600 | -3.04555500 |
| C  | 5.11407100  | -1.50138200 | -1.61722700 |
| H  | 6.53259100  | -1.03441500 | -3.14906800 |
| C  | 4.34283500  | -2.55450400 | -1.03485500 |
| H  | 3.82444000  | -4.64001100 | -1.10832700 |
| O  | 5.11811700  | -0.27009000 | -1.17991200 |
| C  | 3.50941700  | -2.34903800 | 0.11168300  |
| Co | 3.74722600  | 0.47220300  | -0.08144400 |
| N  | 3.28325800  | -1.22122300 | 0.68997200  |
| H  | 3.02884800  | -3.24008900 | 0.51705400  |
| N  | 2.54023300  | 1.19711900  | 1.19758200  |
| C  | 2.32404800  | -1.11514800 | 1.80810200  |
| C  | 1.90939400  | 2.30998600  | 1.08861300  |
| C  | 2.44991100  | 0.30678000  | 2.35813800  |
| C  | 2.52126500  | -2.11883600 | 2.94674500  |
| H  | 1.17410300  | 2.57818900  | 1.84288600  |
| C  | 2.11708500  | 3.25437500  | 0.02676800  |
| C  | 1.36083100  | 0.58023200  | 3.38578000  |
| C  | 1.48702600  | -1.86394600 | 4.05569400  |
| H  | 3.53875500  | -2.01020100 | 3.33947800  |
| H  | 2.42853800  | -3.14473300 | 2.58246200  |
| C  | 1.21254900  | 4.32832700  | -0.09954800 |
| C  | 3.24194300  | 3.15303800  | -0.84756000 |
| C  | 1.51284900  | -0.41291300 | 4.54688300  |
| H  | 1.44703300  | 1.60134800  | 3.76766900  |
| H  | 0.38001300  | 0.47319100  | 2.91195800  |
| H  | 1.66754700  | -2.54934100 | 4.88830600  |
| H  | 0.48544700  | -2.08428800 | 3.67552000  |
| C  | 1.37746900  | 5.28796400  | -1.07713700 |
| H  | 0.36711200  | 4.37745100  | 0.57789500  |
| C  | 3.39065200  | 4.15822300  | -1.82987400 |
| O  | 4.14921100  | 2.20676100  | -0.76735100 |
| H  | 2.45805300  | -0.21689900 | 5.06790700  |
| H  | 0.71215700  | -0.25309400 | 5.27328000  |
| C  | 2.48024200  | 5.19355600  | -1.94000500 |
| H  | 0.66787600  | 6.09942600  | -1.17513100 |
| H  | 4.24351300  | 4.08401600  | -2.49328900 |
| H  | 2.62242800  | 5.94217500  | -2.71202300 |
| O  | 2.47952100  | 0.18105100  | -1.40366200 |
| H  | 2.77502800  | 0.71128000  | -2.15300600 |
| O  | 5.33492900  | 0.84299700  | 1.16116400  |
| H  | 5.44258700  | 1.76522900  | 0.87172100  |
| H  | 5.96489000  | 0.34916300  | 0.60723700  |
| C  | -0.23129900 | 1.20449500  | -1.36456800 |
| C  | 0.46017900  | -0.07540600 | -1.41611600 |
| O  | -1.31252100 | 0.27730500  | -1.42956700 |
| H  | -0.17149100 | 1.71098800  | -0.40844800 |
| H  | 0.53276100  | -0.65738500 | -0.51695500 |
| H  | 0.56861700  | -0.57055100 | -2.36679100 |
| C  | -0.16452900 | 2.14718200  | -2.53973400 |
| H  | -0.96915800 | 2.88287300  | -2.47327700 |
| H  | 0.78562500  | 2.68548400  | -2.54211500 |
| H  | -0.26919800 | 1.59591600  | -3.47743600 |
| C  | -1.42990900 | 4.30905800  | 2.74724200  |
| C  | -2.26356400 | 5.03330500  | 1.87890900  |
| C  | -1.23224800 | 2.95359700  | 2.58305500  |
| H  | -0.93686600 | 4.81995700  | 3.56784600  |
| C  | -2.93463900 | 4.34104100  | 0.89267300  |
| H  | -2.40715500 | 6.09824400  | 2.00773900  |
| C  | -1.83837800 | 2.22586100  | 1.51895000  |
| H  | -0.61787200 | 2.39954000  | 3.27732500  |
| C  | -2.76681400 | 2.95313300  | 0.70588000  |

|    |             |             |             |
|----|-------------|-------------|-------------|
| H  | -3.63138100 | 4.86332100  | 0.24395800  |
| O  | -1.51201600 | 0.98922500  | 1.33170300  |
| C  | -3.62164800 | 2.30298100  | -0.24553800 |
| Co | -2.38074300 | -0.24272100 | 0.12742100  |
| N  | -3.65227200 | 1.04744100  | -0.50596600 |
| H  | -4.33542000 | 2.95363700  | -0.74838700 |
| N  | -3.22374200 | -1.44121300 | -1.08422000 |
| C  | -4.66535600 | 0.45408300  | -1.39350200 |
| C  | -3.18028600 | -2.71813700 | -1.00275400 |
| C  | -3.98189600 | -0.71899800 | -2.10841400 |
| C  | -5.33668800 | 1.38654100  | -2.39739700 |
| H  | -3.79806300 | -3.30583400 | -1.67812100 |
| C  | -2.35605200 | -3.46181800 | -0.09464200 |
| C  | -4.99512400 | -1.52732200 | -2.91177400 |
| C  | -6.34738800 | 0.59518300  | -3.24044600 |
| H  | -4.57779000 | 1.84399400  | -3.04454100 |
| H  | -5.86032100 | 2.19747500  | -1.88462600 |
| C  | -2.52411800 | -4.86021600 | -0.04495000 |
| C  | -1.31688200 | -2.83325300 | 0.66246600  |
| C  | -5.69930800 | -0.61289400 | -3.92361600 |
| H  | -4.50077700 | -2.34511700 | -3.44351100 |
| H  | -5.72531100 | -1.96827500 | -2.22485900 |
| H  | -6.80219700 | 1.25303700  | -3.98638000 |
| H  | -7.15675700 | 0.24843300  | -2.58813500 |
| C  | -1.70957900 | -5.66582200 | 0.72279200  |
| H  | -3.32234000 | -5.30040900 | -0.63456300 |
| C  | -0.47730700 | -3.69579400 | 1.41503300  |
| O  | -1.07767600 | -1.55665600 | 0.66344700  |
| H  | -4.96665600 | -0.26235400 | -4.66071600 |
| H  | -6.45196200 | -1.18237700 | -4.47576800 |
| C  | -0.67138300 | -5.06153400 | 1.44886700  |
| H  | -1.86011800 | -6.73714700 | 0.75758900  |
| H  | 0.31771100  | -3.24149200 | 1.98460000  |
| H  | -0.01132000 | -5.67499000 | 2.05387400  |
| C  | -4.91278600 | -1.81512600 | 3.09510600  |
| H  | -4.35061900 | -2.73764600 | 3.26436400  |
| H  | -5.97858900 | -2.01981300 | 3.18851900  |
| H  | -4.59210600 | -1.09080700 | 3.84504700  |
| C  | -4.59795700 | -1.30636000 | 1.69234500  |
| O  | -3.41228000 | -0.78810000 | 1.62680500  |
| O  | -5.41604700 | -1.43146300 | 0.78284600  |
| H  | -5.40742700 | 0.01206700  | -0.72271800 |
| H  | -3.22558600 | -0.29921300 | -2.78155200 |
| H  | 3.43077000  | 0.37871000  | 2.84468000  |
| H  | 1.31288900  | -1.22282400 | 1.39718000  |

PO-Co<sup>III</sup>-OTs + H<sub>2</sub>O-Co<sup>III</sup>-OH

Charge: 0

Spin Multiplicity: 1

Sum of electronic and thermal Free Energies (a.u.): -3599.035779

Thermal correction to Gibbs Free Energy (a.u.): 0.898344

No imaginary frequency

Calculation of single point energy based on the optimized structure, Er = -6075.8623111 a.u.

|    |            |             |             |
|----|------------|-------------|-------------|
| C  | 6.83252100 | -3.53972200 | -1.41340300 |
| C  | 5.96994900 | -4.36959400 | -0.67763600 |
| C  | 6.71178300 | -2.16522300 | -1.37052500 |
| H  | 7.60435600 | -3.98457000 | -2.03259300 |
| C  | 4.99861400 | -3.78401200 | 0.10596500  |
| H  | 6.06958800 | -5.44657800 | -0.72346800 |
| C  | 5.71285500 | -1.53702600 | -0.58812700 |
| H  | 7.36993300 | -1.52270900 | -1.94251300 |
| C  | 4.84756900 | -2.38260900 | 0.17224200  |
| H  | 4.32160600 | -4.40115800 | 0.68832300  |
| O  | 5.64940300 | -0.23265800 | -0.58268300 |
| C  | 3.83855600 | -1.85707600 | 1.04414600  |
| Co | 4.14548500 | 0.77116500  | 0.02261100  |
| N  | 3.53930900 | -0.61482200 | 1.18995900  |
| H  | 3.28001600 | -2.59392600 | 1.62128700  |
| N  | 2.73782200 | 1.81038500  | 0.77618600  |

|    |             |             |             |
|----|-------------|-------------|-------------|
| C  | 2.39764400  | -0.21714100 | 2.03392100  |
| C  | 2.17707700  | 2.81433900  | 0.20598900  |
| C  | 2.38761800  | 1.31184300  | 2.10837200  |
| C  | 2.40772800  | -0.76792100 | 3.46329300  |
| H  | 1.31887500  | 3.27891300  | 0.68417800  |
| C  | 2.61485900  | 3.39971900  | -1.02955600 |
| C  | 1.08201000  | 1.77907200  | 2.74504500  |
| C  | 1.14251700  | -0.30481600 | 4.20249200  |
| H  | 3.30990500  | -0.40443600 | 3.96911100  |
| H  | 2.46676900  | -1.85808000 | 3.46774500  |
| C  | 1.78768500  | 4.35946200  | -1.64592000 |
| C  | 3.88655900  | 3.07585500  | -1.59808100 |
| C  | 0.99775100  | 1.22162200  | 4.17496500  |
| H  | 1.03157500  | 2.87174200  | 2.77692000  |
| H  | 0.23911900  | 1.40894000  | 2.15368900  |
| H  | 1.17135700  | -0.65759700 | 5.23719300  |
| H  | 0.25656700  | -0.74819600 | 3.73998000  |
| C  | 2.16188200  | 4.98479700  | -2.81714300 |
| H  | 0.82771800  | 4.57999800  | -1.19166500 |
| C  | 4.24824400  | 3.74398700  | -2.79217400 |
| O  | 4.73173200  | 2.23823500  | -1.05910400 |
| H  | 1.78588700  | 1.68157300  | 4.78399300  |
| H  | 0.04410400  | 1.50961600  | 4.62478800  |
| C  | 3.40702200  | 4.66666400  | -3.38367800 |
| H  | 1.50939600  | 5.70747400  | -3.29051500 |
| H  | 5.20995400  | 3.49829800  | -3.22552300 |
| H  | 3.71587300  | 5.15091300  | -4.30411100 |
| O  | 3.05628000  | 0.13352500  | -1.31647000 |
| H  | 3.66968500  | 0.06450500  | -2.05756000 |
| O  | 5.52876300  | 1.55737400  | 1.36465900  |
| H  | 5.70167300  | 2.32827300  | 0.79731400  |
| H  | 6.22623900  | 0.92826600  | 1.11704900  |
| C  | 0.39739300  | 0.35033100  | -1.99039200 |
| C  | 0.49050800  | -1.06376800 | -2.30134600 |
| O  | -0.84242300 | -0.47343900 | -2.10569500 |
| H  | 0.59569700  | 0.61324300  | -0.96341900 |
| H  | 0.79358200  | -1.73796800 | -1.51488700 |
| H  | 0.64579000  | -1.38445700 | -3.32585200 |
| C  | 0.51070800  | 1.42592900  | -3.02009700 |
| H  | -0.12347000 | 2.27594100  | -2.76187100 |
| H  | 1.54559000  | 1.76777700  | -3.04669200 |
| H  | 0.22382500  | 1.05397900  | -4.00629600 |
| C  | -1.78057600 | 4.39123800  | -0.04071600 |
| C  | -2.70690500 | 4.56388800  | -1.08389600 |
| C  | -1.42081500 | 3.13539500  | 0.39513200  |
| H  | -1.35102800 | 5.26193300  | 0.44410200  |
| C  | -3.27734100 | 3.44156000  | -1.64115800 |
| H  | -2.98156800 | 5.55458000  | -1.42231900 |
| C  | -1.94505600 | 1.95550000  | -0.19613500 |
| H  | -0.74611900 | 3.01051200  | 1.22634000  |
| C  | -2.92532200 | 2.14094400  | -1.22043000 |
| H  | -4.02674100 | 3.54277500  | -2.42004200 |
| O  | -1.52695400 | 0.80483800  | 0.23474000  |
| C  | -3.66087300 | 1.04317400  | -1.76563300 |
| Co | -1.95687200 | -0.89414100 | -0.52853100 |
| N  | -3.44183500 | -0.19784200 | -1.51973200 |
| H  | -4.49458300 | 1.30757400  | -2.41402500 |
| N  | -2.37682600 | -2.55497500 | -1.39183500 |
| C  | -4.29582900 | -1.28086700 | -2.01181100 |
| C  | -1.97627700 | -3.71067800 | -0.99238800 |
| C  | -3.32700200 | -2.37348500 | -2.49408200 |
| C  | -5.31765900 | -0.91645600 | -3.08431800 |
| H  | -2.35154000 | -4.59595000 | -1.50223900 |
| C  | -1.07742800 | -3.94821200 | 0.08909400  |
| C  | -4.07564500 | -3.61937400 | -2.96103800 |
| C  | -6.06946800 | -2.17068500 | -3.54798700 |
| H  | -4.80502600 | -0.45724400 | -3.93829600 |
| H  | -6.02868900 | -0.18127100 | -2.69780200 |
| C  | -0.85517000 | -5.28704500 | 0.48361100  |



|   |             |             |             |
|---|-------------|-------------|-------------|
| C | -0.41684300 | -2.87942100 | 0.76861500  |
| C | -5.10282800 | -3.25181100 | -4.03950700 |
| H | -3.37576200 | -4.36007800 | -3.35688700 |
| H | -4.58517700 | -4.07586300 | -2.10475100 |
| H | -6.77633600 | -1.90514500 | -4.33835600 |
| H | -6.66207100 | -2.56495000 | -2.71453400 |
| C | -0.03172900 | -5.59953100 | 1.54038600  |
| H | -1.36486100 | -6.07521200 | -0.06174300 |
| C | 0.39134200  | -3.23367100 | 1.87470400  |
| O | -0.48123600 | -1.62991600 | 0.40711900  |
| H | -4.57813300 | -2.89132400 | -4.93237200 |
| H | -5.65463200 | -4.14609800 | -4.34022900 |
| C | 0.58160000  | -4.54725900 | 2.24369300  |
| H | 0.12216800  | -6.62808400 | 1.83995800  |
| H | 0.81663200  | -2.42911600 | 2.44699600  |
| H | 1.19864300  | -4.76941900 | 3.10821800  |
| H | -4.80926000 | -1.67683600 | -1.12732900 |
| H | -2.75996200 | -1.95244000 | -3.33417200 |
| H | 3.22794500  | 1.61195600  | 2.74723800  |
| H | 1.48530800  | -0.53219200 | 1.51322100  |
| S | -3.20754400 | -1.02120300 | 2.33136400  |
| O | -4.30733800 | -1.77592900 | 2.93139700  |
| O | -1.89348100 | -1.09204500 | 2.97348400  |
| O | -3.17751800 | -1.41805600 | 0.82786900  |
| C | -3.68295900 | 0.70870700  | 2.30909200  |
| C | -4.75842700 | 1.12013000  | 1.52923200  |
| C | -2.98917300 | 1.61813300  | 3.09541500  |
| C | -5.11707100 | 2.46208400  | 1.51718500  |
| H | -5.29470400 | 0.39578600  | 0.92992200  |
| C | -3.36606400 | 2.95648800  | 3.08225300  |
| H | -2.15422600 | 1.27068100  | 3.68846700  |
| C | -4.42463000 | 3.40158700  | 2.28672600  |
| H | -5.94379700 | 2.78961800  | 0.89578400  |
| H | -2.81947100 | 3.67071800  | 3.68913500  |
| C | -4.77784200 | 4.86385800  | 2.21828500  |
| H | -4.49615000 | 5.38586300  | 3.13515700  |
| H | -4.25095700 | 5.34148000  | 1.38582900  |
| H | -5.84845700 | 5.00948200  | 2.05750000  |

PO-Co<sup>III</sup>-OTs + H<sub>2</sub>O-Co<sup>III</sup>-OH

Charge: 0

Spin Multiplicity: 1

Sum of electronic and thermal Free Energies (a.u.): -3599.022647

Thermal correction to Gibbs Free Energy (a.u.): 0.900871

Imaginary frequencies: -447.39

Calculation of single point energy based on the optimized structure, Et = -6075.8481186 a.u.

|    |             |             |             |
|----|-------------|-------------|-------------|
| C  | -7.19673700 | 2.89214400  | -1.33780100 |
| C  | -6.41000600 | 3.83350300  | -0.65397600 |
| C  | -6.92529100 | 1.54036200  | -1.25913000 |
| H  | -8.02939600 | 3.23052000  | -1.94521500 |
| C  | -5.35924100 | 3.38286900  | 0.11626400  |
| H  | -6.62810400 | 4.89118400  | -0.72783400 |
| C  | -5.84286400 | 1.05127900  | -0.49183300 |
| H  | -7.52571800 | 0.81258200  | -1.79090700 |
| C  | -5.05352400 | 2.00903000  | 0.21640900  |
| H  | -4.73905100 | 4.08821800  | 0.66015700  |
| O  | -5.64180600 | -0.24027500 | -0.44362600 |
| C  | -3.97536700 | 1.62277200  | 1.07789000  |
| Co | -3.98326800 | -1.02641200 | 0.07194100  |
| N  | -3.52852100 | 0.42578500  | 1.23361800  |
| H  | -3.49941800 | 2.42617300  | 1.64094600  |
| N  | -2.43271300 | -1.86580400 | 0.79385700  |
| C  | -2.34857100 | 0.16406100  | 2.08243400  |
| C  | -1.74145700 | -2.77865300 | 0.21517400  |
| C  | -2.16165100 | -1.35177100 | 2.14088000  |
| C  | -2.42359900 | 0.70448300  | 3.51265200  |
| H  | -0.82641500 | -3.12608000 | 0.68737300  |
| C  | -2.10153300 | -3.40069500 | -1.02896700 |
| C  | -0.82235600 | -1.68214300 | 2.78833200  |

|    |             |             |             |
|----|-------------|-------------|-------------|
| C  | -1.11548400 | 0.37508100  | 4.25163400  |
| H  | -3.28147900 | 0.24485100  | 4.01747600  |
| H  | -2.59719000 | 1.78259100  | 3.51613100  |
| C  | -1.15033400 | -4.22282100 | -1.66566400 |
| C  | -3.41027000 | -3.25176700 | -1.58273700 |
| C  | -0.81030400 | -1.12674300 | 4.22087000  |
| H  | -0.66818700 | -2.76495500 | 2.81851500  |
| H  | -0.01531800 | -1.22984900 | 2.20482600  |
| H  | -1.18172700 | 0.72274500  | 5.28625400  |
| H  | -0.27730400 | 0.90380900  | 3.78937900  |
| C  | -1.44681200 | -4.88038300 | -2.84209100 |
| H  | -0.16463200 | -4.31164000 | -1.22200200 |
| C  | -3.68718000 | -3.94679800 | -2.78239900 |
| O  | -4.36335900 | -2.54203600 | -1.02718700 |
| H  | -1.54858400 | -1.67023300 | 4.82395600  |
| H  | 0.16726800  | -1.31126900 | 4.67285000  |
| C  | -2.72947200 | -4.73548600 | -3.39315500 |
| H  | -0.70289100 | -5.49615200 | -3.33116100 |
| H  | -4.67870700 | -3.83586900 | -3.20384000 |
| H  | -2.97691700 | -5.24737300 | -4.31698200 |
| O  | -3.10831600 | -0.18053600 | -1.32889500 |
| H  | -3.56289100 | -0.48973600 | -2.12090100 |
| O  | -5.18145400 | -1.99093400 | 1.42764100  |
| H  | -5.27325600 | -2.79531300 | 0.88904100  |
| H  | -5.96833200 | -1.46498100 | 1.20030500  |
| C  | -0.31820800 | -0.59048300 | -2.02613600 |
| C  | -1.18428800 | 0.51682000  | -1.66553700 |
| O  | 0.56379000  | 0.54225600  | -2.01527200 |
| H  | -0.11761300 | -1.28885300 | -1.22308500 |
| H  | -1.19677200 | 0.85857200  | -0.64914000 |
| H  | -1.58107000 | 1.15182300  | -2.44056700 |
| C  | -0.43925700 | -1.24354100 | -3.37781900 |
| H  | 0.46247900  | -1.81938000 | -3.59780100 |
| H  | -1.28995500 | -1.92722800 | -3.39011600 |
| H  | -0.57402700 | -0.48682100 | -4.15432700 |
| C  | 2.18260700  | -4.27790500 | 0.31303300  |
| C  | 2.96582600  | -4.44515200 | -0.84117900 |
| C  | 1.74186900  | -3.03234900 | 0.70474500  |
| H  | 1.93025300  | -5.14115900 | 0.92003000  |
| C  | 3.32927700  | -3.32005800 | -1.54862500 |
| H  | 3.30314100  | -5.42767400 | -1.14510900 |
| C  | 2.03326100  | -1.86019300 | -0.04423400 |
| H  | 1.18774000  | -2.91018100 | 1.62108800  |
| C  | 2.89612100  | -2.03146900 | -1.17202200 |
| H  | 3.98136500  | -3.40890100 | -2.41212500 |
| O  | 1.51940000  | -0.72932600 | 0.33110600  |
| C  | 3.46984900  | -0.91217800 | -1.85512500 |
| Co | 1.75540800  | 0.96857600  | -0.53783200 |
| N  | 3.19322900  | 0.32045600  | -1.63333000 |
| H  | 4.24282900  | -1.15182500 | -2.58344400 |
| N  | 2.02447400  | 2.62646500  | -1.46359200 |
| C  | 3.92135000  | 1.42723200  | -2.25983900 |
| C  | 1.60004700  | 3.77240500  | -1.06956400 |
| C  | 2.84583300  | 2.44756500  | -2.66284800 |
| C  | 4.83428300  | 1.07155300  | -3.42951200 |
| H  | 1.87929100  | 4.65525300  | -1.64164800 |
| C  | 0.77971300  | 4.00724000  | 0.07461000  |
| C  | 3.46510300  | 3.70849100  | -3.26095000 |
| C  | 5.45536100  | 2.34155500  | -4.02463600 |
| H  | 4.25360100  | 0.54996100  | -4.20003800 |
| H  | 5.62648800  | 0.39237800  | -3.10284500 |
| C  | 0.51116000  | 5.34733900  | 0.42962300  |
| C  | 0.22447500  | 2.93489100  | 0.83654600  |
| C  | 4.37844900  | 3.34765600  | -4.43928400 |
| H  | 2.68308800  | 4.39385500  | -3.59819700 |
| H  | 4.04515300  | 4.22850700  | -2.48974400 |
| H  | 6.08090700  | 2.07845900  | -4.88171700 |
| H  | 6.11646500  | 2.80253200  | -3.28173200 |
| C  | -0.26360900 | 5.66511200  | 1.52194900  |

|   |             |             |             |
|---|-------------|-------------|-------------|
| H | 0.94250800  | 6.13574400  | -0.17945100 |
| C | -0.54131200 | 3.29728100  | 1.97205300  |
| O | 0.34362500  | 1.67565600  | 0.53040800  |
| H | 3.77435000  | 2.92021600  | -5.24847900 |
| H | 4.83979900  | 4.25493200  | -4.83795200 |
| C | -0.78000200 | 4.61455200  | 2.29968500  |
| H | -0.45286000 | 6.69678000  | 1.78895900  |
| H | -0.89193000 | 2.50150200  | 2.60454000  |
| H | -1.35907500 | 4.84066900  | 3.18918100  |
| H | 4.50923900  | 1.88376100  | -1.45395400 |
| H | 2.20138300  | 1.96337100  | -3.40635100 |
| H | -2.97228500 | -1.75693200 | 2.75932900  |
| H | -1.47280800 | 0.58590500  | 1.57596300  |
| S | 3.20199600  | 1.27807200  | 2.23454800  |
| O | 4.25357300  | 2.15511800  | 2.75127200  |
| O | 1.92667000  | 1.24670000  | 2.95670400  |
| O | 3.05688400  | 1.59414200  | 0.72465200  |
| C | 3.84200700  | -0.40010300 | 2.25754700  |
| C | 4.84396100  | -0.77383400 | 1.36794000  |
| C | 3.35766500  | -1.30221700 | 3.19480500  |
| C | 5.33781900  | -2.07126400 | 1.40148900  |
| H | 5.21316600  | -0.05586100 | 0.64732900  |
| C | 3.87077700  | -2.59508400 | 3.22669400  |
| H | 2.57505400  | -0.98730800 | 3.87231000  |
| C | 4.85723300  | -3.00321000 | 2.32651700  |
| H | 6.10384400  | -2.37086100 | 0.69402800  |
| H | 3.48761300  | -3.30374400 | 3.95363800  |
| C | 5.35656700  | -4.42406100 | 2.31383800  |
| H | 4.85143000  | -4.99742500 | 1.52954900  |
| H | 6.42979300  | -4.46876400 | 2.11330100  |
| H | 5.16726800  | -4.92203700 | 3.26692400  |
